# Supplementary material
Source: MDPI journal article supplement (https://www.mdpi.com/2073-4352/12/5/663)
Supplement: s1 [file s1]

Archive with 12 entries (12 files):
- 1-2 Checkcif.pdf
- 1-2 CIF.cif
- 13C NMR of 1 and 2.pdf
- 13C NMR of 1.pdf
- 13C NMR of 2.pdf
- 1-DMF Checkcif.pdf
- 1-DMF CIF.cif
- 1H NMR of 1 (D2O).pdf
- 1H NMR of 1 and 2 (D2O).pdf
- 1H NMR of 1 and 2.pdf
- 1H NMR of 1.pdf
- 1H NMR of 2.pdf
