# Supplementary material
Source: MDPI journal article supplement (https://www.mdpi.com/2073-4352/12/5/663)
Supplement: s1 [file s1 › 1-2 CIF.cif]

 
data_bmk1962b
 
_audit_creation_method            'SHELXL-2018/1'
_shelx_SHELXL_version_number      '2018/1'
_chemical_name_systematic         ?
_chemical_name_common             ?
_chemical_melting_point           ?
_chemical_formula_moiety          ?
_chemical_formula_sum
 'C35 H35 N3 O5 S' 
_chemical_formula_weight          609.72

loop_
 _atom_type_symbol
 _atom_type_description
 _atom_type_scat_dispersion_real
 _atom_type_scat_dispersion_imag
 _atom_type_scat_source
 'C'  'C'   0.0033   0.0016
 'International Tables Vol C Tables 4.2.6.8 and 6.1.1.4'
 'H'  'H'   0.0000   0.0000
 'International Tables Vol C Tables 4.2.6.8 and 6.1.1.4'
 'N'  'N'   0.0061   0.0033
 'International Tables Vol C Tables 4.2.6.8 and 6.1.1.4'
 'O'  'O'   0.0106   0.0060
 'International Tables Vol C Tables 4.2.6.8 and 6.1.1.4'
 'S'  'S'   0.1246   0.1234
 'International Tables Vol C Tables 4.2.6.8 and 6.1.1.4'
 
_space_group_crystal_system       triclinic
_space_group_IT_number            2
_space_group_name_H-M_alt         'P -1'
_space_group_name_Hall            '-P 1'
 
_shelx_space_group_comment
;
The symmetry employed for this shelxl refinement is uniquely defined
by the following loop, which should always be used as a source of
symmetry information in preference to the above space-group names.
They are only intended as comments.
;
 
loop_
 _space_group_symop_operation_xyz
 'x, y, z'
 '-x, -y, -z'
 
_cell_length_a                    9.6162(6)
_cell_length_b                    13.2978(11)
_cell_length_c                    14.2415(11)
_cell_angle_alpha                 70.629(7)
_cell_angle_beta                  74.519(6)
_cell_angle_gamma                 72.199(7)
_cell_volume                      1607.8(2)
_cell_formula_units_Z             2
_cell_measurement_temperature     293(2)
_cell_measurement_reflns_used   2983
_cell_measurement_theta_min     4.1310
_cell_measurement_theta_max     24.3300
 
_exptl_crystal_description        needle
_exptl_crystal_colour             ?
_exptl_crystal_density_meas       ?
_exptl_crystal_density_method     ?
_exptl_crystal_density_diffrn     1.259          
_exptl_crystal_F_000              644
_exptl_transmission_factor_min    ?
_exptl_transmission_factor_max    ?
_exptl_crystal_size_max           0.389
_exptl_crystal_size_mid           0.105
_exptl_crystal_size_min           0.079
_exptl_absorpt_coefficient_mu     0.146
_shelx_estimated_absorpt_T_min    0.945
_shelx_estimated_absorpt_T_max    0.989
_exptl_absorpt_correction_T_min                     0.727
_exptl_absorpt_correction_T_max                     1.000
_exptl_absorpt_correction_type            gaussian
_exptl_absorpt_process_details
;
CrysAlisPro 1.171.39.46 (Rigaku Oxford Diffraction, 2018)
Numerical absorption correction based on gaussian integration over
			a multifaceted crystal model
Empirical absorption correction using spherical harmonics,
 implemented in SCALE3 ABSPACK scaling algorithm.
;
_diffrn_ambient_temperature       293(2)
_diffrn_radiation_wavelength      0.71073
_diffrn_radiation_type            MoK\a
_diffrn_source                    ?
_diffrn_measurement_device_type 'SuperNova, Dual, Cu at home/near, Atlas'
_diffrn_measurement_method '\w scans'
_diffrn_detector_area_resol_mean  ?
_diffrn_reflns_number             15540
_diffrn_reflns_av_unetI/netI      0.0827
_diffrn_reflns_av_R_equivalents   0.0451
_diffrn_reflns_limit_h_min        -13
_diffrn_reflns_limit_h_max        13
_diffrn_reflns_limit_k_min        -17
_diffrn_reflns_limit_k_max        18
_diffrn_reflns_limit_l_min        -17
_diffrn_reflns_limit_l_max        15
_diffrn_reflns_theta_min          3.313
_diffrn_reflns_theta_max          29.972
_diffrn_reflns_theta_full         25.242
_diffrn_measured_fraction_theta_max   0.823
_diffrn_measured_fraction_theta_full  0.997
_diffrn_reflns_Laue_measured_fraction_max    0.823
_diffrn_reflns_Laue_measured_fraction_full   0.997
_diffrn_reflns_point_group_measured_fraction_max   0.823
_diffrn_reflns_point_group_measured_fraction_full  0.997
_reflns_number_total              7698
_reflns_number_gt                 3716
_reflns_threshold_expression      'I > 2\s(I)'
_reflns_Friedel_coverage          0.000
_reflns_Friedel_fraction_max      .
_reflns_Friedel_fraction_full     .
 
_reflns_special_details
;
 Reflections were merged by SHELXL according to the crystal
 class for the calculation of statistics and refinement.
 
 _reflns_Friedel_fraction is defined as the number of unique
 Friedel pairs measured divided by the number that would be
 possible theoretically, ignoring centric projections and
 systematic absences.
;
 
_computing_data_collection     'CrysAlisPro 1.171.39.46 (Rigaku OD, 2018)'
_computing_cell_refinement     'CrysAlisPro 1.171.39.46 (Rigaku OD, 2018)'
_computing_data_reduction      'CrysAlisPro 1.171.39.46 (Rigaku OD, 2018)'
_computing_structure_solution   'SHELXS'
_computing_structure_refinement 'SHELXL-2018/1 (Sheldrick, 2018)'
_computing_molecular_graphics     ?
_computing_publication_material   ?
_refine_special_details           ?
_refine_ls_structure_factor_coef  Fsqd
_refine_ls_matrix_type            full
_refine_ls_weighting_scheme       calc
_refine_ls_weighting_details
'w=1/[\s^2^(Fo^2^)+(0.0599P)^2^+0.2149P] where P=(Fo^2^+2Fc^2^)/3'
_atom_sites_solution_primary      ?
_atom_sites_solution_secondary    ?
_atom_sites_solution_hydrogens    geom
_refine_ls_hydrogen_treatment     constr
_refine_ls_extinction_method      none
_refine_ls_extinction_coef        .
_refine_ls_number_reflns          7698
_refine_ls_number_parameters      401
_refine_ls_number_restraints      0
_refine_ls_R_factor_all           0.1434
_refine_ls_R_factor_gt            0.0633
_refine_ls_wR_factor_ref          0.1808
_refine_ls_wR_factor_gt           0.1363
_refine_ls_goodness_of_fit_ref    1.028
_refine_ls_restrained_S_all       1.028
_refine_ls_shift/su_max           0.000
_refine_ls_shift/su_mean          0.000
 
loop_
 _atom_site_label
 _atom_site_type_symbol
 _atom_site_fract_x
 _atom_site_fract_y
 _atom_site_fract_z
 _atom_site_U_iso_or_equiv
 _atom_site_adp_type
 _atom_site_occupancy
 _atom_site_site_symmetry_order  
 _atom_site_calc_flag
 _atom_site_refinement_flags_posn
 _atom_site_refinement_flags_adp
 _atom_site_refinement_flags_occupancy
 _atom_site_disorder_assembly
 _atom_site_disorder_group
C1 C 0.8408(4) 0.7107(4) 1.2026(3) 0.0948(12) Uani 1 1 d . . . . .
H1A H 0.915518 0.642905 1.210215 0.142 Uiso 1 1 calc R U . . .
H1B H 0.785995 0.717666 1.268096 0.142 Uiso 1 1 calc R U . . .
H1C H 0.887421 0.770994 1.169479 0.142 Uiso 1 1 calc R U . . .
C2 C 0.8030(3) 0.6863(3) 1.0535(2) 0.0666(8) Uani 1 1 d . . . . .
C3 C 0.7046(3) 0.6862(4) 0.9998(3) 0.0906(12) Uani 1 1 d . . . . .
H3 H 0.603269 0.701630 1.026023 0.109 Uiso 1 1 calc R U . . .
C4 C 0.7537(3) 0.6635(3) 0.9071(2) 0.0764(10) Uani 1 1 d . . . . .
H4 H 0.685374 0.664632 0.871051 0.092 Uiso 1 1 calc R U . . .
C5 C 0.9044(3) 0.6389(2) 0.86726(18) 0.0494(7) Uani 1 1 d . . . . .
C6 C 1.0012(3) 0.6376(2) 0.9240(2) 0.0572(7) Uani 1 1 d . . . . .
H6 H 1.102807 0.619910 0.899238 0.069 Uiso 1 1 calc R U . . .
C7 C 0.9532(3) 0.6613(3) 1.0155(2) 0.0624(8) Uani 1 1 d . . . . .
H7 H 1.021201 0.660593 1.051655 0.075 Uiso 1 1 calc R U . . .
C8 C 0.9576(3) 0.6158(2) 0.76950(19) 0.0493(6) Uani 1 1 d . . . . .
C9 C 0.8621(3) 0.6195(3) 0.69960(18) 0.0571(7) Uani 1 1 d . . . . .
H9A H 0.786343 0.687717 0.688833 0.069 Uiso 1 1 calc R U . . .
H9B H 0.814704 0.558380 0.726049 0.069 Uiso 1 1 calc R U . . .
C10 C 0.9749(3) 0.6109(2) 0.60138(18) 0.0502(7) Uani 1 1 d . . . . .
H10 H 0.961418 0.555287 0.575704 0.060 Uiso 1 1 calc R U . . .
C11 C 1.2509(3) 0.5315(2) 0.59086(18) 0.0476(6) Uani 1 1 d . . . . .
C12 C 0.9648(3) 0.7189(2) 0.52031(18) 0.0469(6) Uani 1 1 d . . . . .
C13 C 0.8560(3) 0.7524(2) 0.4618(2) 0.0564(7) Uani 1 1 d . . . . .
H13 H 0.792585 0.707387 0.472650 0.068 Uiso 1 1 calc R U . . .
C14 C 0.8399(3) 0.8510(2) 0.3880(2) 0.0613(8) Uani 1 1 d . . . . .
H14 H 0.766298 0.872055 0.349502 0.074 Uiso 1 1 calc R U . . .
C15 C 0.9333(3) 0.9187(2) 0.3713(2) 0.0559(7) Uani 1 1 d . . . . .
C16 C 1.0396(3) 0.8882(3) 0.4300(2) 0.0610(8) Uani 1 1 d . . . . .
H16 H 1.101269 0.934072 0.420199 0.073 Uiso 1 1 calc R U . . .
C17 C 1.0545(3) 0.7887(2) 0.5038(2) 0.0564(7) Uani 1 1 d . . . . .
H17 H 1.126873 0.768521 0.543234 0.068 Uiso 1 1 calc R U . . .
C18 C 1.0106(5) 1.0815(3) 0.2664(3) 0.1167(15) Uani 1 1 d . . . . .
H18A H 1.014006 1.102495 0.323958 0.175 Uiso 1 1 calc R U . . .
H18B H 0.979164 1.146037 0.214052 0.175 Uiso 1 1 calc R U . . .
H18C H 1.107593 1.041594 0.241743 0.175 Uiso 1 1 calc R U . . .
C19 C 0.2359(5) 0.7050(3) 1.2487(2) 0.0981(12) Uani 1 1 d . . . . .
H19A H 0.175092 0.655762 1.258208 0.147 Uiso 1 1 calc R U . . .
H19B H 0.204593 0.738005 1.303812 0.147 Uiso 1 1 calc R U . . .
H19C H 0.337869 0.664980 1.246522 0.147 Uiso 1 1 calc R U . . .
C20 C 0.2660(3) 0.7584(3) 1.0676(2) 0.0642(8) Uani 1 1 d . . . . .
C21 C 0.2562(4) 0.8427(3) 0.9796(2) 0.0775(9) Uani 1 1 d . . . . .
H21 H 0.218289 0.914797 0.983502 0.093 Uiso 1 1 calc R U . . .
C22 C 0.3015(4) 0.8222(3) 0.8865(2) 0.0701(9) Uani 1 1 d . . . . .
H22 H 0.294055 0.880363 0.828185 0.084 Uiso 1 1 calc R U . . .
C23 C 0.3582(3) 0.7158(2) 0.8783(2) 0.0544(7) Uani 1 1 d . . . . .
C24 C 0.3638(3) 0.6314(3) 0.9675(2) 0.0590(7) Uani 1 1 d . . . . .
H24 H 0.398119 0.559130 0.963797 0.071 Uiso 1 1 calc R U . . .
C25 C 0.3198(3) 0.6515(3) 1.0616(2) 0.0621(8) Uani 1 1 d . . . . .
H25 H 0.326477 0.593653 1.120177 0.075 Uiso 1 1 calc R U . . .
C26 C 0.4138(3) 0.6868(3) 0.7807(2) 0.0595(7) Uani 1 1 d . . . . .
C27 C 0.3969(3) 0.7722(3) 0.6856(2) 0.0607(7) Uani 1 1 d . . . . .
H27 H 0.348779 0.843742 0.687872 0.073 Uiso 1 1 calc R U . . .
C28 C 0.4476(3) 0.7514(3) 0.5962(2) 0.0582(7) Uani 1 1 d . . . . .
H28 H 0.498134 0.679245 0.597622 0.070 Uiso 1 1 calc R U . . .
C29 C 0.4349(3) 0.8261(2) 0.4966(2) 0.0519(7) Uani 1 1 d . . . . .
C30 C 0.4750(3) 0.7864(3) 0.4124(2) 0.0623(8) Uani 1 1 d . . . . .
H30 H 0.509377 0.711086 0.421108 0.075 Uiso 1 1 calc R U . . .
C31 C 0.4658(3) 0.8546(3) 0.3161(2) 0.0685(9) Uani 1 1 d . . . . .
H31 H 0.493812 0.825457 0.260955 0.082 Uiso 1 1 calc R U . . .
C32 C 0.4145(3) 0.9669(3) 0.3024(2) 0.0655(8) Uani 1 1 d . . . . .
C33 C 0.3745(3) 1.0078(3) 0.3853(2) 0.0653(8) Uani 1 1 d . . . . .
H33 H 0.341197 1.083220 0.376427 0.078 Uiso 1 1 calc R U . . .
C34 C 0.3829(3) 0.9396(3) 0.4804(2) 0.0579(7) Uani 1 1 d . . . . .
H34 H 0.353367 0.969176 0.535298 0.069 Uiso 1 1 calc R U . . .
C35 C 0.4353(5) 1.0036(4) 0.1246(3) 0.1248(17) Uani 1 1 d . . . . .
H35A H 0.536001 0.960681 0.117590 0.187 Uiso 1 1 calc R U . . .
H35B H 0.424308 1.065114 0.065802 0.187 Uiso 1 1 calc R U . . .
H35C H 0.369291 0.959149 0.131471 0.187 Uiso 1 1 calc R U . . .
N1 N 1.0984(2) 0.58712(18) 0.73488(15) 0.0502(5) Uani 1 1 d . . . . .
N2 N 1.1151(2) 0.57149(18) 0.63970(15) 0.0504(5) Uani 1 1 d . . . . .
N3 N 1.3622(2) 0.5042(2) 0.64021(16) 0.0596(6) Uani 1 1 d . . . . .
H3A H 1.345004 0.512562 0.699936 0.071 Uiso 1 1 calc R U . . .
H3B H 1.451313 0.478215 0.612428 0.071 Uiso 1 1 calc R U . . .
O1 O 0.7428(2) 0.7116(2) 1.14360(17) 0.0946(8) Uani 1 1 d . . . . .
O2 O 0.9088(2) 1.01424(18) 0.29532(16) 0.0789(6) Uani 1 1 d . . . . .
O3 O 0.2211(3) 0.7889(2) 1.15547(16) 0.0914(7) Uani 1 1 d . . . . .
O4 O 0.4751(3) 0.5901(2) 0.78148(16) 0.0848(7) Uani 1 1 d . . . . .
O5 O 0.4008(3) 1.0418(2) 0.21120(17) 0.0933(8) Uani 1 1 d . . . . .
S1 S 1.27470(8) 0.51457(6) 0.47554(5) 0.0571(2) Uani 1 1 d . . . . .
 
loop_
 _atom_site_aniso_label
 _atom_site_aniso_U_11
 _atom_site_aniso_U_22
 _atom_site_aniso_U_33
 _atom_site_aniso_U_23
 _atom_site_aniso_U_13
 _atom_site_aniso_U_12
C1 0.099(3) 0.127(4) 0.075(2) -0.054(2) -0.006(2) -0.030(3)
C2 0.0581(18) 0.086(2) 0.0592(18) -0.0337(17) 0.0008(15) -0.0172(17)
C3 0.0412(16) 0.155(4) 0.085(2) -0.064(2) 0.0061(16) -0.017(2)
C4 0.0419(15) 0.130(3) 0.069(2) -0.048(2) -0.0026(14) -0.0199(19)
C5 0.0416(14) 0.0567(18) 0.0465(15) -0.0133(12) -0.0020(11) -0.0128(13)
C6 0.0396(14) 0.076(2) 0.0564(17) -0.0252(15) -0.0006(12) -0.0134(15)
C7 0.0509(16) 0.082(2) 0.0614(18) -0.0302(16) -0.0076(14) -0.0165(16)
C8 0.0399(14) 0.0543(17) 0.0497(15) -0.0095(12) -0.0046(11) -0.0139(13)
C9 0.0463(14) 0.074(2) 0.0515(16) -0.0157(14) -0.0058(12) -0.0184(15)
C10 0.0426(14) 0.0594(18) 0.0505(15) -0.0163(13) -0.0103(11) -0.0119(14)
C11 0.0450(14) 0.0449(16) 0.0489(15) -0.0121(12) -0.0042(12) -0.0097(13)
C12 0.0408(13) 0.0559(17) 0.0470(14) -0.0195(12) -0.0065(11) -0.0109(13)
C13 0.0522(15) 0.060(2) 0.0645(17) -0.0164(14) -0.0199(13) -0.0170(15)
C14 0.0569(17) 0.063(2) 0.0692(19) -0.0174(15) -0.0282(14) -0.0082(16)
C15 0.0508(16) 0.0483(18) 0.0614(17) -0.0144(14) -0.0099(13) -0.0029(14)
C16 0.0533(17) 0.059(2) 0.0733(19) -0.0146(15) -0.0128(14) -0.0200(16)
C17 0.0498(15) 0.065(2) 0.0593(17) -0.0152(14) -0.0181(13) -0.0156(15)
C18 0.108(3) 0.096(3) 0.125(3) 0.027(3) -0.037(3) -0.046(3)
C19 0.132(3) 0.103(3) 0.053(2) -0.0122(19) -0.016(2) -0.030(3)
C20 0.0672(19) 0.072(2) 0.0532(18) -0.0152(16) -0.0124(14) -0.0170(18)
C21 0.103(3) 0.062(2) 0.064(2) -0.0168(16) -0.0164(18) -0.013(2)
C22 0.092(2) 0.058(2) 0.0553(18) -0.0085(15) -0.0168(16) -0.0141(18)
C23 0.0467(15) 0.059(2) 0.0553(17) -0.0097(14) -0.0174(12) -0.0092(14)
C24 0.0506(16) 0.060(2) 0.0611(18) -0.0117(14) -0.0153(13) -0.0059(15)
C25 0.0566(17) 0.062(2) 0.0572(18) -0.0034(14) -0.0137(14) -0.0114(16)
C26 0.0548(17) 0.062(2) 0.0598(18) -0.0121(15) -0.0174(14) -0.0095(16)
C27 0.0578(17) 0.064(2) 0.0571(18) -0.0157(15) -0.0150(14) -0.0065(15)
C28 0.0520(16) 0.0581(19) 0.0655(19) -0.0200(15) -0.0105(14) -0.0112(15)
C29 0.0443(14) 0.0553(19) 0.0579(17) -0.0189(14) -0.0078(12) -0.0120(14)
C30 0.0604(18) 0.063(2) 0.069(2) -0.0302(16) -0.0063(14) -0.0141(16)
C31 0.0661(19) 0.088(3) 0.0552(18) -0.0281(17) -0.0032(15) -0.0215(19)
C32 0.0611(18) 0.081(3) 0.0568(18) -0.0126(17) -0.0107(14) -0.0271(19)
C33 0.0693(19) 0.058(2) 0.071(2) -0.0155(16) -0.0176(16) -0.0164(17)
C34 0.0591(17) 0.062(2) 0.0566(17) -0.0225(14) -0.0084(13) -0.0147(16)
C35 0.166(4) 0.154(4) 0.054(2) -0.018(2) -0.016(2) -0.052(4)
N1 0.0443(12) 0.0594(15) 0.0439(12) -0.0172(10) -0.0055(9) -0.0070(11)
N2 0.0430(12) 0.0612(15) 0.0436(12) -0.0157(10) -0.0072(9) -0.0068(11)
N3 0.0433(12) 0.0794(18) 0.0547(14) -0.0272(12) -0.0074(10) -0.0042(13)
O1 0.0664(14) 0.154(3) 0.0773(15) -0.0691(16) 0.0036(12) -0.0200(15)
O2 0.0785(14) 0.0604(14) 0.0864(15) 0.0032(11) -0.0268(11) -0.0158(12)
O3 0.124(2) 0.0880(18) 0.0560(14) -0.0199(12) -0.0148(13) -0.0175(16)
O4 0.1079(18) 0.0635(16) 0.0735(15) -0.0198(12) -0.0271(12) 0.0032(14)
O5 0.1146(19) 0.101(2) 0.0591(14) -0.0037(13) -0.0212(13) -0.0331(16)
S1 0.0545(4) 0.0653(5) 0.0532(4) -0.0239(3) -0.0068(3) -0.0108(4)
 
_geom_special_details
;
 All esds (except the esd in the dihedral angle between two l.s. planes)
 are estimated using the full covariance matrix.  The cell esds are taken
 into account individually in the estimation of esds in distances, angles
 and torsion angles; correlations between esds in cell parameters are only
 used when they are defined by crystal symmetry.  An approximate (isotropic)
 treatment of cell esds is used for estimating esds involving l.s. planes.
;
 
loop_
 _geom_bond_atom_site_label_1
 _geom_bond_atom_site_label_2
 _geom_bond_distance
 _geom_bond_site_symmetry_2
 _geom_bond_publ_flag
C1 O1 1.415(4) . ?
C1 H1A 0.9600 . ?
C1 H1B 0.9600 . ?
C1 H1C 0.9600 . ?
C2 O1 1.365(3) . ?
C2 C3 1.368(4) . ?
C2 C7 1.377(4) . ?
C3 C4 1.378(4) . ?
C3 H3 0.9300 . ?
C4 C5 1.386(4) . ?
C4 H4 0.9300 . ?
C5 C6 1.380(4) . ?
C5 C8 1.450(3) . ?
C6 C7 1.369(3) . ?
C6 H6 0.9300 . ?
C7 H7 0.9300 . ?
C8 N1 1.294(3) . ?
C8 C9 1.506(4) . ?
C9 C10 1.538(3) . ?
C9 H9A 0.9700 . ?
C9 H9B 0.9700 . ?
C10 N2 1.471(3) . ?
C10 C12 1.510(4) . ?
C10 H10 0.9800 . ?
C11 N3 1.328(3) . ?
C11 N2 1.345(3) . ?
C11 S1 1.677(3) . ?
C12 C17 1.377(3) . ?
C12 C13 1.386(3) . ?
C13 C14 1.377(4) . ?
C13 H13 0.9300 . ?
C14 C15 1.382(4) . ?
C14 H14 0.9300 . ?
C15 O2 1.371(3) . ?
C15 C16 1.373(4) . ?
C16 C17 1.385(4) . ?
C16 H16 0.9300 . ?
C17 H17 0.9300 . ?
C18 O2 1.415(4) . ?
C18 H18A 0.9600 . ?
C18 H18B 0.9600 . ?
C18 H18C 0.9600 . ?
C19 O3 1.431(4) . ?
C19 H19A 0.9600 . ?
C19 H19B 0.9600 . ?
C19 H19C 0.9600 . ?
C20 O3 1.363(3) . ?
C20 C25 1.379(4) . ?
C20 C21 1.379(4) . ?
C21 C22 1.373(4) . ?
C21 H21 0.9300 . ?
C22 C23 1.384(4) . ?
C22 H22 0.9300 . ?
C23 C24 1.389(4) . ?
C23 C26 1.483(4) . ?
C24 C25 1.383(4) . ?
C24 H24 0.9300 . ?
C25 H25 0.9300 . ?
C26 O4 1.238(4) . ?
C26 C27 1.461(4) . ?
C27 C28 1.323(4) . ?
C27 H27 0.9300 . ?
C28 C29 1.449(4) . ?
C28 H28 0.9300 . ?
C29 C30 1.384(4) . ?
C29 C34 1.396(4) . ?
C30 C31 1.379(4) . ?
C30 H30 0.9300 . ?
C31 C32 1.386(5) . ?
C31 H31 0.9300 . ?
C32 O5 1.360(4) . ?
C32 C33 1.377(4) . ?
C33 C34 1.364(4) . ?
C33 H33 0.9300 . ?
C34 H34 0.9300 . ?
C35 O5 1.407(4) . ?
C35 H35A 0.9600 . ?
C35 H35B 0.9600 . ?
C35 H35C 0.9600 . ?
N1 N2 1.399(3) . ?
N3 H3A 0.8600 . ?
N3 H3B 0.8600 . ?
 
loop_
 _geom_angle_atom_site_label_1
 _geom_angle_atom_site_label_2
 _geom_angle_atom_site_label_3
 _geom_angle
 _geom_angle_site_symmetry_1
 _geom_angle_site_symmetry_3
 _geom_angle_publ_flag
O1 C1 H1A 109.5 . . ?
O1 C1 H1B 109.5 . . ?
H1A C1 H1B 109.5 . . ?
O1 C1 H1C 109.5 . . ?
H1A C1 H1C 109.5 . . ?
H1B C1 H1C 109.5 . . ?
O1 C2 C3 116.2(3) . . ?
O1 C2 C7 124.2(3) . . ?
C3 C2 C7 119.6(3) . . ?
C2 C3 C4 120.8(3) . . ?
C2 C3 H3 119.6 . . ?
C4 C3 H3 119.6 . . ?
C3 C4 C5 120.5(3) . . ?
C3 C4 H4 119.8 . . ?
C5 C4 H4 119.8 . . ?
C6 C5 C4 117.5(2) . . ?
C6 C5 C8 121.4(2) . . ?
C4 C5 C8 121.1(2) . . ?
C7 C6 C5 122.4(2) . . ?
C7 C6 H6 118.8 . . ?
C5 C6 H6 118.8 . . ?
C6 C7 C2 119.3(3) . . ?
C6 C7 H7 120.4 . . ?
C2 C7 H7 120.4 . . ?
N1 C8 C5 121.0(2) . . ?
N1 C8 C9 113.1(2) . . ?
C5 C8 C9 125.9(2) . . ?
C8 C9 C10 102.7(2) . . ?
C8 C9 H9A 111.2 . . ?
C10 C9 H9A 111.2 . . ?
C8 C9 H9B 111.2 . . ?
C10 C9 H9B 111.2 . . ?
H9A C9 H9B 109.1 . . ?
N2 C10 C12 113.2(2) . . ?
N2 C10 C9 100.6(2) . . ?
C12 C10 C9 112.9(2) . . ?
N2 C10 H10 109.9 . . ?
C12 C10 H10 109.9 . . ?
C9 C10 H10 109.9 . . ?
N3 C11 N2 116.2(2) . . ?
N3 C11 S1 122.83(19) . . ?
N2 C11 S1 121.0(2) . . ?
C17 C12 C13 117.8(3) . . ?
C17 C12 C10 123.4(2) . . ?
C13 C12 C10 118.7(2) . . ?
C14 C13 C12 121.2(2) . . ?
C14 C13 H13 119.4 . . ?
C12 C13 H13 119.4 . . ?
C13 C14 C15 120.0(3) . . ?
C13 C14 H14 120.0 . . ?
C15 C14 H14 120.0 . . ?
O2 C15 C16 125.2(3) . . ?
O2 C15 C14 115.2(3) . . ?
C16 C15 C14 119.6(3) . . ?
C15 C16 C17 119.7(3) . . ?
C15 C16 H16 120.1 . . ?
C17 C16 H16 120.1 . . ?
C12 C17 C16 121.5(3) . . ?
C12 C17 H17 119.2 . . ?
C16 C17 H17 119.2 . . ?
O2 C18 H18A 109.5 . . ?
O2 C18 H18B 109.5 . . ?
H18A C18 H18B 109.5 . . ?
O2 C18 H18C 109.5 . . ?
H18A C18 H18C 109.5 . . ?
H18B C18 H18C 109.5 . . ?
O3 C19 H19A 109.5 . . ?
O3 C19 H19B 109.5 . . ?
H19A C19 H19B 109.5 . . ?
O3 C19 H19C 109.5 . . ?
H19A C19 H19C 109.5 . . ?
H19B C19 H19C 109.5 . . ?
O3 C20 C25 124.8(3) . . ?
O3 C20 C21 115.9(3) . . ?
C25 C20 C21 119.2(3) . . ?
C22 C21 C20 121.1(3) . . ?
C22 C21 H21 119.4 . . ?
C20 C21 H21 119.4 . . ?
C21 C22 C23 120.7(3) . . ?
C21 C22 H22 119.6 . . ?
C23 C22 H22 119.6 . . ?
C22 C23 C24 117.6(3) . . ?
C22 C23 C26 124.1(3) . . ?
C24 C23 C26 118.3(3) . . ?
C25 C24 C23 122.0(3) . . ?
C25 C24 H24 119.0 . . ?
C23 C24 H24 119.0 . . ?
C20 C25 C24 119.3(3) . . ?
C20 C25 H25 120.4 . . ?
C24 C25 H25 120.4 . . ?
O4 C26 C27 121.1(3) . . ?
O4 C26 C23 119.0(3) . . ?
C27 C26 C23 119.9(3) . . ?
C28 C27 C26 122.5(3) . . ?
C28 C27 H27 118.8 . . ?
C26 C27 H27 118.8 . . ?
C27 C28 C29 128.6(3) . . ?
C27 C28 H28 115.7 . . ?
C29 C28 H28 115.7 . . ?
C30 C29 C34 117.0(3) . . ?
C30 C29 C28 120.3(3) . . ?
C34 C29 C28 122.7(3) . . ?
C31 C30 C29 122.3(3) . . ?
C31 C30 H30 118.8 . . ?
C29 C30 H30 118.8 . . ?
C30 C31 C32 119.3(3) . . ?
C30 C31 H31 120.3 . . ?
C32 C31 H31 120.3 . . ?
O5 C32 C33 116.5(3) . . ?
O5 C32 C31 124.4(3) . . ?
C33 C32 C31 119.1(3) . . ?
C34 C33 C32 121.1(3) . . ?
C34 C33 H33 119.5 . . ?
C32 C33 H33 119.5 . . ?
C33 C34 C29 121.2(3) . . ?
C33 C34 H34 119.4 . . ?
C29 C34 H34 119.4 . . ?
O5 C35 H35A 109.5 . . ?
O5 C35 H35B 109.5 . . ?
H35A C35 H35B 109.5 . . ?
O5 C35 H35C 109.5 . . ?
H35A C35 H35C 109.5 . . ?
H35B C35 H35C 109.5 . . ?
C8 N1 N2 107.9(2) . . ?
C11 N2 N1 119.9(2) . . ?
C11 N2 C10 127.2(2) . . ?
N1 N2 C10 112.65(19) . . ?
C11 N3 H3A 120.0 . . ?
C11 N3 H3B 120.0 . . ?
H3A N3 H3B 120.0 . . ?
C2 O1 C1 118.1(2) . . ?
C15 O2 C18 118.2(3) . . ?
C20 O3 C19 118.2(3) . . ?
C32 O5 C35 118.5(3) . . ?
 
loop_
 _geom_torsion_atom_site_label_1
 _geom_torsion_atom_site_label_2
 _geom_torsion_atom_site_label_3
 _geom_torsion_atom_site_label_4
 _geom_torsion
 _geom_torsion_site_symmetry_1
 _geom_torsion_site_symmetry_2
 _geom_torsion_site_symmetry_3
 _geom_torsion_site_symmetry_4
 _geom_torsion_publ_flag
O1 C2 C3 C4 179.0(3) . . . . ?
C7 C2 C3 C4 -1.3(6) . . . . ?
C2 C3 C4 C5 0.8(6) . . . . ?
C3 C4 C5 C6 0.4(5) . . . . ?
C3 C4 C5 C8 -179.4(3) . . . . ?
C4 C5 C6 C7 -1.2(5) . . . . ?
C8 C5 C6 C7 178.6(3) . . . . ?
C5 C6 C7 C2 0.8(5) . . . . ?
O1 C2 C7 C6 -179.8(3) . . . . ?
C3 C2 C7 C6 0.5(5) . . . . ?
C6 C5 C8 N1 3.9(4) . . . . ?
C4 C5 C8 N1 -176.2(3) . . . . ?
C6 C5 C8 C9 -177.4(3) . . . . ?
C4 C5 C8 C9 2.5(4) . . . . ?
N1 C8 C9 C10 -12.0(3) . . . . ?
C5 C8 C9 C10 169.2(2) . . . . ?
C8 C9 C10 N2 16.1(3) . . . . ?
C8 C9 C10 C12 -104.9(3) . . . . ?
N2 C10 C12 C17 -17.5(4) . . . . ?
C9 C10 C12 C17 96.0(3) . . . . ?
N2 C10 C12 C13 165.3(2) . . . . ?
C9 C10 C12 C13 -81.3(3) . . . . ?
C17 C12 C13 C14 1.4(4) . . . . ?
C10 C12 C13 C14 178.8(2) . . . . ?
C12 C13 C14 C15 -0.1(4) . . . . ?
C13 C14 C15 O2 179.3(3) . . . . ?
C13 C14 C15 C16 -1.4(4) . . . . ?
O2 C15 C16 C17 -179.3(3) . . . . ?
C14 C15 C16 C17 1.5(4) . . . . ?
C13 C12 C17 C16 -1.4(4) . . . . ?
C10 C12 C17 C16 -178.6(3) . . . . ?
C15 C16 C17 C12 -0.1(4) . . . . ?
O3 C20 C21 C22 178.5(3) . . . . ?
C25 C20 C21 C22 -1.2(5) . . . . ?
C20 C21 C22 C23 0.1(5) . . . . ?
C21 C22 C23 C24 1.6(4) . . . . ?
C21 C22 C23 C26 -178.0(3) . . . . ?
C22 C23 C24 C25 -2.3(4) . . . . ?
C26 C23 C24 C25 177.3(2) . . . . ?
O3 C20 C25 C24 -179.1(3) . . . . ?
C21 C20 C25 C24 0.5(4) . . . . ?
C23 C24 C25 C20 1.3(4) . . . . ?
C22 C23 C26 O4 173.3(3) . . . . ?
C24 C23 C26 O4 -6.4(4) . . . . ?
C22 C23 C26 C27 -6.2(4) . . . . ?
C24 C23 C26 C27 174.2(2) . . . . ?
O4 C26 C27 C28 -1.1(4) . . . . ?
C23 C26 C27 C28 178.3(2) . . . . ?
C26 C27 C28 C29 177.8(3) . . . . ?
C27 C28 C29 C30 -170.1(3) . . . . ?
C27 C28 C29 C34 10.0(4) . . . . ?
C34 C29 C30 C31 0.5(4) . . . . ?
C28 C29 C30 C31 -179.5(3) . . . . ?
C29 C30 C31 C32 -0.1(4) . . . . ?
C30 C31 C32 O5 180.0(3) . . . . ?
C30 C31 C32 C33 0.3(4) . . . . ?
O5 C32 C33 C34 179.4(3) . . . . ?
C31 C32 C33 C34 -0.9(4) . . . . ?
C32 C33 C34 C29 1.2(4) . . . . ?
C30 C29 C34 C33 -1.0(4) . . . . ?
C28 C29 C34 C33 179.0(3) . . . . ?
C5 C8 N1 N2 -179.5(2) . . . . ?
C9 C8 N1 N2 1.7(3) . . . . ?
N3 C11 N2 N1 3.0(3) . . . . ?
S1 C11 N2 N1 -178.61(18) . . . . ?
N3 C11 N2 C10 177.9(2) . . . . ?
S1 C11 N2 C10 -3.7(4) . . . . ?
C8 N1 N2 C11 -174.0(2) . . . . ?
C8 N1 N2 C10 10.5(3) . . . . ?
C12 C10 N2 C11 -71.4(3) . . . . ?
C9 C10 N2 C11 167.8(2) . . . . ?
C12 C10 N2 N1 103.8(2) . . . . ?
C9 C10 N2 N1 -17.0(3) . . . . ?
C3 C2 O1 C1 178.9(3) . . . . ?
C7 C2 O1 C1 -0.9(5) . . . . ?
C16 C15 O2 C18 7.7(5) . . . . ?
C14 C15 O2 C18 -173.1(3) . . . . ?
C25 C20 O3 C19 2.7(5) . . . . ?
C21 C20 O3 C19 -176.9(3) . . . . ?
C33 C32 O5 C35 -177.8(3) . . . . ?
C31 C32 O5 C35 2.5(5) . . . . ?
 
loop_
 _geom_hbond_atom_site_label_D 
 _geom_hbond_atom_site_label_H 
 _geom_hbond_atom_site_label_A 
 _geom_hbond_distance_DH 
 _geom_hbond_distance_HA 
 _geom_hbond_distance_DA 
 _geom_hbond_angle_DHA 
 _geom_hbond_site_symmetry_A 
 _geom_hbond_publ_flag
N3 H3A O4  0.86 2.52 3.159(3) 132.2 1_655 yes
N3 H3B S1  0.86 2.61 3.412(2) 154.8 2_866 yes
 
_refine_diff_density_max    0.174
_refine_diff_density_min   -0.246
_refine_diff_density_rms    0.042

_shelx_res_file
;
TITL bmk1962b in P-1
    shelx.res
    created by SHELXL-2018/1 at 16:37:21 on 28-Apr-2022
CELL  0.71073   9.6162  13.2978  14.2415   70.629   74.519   72.199
ZERR     2.00   0.0006   0.0011   0.0011    0.007    0.006    0.007
LATT   1
SFAC  C    H    N    O    S
UNIT  70 70 6 10 2
MERG   2
MPLA C19 C20 C21 C22 C23 C24 C25 C26 C27 C28 C29 C30 C31 C32 C33 C34 C35 O3   =
     O4 O5
mpla c20 c21 c22 c23 c24 c25
mpla c29 c30 c31 c32 c33 c34
MPLA C12 C13 C14 C15 C16 C17
MPLA 4 N1 N2 C8 C9 C10
MPLA C2 C3 C4 C5 C6 C7
EQIV $1 x+1, y, z
HTAB N3 O4_$1
EQIV $2 -x+3, -y+1, -z+1
HTAB N3 S1_$2
FMAP   2
PLAN   10
SIZE     0.079   0.105   0.389
ACTA
BOND   $H
CONF
L.S.  10
WGHT    0.059900    0.214900
FVAR       2.83153
C1    1    0.840825    0.710722    1.202591    11.00000    0.09949    0.12678 =
         0.07529   -0.05448   -0.00641   -0.03002
AFIX 137
H1A   2    0.915518    0.642905    1.210215    11.00000   -1.50000
H1B   2    0.785995    0.717666    1.268096    11.00000   -1.50000
H1C   2    0.887421    0.770994    1.169479    11.00000   -1.50000
AFIX   0
C2    1    0.803026    0.686329    1.053517    11.00000    0.05814    0.08616 =
         0.05915   -0.03366    0.00075   -0.01717
C3    1    0.704555    0.686207    0.999756    11.00000    0.04119    0.15539 =
         0.08481   -0.06448    0.00605   -0.01719
AFIX  43
H3    2    0.603269    0.701630    1.026023    11.00000   -1.20000
AFIX   0
C4    1    0.753743    0.663485    0.907099    11.00000    0.04194    0.12988 =
         0.06882   -0.04826   -0.00262   -0.01992
AFIX  43
H4    2    0.685374    0.664632    0.871051    11.00000   -1.20000
AFIX   0
C5    1    0.904389    0.638936    0.867258    11.00000    0.04158    0.05670 =
         0.04648   -0.01331   -0.00204   -0.01281
C6    1    1.001212    0.637591    0.924033    11.00000    0.03962    0.07567 =
         0.05645   -0.02516   -0.00062   -0.01342
AFIX  43
H6    2    1.102807    0.619910    0.899238    11.00000   -1.20000
AFIX   0
C7    1    0.953185    0.661332    1.015531    11.00000    0.05093    0.08202 =
         0.06143   -0.03020   -0.00759   -0.01655
AFIX  43
H7    2    1.021201    0.660593    1.051655    11.00000   -1.20000
AFIX   0
C8    1    0.957639    0.615840    0.769498    11.00000    0.03989    0.05425 =
         0.04970   -0.00947   -0.00457   -0.01391
C9    1    0.862083    0.619461    0.699597    11.00000    0.04631    0.07357 =
         0.05146   -0.01569   -0.00583   -0.01838
AFIX  23
H9A   2    0.786343    0.687717    0.688833    11.00000   -1.20000
H9B   2    0.814704    0.558380    0.726049    11.00000   -1.20000
AFIX   0
C10   1    0.974868    0.610901    0.601375    11.00000    0.04261    0.05942 =
         0.05055   -0.01629   -0.01032   -0.01195
AFIX  13
H10   2    0.961418    0.555287    0.575704    11.00000   -1.20000
AFIX   0
C11   1    1.250918    0.531485    0.590864    11.00000    0.04502    0.04487 =
         0.04893   -0.01212   -0.00418   -0.00966
C12   1    0.964830    0.718939    0.520308    11.00000    0.04076    0.05592 =
         0.04698   -0.01954   -0.00655   -0.01086
C13   1    0.855959    0.752386    0.461836    11.00000    0.05216    0.06023 =
         0.06453   -0.01644   -0.01987   -0.01697
AFIX  43
H13   2    0.792585    0.707387    0.472650    11.00000   -1.20000
AFIX   0
C14   1    0.839914    0.851016    0.388030    11.00000    0.05686    0.06301 =
         0.06917   -0.01737   -0.02816   -0.00817
AFIX  43
H14   2    0.766298    0.872055    0.349502    11.00000   -1.20000
AFIX   0
C15   1    0.933301    0.918716    0.371257    11.00000    0.05075    0.04835 =
         0.06144   -0.01435   -0.00988   -0.00291
C16   1    1.039588    0.888156    0.429985    11.00000    0.05329    0.05897 =
         0.07334   -0.01455   -0.01276   -0.02004
AFIX  43
H16   2    1.101269    0.934072    0.420199    11.00000   -1.20000
AFIX   0
C17   1    1.054545    0.788686    0.503839    11.00000    0.04977    0.06509 =
         0.05926   -0.01518   -0.01814   -0.01563
AFIX  43
H17   2    1.126873    0.768521    0.543234    11.00000   -1.20000
AFIX   0
C18   1    1.010581    1.081499    0.266447    11.00000    0.10843    0.09644 =
         0.12508    0.02731   -0.03697   -0.04578
AFIX 137
H18A  2    1.014006    1.102495    0.323958    11.00000   -1.50000
H18B  2    0.979164    1.146037    0.214052    11.00000   -1.50000
H18C  2    1.107593    1.041594    0.241743    11.00000   -1.50000
AFIX   0
C19   1    0.235885    0.705002    1.248670    11.00000    0.13190    0.10255 =
         0.05344   -0.01216   -0.01623   -0.02991
AFIX 137
H19A  2    0.175092    0.655762    1.258208    11.00000   -1.50000
H19B  2    0.204593    0.738005    1.303812    11.00000   -1.50000
H19C  2    0.337869    0.664980    1.246522    11.00000   -1.50000
AFIX   0
C20   1    0.266011    0.758393    1.067606    11.00000    0.06721    0.07169 =
         0.05321   -0.01516   -0.01241   -0.01695
C21   1    0.256237    0.842738    0.979630    11.00000    0.10251    0.06157 =
         0.06419   -0.01678   -0.01638   -0.01326
AFIX  43
H21   2    0.218289    0.914797    0.983502    11.00000   -1.20000
AFIX   0
C22   1    0.301543    0.822167    0.886476    11.00000    0.09152    0.05752 =
         0.05532   -0.00850   -0.01678   -0.01407
AFIX  43
H22   2    0.294055    0.880363    0.828185    11.00000   -1.20000
AFIX   0
C23   1    0.358243    0.715791    0.878326    11.00000    0.04675    0.05890 =
         0.05527   -0.00968   -0.01736   -0.00916
C24   1    0.363803    0.631372    0.967484    11.00000    0.05062    0.05956 =
         0.06110   -0.01168   -0.01530   -0.00594
AFIX  43
H24   2    0.398119    0.559130    0.963797    11.00000   -1.20000
AFIX   0
C25   1    0.319825    0.651532    1.061597    11.00000    0.05662    0.06240 =
         0.05718   -0.00336   -0.01367   -0.01141
AFIX  43
H25   2    0.326477    0.593653    1.120177    11.00000   -1.20000
AFIX   0
C26   1    0.413831    0.686800    0.780709    11.00000    0.05477    0.06150 =
         0.05979   -0.01213   -0.01736   -0.00945
C27   1    0.396949    0.772152    0.685569    11.00000    0.05778    0.06364 =
         0.05706   -0.01567   -0.01497   -0.00650
AFIX  43
H27   2    0.348779    0.843742    0.687872    11.00000   -1.20000
AFIX   0
C28   1    0.447628    0.751414    0.596249    11.00000    0.05195    0.05811 =
         0.06549   -0.02003   -0.01050   -0.01119
AFIX  43
H28   2    0.498134    0.679245    0.597622    11.00000   -1.20000
AFIX   0
C29   1    0.434923    0.826134    0.496628    11.00000    0.04432    0.05526 =
         0.05791   -0.01893   -0.00778   -0.01198
C30   1    0.475021    0.786401    0.412444    11.00000    0.06041    0.06313 =
         0.06908   -0.03018   -0.00632   -0.01412
AFIX  43
H30   2    0.509377    0.711086    0.421108    11.00000   -1.20000
AFIX   0
C31   1    0.465827    0.854575    0.316124    11.00000    0.06612    0.08821 =
         0.05517   -0.02807   -0.00318   -0.02150
AFIX  43
H31   2    0.493812    0.825457    0.260955    11.00000   -1.20000
AFIX   0
C32   1    0.414459    0.966912    0.302397    11.00000    0.06108    0.08102 =
         0.05685   -0.01265   -0.01066   -0.02711
C33   1    0.374474    1.007821    0.385335    11.00000    0.06932    0.05822 =
         0.07057   -0.01545   -0.01760   -0.01640
AFIX  43
H33   2    0.341197    1.083220    0.376427    11.00000   -1.20000
AFIX   0
C34   1    0.382859    0.939590    0.480359    11.00000    0.05908    0.06167 =
         0.05664   -0.02252   -0.00843   -0.01470
AFIX  43
H34   2    0.353367    0.969176    0.535298    11.00000   -1.20000
AFIX   0
C35   1    0.435335    1.003648    0.124641    11.00000    0.16625    0.15373 =
         0.05399   -0.01812   -0.01649   -0.05217
AFIX 137
H35A  2    0.536001    0.960681    0.117590    11.00000   -1.50000
H35B  2    0.424308    1.065114    0.065802    11.00000   -1.50000
H35C  2    0.369291    0.959149    0.131471    11.00000   -1.50000
AFIX   0
N1    3    1.098411    0.587118    0.734881    11.00000    0.04433    0.05944 =
         0.04391   -0.01720   -0.00554   -0.00701
N2    3    1.115117    0.571487    0.639705    11.00000    0.04301    0.06116 =
         0.04357   -0.01574   -0.00716   -0.00680
N3    3    1.362151    0.504216    0.640209    11.00000    0.04327    0.07936 =
         0.05469   -0.02724   -0.00744   -0.00422
AFIX  93
H3A   2    1.345004    0.512562    0.699936    11.00000   -1.20000
H3B   2    1.451313    0.478215    0.612428    11.00000   -1.20000
AFIX   0
O1    4    0.742849    0.711606    1.143600    11.00000    0.06643    0.15449 =
         0.07732   -0.06910    0.00358   -0.02004
O2    4    0.908845    1.014239    0.295320    11.00000    0.07852    0.06039 =
         0.08636    0.00321   -0.02680   -0.01577
O3    4    0.221134    0.788851    1.155467    11.00000    0.12379    0.08796 =
         0.05598   -0.01989   -0.01484   -0.01747
O4    4    0.475133    0.590075    0.781482    11.00000    0.10794    0.06350 =
         0.07350   -0.01985   -0.02710    0.00322
O5    4    0.400760    1.041752    0.211196    11.00000    0.11457    0.10064 =
         0.05906   -0.00375   -0.02118   -0.03308
S1    5    1.274701    0.514571    0.475538    11.00000    0.05452    0.06525 =
         0.05320   -0.02388   -0.00677   -0.01077
HKLF    4


REM  bmk1962b in P-1
REM R1 =  0.0633 for    3716 Fo > 4sig(Fo)  and  0.1434 for all    7698 data
REM    401 parameters refined using      0 restraints

END

WGHT      0.0596      0.2177

REM Highest difference peak  0.174,  deepest hole -0.246,  1-sigma level  0.042
Q1    1   1.3993  0.4792  0.5174  11.00000  0.05    0.17
Q2    1   0.2322  0.9692  0.5424  11.00000  0.05    0.17
Q3    1   0.8215  0.8152  1.1465  11.00000  0.05    0.16
Q4    1   1.1608  0.5155  0.6265  11.00000  0.05    0.16
Q5    1   1.0485  0.4824  0.5238  11.00000  0.05    0.16
Q6    1   0.6771  0.6127  0.8855  11.00000  0.05    0.16
Q7    1   1.0398  0.9843  0.4577  11.00000  0.05    0.16
Q8    1   0.7402  0.7316  1.0081  11.00000  0.05    0.15
Q9    1   0.5456  0.6627  0.8749  11.00000  0.05    0.15
Q10   1   0.7484  0.6154  0.7321  11.00000  0.05    0.15
;
_shelx_res_checksum   83656

_shelx_hkl_file
;
   0   0  -3 1617.51 93.9374   2
   0   0   3 1465.54 89.5570   2
   0   0   3 1434.46 94.8807   6
   0   0  -3 1278.68 81.5178   3
   0   0  -4 3562.29 155.549   3
   0   0   4 3822.49 163.462   2
   0   0  -4 3886.82 162.865   2
   0   0   4 3679.56 173.518   6
   0   0  -4 3559.18 170.955   6
   0   0   5 1945.40 133.946   2
   0   0   5 1955.28 145.221   6
   0   0  -5 2147.12 134.662   2
   0   0  -5 2117.79 144.482   6
   0   0  -5 2023.22 133.592   3
   0   0  -6 159.698 44.6008   2
   0   0  -6 196.720 49.4019   3
   0   0   6 156.738 49.2359   6
   0   0   7 798.233 111.949   6
   0   0  -7 720.003 96.5173   3
   0   0  -8 6021.46 312.711   6
   0   0  -8 6348.84 306.122   3
   0   0   8 5908.34 330.074   6
   0   0   9 644.541 114.570   6
   0   0  -9 654.066 104.390   3
   0   0  -9 635.817 101.348   2
   0   0  -9 697.248 114.655   6
   0   0 -10 1430.05 168.560   3
   0   0 -10 1343.66 156.668   2
   0   0  10 1378.48 185.686   6
   0   0 -11 1990.06 200.531   2
   0   0 -12 556.418 109.684   2
   0   0 -13 341.472 91.0038   2
   0   0 -14 3.00718 19.1925   2
   0   0 -15 124.558 71.1256   2
   0   0 -16 63.6634 41.4856   2
   0   0 -17 198.132 91.1649   2
   0   1 -17 333.592 111.138   2
   0   1 -16 119.218 67.2210   2
   0   1 -15 113.747 52.7044   2
   0   1 -14-38.3859 26.5597   2
   0   1 -13-83.9878 47.2233   2
   0   1 -12-11.5303 36.7006   2
   0   1 -11 1031.85 144.703   2
   0   1 -11 1147.57 164.377   6
   0   1 -10 3647.01 254.715   2
   0   1 -10 3749.56 281.137   3
   0   1 -10 3275.54 264.738   6
   0   1  -9 164.225 61.1942   3
   0   1  -9 148.187 56.1719   6
   0   1  -9 139.242 50.7816   2
   0  -1   9 148.508 60.2909   6
   0   1  -8 4062.66 253.713   3
   0   1  -8 3715.15 250.433   6
   0  -1   8 3985.68 288.121   6
   0   1  -8 3944.54 230.489   2
   0   1  -7 9.48722 13.7965   3
   0  -1   7 7.70964 15.3592   6
   0   1  -6 301.857 60.6542   3
   0   1  -6 252.704 53.2667   2
   0  -1   6 287.215 69.0205   6
   0   1  -5 1038.85 93.8166   2
   0   1  -5 913.222 92.6427   3
   0  -1   5 1034.70 95.3793   3
   0   1  -5 955.470 100.336   6
   0  -1   5 1065.28 118.792   6
   0   1  -4 36.6053 22.5134   2
   0   1  -4 60.5510 25.5977   6
   0   1  -4 19.9840 12.2142   3
   0  -1   4 28.5740 18.4730   6
   0  -1   4 66.8404 23.9334   3
   0   1  -3 1264.72 87.0117   3
   0   1  -3 1540.00 105.178   6
   0  -1   3 1465.87 87.4613   3
   0  -1   3 1490.40 111.840   6
   0  -1   2 6464.95 155.518   3
   0   1  -2 6253.33 163.619   3
   0  -1   2 6479.82 205.476   6
   0   1   3 5534.42 165.116   2
   0   1   3 5510.79 145.327   1
   0   1   4 12935.5 318.465   6
   0   1   4 13249.2 295.162   2
   0   1   5 683.703 76.7549   2
   0   1   5 605.441 77.3752   6
   0  -1  -5 614.319 75.0168   3
   0  -1  -6 2282.60 158.283   3
   0   1   6 2240.28 163.534   6
   0   1   6 2266.07 151.755   2
   0  -1  -7 15521.5 442.565   3
   0   1   7 16084.9 442.803   2
   0   1   7 15877.7 478.138   6
   0  -1  -8 125.232 44.6336   3
   0   1   8 143.918 46.4862   2
   0   1   8 126.152 41.5224   6
   0   1   9 252.581 71.6550   6
   0   1   9 216.521 60.7639   2
   0  -1  -9 232.375 63.9053   3
   0  -1  -9 231.887 64.5407   2
   0  -1 -10-10.3500 34.0482   2
   0   1  10-15.2683 22.3136   6
   0  -1 -11 2889.87 242.407   2
   0   1  11 2800.90 215.194   1
   0  -1 -12 193.034 63.0769   2
   0  -1 -13 130.854 60.0276   2
   0  -1 -14-4.23335 32.1734   2
   0  -1 -15 283.472 96.7387   2
   0  -1 -16 429.682 120.289   2
   0  -1 -17 114.237 76.0024   2
   0   2 -16 28.9890 38.3162   2
   0   2 -15 47.1421 40.4595   2
   0   2 -14 84.4700 50.2400   2
   0   2 -13-6.51802 28.7698   6
   0   2 -13 15.7386 13.7931   2
   0   2 -12 175.682 76.5349   6
   0   2 -12 163.676 55.7354   2
   0   2 -11 383.330 97.0521   6
   0   2 -11 337.242 83.1622   2
   0   2 -10 9.38512 24.6131   3
   0   2 -10 29.4817 22.5074   2
   0   2 -10 11.8769 22.2119   6
   0   2  -9 78.1855 40.1833   6
   0  -2   9 209.404 81.5777   6
   0   2  -9 22.0017 16.7189   2
   0   2  -9 57.0339 45.6640   3
   0   2  -8 266.442 68.7920   6
   0  -2   8 310.436 88.5415   6
   0   2  -8 261.098 59.7833   2
   0   2  -8 354.973 80.7223   3
   0   2  -7 221.642 60.3375   3
   0  -2   7 173.529 61.7079   6
   0   2  -6-2.24796 13.1402   2
   0   2  -6 19.1652 23.9910   3
   0  -2   6-4.25149 20.3972   3
   0  -2   6 4.89426 25.6708   6
   0   2  -5 901.713 107.537   6
   0  -2   5 845.396 87.5520   3
   0   2  -5 915.904 90.9404   2
   0   2  -5 866.651 99.6568   3
   0  -2   5 1005.04 127.929   6
   0   2  -4 1456.40 117.641   3
   0   2  -4 1605.86 133.680   6
   0  -2   4 1514.69 146.963   6
   0  -2   4 1524.87 105.286   3
   0   2  -3 109.502 29.3982   3
   0  -2   3 158.007 33.8294   3
   0   2  -3 167.417 46.6025   6
   0  -2   3 169.375 46.5276   6
   0  -2   2 206.812 47.7379   6
   0  -2   2 267.859 57.8863   5
   0  -2   2 211.395 34.9459   3
   0   2  -2 236.165 49.7907   6
   0  -2   1 162401. 1297.08   5
   0   2  -1 165966. 1231.47   5
   0   2   2 66314.7 558.396   2
   0   2   3 27490.6 399.060   2
   0   2   3 26028.9 330.284   1
   0   2   4 816.712 64.6551   1
   0   2   4 916.660 79.0433   2
   0   2   5 799.870 82.8127   2
   0   2   5 887.998 76.5763   1
   0   2   6 321.863 51.4819   1
   0   2   6 299.690 55.9505   2
   0   2   6 344.412 66.5162   6
   0   2   7 12850.2 352.070   1
   0   2   7 13076.5 429.117   6
   0   2   7 12992.8 391.234   2
   0  -2  -8 99.7621 41.8000   3
   0   2   8 80.2529 29.0576   1
   0   2   8 102.572 41.7415   6
   0   2   8 99.4404 37.5833   2
   0   2   9 252.495 64.6539   2
   0  -2  -9 255.089 65.8689   3
   0   2   9 226.070 66.0382   6
   0   2  10 27.1431 26.6100   1
   0  -2 -10 33.9266 30.7465   2
   0   2  10 41.7630 26.6009   2
   0   2  10 40.1890 43.3174   6
   0  -2 -10 57.4454 41.6940   3
   0   2  11 1412.54 155.664   1
   0  -2 -11 1643.56 186.261   2
   0  -2 -12 2906.80 258.565   2
   0   2  12 2408.90 212.801   1
   0  -2 -13 72.1082 46.5215   2
   0  -2 -14-39.2278 21.8780   2
   0  -2 -15 36.0853 24.6966   2
   0  -2 -16 300.335 103.329   2
   0  -2 -17 54.3479 56.1435   2
   0   3 -16 86.9043 55.9267   2
   0   3 -15 29.7783 37.2472   2
   0   3 -14 178.887 75.1545   6
   0   3 -14 129.346 65.9370   2
   0   3 -13 59.2769 43.1686   2
   0   3 -13 41.9388 38.6033   6
   0   3 -12 266.578 77.2976   2
   0   3 -12 214.841 79.4858   6
   0   3 -11 813.532 126.330   2
   0   3 -11 807.641 145.993   6
   0   3 -10 58.1784 43.1293   3
   0   3 -10 44.0246 32.7846   2
   0   3 -10-31.2805 35.8510   6
   0  -3   9 334.191 105.284   6
   0   3  -9 383.004 94.5266   3
   0   3  -9 403.449 91.0933   6
   0   3  -9 428.696 86.2326   2
   0   3  -8 35.6685 29.2754   6
   0   3  -8 40.9656 28.3973   3
   0  -3   8 111.797 52.2209   3
   0  -3   8 85.5684 57.1841   6
   0   3  -8 65.7534 32.9405   2
   0  -3   7 242.636 83.3358   6
   0   3  -7 172.675 55.6776   3
   0   3  -7 144.901 46.3702   6
   0  -3   6 202.055 49.9913   3
   0   3  -6 145.033 47.8939   3
   0  -3   6 285.530 89.2956   6
   0   3  -5 3260.94 209.027   3
   0  -3   5 3422.29 269.049   6
   0  -3   5 3347.92 181.707   3
   0  -3   4 622.612 119.438   5
   0  -3   4 626.163 109.653   6
   0   3  -4 563.706 93.4513   6
   0  -3   4 610.086 72.2624   3
   0  -3   3 1066.35 92.0585   3
   0  -3   3 1112.70 140.023   6
   0   3  -3 1073.22 121.328   6
   0  -3   3 1138.24 144.872   5
   0  -3   2 452.224 84.6651   5
   0   3  -2 519.353 84.7307   5
   0  -3   2 477.203 114.790   4
   0   3  -2 513.768 85.5971   6
   0   3  -1 228761. 1755.59   5
   0  -3   1 231979. 1811.72   5
   0   3   0 24884.8 758.373   4
   0  -3   0 26469.8 591.471   5
   0  -3   0 28956.2 864.135   4
   0   3   0 25607.8 562.203   5
   0  -3  -1 5590.44 184.492   2
   0   3   1 5678.53 183.465   2
   0   3   1 5902.71 367.680   4
   0   3   2 52495.5 586.254   2
   0  -3  -2 51687.1 606.319   2
   0  -3  -3 15272.1 252.781   1
   0   3   3 14881.5 325.590   2
   0  -3  -3 15779.4 350.142   2
   0  -3  -4 3246.99 122.442   1
   0   3   4 3168.94 159.122   2
   0   3   5 1754.87 127.250   2
   0  -3  -5 1909.49 101.941   1
   0   3   5 1731.20 109.762   1
   0   3   6 25500.0 516.555   2
   0   3   6 25018.2 455.896   1
   0   3   7 3052.09 191.728   2
   0   3   7 3070.15 172.814   1
   0   3   8 2770.34 178.074   1
   0   3   8 3133.18 232.077   6
   0   3   8 2829.01 197.508   2
   0  -3  -9 486.859 95.6188   3
   0   3   9 395.374 71.9713   1
   0   3   9 407.713 79.4292   2
   0   3   9 414.802 90.0545   6
   0   3  10-7.12863 17.3135   2
   0  -3 -10 21.5386 28.2662   3
   0   3  10-3.02678 18.7494   6
   0  -3 -10-29.5640 44.1512   2
   0  -3 -11 259.685 74.1898   2
   0   3  11 369.976 81.7141   1
   0   3  12 876.595 129.831   1
   0  -3 -12 1112.40 168.905   2
   0   3  13 952.807 143.941   1
   0  -3 -13 1173.79 180.794   2
   0  -3 -14 126.839 60.5368   2
   0  -3 -15-28.0088 52.4478   2
   0  -3 -16 68.5095 51.3247   2
   0  -3 -17 12.5021 41.6186   2
   0   4 -16-106.337 61.4611   2
   0   4 -15 131.770 67.5714   2
   0   4 -15 151.371 72.8613   6
   0   4 -14 71.8382 53.7597   6
   0   4 -14 79.8310 54.9937   2
   0   4 -13 80.3366 59.2713   6
   0   4 -13 21.9299 27.2137   2
   0   4 -12 316.488 85.5639   2
   0   4 -12 191.965 78.1173   6
   0   4 -11 93.2968 44.5084   2
   0   4 -11 105.608 57.4247   6
   0   4 -10-0.35730 24.1158   6
   0   4 -10-36.9257 29.0715   2
   0  -4   9 440.577 90.4998   3
   0   4  -9 377.006 95.0888   6
   0   4  -9 362.170 80.6123   2
   0   4  -8 114.719 52.1153   6
   0  -4   8 244.801 111.871   5
   0   4  -8 134.682 42.4260   2
   0  -4   8 246.726 64.4413   3
   0  -4   8 134.863 68.7815   6
   0   4  -7 60.0509 45.6310   6
   0   4  -7 10.5383 20.9447   2
   0  -4   7 100.272 71.4464   5
   0  -4   7 34.3955 26.8173   6
   0  -4   6 93.2648 62.3437   5
   0   4  -6 130.056 48.7497   6
   0  -4   6 121.130 65.1098   6
   0  -4   5 5121.74 237.341   3
   0  -4   5 4916.38 360.442   6
   0  -4   5 4830.19 378.142   5
   0   4  -4 2607.87 212.859   6
   0  -4   4 2768.49 271.246   5
   0  -4   4 2691.25 163.048   3
   0  -4   3 12175.9 800.541   4
   0   4  -3 11713.0 454.090   6
   0  -4   3 11085.6 323.521   3
   0  -4   3 11668.6 528.228   5
   0  -4   2 6852.73 379.956   5
   0  -4   2 6420.30 516.309   4
   0   4  -2 7300.02 367.095   5
   0   4  -2 6850.36 346.034   6
   0   4  -1 46750.3 1359.05   4
   0  -4   1 43795.2 920.676   5
   0  -4   1 42589.3 1263.39   4
   0   4  -1 43539.6 875.408   5
   0  -4   0 5352.53 431.677   4
   0   4   0 4411.03 375.858   4
   0   4   0 4574.50 274.212   5
   0   4   0 4204.66 180.434   2
   0  -4   0 4794.34 294.954   5
   0   4   1 14878.9 682.441   4
   0   4   1 13741.0 464.043   5
   0   4   1 13804.4 328.891   2
   0  -4  -1 14544.8 332.836   2
   0   4   2 14.1043 12.1521   2
   0  -4  -2 48.9684 26.0412   2
   0  -4  -3 17036.9 403.961   2
   0   4   3 16864.3 388.923   2
   0   4   4 1219.11 108.933   2
   0  -4  -4 1460.54 92.2370   1
   0  -4  -4 1466.85 128.077   2
   0  -4  -5 1336.57 89.1473   1
   0   4   5 1347.04 118.828   2
   0  -4  -6 15401.5 319.043   1
   0   4   6 15072.9 355.942   1
   0   4   6 14943.2 417.392   2
   0   4   7-2.98909 16.1684   2
   0   4   7 4.03907 16.9792   1
   0   4   8 1529.21 133.148   1
   0   4   8 1338.75 138.590   2
   0   4   9-14.1913 23.6487   2
   0   4   9 34.4052 25.5091   1
   0   4   9 1.40441 18.6423   6
   0  -4 -10 81.0497 40.7637   2
   0   4  10 164.232 60.8233   6
   0   4  10 144.964 50.9810   2
   0  -4 -11 59.6242 37.1991   2
   0   4  11 159.466 58.3276   1
   0  -4 -12 21.6508 26.7847   2
   0   4  12 64.9283 30.5520   1
   0  -4 -13 40.5579 34.0142   2
   0   4  13 42.3066 34.0337   1
   0  -4 -14-2.13034 24.3846   2
   0  -4 -15 112.555 62.3042   2
   0  -4 -16 155.598 79.2623   2
   0  -4 -17 467.463 139.990   2
   0   5 -15 63.5722 46.9754   2
   0   5 -14 203.602 89.4427   6
   0   5 -14 9.27115 34.4449   2
   0   5 -13 4.03707 21.1250   2
   0   5 -13-13.5674 26.5084   6
   0   5 -12 13.0921 30.4139   2
   0   5 -12-15.7478 40.6311   6
   0   5 -11 453.085 99.4974   2
   0   5 -11 500.831 124.608   6
   0   5 -10 531.583 100.694   2
   0   5 -10 557.361 128.404   6
   0  -5   9 674.324 113.628   3
   0   5  -9 703.924 135.285   6
   0   5  -9 690.975 115.465   2
   0   5  -8 178.213 72.1783   6
   0   5  -8 104.042 40.3343   2
   0  -5   8 146.226 54.2848   3
   0  -5   7-0.30686 19.0719   3
   0  -5   7-40.9931 66.3833   6
   0   5  -7 9.75005 17.8381   6
   0  -5   7-38.9732 46.1566   5
   0   5  -6 726.406 127.185   6
   0  -5   6 931.842 186.454   5
   0   5  -5 377.484 95.3995   6
   0  -5   5 330.829 110.779   5
   0  -5   5 348.271 65.3191   3
   0  -5   4 230.920 127.185   4
   0  -5   4 286.698 60.0841   3
   0  -5   4 348.316 106.158   5
   0  -5   3 121.679 58.2430   5
   0  -5   3 71.2982 75.0481   4
   0  -5   3 123.383 38.0730   3
   0   5  -2 29303.5 786.849   6
   0  -5   2 30066.9 1230.75   4
   0  -5   2 28450.1 851.837   5
   0   5  -2 30991.3 833.989   5
   0   5  -1 2955.61 252.941   5
   0  -5   1 2883.76 265.921   5
   0  -5   1 3039.90 382.078   4
   0   5  -1 3029.16 370.092   4
   0   5   0 297.494 82.9919   5
   0  -5   0 254.517 79.1889   5
   0   5   0 339.754 124.349   4
   0  -5   0 488.861 155.813   4
   0   5   0 269.780 53.0616   2
   0   5   1 19.5830 13.0965   2
   0   5   1-75.6916 98.2195   4
   0   5   1-13.9078 47.5016   5
   0   5   2-4.51747 20.5560   2
   0  -5  -2 41.3121 21.7498   2
   0   5   2 104.912 88.1553   4
   0  -5  -3 7445.91 292.873   2
   0   5   3 7076.62 280.212   2
   0   5   4 1213.03 117.318   2
   0  -5  -4 1289.31 126.332   2
   0  -5  -5 475.683 64.5788   1
   0   5   5 239.152 57.9496   2
   0   5   6 12017.2 395.395   2
   0  -5  -6 11515.5 292.150   1
   0  -5  -7 2921.21 152.071   1
   0   5   7 2766.49 197.705   2
   0   5   8 1428.32 147.980   2
   0  -5  -9 74.6944 37.7643   2
   0   5   9 56.1964 24.3811   1
   0   5   9 9.04635 15.9314   2
   0  -5 -10 85.1864 42.9087   2
   0   5  10 140.317 60.5654   6
   0   5  10 124.262 44.7045   1
   0  -5 -11 201.266 60.9289   2
   0  -5 -12 20.6751 28.4416   2
   0   5  12 56.2847 34.7742   1
   0   5  13 48.9234 36.8030   1
   0  -5 -13 39.0962 39.6178   2
   0  -5 -14 121.360 58.4846   2
   0   5  14 65.9271 37.6256   1
   0  -5 -15 30.0523 56.7614   2
   0  -5 -16 0.26178 22.7832   2
   0  -5 -17 19.0836 59.9114   2
   0   6 -15 3.88759 17.9258   2
   0   6 -14 7.97458 29.1013   6
   0   6 -14 17.5736 26.7267   2
   0   6 -13 31.9972 42.9434   6
   0   6 -13-0.19113 13.9442   2
   0   6 -12 131.679 66.7820   2
   0   6 -12 124.226 61.3799   6
   0   6 -11 15.9505 26.1766   2
   0   6 -11-21.2810 40.3618   6
   0   6 -10 379.803 88.5005   2
   0   6 -10 303.009 96.5388   6
   0   6  -9 12.4951 39.4722   6
   0   6  -9 21.5863 20.8105   2
   0  -6   9-14.3334 30.8173   3
   0   6  -8-13.2863 30.2605   2
   0   6  -8 72.7959 49.7427   6
   0  -6   8 21.1176 19.0841   3
   0  -6   7-25.8279 23.9160   3
   0   6  -7 26.3612 27.9665   6
   0  -6   7-7.14467 45.3409   5
   0  -6   6 1198.58 229.422   5
   0   6  -6 1090.04 168.058   6
   0  -6   6 691.314 261.740   4
   0  -6   5-18.4056 47.0639   5
   0   6  -5-9.37497 20.0929   6
   0  -6   5 25.0483 47.4535   4
   0  -6   4 152.271 73.5764   5
   0  -6   4-67.5191 79.8021   4
   0   6  -4 96.4862 55.4518   6
   0  -6   4 126.192 42.7244   3
   0  -6   3 5086.73 421.924   5
   0  -6   3 3860.77 227.148   3
   0  -6   2 3881.50 483.089   4
   0   6  -2 3884.50 322.595   5
   0  -6   2 4068.41 359.996   5
   0   6  -1 12104.2 798.073   4
   0  -6   1 12134.2 600.506   5
   0   6  -1 12334.2 563.113   5
   0  -6   1 12607.4 858.368   4
   0   6   0 3260.78 284.312   5
   0   6   0 3202.37 372.979   4
   0   6   0 3290.89 196.844   2
   0  -6   0 3508.59 430.106   4
   0  -6   0 3306.31 305.168   5
   0   6   1 382.305 140.425   4
   0   6   1 493.212 77.1784   2
   0   6   1 546.497 112.873   5
   0   6   2 6314.26 385.969   5
   0  -6  -2 6513.17 282.673   2
   0   6   2 6374.53 549.954   4
   0   6   2 6514.62 283.939   2
   0  -6  -3 2013.44 166.879   2
   0   6   3 2031.49 163.378   2
   0  -6  -4-24.4153 29.6274   2
   0   6   4-1.72586 11.2322   2
   0  -6  -5 6849.26 325.332   2
   0   6   5 6842.71 306.780   2
   0   6   6 3445.59 226.740   2
   0  -6  -6 4084.84 261.125   2
   0  -6  -6 4421.80 198.024   1
   0  -6  -7 100.934 26.2532   1
   0   6   7 113.879 42.0311   2
   0  -6  -8 1788.49 187.761   2
   0   6   8 1642.96 166.820   2
   0  -6  -8 1538.39 118.369   1
   0   6   9 305.846 78.4432   2
   0  -6  -9 652.359 121.374   2
   0  -6 -10 211.892 66.4994   2
   0  -6 -11 568.105 121.058   2
   0   6  12 218.311 63.4670   1
   0  -6 -12 202.117 70.8668   2
   0  -6 -13 2.79149 32.9997   2
   0   6  13 121.682 57.4706   1
   0  -6 -14-12.8886 29.3146   2
   0   6  14 84.0518 46.0765   1
   0  -6 -15 129.614 60.9605   2
   0  -6 -16 40.1405 43.4200   2
   0  -6 -17-67.7666 57.8403   2
   0   7 -15 59.1599 45.6053   2
   0   7 -14 100.051 49.4992   2
   0   7 -13 139.290 63.9642   2
   0   7 -13 195.950 95.0813   6
   0   7 -12 22.8127 34.8308   6
   0   7 -12-26.6014 29.2543   2
   0   7 -11-19.3291 30.9495   6
   0   7 -11-15.7015 23.0927   2
   0  -7  10 190.973 73.2927   3
   0   7 -10 214.794 73.5064   2
   0   7 -10 149.866 71.5051   6
   0   7  -9-10.3254 20.5911   2
   0   7  -9-18.9824 35.5584   6
   0  -7   9-32.6225 27.2131   3
   0   7  -8 3.00420 38.4886   6
   0  -7   8-2.06783 27.4708   3
   0  -7   7 5.52409 16.9446   3
   0   7  -7 104.907 65.1903   6
   0  -7   6 12.8105 22.8837   3
   0  -7   6 43.1992 49.5259   5
   0  -7   5-16.0492 37.8696   5
   0  -7   5-97.3531 96.0658   4
   0   7  -5-59.9902 31.9502   6
   0  -7   4 290.226 113.274   5
   0   7  -4 260.004 91.1588   6
   0  -7   4 268.172 144.074   4
   0   7  -3 1659.33 220.453   6
   0  -7   3 1959.63 275.789   5
   0   7  -3 1877.81 247.431   5
   0  -7   3 1875.44 374.660   4
   0  -7   2 2786.39 445.166   4
   0   7  -2 3020.27 299.197   5
   0  -7   2 2701.29 315.751   5
   0   7  -2 2338.07 257.865   6
   0   7  -1 78.4595 33.4984   2
   0  -7   1 53.8413 55.8425   5
   0   7  -1 149.537 79.0351   5
   0  -7   1 88.1322 75.0081   4
   0   7   0 1226.01 192.805   5
   0  -7   0 1147.21 275.528   4
   0   7   0 987.756 115.761   2
   0   7   1 1241.03 131.631   2
   0   7   1 1285.16 187.645   5
   0   7   2 10222.8 381.794   2
   0   7   2 10303.8 537.934   5
   0  -7  -3 26.4639 32.5233   2
   0   7   3 8.01302 16.1554   2
   0  -7  -4 62.9353 37.8315   2
   0   7   4 24.2498 19.5532   2
   0   7   5 3464.16 232.983   2
   0  -7  -5 3535.88 247.586   2
   0   7   6 499.444 89.4389   2
   0  -7  -6 362.621 80.2777   2
   0  -7  -6 422.335 64.6411   1
   0  -7  -7 4436.90 210.830   1
   0   7   7 3672.38 253.359   2
   0  -7  -7 4617.46 303.566   2
   0   7   8 658.068 110.039   2
   0  -7  -8 723.127 125.186   2
   0  -7  -8 643.640 79.3386   1
   0   7   9 2252.92 211.530   2
   0  -7  -9 2621.19 163.897   1
   0  -7  -9 2528.42 240.395   2
   0  -7 -10 172.675 59.1212   2
   0  -7 -11 204.102 74.9243   2
   0  -7 -12 2226.65 259.698   2
   0  -7 -13 5.24063 24.4588   2
   0  -7 -14 167.882 87.2797   2
   0  -7 -15 46.3854 26.6147   2
   0  -7 -16 11.0890 32.2302   2
   0  -7 -17-49.7822 53.3742   2
   0   8 -14 57.4228 44.4883   2
   0   8 -13 9.54232 27.4361   2
   0   8 -12 0.19168 21.6282   2
   0   8 -12 77.6734 62.8170   6
   0   8 -11-11.6233 20.9885   2
   0   8 -11-10.1549 27.7363   6
   0   8 -10 108.300 64.7301   6
   0   8 -10-28.1235 29.3547   2
   0  -8  10 46.9966 42.1382   3
   0  -8   9 174.351 63.8132   3
   0   8  -9 21.2924 23.7808   2
   0   8  -9 168.939 79.1079   6
   0  -8   8 423.265 92.1643   3
   0   8  -8 569.614 141.279   6
   0  -8   7 251.538 67.8591   3
   0   8  -7 337.395 106.647   6
   0   8  -6-11.5301 33.5853   6
   0  -8   6 10.4658 21.7491   3
   0   8  -5 69.7421 52.9055   6
   0  -8   5 114.010 60.9515   5
   0  -8   5 125.720 45.0163   3
   0  -8   4 2177.40 326.557   5
   0  -8   4 3012.21 527.061   4
   0   8  -4 3035.88 315.666   6
   0  -8   3 628.189 173.478   5
   0   8  -3 722.509 159.542   6
   0   8  -3 832.545 180.230   5
   0  -8   3 531.727 222.441   4
   0  -8   2 602.815 226.796   4
   0   8  -2 774.397 158.429   6
   0  -8   2 1009.68 208.963   5
   0   8  -2 887.637 176.982   5
   0  -8   1 154.524 87.4881   5
   0   8  -1-51.2461 77.5431   4
   0  -8   1-59.2053 105.327   4
   0   8  -1 23.9245 13.9939   2
   0   8  -1-80.2806 69.7602   5
   0   8   0 1843.98 172.391   2
   0   8   0 2095.01 263.844   5
   0  -8   0 2446.16 410.646   4
   0   8   0 1915.11 340.479   4
   0   8   1 4740.37 388.857   5
   0   8   1 4984.22 281.615   2
   0   8   2 158.034 44.4778   5
   0   8   2 287.814 68.5196   2
   0  -8  -3-0.11732 33.5706   2
   0   8   3 63.7713 52.0013   5
   0   8   3 44.6240 27.8144   2
   0   8   4 104.527 74.4110   4
   0   8   4 104.531 41.9088   2
   0  -8  -4 53.5002 34.4007   2
   0   8   5 4494.55 281.489   2
   0  -8  -5 4561.40 300.920   2
   0  -8  -6 591.945 110.285   2
   0   8   6 601.344 104.805   2
   0   8   7-0.79685 17.4084   2
   0  -8  -7 3.87878 16.0774   1
   0  -8  -7-4.51132 30.5486   2
   0  -8  -8 1024.04 157.689   2
   0   8   8 480.842 101.372   2
   0  -8  -8 927.411 103.665   1
   0  -8  -9 2378.02 164.255   1
   0  -8  -9 2534.47 248.524   2
   0  -8 -10 284.023 92.4509   2
   0  -8 -11 606.666 130.285   2
   0  -8 -12 404.611 113.142   2
   0  -8 -13 106.541 62.8093   2
   0  -8 -14 20.1450 43.8080   2
   0  -8 -15-4.82224 28.2039   2
   0  -8 -16-39.2462 44.5726   2
   0   9 -13-6.27316 16.8668   2
   0   9 -12 62.3466 44.7254   2
   0   9 -11 36.5441 41.4113   6
   0   9 -11-16.1834 23.1094   2
   0   9 -10 84.8625 46.9379   2
   0   9 -10 5.26463 40.9655   6
   0  -9  10 47.2356 28.0564   3
   0  -9   9 199.178 69.6683   3
   0   9  -9 78.6526 67.4626   6
   0   9  -9 188.557 69.5649   2
   0  -9   8 24.8780 24.7989   3
   0   9  -8 19.5622 55.4752   6
   0  -9   7 14.4872 24.8562   3
   0   9  -7 47.4089 29.4632   6
   0   9  -6 2.99091 45.8890   6
   0  -9   6 7.31029 33.5557   3
   0  -9   5 18.0421 18.2801   3
   0   9  -5 22.9534 26.1381   6
   0  -9   4 547.901 168.862   5
   0   9  -4 548.041 143.091   6
   0  -9   4 707.484 114.374   3
   0   9  -3 8757.29 6012.43   5
   0  -9   3 9011.58 9618.79   4
   0   9  -3 8225.07 5490.67   6
   0   9  -2 127.641 61.0502   2
   0  -9   2-89.8018 133.384   4
   0   9  -2-60.1243 58.6551   5
   0  -9   2 49.0895 81.8374   5
   0   9  -2-77.3522 91.2925   6
   0  -9   1 484.709 149.381   5
   0  -9   1 356.431 152.349   4
   0   9  -1 451.255 90.1326   2
   0   9  -1 709.530 256.329   4
   0   9  -1 416.148 131.079   5
   0   9   0 1259.92 151.413   2
   0   9   0 2008.15 373.024   4
   0   9   0 1948.10 269.515   5
   0   9   1 284.694 133.918   4
   0   9   1 256.284 91.4700   5
   0   9   1 498.670 94.3948   2
   0   9   2 90.9330 36.2366   5
   0   9   2 69.5399 79.4321   4
   0   9   2 183.149 60.2607   2
   0   9   3 596.243 154.950   5
   0   9   3 362.332 152.594   4
   0   9   3 373.030 82.4757   2
   0   9   4 1463.12 241.208   5
   0   9   4 1091.85 278.530   4
   0   9   4 1392.69 165.381   2
   0  -9  -4 1528.43 178.405   2
   0   9   5 2538.45 225.238   2
   0  -9  -5 2417.59 230.045   2
   0   9   6 3030.72 246.549   2
   0  -9  -6 3622.03 291.113   2
   0  -9  -7 2318.58 169.336   1
   0   9   7 2636.04 235.164   2
   0  -9  -7 2229.52 232.354   2
   0  -9  -8 7187.23 296.822   1
   0  -9  -8 7750.95 440.372   2
   0  -9  -9 778.315 99.2656   1
   0  -9  -9 756.243 147.786   2
   0  -9 -10 972.439 108.518   1
   0  -9 -10 931.598 163.826   2
   0  -9 -11 550.647 132.716   2
   0  -9 -12 137.199 67.2181   2
   0  -9 -13-29.9820 37.9845   2
   0  -9 -14 34.2215 47.3984   2
   0  -9 -15-43.8555 51.4177   2
   0  -9 -16 98.5181 69.4942   2
   0  10 -11-39.3826 35.0469   2
   0  10 -10 223.036 79.0545   2
   0 -10  10 223.948 85.4397   3
   0  10 -10 239.159 99.0458   6
   0  10  -9 33.9104 42.1404   2
   0 -10   9 3.44992 15.8554   3
   0 -10   8 62.4260 37.1759   3
   0  10  -8-13.9132 33.5392   6
   0  10  -7 133.086 73.1704   6
   0 -10   7 45.9381 31.0510   3
   0  10  -6-104.300 67.2264   6
   0 -10   6 76.5866 40.4282   3
   0 -10   5-11.3942 16.1656   3
   0  10  -5 3.51357 51.9174   6
   0  10  -4-0.54290 47.8319   6
   0 -10   4 15.1337 25.2164   3
   0  10  -3 1364.33 171.632   2
   0  10  -3 1558.63 248.977   6
   0  10  -3 1553.58 269.151   5
   0  10  -2 1314.21 166.521   2
   0  10  -2 1874.79 281.225   5
   0  10  -2 1399.66 240.733   6
   0 -10   2 1651.98 299.560   5
   0  10  -1 419.258 126.190   5
   0  10  -1 464.338 99.1043   2
   0  10   0 759.932 124.574   2
   0  10   0 1179.50 226.908   5
   0  10   1 554.138 194.059   4
   0  10   1 567.047 107.571   2
   0  10   1 746.137 175.551   5
   0  10   2 12.2635 15.7572   2
   0  10   2-49.3915 73.2968   4
   0  10   2 8.57481 47.1225   5
   0  10   3-2.90004 39.3333   5
   0  10   3 62.4657 36.8625   2
   0  10   3 82.3205 76.1563   4
   0  10   4 598.864 112.617   2
   0  10   4 524.255 237.518   4
   0  10   4 453.436 155.043   5
   0  10   5 77.1733 76.5441   5
   0  10   5 27.3184 26.7852   2
   0 -10  -5-48.8438 46.0136   2
   0 -10  -6 24.1466 32.0262   2
   0  10   6 57.8400 33.4767   2
   0 -10  -7 254.635 88.3584   2
   0 -10  -8 4524.74 354.998   2
   0 -10  -8 4429.64 248.867   1
   0 -10  -9 521.695 122.239   2
   0 -10  -9 687.631 95.4587   1
   0 -10 -10 830.537 108.623   1
   0 -10 -10 778.379 154.738   2
   0 -10 -11 158.640 87.4390   2
   0 -10 -11 206.587 54.6865   1
   0 -10 -12 20.3914 26.8251   2
   0 -10 -13 7.94703 24.9227   2
   0 -10 -14 30.6192 40.5773   2
   0 -10 -15 143.000 81.9332   2
   0  11 -10 22.9410 29.3156   2
   0  11  -9-8.70712 45.0233   6
   0  11  -9 61.8553 46.5020   2
   0  11  -8 53.6601 67.1914   6
   0 -11   8 79.8329 43.6539   3
   0 -11   7 68.8041 34.4602   3
   0  11  -7 71.2075 69.9787   6
   0 -11   6-13.4676 20.5973   3
   0  11  -6-187.564 91.5551   6
   0  11  -5-20.0103 65.8988   6
   0 -11   5 9.32824 17.1289   3
   0 -11   4-0.90386 43.3388   3
   0  11  -4 97.3360 73.5971   6
   0  11  -3 191.408 111.566   6
   0 -11   3 8.91226 29.0397   3
   0  11  -2 1.21525 30.9649   6
   0  11  -2 67.0109 59.4826   5
   0  11  -2 46.5511 43.9730   2
   0  11  -1 374.058 95.8648   2
   0  11  -1 445.881 140.658   5
   0  11   0 313.183 86.4625   2
   0  11   0 627.436 171.251   5
   0  11   1 29.5877 52.5077   5
   0  11   1 31.6927 62.8960   4
   0  11   1 39.9621 26.8091   2
   0  11   2 226.919 112.734   5
   0  11   2 160.480 94.7524   4
   0  11   2 383.901 93.2151   2
   0  11   3-43.0122 86.9285   4
   0  11   3-25.3947 72.0186   5
   0  11   3-42.3485 33.2072   2
   0  11   4 1481.77 190.161   2
   0  11   4 1650.66 284.481   5
   0  11   4 1684.46 398.593   4
   0  11   5 143.949 73.1199   5
   0  11   5-41.1240 82.9925   4
   0  11   6 536.713 151.327   5
   0  11   6 646.342 243.957   4
   0 -11  -6 368.657 102.917   2
   0 -11  -7 480.975 122.779   2
   0 -11  -8 33.7349 44.2498   2
   0 -11  -8 14.6798 25.8734   1
   0 -11  -9 40.9968 42.9248   2
   0 -11  -9 7.71853 15.0389   1
   0 -11 -10-10.0043 20.2288   1
   0 -11 -10 27.6585 28.3309   2
   0 -11 -11 246.401 59.9403   1
   0 -11 -11 231.257 91.3633   2
   0 -11 -12-30.1759 38.5266   2
   0 -11 -13 14.5948 37.3856   2
   0 -11 -14-12.9525 40.7286   2
   0 -11 -15 43.7363 44.8981   2
   0  12  -8-58.0627 63.3019   6
   0  12  -7-35.0527 44.0460   6
   0  12  -6 133.495 87.4204   6
   0 -12   6 130.737 57.8574   3
   0 -12   5 29.0475 28.4862   3
   0  12  -5 68.5673 54.3480   6
   0  12  -4 1266.32 242.150   6
   0 -12   4 868.680 140.205   3
   0  12  -3 1087.27 228.712   6
   0 -12   3 888.456 143.458   3
   0  12  -2 16.8691 30.2991   5
   0  12  -2 55.5118 44.9864   6
   0  12  -1 53.4768 61.9577   5
   0  12   0 416.200 144.860   5
   0  12   0 647.692 275.089   4
   0  12   1-224.122 149.570   4
   0  12   1 198.495 93.3312   5
   0  12   2 2.91484 79.8358   4
   0  12   2 115.161 82.3351   5
   0  12   3 471.405 204.818   4
   0  12   3 491.522 157.353   5
   0  12   4 65.7721 102.694   4
   0  12   4-60.3775 65.8246   5
   0  12   5 60.1412 97.4409   4
   0  12   5-0.38426 55.4504   5
   0  12   6 204.018 190.415   4
   0 -12  -6 593.139 132.517   2
   0  12   6 456.491 163.957   5
   0 -12  -7 1070.89 185.913   2
   0  12   7 857.959 329.566   4
   0  12   7 1067.71 256.906   5
   0 -12  -8 1377.93 150.653   1
   0 -12  -8 1669.54 233.927   2
   0 -12  -9 1055.20 189.615   2
   0 -12  -9 792.454 113.001   1
   0 -12 -10 775.011 167.432   2
   0 -12 -10 566.962 94.9948   1
   0 -12 -11 65.5472 55.8708   2
   0 -12 -11 79.4550 32.6921   1
   0 -12 -12 127.327 72.4444   2
   0 -12 -13 106.476 75.4646   2
   0 -12 -14 47.6754 58.9476   2
   0  13  -7 86.8103 68.9283   6
   0  13  -6-185.309 97.1263   6
   0  13  -5-61.5262 58.9042   6
   0  13  -4-33.1779 49.2492   6
   0 -13   4 46.1104 51.4827   3
   0 -13   3-2.61933 33.0304   3
   0  13  -3 369.555 155.995   6
   0  13  -2 104.064 75.9997   6
   0  13  -2 94.1721 107.795   5
   0  13  -1 102.931 94.6372   5
   0  13  -1 39.3218 31.5931   6
   0  13   0 131.473 96.3812   5
   0  13   1 102.415 79.0995   5
   0  13   1 125.586 126.430   4
   0  13   2 52.4835 65.8698   5
   0  13   2-58.7417 54.4589   4
   0  13   3 318.852 201.347   4
   0  13   3 727.180 200.514   5
   0  13   4-10.9302 52.3545   5
   0  13   4 40.9146 87.2516   4
   0  13   5 322.486 140.185   5
   0  13   5 555.182 260.114   4
   0  13   6 399.825 156.927   5
   0  13   6 565.467 284.292   4
   0 -13  -7 1085.39 193.378   2
   0  13   7 1189.96 284.103   5
   0  13   7 1007.28 395.226   4
   0  13   8 546.209 198.452   5
   0 -13  -8 810.477 175.807   2
   0  13   8 403.257 243.304   4
   0 -13  -8 486.820 99.3662   1
   0 -13  -9 242.498 64.2381   1
   0 -13  -9 307.079 98.9831   2
   0  13   9 184.864 164.975   4
   0 -13 -10-13.4223 35.2727   2
   0 -13 -11-25.8416 38.2377   2
   0 -13 -12 100.071 100.178   2
   0 -13 -13 233.844 113.000   2
   0 -13 -14 129.601 81.2407   2
   0  14  -5-144.182 89.2914   6
   0  14  -4-42.2543 52.6313   6
   0  14  -3 82.3127 69.6867   6
   0  14  -2-78.2087 71.4321   6
   0  14  -1 6.37946 33.6555   5
   0  14  -1-12.3334 36.6233   6
   0  14   0 207.003 116.457   5
   0  14   1-26.7108 50.9419   5
   0  14   1-169.461 149.746   4
   0  14   2-230.207 166.636   4
   0  14   2 205.972 116.015   5
   0  14   3-49.1151 84.3350   4
   0  14   3 63.1631 96.4389   5
   0  14   4 23.0477 40.7471   5
   0  14   4 37.2632 86.8828   4
   0  14   5 81.1230 113.811   4
   0  14   5 204.522 137.007   5
   0  14   6 829.690 335.398   4
   0  14   6 942.424 259.297   5
   0  14   7 233.925 195.974   4
   0  14   7 373.584 165.719   5
   0  14   8 475.749 186.094   5
   0  14   8-148.062 157.751   4
   0 -14  -9 390.104 128.441   2
   0  14   9 196.855 242.858   4
   0  14   9 432.041 200.060   5
   0 -14 -10-53.1748 51.8837   2
   0  14  10 157.747 162.549   4
   0 -14 -11 77.1699 46.6281   2
   0 -14 -12-14.0981 31.8136   2
   0 -14 -13 81.8092 80.7816   2
   0  15  -2 83.8689 73.6400   6
   0  15  -1 12.0128 41.9353   5
   0  15  -1-46.5046 58.6012   6
   0  15   0 74.0929 73.2674   6
   0  15   0 82.9654 78.6737   5
   0  15   1 4.98424 55.5477   5
   0  15   2-64.1060 75.4829   5
   0  15   2 8.08287 59.5251   4
   0  15   3-69.3975 97.0828   4
   0  15   3 0.47171 73.2263   5
   0  15   4 201.083 160.399   4
   0  15   4 176.558 123.858   5
   0  15   5-217.895 179.117   4
   0  15   5 61.4009 72.7448   5
   0  15   6-91.7413 87.7895   5
   0  15   6 137.841 149.185   4
   0  15   7 29.2242 91.2582   4
   0  15   7-153.440 112.752   5
   0  15   8-134.617 109.750   5
   0  15   8 41.3194 262.663   4
   0  15   9 520.995 298.465   4
   0  15   9-17.4779 53.4937   5
   0 -15 -10 1.54361 22.2217   2
   0  15  10 147.576 138.483   5
   0  15  10 1.16277 96.0337   4
   0  15  11-342.168 251.615   4
   0 -15 -11 34.5600 40.6614   2
   0 -15 -12 116.232 83.2619   2
   0  15  12-249.599 223.032   4
   0  16  -1 52.2397 70.1276   5
   0  16   0 45.8501 62.9331   5
   0  16   1-59.4415 71.3559   5
   0  16   2 105.110 139.934   4
   0  16   2 151.788 105.562   5
   0  16   3 174.726 113.651   5
   0  16   3 258.585 192.654   4
   0  16   4 127.677 100.551   5
   0  16   4 226.584 172.628   4
   0  16   5 265.669 151.327   5
   0  16   5 287.540 256.279   4
   0  16   6-83.2149 116.549   4
   0  16   6-71.1623 83.7159   5
   0  16   7-35.8846 62.8443   5
   0  16   7 430.007 313.559   4
   0  16   8-109.809 101.959   5
   0  16   8-1.14847 176.189   4
   0  16   9-481.793 292.901   4
   0  16   9-216.981 142.462   5
   0  16  10 21.0999 62.0450   5
   0  16  10-466.810 295.035   4
   0  16  11 299.266 209.478   5
   0  17   2 14.0483 33.3762   5
   0  17   3-87.1927 134.973   4
   0  17   3-234.882 119.189   5
   0  17   4-123.749 104.597   5
   0  17   4 2.11897 61.5097   4
   0  17   5 76.2166 113.625   4
   0  17   5-23.0188 51.6058   5
   0  17   6-143.606 150.577   4
   0  17   6-93.9119 89.6010   5
   0  17   7-95.5673 98.5209   5
   0  17   7 89.9179 124.563   4
   0  17   8 433.866 197.858   5
   0  17   9 94.8436 99.4614   5
  -1  16  10 245.987 125.366   5
  -1  16   9 529.572 216.679   5
  -1  16   8-128.638 109.138   5
  -1  16   7-56.0493 108.494   4
  -1  16   7 56.1644 75.1902   5
  -1  16   6 144.378 106.159   5
  -1  16   6 329.311 237.776   4
  -1  16   5 74.0979 119.879   4
  -1  16   5-44.8841 64.5000   5
  -1  16   4-61.8201 104.598   4
  -1  16   4-0.49362 74.1388   5
  -1  16   3-55.0406 100.666   4
  -1  16   2 149.973 160.505   4
  -1  15  10-43.5091 115.342   4
  -1  15  10 215.946 175.399   5
  -1  15   9 441.442 284.204   4
  -1  15   9 319.306 166.143   5
  -1  15   8-166.807 120.417   5
  -1  15   8 39.6651 112.791   4
  -1  15   7 104.603 120.019   4
  -1  15   7-264.184 142.191   5
  -1  15   6 326.696 224.389   4
  -1  15   6 139.969 103.128   5
  -1  15   5 30.9036 53.5813   5
  -1  15   5-47.7152 94.9584   4
  -1  15   4-15.4625 51.4863   4
  -1  15   4 0.45484 61.3099   5
  -1  15   3 116.817 73.1350   5
  -1  15   3 321.864 204.284   4
  -1  15   2 135.399 96.0012   5
  -1  15   2-15.6681 61.8890   4
  -1  15   1-10.7563 32.9076   5
  -1  15   1 209.499 181.744   4
  -1  15   0-40.1297 53.5226   5
  -1  15   0-8.09973 35.4961   6
  -1  15  -1-13.6636 41.7509   6
  -1  15  -1-7.07168 33.4279   5
   1 -14 -11 87.9381 53.9807   2
  -1  14  11 139.217 161.417   4
  -1  14  10-58.8847 111.824   4
   1 -14 -10 233.968 106.814   2
  -1  14   9-2.75190 34.2093   5
  -1  14   9-111.346 141.546   4
   1 -14  -9 67.9163 81.9302   2
   1 -14  -8 206.033 77.0816   1
  -1  14   8 23.4699 98.0863   4
  -1  14   8 157.614 48.2740   5
  -1  14   7 38.6975 86.9374   5
  -1  14   7 19.2029 72.5189   4
  -1  14   6-137.612 152.605   4
  -1  14   6 63.1934 70.7110   5
  -1  14   5 37.4074 94.9097   4
  -1  14   5-36.7774 58.1177   5
  -1  14   4 0.41855 79.2022   5
  -1  14   4 0.86486 96.2384   4
  -1  14   3-33.2425 103.381   4
  -1  14   3 35.4497 38.1166   5
  -1  14   2 119.680 87.5646   5
  -1  14   2-210.309 164.277   4
  -1  14   1 493.219 278.780   4
  -1  14   1 216.628 105.945   5
  -1  14   0 27.8737 74.6720   5
  -1  14  -1 187.854 107.306   5
  -1  14  -1-44.4086 61.3894   6
  -1  14  -2-47.5441 58.4734   6
  -1  14  -3 280.563 146.138   6
  -1  14  -4 171.262 97.2561   6
   1 -13 -12-25.6964 40.3966   2
   1 -13 -11 74.7953 57.7294   2
   1 -13 -10-10.8948 20.0297   1
   1 -13 -10 145.295 78.2525   2
   1 -13  -9-15.6285 22.9032   1
   1 -13  -9-78.5446 60.7574   2
  -1  13   8 31.6590 62.7806   5
   1 -13  -8 124.963 60.2216   1
   1 -13  -8 225.565 94.7031   2
  -1  13   8-52.8976 112.380   4
  -1  13   7 196.241 122.248   5
  -1  13   7 0.98883 160.929   4
  -1  13   6-83.1342 76.2285   5
  -1  13   6 194.709 143.364   4
  -1  13   5 131.481 122.841   4
  -1  13   5-52.9089 64.0973   5
  -1  13   4 162.791 99.8429   5
  -1  13   4 257.241 215.843   4
  -1  13   3-79.7298 105.291   4
  -1  13   3 197.036 124.006   5
  -1  13   2-154.825 139.836   4
  -1  13   2 140.877 91.0826   5
  -1  13   1 199.504 139.280   5
  -1  13   1 212.264 159.994   4
  -1  13   0 57.3530 52.3751   5
  -1  13   0 320.506 212.004   4
  -1  13  -1 9.17994 34.6413   6
  -1  13  -1 57.5420 49.4142   5
  -1  13  -2 158.198 97.3308   6
  -1  13  -3 64.1301 42.3361   6
  -1  13  -4-19.6258 36.7956   6
  -1  13  -5 30.4339 51.5160   6
  -1  13  -6-26.8178 43.8402   6
   1 -12 -13 316.905 122.313   2
   1 -12 -12 154.938 80.9388   2
   1 -12 -11 228.524 95.5332   2
   1 -12 -11 215.813 64.6608   1
   1 -12 -10 57.8941 57.6696   2
   1 -12 -10 26.4213 29.8855   1
   1 -12  -9 0.27661 23.0891   1
   1 -12  -9-103.093 76.7986   2
   1 -12  -8 54.9430 41.1154   1
   1 -12  -8 113.261 71.5033   2
  -1  12   8 204.593 169.736   4
   1 -12  -7 131.090 58.6517   2
  -1  12   7 134.638 124.146   4
  -1  12   6 103.156 65.4714   5
  -1  12   6 102.592 125.249   4
  -1  12   5-173.115 155.596   4
  -1  12   5 24.4273 57.2746   5
  -1  12   4-140.377 135.048   4
  -1  12   4-77.0584 71.6118   5
  -1  12   3-184.321 147.463   4
  -1  12   3 236.712 109.813   5
  -1  12   2 30.8509 45.0435   5
  -1  12   2-162.635 135.026   4
  -1  12   1 587.371 239.162   4
  -1  12   1 683.791 182.482   5
  -1  12   0 18.0990 74.3681   4
  -1  12   0 9.77928 57.8330   5
  -1  12  -1-83.5114 68.5938   5
  -1  12  -2 1.45705 49.3165   6
  -1  12  -2-21.4764 46.8198   5
  -1  12  -3 44.3729 50.0720   6
   1 -12   3 118.678 51.2275   3
  -1  12  -4 303.493 121.508   6
   1 -12   4 192.733 60.7920   3
  -1  12  -5 133.668 79.7914   6
  -1  12  -6 34.8040 51.1459   6
  -1  12  -7-120.035 79.2510   6
   1 -11 -14 420.186 138.458   2
   1 -11 -13 42.2878 41.1586   2
   1 -11 -12 93.8892 41.4360   1
   1 -11 -12 92.9004 71.1685   2
   1 -11 -11 867.489 180.501   2
   1 -11 -11 850.396 124.685   1
   1 -11 -10 50.2672 44.2362   1
   1 -11 -10 47.1465 49.7972   2
   1 -11  -9 39.2967 46.1965   2
   1 -11  -9 205.769 64.6059   1
   1 -11  -8 413.295 87.8825   1
   1 -11  -8 537.295 136.754   2
   1 -11  -7 260.994 92.1765   2
  -1  11   7 47.0798 83.5736   4
   1 -11  -6 227.568 83.5032   2
  -1  11   6 241.485 196.328   4
  -1  11   5-0.68494 56.7419   5
  -1  11   5-7.79409 73.0973   4
  -1  11   4 76.0118 35.2210   5
  -1  11   4 458.764 271.377   4
  -1  11   3 13.9043 66.9275   4
  -1  11   3 112.115 78.3614   5
  -1  11   2 295.112 121.300   5
  -1  11   2 329.886 186.632   4
  -1  11   1 161.100 76.5429   5
  -1  11   1 194.794 148.701   4
  -1  11   0-35.9435 76.7736   4
  -1  11   0 6.79681 51.1920   5
  -1  11  -1 360.784 125.346   5
  -1  11  -1 279.639 183.899   4
  -1  11  -2 606.825 170.730   6
  -1  11  -2 573.953 163.624   5
   1 -11   3 443.273 92.4325   3
  -1  11  -3 350.902 130.609   6
   1 -11   4 75.0817 40.1379   3
  -1  11  -4 77.7247 85.5724   6
  -1  11  -5 60.6522 68.2048   6
   1 -11   5 34.5498 19.2395   3
  -1  11  -6-123.511 77.3713   6
   1 -11   6 120.690 48.5201   3
  -1  11  -7-123.076 77.6578   6
  -1  11  -8 28.1173 41.2113   6
  -1  11  -9 114.253 87.7350   6
  -1  11 -11-31.5485 34.1108   2
   1 -10 -15 159.351 88.4947   2
   1 -10 -14 153.652 79.1663   2
   1 -10 -13 297.382 111.310   2
   1 -10 -12 317.071 107.004   2
   1 -10 -11 123.020 49.5019   1
   1 -10 -11 157.585 74.4616   2
   1 -10 -10 254.436 66.4335   1
   1 -10 -10 187.168 69.0105   2
   1 -10  -9-97.1303 59.3034   2
   1 -10  -9 39.3650 37.7839   1
   1 -10  -8 9.76325 36.9151   2
   1 -10  -8 1.44195 20.2298   1
   1 -10  -7 193.234 56.1042   1
   1 -10  -7 142.891 71.9725   2
   1 -10  -6-11.7422 53.7031   2
  -1  10   6-70.9605 105.849   4
   1 -10  -5 74.4159 39.4704   2
  -1  10   5 104.871 154.613   4
  -1  10   4 67.6147 65.8761   5
  -1  10   4 93.3532 105.377   4
  -1  10   3-94.6505 134.002   4
  -1  10   3 3.32543 30.4527   2
  -1  10   3 64.9753 56.1894   5
  -1  10   2 273.866 167.478   4
  -1  10   2 744.268 171.715   5
  -1  10   2 589.839 121.433   2
  -1  10   1 200.544 68.4786   2
  -1  10   1 273.223 158.944   4
  -1  10   1 283.481 119.632   5
  -1  10   0 254.002 155.497   4
  -1  10   0 371.159 126.072   5
  -1  10   0 299.757 84.8801   2
  -1  10  -1 375.321 120.906   5
  -1  10  -1 330.665 89.8561   2
  -1  10  -1 241.841 152.969   4
  -1  10  -2 1716.85 275.601   6
  -1  10  -2 1965.98 284.239   5
   1 -10   3 130.111 85.9180   5
  -1  10  -3 27.4961 44.7891   6
  -1  10  -4 1974.83 296.027   6
   1 -10   5 607.832 98.4164   3
  -1  10  -5 453.935 135.661   6
   1 -10   6-39.7726 27.3475   3
  -1  10  -6 95.0100 71.1220   6
   1 -10   7 6.83012 14.2209   3
  -1  10  -7-31.0954 64.8815   6
  -1  10  -8 1.80491 41.5248   6
   1 -10   8 57.4725 34.5730   3
  -1  10  -9 157.244 90.3446   6
  -1  10 -10 50.1803 60.4510   6
  -1  10 -11 57.6827 44.0013   2
  -1  10 -12 37.1242 37.7340   2
   1  -9 -15 413.641 137.399   2
   1  -9 -14 212.450 95.7492   2
   1  -9 -13 276.380 98.7558   2
   1  -9 -12 1165.09 204.134   2
   1  -9 -11-12.6388 23.2101   1
   1  -9 -11-0.47071 33.1201   2
   1  -9 -10-33.5400 53.6503   2
   1  -9 -10 62.8904 35.4351   1
   1  -9  -9 556.966 92.6323   1
   1  -9  -9 550.729 124.985   2
   1  -9  -8 4132.89 345.063   2
   1  -9  -8 3974.75 249.315   1
   1  -9  -7 1183.80 139.109   1
   1  -9  -7 1221.41 182.784   2
   1  -9  -6 1261.39 181.569   2
  -1   9   5 1258.43 167.414   2
  -1   9   5 1417.70 347.215   4
   1  -9  -5 1197.18 172.250   2
   1  -9  -4 71.5957 36.6184   2
  -1   9   4-18.6295 36.1783   5
  -1   9   4 26.8620 22.7624   2
  -1   9   4-50.4634 148.049   4
  -1   9   3-5.94561 73.7003   4
  -1   9   3 61.3405 36.1331   2
  -1   9   3 174.210 67.2770   5
  -1   9   2 289.340 169.374   4
  -1   9   2 271.635 90.7217   5
  -1   9   2 233.139 69.3620   2
  -1   9   1-20.8023 37.8188   5
  -1   9   1-21.3188 25.0702   2
  -1   9   1 35.3879 65.6675   4
  -1   9   0 46.6953 36.2594   2
  -1   9   0-27.3532 94.5534   4
  -1   9   0-20.8919 58.8361   5
  -1   9  -1 276.964 108.289   5
  -1   9  -1 118.517 82.8398   4
   1  -9   1 126.568 90.4702   4
  -1   9  -1 174.537 57.8638   2
  -1   9  -2 564.340 113.870   2
  -1   9  -2 359.679 120.173   6
   1  -9   2 352.364 127.642   5
  -1   9  -2 464.529 132.733   5
  -1   9  -3 1987.39 279.465   6
   1  -9   3 2075.03 315.558   5
   1  -9   4 177.816 94.2520   5
  -1   9  -4-34.6282 41.3621   6
   1  -9   5-23.7035 39.0937   5
  -1   9  -5 27.8788 42.4943   6
   1  -9   6 13.6467 17.9077   3
  -1   9  -6-17.6589 34.0581   6
   1  -9   7 371.136 80.3537   3
  -1   9  -7 411.061 128.737   6
   1  -9   8-33.4489 26.8509   3
  -1   9  -8 65.0261 56.1425   6
  -1   9  -9 178.444 86.5459   6
   1  -9   9-5.65966 21.1626   3
  -1   9 -10 74.9887 63.2038   6
  -1   9 -11 52.2331 44.5518   2
  -1   9 -11 103.583 74.3844   6
  -1   9 -12 196.973 90.5599   2
  -1   9 -13 153.683 72.3002   2
   1  -8 -16 200.089 101.222   2
   1  -8 -15 260.916 114.011   2
   1  -8 -14 197.533 98.1485   2
   1  -8 -13 48.3300 46.6496   2
   1  -8 -12 240.055 90.3783   2
   1  -8 -11 366.368 106.259   2
   1  -8 -10 52.7923 27.0494   1
   1  -8 -10-13.8796 32.7253   2
   1  -8  -9 157.360 52.2228   1
   1  -8  -9 126.667 64.2270   2
   1  -8  -8 2343.81 185.536   1
   1  -8  -8 2467.84 253.895   2
   1  -8  -7 438.520 79.1521   1
   1  -8  -7 425.945 101.414   2
  -1   8   7 449.843 95.8685   2
  -1   8   6 176.119 58.5011   2
   1  -8  -6 113.972 63.5904   2
  -1   8   5 317.960 82.6998   2
   1  -8  -5 288.482 79.7276   2
  -1   8   4-1.10560 13.7584   2
  -1   8   4-48.3221 68.2587   4
   1  -8  -4 21.2837 36.6483   2
  -1   8   3 2090.51 401.480   4
  -1   8   3 1993.49 254.079   5
  -1   8   3 2357.86 213.259   2
  -1   8   2 6026.97 430.829   5
  -1   8   2 5107.29 615.933   4
  -1   8   2 6065.82 342.430   2
  -1   8   1 725.368 221.414   4
  -1   8   1 720.150 144.505   5
  -1   8   1 736.120 116.924   2
  -1   8   0 2037.45 250.052   5
  -1   8   0 1261.36 287.555   4
  -1   8   0 1919.64 190.839   2
  -1   8  -1 869.027 130.481   2
   1  -8   1 954.414 275.780   4
  -1   8  -1 960.941 171.891   5
  -1   8  -1 914.988 267.999   4
   1  -8   2 1209.62 221.163   5
  -1   8  -2 971.811 174.895   5
   1  -8   2 958.054 290.238   4
   1  -8   3 5560.09 486.116   5
   1  -8   3 4927.22 260.689   3
   1  -8   3 6121.12 783.156   4
  -1   8  -3 5110.61 429.845   6
   1  -8   4 1393.13 248.031   5
   1  -8   4 1350.26 136.637   3
  -1   8  -4 1199.93 206.762   6
   1  -8   5-135.122 61.3629   5
  -1   8  -5 104.260 62.5390   6
  -1   8  -6 214.850 95.1522   6
   1  -8   6 172.113 95.5527   5
   1  -8   7 20.7489 19.5785   3
  -1   8  -7-96.1374 61.9276   6
  -1   8  -8 2.81255 33.1402   6
   1  -8   8-40.4169 30.3460   3
   1  -8   9 36.3461 37.9856   3
  -1   8  -9 47.7090 50.9457   6
  -1   8 -10 241.330 97.6145   6
  -1   8 -10-4.22110 20.0651   2
  -1   8 -11 174.580 94.4812   6
  -1   8 -11 70.7989 48.5345   2
  -1   8 -12 153.425 82.6377   6
  -1   8 -12-25.5289 31.3799   2
  -1   8 -13 237.097 87.6561   2
  -1   8 -14 42.6660 55.6228   2
   1  -7 -16 16.5332 34.8304   2
   1  -7 -15 87.2372 66.5883   2
   1  -7 -14 386.465 119.167   2
   1  -7 -13 285.499 101.491   2
   1  -7 -12 1262.62 206.681   2
   1  -7 -11-12.5450 44.4823   2
   1  -7 -10 82.4294 47.3080   2
   1  -7 -10 47.0815 30.4162   1
   1  -7  -9 1220.11 129.167   1
   1  -7  -9 1116.29 170.901   2
   1  -7  -8 246.634 56.2734   1
   1  -7  -8 247.429 83.9454   2
  -1   7   8 228.062 66.8807   2
   1  -7  -7 2677.94 186.015   1
  -1   7   7 3169.11 250.839   2
   1  -7  -7 2785.94 251.524   2
   1  -7  -6 1837.01 195.255   2
  -1   7   6 1958.03 192.495   2
   1  -7  -6 1743.45 147.962   1
   1  -7  -5 668.368 117.422   2
  -1   7   5 702.967 110.927   2
  -1   7   4 484.768 92.5515   2
   1  -7  -4 477.142 96.5489   2
   1  -7  -3 64.2314 41.2259   2
  -1   7   3 5.47300 106.017   4
  -1   7   3 26.5571 14.2308   2
  -1   7   2 166.633 65.5515   5
  -1   7   2 189.115 53.3889   2
  -1   7   1 672.884 132.350   5
  -1   7   1 748.826 112.871   2
  -1   7   0 1604.91 165.460   2
  -1   7   0 1210.25 257.823   4
  -1   7   0 1525.96 203.610   5
  -1   7  -1 2253.40 197.940   2
  -1   7  -1 1726.40 329.315   4
   1  -7   1 2892.21 470.051   4
  -1   7  -1 2100.71 243.979   5
   1  -7   1 2452.87 275.371   5
   1  -7   2-97.7170 82.6423   4
  -1   7  -2-1.90338 35.1349   5
  -1   7  -2 81.7557 101.901   4
   1  -7   2 23.4252 30.8947   5
   1  -7   3 5396.34 688.925   4
   1  -7   3 5065.92 248.460   3
   1  -7   3 5076.16 427.008   5
  -1   7  -3 5460.34 421.049   6
  -1   7  -4 134.278 72.5865   6
   1  -7   4 161.393 44.9068   3
   1  -7   4 277.162 193.160   4
   1  -7   4 137.403 71.2764   5
  -1   7  -5 767.240 156.485   6
   1  -7   5 881.609 106.062   3
   1  -7   5 902.932 196.965   5
  -1   7  -6 1646.41 230.193   6
   1  -7   6 1703.56 280.774   5
  -1   7  -7 448.849 115.770   6
   1  -7   7 319.930 137.300   5
  -1   7  -8 652.910 147.659   6
   1  -7   8 509.505 93.0620   3
  -1   7  -9 13.3887 31.1445   6
  -1   7 -10 331.727 109.991   6
  -1   7 -10 330.536 92.8432   2
  -1   7 -11 229.593 85.4966   6
  -1   7 -11 172.821 68.9949   2
  -1   7 -12 13.1124 28.3377   2
  -1   7 -12-44.7893 47.2700   6
  -1   7 -13-22.3186 25.8029   2
  -1   7 -13 47.7509 48.1865   6
  -1   7 -14 67.2349 48.9772   2
   1  -6 -16 55.4421 71.0024   2
   1  -6 -15-44.0601 46.3124   2
   1  -6 -14 274.216 101.746   2
   1  -6 -13 570.567 142.091   2
   1  -6 -12 4.79844 43.6610   2
   1  -6 -11 32.8249 35.7725   2
   1  -6 -10 9.59072 22.9916   2
   1  -6  -9 6010.42 378.679   2
   1  -6  -9 6308.94 286.000   1
   1  -6  -8 5026.82 249.820   1
  -1   6   8 5437.08 322.594   2
   1  -6  -8 4818.38 325.986   2
  -1   6   7 2496.91 212.832   2
   1  -6  -7 2337.09 166.972   1
   1  -6  -6 5289.82 250.796   1
  -1   6   6 5470.53 306.273   2
  -1   6   5 248.785 63.2936   2
   1  -6  -5 167.244 40.0642   1
  -1   6   4 80.6507 33.5969   2
   1  -6  -3 857.649 117.165   2
  -1   6   3 708.230 102.582   2
  -1   6   2 956.106 117.502   2
  -1   6   1 195.266 54.5126   2
  -1   6   1 131.157 55.1720   5
   1  -6   0 5614.44 575.655   4
  -1   6   0 4607.61 316.922   5
  -1   6   0 5018.50 274.311   2
  -1   6  -1 2447.79 243.087   5
   1  -6   1 2804.58 438.992   4
   1  -6   1 2761.90 269.623   5
  -1   6  -2 32.9608 33.2511   5
   1  -6   2-105.460 138.216   4
   1  -6   2 28.6989 28.5012   5
   1  -6   3 24.8109 18.6236   3
   1  -6   3-57.5389 52.1378   4
   1  -6   3 30.6557 36.4413   5
  -1   6  -4 1011.25 168.707   6
   1  -6   4 1190.17 112.458   3
   1  -6   4 1077.62 188.960   5
   1  -6   4 1048.05 284.932   4
   1  -6   5 627.327 83.2066   3
  -1   6  -5 489.772 115.097   6
   1  -6   5 543.098 140.478   5
   1  -6   5 521.533 201.594   4
  -1   6  -6 43.4521 33.6817   6
   1  -6   6-21.8110 36.3492   5
   1  -6   6 95.3856 35.3386   3
   1  -6   6-35.8218 129.602   4
  -1   6  -7 540.223 127.131   6
   1  -6   7 500.911 152.249   5
   1  -6   8 569.254 93.9450   3
  -1   6  -8 565.753 132.773   6
  -1   6  -9-5.02713 36.7887   6
  -1   6 -10 1269.16 204.048   6
  -1   6 -10 1074.72 163.456   2
  -1   6 -11 198.973 72.0302   2
  -1   6 -11 191.866 80.6860   6
  -1   6 -12-10.2779 27.9690   6
  -1   6 -12 30.4883 37.0918   2
  -1   6 -13 18.5521 33.3974   6
  -1   6 -13 66.7311 49.4830   2
  -1   6 -14 30.9168 41.8366   6
  -1   6 -14-22.9374 30.6471   2
  -1   6 -15 13.3562 23.8113   2
   1  -5 -16 196.675 99.1570   2
   1  -5 -15 159.355 85.3737   2
   1  -5 -14 149.657 69.7449   2
   1  -5 -13 1798.23 241.263   2
  -1   5  12 503.718 107.173   1
   1  -5 -12 458.307 115.406   2
   1  -5 -11 243.137 78.1506   2
  -1   5  11 289.435 79.1054   1
   1  -5 -10 159.032 60.7819   2
  -1   5  10 254.129 71.3686   1
  -1   5   9 1715.93 179.945   2
   1  -5  -9 1775.57 200.037   2
   1  -5  -8 1869.01 147.420   1
  -1   5   8 1944.40 184.266   2
  -1   5   7 1524.67 158.641   2
   1  -5  -7 1402.17 123.331   1
  -1   5   6 5245.89 283.336   2
   1  -5  -6 4601.33 221.951   1
   1  -5  -5 10871.8 334.411   1
  -1   5   5 10645.6 393.101   2
  -1   5   4 35.2982 23.8512   2
  -1   5   3 1331.22 134.587   2
  -1   5   2 844.922 105.673   2
   1  -5  -2 915.989 112.073   2
  -1   5   1 15964.8 452.621   2
  -1   5   1 15982.7 531.397   5
  -1   5   0 4646.91 288.027   5
   1  -5   0 5260.53 521.026   4
  -1   5   0 4874.93 252.299   2
   1  -5   1 6.41096 60.4214   4
   1  -5   1 133.703 63.0778   5
  -1   5  -1 169.274 63.5472   5
   1  -5   2 7947.88 701.189   4
  -1   5  -2 8524.91 408.042   5
   1  -5   2 8006.35 439.369   5
   1  -5   3 610.003 127.793   5
   1  -5   3 739.471 218.981   4
   1  -5   3 536.994 68.3230   3
   1  -5   4 2372.45 144.806   3
   1  -5   4 2270.10 386.076   4
   1  -5   4 2095.97 246.001   5
   1  -5   5 4858.23 610.092   4
   1  -5   5 4863.01 395.529   5
  -1   5  -5 5213.75 355.705   6
   1  -5   5 5265.64 227.426   3
   1  -5   6 1587.49 236.218   5
  -1   5  -6 1674.83 206.115   6
   1  -5   6 1769.84 141.048   3
   1  -5   6 1845.67 410.554   4
   1  -5   7 388.790 124.658   5
   1  -5   7 293.032 190.922   4
  -1   5  -7 184.169 69.4660   6
  -1   5  -8 169.029 76.5480   6
   1  -5   8 75.2475 64.8206   5
  -1   5  -9 1350.11 197.978   6
  -1   5 -10 976.679 170.627   6
  -1   5 -10 945.509 145.053   2
  -1   5 -11 344.354 88.4013   2
  -1   5 -11 421.570 114.445   6
  -1   5 -12 114.145 58.0523   6
  -1   5 -12 127.541 60.8618   2
  -1   5 -13 303.299 111.031   6
  -1   5 -13 304.090 95.4975   2
  -1   5 -14 42.8933 43.9248   2
  -1   5 -14 61.2544 60.7420   6
  -1   5 -15 40.4585 34.2204   2
   1  -4 -17-16.2936 34.6654   2
   1  -4 -16 157.196 69.5861   2
   1  -4 -15 70.7325 57.1628   2
   1  -4 -14 26.5985 34.7967   2
   1  -4 -13 159.820 75.6848   2
  -1   4  12 39.7689 27.3453   1
   1  -4 -12 29.0698 32.2595   2
  -1   4  11 576.248 111.285   1
   1  -4 -11 608.825 125.819   2
   1  -4 -10 764.859 134.974   2
  -1   4  10 887.908 131.356   1
   1  -4  -9 2560.33 230.330   3
  -1   4   9 2557.36 211.175   2
   1  -4  -9 2547.91 231.664   2
  -1   4   8 230.094 63.8342   1
  -1   4   8 218.928 57.2994   2
  -1   4   7 260.195 61.8602   1
  -1   4   7 194.468 56.3514   2
   1  -4  -7 230.230 50.6092   1
  -1   4   6 41217.4 757.862   2
   1  -4  -6 39172.0 612.690   1
   1  -4  -5 145.799 38.9901   1
  -1   4   5 137.572 42.0410   2
   1  -4  -4 887.918 87.0170   1
  -1   4   4 848.352 101.574   2
  -1   4   3 1477.78 133.237   2
  -1   4   2 1171.57 115.124   2
   1  -4  -2 1183.18 117.425   2
  -1   4   1 6264.75 258.821   2
   1  -4   0 496.920 148.733   4
  -1   4   0 461.523 80.8375   5
  -1   4   0 515.693 75.9817   2
  -1   4   0 445.113 143.442   4
  -1   4  -1 1906.41 167.202   5
   1  -4   1 1861.70 176.901   5
   1  -4   1 1603.41 282.623   4
  -1   4  -2 6179.60 312.611   5
   1  -4   2 5866.49 325.778   5
   1  -4   2 5152.31 513.250   4
   1  -4   3 8270.37 424.562   5
   1  -4   3 8144.65 652.233   4
   1  -4   3 8586.80 239.729   3
   1  -4   4 12907.8 919.162   4
   1  -4   4 11568.9 522.529   5
   1  -4   4 11993.0 299.001   3
   1  -4   5 4337.18 572.158   4
   1  -4   5 4084.30 189.065   3
   1  -4   5 4078.00 331.181   5
   1  -4   6 163.167 39.5247   3
   1  -4   6 95.6261 61.8355   6
   1  -4   6 51.1187 30.8833   5
   1  -4   7 418.971 122.003   6
  -1   4  -7 358.279 89.7653   6
   1  -4   7 434.402 127.266   5
   1  -4   8-10.2503 27.7444   5
   1  -4   8 25.7917 33.8895   6
  -1   4  -8-11.9753 18.9751   6
  -1   4  -9 1622.10 202.762   6
  -1   4  -9 1571.18 173.318   2
   1  -4   9 1617.70 274.990   5
  -1   4 -10 108.566 50.7951   2
  -1   4 -10 135.708 54.3671   6
  -1   4 -11 46.1194 38.5864   2
  -1   4 -11 122.055 72.7965   6
  -1   4 -12-6.23570 27.0010   6
  -1   4 -12-10.4588 20.7254   2
  -1   4 -13 296.186 109.396   6
  -1   4 -13 185.394 69.9019   2
  -1   4 -14-4.66104 18.7606   2
  -1   4 -14 14.3091 30.8201   6
  -1   4 -15 225.697 93.2935   6
  -1   4 -15 99.7873 61.0908   2
  -1   4 -16 104.949 67.3277   2
   1  -3 -17 30.2926 39.5468   2
   1  -3 -16 140.969 76.1139   2
   1  -3 -15 142.600 67.5247   2
   1  -3 -14 175.267 71.7760   2
   1  -3 -13 24.6020 36.7305   2
  -1   3  12 2489.75 239.276   1
   1  -3 -12 2435.04 256.273   2
   1  -3 -11 244.228 81.5627   2
  -1   3  11 440.267 95.5445   1
  -1   3  10 2153.63 201.031   1
   1  -3 -10 2296.08 225.495   2
  -1   3  10 2177.64 202.128   2
  -1   3  10 2387.75 235.320   6
   1  -3  -9 2028.78 198.307   3
  -1   3   9 2185.69 212.578   6
  -1   3   9 2149.78 190.792   2
   1  -3  -9 1793.73 188.270   2
  -1   3   8 483.700 85.1862   2
   1  -3  -8 609.008 100.687   3
  -1   3   7 5708.39 277.818   2
  -1   3   7 6015.77 277.030   1
   1  -3  -7 5838.72 298.691   3
  -1   3   6 9273.89 337.532   2
   1  -3  -6 8566.15 277.308   1
  -1   3   6 9443.71 329.820   1
   1  -3  -5 7495.82 247.376   1
  -1   3   5 7641.59 292.151   2
  -1   3   5 7591.58 269.261   1
   1  -3  -4 1571.74 111.044   1
  -1   3   4 1517.64 125.422   2
   1  -3  -3 17124.6 344.842   1
  -1   3   3 17203.3 412.281   2
  -1   3   2 12193.2 334.137   2
  -1   3   1 711.490 79.6137   2
   1  -3   0 1286.92 206.729   4
  -1   3   0 1323.70 112.924   5
  -1   3   0 1341.56 108.309   2
   1  -3   1 2842.46 183.767   5
  -1   3  -1 3022.62 178.362   5
   1  -3   1 3582.52 368.134   4
   1  -3   2 1839.48 270.358   4
   1  -3   2 1672.72 151.938   5
   1  -3   2 1580.23 82.6947   3
   1  -3   3 6.65408 22.1958   5
   1  -3   3 47.6042 61.7252   4
   1  -3   3 23.5202 14.6793   3
   1  -3   4 94.3243 42.4276   6
   1  -3   4 128.191 51.4914   5
   1  -3   4 135.000 29.8063   3
   1  -3   5 1331.79 102.063   3
   1  -3   5 1170.56 170.492   6
  -1   3  -5 1158.56 110.568   3
   1  -3   6 10224.3 315.668   3
   1  -3   6 10186.6 520.381   6
  -1   3  -6 9570.20 351.528   3
  -1   3  -7 3444.56 229.131   3
   1  -3   7 3704.62 329.249   6
  -1   3  -8-23.2471 33.0697   6
   1  -3   8 13.3987 32.6989   6
  -1   3  -8 20.7636 26.4101   2
  -1   3  -8-8.08556 23.1372   3
  -1   3  -9 233.383 69.5698   3
  -1   3  -9 192.992 63.4567   6
  -1   3  -9 154.705 49.6289   2
  -1   3 -10 164.963 60.1281   2
  -1   3 -10 169.157 62.7246   6
  -1   3 -10 188.324 64.9203   3
  -1   3 -11 51.3371 20.6453   3
  -1   3 -11 121.245 54.9335   2
  -1   3 -11 85.5025 36.6501   6
  -1   3 -12 57.4651 48.9152   6
  -1   3 -12 5.45136 24.7220   2
  -1   3 -13 497.116 126.963   6
  -1   3 -13 355.086 94.5513   2
  -1   3 -14-20.2983 28.6048   2
  -1   3 -14 0.24816 24.7449   6
  -1   3 -15 82.9788 58.7823   6
  -1   3 -15 11.1448 30.0261   2
  -1   3 -16 6.37781 20.9094   2
   1  -2 -17 30.5111 64.5306   2
   1  -2 -16-20.8649 42.0961   2
   1  -2 -15 30.9814 59.3712   2
   1  -2 -14 456.441 119.833   2
   1  -2 -13 118.215 61.7968   2
   1  -2 -12 339.061 91.7500   2
   1  -2 -11 2160.07 225.301   2
  -1   2  11 2069.54 203.539   1
  -1   2  10 1814.25 203.918   6
  -1   2  10 1659.68 172.333   1
  -1   2  10 1737.57 177.384   2
   1  -2 -10 1653.10 186.341   2
  -1   2   9 314.049 79.3924   6
  -1   2   9 283.899 68.3540   2
   1  -2  -9 166.172 58.3119   2
   1  -2  -9 302.445 75.3123   3
  -1   2   9 185.025 54.5307   1
  -1   2   8 1885.76 181.489   6
   1  -2  -8 2099.80 185.024   3
  -1   2   8 1851.77 162.647   2
   1  -2  -8 1887.52 177.206   2
  -1   2   7 1.15533 13.5262   6
  -1   2   7 56.1078 27.1542   2
   1  -2  -7 47.2523 30.1272   3
  -1   2   7 9.30885 13.1168   1
  -1   2   6 34466.4 618.412   2
   1  -2  -6 34670.1 657.837   3
  -1   2   6 34557.1 626.704   1
   1  -2  -5 5767.76 248.609   3
  -1   2   5 5499.44 233.036   2
  -1   2   5 5671.83 235.821   1
   1  -2  -5 5847.24 212.264   1
   1  -2  -4 21888.1 391.272   1
  -1   2   4 22260.2 441.299   2
  -1   2   4 22770.9 442.771   1
  -1   2   3 88050.6 831.731   2
  -1   2   3 85155.1 772.635   1
   1  -2  -3 88891.0 757.880   1
  -1   2   2 17359.2 359.847   2
  -1   2   1 338.216 47.5745   2
  -1   2   0 10138.4 240.322   5
   1  -2   0 11237.2 521.129   4
  -1   2  -1 28123.6 420.254   5
   1  -2   1 27164.6 446.332   5
   1  -2   1 28112.9 893.531   4
   1  -2   2 12955.3 657.286   4
   1  -2   2 12228.1 339.808   5
   1  -2   2 11916.5 181.377   3
   1  -2   3 94.4718 40.3846   6
   1  -2   3 119.866 22.2184   3
  -1   2  -3 96.5934 22.2607   3
  -1   2  -4 2152.62 123.490   3
   1  -2   4 2186.26 195.095   6
   1  -2   4 2179.24 109.577   3
   1  -2   5 2482.36 220.289   6
  -1   2  -5 2622.31 152.447   3
   1  -2   6 3192.31 262.895   6
  -1   2  -6 3085.69 181.865   3
   1  -2   7 1.15736 44.2354   6
  -1   2  -7 67.9754 35.2122   3
  -1   2  -8 1382.49 146.181   3
   1  -2   8 1501.86 200.367   6
  -1   2  -8 1409.22 163.004   6
  -1   2  -8 1438.82 148.816   2
  -1   2  -9 2080.18 184.406   2
  -1   2  -9 2101.97 211.192   6
   1  -2   9 2123.93 257.144   6
  -1   2  -9 2178.24 198.406   3
  -1   2 -10-36.0421 50.9405   6
  -1   2 -10 46.7037 35.3437   3
  -1   2 -10-21.3290 30.8280   2
  -1   2 -11 1164.67 157.519   2
  -1   2 -11 1241.04 180.306   6
  -1   2 -11 1168.27 168.592   3
  -1   2 -12 893.504 158.953   6
  -1   2 -12 570.717 112.051   2
  -1   2 -13 84.1253 48.9429   2
  -1   2 -13 108.527 58.4450   6
  -1   2 -14-40.2763 43.8959   2
  -1   2 -14-24.7930 26.8435   6
  -1   2 -15 46.4571 50.2952   2
  -1   2 -16-44.2810 42.1458   2
   1  -1 -17 242.738 96.6522   2
   1  -1 -16-7.60050 24.4265   2
   1  -1 -15-73.7146 50.9941   2
   1  -1 -14 294.822 98.3816   2
   1  -1 -13 493.138 119.747   2
   1  -1 -12 219.374 76.9017   2
   1  -1 -11 223.349 75.1406   2
  -1   1  11 219.452 63.1700   1
  -1   1  10 1959.39 185.637   1
  -1   1  10 1815.57 184.290   2
   1  -1 -10 1905.99 192.051   2
  -1   1  10 2177.54 224.573   6
   1  -1  -9 17.1601 21.0142   2
   1  -1  -9 3.45337 15.8515   3
  -1   1   9 14.6287 17.3326   2
  -1   1   9-15.7853 26.3549   1
  -1   1   9-10.5214 30.5599   6
  -1   1   8 276.027 68.2465   6
   1  -1  -8 198.677 64.5314   2
   1  -1  -8 190.542 58.3395   3
  -1   1   8 251.502 58.7133   2
  -1   1   7 256.205 55.3856   2
   1  -1  -7 255.301 60.6960   3
  -1   1   7 205.991 51.3176   6
  -1   1   7 307.108 64.2557   1
  -1   1   6 25735.9 567.226   6
   1  -1  -6 25481.5 544.101   3
  -1   1   6 24685.0 507.285   2
   1  -1  -6 24915.0 546.269   2
  -1   1   6 25468.2 531.892   1
  -1   1   5 288.979 56.7311   6
  -1   1   5 206.379 42.5516   2
   1  -1  -5 212.915 49.4287   2
  -1   1   5 230.702 49.1240   1
   1  -1  -5 264.806 54.3632   3
   1  -1  -4 5665.57 217.952   2
   1  -1  -4 5686.74 213.927   3
  -1   1   4 5674.11 211.895   1
  -1   1   4 5433.17 202.502   2
   1  -1  -3 624.661 59.5215   1
   1  -1  -3 532.653 61.7700   2
  -1   1   3 625.732 64.2223   2
   1  -1  -3 585.785 60.8452   3
  -1   1   3 564.534 62.5458   1
  -1   1   2 279.493 40.9140   1
  -1   1   2 267.696 38.6435   2
   1  -1  -2 232.461 33.4929   3
   1  -1  -2 288.241 38.7143   1
  -1   1   1 910.796 68.6957   2
   1  -1   1 10271.1 438.908   4
   1  -1   2 8.71064 20.5336   6
  -1   1  -2 4.46993 6.80323   3
   1  -1   3 263.924 55.9513   6
  -1   1  -3 290.718 32.8826   3
  -1   1  -4 4805.53 166.023   3
   1  -1   4 5110.84 256.758   6
  -1   1  -5 17756.1 361.714   3
   1  -1   5 18523.0 527.658   6
   1  -1   6 16110.9 532.614   6
  -1   1  -6 16135.4 386.580   3
  -1   1  -7 814.937 96.8767   3
   1  -1   7 851.394 130.397   6
   1  -1   8 1870.56 206.678   6
  -1   1  -8 1838.74 163.445   2
  -1   1  -8 1852.97 160.250   3
  -1   1  -9 447.703 85.6845   3
  -1   1  -9 496.907 91.4969   2
  -1   1  -9 555.617 104.882   6
   1  -1   9 590.690 126.438   6
  -1   1 -10 3203.33 262.517   6
  -1   1 -10 3164.94 243.853   3
  -1   1 -10 3029.60 232.580   2
  -1   1 -11 1180.87 172.287   6
  -1   1 -11 1016.12 147.183   3
  -1   1 -11 1174.68 153.121   2
  -1   1 -12 2026.89 212.126   2
  -1   1 -12 2079.79 237.591   6
  -1   1 -13 866.013 157.645   6
  -1   1 -13 774.822 138.990   2
  -1   1 -14-108.623 54.7929   2
  -1   1 -15-19.3060 28.0184   2
  -1   1 -16 236.818 95.1748   2
  -1   1 -17 15.9953 33.7660   2
   1   0 -17-123.778 69.7147   2
   1   0 -16-22.7610 33.1362   2
   1   0 -15-30.2171 34.6567   2
   1   0 -14-30.6159 35.3190   2
   1   0 -13 263.528 84.3064   2
   1   0 -12 1132.61 165.968   2
   1   0 -11 1238.53 162.524   2
  -1   0  10 4338.52 274.710   1
  -1   0  10 4354.84 328.609   6
   1   0 -10 4963.33 306.319   2
   1   0  -9 1681.40 178.736   3
  -1   0   9 1468.27 177.295   6
   1   0  -9 1554.59 161.313   2
  -1   0   9 1535.66 153.380   1
  -1   0   9 1451.81 152.908   2
  -1   0   8 825.374 119.627   6
   1   0  -8 862.021 120.979   3
  -1   0   8 705.991 98.3160   1
  -1   0   8 816.823 108.396   2
   1   0  -8 817.232 110.018   2
   1   0  -7 2294.05 182.048   3
  -1   0   7 2591.71 177.312   2
  -1   0   7 2521.80 193.576   6
  -1   0   6 10197.6 330.544   1
   1   0  -6 11118.6 350.285   2
  -1   0   6 10803.8 368.023   6
   1   0  -6 10982.9 365.091   3
  -1   0   6 10620.5 330.201   2
   1   0  -5 1598.00 127.825   3
   1   0  -5 1779.12 129.300   2
  -1   0   5 1638.66 130.352   6
  -1   0   5 1627.04 124.823   1
  -1   0   5 1573.56 116.848   2
  -1   0   4 216.862 44.6769   1
  -1   0   4 187.222 36.3351   2
  -1   0   4 190.391 39.8726   6
   1   0  -4 209.754 41.1819   2
   1   0  -4 176.764 40.0368   3
   1   0  -3 12.6267 19.0152   2
  -1   0   3 11.5326 11.7336   6
  -1   0   3 34.3684 18.6723   1
  -1   0   3 7.89342 9.47799   2
   1   0  -3 2.76447 14.4323   3
   1   0  -2 5577.22 168.696   3
  -1   0   2 5481.06 147.612   2
   1   0  -2 5583.71 152.719   2
   1   0  -2 5643.94 160.784   1
   1   0   2 3090.31 130.665   6
   1   0   3 4713.88 188.016   6
   1   0   4 5537.41 230.250   6
   1   0   5 9130.66 331.373   6
  -1   0  -5 9022.17 259.833   3
   1   0   6 2995.95 206.676   6
  -1   0  -6 2700.18 158.672   3
  -1   0  -7 63.4368 32.8587   3
   1   0   7 30.7040 30.4177   6
   1   0   8 4967.56 316.273   6
  -1   0  -8 4873.59 252.356   3
   1   0   9 1623.58 195.210   6
  -1   0  -9 1355.94 158.848   6
  -1   0  -9 1457.33 146.703   3
  -1   0  -9 1504.28 152.744   2
   1   0  10 194.854 73.7020   6
  -1   0 -10 216.880 64.2206   3
  -1   0 -10 210.002 71.3033   6
  -1   0 -10 227.373 62.5783   2
  -1   0 -11 2239.68 212.866   3
  -1   0 -11 2493.04 217.852   2
  -1   0 -11 2436.12 239.769   6
  -1   0 -12 3223.42 262.806   2
  -1   0 -13 139.886 53.2634   2
  -1   0 -14 111.058 50.2986   2
  -1   0 -15 95.4424 42.4126   2
  -1   0 -16 32.1659 36.8385   2
  -1   0 -17 44.8619 52.0832   2
   1   1 -17 24.6716 22.7008   2
   1   1 -16 28.1716 34.8742   2
   1   1 -15-26.5190 32.9104   2
   1   1 -14 37.2550 44.0111   2
   1   1 -13 300.588 87.4958   2
   1   1 -12 188.072 72.1015   2
   1   1 -11 712.134 121.714   2
  -1  -1  10 623.362 126.610   6
   1   1 -10 684.587 112.538   2
   1   1  -9 487.040 88.0744   2
   1   1  -9 582.419 113.077   3
  -1  -1   9 589.638 115.972   6
   1   1  -8 244.897 63.3266   6
  -1  -1   8 387.025 87.5180   6
   1   1  -8 290.707 68.8676   2
   1   1  -8 260.667 68.4825   3
   1   1  -7 2167.95 184.459   3
  -1  -1   7 2071.04 186.239   6
   1   1  -6 56.1405 34.3248   3
   1   1  -6 7.36606 14.8902   6
  -1  -1   6 37.1193 20.3931   2
   1   1  -6 39.6997 26.3740   2
  -1  -1   6 52.5661 31.5511   6
   1   1  -5 941.314 105.979   3
  -1  -1   5 924.274 91.9981   2
  -1  -1   5 893.417 102.551   6
   1   1  -5 907.822 89.4187   2
   1   1  -5 900.544 95.4085   6
   1   1  -4 4216.85 203.218   3
  -1  -1   4 4244.18 190.700   3
   1   1  -4 4539.64 177.450   2
  -1  -1   4 4224.28 198.326   6
   1   1  -4 4323.44 187.433   6
  -1  -1   4 4235.01 172.434   2
   1   1  -3 292.435 49.9892   3
  -1  -1   3 299.276 45.6128   6
   1   1  -3 262.736 42.4062   6
  -1  -1   3 315.792 40.5153   2
   1   1  -3 308.071 40.4204   2
   1   1  -2 3933.00 130.096   6
   1   1  -2 4231.18 123.575   2
   1   1  -2 4145.52 168.255   3
  -1  -1   2 3847.75 134.329   6
  -1  -1   2 4153.68 118.947   2
  -1  -1   1 1292.92 58.7973   6
  -1  -1   1 1325.76 48.5623   2
   1   1   3 2328.77 113.705   6
   1   1   4 231.041 42.2335   6
   1   1   5 1553.73 122.673   6
   1   1   6 1902.56 152.349   6
  -1  -1  -7 1344.01 126.700   3
   1   1   7 1478.37 147.736   6
   1   1   8 1711.30 172.644   6
  -1  -1  -8 1508.46 144.368   3
  -1  -1  -9-15.1259 23.8171   3
   1   1   9-2.39201 24.7999   6
  -1  -1 -10 623.584 104.170   3
  -1  -1 -10 547.302 99.4928   2
   1   1  10 674.154 126.187   6
  -1  -1 -11 1130.07 151.928   3
  -1  -1 -11 1222.91 157.609   2
  -1  -1 -12 49.8212 32.0232   2
  -1  -1 -13-17.6193 31.8758   2
  -1  -1 -14 7.77103 22.0322   2
  -1  -1 -15 282.285 82.0526   2
  -1  -1 -16-14.3612 25.3701   2
  -1  -1 -17-50.5291 45.6608   2
   1   2 -16-42.0352 40.7164   2
   1   2 -15 44.4883 44.4072   2
   1   2 -14 50.8370 29.9403   2
   1   2 -13 192.880 64.0944   2
   1   2 -12-45.1745 46.2352   2
   1   2 -11 2216.10 213.161   2
   1   2 -11 2440.34 243.006   6
   1   2 -10 1390.04 158.167   2
   1   2 -10 1505.01 180.840   6
   1   2  -9 692.364 105.918   2
  -1  -2   9 825.917 148.543   6
   1   2  -9 827.622 138.458   3
   1   2  -9 687.554 116.978   6
   1   2  -8 3908.04 283.921   3
   1   2  -8 3856.23 230.607   2
  -1  -2   8 3601.05 245.150   3
   1   2  -8 3845.59 253.145   6
  -1  -2   8 3859.13 295.246   6
   1   2  -7 33604.6 774.916   3
  -1  -2   7 32555.3 806.804   6
   1   2  -6 2170.77 185.999   3
   1   2  -6 2125.92 147.277   2
  -1  -2   6 2277.31 197.336   6
   1   2  -5 263.532 55.0259   6
  -1  -2   5 332.421 71.0824   6
   1   2  -5 311.347 52.7405   2
  -1  -2   5 198.679 49.7190   3
   1   2  -5 177.615 44.1122   3
  -1  -2   4 8830.97 288.667   3
   1   2  -4 9024.26 327.561   3
  -1  -2   4 8666.63 325.328   6
   1   2  -4 8997.53 247.870   2
   1   2  -4 8893.78 285.861   6
   1   2  -3 329.759 50.1396   6
  -1  -2   3 358.727 56.4835   3
   1   2  -3 333.260 42.5433   2
   1   2  -3 331.890 57.7667   3
  -1  -2   3 299.484 56.1581   6
  -1  -2   2 2731.72 147.596   6
  -1  -2   2 2888.85 149.194   3
   1   2  -2 2953.51 103.464   2
   1   2  -2 2857.13 135.044   6
  -1  -2   2 2873.50 207.256   5
   1   2  -1 2888.18 126.655   6
  -1  -2   1 2823.13 193.021   5
  -1  -2   1 2711.14 132.975   6
  -1  -2   0 2318.11 141.521   4
   1   2   1 11098.9 135.368   2
   1   2   2 13034.0 205.068   2
  -1  -2  -2 13127.6 207.075   2
  -1  -2  -3 31472.6 394.342   2
   1   2   3 31481.0 388.896   2
   1   2   4 1514.91 103.767   2
   1   2   4 1525.99 108.546   6
   1   2   5 14146.2 366.521   6
   1   2   5 14787.3 354.509   2
   1   2   6 3943.07 202.227   2
   1   2   6 4123.89 217.461   6
   1   2   7 123.394 42.2077   6
   1   2   7 119.837 40.5025   2
   1   2   8 589.227 97.5397   6
   1   2   8 698.069 101.649   2
  -1  -2  -9 436.654 85.4103   3
   1   2   9 432.697 91.1750   6
   1   2  10 62.3068 40.5695   6
  -1  -2 -10 61.6450 32.1049   3
  -1  -2 -10 92.3725 43.8844   2
  -1  -2 -11 10360.9 458.440   3
  -1  -2 -11 10057.9 447.645   2
  -1  -2 -12 2742.77 246.490   2
  -1  -2 -13 323.672 87.4404   2
   1   2  13 370.501 81.5027   1
  -1  -2 -14 272.847 78.7061   2
  -1  -2 -15 179.170 78.5427   2
  -1  -2 -16 77.8436 52.0209   2
  -1  -2 -17-11.0117 19.4453   2
   1   3 -16 22.9282 38.3079   2
   1   3 -15 79.3480 54.3494   2
   1   3 -14-2.30692 14.1707   2
   1   3 -13-44.9032 38.6453   2
   1   3 -12 88.8394 49.9191   6
   1   3 -12 106.257 52.7150   2
   1   3 -11 52.3569 22.9898   2
   1   3 -11 20.1286 29.9500   6
   1   3 -10 42.7768 29.7111   2
   1   3 -10 36.5332 37.4639   6
  -1  -3   9 911.709 170.130   6
   1   3  -9 838.910 115.889   2
   1   3  -9 772.199 139.743   3
   1   3  -9 750.125 124.374   6
  -1  -3   9 785.686 121.869   3
   1   3  -8 448.128 101.297   3
   1   3  -8 386.461 82.4583   6
   1   3  -8 361.505 72.8968   2
  -1  -3   8 410.197 104.021   6
  -1  -3   8 338.341 78.4728   3
  -1  -3   7 4190.41 252.304   3
   1   3  -7 4163.07 262.394   6
  -1  -3   7 4401.38 322.718   6
   1   3  -7 4220.99 294.595   3
  -1  -3   6 701.524 120.837   6
   1   3  -6 667.272 82.6792   2
   1   3  -6 624.320 106.803   3
  -1  -3   5 7013.70 286.489   3
   1   3  -5 7009.70 299.916   6
  -1  -3   5 7367.57 460.965   5
  -1  -3   5 7025.75 359.662   6
   1   3  -5 6994.17 245.115   2
   1   3  -4 33542.4 622.038   6
   1   3  -4 32553.6 486.361   2
  -1  -3   4 33704.9 920.390   5
  -1  -3   4 33700.6 739.241   6
  -1  -3   4 33467.1 597.617   3
  -1  -3   3 1856.65 197.435   5
  -1  -3   3 1811.63 136.069   3
   1   3  -3 1999.28 143.824   6
  -1  -3   3 1809.05 162.274   6
   1   3  -2 60.9048 26.6631   6
  -1  -3   2 96.2886 34.3811   6
  -1  -3   2 58.9873 34.2994   5
  -1  -3   1 17750.2 663.804   4
   1   3  -1 16317.0 400.209   6
  -1  -3   1 15675.6 519.037   5
   1   3   0 12174.0 187.081   2
  -1  -3   0 12783.5 469.608   4
  -1  -3   0 12531.8 444.791   5
   1   3   1 74464.2 492.122   2
  -1  -3  -1 75672.9 509.907   2
   1   3   1 76612.8 1025.09   4
   1   3   2 30398.4 344.211   2
  -1  -3  -2 30073.9 359.722   2
   1   3   3 2154.78 106.898   2
  -1  -3  -3 2351.25 113.404   2
  -1  -3  -4 3960.13 167.843   2
   1   3   4 3761.68 159.565   2
   1   3   4 4105.07 100.809   1
   1   3   5 103.727 20.9023   1
   1   3   5 117.151 34.0114   2
  -1  -3  -5 150.503 38.8290   2
   1   3   6 6966.33 262.655   2
   1   3   6 7052.97 195.987   1
   1   3   6 7020.92 290.929   6
   1   3   7 17811.3 502.107   6
   1   3   7 17348.7 348.030   1
   1   3   7 17980.3 461.549   2
   1   3   8 1034.39 117.502   2
   1   3   8 991.657 91.3399   1
   1   3   8 937.687 122.744   6
   1   3   9 696.431 105.625   2
   1   3   9 573.067 104.085   6
   1   3   9 558.929 75.5087   1
   1   3  10 211.103 67.0966   6
   1   3  10 161.101 51.7474   2
   1   3  10 114.064 35.6337   1
  -1  -3 -10 188.181 61.5699   2
  -1  -3 -11 344.998 79.8400   2
  -1  -3 -12 30.9967 18.7939   2
   1   3  12 87.2395 38.6471   1
  -1  -3 -13 5.20163 29.4552   2
   1   3  13-0.87229 9.50491   1
  -1  -3 -14 199.633 76.2368   2
  -1  -3 -15 861.249 161.320   2
  -1  -3 -16 277.085 91.1028   2
  -1  -3 -17-63.4165 51.0722   2
   1   4 -16-53.0743 45.1503   2
   1   4 -15 98.1329 58.0405   2
   1   4 -14 48.7808 39.1951   2
   1   4 -13 184.965 68.2796   2
   1   4 -13 272.001 97.1325   6
   1   4 -12 173.486 71.8718   6
   1   4 -12 60.3215 33.7396   2
   1   4 -11 203.554 62.6358   2
   1   4 -11 120.247 57.7650   6
   1   4 -10 1059.43 161.059   6
  -1  -4  10 1060.10 153.775   3
   1   4 -10 946.497 131.319   2
   1   4  -9 809.939 133.577   6
  -1  -4   9 825.682 130.026   3
   1   4  -9 649.079 102.729   2
  -1  -4   8 1875.62 247.583   6
   1   4  -8 1620.71 151.898   2
   1   4  -8 1664.45 181.897   6
  -1  -4   8 1814.80 178.443   3
  -1  -4   7 412.576 81.5121   3
   1   4  -7 388.931 84.7405   6
  -1  -4   7 354.566 124.986   5
  -1  -4   7 485.964 117.811   6
  -1  -4   6 63.5630 53.5588   5
  -1  -4   6 48.9369 27.7801   6
   1   4  -5 257.716 48.8660   2
  -1  -4   5 168.630 73.4423   5
  -1  -4   5 229.210 74.5731   6
  -1  -4   4 13426.1 408.724   3
  -1  -4   4 13194.7 531.842   6
  -1  -4   4 13474.3 627.280   5
   1   4  -4 13751.7 450.656   6
   1   4  -3 1097.10 123.409   6
  -1  -4   3 1090.47 169.657   5
  -1  -4   3 1030.17 111.308   3
  -1  -4   2 552.157 115.401   5
   1   4  -2 595.597 92.3062   6
   1   4  -2 681.204 121.361   5
  -1  -4   2 617.729 161.069   4
  -1  -4   1 6556.92 426.198   4
  -1  -4   1 6849.80 384.936   5
   1   4  -1 7359.21 384.755   5
  -1  -4   0 130150. 1640.44   5
   1   4   0 124050. 1514.67   5
  -1  -4   0 130084. 1846.56   4
   1   4   0 130311. 1768.99   4
  -1  -4  -1 1939.09 100.164   2
   1   4   1 2024.52 103.106   2
   1   4   1 2094.70 219.397   4
   1   4   1 2027.98 192.214   5
  -1  -4  -2 9768.93 247.671   2
   1   4   2 9268.16 225.396   2
  -1  -4  -3 212.569 39.3428   2
   1   4   3 204.847 36.3012   2
  -1  -4  -4 20104.0 222.755   1
   1   4   4 21363.0 394.460   2
  -1  -4  -4 21324.5 411.435   2
  -1  -4  -5 14746.3 376.742   2
   1   4   5 14788.3 355.812   2
   1   4   6 3396.91 186.979   2
   1   4   6 3609.91 139.367   1
   1   4   7 9235.18 251.209   1
   1   4   7 9508.75 334.509   2
   1   4   8 2220.83 192.202   6
   1   4   8 1975.18 162.367   2
   1   4   8 1924.95 128.046   1
   1   4   9 1439.90 164.664   6
   1   4   9 1351.74 145.839   2
   1   4   9 1282.32 114.882   1
   1   4  10 1045.51 133.923   2
   1   4  10 1001.11 109.921   1
  -1  -4 -10 1074.31 146.712   2
   1   4  10 1144.24 156.177   6
  -1  -4 -11 392.996 93.2795   2
   1   4  12 475.001 85.7793   1
  -1  -4 -12 975.153 153.591   2
   1   4  13 1153.36 145.079   1
  -1  -4 -13 1387.88 187.567   2
  -1  -4 -14 82.4311 40.0217   2
   1   4  14 19.8657 21.3891   1
  -1  -4 -15 334.010 100.292   2
  -1  -4 -16 40.9358 43.9868   2
  -1  -4 -17 125.858 69.8259   2
   1   5 -16-95.5860 59.6350   2
   1   5 -15-113.045 60.8595   2
   1   5 -14 64.9139 58.2133   6
   1   5 -14 78.9052 49.1562   2
   1   5 -13-0.71488 26.1944   2
   1   5 -13 74.0338 63.1702   6
   1   5 -12 185.177 77.1393   6
   1   5 -12 197.891 71.0624   2
   1   5 -11 89.2387 59.3804   6
   1   5 -11 32.0402 24.7072   2
   1   5 -10 52.6077 31.2742   2
   1   5 -10 40.6000 36.5093   6
  -1  -5  10 67.1386 29.2430   3
   1   5  -9 324.402 89.3782   6
   1   5  -9 405.437 83.8419   2
  -1  -5   9 390.612 86.5952   3
  -1  -5   8 2738.00 327.363   6
   1   5  -8 2630.54 200.131   2
   1   5  -8 2592.40 240.821   6
  -1  -5   8 2759.52 226.492   3
  -1  -5   7 16.3149 21.4671   3
   1   5  -7 2.74331 14.6944   2
  -1  -5   7-26.4638 43.1494   5
   1   5  -7-43.4674 36.5459   6
  -1  -5   7 4.35940 22.3019   6
  -1  -5   6 794.384 180.343   5
   1   5  -6 734.099 119.703   6
  -1  -5   6 713.065 103.738   3
  -1  -5   6 686.286 144.337   6
  -1  -5   5 8555.01 564.509   5
  -1  -5   4 733.666 161.850   5
  -1  -5   3 1249.89 130.561   3
  -1  -5   3 1539.21 216.551   5
  -1  -5   3 1485.58 291.446   4
   1   5  -3 1466.59 162.275   6
   1   5  -2 128.554 61.5175   5
  -1  -5   2 79.1295 43.4483   5
   1   5  -2 142.720 54.3625   6
  -1  -5   2 23.7712 46.9796   4
  -1  -5   1 2394.50 299.400   4
   1   5  -1 2423.71 245.136   5
  -1  -5   1 2566.73 262.777   5
   1   5   0 4976.95 182.663   2
  -1  -5   0 5271.94 367.359   5
  -1  -5   0 5379.03 433.374   4
   1   5   0 4477.42 390.110   4
   1   5   0 4860.28 331.021   5
   1   5   1 4073.28 343.477   4
   1   5   1 4511.46 179.661   2
   1   5   1 4403.47 308.804   5
   1   5   2 1463.76 216.660   4
  -1  -5  -2 1589.04 113.333   2
   1   5   2 1447.84 174.420   5
   1   5   2 1724.64 113.239   2
  -1  -5  -3 7.39294 16.9087   2
   1   5   3-6.62321 16.6634   2
  -1  -5  -4 873.759 94.3230   2
   1   5   4 849.744 86.4630   2
  -1  -5  -5 83.2868 34.4099   2
   1   5   5 82.0290 31.0544   2
  -1  -5  -5 55.1743 14.2440   1
   1   5   6 1942.11 146.046   2
  -1  -5  -6 1874.90 152.164   2
  -1  -5  -6 2148.46 93.8285   1
   1   5   7 251.208 55.6029   2
   1   5   8 2555.85 188.158   2
   1   5   8 2824.23 155.601   1
   1   5   9 2331.96 191.880   2
   1   5   9 2388.69 157.824   1
  -1  -5  -9 2287.94 202.684   2
   1   5  10 122.690 45.1938   2
   1   5  10 111.205 37.3272   1
   1   5  10 220.568 70.8591   6
  -1  -5 -10 84.4096 35.7818   2
   1   5  11 666.037 96.4972   1
  -1  -5 -11 608.270 117.711   2
  -1  -5 -12-1.70872 44.8686   2
  -1  -5 -13 2313.88 249.992   2
   1   5  13 2062.76 192.805   1
  -1  -5 -14 41.4509 23.1500   2
   1   5  14 28.2106 19.2522   1
  -1  -5 -15-8.80357 39.9382   2
  -1  -5 -16 23.8357 35.9668   2
  -1  -5 -17 312.201 106.490   2
   1   6 -15-104.649 59.3608   2
   1   6 -14 8.56384 20.8844   2
   1   6 -14-67.6235 53.6431   6
   1   6 -13-38.1510 39.5033   6
   1   6 -13-0.18377 15.4933   2
   1   6 -12 70.8511 52.2074   6
   1   6 -12 23.9661 26.1086   2
   1   6 -11 19.8343 21.8331   2
   1   6 -11-17.4211 29.5226   6
   1   6 -10 66.3915 38.4103   2
  -1  -6  10 25.5012 17.6212   3
   1   6 -10 154.584 66.2785   6
   1   6  -9 1.80872 12.7666   2
   1   6  -9 23.2452 35.5873   6
  -1  -6   9-36.3530 34.1327   3
   1   6  -8 1615.03 200.663   6
   1   6  -8 1498.64 155.865   2
  -1  -6   8 1656.62 180.671   3
  -1  -6   7 37.4698 33.5562   3
   1   6  -7 26.9427 15.8292   2
   1   6  -7 1.65868 30.4370   6
   1   6  -6 583.234 116.276   6
  -1  -6   6 473.480 89.9051   3
  -1  -6   6 444.195 146.022   5
   1   6  -5 414.670 92.7023   6
  -1  -6   5 434.002 196.005   4
  -1  -6   5 402.356 131.154   5
  -1  -6   4 753.341 168.913   5
  -1  -6   4 902.713 241.906   4
   1   6  -3 893.855 163.554   5
  -1  -6   3 796.155 204.171   4
  -1  -6   3 810.813 169.756   5
  -1  -6   2 102.723 61.7543   4
   1   6  -2 1.75787 31.2987   5
   1   6  -2 18.4648 32.9088   6
  -1  -6   2-1.86998 29.2367   5
  -1  -6   1 24933.0 899.352   5
   1   6  -1 24830.7 835.399   5
  -1  -6   1 24900.6 1102.61   4
   1   6   0 3006.92 161.606   2
  -1  -6   0 3175.67 312.208   5
   1   6   0 2895.85 330.026   4
   1   6   0 3047.00 292.845   5
  -1  -6   0 3260.30 380.748   4
   1   6   1 4020.66 322.829   5
   1   6   1 3253.48 339.681   4
   1   6   1 3631.62 181.298   2
  -1  -6  -2 1636.06 126.990   2
   1   6   2 1392.16 246.540   4
   1   6   2 1534.24 199.126   5
   1   6   2 1666.95 125.663   2
   1   6   3 1052.60 100.943   2
  -1  -6  -3 1235.64 119.011   2
   1   6   4 1089.88 107.001   2
  -1  -6  -4 1196.59 120.686   2
  -1  -6  -5 575.963 85.4639   2
   1   6   5 508.192 75.8997   2
  -1  -6  -6 9789.40 220.517   1
  -1  -6  -6 9563.72 364.357   2
   1   6   6 9703.30 344.362   2
  -1  -6  -7 5590.51 291.951   2
   1   6   7 5818.73 279.275   2
  -1  -6  -7 6164.03 179.447   1
   1   6   8 1098.84 126.980   2
  -1  -6  -8 1006.86 130.413   2
  -1  -6  -9 415.300 89.3294   2
   1   6   9 423.940 82.9172   2
   1   6  10 1130.19 144.319   2
  -1  -6 -10 1173.01 153.395   2
  -1  -6 -11 1254.58 172.037   2
   1   6  11 1315.62 134.571   1
   1   6  12 1128.48 136.863   1
  -1  -6 -12 1093.51 164.734   2
  -1  -6 -13-3.13841 30.5880   2
  -1  -6 -14 663.189 146.226   2
   1   6  14 693.465 117.805   1
  -1  -6 -15 4.90886 46.0021   2
  -1  -6 -16 38.0470 43.2305   2
  -1  -6 -17 224.928 100.032   2
   1   7 -14-39.0462 36.9909   2
   1   7 -13 2.97814 19.0526   6
   1   7 -13-25.3965 28.5176   2
   1   7 -12 58.6817 39.1670   2
   1   7 -12-3.53171 27.4111   6
   1   7 -11-28.0619 41.7204   6
  -1  -7  11 72.3314 51.2334   3
   1   7 -11-7.93033 23.6358   2
   1   7 -10 73.9243 37.2664   2
  -1  -7  10 99.3692 51.8245   3
   1   7 -10 106.872 52.3497   6
   1   7  -9 282.826 93.1892   6
  -1  -7   9 303.327 83.4034   3
   1   7  -9 376.863 87.6922   2
   1   7  -8 29.4678 13.4424   2
   1   7  -8 40.3914 18.9288   6
  -1  -7   8 60.9703 36.7850   3
   1   7  -7 4.82811 19.2455   2
  -1  -7   7 14.1446 25.8036   3
   1   7  -7 9.10448 29.9015   6
  -1  -7   6 199.807 62.6114   3
  -1  -7   6 140.695 119.272   4
   1   7  -6 136.335 60.9618   6
  -1  -7   5 1037.02 296.298   4
  -1  -7   5 819.117 199.494   5
   1   7  -5 871.760 147.660   6
  -1  -7   5 812.946 122.709   3
   1   7  -4 1268.23 179.559   6
  -1  -7   4 1374.22 247.878   5
  -1  -7   4 1111.59 277.789   4
  -1  -7   3 9.59435 72.1883   4
   1   7  -3 63.2100 40.8277   6
   1   7  -3-61.1011 60.2114   5
  -1  -7   3 89.4281 57.0840   5
  -1  -7   2 1393.29 239.767   5
  -1  -7   2 1731.98 332.223   4
   1   7  -2 1397.94 216.388   5
   1   7  -1 26054.7 916.370   5
  -1  -7   1 25343.0 1230.53   4
   1   7  -1 23013.6 500.859   2
  -1  -7   1 26447.8 1004.57   5
   1   7   0 696.368 88.2719   2
   1   7   0 694.816 179.934   4
   1   7   0 910.353 164.614   5
  -1  -7   0 732.384 166.112   5
  -1  -7   0 781.000 200.216   4
   1   7   1 2284.96 260.131   5
   1   7   1 2113.64 152.755   2
   1   7   1 1760.94 268.498   4
   1   7   2 11719.8 722.767   4
   1   7   2 12535.6 611.424   5
   1   7   2 13595.4 396.356   2
   1   7   3 8.63326 61.9732   5
   1   7   3 91.1839 85.5276   4
  -1  -7  -3 10.0938 15.5825   2
   1   7   3-9.50949 22.9058   2
   1   7   4 253.195 57.5494   2
  -1  -7  -4 275.975 63.7193   2
   1   7   5 269.666 59.9438   2
  -1  -7  -5 322.417 69.4270   2
  -1  -7  -6 287.749 45.0873   1
   1   7   6 298.880 63.7086   2
  -1  -7  -6 341.844 74.4920   2
  -1  -7  -7 61.4993 37.6067   2
  -1  -7  -7-2.42795 14.4379   1
   1   7   7 9.06937 19.0308   2
  -1  -7  -8 23.8933 20.1728   2
  -1  -7  -8 38.7449 17.6510   1
   1   7   8 17.8095 22.2836   2
  -1  -7  -9 293.470 75.0557   2
   1   7   9 331.543 74.0952   2
  -1  -7 -10 495.526 106.011   2
  -1  -7 -11 706.178 133.508   2
  -1  -7 -12 1110.38 173.885   2
  -1  -7 -13 79.2503 42.9558   2
  -1  -7 -14 1004.82 181.434   2
  -1  -7 -15 395.346 118.518   2
  -1  -7 -16 48.8998 40.4146   2
  -1  -7 -17 273.989 103.120   2
   1   8 -13 31.9630 31.6851   2
   1   8 -13 57.4257 45.7368   6
   1   8 -12 14.7102 42.5283   6
   1   8 -12 16.7349 22.6623   2
  -1  -8  11-22.3463 29.3443   3
   1   8 -11-27.0474 28.5613   2
   1   8 -11-94.1871 61.1060   6
  -1  -8  10-21.0245 30.8616   3
   1   8 -10-15.9781 33.2085   6
   1   8 -10 23.1592 24.1746   2
   1   8  -9 579.836 138.878   6
   1   8  -9 565.917 103.656   2
  -1  -8   9 425.729 99.5458   3
   1   8  -8 49.2236 40.7514   6
  -1  -8   8 12.7857 27.9033   3
   1   8  -8 5.72885 19.3920   2
   1   8  -7 580.857 98.9474   2
  -1  -8   7 599.865 113.515   3
   1   8  -7 529.737 127.680   6
  -1  -8   6 798.084 124.329   3
   1   8  -6 694.190 146.561   6
   1   8  -5 211.162 80.0746   6
  -1  -8   5 273.490 72.9764   3
  -1  -8   5 362.603 173.235   4
  -1  -8   4 2179.77 336.457   5
   1   8  -4 1977.63 241.961   6
  -1  -8   4 1739.55 185.636   3
  -1  -8   4 1297.65 321.100   4
   1   8  -3 22.3787 48.4499   5
   1   8  -3 71.1805 26.9217   6
  -1  -8   3 10.3685 43.2739   5
  -1  -8   3 85.8543 112.450   4
  -1  -8   2 3196.36 380.095   5
   1   8  -2 2605.25 278.060   6
  -1  -8   2 3275.28 493.418   4
   1   8  -2 3244.47 346.604   5
   1   8  -1 2615.13 307.655   5
   1   8  -1 2769.10 188.670   2
  -1  -8   1 3187.70 470.713   4
  -1  -8   1 2935.03 359.157   5
  -1  -8   0 241.437 117.000   4
   1   8   0 69.6804 29.8780   2
   1   8   0 102.315 67.8312   5
  -1  -8   0 142.748 78.5632   5
   1   8   1 149.187 40.5967   2
   1   8   1 178.673 86.5991   5
   1   8   2-3.93933 18.4269   2
   1   8   2-18.5896 54.2339   5
  -1  -8  -3 581.229 92.1349   2
   1   8   3 514.196 84.3140   2
   1   8   3 444.564 122.119   5
  -1  -8  -4 27.8550 22.5481   2
   1   8   4 24.2350 22.9088   2
  -1  -8  -5 1794.45 175.089   2
   1   8   5 1678.77 158.337   2
   1   8   6 2.80673 21.6898   2
  -1  -8  -6-23.1558 29.2179   2
  -1  -8  -7 111.233 42.8156   2
  -1  -8  -7 78.7862 25.7981   1
   1   8   7 102.870 40.9384   2
   1   8   8-3.17822 16.4444   2
  -1  -8  -8-0.75663 10.4896   1
  -1  -8  -8-0.70753 23.5909   2
  -1  -8  -9 473.888 103.287   2
   1   8   9 461.869 93.7270   2
  -1  -8 -10 1300.43 177.793   2
  -1  -8 -11 65.0817 43.3680   2
  -1  -8 -12 396.354 106.565   2
  -1  -8 -13 157.157 82.3762   2
  -1  -8 -14 146.625 74.1166   2
  -1  -8 -15 48.8207 54.6316   2
  -1  -8 -16 370.966 122.693   2
  -1  -8 -17 126.505 77.8133   2
   1   9 -12-16.5975 35.0817   6
   1   9 -12-35.2188 32.6804   2
  -1  -9  11 18.3293 25.3643   3
   1   9 -11 69.2185 51.5461   6
   1   9 -11-7.53547 18.2245   2
  -1  -9  10 182.308 67.4332   3
   1   9 -10 233.442 94.2097   6
   1   9 -10 157.284 65.1024   2
   1   9  -9 208.538 95.2917   6
   1   9  -9 123.418 51.7306   2
  -1  -9   9 145.312 60.4994   3
   1   9  -8 134.834 74.5950   6
   1   9  -8 60.9588 35.3551   2
  -1  -9   8 47.7041 35.8347   3
   1   9  -7 245.239 84.5280   6
  -1  -9   7 212.507 69.1864   3
  -1  -9   6 589.503 112.735   3
   1   9  -6 682.960 147.368   6
  -1  -9   5 1443.29 175.035   3
   1   9  -5 1585.83 225.381   6
  -1  -9   4 1251.06 345.540   4
   1   9  -4 1481.15 220.561   6
  -1  -9   4 1670.13 189.168   3
  -1  -9   3 194.575 136.793   4
  -1  -9   3 393.211 136.960   5
   1   9  -3 508.814 154.874   5
   1   9  -3 353.602 109.871   6
  -1  -9   2 9297.72 693.749   5
   1   9  -2 8958.25 606.646   5
   1   9  -2 7628.03 504.710   6
  -1  -9   2 9428.59 889.718   4
   1   9  -2 7677.37 344.925   2
   1   9  -1 172.293 79.8244   5
  -1  -9   1 191.246 94.7914   5
  -1  -9   1 215.716 142.593   4
   1   9  -1 152.962 48.9461   2
   1   9   0 880.909 190.613   5
   1   9   0 1096.50 270.877   4
  -1  -9   0 943.881 255.829   4
   1   9   0 993.019 121.967   2
   1   9   1 759.114 106.146   2
   1   9   1 692.354 162.521   5
   1   9   2 10.6651 27.7372   2
   1   9   2 11.3711 36.7555   5
   1   9   3 78.9835 39.7369   2
   1   9   3 67.1164 59.4904   5
   1   9   4 171.876 53.1851   2
   1   9   4 116.255 82.1123   5
  -1  -9  -4 148.918 55.5719   2
   1   9   5 216.911 60.1494   2
  -1  -9  -5 144.800 55.2222   2
   1   9   6 808.086 120.084   2
  -1  -9  -6 777.369 128.857   2
  -1  -9  -7 265.161 75.0112   2
   1   9   7 252.155 66.6105   2
  -1  -9  -7 229.952 48.1340   1
   1   9   8 470.685 98.7860   2
  -1  -9  -8 560.153 71.1342   1
  -1  -9  -8 430.422 98.1327   2
  -1  -9  -9 155.893 62.8624   2
  -1  -9  -9 143.109 35.4843   1
  -1  -9 -10 993.304 162.161   2
  -1  -9 -11 184.303 70.8233   2
  -1  -9 -12 84.4350 57.3262   2
  -1  -9 -13 774.709 159.475   2
  -1  -9 -14 60.3068 39.2041   2
  -1  -9 -15 16.9475 40.1428   2
  -1  -9 -16 183.719 87.3702   2
   1  10 -11-86.9864 64.1585   6
  -1 -10  11-15.5137 27.6156   3
   1  10 -10 59.6465 39.1987   2
  -1 -10  10 22.0187 23.8887   3
   1  10 -10-53.1185 50.4639   6
  -1 -10   9 49.3399 39.9922   3
   1  10  -9-16.7727 22.6099   2
   1  10  -9 46.4685 55.1990   6
  -1 -10   8-0.67396 24.5654   3
   1  10  -8 0.26268 48.0063   6
   1  10  -8-7.90742 17.6819   2
   1  10  -7 37.4469 44.6423   6
  -1 -10   7 37.2822 29.4242   3
  -1 -10   6 30.7121 33.9395   3
   1  10  -6-118.088 67.5593   6
   1  10  -5 216.269 70.2218   6
  -1 -10   5 161.761 61.4122   3
   1  10  -4 29.5065 36.9781   6
  -1 -10   4 51.8066 34.8138   3
   1  10  -3 1140.20 232.503   5
   1  10  -3 977.086 133.726   2
   1  10  -3 1110.87 204.306   6
   1  10  -2 4805.34 470.017   5
   1  10  -2 4422.71 280.400   2
  -1 -10   2 4709.03 681.829   4
   1  10  -2 4625.57 408.911   6
   1  10  -1 452.339 89.5089   2
   1  10  -1 319.719 128.761   5
  -1 -10   1 527.455 228.259   4
  -1 -10   1 437.414 156.304   5
   1  10   0-59.0280 73.5306   5
   1  10   0-4.95120 17.3458   2
   1  10   0-69.0518 114.666   4
   1  10   1-57.0362 32.2564   5
   1  10   1-80.2645 90.0460   4
   1  10   1 12.4205 21.0550   2
   1  10   2 303.032 72.6699   2
   1  10   2 270.742 108.770   5
   1  10   2 97.5277 83.0816   4
   1  10   3-2.39073 59.1236   5
   1  10   3 80.1449 42.8691   2
   1  10   3 46.1162 54.1089   4
   1  10   4 71.6162 37.0992   2
  -1 -10  -4 30.4138 25.0509   2
   1  10   4 152.227 99.7958   5
   1  10   4-36.7953 115.447   4
   1  10   5 38.2359 68.1255   5
   1  10   5 56.7767 38.3001   2
   1  10   5-107.511 120.789   4
  -1 -10  -5 19.3840 25.0727   2
   1  10   6 82.2172 40.2985   2
  -1 -10  -6 62.9018 38.1023   2
   1  10   7 257.873 70.0884   2
  -1 -10  -7 216.451 76.1833   2
  -1 -10  -8 2832.15 172.624   1
  -1 -10  -8 2505.53 251.664   2
  -1 -10  -9 1603.57 206.406   2
  -1 -10  -9 1357.32 115.682   1
  -1 -10 -10 138.014 64.3311   2
  -1 -10 -10 71.4842 31.4063   1
  -1 -10 -11 367.085 107.955   2
  -1 -10 -12 77.2097 48.8097   2
  -1 -10 -13 141.239 74.5783   2
  -1 -10 -14 57.4174 58.8170   2
  -1 -10 -15 38.1996 58.7876   2
  -1 -10 -16 219.924 103.977   2
  -1 -11  10-97.3754 53.7912   3
   1  11 -10 9.01640 50.9905   6
  -1 -11   9-6.00172 17.8961   3
   1  11  -9 37.1141 53.1940   6
   1  11  -9-46.9337 34.6034   2
   1  11  -8-49.5360 34.7243   2
  -1 -11   8 19.3311 25.4953   3
   1  11  -8-33.1066 38.2942   6
   1  11  -7 0.27912 47.0789   6
  -1 -11   7 45.7129 36.5462   3
   1  11  -6 211.620 90.5391   6
  -1 -11   6 165.982 64.4184   3
  -1 -11   5-9.46346 16.6242   3
   1  11  -5 0.27085 47.2101   6
   1  11  -4 97.7695 69.1280   6
  -1 -11   4 129.921 59.1648   3
   1  11  -4 22.4846 15.6721   2
   1  11  -3 306.852 76.1354   2
   1  11  -3 355.712 118.979   6
   1  11  -3 530.492 170.092   5
   1  11  -2 821.383 204.453   5
   1  11  -2 817.289 128.394   2
   1  11  -2 504.656 149.874   6
   1  11  -1 394.101 91.9566   2
   1  11  -1 214.741 108.343   5
   1  11   0 1505.21 357.868   4
   1  11   0 1203.35 154.460   2
   1  11   0 1516.13 270.779   5
   1  11   1 1867.00 195.451   2
   1  11   1 1502.00 342.324   4
   1  11   1 1468.78 265.466   5
   1  11   2 330.769 83.0470   2
   1  11   2 124.411 99.1604   4
   1  11   2 124.122 81.0720   5
   1  11   3 363.011 89.4072   2
   1  11   3 78.1184 58.4213   5
   1  11   3 251.130 127.153   4
   1  11   4 20.4564 83.6970   4
   1  11   4-20.1658 37.9583   5
   1  11   4 32.8701 31.5966   2
   1  11   5 156.547 116.164   5
  -1 -11  -5 181.822 65.3630   2
   1  11   5 109.364 70.2565   4
   1  11   5 121.281 51.4989   2
   1  11   6 299.260 135.277   5
   1  11   6 214.855 71.9318   2
   1  11   6 215.343 139.413   4
  -1 -11  -6 158.213 56.6026   2
  -1 -11  -7 73.8615 43.7323   2
  -1 -11  -8 511.213 78.4060   1
  -1 -11  -8 478.074 118.594   2
  -1 -11  -9 466.601 116.192   2
  -1 -11  -9 577.729 79.3352   1
  -1 -11 -10 37.6279 22.4841   1
  -1 -11 -10-12.4602 44.0879   2
  -1 -11 -11-6.30365 25.0459   2
  -1 -11 -12 11.2864 30.6021   2
  -1 -11 -13 415.898 124.253   2
  -1 -11 -14 244.452 106.332   2
  -1 -11 -15 43.6859 60.3442   2
  -1 -11 -16 105.236 79.8859   2
   1  12  -9 45.1310 69.2904   6
   1  12  -8 99.8851 92.1168   6
  -1 -12   8 61.3533 41.4632   3
  -1 -12   7 130.591 61.8997   3
   1  12  -7 160.277 88.8303   6
   1  12  -6 14.0247 36.0776   6
  -1 -12   6-18.2412 25.3006   3
   1  12  -5 3.81858 39.5596   6
  -1 -12   5 15.0464 21.1325   3
  -1 -12   4 34.6018 36.2772   3
   1  12  -4-175.641 88.3319   6
  -1 -12   3 713.015 141.254   3
   1  12  -3 604.023 165.399   6
   1  12  -2 101.929 87.0334   6
   1  12  -2 178.219 99.0276   5
   1  12  -2 78.6490 43.3172   2
   1  12  -1 210.364 77.6452   5
   1  12  -1 265.217 99.6347   6
   1  12  -1 281.538 80.9332   2
   1  12   0 196.766 108.853   5
   1  12   0 203.942 62.4460   2
   1  12   1 706.666 125.458   2
   1  12   1 524.398 219.961   4
   1  12   1 683.032 190.688   5
   1  12   2 947.376 224.313   5
   1  12   2 865.331 137.950   2
   1  12   3 924.998 216.978   5
   1  12   3 1112.97 159.780   2
   1  12   3 696.139 236.492   4
   1  12   4 483.820 168.406   5
   1  12   4 186.871 116.153   4
   1  12   4 667.455 124.606   2
   1  12   5 63.0300 67.5455   5
   1  12   5 139.649 70.6076   2
   1  12   6 184.698 112.223   5
  -1 -12  -6 196.374 71.3343   2
   1  12   6 171.586 150.411   4
   1  12   7 39.4002 85.7844   4
   1  12   7 131.219 112.386   5
  -1 -12  -7 168.484 71.9484   2
  -1 -12  -8 24.0220 23.9080   1
  -1 -12  -8 6.31935 30.6212   2
  -1 -12  -9 99.9835 42.6421   1
  -1 -12  -9 144.499 69.8215   2
  -1 -12 -10 12.2329 9.54165   1
  -1 -12 -10-12.3859 29.0754   2
  -1 -12 -11 239.561 91.1780   2
  -1 -12 -12-7.93382 38.5393   2
  -1 -12 -13-68.3620 56.1496   2
  -1 -12 -14 28.7471 40.7685   2
  -1 -12 -15 84.9168 65.9230   2
   1  13  -7 17.0358 57.0605   6
  -1 -13   6 140.483 61.6022   3
   1  13  -6 10.8221 37.8812   6
  -1 -13   5 138.934 61.9651   3
   1  13  -5 179.189 88.2002   6
  -1 -13   4 138.490 63.3141   3
   1  13  -4 117.706 79.6976   6
  -1 -13   3 242.796 86.6918   3
   1  13  -3 244.654 106.633   6
   1  13  -2-27.4788 45.5001   6
   1  13  -2 18.3419 36.3119   5
   1  13  -1 283.936 126.720   5
   1  13  -1 169.758 97.3004   6
   1  13   0 91.7815 78.2364   5
   1  13   1 19.6582 47.6794   5
   1  13   1-68.1859 42.6453   2
   1  13   2 9.25619 58.7221   4
   1  13   2 33.7452 58.6245   5
   1  13   2 107.756 52.2814   2
   1  13   3 254.394 134.580   5
   1  13   3 167.075 133.887   4
   1  13   4 73.4919 53.9958   5
   1  13   4 80.6036 98.2136   4
   1  13   5 240.309 161.735   4
   1  13   5 87.8896 49.3940   5
   1  13   6-175.035 110.334   5
   1  13   6 381.965 225.007   4
  -1 -13  -7 6.70172 30.9933   2
   1  13   7 98.3718 88.2996   5
   1  13   7-19.9258 69.3731   4
   1  13   8 152.237 146.385   4
   1  13   8-17.9044 55.2294   5
  -1 -13  -8 52.3254 58.5669   2
  -1 -13  -9 33.0043 16.7141   1
  -1 -13  -9 64.6400 50.9252   2
  -1 -13 -10 180.752 82.4377   2
  -1 -13 -11-5.74775 25.0945   2
  -1 -13 -12 888.972 187.861   2
  -1 -13 -13 98.0976 64.1060   2
  -1 -13 -14 19.0233 35.1838   2
   1  14  -6-25.2387 41.7520   6
   1  14  -5-4.06892 21.4368   6
  -1 -14   4 27.4908 29.6949   3
   1  14  -4-109.151 76.5632   6
   1  14  -3 76.5560 47.0798   6
  -1 -14   3 38.9622 36.0251   3
   1  14  -2 27.3416 61.8803   6
   1  14  -2-38.5868 59.9633   5
   1  14  -1 168.257 121.642   6
   1  14  -1 278.301 127.183   5
   1  14   0 94.7814 83.1709   5
   1  14   1 75.9424 75.9951   5
   1  14   2 42.8912 124.771   4
   1  14   2 182.107 116.598   5
   1  14   3 53.2741 100.924   5
   1  14   3 0.65835 100.647   4
   1  14   4 28.1236 34.9382   5
   1  14   4 33.8003 71.9889   4
   1  14   5 112.903 116.622   4
   1  14   5 129.000 97.9776   5
   1  14   6 86.0425 103.393   5
   1  14   6 138.641 81.3369   4
   1  14   7-213.714 169.527   4
   1  14   7-8.66855 46.2946   5
   1  14   8 10.7946 50.9056   5
   1  14   8-31.0859 87.1721   4
  -1 -14  -8 67.6232 57.9092   2
  -1 -14  -9 27.8341 40.9876   2
   1  14   9 73.5142 87.6273   5
  -1 -14 -10 73.5320 37.7843   2
   1  14  10-89.0111 120.204   4
  -1 -14 -11 70.3135 58.7866   2
  -1 -14 -12 62.2822 54.9852   2
  -1 -14 -13 34.8904 44.2845   2
  -1 -14 -14 139.666 82.4687   2
   1  15  -4 41.5131 70.4372   6
   1  15  -3 130.603 84.9338   6
   1  15  -2 111.223 80.6503   6
  -1 -15   2-24.0040 30.8183   3
   1  15  -1 23.9853 44.1197   6
   1  15  -1-35.9476 53.5291   5
   1  15   0-64.6352 64.8961   6
   1  15   0 226.095 125.235   5
   1  15   1-75.5415 77.6874   5
   1  15   2 56.9262 74.6003   5
   1  15   2 134.791 135.526   4
   1  15   3 20.8153 67.0185   5
   1  15   3 61.6939 113.629   4
   1  15   4 499.750 192.533   5
   1  15   4 51.5052 85.2042   4
   1  15   5 102.644 124.095   5
   1  15   5 182.025 148.385   4
   1  15   6 329.561 197.053   4
   1  15   6 264.527 154.617   5
   1  15   7 59.0248 74.5912   5
   1  15   7 262.810 190.294   4
   1  15   8-116.069 138.802   4
   1  15   8-200.130 133.819   5
   1  15   9 106.094 181.699   4
   1  15   9-96.4313 99.7907   5
  -1 -15  -9 24.7856 38.0182   2
  -1 -15 -10 0.57456 40.4281   2
   1  15  10 66.9252 85.3821   5
   1  15  10-96.9689 138.435   4
   1  15  11 450.606 307.663   4
  -1 -15 -11-152.267 82.5509   2
  -1 -15 -12 47.3878 57.0297   2
  -1 -15 -13 115.961 75.1704   2
   1  16  -1 219.907 127.173   6
   1  16  -1 73.9604 80.6069   5
   1  16   0 182.019 117.357   5
   1  16   0 92.8461 78.0458   6
   1  16   1 65.7286 112.403   5
   1  16   2-86.1500 84.7852   5
   1  16   3 80.8983 90.7779   5
   1  16   3 72.9728 118.291   4
   1  16   4-24.9455 79.2466   4
   1  16   4 102.367 87.7477   5
   1  16   5-25.3204 71.3283   4
   1  16   5-46.1273 68.6425   5
   1  16   6-185.209 124.985   5
   1  16   6-24.6065 79.7191   4
   1  16   7-43.8878 73.8978   5
   1  16   7 232.512 134.997   4
   1  16   8 304.954 169.639   5
   1  16   8 578.680 301.775   4
   1  16   9 161.851 63.2756   5
   1  16   9 477.773 277.805   4
  -1 -16 -10 277.728 115.464   2
   1  16  10 48.3199 115.200   4
  -1 -16 -11 180.753 98.5769   2
   1  16  11 52.2924 38.3346   5
   1  16  12-211.074 193.063   4
  -1 -16 -12-11.6153 32.6343   2
   1  17   0 43.6566 118.932   5
   1  17   1-47.9540 63.3822   5
   1  17   2-47.9959 68.2101   5
   1  17   3-86.3719 91.2361   5
   1  17   3 173.013 168.953   4
   1  17   4 52.3352 74.2905   5
   1  17   4 458.662 260.632   4
   1  17   5 100.901 125.672   4
   1  17   5 80.0581 87.4750   5
   1  17   6 138.134 92.8448   5
   1  17   6-20.4487 70.8596   4
   1  17   7 124.257 146.673   4
   1  17   7-120.708 106.987   5
   1  17   8 84.1712 99.4963   5
   1  17   8 114.879 132.669   4
   1  17   9 36.8774 90.7733   4
   1  17   9-15.1213 53.5965   5
   1  17  10 442.869 283.846   4
   1  18   4 43.8436 100.956   4
   1  18   5 19.7897 88.3686   4
   1  18   6-59.6423 99.9180   4
   1  18   7-71.0298 108.847   4
  -2  15  11 130.028 111.465   5
  -2  15  10 7.32302 91.4174   5
  -2  15   9-39.9731 64.4171   5
  -2  15   8-160.036 113.936   5
  -2  15   7 99.9164 88.1078   5
  -2  15   7 663.877 348.146   4
  -2  15   6 264.979 221.083   4
  -2  15   5 84.8910 126.763   4
  -2  15   4 124.800 139.257   4
  -2  15   3 361.920 229.897   4
  -2  15   2 20.2635 70.1532   4
  -2  15   1-95.1559 132.045   4
   2 -14 -10 147.962 86.1455   2
  -2  14  10-29.0866 95.3809   4
  -2  14   9-266.754 221.130   4
  -2  14   9 297.468 183.322   5
  -2  14   8 26.9795 100.694   4
   2 -14  -8 197.460 79.8095   1
  -2  14   8 356.295 161.035   5
  -2  14   7 156.093 98.8843   5
  -2  14   7 266.794 297.702   4
  -2  14   6 606.678 338.169   4
  -2  14   6 204.015 113.462   5
  -2  14   5 54.1265 36.7289   5
  -2  14   5-5.19445 82.8127   4
  -2  14   4 72.0790 174.683   4
  -2  14   4-92.9543 76.2687   5
  -2  14   3 26.8187 44.5958   5
  -2  14   3 20.2180 73.7488   4
  -2  14   2-127.529 88.1647   5
  -2  14   2-215.569 173.648   4
  -2  14   1 72.5324 45.4921   5
  -2  14   1 214.028 181.534   4
  -2  14   0-60.9637 60.8681   5
  -2  14   0-92.3361 130.158   4
  -2  14  -1 70.0404 47.2271   6
  -2  14  -2 2.80700 29.3518   6
   2 -13 -11-92.8254 68.4563   2
   2 -13 -10 36.0259 44.3714   2
   2 -13 -10 18.5128 24.7884   1
   2 -13  -9-98.5386 69.6269   2
  -2  13   9 1.12146 91.9202   4
   2 -13  -9 19.0730 27.3494   1
   2 -13  -8 107.221 52.8685   1
  -2  13   8 70.5325 74.7566   5
  -2  13   7 186.143 115.866   5
  -2  13   7 176.868 131.865   4
  -2  13   6 5.42109 33.2673   5
  -2  13   6-56.3845 111.372   4
  -2  13   5-71.7275 119.698   4
  -2  13   5-10.9828 40.5582   5
  -2  13   4 111.764 82.2594   5
  -2  13   4 107.529 138.841   4
  -2  13   3 343.309 130.485   5
  -2  13   3 362.243 219.884   4
  -2  13   2-305.047 194.583   4
  -2  13   2 83.1165 53.7420   5
  -2  13   1 100.430 81.3987   5
  -2  13   1 189.075 138.208   4
  -2  13   0-61.4336 61.0506   5
  -2  13   0 2.83002 170.160   4
  -2  13  -1 56.5503 103.234   6
  -2  13  -1 209.875 106.101   5
  -2  13  -2 7.39785 37.1203   6
  -2  13  -3-80.4689 74.7707   6
  -2  13  -4 23.3398 66.4123   6
   2 -12 -12 87.7877 71.2543   2
   2 -12 -11 53.5805 33.7664   1
   2 -12 -11 76.8825 62.1891   2
   2 -12 -10-39.7766 52.5588   2
   2 -12 -10 25.9404 29.1823   1
   2 -12  -9 84.4730 54.4710   1
   2 -12  -9 51.1066 47.9561   2
  -2  12   8 188.656 169.843   4
   2 -12  -8-0.27001 42.4056   2
   2 -12  -8 100.550 50.4616   1
  -2  12   7 416.055 264.276   4
   2 -12  -7 328.154 100.461   1
  -2  12   6 3.09413 34.1308   5
  -2  12   6 51.6883 128.602   4
  -2  12   5 344.991 133.457   5
  -2  12   5 246.223 190.216   4
  -2  12   4 430.787 151.416   5
  -2  12   4 309.015 219.039   4
  -2  12   3-175.769 156.431   4
  -2  12   3 59.3408 76.0509   5
  -2  12   2 110.748 74.0206   5
  -2  12   2-226.458 165.696   4
  -2  12   1 356.644 129.172   5
  -2  12   1-41.9710 87.9172   4
  -2  12   0 256.512 182.376   4
  -2  12   0 276.407 119.976   5
  -2  12  -1 108.868 136.017   4
  -2  12  -1 458.613 145.240   5
  -2  12  -2 92.4784 63.7872   6
  -2  12  -3-29.1302 50.3114   6
  -2  12  -4 82.8595 90.7492   6
  -2  12  -5-24.6237 43.8073   6
  -2  12  -6-67.6010 65.3114   6
   2 -11 -13 94.3535 72.3895   2
   2 -11 -12-35.4407 30.3046   1
   2 -11 -12 1.84216 20.0800   2
   2 -11 -11-4.53276 19.5925   1
   2 -11 -11-27.0641 38.8831   2
   2 -11 -10-29.0304 31.8080   1
   2 -11 -10-49.5408 47.5054   2
   2 -11  -9 425.932 95.2241   1
   2 -11  -9 489.644 135.651   2
   2 -11  -8 786.199 170.371   2
   2 -11  -8 742.466 130.841   1
   2 -11  -7 1084.01 191.100   2
  -2  11   7 616.094 312.311   4
   2 -11  -7 757.674 126.902   1
  -2  11   6-166.345 235.127   4
  -2  11   5 328.722 275.201   4
  -2  11   5 113.265 85.0310   5
  -2  11   4-10.7433 33.4461   5
  -2  11   4-280.247 194.141   4
  -2  11   3 453.944 244.941   4
  -2  11   3 53.2495 54.1090   5
  -2  11   2 78.3715 64.3840   5
  -2  11   2 45.3656 49.8479   4
  -2  11   1 55.4850 55.2252   5
  -2  11   1-57.2757 88.3042   4
  -2  11   0-9.19569 51.9210   5
  -2  11   0 119.536 107.783   4
  -2  11  -1-4.60894 24.0909   5
  -2  11  -1-302.066 194.671   4
  -2  11  -2-8.05155 38.9119   6
   2 -11   3 216.396 56.3303   3
  -2  11  -3 235.713 133.173   6
  -2  11  -4-75.8530 65.7210   6
  -2  11  -5 103.537 74.2195   6
  -2  11  -6 115.730 58.4876   6
  -2  11  -7 2.05486 27.3787   6
  -2  11  -8 36.9423 47.6627   6
   2 -10 -14-8.65672 32.1396   2
   2 -10 -13 178.850 86.9489   2
   2 -10 -12 19.4100 32.1775   2
   2 -10 -12 85.7775 48.8534   1
   2 -10 -11-42.0142 34.6514   1
   2 -10 -11-1.63057 32.8557   2
   2 -10 -10-20.7668 39.4512   2
   2 -10 -10 45.6619 20.2339   1
   2 -10  -9 431.589 91.8863   1
   2 -10  -9 483.353 130.566   2
   2 -10  -8 2908.00 244.304   1
   2 -10  -8 3409.37 335.674   2
   2 -10  -7 339.194 82.2554   1
   2 -10  -7 407.231 115.502   2
  -2  10   6 2068.06 488.883   4
   2 -10  -6 2334.94 268.797   2
  -2  10   5 2406.47 535.901   4
  -2  10   4 337.514 115.454   5
  -2  10   4 394.747 239.943   4
  -2  10   3 491.871 197.963   4
  -2  10   3 658.823 161.994   5
  -2  10   2 435.753 221.518   4
  -2  10   2 391.420 123.211   5
  -2  10   1-58.0302 88.8441   4
  -2  10   1 43.3835 45.5211   5
  -2  10   0 1193.90 212.131   5
  -2  10   0 965.513 285.750   4
  -2  10  -1 107.987 58.9082   5
  -2  10  -1 220.616 160.844   4
  -2  10  -2-9.36459 29.4550   5
  -2  10  -2 63.1460 78.0168   6
  -2  10  -2 9.07536 61.7827   4
  -2  10  -3 85.4616 89.3539   6
   2 -10   3 69.9252 32.9882   3
  -2  10  -4 82.1263 60.5881   6
   2 -10   4 211.916 111.923   5
   2 -10   4 171.969 49.4940   3
  -2  10  -5 1.59979 42.2138   6
   2 -10   5 30.4609 22.7384   3
  -2  10  -6 102.245 54.2815   6
  -2  10  -7 108.056 70.3734   6
  -2  10  -8-99.7872 70.5123   6
  -2  10  -9-34.5358 47.1692   6
   2  -9 -14 62.7974 27.5452   2
   2  -9 -13 27.6789 36.7428   2
   2  -9 -12-13.1781 31.5185   2
   2  -9 -11-4.81207 36.7301   2
   2  -9 -11-22.4784 25.6255   1
   2  -9 -10 145.773 54.6392   1
   2  -9 -10 109.163 60.7721   2
   2  -9  -9 157.708 50.8448   1
   2  -9  -9 232.338 89.3254   2
   2  -9  -8 617.164 144.441   2
   2  -9  -8 660.229 112.456   1
   2  -9  -7 1948.90 242.799   2
   2  -9  -7 1763.86 182.452   1
   2  -9  -6 434.607 111.886   2
   2  -9  -5 14.6544 52.3440   2
  -2   9   5 227.733 142.763   4
  -2   9   4-95.1325 85.6987   4
  -2   9   3 921.737 312.516   4
  -2   9   3 1009.04 190.092   5
  -2   9   2 1410.88 372.315   4
  -2   9   2 1629.64 235.086   5
  -2   9   1 530.924 130.968   5
  -2   9   1 224.019 128.896   4
  -2   9   1 549.084 117.892   2
  -2   9   0 1209.95 200.962   5
  -2   9   0 758.654 265.461   4
  -2   9  -1 90.0352 111.585   4
  -2   9  -1 142.862 74.8838   5
  -2   9  -2 729.796 163.882   5
  -2   9  -2 598.158 231.300   4
   2  -9   3 2152.92 161.837   3
  -2   9  -3 2294.81 316.129   6
   2  -9   4 435.712 70.8584   3
   2  -9   4 408.774 149.275   5
  -2   9  -4 421.043 134.801   6
  -2   9  -5 325.591 126.634   6
   2  -9   5 149.705 74.3704   5
   2  -9   5 272.455 58.0432   3
   2  -9   6 44.7999 28.9554   3
   2  -9   6-52.6198 54.3606   5
  -2   9  -6 73.2919 60.8005   6
  -2   9  -7 191.396 95.5992   6
  -2   9  -8 105.846 77.7775   6
  -2   9  -9 160.237 98.2324   6
  -2   9 -10 99.2318 80.2565   6
  -2   9 -12-56.5845 44.4707   2
   2  -8 -15-8.66138 32.2104   2
   2  -8 -14 41.3737 49.2031   2
   2  -8 -13 0.85624 36.2409   2
   2  -8 -12 158.509 77.9116   2
   2  -8 -11 403.238 85.9669   1
   2  -8 -11 311.737 102.546   2
   2  -8 -10-21.5375 33.8314   1
   2  -8 -10 27.9511 23.5808   2
   2  -8  -9 866.613 124.653   1
   2  -8  -9 792.451 151.758   2
   2  -8  -8 264.916 95.8345   2
   2  -8  -8 125.507 48.7312   1
   2  -8  -7 4027.83 332.744   2
   2  -8  -7 3951.59 264.382   1
   2  -8  -6 944.825 158.783   2
   2  -8  -6 519.599 103.907   1
  -2   8   5 33.5023 32.9084   2
   2  -8  -5 14.7969 28.7623   2
  -2   8   4 12.1956 83.2003   4
  -2   8   4 90.1558 45.7526   2
   2  -8  -4 177.948 59.2358   2
  -2   8   3 78.1320 98.7070   4
  -2   8   3-1.88824 22.8635   5
  -2   8   3-27.9455 28.0323   2
  -2   8   2 62.4340 29.5776   2
  -2   8   2 75.5172 67.8157   4
  -2   8   2 46.6311 48.8151   5
  -2   8   1 455.238 114.936   5
  -2   8   1 339.512 88.0176   2
  -2   8   1 546.729 215.240   4
  -2   8   0 84.6909 32.5475   5
  -2   8   0 102.458 50.9864   2
  -2   8   0 86.3575 109.952   4
   2  -8   1 681.843 267.015   4
  -2   8  -1 622.796 120.653   2
  -2   8  -1 468.297 201.012   4
  -2   8  -1 535.234 124.128   5
  -2   8  -2 316.455 87.9305   2
  -2   8  -2 152.233 145.667   4
  -2   8  -2 233.869 88.1695   5
   2  -8   3 353.161 61.1737   3
   2  -8   3 304.973 112.184   5
  -2   8  -3 289.793 109.521   6
   2  -8   4 3664.63 191.990   3
   2  -8   4 3180.38 364.034   5
  -2   8  -4 3599.77 376.923   6
   2  -8   5 167.078 95.3352   5
   2  -8   5 270.473 52.2681   3
  -2   8  -5 149.514 80.5731   6
   2  -8   6 27.6525 43.3579   5
   2  -8   6-1.73068 11.3937   3
  -2   8  -6 1.05886 47.4344   6
   2  -8   7 13.8099 32.2976   5
  -2   8  -7 14.9567 40.1399   6
  -2   8  -8 106.183 70.9132   6
  -2   8  -9 76.2343 48.9437   6
  -2   8 -10 314.609 118.652   6
  -2   8 -11 37.8757 45.8030   6
  -2   8 -12 2.46808 28.2201   6
  -2   8 -12-28.8573 33.6320   2
  -2   8 -13 85.8420 56.0780   2
   2  -7 -15 21.6608 54.3934   2
   2  -7 -14 107.663 70.3072   2
   2  -7 -13 243.920 91.5780   2
   2  -7 -12 68.0448 60.3913   2
   2  -7 -11 100.540 53.0898   2
   2  -7 -10 21.2183 37.4432   2
   2  -7 -10 27.6214 29.8335   1
   2  -7  -9 601.784 101.275   1
   2  -7  -9 540.901 122.085   2
   2  -7  -8 215.865 61.3571   1
   2  -7  -8 160.898 61.1514   2
   2  -7  -7 2587.82 255.147   2
   2  -7  -7 2595.23 203.890   1
  -2   7   6 489.840 102.741   2
   2  -7  -6 453.341 103.765   2
   2  -7  -6 521.875 96.2465   1
  -2   7   5 287.214 77.9906   2
   2  -7  -5 376.466 93.8600   2
   2  -7  -4 277.026 75.9803   2
  -2   7   4 238.632 67.6546   2
  -2   7   3 535.147 103.879   2
  -2   7   2 3337.93 258.304   2
  -2   7   2 3340.83 290.298   5
  -2   7   1 1929.90 199.783   2
  -2   7   1 1792.44 212.971   5
  -2   7   0 34.7923 29.2009   2
  -2   7   0 8.93416 49.2525   5
  -2   7   0 114.378 115.794   4
  -2   7  -1 36.5399 35.9108   2
  -2   7  -1 43.1171 31.2713   5
   2  -7   1 19.8308 48.2327   4
  -2   7  -1 129.714 98.0800   4
   2  -7   2 130.440 93.0855   4
  -2   7  -2 27.3203 32.2037   5
   2  -7   2 100.157 61.5542   5
  -2   7  -2 106.008 127.259   4
   2  -7   3 3402.46 576.598   4
   2  -7   3 2739.30 306.539   5
   2  -7   3 2962.64 162.916   3
  -2   7  -3 2828.57 319.172   6
   2  -7   4 1501.29 114.303   3
   2  -7   4 1421.96 226.004   5
  -2   7  -4 1603.24 238.177   6
   2  -7   5 3795.67 188.097   3
  -2   7  -5 3314.47 339.531   6
   2  -7   5 3221.56 354.452   5
   2  -7   6 64.6560 27.1331   3
   2  -7   6 112.603 78.1409   5
  -2   7  -6 85.0070 44.9721   6
   2  -7   7-61.0071 58.1220   5
  -2   7  -7-11.1710 56.9705   6
   2  -7   7 26.2450 21.3046   3
  -2   7  -8-8.45737 41.9919   6
  -2   7  -9 118.152 78.5690   6
  -2   7 -10 162.537 80.8119   6
  -2   7 -11 105.903 67.5674   6
  -2   7 -12 29.4966 32.5745   2
  -2   7 -12 40.5735 42.7961   6
  -2   7 -13 106.925 61.6974   2
  -2   7 -14 80.0561 53.9008   2
   2  -6 -16 38.4675 58.4584   2
   2  -6 -15 44.9163 36.7957   2
   2  -6 -14-81.4415 62.8627   2
   2  -6 -13-2.08063 31.5933   2
   2  -6 -12 738.863 160.863   2
   2  -6 -11-29.2010 43.5925   2
   2  -6 -10 1631.08 167.000   1
   2  -6 -10 1461.20 208.692   2
   2  -6  -9 4290.59 262.710   1
   2  -6  -9 4490.34 346.028   2
   2  -6  -8 4045.48 295.917   3
   2  -6  -8 4004.67 248.488   1
   2  -6  -8 4294.48 322.852   2
   2  -6  -7 2420.52 235.328   2
  -2   6   7 2443.26 225.879   2
   2  -6  -7 2364.48 190.508   1
   2  -6  -6 31.6550 24.5588   2
  -2   6   6 33.8435 30.1583   2
   2  -6  -6 22.7147 26.8699   1
   2  -6  -5 1146.70 127.294   1
  -2   6   5 1283.70 157.829   2
  -2   6   4 987.446 135.058   2
  -2   6   3 1994.31 190.982   2
  -2   6   2 391.571 83.9678   2
  -2   6   1 491.269 103.912   5
  -2   6   1 571.216 102.597   2
  -2   6   0 6271.26 343.371   2
  -2   6   0 5687.98 334.192   5
  -2   6  -1 4270.00 294.713   5
   2  -6   1 4520.77 584.684   4
  -2   6  -1 4434.79 294.152   2
   2  -6   2 103.335 131.672   4
  -2   6  -2 28.5001 34.8639   5
   2  -6   2 31.7123 34.2038   5
   2  -6   3 2609.51 135.628   3
   2  -6   3 2633.43 490.168   4
   2  -6   3 2516.44 263.031   5
   2  -6   4 0.42053 29.9728   5
   2  -6   4 31.2534 19.7027   3
   2  -6   4 14.1631 65.9032   4
  -2   6  -4-7.07742 39.1889   6
   2  -6   5 266.508 88.4752   5
   2  -6   5 258.302 158.838   4
   2  -6   5 360.713 52.8959   3
  -2   6  -5 249.726 87.9946   6
   2  -6   6 515.808 71.5065   3
   2  -6   6 567.645 146.272   5
  -2   6  -6 492.145 125.007   6
   2  -6   7 455.192 143.791   5
  -2   6  -7 405.219 108.671   6
  -2   6  -8 111.555 62.1885   6
   2  -6   8-66.3530 59.6029   5
  -2   6  -9 1202.18 202.152   6
  -2   6 -10 109.076 69.1094   6
  -2   6 -11 77.9010 52.8037   6
  -2   6 -11 24.0762 29.1798   2
  -2   6 -12 243.546 107.213   6
  -2   6 -12 174.263 69.2166   2
  -2   6 -13-21.6426 36.7295   6
  -2   6 -13 8.10573 23.0626   2
  -2   6 -14 75.7458 62.5358   2
   2  -5 -16 53.2133 54.1607   2
   2  -5 -15 40.0684 35.5461   2
   2  -5 -14 96.0361 68.8074   2
   2  -5 -13-79.6727 57.4210   2
   2  -5 -12 14.1545 29.5339   2
   2  -5 -11 333.676 100.617   2
   2  -5 -10 439.553 112.653   2
   2  -5  -9 707.786 133.794   2
   2  -5  -9 881.655 117.714   1
   2  -5  -8 538.085 90.7744   1
   2  -5  -8 477.623 105.975   2
  -2   5   8 628.378 111.993   2
   2  -5  -8 620.125 111.656   3
   2  -5  -7 158.891 49.6472   3
   2  -5  -7 133.828 40.9049   1
   2  -5  -7 197.010 66.7917   2
  -2   5   7 172.157 56.8225   2
   2  -5  -6 1445.32 141.166   1
  -2   5   6 1652.74 172.929   2
   2  -5  -5 868.256 107.481   1
  -2   5   5 939.095 127.899   2
  -2   5   4 1854.00 175.405   2
  -2   5   3 3656.54 243.143   2
  -2   5   2 3018.72 218.102   2
  -2   5   1 21952.5 590.854   5
  -2   5   1 22241.4 597.364   2
  -2   5   0 4613.91 275.294   2
  -2   5   0 4414.18 261.092   5
  -2   5  -1 217.908 60.2402   5
   2  -5   1 506.834 171.496   4
   2  -5   2 320.859 77.0782   5
  -2   5  -2 216.138 65.4090   5
   2  -5   2 484.664 187.992   4
   2  -5   3 4073.74 145.683   3
   2  -5   3 3701.14 291.511   5
   2  -5   3 3881.50 540.896   4
   2  -5   4 2833.48 128.577   3
   2  -5   4 2430.40 248.383   5
   2  -5   4 2398.02 425.819   4
   2  -5   5 477.059 60.2235   3
   2  -5   5 484.257 123.621   5
   2  -5   5 655.006 225.328   4
   2  -5   6 1034.06 182.829   5
  -2   5  -6 1067.44 171.358   6
   2  -5   6 1040.98 97.6748   3
   2  -5   6 925.869 285.823   4
   2  -5   7 91.8090 73.4963   5
  -2   5  -7-4.10182 31.1555   6
   2  -5   8-42.1140 49.3661   5
  -2   5  -8 7.52532 27.9897   6
   2  -5   9 234.946 105.736   5
  -2   5  -9 366.909 106.959   6
  -2   5 -10 35.4342 43.6693   6
  -2   5 -11-24.8973 49.3360   6
  -2   5 -11 50.9655 39.3494   2
  -2   5 -12 400.760 113.433   6
  -2   5 -12 401.197 105.538   2
  -2   5 -13 32.7273 31.6508   2
  -2   5 -13 104.903 66.6274   6
  -2   5 -14 130.154 83.7225   6
  -2   5 -14 113.061 62.2003   2
  -2   5 -15 105.611 69.7320   2
   2  -4 -16-27.8907 41.0088   2
   2  -4 -15 69.7800 54.3333   2
   2  -4 -14 196.868 90.2703   2
   2  -4 -13 355.054 106.088   2
   2  -4 -12 17.7820 23.6066   2
   2  -4 -11 26.8840 37.2674   2
  -2   4  11-12.9934 14.9402   1
   2  -4 -10 934.852 159.754   2
  -2   4  10 695.857 125.866   1
  -2   4   9 2.74527 20.2615   1
   2  -4  -9-47.4742 51.1045   2
   2  -4  -8 142.841 43.9904   1
   2  -4  -8 130.926 48.8859   3
  -2   4   8 144.265 56.2166   2
  -2   4   8 227.409 61.3343   1
   2  -4  -8 128.925 51.7647   2
  -2   4   7 359.690 81.6478   2
   2  -4  -7 304.267 74.7598   3
   2  -4  -7 297.743 65.5690   1
   2  -4  -6 1675.58 146.947   1
  -2   4   6 1792.45 171.865   2
   2  -4  -6 1875.33 164.548   3
  -2   4   5 5182.69 282.882   2
   2  -4  -5 5044.98 247.515   1
  -2   4   4 42.3610 29.8371   2
   2  -4  -4 5.53137 20.2218   1
  -2   4   3 4089.02 243.480   2
  -2   4   2 1408.41 139.306   2
  -2   4   1 143.614 45.6699   2
  -2   4   0 4518.76 228.231   5
  -2   4   0 5153.59 271.971   2
  -2   4  -1 5782.92 262.684   5
   2  -4   1 6180.83 594.209   4
   2  -4   2 1390.70 301.500   4
   2  -4   2 1293.25 144.870   5
   2  -4   2 1186.43 63.8654   3
   2  -4   3 498.581 42.1521   3
   2  -4   3 444.951 88.3068   5
   2  -4   3 435.261 186.350   4
   2  -4   4 723.953 123.958   5
   2  -4   4 684.268 56.0486   3
   2  -4   4 850.319 231.090   4
   2  -4   5 1815.96 355.712   4
   2  -4   5 1654.84 202.683   5
   2  -4   6 267.210 86.0522   5
   2  -4   6-1.80252 76.5717   4
  -2   4  -7 251.128 80.7811   6
   2  -4   7 222.090 172.213   4
   2  -4   7 264.706 84.0288   5
   2  -4   7 286.350 106.851   6
  -2   4  -8 596.103 125.990   6
   2  -4   8 522.542 142.737   5
  -2   4  -9 658.295 134.755   6
   2  -4   9 592.472 166.549   5
  -2   4 -10 122.412 56.1069   6
  -2   4 -11 636.991 141.050   6
  -2   4 -11 619.127 122.869   2
  -2   4 -12 297.545 107.314   6
  -2   4 -12 192.100 74.9680   2
  -2   4 -13 273.052 101.611   6
  -2   4 -13 280.505 87.8155   2
  -2   4 -14 0.26867 29.2754   6
  -2   4 -14 46.5641 36.9608   2
  -2   4 -15-76.2487 52.2510   2
  -2   4 -15 39.6760 53.7612   6
   2  -3 -16 158.723 89.2553   2
   2  -3 -15-30.4020 39.5814   2
   2  -3 -14 74.9758 55.0809   2
   2  -3 -13 1176.20 198.569   2
   2  -3 -12 922.651 169.934   2
   2  -3 -11 160.995 70.4537   2
   2  -3 -10 143.564 53.3484   2
  -2   3  10 166.408 56.0415   1
  -2   3   9 232.824 69.4176   1
  -2   3   9 164.941 62.4178   6
   2  -3  -9 119.884 52.1107   3
  -2   3   9 132.368 49.6775   2
   2  -3  -9 103.809 49.7189   2
  -2   3   8 2935.61 235.390   1
   2  -3  -8 2347.27 218.166   2
  -2   3   8 2731.17 214.957   2
   2  -3  -8 2804.18 228.087   3
  -2   3   7 735.049 107.992   2
   2  -3  -7 478.616 77.1441   1
   2  -3  -7 663.856 113.171   2
   2  -3  -7 711.907 106.890   3
  -2   3   6 40.5694 27.1106   2
   2  -3  -6 33.5342 22.2000   3
   2  -3  -6 16.8995 17.2334   1
  -2   3   6 7.31364 12.9743   1
   2  -3  -5 449.530 71.4172   1
   2  -3  -5 454.827 74.7176   3
  -2   3   5 368.933 67.4082   2
  -2   3   4 9.38500 10.3884   2
   2  -3  -4 14.0264 13.4198   3
   2  -3  -4 15.7587 24.1945   1
   2  -3  -3 530.333 73.9129   1
   2  -3  -3 519.774 66.2738   3
  -2   3   3 521.015 82.2177   2
  -2   3   2 5076.32 247.489   2
  -2   3   1 2270.58 163.622   2
  -2   3   0 2435.44 172.736   2
  -2   3   0 2240.13 130.523   5
  -2   3  -1 2318.91 128.935   5
   2  -3   1 2132.80 320.749   4
   2  -3   2 2749.60 372.929   4
   2  -3   2 2373.48 160.001   5
   2  -3   3 8006.02 643.044   4
   2  -3   3 7786.04 328.024   5
   2  -3   4 3356.81 445.513   4
   2  -3   4 3654.09 250.857   5
   2  -3   5 217.733 71.6723   5
   2  -3   5 289.088 153.905   4
   2  -3   5 203.028 78.3006   6
   2  -3   6 4516.96 369.265   6
   2  -3   6 5318.08 650.090   4
  -2   3  -6 4186.45 206.207   3
  -2   3  -7 184.502 50.2179   3
   2  -3   7 170.211 71.7303   6
  -2   3  -8 209.178 58.3377   3
  -2   3  -8 209.575 73.8975   6
   2  -3   8 138.531 72.8883   6
  -2   3  -9 988.966 156.015   6
  -2   3  -9 940.811 131.007   3
  -2   3 -10 136.215 58.6978   3
  -2   3 -10 139.613 50.4159   6
  -2   3 -10 205.408 66.5040   2
  -2   3 -11-29.0800 33.2409   2
  -2   3 -11-2.49324 18.5759   3
  -2   3 -11-19.5570 48.3672   6
  -2   3 -12-34.4131 46.9774   6
  -2   3 -12-13.5070 29.0370   2
  -2   3 -13 5.24523 33.3040   2
  -2   3 -13 52.9710 37.4796   6
  -2   3 -14 54.4353 55.8802   6
  -2   3 -14 44.7616 40.9875   2
  -2   3 -15 0.22221 17.3238   2
  -2   3 -15-80.9583 69.5525   6
  -2   3 -16-12.8781 35.4456   2
   2  -2 -16 271.414 103.174   2
   2  -2 -15 0.25109 37.1735   2
   2  -2 -14 3.90917 27.2928   2
   2  -2 -13 6.54831 33.0065   2
   2  -2 -12 35.9381 45.4014   2
   2  -2 -11 31.1006 35.1718   2
   2  -2 -10 428.928 100.496   2
  -2   2  10 618.292 115.203   1
  -2   2  10 604.604 119.228   6
   2  -2  -9 5.01294 18.8535   2
  -2   2   9-6.28076 16.0388   2
  -2   2   9 16.8366 14.1665   1
   2  -2  -9 18.7210 23.1321   3
  -2   2   9 9.11668 15.4924   6
   2  -2  -8 31.2270 27.3597   2
   2  -2  -8 45.6730 31.3826   3
  -2   2   8 99.5054 45.1090   6
  -2   2   8 82.9338 33.3173   2
  -2   2   8 17.7179 19.5432   1
   2  -2  -7 1553.77 157.624   3
  -2   2   7 1488.42 147.060   2
   2  -2  -7 1419.05 154.896   2
   2  -2  -6 3722.14 221.441   3
  -2   2   6 3784.01 234.231   1
  -2   2   6 3882.11 225.580   2
   2  -2  -6 3520.04 199.127   1
  -2   2   5 2480.69 174.035   2
  -2   2   5 2531.76 183.434   1
   2  -2  -5 2533.30 163.011   1
   2  -2  -5 2625.22 173.216   3
   2  -2  -4 16927.1 399.277   3
  -2   2   4 16691.2 427.164   1
  -2   2   4 17175.6 437.519   2
   2  -2  -4 16834.4 410.388   1
   2  -2  -3 15951.3 420.548   2
  -2   2   3 15766.8 409.960   2
   2  -2  -3 15814.7 390.563   1
   2  -2  -3 15168.7 340.802   3
   2  -2  -2 17366.8 318.897   3
   2  -2  -2 18258.2 397.379   1
  -2   2   2 18004.6 420.710   2
   2  -2  -1 13248.3 233.857   3
  -2   2   1 13349.3 355.032   2
  -2   2   0 107.023 97.6580   4
   2  -2   0 107.621 17.3122   3
  -2   2   0 137.769 39.6638   2
   2  -2   1 16850.4 792.637   4
  -2   2  -2 20353.1 563.931   6
   2  -2   2 20300.4 371.549   5
   2  -2   2 21283.5 935.537   4
   2  -2   3 389.854 150.278   4
  -2   2  -4 1813.55 93.9476   3
   2  -2   4 2258.01 358.834   4
   2  -2   4 1795.41 196.861   6
  -2   2  -5 11991.5 282.697   3
   2  -2   5 11944.0 521.876   6
  -2   2  -6 6572.50 238.865   3
   2  -2   6 6975.66 415.384   6
  -2   2  -7 386.909 64.7754   3
   2  -2   7 327.925 91.4498   6
  -2   2  -8 1979.21 160.176   3
   2  -2   8 2217.92 257.536   6
  -2   2  -9 117.309 57.1912   6
   2  -2   9 28.4138 42.2437   6
  -2   2  -9 121.610 41.5748   2
  -2   2  -9 159.569 50.9027   3
  -2   2 -10 1081.19 141.595   3
  -2   2 -10 886.315 138.928   2
  -2   2 -10 1089.43 161.573   6
  -2   2 -11 3622.17 278.798   3
  -2   2 -11 4017.09 296.953   2
  -2   2 -11 3774.80 317.707   6
  -2   2 -12 11.9217 24.0547   3
  -2   2 -12 32.1571 43.0200   6
  -2   2 -12-3.27006 26.0665   2
  -2   2 -13-2.13843 24.8395   2
  -2   2 -13-13.5153 22.8147   6
  -2   2 -14-18.7507 31.9509   6
  -2   2 -14 18.5108 31.7236   2
  -2   2 -15 104.241 65.2961   6
  -2   2 -15 109.103 58.8354   2
  -2   2 -16 271.409 102.232   2
  -2   2 -16 286.772 108.726   6
   2  -1 -16 12.0069 26.7247   2
   2  -1 -15 0.23912 18.5782   2
   2  -1 -14 231.199 90.3827   2
   2  -1 -13 565.741 131.719   2
   2  -1 -12 934.784 159.335   2
   2  -1 -11 1666.33 205.370   2
  -2   1  10 1093.60 156.381   1
  -2   1  10 1454.57 168.065   2
  -2   1  10 1657.55 196.439   6
   2  -1 -10 1260.87 168.339   2
   2  -1  -9 413.948 91.0587   2
  -2   1   9 426.004 92.5075   1
  -2   1   9 432.347 94.7494   6
  -2   1   9 415.780 84.4972   2
   2  -1  -9 462.564 98.1915   3
   2  -1  -8 257.218 67.8335   2
  -2   1   8 295.264 75.2981   1
  -2   1   8 301.600 73.1367   6
   2  -1  -8 228.061 66.8438   3
  -2   1   8 277.811 64.8735   2
  -2   1   7-10.3011 18.4661   6
   2  -1  -7-9.39415 24.0883   3
  -2   1   7 9.61231 17.8073   2
   2  -1  -6-6.64812 20.7616   3
  -2   1   6 111.385 40.5666   6
  -2   1   6 68.0037 26.8769   2
   2  -1  -5 9093.96 301.241   1
  -2   1   5 9409.06 344.504   1
   2  -1  -5 9054.54 325.457   2
  -2   1   5 9124.76 312.293   2
   2  -1  -5 9268.20 325.733   3
  -2   1   4 2481.04 164.395   1
  -2   1   4 2479.23 155.912   2
   2  -1  -4 2296.68 144.704   1
   2  -1  -4 2427.32 153.713   3
   2  -1  -4 2514.39 160.754   2
   2  -1  -3 159.846 35.2665   3
  -2   1   3 154.614 35.6244   3
   2  -1  -3 181.752 41.7784   2
  -2   1   3 169.590 47.3837   1
   2  -1  -3 94.2560 19.5669   1
  -2   1   3 173.423 38.2197   2
   2  -1  -2 2220.03 138.687   2
  -2   1   2 2334.57 118.208   3
   2  -1  -2 2281.40 138.018   1
  -2   1   2 2244.79 135.882   2
   2  -1  -2 2298.46 118.924   3
  -2   1   1 152050. 815.489   3
   2  -1  -1 152636. 859.115   3
  -2   1   1 150273. 1068.52   2
   2  -1  -1 149222. 1097.13   2
  -2   1   0 152848. 647.229   3
   2  -1   0 148938. 732.173   3
  -2   1   0 156494. 2018.72   4
  -2   1   0 150178. 1084.98   2
   2  -1   1 28323.2 898.868   4
  -2   1  -1 25025.2 796.151   4
   2  -1   2 8870.46 517.010   4
  -2   1  -2 9700.17 583.611   4
  -2   1  -2 9019.59 318.316   6
   2  -1   3 4301.84 253.840   6
  -2   1  -3 4445.29 230.710   6
   2  -1   3 5037.77 454.954   4
  -2   1  -4 64.7377 17.2838   3
   2  -1   4 103.460 45.7234   6
  -2   1  -4 46.2024 28.6127   6
  -2   1  -5 13223.1 283.488   3
   2  -1   5 13372.7 491.892   6
   2  -1   6 4385.12 298.515   6
  -2   1  -6 4430.09 184.426   3
  -2   1  -7 102.783 33.4203   3
   2  -1   7 55.9667 40.0576   6
   2  -1   8 358.064 98.1486   6
  -2   1  -8 333.232 64.2761   3
  -2   1  -9 1.75122 14.4950   3
  -2   1  -9-12.0591 27.0125   2
   2  -1   9 13.9993 24.4985   6
  -2   1  -9 7.56294 27.1452   6
  -2   1 -10 126.704 50.2263   6
  -2   1 -10 23.3318 19.6521   2
  -2   1 -10 193.887 57.0293   3
  -2   1 -11 21.2074 14.6160   3
  -2   1 -11 139.746 61.9723   6
  -2   1 -11 96.0598 45.9543   2
  -2   1 -12 7496.83 406.425   2
  -2   1 -12 6674.25 385.205   3
  -2   1 -12 7160.00 441.229   6
  -2   1 -13 147.611 75.4284   6
  -2   1 -13 220.139 74.5489   2
  -2   1 -14 84.8603 45.8458   2
  -2   1 -14 127.413 67.0005   6
  -2   1 -15 175.883 90.0315   6
  -2   1 -15 174.322 76.9811   2
  -2   1 -16-15.2831 27.7993   2
   2   0 -16 97.1343 61.3817   2
   2   0 -15 65.9810 62.8078   2
   2   0 -14 339.763 107.841   2
   2   0 -13 18.4353 46.0492   2
   2   0 -12 45.0707 39.3491   2
   2   0 -11 1249.17 166.883   2
  -2   0  10 8115.90 390.576   2
  -2   0  10 7305.34 425.416   6
   2   0 -10 7386.08 394.187   2
  -2   0   9 34.7417 34.5573   1
   2   0  -9 43.9299 29.7215   2
   2   0  -9 41.1088 30.8779   3
  -2   0   9 29.8047 25.2581   6
  -2   0   9 5.15938 14.2913   2
   2   0  -8 104.332 46.7276   2
   2   0  -8 225.018 67.5474   3
  -2   0   8 140.347 48.4979   1
  -2   0   8 229.628 56.2205   2
  -2   0   8 202.035 60.4643   6
  -2   0   7 1379.52 130.970   2
  -2   0   7 1304.92 140.603   6
   2   0  -7 1253.38 145.442   3
  -2   0   7 1310.96 145.209   1
   2   0  -6 4843.38 266.008   3
  -2   0   6 4881.63 229.743   2
   2   0  -6 4915.19 248.652   2
  -2   0   6 5026.82 253.664   6
   2   0  -5-6.37665 17.9731   3
  -2   0   5 7.46690 14.7213   6
   2   0  -5 37.3214 22.5365   2
  -2   0   5 22.7308 15.1534   2
   2   0  -4 1270.09 117.114   3
  -2   0   4 1225.53 103.374   6
  -2   0   4 1331.75 103.235   2
   2   0  -4 1268.99 108.811   2
  -2   0   3 1047.33 88.2405   2
   2   0  -3 1102.29 101.928   3
  -2   0   3 1141.78 99.5579   3
   2   0  -3 1143.88 93.9988   2
   2   0  -3 1111.57 94.1034   1
  -2   0   2 1813.75 110.677   3
   2   0  -2 1725.19 112.415   1
  -2   0   2 1929.32 111.427   2
   2   0  -2 1864.52 120.594   3
   2   0  -2 1759.58 111.243   2
   2   0  -1 51409.2 571.737   3
  -2   0   1 50598.2 526.088   3
  -2   0   1 50276.2 545.828   2
   2   0  -1 52810.2 589.001   1
   2   0  -1 51669.9 558.999   2
  -2   0   0 1370.11 78.4107   3
  -2   0   0 1408.38 90.3475   2
  -2   0   0 1378.41 92.0553   5
  -2   0  -1 18185.5 350.464   6
  -2   0  -1 17918.6 557.488   4
   2   0   1 19724.3 619.900   4
  -2   0  -2 45845.8 574.097   6
   2   0   2 44802.7 629.309   6
   2   0   2 47748.2 1086.46   4
  -2   0  -3 4373.53 191.619   6
   2   0   3 4411.95 212.566   6
   2   0   4 1243.48 122.078   6
  -2   0  -4 1377.95 116.866   6
   2   0   5 10288.9 382.419   6
   2   0   6 698.896 105.948   6
   2   0   7-7.17532 27.7169   6
  -2   0  -7 5.27845 16.5979   3
   2   0   8 987.539 144.868   6
  -2   0  -8 887.242 100.515   3
  -2   0  -9 719.520 98.1763   3
  -2   0  -9 532.163 94.0103   2
   2   0   9 660.494 130.041   6
   2   0  10 359.888 102.449   6
  -2   0 -10 397.298 82.0585   3
  -2   0 -10 443.953 91.3253   2
  -2   0 -10 524.471 106.683   6
  -2   0 -11 101.604 56.9633   6
  -2   0 -11 32.9519 23.6306   3
  -2   0 -11 51.6255 32.8285   2
  -2   0 -12-5.61623 42.0215   6
  -2   0 -12 4.17685 20.3972   2
  -2   0 -13 178.376 75.9940   6
  -2   0 -13 147.148 58.9030   2
  -2   0 -14 81.1585 49.2188   2
  -2   0 -15 35.4287 29.5823   2
  -2   0 -16 149.616 74.1395   2
  -2   0 -17 5.21302 30.4508   2
   2   1 -16-0.24719 39.3372   2
   2   1 -15 37.5658 39.2830   2
   2   1 -14 147.686 70.0383   2
   2   1 -13 21.0033 23.8291   2
   2   1 -12-14.2947 25.5611   2
   2   1 -11 334.222 87.1584   2
  -2  -1  10 2502.39 259.242   6
   2   1 -10 2621.49 228.282   2
   2   1  -9 150.220 53.7333   2
  -2  -1   9 118.090 48.3129   2
  -2  -1   9 148.715 49.9744   1
  -2  -1   9 160.548 65.9368   6
   2   1  -8 1.19688 26.2992   2
   2   1  -8 34.2969 17.0689   3
  -2  -1   8 43.5511 30.1747   2
  -2  -1   8 33.3965 29.5488   6
  -2  -1   8 11.1317 15.0826   1
  -2  -1   8 57.1726 36.4418   3
  -2  -1   7 368.111 76.2010   6
  -2  -1   7 349.572 73.8289   1
  -2  -1   7 307.806 61.4761   2
   2   1  -7 382.191 83.2968   3
   2   1  -6 681.957 106.819   3
  -2  -1   6 733.587 88.7899   2
   2   1  -6 708.323 92.5717   2
  -2  -1   6 694.056 95.9898   6
  -2  -1   5-24.0511 23.2954   6
   2   1  -5-5.84093 17.0830   3
  -2  -1   5-1.00833 10.2919   2
   2   1  -5 2.91791 11.3190   2
   2   1  -4 593.475 88.1363   3
  -2  -1   4 608.570 71.9270   6
   2   1  -4 590.905 69.9918   2
  -2  -1   4 607.808 66.0930   2
   2   1  -3 999.660 105.124   3
  -2  -1   3 980.303 78.2593   6
  -2  -1   3 915.126 73.0834   2
   2   1  -3 887.305 75.3147   2
   2   1  -2 21487.2 337.844   2
  -2  -1   2 21823.9 303.601   6
  -2  -1   2 21210.9 312.199   2
   2   1  -2 22123.0 387.491   1
   2   1  -2 21270.3 446.368   3
  -2  -1   1 17114.3 356.570   3
  -2  -1   1 18103.3 270.484   2
  -2  -1   1 17888.5 454.627   5
   2   1  -1 18173.6 275.749   2
   2   1  -1 17078.7 319.024   1
  -2  -1   1 17395.6 205.228   6
   2   1   0 14361.1 274.242   1
   2   1   0 15217.1 370.426   5
  -2  -1   0 14377.2 376.855   5
  -2  -1   0 12523.4 269.308   1
  -2  -1   0 13978.0 223.252   2
   2   1   1 14491.0 252.884   1
  -2  -1  -1 13943.5 188.127   6
   2   1   1 14077.4 345.201   5
   2   1   1 14721.0 395.615   4
  -2  -1  -1 13617.4 364.238   4
   2   1   1 14052.8 223.818   6
  -2  -1  -2 14598.3 244.969   6
   2   1   2 14219.5 261.833   6
  -2  -1  -3 0.80402 11.8066   6
   2   1   3 11.6501 12.0204   6
  -2  -1  -4 11302.2 297.519   6
   2   1   4 11096.9 316.719   6
  -2  -1  -5 26844.9 513.272   6
   2   1   5 26739.4 550.484   6
   2   1   6 704.891 99.1034   6
   2   1   7 965.011 124.387   6
   2   1   8 487.007 97.1453   6
  -2  -1  -9 4864.74 264.908   3
   2   1   9 5025.91 333.141   6
   2   1  10 1389.55 187.253   6
  -2  -1 -10 1515.10 179.115   6
  -2  -1 -10 1406.00 156.467   2
  -2  -1 -10 1619.31 159.830   3
  -2  -1 -11 9973.11 480.392   6
  -2  -1 -11 9921.18 434.492   2
  -2  -1 -11 9464.55 413.808   3
  -2  -1 -12 2141.52 218.488   2
  -2  -1 -13 260.402 79.3747   2
  -2  -1 -14 628.107 127.959   2
  -2  -1 -15-23.9728 28.6684   2
  -2  -1 -16 15.1252 35.2157   2
  -2  -1 -17-12.2404 27.5910   2
   2   2 -16 1.70958 40.1607   2
   2   2 -15 0.22235 17.1277   2
   2   2 -14 356.659 102.920   2
   2   2 -13 67.8347 39.0896   2
   2   2 -12 37.4476 26.8947   2
   2   2 -11 1602.29 187.882   2
   2   2 -10 982.713 138.863   2
  -2  -2   9 172.537 69.1724   6
  -2  -2   9 193.755 62.1860   3
   2   2  -9 169.419 61.1349   2
   2   2  -8 362.135 90.6821   3
  -2  -2   8 300.175 79.3033   6
   2   2  -8 289.020 63.2942   2
  -2  -2   8 207.517 58.6198   1
  -2  -2   8 313.456 75.4477   3
   2   2  -7 2078.86 208.027   3
  -2  -2   7 1979.32 176.209   3
  -2  -2   7 1954.93 192.619   6
   2   2  -6 155.768 53.9655   3
   2   2  -6 104.842 34.8717   2
  -2  -2   6 106.967 32.6141   2
   2   2  -6 118.145 40.4468   6
  -2  -2   6 133.076 43.7044   6
   2   2  -5 188.418 45.0931   6
   2   2  -5 153.870 52.0677   3
  -2  -2   5 196.036 41.1982   2
   2   2  -5 161.815 40.5249   2
  -2  -2   5 214.095 52.3590   6
   2   2  -4 344.549 72.1064   3
   2   2  -4 360.542 54.9855   6
  -2  -2   4 446.798 56.2085   2
   2   2  -4 413.609 54.6366   2
  -2  -2   4 411.933 66.7921   6
  -2  -2   3 373.106 54.2058   6
  -2  -2   3 406.392 45.7755   2
   2   2  -3 423.004 48.8622   2
  -2  -2   3 459.576 93.9531   5
   2   2  -3 387.077 50.3623   6
  -2  -2   2 16975.7 315.758   6
   2   2  -2 16584.1 277.076   6
  -2  -2   2 16785.2 543.016   5
   2   2  -2 16289.9 255.986   2
  -2  -2   2 16514.7 241.271   2
  -2  -2   1 10361.9 274.853   1
  -2  -2   1 10502.6 203.668   6
  -2  -2   1 10228.7 149.191   2
   2   2  -1 10976.7 401.612   5
   2   2  -1 10670.1 169.762   6
   2   2  -1 10721.0 168.175   2
  -2  -2   1 11016.6 421.974   5
  -2  -2   0 20103.9 346.092   1
  -2  -2   0 22041.6 557.478   5
   2   2   0 23002.1 564.019   5
   2   2   0 22613.9 326.240   1
   2   2   1 445078. 2375.24   5
  -2  -2  -1 440605. 2351.06   5
  -2  -2  -1 432095. 1308.33   1
   2   2   2 31067.1 312.827   1
   2   2   2 32043.6 327.724   6
  -2  -2  -3 61.2867 24.1479   2
   2   2   3 46.0319 18.5861   6
   2   2   4 931.723 83.5760   6
  -2  -2  -4 929.837 79.3994   2
  -2  -2  -4 940.892 83.1990   6
  -2  -2  -5 4561.25 195.770   2
   2   2   5 4495.35 208.648   6
  -2  -2  -5 4569.41 205.476   6
   2   2   6 8336.38 314.294   6
   2   2   7 276.390 64.8630   6
   2   2   8 4953.49 289.845   6
   2   2   9 3067.39 245.734   6
  -2  -2 -10 154.280 50.7854   2
   2   2  10 216.191 68.7221   6
  -2  -2 -11 279.397 76.2280   2
  -2  -2 -11 210.998 59.7732   3
  -2  -2 -12 5879.86 352.140   2
  -2  -2 -13 196.836 74.2792   2
  -2  -2 -14 86.9805 59.2385   2
  -2  -2 -15 114.631 54.9408   2
  -2  -2 -16-20.1104 24.6579   2
  -2  -2 -17-35.3586 47.3705   2
   2   3 -16 1.45464 16.7320   2
   2   3 -15 164.742 84.4526   2
   2   3 -14 68.2659 43.2755   2
   2   3 -13 87.0418 49.7084   2
   2   3 -12 170.915 67.5927   2
   2   3 -11 424.445 93.3771   2
   2   3 -10 203.259 73.6852   6
  -2  -3  10 150.393 64.8651   3
   2   3 -10 114.493 46.0605   2
  -2  -3   9 1156.59 184.910   6
   2   3  -9 976.677 127.795   2
   2   3  -9 865.464 134.414   6
  -2  -3   9 1064.76 150.221   3
   2   3  -8 79.7771 50.7784   3
  -2  -3   8 169.491 58.7250   3
   2   3  -8 128.805 46.2375   6
   2   3  -8 92.8703 36.7439   2
  -2  -3   8 149.905 54.7103   6
  -2  -3   7 1420.39 240.544   5
  -2  -3   7 1261.74 165.747   6
  -2  -3   7 1292.71 144.448   3
   2   3  -7 1200.35 165.898   3
  -2  -3   6 155.734 57.4172   6
   2   3  -6 186.939 47.8410   2
  -2  -3   6 148.696 63.5812   5
  -2  -3   6 68.9290 31.0158   3
  -2  -3   5 3259.16 231.682   6
  -2  -3   5 3497.83 331.710   5
   2   3  -5 3236.25 192.691   6
   2   3  -5 3512.16 175.691   2
   2   3  -4 2628.99 160.460   6
  -2  -3   4 2915.21 282.098   5
  -2  -3   4 2586.73 189.310   6
   2   3  -4 2839.60 143.027   2
  -2  -3   3 8830.28 321.567   6
  -2  -3   3 8852.37 465.469   5
   2   3  -3 9450.79 224.028   2
   2   3  -3 8816.37 264.334   6
  -2  -3   2 5.84842 28.2477   5
   2   3  -2 60.3521 16.6849   2
  -2  -3   2 29.3227 18.5699   6
   2   3  -2 38.6122 15.2732   6
   2   3  -1 10970.6 138.842   2
  -2  -3   1 11041.7 474.404   5
   2   3  -1 11200.2 252.052   6
  -2  -3   0 20187.7 618.302   5
  -2  -3   0 22767.5 510.415   4
  -2  -3  -1 463.642 47.7036   1
  -2  -3  -1 551.103 99.2392   5
  -2  -3  -2 14.0147 6.82968   1
  -2  -3  -2 43.8776 13.5232   2
  -2  -3  -3 653.320 53.9515   2
   2   3   3 572.388 55.5864   2
   2   3   4 1896.68 118.185   2
  -2  -3  -4 2047.36 113.940   2
   2   3   5 532.103 69.6404   6
  -2  -3  -5 503.860 65.8101   2
   2   3   5 566.767 69.3770   2
   2   3   6 940.901 103.453   6
   2   3   6 1045.88 104.942   2
   2   3   7 1867.75 160.719   6
   2   3   8 3601.86 239.595   6
   2   3   9 57.2869 32.0673   6
   2   3  10 66.4226 41.0177   6
  -2  -3 -10 48.5196 36.1049   2
  -2  -3 -11 81.0607 47.8554   2
  -2  -3 -12 246.674 74.3782   2
  -2  -3 -13 122.282 63.9248   2
   2   3  14-29.5970 24.5469   1
  -2  -3 -14 20.1419 30.8163   2
  -2  -3 -15 305.606 94.8365   2
  -2  -3 -16 336.737 102.628   2
  -2  -3 -17 328.035 108.027   2
   2   4 -16-49.8076 43.9874   2
   2   4 -15 68.6172 54.0376   2
   2   4 -14 210.154 74.5656   2
   2   4 -13 17.0148 12.6451   2
   2   4 -12 40.4731 21.1737   2
   2   4 -11 741.735 142.221   6
   2   4 -11 705.025 122.827   2
   2   4 -10 798.960 139.231   6
  -2  -4  10 824.273 142.065   3
   2   4 -10 801.836 123.600   2
  -2  -4   9 150.826 81.8512   6
   2   4  -9 65.1623 49.2648   6
   2   4  -9 29.0054 17.2848   2
  -2  -4   9 48.5008 47.1586   3
  -2  -4   8 23.9128 16.3346   6
  -2  -4   8 24.6733 21.0625   3
   2   4  -8 59.4972 30.8227   6
   2   4  -8 34.0651 24.9636   2
  -2  -4   7-3.89864 21.8036   6
   2   4  -7-3.81898 21.2083   6
  -2  -4   7 49.3344 50.4282   5
  -2  -4   7-0.59938 23.3309   3
  -2  -4   6 819.641 113.480   3
   2   4  -6 938.241 100.156   2
  -2  -4   6 863.299 142.685   6
  -2  -4   6 788.975 177.520   5
   2   4  -5 11.4703 14.8835   2
  -2  -4   5-1.70494 36.5482   5
   2   4  -5-8.10810 14.3441   6
  -2  -4   5-31.7910 30.3321   6
   2   4  -4 180.680 35.0998   2
  -2  -4   4 224.544 84.9297   5
   2   4  -4 223.111 52.3216   6
  -2  -4   4 205.942 60.0150   6
  -2  -4   3 3808.05 236.907   3
   2   4  -3 3833.54 143.644   2
  -2  -4   3 3603.80 329.838   5
   2   4  -3 3674.70 199.033   6
  -2  -4   3 3428.30 235.789   6
   2   4  -2 124.255 21.4979   2
   2   4  -2 118.040 33.8947   6
  -2  -4   2 161.952 65.6204   5
   2   4  -1 196.563 49.1796   6
  -2  -4   1 160.216 61.1664   5
  -2  -4   0 32566.1 750.074   4
  -2  -4   0 35887.5 913.037   5
  -2  -4  -1 1239.77 55.4858   2
   2   4   1 1327.69 49.9676   2
   2   4   1 1167.51 121.286   4
  -2  -4  -1 1159.56 160.561   5
   2   4   2 276.685 30.2946   2
  -2  -4  -2 243.453 31.2807   2
   2   4   3 6205.53 174.507   2
  -2  -4  -3 6182.96 176.595   2
  -2  -4  -4 12583.1 288.548   2
   2   4   4 12236.1 284.123   2
   2   4   5 3300.87 165.472   2
  -2  -4  -5 3410.81 167.857   2
   2   4   6 2738.39 84.0159   1
  -2  -4  -6 2725.50 168.301   2
   2   4   6 2654.48 166.870   2
   2   4   7 12337.4 411.878   6
   2   4   7 12470.0 392.117   2
   2   4   7 12882.2 234.559   1
   2   4   8 2539.43 122.512   1
   2   4   8 2774.32 209.134   6
   2   4   8 2679.66 194.204   2
   2   4   9 247.066 67.0341   6
   2   4   9 211.968 57.2760   2
   2   4   9 258.651 43.6011   1
   2   4  10 2931.03 232.603   2
  -2  -4 -10 2886.32 226.318   2
   2   4  10 2521.70 152.665   1
   2   4  10 2857.96 244.196   6
  -2  -4 -11 1507.76 172.463   2
   2   4  11 1278.59 118.182   1
  -2  -4 -12 48.1410 33.7701   2
   2   4  13 297.649 68.9262   1
  -2  -4 -13 377.933 95.3034   2
  -2  -4 -14 43.7513 28.8497   2
   2   4  14 28.4806 22.5011   1
   2   4  15-13.7509 17.6175   1
  -2  -4 -15-11.0692 22.2857   2
  -2  -4 -16 23.5706 31.0072   2
  -2  -4 -17 119.977 64.7164   2
   2   5 -15-27.5672 31.4839   2
   2   5 -14 82.0590 56.4383   2
   2   5 -13 103.260 55.1807   2
   2   5 -12 121.620 54.9262   6
   2   5 -12 69.3117 39.0340   2
  -2  -5  11 41.1880 47.4474   3
   2   5 -11-6.32460 20.4768   6
   2   5 -11-26.4090 35.2845   2
   2   5 -10 90.2629 38.4240   6
  -2  -5  10 79.9169 48.2100   3
   2   5 -10 67.2472 36.1008   2
  -2  -5   9-18.6353 34.3329   3
   2   5  -9-2.35631 31.6522   6
   2   5  -9-13.5102 22.1711   2
  -2  -5   8 184.171 94.6099   6
   2   5  -8 70.3497 35.7201   6
  -2  -5   8 81.7885 42.0928   3
   2   5  -8 123.305 41.3013   2
  -2  -5   7 399.311 88.8597   3
  -2  -5   7 424.187 118.955   6
   2   5  -7 415.357 86.4562   6
  -2  -5   6 759.558 148.984   6
   2   5  -6 506.182 90.7401   6
  -2  -5   6 619.926 102.675   3
   2   5  -6 595.233 80.3281   2
  -2  -5   6 702.229 185.241   5
  -2  -5   5 1396.21 152.959   3
  -2  -5   5 1354.20 186.719   6
   2   5  -5 1393.47 111.565   2
  -2  -5   5 1462.47 244.324   5
   2   5  -4 873.459 115.278   6
   2   5  -4 822.292 78.1620   2
  -2  -5   4 758.484 169.713   5
   2   5  -3 12.6966 18.9163   6
   2   5  -3 34.2341 10.4121   2
  -2  -5   3-0.48124 53.9375   5
  -2  -5   2 1022.51 179.932   5
   2   5  -2 1320.42 136.123   6
  -2  -5   2 1143.08 218.587   4
   2   5  -1 136.227 46.7197   6
  -2  -5   1 26.1582 33.0372   5
  -2  -5   1 113.617 68.6313   4
  -2  -5   0 42312.6 1096.00   5
  -2  -5   0 40419.2 1027.27   4
   2   5   0 38118.5 385.521   2
  -2  -5  -1 1175.25 176.065   5
   2   5   1 1137.55 65.3625   2
   2   5   1 924.611 136.143   4
   2   5   2 10178.4 209.117   2
   2   5   2 9512.42 443.717   4
  -2  -5  -2 10478.0 243.005   2
  -2  -5  -3 0.58495 12.1274   2
   2   5   3-5.99941 9.67208   2
   2   5   4 2277.78 125.706   2
  -2  -5  -4 2321.01 132.248   2
   2   5   5 859.847 86.3373   2
  -2  -5  -5 956.199 94.8935   2
  -2  -5  -6 262.398 53.4398   2
   2   5   6 263.819 50.6970   2
   2   5   7 26552.8 562.128   2
  -2  -5  -7 26328.0 576.304   2
   2   5   8 6705.68 190.543   1
   2   5   8 7012.73 338.017   6
  -2  -5  -8 6537.88 307.345   2
   2   5   8 6710.49 302.025   2
   2   5   9 1024.73 85.7365   1
   2   5   9 1103.10 143.234   6
  -2  -5  -9 1004.55 129.452   2
   2   5   9 1075.02 132.765   2
   2   5  10 81.1807 26.7280   1
   2   5  10 60.0121 30.2692   6
   2   5  10 106.672 46.4473   2
  -2  -5 -10 83.0763 35.8607   2
   2   5  11 5091.61 233.974   1
  -2  -5 -11 5557.61 338.340   2
  -2  -5 -12 247.305 75.8134   2
   2   5  12 138.968 47.3751   1
  -2  -5 -13 1010.39 156.151   2
  -2  -5 -14 14.1380 25.7451   2
   2   5  14-13.9091 24.5411   1
  -2  -5 -15 5.31029 43.5624   2
   2   5  15 0.92799 14.6730   1
  -2  -5 -16 54.9016 33.0171   2
  -2  -5 -17 83.0051 67.1442   2
   2   6 -14 96.0015 53.7498   2
   2   6 -13 119.086 68.6210   6
   2   6 -13 73.5771 45.4208   2
   2   6 -12 62.1775 57.9073   6
   2   6 -12-0.49128 13.3464   2
   2   6 -11 207.487 81.7415   6
  -2  -6  11 183.179 79.8998   3
   2   6 -11 195.659 64.8670   2
  -2  -6  10 103.565 52.3610   3
   2   6 -10 127.609 60.5737   6
   2   6 -10 63.2370 31.1623   2
   2   6  -9 39.2683 36.6300   6
  -2  -6   9-3.67539 18.8906   3
   2   6  -9 74.8827 36.7477   2
   2   6  -8 141.260 58.0094   6
   2   6  -8 88.6262 37.1254   2
  -2  -6   8 140.922 57.3533   3
   2   6  -7 768.425 129.792   6
  -2  -6   7 760.343 121.213   3
  -2  -6   7 669.731 161.677   6
  -2  -6   6 1247.80 152.886   3
   2   6  -6 1217.10 156.965   6
  -2  -6   5 449.517 93.1691   3
  -2  -6   5 595.864 167.837   5
   2   6  -5 522.796 71.3401   2
   2   6  -5 519.387 97.2505   6
  -2  -6   4 328.264 81.1915   3
  -2  -6   4 269.491 107.348   5
   2   6  -4 250.714 46.6130   2
   2   6  -3 513.017 95.5748   6
  -2  -6   3 346.822 134.741   4
  -2  -6   3 341.126 113.855   5
   2   6  -2 740.204 117.580   6
  -2  -6   2 860.783 182.082   5
  -2  -6   2 655.528 162.556   4
  -2  -6   1 3937.07 372.133   5
   2   6  -1 3652.32 257.146   6
  -2  -6   1 3396.51 360.997   4
  -2  -6   0 10542.6 599.864   5
   2   6   0 9808.25 241.091   2
  -2  -6   0 10495.6 612.778   4
  -2  -6  -1 825.072 161.816   5
   2   6   1 892.484 73.0254   2
   2   6   1 660.464 130.930   4
  -2  -6  -2 4181.69 171.345   2
   2   6   2 4406.37 162.496   2
   2   6   2 3600.43 314.851   4
   2   6   3 2267.89 124.011   2
  -2  -6  -3 2283.11 140.329   2
  -2  -6  -4 244.805 48.5888   2
   2   6   4 250.738 44.1248   2
   2   6   5 457.224 65.2841   2
  -2  -6  -5 447.502 68.8748   2
   2   6   6 328.434 58.4383   2
  -2  -6  -6 252.739 59.5917   2
   2   6   7 184.256 47.6793   2
  -2  -6  -7 204.489 51.9146   2
  -2  -6  -8 70.0976 34.1639   2
   2   6   8 68.4928 30.4921   2
   2   6   9 13.4099 19.0058   2
  -2  -6  -9 12.7817 29.8122   2
   2   6  10 14.1365 20.2938   2
  -2  -6 -10 29.5080 27.7867   2
   2   6  10 25.5622 19.5110   1
   2   6  10 2.69986 18.8570   6
   2   6  11 1889.09 143.087   1
  -2  -6 -11 1888.13 199.695   2
  -2  -6 -12 1661.28 198.177   2
   2   6  12 1812.52 151.374   1
  -2  -6 -13 139.976 58.8937   2
   2   6  13 79.1983 37.7758   1
  -2  -6 -14-34.2516 35.0482   2
  -2  -6 -15-43.8670 51.9976   2
  -2  -6 -16 68.2705 50.5709   2
  -2  -6 -17 28.4752 18.9802   2
   2   7 -14 59.5360 34.5256   6
   2   7 -13 1.56857 18.4586   6
   2   7 -13-43.3363 35.9490   2
   2   7 -12 114.733 71.2939   6
   2   7 -12 80.1249 47.7249   2
   2   7 -11 46.1584 36.6227   2
  -2  -7  11-15.8532 37.0637   3
   2   7 -11 1.98527 26.6233   6
  -2  -7  10 98.0873 45.5854   3
   2   7 -10 67.5645 40.5116   2
   2   7 -10 156.769 70.0303   6
   2   7  -9 149.164 66.7486   6
  -2  -7   9 156.106 60.8461   3
   2   7  -9 85.0080 42.6771   2
   2   7  -8 1487.34 194.606   6
  -2  -7   8 1839.14 203.542   3
   2   7  -8 1715.41 160.639   2
  -2  -7   7 585.946 111.645   3
   2   7  -7 476.931 79.8878   2
   2   7  -7 571.513 120.112   6
   2   7  -6-23.0994 33.5941   6
  -2  -7   6-18.0464 32.1395   3
   2   7  -5 263.880 75.4068   6
   2   7  -5 228.068 48.3144   2
  -2  -7   5 351.050 159.322   4
  -2  -7   5 225.443 71.9625   3
  -2  -7   4 1369.54 171.132   3
   2   7  -4 1288.25 169.290   6
  -2  -7   4 1241.87 241.202   5
  -2  -7   4 1608.56 337.328   4
   2   7  -3 254.453 96.2382   5
  -2  -7   3 252.484 98.5355   5
  -2  -7   3 154.933 104.159   4
   2   7  -2 448.054 126.317   5
  -2  -7   2 523.143 146.078   5
  -2  -7   2 439.996 155.839   4
  -2  -7   1 13290.2 734.405   5
   2   7  -1 12422.1 316.810   2
  -2  -7   1 12606.8 786.409   4
   2   7  -1 12596.8 521.282   6
   2   7  -1 12907.1 671.571   5
  -2  -7   0 188.362 88.5714   5
   2   7   0 152.045 32.4361   2
  -2  -7   0 136.573 99.3159   4
   2   7   1 4647.72 195.160   2
  -2  -7  -1 4423.98 400.703   5
   2   7   1 3848.33 375.009   4
   2   7   2 3304.52 330.196   4
   2   7   2 4159.00 184.252   2
   2   7   3 485.883 136.204   4
   2   7   3 673.010 76.8826   2
  -2  -7  -3 647.656 80.7536   2
   2   7   4 5829.20 231.992   2
  -2  -7  -4 5915.23 263.225   2
   2   7   5 4576.34 216.247   2
  -2  -7  -5 4526.74 238.741   2
   2   7   6 4205.99 222.264   2
  -2  -7  -6 4147.08 104.067   1
  -2  -7  -6 4024.19 232.973   2
   2   7   7 5803.97 273.567   2
  -2  -7  -7 5524.72 287.264   2
   2   7   8 314.788 65.9260   2
  -2  -7  -8 273.440 71.0198   2
  -2  -7  -9 299.432 75.2145   2
   2   7   9 380.733 79.5229   2
  -2  -7 -10 942.900 138.985   2
   2   7  10 794.153 120.593   2
  -2  -7 -11 32.6779 25.2443   2
  -2  -7 -12-67.2686 54.2538   2
  -2  -7 -13 386.052 107.296   2
  -2  -7 -14-26.5054 48.2057   2
   2   7  14-13.8877 17.8243   1
  -2  -7 -15-25.9614 34.7907   2
  -2  -7 -16 7.18369 30.7446   2
  -2  -7 -17-42.2274 34.3322   2
   2   8 -13 99.9594 64.9633   6
   2   8 -12-31.5636 38.1810   6
  -2  -8  12 19.9203 30.7350   3
   2   8 -12-23.1356 26.8334   2
  -2  -8  11-68.6155 52.1451   3
   2   8 -11-63.5294 49.0478   6
   2   8 -11 65.6271 39.0742   2
  -2  -8  10 21.2410 35.3612   3
   2   8 -10 61.5125 49.6127   6
   2   8 -10 4.69121 14.8154   2
   2   8  -9 36.7374 24.4493   6
  -2  -8   9 48.3108 38.0621   3
   2   8  -9 2.84033 11.9162   2
  -2  -8   8 12.7767 23.0690   3
   2   8  -8 18.5492 24.0397   6
   2   8  -8 14.2815 18.4342   2
  -2  -8   7-10.0232 37.0534   3
   2   8  -7 39.5307 27.8963   2
   2   8  -7 73.7452 52.2519   6
  -2  -8   6 302.549 84.3177   3
   2   8  -6 228.995 83.3395   6
  -2  -8   5 65.5447 37.8096   3
   2   8  -5 94.7924 48.8135   6
  -2  -8   4 1599.06 194.550   3
   2   8  -4 1713.44 209.408   6
  -2  -8   4 1326.15 304.293   4
   2   8  -3 1340.66 186.290   6
   2   8  -3 1346.67 238.907   5
  -2  -8   3 1348.81 260.561   5
  -2  -8   3 1153.27 284.655   4
  -2  -8   2 5201.70 501.417   5
   2   8  -2 5069.44 444.288   5
  -2  -8   2 4480.41 530.824   4
  -2  -8   1 5784.31 515.215   5
   2   8  -1 5584.65 235.496   2
   2   8  -1 5963.10 476.806   5
  -2  -8   1 5857.22 587.358   4
  -2  -8   0 327.777 128.749   5
   2   8   0 502.920 70.5075   2
  -2  -8   0 531.848 178.197   4
   2   8   0 446.106 126.768   5
   2   8   1 38.1654 23.7568   2
   2   8   1 37.6988 43.6819   5
   2   8   1 93.5231 85.8683   4
   2   8   2 15.0160 17.4707   2
   2   8   2 48.2678 61.5689   5
   2   8   2-33.4486 32.6362   4
  -2  -8  -3 3380.71 195.585   2
   2   8   3 3052.79 334.764   5
   2   8   3 3317.49 185.481   2
   2   8   3 2975.44 363.316   4
  -2  -8  -4 140.439 44.4564   2
   2   8   4 109.779 38.4753   2
   2   8   4-18.9338 60.3026   4
   2   8   5 1346.12 125.577   2
  -2  -8  -5 1279.42 139.947   2
   2   8   6 13187.9 413.196   2
  -2  -8  -6 13561.9 459.332   2
   2   8   7 8293.87 342.951   2
  -2  -8  -7 8098.79 165.186   1
  -2  -8  -7 8086.70 369.274   2
   2   8   8 1096.74 132.382   2
  -2  -8  -8 1004.08 137.460   2
   2   8   9 228.697 62.4924   2
  -2  -8  -9 206.896 64.6140   2
  -2  -8 -10 2017.77 207.599   2
  -2  -8 -11 4.12264 31.9775   2
  -2  -8 -12 42.0986 38.8413   2
  -2  -8 -13 185.555 74.4345   2
  -2  -8 -14 58.8500 29.8255   2
  -2  -8 -15 126.195 66.6274   2
  -2  -8 -16 70.2363 50.9865   2
  -2  -8 -17 49.3551 56.6007   2
   2   9 -12 74.7786 64.0515   6
  -2  -9  12 195.018 83.1117   3
  -2  -9  11-63.1663 46.1705   3
   2   9 -11-29.0856 38.5923   6
   2   9 -11-14.7398 21.7951   2
  -2  -9  10 61.7795 44.5418   3
   2   9 -10 39.3214 30.5641   2
   2   9  -9 114.247 69.7792   6
   2   9  -9 54.3005 32.7694   2
  -2  -9   9 121.462 58.1473   3
  -2  -9   8 195.318 70.2229   3
   2   9  -8 329.322 105.297   6
   2   9  -8 203.484 61.3458   2
   2   9  -7 265.598 91.5600   6
   2   9  -7 210.121 57.1414   2
  -2  -9   7 152.054 58.8581   3
   2   9  -6 34.2506 48.4002   6
   2   9  -6 30.2072 21.7806   2
  -2  -9   6 15.8044 28.1404   3
  -2  -9   5 124.953 54.6076   3
   2   9  -5 202.090 77.5742   6
   2   9  -4 223.818 85.3202   6
  -2  -9   4 187.146 72.3008   3
  -2  -9   4 77.6237 87.8807   4
   2   9  -3-25.6289 43.9825   6
   2   9  -3-28.7854 64.4921   5
  -2  -9   3-92.3740 93.6871   4
   2   9  -2-4.32435 12.6152   2
  -2  -9   2 33.3624 55.0975   5
  -2  -9   2-32.5061 51.4934   4
   2   9  -2-36.4975 64.6478   5
   2   9  -2-24.5627 38.5910   6
  -2  -9   1 697.567 191.586   5
   2   9  -1 832.615 190.736   5
   2   9  -1 607.855 131.753   6
  -2  -9   1 1023.81 277.534   4
   2   9  -1 848.392 102.189   2
   2   9   0 279.268 56.8297   2
  -2  -9   0 197.544 107.975   4
   2   9   0 217.237 96.6442   5
  -2  -9   0 238.147 101.262   5
   2   9   1 827.105 182.936   5
   2   9   1 989.035 110.174   2
   2   9   2 22.6200 18.1912   2
   2   9   2 16.0753 50.3965   5
   2   9   3 1792.97 149.884   2
   2   9   3 1464.63 242.343   5
  -2  -9  -4 1117.54 128.401   2
   2   9   4 980.728 196.614   5
   2   9   4 1048.38 115.516   2
   2   9   5 73.4533 29.4457   2
   2   9   5 16.9406 37.1932   5
  -2  -9  -5 125.135 49.0027   2
   2   9   6 797.830 108.190   2
  -2  -9  -6 782.405 120.353   2
  -2  -9  -7 219.746 64.2270   2
  -2  -9  -7 309.240 42.4829   1
   2   9   7 328.766 73.6432   2
   2   9   8 1800.80 175.392   2
  -2  -9  -8 1869.81 86.8843   1
  -2  -9  -8 1582.85 180.148   2
   2   9   9 1219.02 148.166   2
  -2  -9  -9 1024.13 150.349   2
  -2  -9 -10 2244.67 229.901   2
  -2  -9 -11 260.717 85.2795   2
  -2  -9 -12-27.3762 30.8222   2
  -2  -9 -13 1005.95 175.903   2
  -2  -9 -14 383.202 114.483   2
  -2  -9 -15 80.4425 69.3591   2
  -2  -9 -16-24.0072 34.3541   2
  -2  -9 -17 5.01855 24.3359   2
  -2 -10  12-7.50206 19.9501   3
  -2 -10  11-0.45412 15.5984   3
   2  10 -11 0.27860 46.7867   6
   2  10 -10 72.0665 54.9537   6
  -2 -10  10 3.13289 39.1211   3
  -2 -10   9 54.8573 46.2846   3
   2  10  -9 90.1207 42.7377   2
   2  10  -9 115.560 65.4485   6
  -2 -10   8 76.5203 54.5956   3
   2  10  -8 103.967 66.9783   6
   2  10  -8 60.2366 34.9414   2
   2  10  -7-6.62824 34.2039   6
   2  10  -7 13.7625 17.5800   2
  -2 -10   7-65.8595 43.7741   3
  -2 -10   6 85.3416 54.1150   3
   2  10  -6 52.9830 47.2979   6
   2  10  -6-35.7861 24.8057   2
   2  10  -5 16.1343 37.9490   6
  -2 -10   5 114.499 58.1344   3
  -2 -10   4 18.5229 30.5900   3
   2  10  -4-206.372 83.4616   6
   2  10  -3 26.2626 23.6709   2
   2  10  -3 14.7853 72.0269   5
  -2 -10   3 190.833 170.215   4
   2  10  -3 29.0865 25.2850   6
   2  10  -2 213.771 82.9697   6
   2  10  -2 138.844 81.6549   5
  -2 -10   2 122.041 107.269   4
   2  10  -2 176.527 50.2106   2
   2  10  -1-0.67520 39.1958   6
   2  10  -1-14.4132 55.8537   5
  -2 -10   1 47.7136 40.6638   4
   2  10  -1 9.33385 20.1373   2
   2  10   0 3035.75 377.391   5
   2  10   0 3003.18 208.183   2
   2  10   1 1054.50 214.772   5
   2  10   1 1092.21 127.263   2
   2  10   2-0.82018 15.6171   2
   2  10   2 10.6927 33.1692   5
   2  10   3 8.94950 11.0762   2
   2  10   3 17.7137 48.5316   5
   2  10   4 66.1546 38.9901   5
  -2 -10  -4 34.3797 27.8924   2
   2  10   4 8.27192 17.3583   2
  -2 -10  -5 662.493 111.469   2
   2  10   5 662.173 100.931   2
   2  10   5 613.263 171.682   5
   2  10   5 372.068 169.777   4
   2  10   6 2849.79 219.969   2
  -2 -10  -6 2797.27 244.124   2
  -2 -10  -7 125.448 53.9624   2
   2  10   7 154.229 50.2644   2
  -2 -10  -8 1341.35 90.3580   1
   2  10   8 1504.86 167.902   2
  -2 -10  -8 1424.56 180.707   2
  -2 -10  -9 29.4289 45.0647   2
  -2 -10 -10 20.3831 40.3368   2
  -2 -10 -11 216.506 73.7481   2
  -2 -10 -12 396.162 109.455   2
  -2 -10 -13 2.25552 26.8927   2
  -2 -10 -14 102.946 61.5816   2
  -2 -10 -15-20.1636 33.2492   2
  -2 -10 -16-67.2293 56.3699   2
  -2 -10 -17 66.4232 57.7674   2
  -2 -11  11 176.781 78.5925   3
   2  11 -10-5.33144 24.1577   6
  -2 -11  10 0.43584 16.5227   3
  -2 -11   9-22.6848 42.5226   3
   2  11  -9 29.0222 37.5760   6
  -2 -11   8 27.4815 30.2547   3
   2  11  -8 67.4056 68.0760   6
   2  11  -7 5.63314 20.4620   2
   2  11  -7 39.5717 49.1121   6
  -2 -11   6-20.4333 27.4722   3
   2  11  -6 61.3310 28.7929   2
   2  11  -6 59.3496 40.1519   6
   2  11  -5-45.8764 45.6977   6
  -2 -11   5 45.1261 40.9107   3
  -2 -11   4 18.0402 25.5379   3
   2  11  -4-67.8035 36.4828   2
   2  11  -3 167.671 77.9988   6
   2  11  -3 167.616 59.1849   5
   2  11  -3 149.850 48.3169   2
   2  11  -2 1924.97 182.158   2
   2  11  -2 2267.18 289.078   6
   2  11  -2 2500.26 366.073   5
  -2 -11   2 2213.89 462.786   4
   2  11  -1 10.0719 34.5861   6
   2  11  -1 91.3198 76.1362   5
   2  11  -1 29.4748 22.0236   2
  -2 -11   1-54.5326 110.544   4
   2  11   0 307.902 134.376   5
   2  11   0 270.026 67.7097   2
   2  11   1 710.437 111.055   2
   2  11   1 647.933 180.429   5
   2  11   1 734.578 233.562   4
   2  11   2 179.662 93.9046   5
   2  11   2 239.623 64.3461   2
   2  11   2 195.995 123.530   4
   2  11   3 114.188 64.3699   5
   2  11   3 68.7090 29.6005   2
   2  11   3 30.8248 52.5313   4
   2  11   4 172.293 116.819   4
   2  11   4 146.827 50.6314   2
   2  11   4 96.6414 81.4457   5
   2  11   5 1573.33 354.962   4
   2  11   5 1617.18 295.835   5
  -2 -11  -5 1711.57 185.533   2
   2  11   5 1600.99 172.555   2
   2  11   6 2284.00 360.384   5
  -2 -11  -6 2356.34 231.156   2
   2  11   6 1950.16 388.493   4
   2  11   6 2141.07 201.341   2
   2  11   7 1291.47 159.709   2
  -2 -11  -7 1325.04 180.199   2
   2  11   8 737.296 122.323   2
  -2 -11  -8 616.286 71.6013   1
  -2 -11  -8 717.827 136.244   2
  -2 -11  -9 5972.19 398.163   2
  -2 -11  -9 6473.56 200.586   1
  -2 -11 -10-0.38702 24.9099   2
  -2 -11 -11 305.523 94.3739   2
  -2 -11 -12 435.662 118.225   2
  -2 -11 -13 94.0907 53.2047   2
  -2 -11 -14 128.290 71.0194   2
  -2 -11 -15 46.3433 60.4238   2
  -2 -11 -16 110.981 71.8777   2
  -2 -12   9 39.9752 37.5307   3
   2  12  -9 104.393 79.2727   6
  -2 -12   8-1.23519 15.8404   3
   2  12  -8 59.4108 71.5237   6
  -2 -12   7 50.2497 48.1477   3
   2  12  -7 51.8076 50.1350   6
   2  12  -6 55.7423 32.5252   2
  -2 -12   6 0.40112 18.9662   3
   2  12  -6-29.9548 44.9491   6
   2  12  -5-103.664 66.0878   6
  -2 -12   5 42.0638 50.6214   3
   2  12  -4 7.59337 34.9313   6
  -2 -12   4-13.9843 30.4125   3
  -2 -12   3-18.7005 30.2008   3
   2  12  -3 54.0609 41.3507   6
   2  12  -2 316.011 111.198   6
   2  12  -2 213.936 96.7596   5
   2  12  -2 292.764 76.4550   2
   2  12  -1 907.339 192.561   6
   2  12  -1 1254.00 261.729   5
   2  12  -1 999.752 136.504   2
   2  12   0 123.527 51.4055   2
   2  12   0-9.58712 41.0004   5
   2  12   1 28.5649 27.2684   2
   2  12   1-71.6208 86.0045   5
   2  12   2 1161.54 151.478   2
   2  12   2 784.906 209.842   5
   2  12   2 766.574 239.192   4
   2  12   3 813.408 214.960   5
   2  12   3 847.874 128.094   2
   2  12   3 643.104 211.930   4
   2  12   4 218.344 106.926   5
   2  12   4 76.9860 87.0938   4
   2  12   4 358.288 82.8154   2
   2  12   5 1756.05 190.521   2
   2  12   5 1728.34 367.427   4
   2  12   5 2149.44 351.263   5
  -2 -12  -6 156.673 63.5610   2
   2  12   6 110.208 45.0140   2
   2  12   7 104.746 87.6404   5
   2  12   7 44.6637 132.165   4
  -2 -12  -7 54.4738 40.0956   2
   2  12   7 28.6334 18.2575   2
  -2 -12  -8-4.81670 39.7835   2
  -2 -12  -8 26.9656 19.9995   1
  -2 -12  -9 839.986 163.062   2
  -2 -12  -9 677.908 74.0902   1
  -2 -12 -10 335.931 43.9791   1
  -2 -12 -10 344.486 96.1562   2
  -2 -12 -11 100.574 43.8822   2
  -2 -12 -12 370.703 114.525   2
  -2 -12 -13 172.829 82.2185   2
  -2 -12 -14 1.08503 20.8152   2
  -2 -12 -15 66.2044 47.6034   2
  -2 -12 -16-45.8635 51.6068   2
  -2 -13   8 0.86061 13.0459   3
   2  13  -8 7.01570 25.3429   6
  -2 -13   7 162.973 87.1271   3
   2  13  -7 158.664 84.0835   6
  -2 -13   6-33.5352 35.5389   3
   2  13  -6-47.9692 50.9647   6
  -2 -13   5 9.45022 30.4485   3
   2  13  -5 77.0124 68.6802   6
   2  13  -4-124.167 75.2025   6
  -2 -13   4 8.19026 24.2346   3
   2  13  -3 54.9836 59.9290   6
  -2 -13   3 66.9363 38.8059   3
   2  13  -2 222.058 120.652   5
   2  13  -2 221.379 102.653   6
   2  13  -1 34.5681 41.5935   6
   2  13  -1 100.128 91.6463   5
   2  13   0 3.21501 13.1532   2
   2  13   0 55.9834 84.0463   5
   2  13   1 28.0703 25.5837   2
   2  13   1-45.6970 81.3191   5
   2  13   2 39.7007 30.1275   2
   2  13   2-22.9253 88.3803   5
   2  13   2 9.32442 87.3332   4
   2  13   3 388.682 153.654   5
   2  13   3 423.201 95.1902   2
   2  13   3 62.0193 92.0766   4
   2  13   4 64.5799 38.3017   2
   2  13   4-51.6471 75.7903   5
   2  13   5 1042.15 259.324   5
   2  13   5 1085.90 156.607   2
   2  13   5 750.550 268.997   4
   2  13   6 10.3531 19.0043   2
   2  13   6-78.3302 124.663   5
   2  13   6 113.348 119.844   4
  -2 -13  -7 76.7396 33.6881   2
   2  13   7 45.0620 81.8448   4
   2  13   8 36.8967 80.4545   4
  -2 -13  -8 136.541 65.8940   2
  -2 -13  -9 34.4150 30.9186   2
  -2 -13  -9 18.6157 22.4195   1
  -2 -13 -10-14.7536 28.8299   2
  -2 -13 -11 129.808 60.9626   2
  -2 -13 -12-29.8458 30.3704   2
  -2 -13 -13 87.5618 35.3408   2
  -2 -13 -14-32.8451 42.4803   2
  -2 -13 -15-7.38402 28.4434   2
   2  14  -7 54.8720 53.3288   6
  -2 -14   6 35.4272 35.6647   3
   2  14  -6 141.317 81.1973   6
   2  14  -5-130.729 78.9444   6
  -2 -14   5 59.0266 45.5966   3
  -2 -14   4-53.8879 46.1588   3
   2  14  -4-73.5372 61.7732   6
  -2 -14   3 10.8749 20.4701   3
   2  14  -3 103.139 72.6469   6
   2  14  -2 173.959 147.746   5
   2  14  -2 175.620 86.8494   6
   2  14  -1-26.3224 53.2889   5
   2  14  -1-91.9065 69.2145   6
   2  14   0 32.8053 77.3156   5
   2  14   0-48.5236 53.2975   6
   2  14   1 15.4836 47.0105   5
   2  14   2 23.3483 54.7982   5
   2  14   2-47.3275 87.4956   4
   2  14   3 346.920 145.738   5
   2  14   3-3.19031 50.7374   4
   2  14   4 240.451 137.483   5
   2  14   4 100.558 100.995   4
   2  14   5 23.3263 50.5263   5
   2  14   5 123.939 114.668   4
   2  14   6-110.230 94.8103   5
   2  14   6-147.402 129.561   4
   2  14   7-90.7863 90.4477   5
   2  14   7-87.5280 111.206   4
   2  14   8 185.337 127.323   5
  -2 -14  -8 258.400 93.1481   2
   2  14   8 44.8079 87.8601   4
   2  14   9 171.474 120.038   5
  -2 -14  -9 68.7227 45.9365   2
   2  14   9 11.7604 57.8478   4
   2  14  10-218.904 172.483   4
  -2 -14 -10 85.1957 41.9856   2
  -2 -14 -11 483.260 131.392   2
  -2 -14 -12 66.6717 49.2917   2
  -2 -14 -13-10.7978 28.9135   2
  -2 -14 -14-22.9085 36.7164   2
  -2 -14 -15-38.0914 46.4649   2
   2  15  -5-242.429 110.022   6
  -2 -15   4 200.999 83.0618   3
   2  15  -4 30.7021 33.0736   6
   2  15  -3-18.0803 36.8941   6
  -2 -15   3-58.2784 48.0478   3
   2  15  -2 44.0741 51.6324   6
   2  15  -2 154.411 115.795   5
   2  15  -1 37.5991 62.3928   6
   2  15  -1 170.933 125.503   5
   2  15   0-2.42421 35.7414   5
   2  15   0 9.52720 29.7102   6
   2  15   1 113.085 94.7899   5
   2  15   2 134.772 103.181   5
   2  15   3 85.4455 85.3182   5
   2  15   3-11.4620 56.0943   4
   2  15   4 400.476 165.556   5
   2  15   4 221.047 150.785   4
   2  15   5 103.598 107.685   5
   2  15   5-7.94631 48.9276   4
   2  15   6 133.796 129.608   4
   2  15   6 151.096 128.387   5
   2  15   7 130.577 107.917   5
   2  15   7 17.8249 65.6803   4
   2  15   8 715.546 337.929   4
   2  15   8 339.617 171.493   5
  -2 -15  -9 130.528 67.9800   2
   2  15   9 138.245 147.205   5
   2  15   9-0.94136 205.184   4
   2  15  10 350.753 179.766   5
  -2 -15 -10 206.221 88.3463   2
   2  15  10 589.015 285.255   4
  -2 -15 -11 41.2793 45.3102   2
   2  15  11 34.9217 87.8089   5
   2  15  11 136.314 145.261   4
  -2 -15 -12 23.6711 37.6900   2
  -2 -15 -13 120.991 73.4532   2
  -2 -15 -14-69.9070 59.0572   2
   2  16  -3 9.47359 38.5597   6
   2  16  -2-69.2414 63.8653   6
  -2 -16   2 6.93646 17.9923   3
   2  16  -1 96.7743 88.0315   5
   2  16  -1 109.360 79.7558   6
   2  16   0 34.9494 75.8860   6
   2  16   0 5.23170 36.9104   5
   2  16   1 84.0685 72.3718   6
   2  16   1 9.41346 76.8048   5
   2  16   2-67.2870 74.9860   5
   2  16   3 16.3373 54.2957   5
   2  16   3-53.1876 96.3795   4
   2  16   4 10.8923 45.1573   5
   2  16   4 2.44030 133.621   4
   2  16   5 80.7620 86.5801   5
   2  16   5-26.7280 67.6863   4
   2  16   6-99.4459 95.8264   5
   2  16   6 43.6316 75.5973   4
   2  16   7 267.007 168.933   5
   2  16   7 183.738 155.145   4
   2  16   8 89.7891 110.603   4
   2  16   8 127.751 122.135   5
   2  16   9 290.294 189.407   5
   2  16   9 192.793 174.158   4
   2  16  10 216.658 173.066   5
  -2 -16 -10 108.863 67.1443   2
   2  16  10 40.7856 105.864   4
   2  16  11 39.7662 82.7433   5
  -2 -16 -11-22.0268 37.1848   2
   2  16  11 69.8463 114.323   4
   2  16  12 289.501 224.469   4
  -2 -16 -12 71.7735 27.8770   2
   2  16  13-318.759 237.013   4
  -2 -16 -13 76.1406 67.2458   2
   2  17   0-22.5786 51.6278   5
   2  17   1 0.55887 89.0465   5
   2  17   1-156.601 99.6795   6
   2  17   2-111.929 100.292   5
   2  17   3-122.064 102.242   5
   2  17   4-224.371 137.651   5
   2  17   4 25.7777 71.3662   4
   2  17   5 389.847 201.355   5
   2  17   5 37.3818 171.183   4
   2  17   6 45.2397 117.537   5
   2  17   6 173.459 150.281   4
   2  17   7 82.8267 94.5621   5
   2  17   7 154.993 139.666   4
   2  17   8-37.7324 84.8597   4
   2  17   8 108.715 107.001   5
   2  17   9-85.6236 102.093   5
   2  17   9 251.109 196.305   4
   2  17  10 78.5335 115.494   4
  -2 -17 -11 173.484 87.9607   2
   2  17  11-37.7431 81.6712   4
  -2 -17 -12-249.981 109.489   2
   2  17  12-77.7477 125.037   4
   2  18   5 389.223 278.694   4
   2  18   6 348.741 219.044   4
   2  18   7 0.94050 120.932   4
   2  18   8-94.7731 126.195   4
   2  18   9 2.20441 126.549   4
   3 -15  -7-4.24895 24.8444   1
   3 -14  -8 70.5330 50.0928   1
   3 -14  -7-44.0706 42.9597   1
  -3  14   7 335.654 252.180   4
  -3  14   6 6.06871 70.1060   4
  -3  14   5 213.212 198.477   4
  -3  14   4 111.978 141.573   4
  -3  14   3 326.353 224.843   4
  -3  14   2 17.4534 70.4450   4
  -3  14   1 106.779 138.851   4
  -3  14   0-218.464 202.873   4
   3 -13 -10-50.0432 41.2843   1
  -3  13   9-53.0319 118.755   4
   3 -13  -9 25.5189 23.7227   1
   3 -13  -8 54.6200 41.2896   1
  -3  13   8-51.2208 66.1164   5
  -3  13   7 159.698 97.5697   5
  -3  13   7-85.4487 135.876   4
   3 -13  -7 61.1356 59.1833   1
  -3  13   6-5.96394 56.4602   5
  -3  13   6 57.3277 123.000   4
  -3  13   5 274.622 128.265   5
  -3  13   5 112.465 146.588   4
  -3  13   4 33.1396 47.1581   5
  -3  13   4 51.5167 108.958   4
  -3  13   3 34.9690 47.7221   5
  -3  13   3-0.98721 126.115   4
  -3  13   2-90.8843 124.040   4
  -3  13   1-19.0276 83.4098   4
  -3  13   0 98.3904 149.116   4
  -3  13  -1-7.69670 57.8665   6
  -3  13  -1 352.243 239.582   4
  -3  13  -2-33.2954 53.5360   6
  -3  13  -3 150.622 113.180   6
   3 -12 -11 12.5210 27.6513   2
   3 -12 -11 62.6625 42.6749   1
   3 -12 -10 243.742 107.413   2
   3 -12 -10 180.159 72.5479   1
   3 -12  -9 52.5705 61.2781   2
   3 -12  -9-0.37369 35.1141   1
  -3  12   8-436.937 268.030   4
   3 -12  -8 17.3526 27.1518   1
   3 -12  -7-1.52639 19.5755   1
  -3  12   7 70.3405 68.2373   5
  -3  12   6 249.966 204.954   4
  -3  12   6 324.550 153.290   5
  -3  12   5-100.791 138.495   4
  -3  12   5 159.757 90.5483   5
  -3  12   4 89.0654 111.755   4
  -3  12   4-45.6221 51.7614   5
  -3  12   3 60.8961 52.6079   5
  -3  12   3 135.400 175.895   4
  -3  12   2 43.5397 47.5785   5
  -3  12   2-171.591 155.627   4
  -3  12   1-16.2213 34.5440   5
  -3  12   1-33.8415 85.1640   4
  -3  12   0 92.5938 57.7933   5
  -3  12   0 240.964 216.645   4
  -3  12  -1 120.041 171.400   4
  -3  12  -2 377.234 152.445   6
  -3  12  -3 119.013 55.1356   6
  -3  12  -4 233.800 124.230   6
  -3  12  -5 38.2659 49.4495   6
   3 -11 -12 22.1069 44.5608   2
   3 -11 -12-49.2698 37.2450   1
   3 -11 -11-8.28543 29.7806   1
   3 -11 -11-0.31011 41.8262   2
   3 -11 -10 58.4590 43.2819   1
   3 -11 -10 10.0101 28.1742   2
   3 -11  -9-122.981 73.1727   2
   3 -11  -9 26.3651 41.8555   1
   3 -11  -8 72.3402 40.1903   1
   3 -11  -8 140.536 68.8711   2
  -3  11   8 103.035 88.3536   4
   3 -11  -7-6.68850 32.3786   1
  -3  11   7-184.628 199.525   4
  -3  11   6 1663.33 498.534   4
  -3  11   5-45.8014 50.7896   5
  -3  11   5 122.185 197.873   4
  -3  11   4 80.9639 66.5968   5
  -3  11   4 125.914 137.804   4
  -3  11   3 288.907 178.344   4
  -3  11   3 102.807 75.2514   5
  -3  11   2 0.27244 27.4825   5
  -3  11   2 25.7593 124.166   4
  -3  11   1 169.852 80.0659   5
  -3  11   1 90.5795 113.989   4
  -3  11   0 655.554 160.203   5
  -3  11   0 345.748 203.166   4
  -3  11  -1 346.772 119.659   5
  -3  11  -1-24.3865 75.3493   4
  -3  11  -2-71.8751 68.6144   6
  -3  11  -2-303.840 205.639   4
  -3  11  -3 23.4925 51.5284   6
  -3  11  -4-22.4523 44.7675   6
  -3  11  -5 90.6935 84.8842   6
  -3  11  -6 31.9435 39.6275   6
  -3  11  -7 51.5275 50.8231   6
   3 -10 -13-129.023 80.3020   2
   3 -10 -12 37.2751 55.9220   2
   3 -10 -12 201.439 67.1987   1
   3 -10 -11 70.0421 46.4132   1
   3 -10 -11 32.7542 41.5267   2
   3 -10 -10 29.1684 35.4276   2
   3 -10 -10 24.2027 25.2057   1
   3 -10  -9 168.617 59.3577   1
   3 -10  -9 226.422 87.6348   2
   3 -10  -8 412.464 119.601   2
   3 -10  -8 451.776 108.295   1
  -3  10   7 149.233 153.578   4
   3 -10  -7 223.323 83.0147   1
   3 -10  -7 198.794 90.9990   2
  -3  10   6 955.017 351.393   4
  -3  10   5 105.214 68.6339   4
  -3  10   4 96.9318 54.0093   5
  -3  10   4 123.796 137.607   4
  -3  10   3 9.26187 49.3116   5
  -3  10   3 47.3656 71.4327   4
  -3  10   2 350.005 113.385   5
  -3  10   2 280.921 173.433   4
  -3  10   1-91.7100 59.8344   5
  -3  10   1-257.870 168.751   4
  -3  10   0 1145.99 197.949   5
  -3  10   0 828.802 286.872   4
  -3  10  -1-21.9993 49.3116   5
  -3  10  -1 126.987 159.303   4
   3 -10   2-0.75599 12.2070   3
  -3  10  -2-83.8974 92.2187   6
  -3  10  -2 35.3408 112.885   4
   3 -10   3 337.460 47.5368   3
  -3  10  -3 431.091 145.756   6
  -3  10  -4 316.953 132.226   6
  -3  10  -5 43.0511 44.2253   6
  -3  10  -6 10.6077 26.0179   6
  -3  10  -7 175.533 100.060   6
  -3  10  -8-47.2613 51.4104   6
  -3  10  -9-15.8671 36.0319   6
   3  -9 -13 45.1519 54.7702   2
   3  -9 -12 34.9894 32.3184   1
   3  -9 -12 11.7231 46.3206   2
   3  -9 -11 27.5039 48.3759   2
   3  -9 -11-10.4042 32.2414   1
   3  -9 -10-41.4676 42.7161   1
   3  -9 -10 46.2923 45.1680   2
   3  -9  -9 213.378 68.0607   1
   3  -9  -9 274.588 98.8348   2
   3  -9  -8-9.10796 38.0498   1
   3  -9  -8-19.7057 36.6568   2
   3  -9  -7 53.1807 23.2877   1
   3  -9  -7 97.3409 74.1542   2
   3  -9  -6 543.423 138.901   2
  -3   9   6 660.327 254.337   4
   3  -9  -6 364.259 86.5853   1
  -3   9   5 83.5303 110.075   4
  -3   9   4 191.457 90.5900   5
  -3   9   4 23.1522 85.5772   4
  -3   9   3 26.5111 146.205   4
  -3   9   3 9.22938 50.4325   5
  -3   9   2 39.8781 46.5619   5
  -3   9   2-33.9685 92.8819   4
  -3   9   1 449.238 123.989   5
  -3   9   1 314.694 152.341   4
  -3   9   0 323.311 98.5747   5
  -3   9   0 206.580 135.142   4
  -3   9  -1 450.779 121.195   5
  -3   9  -1 395.303 201.732   4
   3  -9   2 16.7658 14.5461   3
  -3   9  -2 252.443 178.067   4
   3  -9   3 656.619 63.7413   3
  -3   9  -3 690.511 179.155   6
   3  -9   4 1121.14 77.6043   3
  -3   9  -4 901.262 208.129   6
  -3   9  -5-41.5260 50.8494   6
   3  -9   5 46.9755 71.2221   5
  -3   9  -6 163.573 92.3757   6
   3  -9   6 132.786 110.771   5
  -3   9  -7-14.4132 29.8340   6
  -3   9  -8 24.0799 44.9883   6
  -3   9  -9 37.8387 68.9066   6
  -3   9 -10 81.6382 70.0844   6
   3  -8 -14 271.939 121.918   2
   3  -8 -13 268.421 111.535   2
   3  -8 -12 487.905 140.468   2
   3  -8 -11 755.445 132.062   1
   3  -8 -11 713.441 165.747   2
   3  -8 -10 360.030 117.698   2
   3  -8 -10 311.773 83.4332   1
   3  -8  -9 68.1817 19.9464   1
   3  -8  -9 147.109 75.6101   2
   3  -8  -8 50.2278 58.2362   2
   3  -8  -8-33.3030 35.3138   1
   3  -8  -7 4744.94 315.789   3
   3  -8  -7 4635.14 375.676   2
   3  -8  -7 4672.29 314.362   1
   3  -8  -6-50.1887 52.0844   1
   3  -8  -6 15.9172 26.2707   2
   3  -8  -5-22.7223 46.5714   2
  -3   8   5-12.6179 116.630   4
  -3   8   4-64.6449 94.4572   4
  -3   8   3 605.930 134.061   5
  -3   8   3 620.866 264.288   4
  -3   8   2 202.997 144.792   4
  -3   8   2 384.516 109.341   5
  -3   8   1 212.124 162.254   4
  -3   8   1 242.800 83.2629   5
  -3   8   0 108.710 41.5656   5
  -3   8   0 70.0368 96.7702   4
  -3   8  -1-32.3282 51.6100   5
  -3   8  -1 25.2258 69.3115   4
  -3   8  -2 46.2783 151.425   4
   3  -8   3 2542.58 113.078   3
  -3   8  -3 2375.20 324.408   6
   3  -8   4 1.92601 9.38769   3
  -3   8  -4 81.1483 79.0346   6
   3  -8   4 6.29611 40.0174   5
  -3   8  -5 1504.47 255.634   6
   3  -8   5 1702.68 263.358   5
   3  -8   6 454.327 143.755   5
  -3   8  -6 465.447 144.699   6
   3  -8   7-25.6949 36.5352   5
  -3   8  -7-45.7199 49.5244   6
  -3   8  -8 90.6060 56.5552   6
  -3   8  -9 8.92308 26.4616   6
  -3   8 -10 369.208 129.711   6
  -3   8 -11 170.349 85.6217   6
   3  -7 -15 304.174 122.277   2
   3  -7 -14 40.8971 59.1046   2
   3  -7 -13 162.462 83.1879   2
   3  -7 -12 234.104 95.5563   2
   3  -7 -11 202.222 74.4434   2
   3  -7 -11 216.161 66.9992   1
   3  -7 -10 491.076 125.453   2
   3  -7 -10 360.745 85.0918   1
   3  -7  -9 1706.07 184.322   1
   3  -7  -9 1685.88 227.057   2
   3  -7  -8 4.23803 28.7090   1
   3  -7  -8 15.9767 34.2702   2
   3  -7  -7 11049.0 474.447   3
   3  -7  -7 10522.0 454.147   1
   3  -7  -7 11072.2 559.407   2
   3  -7  -6 646.298 110.417   1
   3  -7  -6 844.814 122.916   3
   3  -7  -6 705.996 133.896   2
   3  -7  -5 749.536 134.538   2
   3  -7  -5 661.564 113.280   1
   3  -7  -4 715.097 132.094   2
  -3   7   4 751.609 263.110   4
  -3   7   4 771.510 134.206   2
  -3   7   3 275.883 78.5545   2
  -3   7   3 120.943 125.683   4
  -3   7   2 68.7221 46.6476   5
  -3   7   2 20.2033 22.5316   2
  -3   7   2 30.0440 79.2570   4
  -3   7   1 595.459 120.402   2
  -3   7   1 553.731 110.193   5
  -3   7   1 396.119 188.462   4
  -3   7   0 1693.95 360.917   4
  -3   7   0 2209.81 219.572   5
  -3   7   0 2395.84 247.609   2
  -3   7  -1 231.540 79.9510   2
  -3   7  -1 185.170 60.2945   5
  -3   7  -1 18.6411 59.5219   4
  -3   7  -2 190.958 140.905   4
   3  -7   3 4011.67 119.269   3
  -3   7  -3 3669.88 383.661   6
  -3   7  -3 3649.80 597.245   4
   3  -7   4 308.972 85.8802   5
   3  -7   4 351.081 35.2600   3
  -3   7  -4 332.147 120.336   6
   3  -7   5 91.2107 45.8006   5
  -3   7  -5 187.817 86.8278   6
   3  -7   6-2.16503 27.7247   5
  -3   7  -6-51.8695 60.4613   6
  -3   7  -7 7.57986 43.2250   6
   3  -7   7 44.5253 51.0473   5
  -3   7  -8 117.578 71.7496   6
   3  -7   8 153.953 106.748   5
  -3   7  -9 70.9883 57.3201   6
  -3   7 -10 166.079 82.0369   6
  -3   7 -11 132.475 80.6922   6
  -3   7 -12 103.154 73.6637   6
  -3   7 -13 350.447 118.543   2
   3  -6 -15 358.121 138.361   2
   3  -6 -14 104.134 65.8711   2
   3  -6 -13 186.323 91.1955   2
   3  -6 -12 308.504 108.892   2
   3  -6 -11-30.1433 46.3914   2
   3  -6 -10 121.719 87.6553   2
   3  -6 -10 133.656 42.7491   1
   3  -6  -9 1674.94 222.773   2
   3  -6  -9 1842.72 191.916   1
   3  -6  -8 1062.66 170.034   2
   3  -6  -8 1036.22 140.772   1
   3  -6  -7 207.629 63.6943   3
   3  -6  -7 212.992 72.9374   2
   3  -6  -7 255.592 69.8894   1
   3  -6  -6 522.558 94.7920   3
   3  -6  -6 753.817 140.634   2
   3  -6  -6 673.638 117.576   1
   3  -6  -5 125.151 47.3041   3
  -3   6   5 124.218 49.8961   2
   3  -6  -5 67.1057 38.4433   1
   3  -6  -5 38.8044 29.6585   2
   3  -6  -4-48.1741 41.9746   2
  -3   6   4 5.04671 14.1703   2
  -3   6   3 151.360 59.6584   2
  -3   6   2 618.247 115.858   2
  -3   6   1 8842.24 400.330   5
  -3   6   1 9259.70 456.283   2
  -3   6   0 1611.16 167.697   5
  -3   6   0 1600.14 192.457   2
  -3   6  -1 1501.01 191.748   2
  -3   6  -1 1320.27 150.058   5
   3  -6   1 1229.30 315.296   4
   3  -6   2 778.230 264.699   4
  -3   6  -2 713.179 226.291   4
   3  -6   2 811.249 50.8908   3
   3  -6   3 777.981 148.438   5
  -3   6  -3 888.893 192.520   6
   3  -6   4 3552.87 310.967   5
  -3   6  -4 3354.30 341.988   6
  -3   6  -5 4261.98 383.422   6
   3  -6   5 3848.22 342.480   5
  -3   6  -6 440.586 123.716   6
   3  -6   6 391.765 114.297   5
   3  -6   7-1.62115 25.1333   5
  -3   6  -7-77.8855 70.0707   6
   3  -6   8 16.9492 35.2759   5
  -3   6  -8 31.9956 43.4614   6
  -3   6  -9 616.550 151.628   6
   3  -6   9 500.462 158.917   5
  -3   6 -10 475.329 132.921   6
  -3   6 -11 95.3831 61.9126   6
  -3   6 -12 193.843 96.6867   6
  -3   6 -12 277.100 99.3305   2
  -3   6 -13 227.855 104.113   6
  -3   6 -13 57.8639 44.3717   2
  -3   6 -14 23.7309 28.5070   2
   3  -5 -15-93.1970 68.7820   2
   3  -5 -14 68.9186 66.0723   2
   3  -5 -13 307.378 112.384   2
   3  -5 -12 23.9374 35.5998   2
   3  -5 -11 654.939 147.634   2
   3  -5 -10-24.9758 35.3557   2
   3  -5  -9 49.8153 51.7336   2
   3  -5  -9-22.0957 33.2190   1
   3  -5  -8 6455.49 410.600   2
   3  -5  -8 6741.18 372.517   3
   3  -5  -8 6140.97 331.486   1
   3  -5  -7 5018.59 296.619   1
   3  -5  -7 4809.18 337.564   2
  -3   5   7 5213.76 335.109   2
   3  -5  -7 5369.50 313.996   3
   3  -5  -6 141.259 51.1340   3
   3  -5  -6 121.730 64.6639   2
  -3   5   6 219.522 64.0885   2
   3  -5  -6 146.357 51.3900   1
   3  -5  -5 552.386 87.2672   3
  -3   5   5 452.386 93.8921   2
   3  -5  -5 510.350 90.9945   1
  -3   5   4 21.1300 37.0873   2
   3  -5  -4-2.20825 16.0059   3
   3  -5  -4-46.8262 43.1782   1
  -3   5   3-6.58257 24.4914   2
   3  -5  -3 47.2693 20.8782   3
   3  -5  -2 80.9353 28.9182   3
  -3   5   2 53.3152 32.8759   2
  -3   5   1 1191.61 153.031   2
  -3   5   1 1247.78 133.742   5
  -3   5   0 3742.30 280.880   2
  -3   5   0 3328.22 206.824   5
  -3   5  -1 56.8705 36.0343   2
   3  -5   1-70.0918 79.5988   4
  -3   5  -1 57.0550 25.9278   5
   3  -5   2 2801.34 483.058   4
   3  -5   3 2369.62 216.223   5
   3  -5   3 2566.31 475.409   4
  -3   5  -4 141.474 78.8865   6
   3  -5   4 179.430 169.585   4
   3  -5   4 193.610 66.4742   5
  -3   5  -5 491.087 122.679   6
   3  -5   5 470.344 111.119   5
   3  -5   5 534.406 239.120   4
  -3   5  -6 2766.39 286.083   6
   3  -5   6 2618.41 282.120   5
   3  -5   7 157.106 68.7370   5
  -3   5  -7 218.227 88.6339   6
  -3   5  -8 191.933 79.6685   6
   3  -5   8-1.60255 21.4898   5
  -3   5  -9 710.626 154.597   6
   3  -5   9 636.024 167.519   5
  -3   5 -10 45.9514 43.7079   6
  -3   5 -11 866.327 175.896   6
  -3   5 -12 189.381 84.2167   6
  -3   5 -12 156.045 74.3033   2
  -3   5 -13 6.88464 57.1777   6
  -3   5 -13-17.7115 45.7678   2
  -3   5 -14 118.313 72.1945   6
  -3   5 -14 28.6642 36.9465   2
   3  -4 -16 518.071 162.731   2
   3  -4 -15 99.0250 86.1626   2
   3  -4 -14 104.801 67.8750   2
   3  -4 -13 30.8885 33.7540   2
   3  -4 -12 69.5690 42.9657   2
   3  -4 -11-15.6801 41.6260   2
   3  -4 -10 374.733 104.471   2
   3  -4  -9 762.895 142.951   2
   3  -4  -9 664.174 106.797   1
   3  -4  -8 6715.90 364.823   3
   3  -4  -8 6302.60 325.916   1
   3  -4  -8 6209.04 387.169   2
   3  -4  -7 9550.43 395.646   1
  -3   4   7 10230.2 451.924   2
   3  -4  -7 9843.53 419.798   3
   3  -4  -7 9419.76 458.499   2
   3  -4  -6 4973.86 322.427   2
   3  -4  -6 5062.98 279.694   3
  -3   4   6 5797.60 326.554   2
   3  -4  -6 4992.87 283.104   1
   3  -4  -5 4170.97 253.748   1
  -3   4   5 4215.68 276.866   2
   3  -4  -5 4507.58 242.209   3
   3  -4  -4 573.955 80.1590   3
   3  -4  -4 429.821 80.7524   1
  -3   4   4 632.664 105.188   2
   3  -4  -3 2218.97 143.137   3
  -3   4   3 2160.24 191.954   2
  -3   4   2 2652.80 209.061   2
   3  -4  -2 2763.26 143.980   3
  -3   4   1 19834.2 589.663   2
   3  -4  -1 19404.2 331.307   3
  -3   4   0 169.741 57.1894   2
  -3   4   0 151.307 35.8914   5
   3  -4   0 179.113 26.6275   3
  -3   4  -1 1572.82 108.546   5
   3  -4   1 1482.62 304.947   4
   3  -4   2 4419.07 567.671   4
   3  -4   3-29.5926 31.4372   5
   3  -4   3-59.3295 104.775   4
   3  -4   4 271.679 68.1257   5
   3  -4   4 276.677 139.206   4
   3  -4   5 58.7835 38.0798   5
   3  -4   5 26.9759 59.9644   4
  -3   4  -6-14.7946 37.0603   6
   3  -4   6-22.5129 61.8523   4
   3  -4   6-1.56913 18.3590   5
  -3   4  -7 230.081 79.6624   6
   3  -4   7 171.457 74.9857   5
  -3   4  -8 78.2868 48.0303   6
   3  -4   8 44.9502 43.3507   5
  -3   4  -9 91.0141 53.6221   6
   3  -4   9 127.167 76.7139   5
  -3   4 -10 37.9691 22.6393   6
   3  -4  10 174.393 88.8288   5
  -3   4 -11 197.538 81.3140   6
  -3   4 -12 266.015 99.1121   6
  -3   4 -12 318.490 97.7719   2
  -3   4 -13 61.4456 42.3846   6
  -3   4 -13 35.3973 26.5893   2
  -3   4 -14-41.3411 44.2725   6
  -3   4 -14 51.5485 38.2976   2
  -3   4 -15-9.99468 25.8853   2
   3  -3 -16 66.9414 70.0921   2
   3  -3 -15 123.397 87.8412   2
   3  -3 -14 387.516 125.993   2
   3  -3 -13 84.0427 58.2552   2
   3  -3 -12 554.781 136.597   2
   3  -3 -11-3.54329 28.0412   2
   3  -3 -10 29.0310 43.5860   2
   3  -3  -9 2798.60 264.938   2
  -3   3   9 2840.44 260.698   1
  -3   3   8 425.494 95.9990   1
  -3   3   8 531.482 104.021   2
   3  -3  -8 490.285 106.609   2
   3  -3  -8 498.899 101.475   3
   3  -3  -8 440.456 80.9310   1
   3  -3  -7 5509.54 311.513   3
   3  -3  -7 5119.40 281.700   1
  -3   3   7 5155.65 307.862   2
  -3   3   7 5033.21 312.294   1
   3  -3  -7 5443.11 331.936   2
   3  -3  -6 4934.38 271.390   1
   3  -3  -6 5084.11 277.556   3
  -3   3   6 5150.88 298.692   2
   3  -3  -6 4739.47 300.863   2
   3  -3  -5 1734.13 151.270   3
   3  -3  -5 1687.51 154.931   1
  -3   3   5 1864.44 172.613   2
   3  -3  -4 11716.6 358.484   3
   3  -3  -4 11097.4 395.589   1
  -3   3   4 12164.5 438.976   2
   3  -3  -3 1410.07 112.814   3
  -3   3   3 1288.79 139.593   2
   3  -3  -3 1295.99 129.952   1
  -3   3   2 2022.11 172.799   2
   3  -3  -2 2056.53 124.399   3
   3  -3  -1 6560.82 192.867   3
  -3   3   1 6280.78 307.543   2
   3  -3   0 4538.09 138.014   3
  -3   3   0 5405.06 176.517   5
  -3   3   0 5145.51 289.807   2
   3  -3   1 1779.33 315.097   4
   3  -3   2 2004.35 353.910   4
   3  -3   3 463.485 76.6847   5
   3  -3   3 723.540 229.398   4
   3  -3   4 1162.54 127.029   5
   3  -3   4 1045.45 268.229   4
   3  -3   5 9248.82 409.530   5
   3  -3   5 8927.17 786.508   4
   3  -3   6 2390.98 443.639   4
   3  -3   7 2069.07 273.247   6
  -3   3  -7 2098.91 224.537   6
   3  -3   7 2507.08 484.394   4
  -3   3  -7 1981.48 141.653   3
  -3   3  -8 4435.35 237.680   3
  -3   3  -8 4568.91 336.953   6
  -3   3  -9 3070.78 217.448   3
  -3   3  -9 3288.56 293.934   6
  -3   3 -10 3169.14 242.288   3
  -3   3 -10 3498.82 312.273   6
  -3   3 -11 2172.56 215.613   3
  -3   3 -11 2093.04 250.841   6
  -3   3 -11 2112.59 232.353   2
  -3   3 -12 829.999 142.336   3
  -3   3 -12 854.680 152.527   2
  -3   3 -12 944.127 176.454   6
  -3   3 -13 464.968 126.496   6
  -3   3 -13 453.425 118.635   2
  -3   3 -14 65.2982 39.6401   2
  -3   3 -14 43.6856 27.0614   6
  -3   3 -15 69.0331 49.9029   6
  -3   3 -15 79.3668 40.8104   2
   3  -2 -16-16.9854 32.9073   2
   3  -2 -15 1.10454 52.3920   2
   3  -2 -14 1.27794 34.8269   2
   3  -2 -13-12.4929 30.2985   2
   3  -2 -12 172.254 77.7328   2
   3  -2 -11 55.9481 41.2214   2
   3  -2 -10 63.3568 42.4865   2
  -3   2   9 4427.53 317.359   6
  -3   2   9 4386.23 291.832   2
   3  -2  -9 3899.78 306.000   2
  -3   2   9 4582.87 331.759   1
   3  -2  -8 318.561 85.6008   3
  -3   2   8 516.223 101.998   6
   3  -2  -8 266.922 74.3847   2
  -3   2   8 401.013 97.3334   1
  -3   2   8 361.705 82.5269   2
   3  -2  -7 3539.70 250.987   3
   3  -2  -7 3152.99 212.537   1
  -3   2   7 3594.49 244.210   2
  -3   2   7 3618.59 272.812   1
   3  -2  -7 3138.67 247.939   2
   3  -2  -6 924.365 120.269   3
  -3   2   6 944.394 122.417   2
  -3   2   6 830.261 121.112   1
   3  -2  -6 786.313 119.161   2
   3  -2  -6 736.572 101.817   1
   3  -2  -5 11869.4 398.703   3
   3  -2  -5 11440.2 394.497   1
  -3   2   5 11705.5 412.591   2
   3  -2  -4 4806.05 235.794   3
   3  -2  -4 4855.08 253.226   1
  -3   2   4 5115.34 268.558   2
   3  -2  -3 2177.65 143.899   3
   3  -2  -3 2102.19 164.205   1
   3  -2  -3 2082.48 173.381   2
  -3   2   3 2130.91 169.453   2
   3  -2  -2 662.206 72.2658   3
   3  -2  -2 615.875 92.3835   2
   3  -2  -2 686.830 92.6354   1
  -3   2   2 560.838 86.2551   2
   3  -2  -1 418.948 51.8052   3
  -3   2   1 414.746 73.2550   2
   3  -2   0 8163.51 204.895   3
  -3   2   0 8297.40 339.057   2
  -3   2   0 8704.72 627.263   4
   3  -2   1 576.536 158.511   4
  -3   2  -1 584.331 159.391   4
  -3   2  -2 5964.09 329.448   6
   3  -2   2 6378.93 579.994   4
  -3   2  -2 5710.73 500.155   4
   3  -2   3 647.434 69.0286   5
  -3   2  -3 599.992 107.487   6
   3  -2   3 615.866 213.808   4
  -3   2  -4 30.9223 9.50258   3
   3  -2   4 44.6743 49.5872   4
  -3   2  -5 2495.73 107.724   3
   3  -2   5 2564.64 262.058   6
   3  -2   5 2720.42 422.700   4
  -3   2  -6 4559.29 176.604   3
   3  -2   6 4552.07 363.286   6
   3  -2   6 5154.03 631.232   4
   3  -2   7 0.86978 29.9127   6
  -3   2  -7 7.18692 8.35094   3
   3  -2   8 10.6579 20.5324   6
  -3   2  -8 65.8310 42.3444   6
  -3   2  -8 78.6042 30.2436   3
  -3   2  -9 1019.25 118.165   3
  -3   2  -9 1142.01 165.472   6
  -3   2 -10 3572.60 240.617   3
  -3   2 -10 3721.82 309.498   6
  -3   2 -11 2455.75 260.843   6
  -3   2 -11 2451.44 217.070   3
  -3   2 -11 2489.67 243.168   2
  -3   2 -12 59.9662 37.9819   3
  -3   2 -12 150.440 65.1923   6
  -3   2 -12 33.8294 32.3113   2
  -3   2 -13 13.0787 25.5590   6
  -3   2 -13 32.8835 33.3454   2
  -3   2 -14 109.578 62.7022   6
  -3   2 -14 30.9242 37.1918   2
  -3   2 -15 169.164 86.1772   6
  -3   2 -15 41.5201 39.8129   2
  -3   2 -16 469.907 141.138   6
  -3   2 -16 411.769 128.271   2
   3  -1 -16 82.2055 61.7475   2
   3  -1 -15 46.9732 62.7231   2
   3  -1 -14-66.3221 51.1459   2
   3  -1 -13 17.4451 42.6088   2
   3  -1 -12 13.1242 18.6193   2
   3  -1 -11 824.507 153.818   2
   3  -1 -10 1331.30 178.616   2
  -3   1   9 1263.25 152.202   2
  -3   1   9 1424.27 176.038   6
   3  -1  -9 1315.62 169.139   2
  -3   1   9 1229.25 173.338   1
   3  -1  -8 2304.95 221.904   3
  -3   1   8 2519.97 205.192   2
  -3   1   8 2081.82 216.603   1
  -3   1   8 2507.27 216.790   6
   3  -1  -8 2162.36 210.298   2
   3  -1  -7 1128.86 145.587   3
  -3   1   7 1234.20 144.505   6
  -3   1   7 1141.11 131.244   2
   3  -1  -7 968.410 136.244   2
  -3   1   7 1143.77 151.793   1
   3  -1  -6 266.787 66.4775   3
  -3   1   6 152.741 51.9661   1
   3  -1  -6 214.416 51.7854   1
  -3   1   6 233.054 57.5950   2
   3  -1  -5 5929.05 290.263   3
  -3   1   5 6173.93 284.329   2
   3  -1  -5 5904.91 274.979   1
   3  -1  -4 418.766 75.1075   1
   3  -1  -4 370.346 69.5927   2
  -3   1   4 357.221 64.9083   3
  -3   1   4 372.295 65.9969   2
   3  -1  -4 376.465 66.9227   3
   3  -1  -3 1963.56 144.645   3
   3  -1  -3 1833.34 152.538   2
   3  -1  -3 1879.89 148.759   1
  -3   1   3 1940.27 134.367   3
  -3   1   3 1870.95 147.007   2
   3  -1  -2 8442.78 279.277   3
   3  -1  -2 8493.05 309.453   2
   3  -1  -2 8681.98 314.408   1
  -3   1   2 8736.74 257.078   3
  -3   1   2 8302.51 297.754   2
   3  -1  -1 1083.99 93.1176   3
  -3   1   1 917.503 77.0194   3
  -3   1   1 1066.79 105.328   2
   3  -1  -1 1010.50 101.502   1
  -3   1   0 6236.94 168.738   3
  -3   1   0 6085.87 181.423   5
  -3   1   0 6546.22 268.732   2
  -3   1   0 6645.80 488.559   4
  -3   1  -1 1669.21 75.9287   3
   3  -1   1 1984.61 261.025   4
  -3   1  -1 1605.97 236.983   4
   3  -1   2 5665.76 492.466   4
  -3   1  -2 5243.88 273.264   6
  -3   1  -2 4639.62 415.786   4
  -3   1  -3 19.4550 20.0072   6
   3  -1   3-58.3875 71.3829   4
   3  -1   4 11.7928 29.0257   6
  -3   1  -4-3.93744 33.8118   6
   3  -1   4 80.7778 94.5400   4
  -3   1  -5 48.3920 39.0051   6
   3  -1   5 19.0787 18.9127   6
   3  -1   5 5.49389 61.7881   4
  -3   1  -6 2268.70 122.211   3
   3  -1   6 2460.12 244.719   6
  -3   1  -7 357.699 54.1147   3
   3  -1   7 253.370 79.5243   6
   3  -1   8 3367.97 310.952   6
  -3   1  -8 3249.26 254.668   6
  -3   1  -8 3292.95 183.137   3
  -3   1  -9 769.830 98.5923   3
   3  -1   9 778.102 158.050   6
  -3   1  -9 646.422 117.064   6
  -3   1 -10-18.8991 45.9394   6
  -3   1 -10-76.5926 55.1727   2
  -3   1 -10 13.0262 16.2383   3
  -3   1 -11 22.5926 22.5259   2
  -3   1 -11 59.7541 32.2134   3
  -3   1 -11 25.4070 32.9388   6
  -3   1 -12 540.349 124.369   6
  -3   1 -12 431.731 90.4626   3
  -3   1 -12 419.966 110.026   2
  -3   1 -13 33.9979 26.0370   6
  -3   1 -13 27.6848 28.5085   2
  -3   1 -14-11.7189 36.8522   6
  -3   1 -14-42.6337 56.2287   2
  -3   1 -15 67.1734 57.2155   6
  -3   1 -15 255.822 92.3223   2
  -3   1 -16 38.7280 33.5298   6
  -3   1 -16 44.9282 38.1843   2
   3   0 -16-12.3434 29.1467   2
   3   0 -15-32.5667 38.1568   2
   3   0 -14-45.2034 41.9413   2
   3   0 -13-41.5728 38.8250   2
   3   0 -12 52.0127 38.8589   2
   3   0 -11 63.9805 43.6017   2
   3   0 -10 2124.60 228.587   2
  -3   0  10 2483.49 251.914   6
  -3   0   9 621.966 104.208   2
  -3   0   9 760.922 129.202   6
   3   0  -9 609.192 111.548   2
   3   0  -8 4876.02 332.774   3
  -3   0   8 4779.78 321.169   1
   3   0  -8 4764.49 299.521   2
  -3   0   8 5147.31 283.809   2
  -3   0   8 4986.03 303.722   6
   3   0  -7 1680.57 183.475   3
  -3   0   7 1684.75 171.351   3
  -3   0   7 1697.12 165.162   6
  -3   0   7 1606.02 178.686   1
  -3   0   7 1718.96 154.912   2
   3   0  -6 73.9575 40.1549   3
  -3   0   6 98.1021 39.9964   6
  -3   0   6 125.642 50.3072   1
  -3   0   6 63.0090 33.1597   2
   3   0  -5 3467.62 231.584   3
  -3   0   5 3562.21 201.266   6
  -3   0   5 3377.92 196.441   2
   3   0  -5 3325.21 207.032   2
   3   0  -4 766.999 104.049   3
   3   0  -4 715.289 90.9903   1
  -3   0   4 712.803 86.4559   2
   3   0  -4 731.663 89.5224   2
   3   0  -3 541.384 78.0654   2
   3   0  -3 454.620 75.7816   3
  -3   0   3 530.661 74.4287   3
  -3   0   3 558.596 75.1589   2
   3   0  -3 566.319 82.5402   1
   3   0  -2 25681.6 527.744   3
  -3   0   2 25419.6 466.332   3
  -3   0   2 24621.7 474.753   2
   3   0  -2 24157.5 501.551   1
   3   0  -2 24924.4 503.410   2
   3   0  -1-3.68092 19.6088   1
  -3   0   1 2.50767 9.89822   2
   3   0  -1 1.76227 13.3281   2
  -3   0   1 4.51164 12.7506   3
  -3   0   1 16.6427 17.8300   5
  -3   0   0 9280.40 247.447   3
  -3   0   0 9453.66 299.472   5
  -3   0   0 10152.3 529.834   4
   3   0   0 9550.88 294.709   1
  -3   0   0 9811.67 290.392   2
   3   0   1 11177.6 255.169   5
   3   0   1 11357.9 540.744   4
  -3   0  -1 10935.9 542.124   4
   3   0   2 10592.6 262.987   5
  -3   0  -2 10698.5 323.724   6
   3   0   2 11270.6 600.459   4
  -3   0  -2 11323.8 588.441   4
   3   0   3 581.930 92.2688   6
  -3   0  -3 627.848 81.7069   6
   3   0   3 478.058 116.790   4
  -3   0  -4 8289.80 310.427   6
   3   0   4 7549.56 339.592   6
   3   0   4 8830.11 651.352   4
  -3   0  -5 25.0746 24.6429   6
   3   0   5-2.79175 23.0795   6
   3   0   6 1130.24 148.523   6
   3   0   7 89.7273 44.8159   6
   3   0   8 38.2077 36.9740   6
  -3   0  -8-3.42250 12.2061   3
  -3   0  -9 1536.99 176.754   6
  -3   0  -9 1421.59 161.318   2
  -3   0  -9 1507.09 137.783   3
   3   0   9 1647.40 213.017   6
  -3   0 -10 3665.48 284.759   6
  -3   0 -10 3312.90 218.825   3
  -3   0 -10 3502.36 256.225   2
  -3   0 -11 2.39012 12.4040   3
  -3   0 -11-2.33580 25.1565   6
  -3   0 -11-24.0826 43.9117   2
  -3   0 -12 162.134 67.4367   6
  -3   0 -12 77.1221 38.5195   3
  -3   0 -12 147.854 60.9712   2
  -3   0 -13-8.59684 40.4963   6
  -3   0 -13-16.1421 34.0380   2
  -3   0 -14 10.3562 26.5690   6
  -3   0 -14-9.40202 40.4987   2
  -3   0 -15 93.8676 69.9639   6
  -3   0 -15 99.7137 56.1431   2
  -3   0 -16 25.7226 56.7143   2
  -3   0 -17 66.5275 68.2346   2
   3   1 -16-63.3361 51.9722   2
   3   1 -15 48.8065 44.0805   2
   3   1 -14 4.87382 22.6480   2
   3   1 -13-28.4387 32.9961   2
   3   1 -12 13.0166 37.9069   2
   3   1 -11 511.579 109.201   2
   3   1 -10 44.2374 38.9487   2
  -3  -1   9 1747.12 199.050   6
  -3  -1   9 1475.54 159.864   2
   3   1  -9 1361.11 163.306   2
  -3  -1   8 3543.94 272.600   1
  -3  -1   8 3615.23 269.080   6
  -3  -1   8 3822.28 239.847   2
   3   1  -8 3580.39 248.185   2
  -3  -1   8 3717.21 266.879   3
   3   1  -7 879.588 139.257   3
  -3  -1   7 922.000 108.967   2
  -3  -1   7 954.024 122.875   6
  -3  -1   7 1030.65 140.893   1
   3   1  -6 321.316 78.0647   3
  -3  -1   6 302.436 58.6256   2
  -3  -1   6 279.320 61.1463   6
   3   1  -5 1005.97 134.435   3
  -3  -1   5 953.295 97.2313   2
  -3  -1   5 873.373 97.6940   6
   3   1  -5 889.033 104.887   2
  -3  -1   4 436.727 61.0225   6
   3   1  -4 362.761 59.9921   2
  -3  -1   4 419.114 59.7841   2
   3   1  -4 410.954 80.9389   3
   3   1  -3 1297.75 113.316   1
  -3  -1   3 1182.73 96.1375   2
  -3  -1   3 1285.43 92.1006   6
   3   1  -3 1223.56 103.055   2
   3   1  -3 1157.62 127.576   3
  -3  -1   2 4770.25 217.850   3
   3   1  -2 4405.07 189.962   2
  -3  -1   2 4315.96 272.708   5
  -3  -1   2 4537.52 180.170   2
   3   1  -2 4590.24 207.797   1
  -3  -1   1 7944.23 276.540   3
  -3  -1   1 7918.64 275.613   1
   3   1  -1 7806.85 263.838   1
  -3  -1   1 7907.37 346.371   5
   3   1  -1 7839.06 229.639   2
  -3  -1   1 7557.10 222.465   2
  -3  -1   0 1170.40 86.0179   2
   3   1   0 1262.98 117.705   5
   3   1   0 1403.73 108.214   1
  -3  -1   0 1260.48 125.972   5
  -3  -1  -1 79219.2 627.680   6
   3   1   1 80568.8 932.128   5
   3   1   1 74776.5 755.047   1
  -3  -1  -1 75186.6 1177.69   4
  -3  -1  -1 75935.9 916.747   5
   3   1   2 12295.1 320.633   6
  -3  -1  -2 12779.8 274.312   6
   3   1   2 12566.9 536.767   4
   3   1   2 12574.7 367.973   5
   3   1   3 5861.25 234.057   6
   3   1   3 6782.81 459.120   4
  -3  -1  -3 6088.39 210.975   6
   3   1   4 3347.99 195.203   6
  -3  -1  -4 3450.78 176.079   6
   3   1   5 11567.3 392.740   6
  -3  -1  -5 12292.3 361.220   6
   3   1   6-14.5949 21.2866   6
  -3  -1  -6 32.5322 28.0442   6
   3   1   7 1471.28 166.072   6
   3   1   8 4381.53 302.713   6
  -3  -1  -8 3942.53 254.809   6
  -3  -1  -9 1999.85 192.707   6
   3   1   9 2313.81 238.865   6
  -3  -1 -10 1724.25 189.212   6
  -3  -1 -10 1762.62 162.119   3
  -3  -1 -10 1753.63 180.361   2
   3   1  10 1745.61 218.102   6
  -3  -1 -11 3773.65 276.822   2
  -3  -1 -11 3458.32 242.928   3
  -3  -1 -11 4108.10 310.974   6
  -3  -1 -12 36.6101 28.4604   3
  -3  -1 -12 142.477 70.2621   6
  -3  -1 -12 48.7787 38.4517   2
  -3  -1 -13 2100.90 223.478   2
  -3  -1 -13 2061.50 247.794   6
  -3  -1 -14 1012.89 164.287   2
  -3  -1 -15 373.682 101.182   2
  -3  -1 -16 78.6804 51.4500   2
  -3  -1 -17 337.387 106.167   2
   3   2 -16 0.25671 34.8659   2
   3   2 -15 33.2297 36.9178   2
   3   2 -14-64.6143 47.6298   2
   3   2 -13 23.9670 29.7999   2
   3   2 -12 41.5420 42.3607   2
   3   2 -11 616.331 123.134   2
   3   2 -10 1328.99 170.684   2
  -3  -2   9 3304.30 290.053   6
  -3  -2   9 3710.00 286.714   3
   3   2  -9 3443.50 257.865   2
  -3  -2   8 28.6783 31.6919   6
  -3  -2   8 26.7168 16.9424   2
  -3  -2   8 20.8307 25.0070   3
   3   2  -8 43.4228 32.3821   2
   3   2  -7 349.804 92.3361   3
  -3  -2   7 453.009 76.8407   2
  -3  -2   7 349.146 80.5920   6
  -3  -2   7 364.145 80.4146   3
  -3  -2   7 389.209 84.8873   1
   3   2  -6 413.592 74.5979   2
  -3  -2   6 390.165 64.3952   2
   3   2  -6 495.192 104.389   3
  -3  -2   6 418.782 78.2732   6
   3   2  -5 529.111 97.3667   3
  -3  -2   5 394.876 110.654   5
   3   2  -5 463.711 71.6695   2
  -3  -2   5 499.160 66.6456   2
  -3  -2   5 511.246 82.2330   6
  -3  -2   4 950.032 157.220   5
  -3  -2   4 1079.13 89.5738   2
   3   2  -4 992.371 96.3938   2
  -3  -2   4 1045.57 100.132   6
  -3  -2   3 6152.41 383.903   5
  -3  -2   3 6624.77 200.498   2
   3   2  -3 6627.68 223.663   2
  -3  -2   3 6686.93 219.219   6
  -3  -2   2 3018.65 251.775   5
  -3  -2   2 3124.70 126.586   2
  -3  -2   2 2896.50 119.113   6
   3   2  -2 3205.38 143.280   2
   3   2  -1 14111.0 340.580   1
  -3  -2   1 14394.6 191.780   6
   3   2  -1 14461.8 269.371   2
  -3  -2   1 14809.6 538.647   5
   3   2  -1 15369.4 515.573   5
  -3  -2   1 14060.4 257.373   2
  -3  -2   1 14256.8 371.754   1
  -3  -2   0 4416.32 197.184   1
  -3  -2   0 4889.63 287.567   5
  -3  -2   0 4960.99 146.142   2
   3   2   0 5318.48 288.167   5
   3   2   0 5271.02 198.959   1
  -3  -2  -1 174931. 1650.13   5
   3   2   1 180481. 1650.99   5
   3   2   1 182821. 1104.60   1
  -3  -2  -1 170789. 1302.75   4
  -3  -2  -1 178159. 1080.83   1
   3   2   2 1069.08 68.8656   6
  -3  -2  -2 1097.91 60.3137   6
   3   2   2 1029.52 118.444   5
   3   2   2 1132.28 84.0659   1
   3   2   2 1090.18 123.797   4
   3   2   3 117.751 27.3056   6
  -3  -2  -3 160.418 29.8342   6
   3   2   4 394.966 58.4493   6
  -3  -2  -4 410.626 53.6204   6
  -3  -2  -5 674.358 77.8554   6
   3   2   5 600.015 80.1697   6
   3   2   6 339.916 67.4569   6
  -3  -2  -6 365.753 66.2721   6
  -3  -2  -7 2430.09 182.397   6
   3   2   7 2454.52 197.798   6
  -3  -2  -8 3844.97 243.196   6
   3   2   8 3976.86 273.013   6
   3   2   9 1175.57 158.873   6
  -3  -2  -9 1279.95 152.305   6
  -3  -2 -10 980.100 128.391   2
   3   2  10 904.862 148.729   6
  -3  -2 -10 973.799 139.423   6
  -3  -2 -11 775.147 123.842   2
  -3  -2 -11 800.143 136.084   6
  -3  -2 -12 470.755 98.1474   3
  -3  -2 -12 613.038 115.583   2
  -3  -2 -13 455.333 103.122   2
  -3  -2 -14 739.048 137.188   2
  -3  -2 -15 374.455 104.183   2
  -3  -2 -16 215.901 81.6324   2
  -3  -2 -17 107.825 63.3387   2
   3   3 -16 28.9328 60.8480   2
   3   3 -15 19.4853 42.2280   2
   3   3 -14-0.20944 57.5032   2
   3   3 -13 96.1680 55.3412   2
   3   3 -12 130.529 60.7004   2
   3   3 -11 207.888 74.5673   2
   3   3 -10 1051.19 149.115   2
  -3  -3  10 1203.28 176.467   3
   3   3  -9 9.20117 19.4574   2
  -3  -3   9-27.3264 49.7816   6
  -3  -3   9 91.2427 53.4326   3
  -3  -3   8 127.054 51.8536   3
   3   3  -8 113.208 46.9047   2
  -3  -3   8 148.130 60.6085   6
  -3  -3   7-6.42456 18.4374   3
  -3  -3   7 49.6888 38.3498   6
  -3  -3   7 33.3938 25.2715   5
  -3  -3   7 11.6806 24.7242   1
  -3  -3   6 149.614 55.1083   3
   3   3  -6 142.271 41.3104   2
  -3  -3   6 156.641 80.5004   5
  -3  -3   6 175.043 60.9546   6
  -3  -3   5 848.325 113.235   6
  -3  -3   5 772.535 84.1886   2
   3   3  -5 753.985 87.2471   2
   3   3  -5 817.332 94.7980   6
  -3  -3   5 955.841 184.571   5
   3   3  -4 13.6490 11.5339   2
   3   3  -4 20.4026 15.1936   6
  -3  -3   4 34.4268 24.1686   6
  -3  -3   4 15.8114 12.1395   2
  -3  -3   4-4.60000 29.2349   5
  -3  -3   3 2976.14 126.284   2
  -3  -3   3 3033.12 294.418   5
   3   3  -3 3115.75 145.342   6
  -3  -3   3 3130.57 176.220   6
   3   3  -3 2912.27 137.816   2
   3   3  -2 503.376 49.2432   6
  -3  -3   2 467.277 61.1853   6
  -3  -3   2 476.377 41.4191   2
  -3  -3   2 515.396 117.965   5
   3   3  -2 498.214 48.4007   2
  -3  -3   1 1037.78 162.415   5
   3   3  -1 1043.79 58.8668   2
   3   3  -1 1085.51 151.285   5
  -3  -3   1 1049.02 50.4439   2
  -3  -3   1 1222.79 109.118   1
   3   3  -1 1167.78 58.0717   6
  -3  -3   0 649.956 37.3445   2
  -3  -3   0 587.923 114.676   5
   3   3   0 696.422 123.778   5
  -3  -3   0 560.940 74.6279   1
  -3  -3  -1 5689.57 205.312   1
   3   3   1 6631.89 199.660   1
  -3  -3  -1 6571.95 362.878   5
   3   3   1 6342.46 351.466   5
   3   3   2 2563.48 89.2938   6
   3   3   2 2549.24 222.913   5
   3   3   2 2455.65 112.626   1
  -3  -3  -2 2480.75 118.791   1
   3   3   3 2656.54 113.028   1
   3   3   3 2569.27 114.686   6
   3   3   4 3850.15 167.615   6
  -3  -3  -4 4065.93 164.742   2
   3   3   5 6191.45 243.440   6
  -3  -3  -5 6658.92 233.938   2
  -3  -3  -6 1134.45 106.144   2
   3   3   6 1115.45 114.507   6
   3   3   7-0.67285 21.5927   6
  -3  -3  -7 24.6469 22.2249   2
   3   3   8 207.206 56.0436   6
   3   3   9 4360.64 290.284   6
   3   3  10 144.576 52.3654   6
  -3  -3 -10 171.478 54.9343   2
  -3  -3 -11 521.383 102.002   2
  -3  -3 -12 4574.12 313.789   2
  -3  -3 -13 107.974 49.2057   2
  -3  -3 -14 134.850 64.4285   2
  -3  -3 -15-2.76029 18.2842   2
  -3  -3 -16-13.3202 38.1152   2
  -3  -3 -17 89.3615 40.7562   2
   3   4 -15-80.2927 53.6674   2
   3   4 -14 53.5771 46.4329   2
   3   4 -13 16.8918 24.2516   2
   3   4 -12 70.3826 50.5084   2
   3   4 -11 70.8836 54.2280   2
  -3  -4  11 70.7448 44.6270   3
   3   4 -10 150.803 55.5432   2
  -3  -4  10 109.993 50.7258   3
   3   4  -9-12.5885 16.6333   2
   3   4  -9 0.71579 15.0033   6
  -3  -4   9-61.1113 47.6482   6
  -3  -4   9 8.91188 34.0299   3
   3   4  -8 12.0394 21.5878   6
  -3  -4   8 2.02899 21.2270   3
  -3  -4   8-24.1241 41.5822   6
   3   4  -8 17.1128 25.8157   2
   3   4  -7 189.856 54.2195   6
  -3  -4   7 167.926 58.3751   3
  -3  -4   7 331.550 94.5036   6
  -3  -4   6 6766.99 352.173   3
  -3  -4   6 6395.76 523.065   5
   3   4  -6 6798.22 278.985   2
  -3  -4   6 6804.48 383.509   6
  -3  -4   5 1775.93 176.337   3
  -3  -4   5 1727.26 260.738   5
   3   4  -5 1748.60 143.051   6
   3   4  -5 1803.74 130.329   2
  -3  -4   5 1777.15 183.554   6
  -3  -4   4 708.737 105.550   6
   3   4  -4 769.148 88.6571   6
   3   4  -4 703.720 74.6463   2
  -3  -4   4 832.679 169.638   5
  -3  -4   3 5482.87 277.769   6
   3   4  -3 5399.44 208.330   6
  -3  -4   3 5774.54 439.396   5
   3   4  -3 5420.15 175.027   2
  -3  -4   2 3870.53 205.534   1
   3   4  -2 3940.44 161.280   6
  -3  -4   2 3933.01 349.537   5
   3   4  -2 3732.15 117.940   2
   3   4  -1 861.029 70.0102   6
  -3  -4   1 935.491 161.246   5
  -3  -4   1 871.490 94.6096   1
   3   4   0-5.41136 12.0455   6
  -3  -4   0 38.3904 41.1503   5
  -3  -4   0-1.66737 12.8552   1
  -3  -4   0-5.49675 30.5409   4
  -3  -4  -1 321.075 56.1047   1
  -3  -4  -1 358.904 98.1148   5
   3   4   1 300.875 80.9502   5
   3   4   2 3764.03 298.600   5
  -3  -4  -2 4034.40 150.558   1
  -3  -4  -2 4209.89 107.912   2
   3   4   3 1616.48 195.098   5
  -3  -4  -3 1840.31 91.5273   2
  -3  -4  -3 1655.40 84.4280   1
   3   4   4 1979.52 72.1716   1
  -3  -4  -4 2113.44 115.016   2
   3   4   5 9008.05 288.669   6
   3   4   5 9919.61 154.202   1
  -3  -4  -5 9306.42 273.855   2
  -3  -4  -6 122.511 37.1831   2
   3   4   6 122.668 38.1492   6
   3   4   7 8388.96 332.744   6
  -3  -4  -7 8190.57 304.700   2
   3   4   8 797.116 112.106   6
  -3  -4  -8 750.439 99.8077   2
   3   4   9 0.74945 12.3470   6
  -3  -4  -9 10.6925 23.1536   2
  -3  -4 -10 176.728 51.8248   2
   3   4  10 121.871 49.1710   6
  -3  -4 -11 20.0699 25.8937   2
  -3  -4 -12 3761.68 282.349   2
  -3  -4 -13 2986.96 265.750   2
   3   4  14 15.6364 16.8200   1
  -3  -4 -14 46.2245 26.0446   2
   3   4  15-29.7450 23.2291   1
  -3  -4 -15-32.2774 35.9606   2
  -3  -4 -16 473.771 122.345   2
  -3  -4 -17 433.979 117.816   2
   3   5 -14-7.83090 21.7095   2
   3   5 -13-15.0350 23.6850   2
   3   5 -12 37.0327 35.0836   2
   3   5 -11 50.3678 39.5321   2
  -3  -5  11 81.2463 49.7563   3
  -3  -5  10 61.3594 42.7668   3
   3   5 -10 78.1137 48.2161   6
   3   5 -10 116.527 51.9717   2
  -3  -5   9 136.785 60.3316   3
   3   5  -9 113.689 49.3038   6
   3   5  -9 173.295 56.4791   2
   3   5  -8 529.026 89.3059   2
  -3  -5   8 591.549 114.867   3
  -3  -5   8 556.304 138.525   6
   3   5  -8 563.458 102.109   6
  -3  -5   7 197.863 66.3817   3
   3   5  -7 160.869 57.3109   6
  -3  -5   7 91.4147 51.1636   6
  -3  -5   6 223.393 66.3872   3
  -3  -5   6 218.259 77.8270   6
   3   5  -6 234.263 49.8961   2
  -3  -5   5 284.484 79.0957   3
  -3  -5   5 329.821 125.999   5
   3   5  -5 252.740 48.7387   2
  -3  -5   5 228.644 73.4050   6
  -3  -5   4 3247.08 255.103   3
   3   5  -4 2967.08 186.639   6
  -3  -5   4 2991.18 352.534   5
   3   5  -4 2928.97 144.585   2
  -3  -5   4 2771.26 239.726   6
  -3  -5   3 3259.27 348.382   5
   3   5  -3 3355.68 134.455   2
   3   5  -3 3412.93 190.819   6
   3   5  -2 513.974 70.7776   6
   3   5  -2 534.758 42.4684   2
  -3  -5   2 500.075 133.552   5
   3   5  -1 1863.16 133.955   6
  -3  -5   1 1539.12 226.205   5
  -3  -5   1 1794.93 228.752   4
   3   5   0 4661.32 218.837   6
  -3  -5   0 4973.63 393.504   5
  -3  -5   0 4178.63 272.458   4
  -3  -5  -1 5230.80 398.702   5
  -3  -5  -2 938.595 82.3023   1
   3   5   2 925.033 99.4047   4
  -3  -5  -2 1123.20 61.2989   2
   3   5   3 5885.86 165.160   2
  -3  -5  -3 5822.43 167.903   2
  -3  -5  -3 5683.57 162.190   1
   3   5   4 350.634 49.6504   2
  -3  -5  -4 314.722 46.8964   2
   3   5   5 43.3508 21.2166   2
  -3  -5  -5 33.9768 20.2124   2
   3   5   6 124.632 36.7060   2
  -3  -5  -6 160.344 42.4818   2
   3   5   7 2535.58 185.170   6
   3   5   7 2774.46 183.764   2
  -3  -5  -7 2542.61 174.234   2
   3   5   8 3276.87 226.435   6
  -3  -5  -8 3080.89 206.853   2
   3   5   8 3171.89 98.9303   1
   3   5   9 662.567 107.469   6
  -3  -5  -9 636.344 101.320   2
   3   5   9 608.170 54.6474   1
   3   5  10 5.41952 8.32818   1
   3   5  10 88.6901 47.3836   6
  -3  -5 -10 28.4947 30.2510   2
   3   5  11 4035.00 182.163   1
  -3  -5 -11 3944.72 280.389   2
   3   5  12 18.1410 16.5874   1
  -3  -5 -12 98.2603 50.1906   2
  -3  -5 -13 103.819 51.9265   2
   3   5  13 94.7849 31.2658   1
  -3  -5 -14 54.7514 42.8768   2
  -3  -5 -15-23.1907 32.0005   2
  -3  -5 -16 403.497 115.109   2
  -3  -5 -17 78.5961 44.6209   2
   3   6 -13 59.1051 39.5009   2
   3   6 -12 136.116 56.0544   2
  -3  -6  12 170.692 76.6357   3
  -3  -6  11-29.5709 29.8982   3
   3   6 -11 2.55525 28.8437   6
   3   6 -11 2.37494 29.3841   2
  -3  -6  10 295.773 87.5693   3
   3   6 -10 221.197 75.5311   6
   3   6 -10 134.736 48.5110   2
   3   6  -9 79.2811 44.8341   6
  -3  -6   9 72.5610 51.7091   3
   3   6  -9 67.6628 35.6747   2
  -3  -6   8 542.888 154.041   6
   3   6  -8 485.792 102.768   6
  -3  -6   8 437.594 104.199   3
   3   6  -8 425.332 78.7101   2
  -3  -6   7 1437.47 227.304   6
   3   6  -7 1566.24 171.238   6
  -3  -6   7 1574.76 187.413   3
  -3  -6   6 1529.57 182.180   3
   3   6  -6 1470.85 158.603   6
   3   6  -6 1539.41 128.181   2
  -3  -6   5 1375.21 173.358   3
   3   6  -5 1243.69 105.357   2
  -3  -6   5 1213.49 250.995   5
  -3  -6   4 2143.71 220.905   3
  -3  -6   4 2208.78 318.981   5
   3   6  -4 2090.29 120.993   2
   3   6  -3 2287.02 179.317   6
   3   6  -3 2224.03 108.471   2
  -3  -6   3 2307.66 317.595   5
  -3  -6   3 2343.65 233.308   3
  -3  -6   2 3995.77 400.868   5
   3   6  -2 3722.15 115.964   2
   3   6  -2 3846.11 228.674   6
  -3  -6   2 4113.88 427.815   4
   3   6  -1 1787.96 159.488   6
  -3  -6   1 1816.45 263.459   5
   3   6  -1 1865.28 60.3574   2
  -3  -6   1 1550.99 216.970   4
   3   6  -1 1845.44 73.4420   2
  -3  -6   0 1128.97 203.327   5
  -3  -6   0 1189.50 183.027   4
  -3  -6  -1 12592.0 657.388   5
  -3  -6  -2 11808.5 226.282   2
   3   6   2 12483.9 199.331   2
   3   6   2 10981.4 434.649   4
   3   6   3 1185.81 76.4790   2
  -3  -6  -3 1318.36 92.5586   2
  -3  -6  -4 9364.55 179.191   1
   3   6   4 10169.2 259.171   2
  -3  -6  -4 10017.7 271.628   2
   3   6   5 5.13766 8.67299   2
  -3  -6  -5 14.1193 12.9145   2
   3   6   6 964.499 101.347   2
  -3  -6  -6 1100.54 107.604   2
   3   6   7 629.844 85.7231   2
  -3  -6  -7 530.935 82.8395   2
   3   6   8 2281.29 192.979   6
   3   6   8 2344.52 183.074   2
  -3  -6  -8 2217.62 177.471   2
  -3  -6  -9 627.254 106.524   2
   3   6   9 394.638 88.4686   6
   3   6   9 363.623 79.4017   2
   3   6  10 65.5577 19.0242   1
   3   6  10 28.3402 29.6213   2
   3   6  10 24.6015 16.5133   6
  -3  -6 -10 54.3773 30.2068   2
  -3  -6 -11 4315.34 297.289   2
   3   6  11 4117.29 176.516   1
   3   6  12 46.2199 19.7175   1
  -3  -6 -12 70.5123 42.1922   2
   3   6  13 17.4433 8.97257   1
  -3  -6 -13-43.6543 48.7730   2
   3   6  14 461.435 82.8380   1
  -3  -6 -14 522.141 120.596   2
  -3  -6 -15 268.277 96.0265   2
  -3  -6 -16 699.738 152.404   2
  -3  -6 -17 430.741 125.296   2
  -3  -7  12 42.2034 54.2123   3
   3   7 -12 16.2806 28.4726   6
   3   7 -12 66.8211 40.3583   2
  -3  -7  11-5.38734 24.0763   3
   3   7 -11-4.39973 27.4318   6
   3   7 -11 0.59325 25.2799   2
   3   7 -10-4.74209 21.6371   6
  -3  -7  10 9.27857 21.8711   3
   3   7 -10-8.91972 25.7396   2
  -3  -7   9 18.4819 43.8231   3
   3   7  -9-27.8888 34.9671   6
   3   7  -9 9.17197 13.9384   2
   3   7  -8 21.8169 20.5130   6
  -3  -7   8 4.15520 31.2011   3
   3   7  -8 18.0542 17.6794   2
  -3  -7   7 1329.86 179.928   3
   3   7  -7 962.656 142.535   6
   3   7  -6 132.703 46.6657   6
  -3  -7   6 73.4243 45.7091   3
  -3  -7   5 1110.08 163.617   3
   3   7  -5 945.233 131.725   6
   3   7  -5 1081.99 99.0169   2
  -3  -7   4 315.410 86.1842   3
  -3  -7   4 349.659 141.305   5
   3   7  -4 276.563 45.1521   2
  -3  -7   4 331.203 160.161   4
   3   7  -3 1219.97 222.493   5
  -3  -7   3 872.725 209.165   5
   3   7  -3 963.596 74.5236   2
  -3  -7   3 1150.24 260.980   4
  -3  -7   3 1046.14 160.950   3
   3   7  -2-22.1373 36.2445   6
  -3  -7   2 12.7453 36.8839   5
   3   7  -2 25.5808 11.2547   2
  -3  -7   2 47.0848 44.0491   4
   3   7  -1 418.251 44.6203   2
  -3  -7   1 548.413 157.852   5
   3   7  -1 422.346 87.7771   6
  -3  -7   1 414.763 127.799   4
   3   7   0 5593.46 145.822   2
  -3  -7   0 6424.16 516.561   5
  -3  -7   0 5825.85 460.771   4
   3   7   1 98.2824 18.9078   2
  -3  -7  -1 83.8972 53.6863   5
   3   7   2 737.729 57.2652   2
   3   7   2 600.720 124.379   4
  -3  -7  -3 9220.12 264.850   2
   3   7   3 8999.68 224.076   2
   3   7   3 8315.02 473.919   4
   3   7   4 1141.02 89.7268   2
  -3  -7  -4 1125.94 103.245   2
  -3  -7  -5 220.945 22.7727   1
   3   7   5 216.996 42.9651   2
  -3  -7  -5 243.920 51.1775   2
   3   7   6 134.486 38.1290   2
  -3  -7  -6 135.311 37.0376   2
  -3  -7  -7 111.167 39.5490   2
   3   7   7 177.493 47.9384   2
  -3  -7  -8 83.4318 34.8757   2
   3   7   8 100.132 37.9903   2
   3   7   9 103.642 41.6338   2
  -3  -7  -9 68.8284 31.3843   2
   3   7  10 99.2808 50.3917   6
  -3  -7 -10 89.2548 39.4526   2
   3   7  10 81.2645 38.8611   2
  -3  -7 -11 381.177 89.3846   2
  -3  -7 -12 334.997 89.9463   2
  -3  -7 -13 63.9513 33.7841   2
   3   7  13 55.6463 29.8208   1
  -3  -7 -14-1.56878 31.6935   2
   3   7  14 26.7085 21.5830   1
  -3  -7 -15 480.147 121.426   2
  -3  -7 -16 231.750 84.1087   2
  -3  -7 -17-2.56343 20.7929   2
   3   8 -13-22.4725 34.4586   6
   3   8 -12-76.8429 53.7944   6
  -3  -8  12-126.959 67.9369   3
   3   8 -11 40.0830 34.6675   6
  -3  -8  11 35.1062 36.4464   3
   3   8 -11-10.8285 19.2786   2
  -3  -8  10-43.8576 39.3313   3
   3   8 -10 12.5661 26.4734   6
   3   8 -10-38.4387 28.4988   2
  -3  -8   9 143.407 69.8207   3
   3   8  -9 41.5279 22.4956   2
   3   8  -9 102.748 53.2639   6
   3   8  -8 10.5970 21.3935   6
   3   8  -8-2.76470 10.4942   2
  -3  -8   8 57.0311 50.3066   3
  -3  -8   7 634.615 129.345   3
   3   8  -7 559.252 114.463   6
   3   8  -6 234.554 71.8464   6
  -3  -8   6 183.138 69.9226   3
  -3  -8   6 173.185 154.960   4
   3   8  -5 338.336 85.7837   6
   3   8  -5 351.105 56.8684   2
  -3  -8   5 377.960 102.386   3
  -3  -8   5 330.790 170.861   4
  -3  -8   4 289.965 88.8406   3
   3   8  -4 266.626 46.6318   2
   3   8  -4 231.269 71.2442   6
  -3  -8   4 133.035 98.8549   4
   3   8  -3 113.546 26.8577   2
   3   8  -3 148.430 93.1685   5
  -3  -8   3 247.296 127.713   4
  -3  -8   2-30.6003 47.4494   5
   3   8  -2 82.0522 71.0801   5
  -3  -8   2 62.6526 72.3800   4
   3   8  -2 47.1753 16.2368   2
   3   8  -1 26.5559 25.3573   5
   3   8  -1 13.5048 12.6824   2
  -3  -8   1-45.1413 78.5647   4
  -3  -8   1 8.52015 47.8315   5
   3   8   0 4489.08 428.357   5
  -3  -8   0 4621.67 447.262   4
   3   8   0 4990.52 175.371   2
  -3  -8   0 4846.26 479.021   5
  -3  -8  -1 1003.75 210.652   5
   3   8   1 864.160 69.5714   2
   3   8   2-7.96139 12.5555   2
   3   8   2 8.66918 35.5934   4
   3   8   3 85.7243 60.0208   4
  -3  -8  -3 6.99554 10.2697   2
   3   8   3 23.0708 14.5218   2
  -3  -8  -4-10.9628 15.4656   2
   3   8   4-55.2267 83.2936   4
   3   8   4 1.56849 9.15139   2
   3   8   5 638.949 78.7728   2
  -3  -8  -5 634.785 88.0480   2
  -3  -8  -6 320.426 68.3055   2
   3   8   6 375.864 63.0818   2
   3   8   7 766.810 97.2326   2
  -3  -8  -7 713.991 103.256   2
   3   8   8 94.4712 34.2765   2
  -3  -8  -8 19.9135 20.1549   2
   3   8   9 2798.74 216.777   2
  -3  -8  -9 2751.12 223.867   2
  -3  -8 -10 4116.53 284.171   2
   3   8  10 4081.26 274.520   2
  -3  -8 -11 87.3904 45.5957   2
  -3  -8 -12 187.715 73.6135   2
  -3  -8 -13 210.227 71.0455   2
  -3  -8 -14-39.5974 47.0575   2
  -3  -8 -15 572.315 131.332   2
  -3  -8 -16 194.463 71.9483   2
  -3  -8 -17 63.8967 51.5464   2
   3   9 -12 150.002 80.0597   6
  -3  -9  12 178.400 85.1104   3
  -3  -9  11-68.5912 49.5767   3
   3   9 -11 14.6731 26.3515   6
  -3  -9  10-80.9110 51.3775   3
   3   9 -10 17.3197 28.3142   6
  -3  -9   9-19.1121 19.0734   3
   3   9  -9 39.7425 34.0185   6
   3   9  -9 10.2932 16.0711   2
  -3  -9   8 561.046 129.177   3
   3   9  -8 391.001 105.430   6
   3   9  -8 430.782 79.6503   2
  -3  -9   7 39.2062 36.6256   3
   3   9  -7 54.8523 40.6651   6
   3   9  -7 77.2350 28.9366   2
  -3  -9   6 87.2823 45.0240   3
   3   9  -6 103.753 49.3406   6
   3   9  -5-13.4390 11.5274   2
   3   9  -5 24.3483 26.6156   6
  -3  -9   5 45.5056 27.8587   3
  -3  -9   5 88.1822 112.073   4
  -3  -9   4 530.893 125.674   3
   3   9  -4 551.369 69.0012   2
   3   9  -4 513.943 112.844   6
  -3  -9   4 348.345 160.079   4
   3   9  -3 3444.35 299.128   6
   3   9  -3 3319.37 161.212   2
  -3  -9   3 3460.48 488.119   4
   3   9  -3 3474.17 417.494   5
   3   9  -2 2847.72 362.431   5
   3   9  -2 2642.57 155.980   2
   3   9  -2 2461.88 253.363   6
  -3  -9   2 2316.78 381.719   4
  -3  -9   1 17.2822 79.7131   5
   3   9  -1 89.9668 71.7636   5
   3   9  -1 59.2150 22.6954   2
  -3  -9   1 45.5530 58.9689   4
  -3  -9   0 5262.32 527.096   5
   3   9   0 4740.57 463.384   5
  -3  -9   0 4837.24 502.921   4
   3   9   0 4972.96 203.760   2
   3   9   1 1251.41 233.723   5
   3   9   1 1427.43 106.731   2
   3   9   2 91.6790 63.7538   5
   3   9   2 35.6153 18.1804   2
   3   9   2-53.3732 76.7180   4
   3   9   3 6079.18 517.579   5
   3   9   3 7361.36 539.230   4
   3   9   4 2.69544 54.5482   4
  -3  -9  -4 43.9441 28.9733   2
   3   9   4 37.1397 17.6235   2
  -3  -9  -5 60.1226 29.2767   2
   3   9   5-11.9122 64.4921   4
   3   9   5 96.8995 34.1349   2
   3   9   6 1027.04 112.547   2
  -3  -9  -6 1369.52 148.827   2
   3   9   7 2708.00 191.180   2
  -3  -9  -7 2791.66 216.617   2
   3   9   8 1055.96 125.344   2
  -3  -9  -8 971.767 132.962   2
  -3  -9  -9 131.170 60.1332   2
   3   9   9 148.529 53.8498   2
   3   9  10 715.389 118.111   2
  -3  -9 -10 698.879 126.462   2
  -3  -9 -11 107.649 51.0774   2
  -3  -9 -12 113.586 51.4455   2
  -3  -9 -13 119.720 54.6742   2
  -3  -9 -14 14.5724 24.3159   2
  -3  -9 -15 88.7401 56.4929   2
  -3  -9 -16 162.502 84.7333   2
  -3  -9 -17 275.157 107.359   2
  -3 -10  11 19.5874 27.7908   3
   3  10 -11 84.8898 73.3260   6
  -3 -10  10-66.7500 48.0968   3
   3  10 -10 95.9983 60.1045   6
   3  10  -9 51.2218 51.3698   6
  -3 -10   9 68.5588 47.0615   3
  -3 -10   8 266.438 95.4652   3
   3  10  -8 193.603 80.5423   6
  -3 -10   7 68.0077 32.5569   3
   3  10  -7 98.1851 57.0309   6
   3  10  -7 63.6812 32.8975   2
  -3 -10   6-32.5561 34.5951   3
   3  10  -6 2.25149 36.2203   6
   3  10  -5 179.905 73.4181   6
  -3 -10   5 170.635 78.6081   3
  -3 -10   4 70.6666 53.1783   3
   3  10  -4 39.2089 26.3482   6
   3  10  -3 403.521 67.5445   2
   3  10  -3 465.312 113.753   6
   3  10  -3 526.173 168.199   5
  -3 -10   3 322.139 190.540   4
   3  10  -2 127.482 69.2167   6
   3  10  -2 41.5264 80.6974   5
  -3 -10   2-53.4267 99.2034   4
   3  10  -2 132.369 38.6610   2
   3  10  -1 10170.2 331.746   2
   3  10  -1 9347.04 525.632   6
   3  10  -1 9125.90 665.999   5
  -3 -10   1 9160.73 791.386   4
   3  10   0 5058.72 499.395   5
   3  10   0 5526.16 241.389   2
   3  10   1 1532.30 270.701   5
   3  10   1 2005.35 142.849   2
   3  10   2 151.360 38.6559   2
   3  10   2 164.302 85.2186   5
   3  10   2 22.6664 49.6603   4
   3  10   3 249.698 50.2399   2
   3  10   3 191.918 97.6692   5
   3  10   3 264.075 105.186   4
   3  10   4 161.177 86.8975   5
   3  10   4 245.344 123.991   4
   3  10   4 107.705 35.0767   2
   3  10   5-10.6973 54.4782   5
  -3 -10  -5 42.2219 27.2867   2
   3  10   5 29.5456 18.5712   2
   3  10   6 34.6814 47.0899   5
  -3 -10  -6-11.1809 25.4538   2
   3  10   6 6.91825 14.3257   2
  -3 -10  -7-37.3026 44.2800   2
   3  10   7 8.53248 27.4765   2
  -3 -10  -8 19.2896 22.0439   2
   3  10   8 51.0340 24.8993   2
   3  10   9 962.896 132.215   2
  -3 -10  -9 776.807 132.390   2
  -3 -10 -10 464.393 104.655   2
  -3 -10 -11 369.099 95.0907   2
  -3 -10 -12-28.4227 41.2261   2
  -3 -10 -13 37.9678 45.1700   2
  -3 -10 -14 443.763 121.026   2
  -3 -10 -15 119.588 69.5113   2
  -3 -10 -16 44.6610 49.4805   2
  -3 -10 -17 470.608 144.321   2
  -3 -11  10-100.288 59.5127   3
   3  11 -10-2.11191 21.7945   6
  -3 -11   9 24.8554 19.9510   3
   3  11  -9 62.8837 47.0498   6
  -3 -11   8 83.8794 53.0980   3
   3  11  -8 122.036 68.6221   6
   3  11  -7 48.5190 42.5535   6
  -3 -11   7 26.6464 18.1126   3
  -3 -11   6-28.1008 40.0704   3
   3  11  -6 59.1657 42.7428   6
   3  11  -6 16.8425 18.5435   2
  -3 -11   5 34.2233 33.5670   3
   3  11  -5 22.2588 49.7489   6
  -3 -11   4 201.099 81.9286   3
   3  11  -4 201.086 79.4327   6
   3  11  -3 907.448 112.412   2
   3  11  -3 977.389 176.232   6
   3  11  -3 1390.71 281.387   5
  -3 -11   3 1021.16 319.716   4
   3  11  -2 162.466 81.3436   6
   3  11  -2 81.8540 86.1049   5
   3  11  -2 3.22688 19.9541   2
  -3 -11   2 231.504 143.126   4
   3  11  -1 3132.06 408.546   5
  -3 -11   1 3091.15 490.588   4
   3  11  -1 3316.36 206.582   2
   3  11  -1 2907.69 314.765   6
   3  11   0 97.4961 36.1173   2
   3  11   0 150.223 102.631   5
   3  11   1 136.184 42.2584   2
   3  11   1 52.1925 47.5682   5
   3  11   2 118.635 36.8052   2
   3  11   2 134.604 99.9837   5
   3  11   3 149.956 44.4086   2
   3  11   3 127.541 90.5827   5
   3  11   4-2.39006 16.4382   2
   3  11   4-72.3392 76.2514   5
   3  11   5 143.593 93.3968   5
   3  11   5 140.252 41.6268   2
  -3 -11  -5 125.108 43.9439   2
  -3 -11  -6 1075.65 144.793   2
   3  11   6 1303.26 142.458   2
   3  11   6 1148.90 268.822   5
   3  11   6 913.588 240.194   4
   3  11   7 1488.53 305.764   5
  -3 -11  -7 1537.06 179.316   2
   3  11   7 1539.25 160.474   2
  -3 -11  -8 121.483 52.8252   2
   3  11   8 263.133 69.4165   2
  -3 -11  -9 195.709 73.4874   2
   3  11   9 207.096 67.1621   2
  -3 -11 -10 38.9843 28.7138   2
  -3 -11 -11 78.2116 42.6764   2
  -3 -11 -12-18.8238 28.5431   2
  -3 -11 -13 35.6386 40.2201   2
  -3 -11 -14 606.096 144.351   2
  -3 -11 -15 344.692 116.901   2
  -3 -11 -16 80.5889 60.5859   2
  -3 -11 -17 105.227 70.6211   2
  -3 -12   9 52.8643 43.8335   3
   3  12  -9-71.5189 54.9452   6
  -3 -12   8 102.389 59.3615   3
   3  12  -8-77.4088 55.2617   6
  -3 -12   7 87.7428 57.2581   3
   3  12  -7 113.347 66.8289   6
  -3 -12   6 39.7897 40.1461   3
   3  12  -6 85.5678 57.7045   6
  -3 -12   5 71.9919 58.3378   3
   3  12  -5 19.8783 28.8215   6
   3  12  -4-12.5802 30.9629   6
  -3 -12   4 37.0445 38.4380   3
  -3 -12   3 52.2777 46.3477   3
   3  12  -3 110.036 76.1295   6
   3  12  -2 636.042 149.131   6
   3  12  -2 791.274 214.922   5
  -3 -12   2 722.409 261.145   4
   3  12  -1 1142.29 204.215   6
   3  12  -1 1083.27 248.236   5
   3  12  -1 1289.27 138.350   2
   3  12   0 3172.30 426.413   5
   3  12   0 2397.22 295.758   6
   3  12   1 154.324 93.2121   5
   3  12   1 359.782 71.3327   2
   3  12   2 661.540 95.7420   2
   3  12   2 570.828 175.862   5
   3  12   2 661.569 215.938   4
   3  12   3 415.875 162.544   5
   3  12   3 479.893 84.2151   2
   3  12   3 350.404 173.952   4
   3  12   4 47.9212 24.6533   2
   3  12   4-77.3570 81.6472   5
   3  12   4-27.7587 69.2872   4
   3  12   5-69.0522 72.7249   5
   3  12   5 14.2507 48.9345   4
   3  12   5 34.1673 26.3523   2
   3  12   6 472.137 91.4247   2
   3  12   6 907.088 249.050   5
   3  12   6 716.813 233.853   4
  -3 -12  -6 522.965 104.634   2
   3  12   7 86.4145 71.8937   5
  -3 -12  -7 27.5812 21.9246   2
   3  12   8 273.741 144.737   5
  -3 -12  -8 217.362 77.8895   2
   3  12   8 82.0703 42.2529   2
  -3 -12  -9 526.241 116.411   2
  -3 -12 -10 45.0967 45.9565   2
  -3 -12 -11 71.6503 49.0663   2
  -3 -12 -12 265.645 97.0798   2
  -3 -12 -13 56.8682 51.1614   2
  -3 -12 -14-8.35282 39.2297   2
  -3 -12 -15 118.733 57.5698   2
  -3 -12 -16 110.876 62.9128   2
  -3 -13   8 26.3822 32.4603   3
   3  13  -8 23.3484 36.1463   6
  -3 -13   7 125.136 65.9888   3
   3  13  -7-2.75861 32.1411   6
   3  13  -6-48.3819 46.8883   6
  -3 -13   6-52.6640 45.3315   3
  -3 -13   5-55.9629 32.3298   3
   3  13  -5 32.7018 24.7483   6
   3  13  -4-116.834 69.9127   6
  -3 -13   4 101.403 63.8243   3
   3  13  -3 30.2391 35.5233   6
  -3 -13   3 14.4256 30.8801   3
   3  13  -2 1010.44 254.253   5
   3  13  -2 809.341 180.179   6
   3  13  -1 41.7095 39.7132   6
   3  13  -1-87.3338 77.8325   5
   3  13   0 35.8521 43.5423   6
   3  13   0 105.478 92.2150   5
   3  13   1 324.797 69.3330   2
   3  13   1 259.282 112.501   5
   3  13   2 893.283 119.698   2
   3  13   2 921.764 244.421   5
   3  13   3 34.9700 31.7624   2
   3  13   3 30.1448 53.7170   5
   3  13   3 113.388 102.879   4
   3  13   4 0.47871 19.0297   2
   3  13   4-15.1020 47.0127   5
   3  13   4 59.2241 76.4907   4
   3  13   5 325.002 163.550   5
   3  13   5 45.6638 67.3022   4
   3  13   5 317.165 74.9629   2
  -3 -13  -6 206.194 66.3742   2
   3  13   6 165.680 116.793   5
   3  13   6 222.958 144.345   4
   3  13   6 205.073 61.4221   2
   3  13   7 162.507 118.712   4
   3  13   7 251.912 123.325   5
   3  13   7 263.231 72.8280   2
  -3 -13  -7 197.953 66.8215   2
   3  13   8 4.69609 52.5811   5
   3  13   8-5.13279 49.8879   4
  -3 -13  -8-2.26361 24.8198   2
   3  13   9 183.998 116.528   5
  -3 -13  -9 81.9394 58.2965   2
  -3 -13 -10 63.3130 55.5520   2
  -3 -13 -11-4.01317 22.7609   2
  -3 -13 -12 77.6286 57.6409   2
  -3 -13 -13-6.02259 23.2387   2
  -3 -13 -14 52.7130 45.4069   2
  -3 -13 -15 72.4789 57.8779   2
  -3 -13 -16 14.7578 33.5174   2
   3  14  -7 7.09660 25.5419   6
  -3 -14   7 104.236 60.6920   3
  -3 -14   6 128.433 67.8561   3
   3  14  -6 229.699 106.635   6
  -3 -14   5 0.24949 34.9375   3
   3  14  -5-60.7453 53.4716   6
  -3 -14   4 2.85769 40.0214   3
   3  14  -4-89.4349 62.4936   6
  -3 -14   3 14.1154 26.5368   3
   3  14  -3 4.66195 46.9477   6
   3  14  -2 280.719 119.156   6
   3  14  -2 297.552 151.978   5
   3  14  -1 252.768 144.618   5
   3  14  -1-73.7907 59.4718   6
   3  14   0 27.7377 38.0685   6
   3  14   0 137.703 113.993   5
   3  14   1-55.2743 69.9262   5
   3  14   2 18.9216 46.6358   5
   3  14   3 187.243 144.148   5
   3  14   3 70.7168 92.5059   4
   3  14   4 566.087 186.813   5
   3  14   4 303.910 158.173   4
   3  14   5 1327.31 310.617   5
   3  14   5 1433.58 167.735   2
   3  14   5 872.774 261.893   4
   3  14   6 278.822 141.904   5
   3  14   6 401.660 187.236   4
  -3 -14  -7 262.899 92.2438   2
   3  14   7 89.9240 119.163   4
   3  14   8-20.7461 55.5810   5
   3  14   8 0.72128 84.1811   4
  -3 -14  -8-43.9678 47.6656   2
   3  14   9 82.2077 96.7814   5
   3  14   9-86.8839 106.332   4
  -3 -14  -9 131.222 69.1300   2
   3  14  10-126.491 114.797   5
   3  14  10-158.921 141.205   4
  -3 -14 -10-0.92357 16.4184   2
  -3 -14 -11 110.811 66.6099   2
  -3 -14 -12-54.7202 48.0503   2
  -3 -14 -13 123.265 75.3746   2
  -3 -14 -14-26.8639 39.3267   2
  -3 -14 -15-147.501 81.4873   2
   3  15  -5-63.2329 54.5583   6
  -3 -15   5 49.5829 37.2622   3
   3  15  -4-194.770 94.6209   6
  -3 -15   4 42.6695 42.2581   3
  -3 -15   3 10.1320 31.0545   3
   3  15  -3 70.9895 52.4845   6
   3  15  -2 595.953 168.848   6
   3  15  -2 728.642 233.632   5
   3  15  -1-147.621 84.5458   6
   3  15  -1 76.9441 75.0638   5
   3  15   0 93.5861 67.3462   6
   3  15   0 186.353 136.614   5
   3  15   1-56.7929 54.9788   6
   3  15   1 89.7140 87.2147   5
   3  15   2 58.5280 31.7937   5
   3  15   3 193.688 116.735   5
   3  15   4 54.2491 70.7226   5
   3  15   4 148.166 123.406   4
   3  15   5 10.3749 45.4184   5
   3  15   5-0.60080 73.3173   4
   3  15   6 74.0689 83.7270   5
   3  15   6 109.492 105.180   4
   3  15   7 82.0018 88.9710   5
   3  15   7-126.713 118.195   4
  -3 -15  -8 86.8282 57.0910   2
   3  15   8 22.7365 57.6194   5
  -3 -15  -9 161.356 73.6450   2
   3  15   9 246.190 175.876   4
   3  15  10-359.698 189.053   5
   3  15  10-150.119 140.911   4
  -3 -15 -10 91.6059 59.0161   2
   3  15  11 158.726 133.136   5
   3  15  11-40.0373 90.3616   4
  -3 -15 -11 39.7725 30.2597   2
  -3 -15 -12 1.64163 18.4582   2
  -3 -15 -13 1.42983 21.0907   2
  -3 -15 -14-9.24935 26.5367   2
  -3 -15 -15 78.1625 62.9016   2
   3  16  -3-1.33823 19.3223   6
  -3 -16   3 111.732 70.3900   3
  -3 -16   2 16.5697 29.3521   3
   3  16  -2-81.8432 64.8357   6
   3  16  -1 4.90437 29.1693   6
   3  16  -1-111.318 98.1580   5
   3  16   0 51.5341 59.8568   6
   3  16   0 143.908 109.323   5
   3  16   1-147.770 92.1685   6
   3  16   1 20.9818 54.4708   5
   3  16   2 144.687 129.322   5
   3  16   3 51.8184 74.7763   5
   3  16   4 51.6740 62.7509   5
   3  16   4 0.80511 66.8445   4
   3  16   5 159.819 117.911   5
   3  16   5-12.8314 55.1009   4
   3  16   6 34.2484 61.3303   5
   3  16   6-113.485 111.698   4
   3  16   7 96.2525 97.9049   5
   3  16   7 50.9104 78.0340   4
   3  16   8 29.3269 88.4662   5
   3  16   8-75.9697 97.6321   4
   3  16   9 261.541 154.486   5
   3  16   9 0.89653 148.287   4
  -3 -16 -10 77.8197 55.4777   2
   3  16  10 162.762 114.235   5
   3  16  10-0.97660 132.771   4
   3  16  11 169.527 131.190   5
  -3 -16 -11 47.5839 42.1486   2
   3  16  12-62.1226 101.948   4
  -3 -16 -12-34.7976 40.6276   2
  -3 -16 -13 18.2810 34.3266   2
  -3 -16 -14-28.5495 40.6713   2
   3  17  -1 59.6239 59.6548   6
   3  17   0-196.754 105.222   6
   3  17   1 62.1830 62.7530   6
   3  17   2-86.5312 72.4187   6
   3  17   2 10.4651 46.6934   5
   3  17   3-13.7829 46.8304   5
   3  17   4-1.82231 40.7843   5
   3  17   5 70.6557 85.7025   5
   3  17   5 417.255 231.801   4
   3  17   6 78.6316 110.620   5
   3  17   6-7.88319 51.1347   4
   3  17   7 226.988 148.319   5
   3  17   7-130.260 130.614   4
   3  17   8-51.8694 77.1566   5
   3  17   8 117.760 130.066   4
   3  17   9-148.117 126.906   5
   3  17   9-240.072 181.537   4
   3  17  10-11.4043 59.8240   4
  -3 -17 -11-86.8394 61.7379   2
   3  17  11-75.7732 118.169   4
  -3 -17 -12-45.0924 49.1834   2
   3  17  12 104.972 133.150   4
   3  17  13-910.873 393.401   4
   4 -14  -8-121.003 69.3238   1
   4 -14  -7-0.26338 23.7909   1
   4 -13  -9-9.40493 25.8210   1
   4 -13  -8-64.4333 51.9643   1
   4 -13  -7 8.28534 89.8383   1
   4 -13  -6 83.8152 83.6289   1
  -4  13   6-275.613 228.451   4
  -4  13   5 362.929 258.340   4
  -4  13   4-52.0797 118.198   4
  -4  13   3 63.3230 115.888   4
  -4  13   2-75.4418 118.116   4
  -4  13   1-411.140 256.241   4
  -4  13   0-45.4060 94.4564   4
  -4  13  -1-9.69839 67.7830   4
   4 -12 -11-80.5642 51.9750   1
   4 -12 -10 64.4219 52.1491   1
   4 -12  -9 59.1626 52.9997   1
  -4  12   9 1.26107 236.098   4
   4 -12  -8 230.360 87.2472   1
  -4  12   8 547.149 311.623   4
   4 -12  -7 19.5911 23.6567   1
  -4  12   7 82.6567 135.601   4
   4 -12  -6 468.118 123.228   1
  -4  12   6 658.275 344.503   4
  -4  12   5 83.7951 125.933   4
  -4  12   4-128.130 156.676   4
  -4  12   3-1.04148 115.150   4
  -4  12   2 309.049 237.127   4
  -4  12   1-121.248 137.850   4
  -4  12   0 140.597 153.718   4
  -4  12  -1-233.280 236.463   4
  -4  12  -2 6.28369 40.2461   6
  -4  12  -3 221.291 124.769   6
  -4  12  -4 214.349 113.971   6
   4 -11 -12-13.5093 23.9363   1
   4 -11 -11 163.779 59.3070   1
   4 -11 -10 278.154 103.808   2
   4 -11 -10 118.547 61.6562   1
   4 -11  -9 52.5869 23.5458   2
   4 -11  -9 33.9694 34.9946   1
   4 -11  -8 31.2189 38.2941   1
  -4  11   8 119.263 153.201   4
   4 -11  -7 123.594 57.5435   1
  -4  11   7 346.921 239.062   4
  -4  11   6 1004.86 223.844   5
   4 -11  -6 1181.45 187.546   1
  -4  11   6 646.879 332.437   4
  -4  11   5 69.0050 59.2276   5
  -4  11   5 112.665 159.127   4
  -4  11   4 184.021 88.7450   5
  -4  11   4 101.518 142.347   4
  -4  11   3 113.012 66.6108   5
  -4  11   3 116.405 159.488   4
  -4  11   2 286.583 106.833   5
  -4  11   2 324.230 219.283   4
  -4  11   1-3.48219 22.8377   5
  -4  11   1-232.003 179.317   4
  -4  11   0 186.040 164.121   4
  -4  11  -1-128.198 146.654   4
  -4  11  -2 426.858 163.548   6
  -4  11  -2 306.069 192.891   4
  -4  11  -3 45.5647 69.7248   6
  -4  11  -4 105.168 102.053   6
  -4  11  -5 9.47197 36.0250   6
  -4  11  -6-30.9864 68.4049   6
   4 -10 -13 99.7088 57.6858   1
   4 -10 -12-50.5825 40.5138   1
   4 -10 -11-17.4898 28.0642   1
   4 -10 -11 233.141 110.176   2
   4 -10 -10 8.95924 27.6670   1
   4 -10 -10 120.785 86.3313   2
   4 -10  -9 37.6515 36.1960   2
   4 -10  -9-46.5931 39.5524   1
   4 -10  -8 57.3984 50.0633   1
   4 -10  -8 47.5186 58.8355   2
  -4  10   7 395.653 296.991   4
   4 -10  -7 52.5590 25.0289   1
   4 -10  -6 737.895 146.841   1
  -4  10   6 553.948 285.506   4
   4 -10  -5 124.663 49.7222   3
  -4  10   5 157.790 92.8107   5
  -4  10   5-27.8139 67.0723   4
   4 -10  -4 38.9972 24.8796   3
  -4  10   4 189.764 86.8778   5
  -4  10   4 175.730 170.014   4
   4 -10  -3 696.109 97.0704   3
  -4  10   3 636.808 154.668   5
  -4  10   3 584.039 300.582   4
  -4  10   2 46.9264 48.0759   5
  -4  10   2 35.7998 116.862   4
  -4  10   1-31.5912 37.2217   5
  -4  10   1 100.970 93.0641   4
  -4  10   0 57.5189 43.1848   5
  -4  10   0-56.5208 95.4598   4
  -4  10  -1 36.2645 83.3232   4
  -4  10  -2 229.036 120.867   6
  -4  10  -2 319.787 249.261   4
  -4  10  -3 1.21183 38.8215   6
  -4  10  -4 227.246 120.355   6
  -4  10  -5-70.5015 68.0226   6
  -4  10  -6-11.9447 41.6503   6
  -4  10  -7-65.1684 66.1228   6
  -4  10  -8-154.866 92.7117   6
   4  -9 -12-26.7317 30.9426   1
   4  -9 -12 10.1120 57.1719   2
   4  -9 -11 97.3174 49.2137   1
   4  -9 -11-48.0645 48.9141   2
   4  -9 -10-43.9051 47.7514   2
   4  -9 -10 73.5626 39.5830   1
   4  -9  -9 3.42363 19.9273   1
   4  -9  -9 48.0661 46.3187   2
   4  -9  -8 358.862 94.2741   1
   4  -9  -8 380.893 118.997   2
   4  -9  -7 1075.87 196.378   2
   4  -9  -7 1110.81 172.597   1
   4  -9  -6 368.823 85.6365   3
  -4   9   6 618.279 293.204   4
   4  -9  -6 473.106 108.385   1
   4  -9  -5 4.86604 9.96079   3
  -4   9   5 228.384 186.893   4
  -4   9   4 0.23368 35.9108   5
   4  -9  -4 28.7350 21.9043   3
  -4   9   3 69.5411 44.5990   5
   4  -9  -3 19.9460 8.91135   3
   4  -9  -2-9.19277 8.21823   3
  -4   9   2 18.8233 35.8829   5
  -4   9   2-0.83083 61.2584   4
   4  -9  -1 278.717 50.2124   3
  -4   9   1 303.705 86.9692   5
  -4   9   1 370.435 221.846   4
   4  -9   0 366.195 48.4751   3
  -4   9   0 334.856 90.2397   5
  -4   9   0 51.8362 75.6172   4
   4  -9   1 357.348 33.6219   3
  -4   9  -1 412.284 215.366   4
  -4   9  -2 310.427 129.139   6
  -4   9  -2 296.825 180.994   4
  -4   9  -3 111.535 75.2468   6
  -4   9  -4 1141.07 241.118   6
  -4   9  -5-57.5491 57.5306   6
  -4   9  -6 5.82177 43.0690   6
  -4   9  -7 20.6698 56.1044   6
  -4   9  -8-55.1857 53.4304   6
  -4   9  -9 43.1247 50.6817   6
   4  -8 -13-45.7159 54.3748   2
   4  -8 -12 363.242 106.422   1
   4  -8 -12 535.419 154.863   2
   4  -8 -11 287.239 102.352   2
   4  -8 -11 212.229 76.3850   1
   4  -8 -10-27.8899 38.9289   1
   4  -8 -10 27.6947 41.4300   2
   4  -8  -9 43.3882 19.7952   1
   4  -8  -9 34.1723 45.8093   2
   4  -8  -8 68.7423 34.2789   1
   4  -8  -8 116.617 57.2065   2
   4  -8  -7 5107.33 413.991   2
   4  -8  -7 4850.94 341.873   1
   4  -8  -6 78.1802 38.7926   3
   4  -8  -6 230.012 105.840   2
   4  -8  -6 129.687 55.5691   1
   4  -8  -5 533.472 124.847   1
   4  -8  -5 767.596 111.288   3
  -4   8   5 825.638 310.246   4
   4  -8  -4 1201.14 130.409   3
  -4   8   4 1188.57 363.725   4
  -4   8   3 655.783 133.698   5
  -4   8   3 517.243 251.438   4
   4  -8  -3 589.184 84.5597   3
   4  -8  -2 590.004 77.1270   3
  -4   8   2 506.113 114.321   5
  -4   8   2 815.453 322.979   4
   4  -8  -1 308.473 49.4585   3
  -4   8   1 302.951 91.1949   5
  -4   8   1 298.187 183.213   4
   4  -8   0 71.2324 20.2161   3
  -4   8   0 149.178 59.9119   5
  -4   8   0 131.648 140.802   4
   4  -8   1 1772.68 70.7991   3
  -4   8  -1 1370.55 361.751   4
  -4   8  -2 1463.98 400.009   4
  -4   8  -3 2148.32 322.320   6
  -4   8  -3 2147.64 527.623   4
  -4   8  -4 1381.26 260.331   6
  -4   8  -5 80.9550 76.0146   6
  -4   8  -6 17.1997 32.5124   6
  -4   8  -7 95.3695 66.5965   6
  -4   8  -8 279.551 113.530   6
  -4   8  -9 57.6592 69.5636   6
  -4   8 -10-10.2924 61.5344   6
   4  -7 -14 184.113 102.336   2
   4  -7 -13 3.82802 25.0414   2
   4  -7 -12 55.1231 54.3707   2
   4  -7 -11-60.1639 51.9624   2
   4  -7 -11 28.2195 37.9359   1
   4  -7 -10 221.318 71.4275   1
   4  -7 -10 157.960 74.7407   2
   4  -7  -9 637.006 122.517   1
   4  -7  -9 579.114 146.965   2
   4  -7  -8 167.929 61.9366   1
   4  -7  -8 252.726 95.1506   2
   4  -7  -7 706.674 127.860   1
   4  -7  -7 704.990 150.041   2
   4  -7  -6 4341.24 361.566   2
   4  -7  -6 4555.94 322.362   1
   4  -7  -6 4574.30 288.275   3
   4  -7  -5-43.8934 71.7628   2
   4  -7  -5-9.37738 29.4682   1
   4  -7  -5-17.7429 13.1435   3
   4  -7  -4 316.558 64.7203   3
  -4   7   4 469.877 232.104   4
   4  -7  -3 98.4626 29.2057   3
  -4   7   3 248.745 164.478   4
   4  -7  -2 192.301 42.1688   3
  -4   7   2 270.914 171.259   4
  -4   7   2 191.717 66.4574   5
   4  -7  -1 402.290 54.9207   3
  -4   7   1 434.364 92.2079   5
  -4   7   1 534.317 237.831   4
   4  -7   0 1167.92 78.4330   3
  -4   7   0 1254.67 146.694   5
  -4   7   0 855.151 286.314   4
  -4   7  -1 295.793 191.153   4
  -4   7  -2 30.3240 76.7427   4
  -4   7  -3 72.0564 58.5471   6
  -4   7  -3 234.889 166.691   4
  -4   7  -4 3790.36 405.355   6
  -4   7  -5 37.6289 42.9788   6
   4  -7   5 16.2126 27.8338   5
  -4   7  -6 42.3414 55.6390   6
   4  -7   6-64.4798 49.8578   5
  -4   7  -7 38.9148 42.7944   6
   4  -7   7 67.5715 37.8511   5
  -4   7  -8-4.85807 55.7449   6
  -4   7  -9-55.9871 39.5026   6
  -4   7 -10 96.2392 74.6505   6
  -4   7 -11 123.380 76.0025   6
   4  -6 -14 381.867 135.410   2
   4  -6 -13-7.68166 40.3678   2
   4  -6 -12-28.0540 38.9840   2
   4  -6 -11 82.6482 46.7211   1
   4  -6 -11 56.1495 55.7389   2
   4  -6 -10 91.8018 63.0489   2
   4  -6 -10 118.735 51.3069   1
   4  -6  -9 0.93186 26.9972   1
   4  -6  -9-69.6102 58.6837   2
   4  -6  -8 405.645 90.2629   1
   4  -6  -8 543.328 130.850   2
   4  -6  -7 78.5383 36.7395   3
   4  -6  -7 149.807 56.9872   1
   4  -6  -7 131.635 69.4348   2
   4  -6  -6 734.856 113.108   3
   4  -6  -6 612.763 115.855   1
   4  -6  -6 617.262 128.693   2
   4  -6  -5 231.875 74.1207   2
   4  -6  -5 396.590 92.3746   1
   4  -6  -5 316.231 71.5216   3
   4  -6  -4 74.4713 32.4082   3
   4  -6  -4 132.565 57.5446   2
   4  -6  -4 95.9531 46.5855   1
   4  -6  -3 276.927 58.8203   3
  -4   6   3 281.097 170.127   4
  -4   6   2 777.527 142.233   2
   4  -6  -2 660.166 77.5820   3
  -4   6   2 584.628 249.244   4
   4  -6  -1 1038.82 86.4174   3
  -4   6   1 1074.06 170.887   2
  -4   6   1 1117.42 132.858   5
  -4   6   1 1160.59 330.499   4
   4  -6   0 1484.83 87.5620   3
  -4   6   0 1569.32 212.640   2
  -4   6   0 1536.03 141.455   5
  -4   6   0 1250.87 332.730   4
  -4   6  -1 260.767 94.6260   2
  -4   6  -1 7.13992 95.5276   4
  -4   6  -2 1183.06 306.494   4
  -4   6  -3 277.203 100.232   6
  -4   6  -3 469.523 247.031   4
  -4   6  -4-93.1095 84.0709   6
  -4   6  -5 53.4347 54.7074   6
   4  -6   5 109.376 62.0248   5
  -4   6  -6 22.1897 48.2651   6
   4  -6   6 70.1948 50.6493   5
  -4   6  -7-29.8361 46.4725   6
   4  -6   7 14.9905 29.2208   5
  -4   6  -8 389.327 125.636   6
   4  -6   8 112.638 72.8360   5
  -4   6  -9-25.2061 47.0698   6
   4  -6   9 15.9356 30.2873   5
  -4   6 -10 36.2547 34.2817   6
  -4   6 -11 52.2228 61.2653   6
  -4   6 -12-30.5901 43.8131   6
  -4   6 -13-58.9345 48.4848   2
   4  -5 -15 21.2857 50.8688   2
   4  -5 -14 348.432 127.307   2
   4  -5 -13 75.2051 54.9192   2
   4  -5 -12 87.1674 55.8478   2
   4  -5 -11 501.037 140.613   2
   4  -5 -10-49.3405 47.5626   2
   4  -5 -10-10.8863 24.2568   1
   4  -5  -9 51.4955 52.0683   2
   4  -5  -9-18.7602 27.3741   1
   4  -5  -8 954.563 142.300   1
   4  -5  -8 1046.06 172.581   2
   4  -5  -7 3092.02 248.875   3
   4  -5  -7 3413.26 303.281   2
   4  -5  -7 2967.97 249.219   1
   4  -5  -6-16.4775 17.9539   3
   4  -5  -6-6.41103 21.5591   2
   4  -5  -6 3.95716 28.1895   1
   4  -5  -5 209.717 56.5769   3
  -4   5   5 216.459 68.5042   2
   4  -5  -5 167.905 61.7490   1
   4  -5  -5 119.041 56.9590   2
   4  -5  -4 1415.67 133.854   3
   4  -5  -4 1498.26 190.071   2
   4  -5  -4 1223.30 154.296   1
  -4   5   4 1258.02 168.334   2
   4  -5  -3 442.636 71.0953   3
  -4   5   3 407.102 98.0536   2
  -4   5   3 765.705 261.713   4
   4  -5  -2 16.4873 11.6385   3
  -4   5   2 26.4987 28.0925   2
   4  -5  -1 1265.50 96.8002   3
  -4   5   1 1230.99 123.216   5
  -4   5   1 1265.53 331.512   4
  -4   5   1 1316.18 180.361   2
   4  -5   0 2494.85 116.018   3
  -4   5   0 2765.46 271.397   2
  -4   5   0 2694.10 153.803   5
  -4   5   0 2268.22 419.891   4
  -4   5  -1 1108.91 178.962   2
  -4   5  -1 492.346 193.385   4
   4  -5   2 402.160 173.719   4
  -4   5  -2 424.435 170.681   4
  -4   5  -3-1.89554 41.9201   6
   4  -5   3 189.050 172.642   4
  -4   5  -3-116.128 149.843   4
   4  -5   4 6241.00 332.567   5
  -4   5  -4 6326.02 467.741   6
   4  -5   4 7232.99 869.664   4
  -4   5  -5 5380.24 425.548   6
   4  -5   5 5201.27 333.988   5
  -4   5  -6 5339.62 422.886   6
   4  -5   6 4828.31 351.104   5
  -4   5  -7 186.848 71.5719   6
   4  -5   7 250.164 88.9786   5
  -4   5  -8 12.9286 29.1980   6
   4  -5   8-51.5350 45.7735   5
  -4   5  -9-50.3533 47.2955   6
   4  -5   9-8.05700 25.3928   5
  -4   5 -10-29.1932 23.8134   6
   4  -5  10 13.2405 30.5484   5
  -4   5 -11 114.788 76.6358   6
  -4   5 -12-20.0613 41.3449   6
  -4   5 -13 18.5422 68.3885   6
  -4   5 -13 36.0959 38.1430   2
  -4   5 -14 20.7864 41.8889   2
   4  -4 -15 26.5288 68.0605   2
   4  -4 -14-25.6381 39.7132   2
   4  -4 -13 42.1885 38.3578   2
   4  -4 -12 22.5082 25.3658   2
   4  -4 -11 424.087 119.217   2
   4  -4 -10 39.5742 39.2483   2
   4  -4  -9 34.9968 36.8949   1
   4  -4  -9 33.7777 28.3917   2
   4  -4  -8 3120.59 289.018   2
   4  -4  -8 2877.03 241.792   1
   4  -4  -7 1091.08 146.979   3
   4  -4  -7 1050.92 163.995   2
   4  -4  -7 980.432 140.006   1
   4  -4  -6 1370.96 153.567   3
   4  -4  -6 1367.59 163.212   1
  -4   4   6 1367.78 171.701   2
   4  -4  -6 1414.04 181.611   2
   4  -4  -5 107.061 48.3367   3
  -4   4   5 67.3870 39.9628   2
   4  -4  -5 85.9106 43.1359   1
   4  -4  -5 66.2002 39.5277   2
  -4   4   4 43.6866 29.0389   2
   4  -4  -4 35.2529 24.9522   3
   4  -4  -4 70.2050 29.6793   1
   4  -4  -4 61.3972 33.2163   2
   4  -4  -3 662.828 87.5132   3
   4  -4  -3 674.252 107.584   1
  -4   4   3 606.466 110.585   2
   4  -4  -2 3838.83 190.686   3
  -4   4   2 3982.52 284.428   2
  -4   4   2 3987.82 546.680   4
   4  -4  -1 2660.39 143.388   3
  -4   4   1 3122.75 493.472   4
  -4   4   1 2978.93 255.146   2
  -4   4   0 612.545 60.2665   5
  -4   4   0 494.101 112.997   2
  -4   4  -1 24.2545 40.4169   2
  -4   4  -1 35.2026 84.6137   4
   4  -4   2 1641.05 371.069   4
  -4   4  -2 1374.75 298.801   4
  -4   4  -3 874.707 161.280   6
   4  -4   3 1011.43 303.138   4
  -4   4  -3 607.783 218.655   4
  -4   4  -4 2198.51 256.774   6
   4  -4   4 2024.95 166.881   5
   4  -4   4 2759.66 509.836   4
  -4   4  -5 1077.11 177.155   6
   4  -4   5 1036.27 134.256   5
   4  -4   5 753.456 254.163   4
  -4   4  -6 29.0265 38.7587   6
   4  -4   6 29.1437 22.0280   5
  -4   4  -7-11.0446 50.4984   6
   4  -4   7 46.3485 20.9986   5
  -4   4  -8 1917.18 244.237   6
   4  -4   8 1758.86 229.938   5
  -4   4  -9 818.718 161.410   6
   4  -4   9 528.891 137.236   5
  -4   4 -10 297.461 100.274   6
   4  -4  10 311.110 112.817   5
  -4   4 -11 107.409 45.4332   6
  -4   4 -12 0.24974 27.4645   6
  -4   4 -13 202.335 97.3507   6
  -4   4 -13 247.213 91.6302   2
  -4   4 -14 5.35908 20.9794   2
  -4   4 -14 77.3316 57.8687   6
   4  -3 -15 44.6821 71.4992   2
   4  -3 -14-79.1473 61.4742   2
   4  -3 -13 135.480 77.1290   2
   4  -3 -12 301.131 105.134   2
   4  -3 -11 99.9832 71.8616   2
   4  -3 -10 349.142 100.653   2
   4  -3  -9 366.251 102.843   2
   4  -3  -8 54.1874 51.7039   2
   4  -3  -8 8.94607 26.4008   1
   4  -3  -7 838.726 130.816   3
   4  -3  -7 921.146 149.302   2
   4  -3  -7 904.185 130.441   1
  -4   3   7 1003.49 144.983   2
  -4   3   6 24.5848 24.2500   2
   4  -3  -6 4.82248 19.9163   1
   4  -3  -6 33.1624 34.3202   2
   4  -3  -6 16.6952 17.3998   3
   4  -3  -5 53.8590 30.4848   3
  -4   3   5 40.7418 31.2982   2
   4  -3  -5 27.2478 33.1194   2
   4  -3  -5 40.9013 33.8864   1
   4  -3  -4 696.432 97.3276   3
   4  -3  -4 776.512 117.348   1
  -4   3   4 694.424 112.681   2
   4  -3  -4 702.258 119.474   2
   4  -3  -3 440.216 72.0914   3
   4  -3  -3 601.793 106.571   2
   4  -3  -3 470.399 91.7670   1
  -4   3   3 502.290 95.3559   2
   4  -3  -2 326.221 58.0511   3
  -4   3   2 373.150 81.7136   2
   4  -3  -1 1719.14 123.444   3
  -4   3   1 1687.18 327.592   4
  -4   3   1 1801.24 183.585   2
  -4   3   0 6649.08 369.765   2
  -4   3   0 6405.13 641.809   4
   4  -3   0 5894.05 202.101   3
  -4   3  -1 3778.54 472.349   4
   4  -3   2 561.362 196.352   4
  -4   3  -2 208.383 111.164   4
  -4   3  -3 678.125 130.212   6
   4  -3   3 862.717 266.540   4
  -4   3  -3 923.093 256.640   4
  -4   3  -4 1938.30 220.777   6
   4  -3   4 1853.28 139.759   5
   4  -3   4 1935.01 398.502   4
   4  -3   5 207.716 53.3125   5
  -4   3  -5 211.408 69.5445   6
   4  -3   5 165.983 114.170   4
  -4   3  -6 1448.77 192.209   6
   4  -3   6 1207.44 150.315   5
   4  -3   6 1097.92 306.848   4
  -4   3  -7 3650.19 311.332   6
   4  -3   7 3134.12 527.475   4
  -4   3  -8 984.449 163.626   6
  -4   3  -8 1023.82 99.5931   3
  -4   3  -9 22.3542 17.1889   3
  -4   3  -9-44.0376 55.9249   6
  -4   3 -10 114.108 43.9041   3
  -4   3 -10 136.995 64.0523   6
  -4   3 -11 366.314 79.8526   3
  -4   3 -11 270.745 89.6221   6
  -4   3 -12 75.1415 54.5835   6
  -4   3 -13 271.357 101.082   6
  -4   3 -13 134.765 72.6414   2
  -4   3 -14 112.098 67.1774   2
  -4   3 -14 63.2328 62.2096   6
  -4   3 -15 120.720 63.3567   6
  -4   3 -15-33.8098 36.9566   2
   4  -2 -15 104.196 68.2825   2
   4  -2 -14 113.644 69.2917   2
   4  -2 -13 213.958 91.6110   2
   4  -2 -12 287.742 101.028   2
   4  -2 -11 198.716 77.7869   2
   4  -2 -10-41.3365 53.1065   2
  -4   2   9 1725.84 203.655   6
   4  -2  -9 1562.02 204.246   2
  -4   2   8 3468.56 269.828   2
   4  -2  -8 3058.23 272.547   2
   4  -2  -7 858.077 133.666   3
   4  -2  -7 833.523 123.406   1
  -4   2   7 982.779 137.054   2
  -4   2   7 954.426 146.189   1
   4  -2  -7 884.194 139.801   2
   4  -2  -6 6.15156 17.2979   1
   4  -2  -6 3.70843 11.5571   3
   4  -2  -6-16.9796 26.5645   2
  -4   2   6 53.0306 44.5911   1
  -4   2   6 16.3624 11.7780   2
   4  -2  -5 2481.50 203.349   3
   4  -2  -5 2325.37 197.541   1
   4  -2  -5 2275.01 210.611   2
  -4   2   5 2283.60 196.916   2
   4  -2  -4 432.287 81.7234   3
  -4   2   4 460.820 89.5510   2
   4  -2  -4 394.553 83.1053   1
   4  -2  -3 31.8206 31.0115   1
   4  -2  -3-9.66461 18.8371   3
  -4   2   3 6.85252 16.8962   2
   4  -2  -2 3137.77 189.487   3
   4  -2  -2 3084.86 216.570   1
  -4   2   2 2942.51 216.133   2
   4  -2  -1 10570.4 324.768   3
  -4   2   1 11120.6 791.572   4
  -4   2   1 10744.3 416.697   2
  -4   2   0 7311.52 191.714   5
  -4   2   0 7775.99 373.194   2
  -4   2   0 7421.13 645.277   4
  -4   2  -1 192.205 129.749   4
  -4   2  -2-51.2092 52.9638   6
   4  -2   2-77.1655 57.5439   4
  -4   2  -2 1.66073 61.2930   4
   4  -2   3 2114.92 380.236   4
  -4   2  -3 1754.45 193.809   6
  -4   2  -3 1707.63 327.023   4
  -4   2  -4 8718.35 428.044   6
   4  -2   4 8423.00 264.871   5
   4  -2   4 8721.24 776.772   4
  -4   2  -5 3843.45 97.9938   3
  -4   2  -5 3734.56 281.616   6
   4  -2   5 3512.70 497.964   4
  -4   2  -6 218.250 69.0898   6
  -4   2  -6 219.743 31.2691   3
   4  -2   6 151.333 107.833   4
  -4   2  -7 50.1444 18.4584   3
  -4   2  -7 46.9579 47.4146   6
   4  -2   7 32.2603 38.4085   6
   4  -2   7-42.7707 44.8357   4
  -4   2  -8-5.14655 34.9616   6
   4  -2   8-24.1233 30.9137   6
  -4   2  -9 273.879 56.0687   3
  -4   2  -9 271.357 87.2494   6
  -4   2 -10 164.409 62.0685   6
  -4   2 -10 203.563 53.8315   3
  -4   2 -11 370.308 79.5184   3
  -4   2 -11 304.646 91.0808   6
  -4   2 -12 41.2485 29.6181   3
  -4   2 -12 21.0974 23.0485   2
  -4   2 -12 25.8746 36.3044   6
  -4   2 -13 456.143 123.925   6
  -4   2 -13 340.039 97.8448   2
  -4   2 -14 215.084 91.5050   2
  -4   2 -14 213.919 100.303   6
  -4   2 -15 46.3939 41.9088   6
  -4   2 -15 54.0716 55.5947   2
   4  -1 -16 102.472 74.9698   2
   4  -1 -15 164.994 95.0240   2
   4  -1 -14 260.027 108.493   2
   4  -1 -13 204.285 92.0654   2
   4  -1 -12 768.744 165.553   2
   4  -1 -11 802.668 156.243   2
   4  -1 -10 27.5886 22.9722   2
  -4   1   9 735.695 129.359   6
   4  -1  -9 531.553 114.630   2
  -4   1   8 6026.66 351.836   6
  -4   1   8 6268.43 345.588   2
   4  -1  -8 5624.86 356.065   2
   4  -1  -7 905.502 141.016   3
  -4   1   7 961.710 130.820   2
  -4   1   7 1101.12 163.353   1
  -4   1   7 963.800 133.018   6
   4  -1  -7 822.899 128.925   2
   4  -1  -6 748.923 120.184   3
   4  -1  -6 743.327 114.422   1
  -4   1   6 694.310 119.756   1
  -4   1   6 666.674 105.521   2
   4  -1  -6 588.403 108.479   2
   4  -1  -5 48.8006 34.3568   1
  -4   1   5 104.838 40.7506   2
  -4   1   5 88.8559 42.5802   1
  -4   1   5 65.1019 36.9547   3
   4  -1  -5 86.0633 41.0614   3
   4  -1  -4 142.678 46.2982   3
  -4   1   4 110.022 42.7673   2
  -4   1   4 196.276 52.9021   3
   4  -1  -4 105.938 39.1426   1
   4  -1  -3 3050.22 211.504   3
   4  -1  -3 3035.18 213.302   1
  -4   1   3 3109.85 184.836   3
  -4   1   3 3113.64 210.555   2
  -4   1   2 5087.02 218.047   3
   4  -1  -2 4549.08 256.303   1
   4  -1  -2 4589.52 258.637   2
  -4   1   2 4664.59 250.846   2
   4  -1  -2 4975.59 253.273   3
  -4   1   1 670.979 73.2187   3
  -4   1   1 704.657 90.5036   5
   4  -1  -1 747.012 102.694   1
  -4   1   1 628.039 92.9723   2
  -4   1   0 831.747 72.6930   3
  -4   1   0 944.022 117.548   2
  -4   1   0 872.244 88.1969   5
  -4   1   0 1197.25 243.847   4
  -4   1  -1 1872.07 97.6270   3
  -4   1  -1 1824.69 281.305   4
  -4   1  -2 5884.34 157.853   3
  -4   1  -2 6079.70 318.365   6
   4  -1   2 6204.22 552.607   4
  -4   1  -2 5483.86 470.764   4
   4  -1   3 8974.85 710.419   4
  -4   1  -3 9568.02 718.268   4
  -4   1  -3 8726.78 384.207   6
   4  -1   4 4278.87 505.790   4
  -4   1  -4 4179.20 264.995   6
  -4   1  -5 8261.33 385.765   6
   4  -1   5 8576.13 716.718   4
  -4   1  -6 3623.53 263.398   6
   4  -1   6 3759.56 325.836   6
   4  -1   6 3694.40 517.336   4
  -4   1  -7 3131.04 150.383   3
  -4   1  -7 3052.00 246.443   6
   4  -1   7 2970.77 504.295   4
   4  -1   7 3239.23 314.810   6
  -4   1  -8 847.598 86.8512   3
   4  -1   8 832.370 168.831   6
  -4   1  -8 898.937 140.588   6
  -4   1  -9 131.969 36.8976   3
  -4   1  -9 113.954 44.9047   6
  -4   1 -10 2135.14 167.385   3
  -4   1 -10 2149.46 230.613   6
  -4   1 -11 1903.22 172.990   3
  -4   1 -11 2207.55 243.727   6
  -4   1 -11 2064.23 224.774   2
  -4   1 -12 202.765 58.8137   3
  -4   1 -12 257.496 87.2014   6
  -4   1 -12 269.002 73.2759   2
  -4   1 -13-31.2561 43.2087   6
  -4   1 -13-3.30190 18.1997   2
  -4   1 -14 29.1379 26.2588   6
  -4   1 -14 6.88659 21.1675   2
  -4   1 -15-9.95552 60.5303   6
  -4   1 -15 45.6760 28.8398   2
  -4   1 -16 42.9262 53.2057   6
  -4   1 -16 10.9111 22.4625   2
   4   0 -16 73.6442 59.8588   2
   4   0 -15 110.591 69.5910   2
   4   0 -14 257.726 104.677   2
   4   0 -13 181.597 81.4021   2
   4   0 -12-25.5975 38.6670   2
   4   0 -11 85.4337 42.7800   2
   4   0 -10 43.4600 38.2279   2
   4   0  -9-11.0050 32.6607   2
  -4   0   9 38.1670 19.9878   6
  -4   0   9-15.2952 20.4138   2
  -4   0   8 790.403 116.973   2
  -4   0   8 878.685 130.959   6
   4   0  -8 827.042 135.908   2
  -4   0   7 326.220 79.6855   3
  -4   0   7 294.894 87.0893   1
   4   0  -7 237.131 72.1648   3
  -4   0   7 341.999 75.9260   6
   4   0  -7 268.441 73.3476   2
  -4   0   7 327.635 72.9986   2
  -4   0   6-1.00425 21.1532   6
  -4   0   6 7.56111 18.7832   3
  -4   0   6-7.39194 14.2072   2
  -4   0   6-13.9821 24.8431   1
   4   0  -6-15.8823 22.5221   3
   4   0  -5 5705.29 333.669   3
  -4   0   5 5452.16 283.912   3
   4   0  -5 5520.15 287.768   1
  -4   0   5 5877.66 273.237   6
  -4   0   5 5615.59 280.858   2
   4   0  -4 1540.73 164.746   3
  -4   0   4 1608.25 146.584   3
   4   0  -4 1627.52 153.037   2
   4   0  -4 1580.30 153.169   1
  -4   0   4 1733.69 148.389   2
   4   0  -3 355.015 77.4647   3
  -4   0   3 391.341 69.7089   3
   4   0  -3 335.581 68.2914   1
  -4   0   3 402.590 70.6027   2
   4   0  -3 344.354 69.5599   2
  -4   0   2 9375.45 310.691   3
   4   0  -2 9122.40 346.792   1
  -4   0   2 8822.83 389.259   5
   4   0  -2 9427.75 342.881   2
  -4   0   2 8744.61 318.856   2
  -4   0   1 300.034 52.8974   3
   4   0  -1 254.566 58.9231   1
  -4   0   1 211.206 47.2878   2
  -4   0   1 220.308 57.2335   5
  -4   0   0 1164.14 96.9748   3
  -4   0   0 1188.89 119.371   2
  -4   0   0 1074.64 115.732   5
   4   0   0 1220.94 125.543   1
  -4   0   0 1402.32 229.753   4
  -4   0  -1 3080.96 167.665   5
  -4   0  -1 3249.67 343.397   4
  -4   0  -1 3119.23 156.567   3
  -4   0  -2 12164.0 391.420   6
   4   0   2 11746.9 297.130   5
   4   0   2 12486.3 698.780   4
  -4   0  -2 10388.4 597.078   4
  -4   0  -3 20183.2 504.703   6
   4   0   3 19663.4 945.542   4
   4   0   4 13123.1 507.496   6
  -4   0  -4 13425.9 424.745   6
   4   0   4 13117.8 794.588   4
   4   0   5 5332.43 338.387   6
   4   0   5 5566.70 566.698   4
  -4   0  -5 5469.82 284.650   6
   4   0   6 9352.28 465.764   6
  -4   0  -6 9357.68 384.479   6
   4   0   6 9470.98 804.034   4
   4   0   7 33.1803 32.5678   6
  -4   0  -7-1.54510 25.8291   6
   4   0   8 998.409 169.854   6
  -4   0  -8 930.973 133.283   6
   4   0   9 90.7172 57.6535   6
  -4   0  -9 103.087 46.8924   6
  -4   0  -9 89.2985 33.4322   3
  -4   0 -10 97.6022 42.7394   6
  -4   0 -10 170.761 45.3933   3
  -4   0 -11 86.6089 44.7805   2
  -4   0 -11 107.488 38.3945   3
  -4   0 -11 109.780 47.8428   6
  -4   0 -12 6917.92 347.566   3
  -4   0 -12 7502.27 456.211   6
  -4   0 -12 7825.04 442.647   2
  -4   0 -13 104.381 48.5322   3
  -4   0 -13 66.2384 40.6135   2
  -4   0 -13 173.504 77.1995   6
  -4   0 -14 91.9262 60.4289   6
  -4   0 -14 12.0893 22.2502   2
  -4   0 -15 73.8451 52.5470   6
  -4   0 -15 110.702 52.4553   2
  -4   0 -16 273.069 110.442   6
  -4   0 -16 167.697 72.8219   2
   4   1 -16 209.161 94.1161   2
   4   1 -15 15.6574 26.8923   2
   4   1 -14 78.9548 48.0798   2
   4   1 -13 218.092 84.3209   2
   4   1 -12 101.712 52.0738   2
   4   1 -11 140.029 69.3321   2
   4   1 -10 2407.61 246.210   2
  -4  -1   9 283.955 80.0145   6
  -4  -1   9 368.155 98.0289   3
   4   1  -9 206.036 64.4496   2
  -4  -1   9 254.041 71.9979   2
  -4  -1   8 447.542 95.4551   6
  -4  -1   8 402.427 96.5712   3
   4   1  -8 420.267 91.4581   2
  -4  -1   8 427.238 84.4702   2
  -4  -1   7 513.127 91.3498   6
  -4  -1   7 442.612 91.4463   3
  -4  -1   7 575.547 92.8155   2
   4   1  -7 423.432 87.4877   2
  -4  -1   7 452.776 104.158   1
   4   1  -6 386.133 95.1226   3
  -4  -1   6 433.913 83.7942   3
  -4  -1   6 395.924 72.1057   2
  -4  -1   6 426.352 77.1665   6
  -4  -1   6 356.559 92.0322   1
  -4  -1   5 146.249 49.1072   3
  -4  -1   5 119.217 36.8931   6
   4   1  -5 86.7882 44.6540   2
   4   1  -5 108.913 46.8712   3
  -4  -1   5 118.249 41.2494   2
   4   1  -4 2978.14 196.855   2
  -4  -1   4 2599.40 265.269   5
   4   1  -4 2450.58 183.473   1
  -4  -1   4 2756.96 175.624   2
  -4  -1   4 2767.13 161.762   6
   4   1  -4 2716.41 227.283   3
  -4  -1   3 4341.41 237.495   3
   4   1  -3 4678.86 246.701   1
  -4  -1   3 3982.94 305.969   5
  -4  -1   3 4491.90 214.058   2
   4   1  -3 4767.15 238.272   2
  -4  -1   2 5070.42 248.687   3
   4   1  -2 5047.79 251.379   1
   4   1  -2 4881.09 229.909   2
  -4  -1   2 4813.18 315.739   5
  -4  -1   2 4736.88 216.810   2
  -4  -1   1 2084.33 154.044   3
  -4  -1   1 2124.23 203.469   5
   4   1  -1 1909.34 152.692   1
  -4  -1   1 1908.18 134.057   2
  -4  -1   0 11190.0 433.555   5
   4   1   0 11395.2 358.801   1
  -4  -1   0 11850.4 591.453   4
  -4  -1   0 10249.9 313.610   2
  -4  -1   0 11395.9 356.010   3
  -4  -1  -1 58554.8 670.167   6
  -4  -1  -1 56791.9 895.991   5
   4   1   1 59927.1 867.025   5
   4   1   1 57586.7 785.793   1
  -4  -1  -1 57816.5 1275.36   4
  -4  -1  -2 593.422 67.6313   6
   4   1   2 473.043 82.4031   5
   4   1   2 466.497 118.684   4
  -4  -1  -2 478.720 112.347   4
   4   1   3 5221.52 264.911   6
  -4  -1  -3 5878.07 229.124   6
   4   1   3 5763.64 276.217   5
   4   1   3 5799.95 459.672   4
   4   1   4 1076.67 128.394   6
  -4  -1  -4 1226.87 113.738   6
   4   1   4 1177.06 220.936   4
   4   1   5 6693.42 334.824   6
  -4  -1  -5 7365.47 295.542   6
   4   1   5 7594.02 631.181   4
   4   1   6 4242.63 282.289   6
  -4  -1  -6 4681.72 252.824   6
  -4  -1  -7 1617.71 157.975   6
   4   1   7 1522.78 180.594   6
   4   1   8 409.474 97.7171   6
  -4  -1  -8 382.606 82.0388   6
   4   1   9 253.479 86.1846   6
  -4  -1  -9 303.203 79.4846   6
   4   1  10 1172.70 185.572   6
  -4  -1 -10 1008.98 140.514   2
  -4  -1 -10 1117.19 152.939   6
  -4  -1 -11 2507.27 248.441   6
  -4  -1 -11 2252.18 191.710   3
  -4  -1 -11 2496.68 232.951   2
  -4  -1 -12 3325.04 296.859   6
  -4  -1 -12 3299.43 276.918   2
  -4  -1 -12 2723.17 220.439   3
  -4  -1 -13 3799.67 332.382   6
  -4  -1 -13 3893.89 312.395   2
  -4  -1 -14 41.9054 48.9415   6
  -4  -1 -14-33.0630 44.5504   2
  -4  -1 -15 52.9347 36.6202   2
  -4  -1 -16 12.2834 27.4671   2
  -4  -1 -17 65.8635 41.0170   2
   4   2 -16 12.7934 25.3095   2
   4   2 -15 73.2471 72.2961   2
   4   2 -14 104.665 68.6188   2
   4   2 -13 186.215 76.9020   2
   4   2 -12 14.1575 34.6772   2
   4   2 -11-29.3757 34.0408   2
   4   2 -10 139.385 57.8043   2
  -4  -2  10 121.682 62.0437   3
  -4  -2   9 9536.25 474.265   3
  -4  -2   9 8928.59 475.449   6
  -4  -2   9 8717.53 397.084   2
   4   2  -9 8912.60 434.973   2
  -4  -2   8 487.932 102.696   6
  -4  -2   8 582.297 114.208   3
   4   2  -8 531.909 102.205   2
  -4  -2   8 503.059 88.5219   2
  -4  -2   7 769.262 116.483   6
  -4  -2   7 818.585 105.853   2
  -4  -2   7 762.594 178.674   5
  -4  -2   7 739.186 117.314   3
  -4  -2   6 2463.75 206.754   3
  -4  -2   6 2455.38 189.157   6
  -4  -2   6 2332.52 298.551   5
  -4  -2   6 2456.75 170.215   2
  -4  -2   6 2409.26 226.945   1
  -4  -2   5 669.383 89.4448   6
  -4  -2   5 637.083 81.1253   2
  -4  -2   5 702.607 150.155   5
   4   2  -5 620.571 92.3838   2
  -4  -2   4 1189.87 104.301   6
  -4  -2   4 1253.66 107.585   2
  -4  -2   4 1083.24 179.991   5
   4   2  -4 1060.71 113.698   2
   4   2  -3 6877.30 266.944   2
  -4  -2   3 7146.51 220.433   6
  -4  -2   3 6513.56 419.522   5
  -4  -2   3 7099.35 244.353   2
  -4  -2   2 2979.17 119.410   6
   4   2  -2 3215.73 194.353   1
   4   2  -2 2975.21 166.898   2
  -4  -2   2 3068.60 280.093   5
  -4  -2   2 3010.13 152.461   2
  -4  -2   1 3939.51 103.738   6
  -4  -2   1 4091.90 312.315   5
  -4  -2   1 3961.77 171.394   2
   4   2  -1 3750.91 204.326   1
  -4  -2   1 4186.09 246.655   3
   4   2   0 5396.76 311.370   5
   4   2   0 5689.09 241.319   1
  -4  -2   0 5819.40 350.268   5
  -4  -2   0 5599.16 245.317   1
  -4  -2   0 5140.53 192.120   2
  -4  -2  -1 930.747 49.1150   6
   4   2   1 823.665 90.3016   1
  -4  -2  -1 778.913 121.044   5
   4   2   1 874.174 121.876   5
  -4  -2  -1 790.856 117.979   4
  -4  -2  -2 18.9940 7.13662   6
   4   2   2-2.34737 17.6001   1
   4   2   2-4.34960 32.8060   5
   4   2   2 8.10537 27.5429   4
  -4  -2  -2-16.3592 37.4006   4
  -4  -2  -3 13490.8 285.436   6
   4   2   3 12803.5 345.572   6
   4   2   3 13195.2 480.688   5
   4   2   3 12400.9 575.097   4
   4   2   4 3735.52 202.419   6
  -4  -2  -4 3841.87 174.633   6
   4   2   4 4490.62 403.947   4
  -4  -2  -5 9176.25 303.031   6
   4   2   5 8977.30 343.574   6
   4   2   6 1620.13 157.417   6
  -4  -2  -6 1627.92 138.520   6
   4   2   7 49.7582 22.6637   6
  -4  -2  -7 41.9492 26.4266   6
  -4  -2  -8 331.512 73.2540   6
  -4  -2  -8 336.890 70.9090   2
   4   2   8 343.117 85.6502   6
  -4  -2  -9 392.681 86.1799   6
  -4  -2  -9 412.063 81.5712   2
   4   2   9 473.199 105.529   6
   4   2  10 1283.95 187.380   6
  -4  -2 -10 1250.17 164.326   6
  -4  -2 -10 1169.93 144.869   2
  -4  -2 -11 1156.36 166.504   6
  -4  -2 -11 1168.12 151.360   2
  -4  -2 -12 1103.48 167.686   6
  -4  -2 -12 1028.88 156.283   2
  -4  -2 -13 189.511 63.5140   2
  -4  -2 -14 171.581 68.5334   2
  -4  -2 -15 96.3417 56.5734   2
  -4  -2 -16 53.9308 57.6757   2
  -4  -2 -17-4.35718 22.0808   2
   4   3 -15-29.1331 37.1959   2
   4   3 -14-36.9554 36.7077   2
   4   3 -13-28.5927 31.9750   2
   4   3 -12-21.4565 32.6859   2
   4   3 -11 32.3310 33.4453   2
   4   3 -10-29.3425 42.5073   2
  -4  -3  10-7.27564 29.0540   3
  -4  -3   9 379.588 101.573   6
   4   3  -9 433.773 93.7749   2
  -4  -3   9 455.605 107.309   3
   4   3  -8 18.5543 19.3161   2
  -4  -3   8-0.46062 41.5160   3
  -4  -3   8 12.0864 13.3055   2
  -4  -3   8 81.9576 45.7843   6
  -4  -3   7 961.259 139.384   6
  -4  -3   7 926.740 110.454   2
  -4  -3   7 833.836 132.596   3
  -4  -3   6 111.213 51.0621   1
  -4  -3   6 152.705 50.6354   6
  -4  -3   6 114.210 36.8354   2
  -4  -3   6 80.5068 63.3315   5
  -4  -3   6 94.6176 49.1919   3
  -4  -3   5 31.8603 25.4935   1
  -4  -3   5 42.3030 27.4325   6
   4   3  -5 95.4751 32.3511   2
  -4  -3   5 42.0982 18.4558   2
  -4  -3   5 101.844 79.8224   5
  -4  -3   4 1097.55 109.916   6
  -4  -3   4 1069.04 189.740   5
  -4  -3   4 1113.65 92.2423   2
   4   3  -4 1303.24 115.040   2
  -4  -3   3 3395.15 170.269   6
  -4  -3   3 3279.11 323.411   5
  -4  -3   3 3323.18 146.340   2
   4   3  -3 3615.27 178.976   2
  -4  -3   2 6453.79 442.582   5
   4   3  -2 6697.37 220.136   2
  -4  -3   2 6217.09 184.106   2
  -4  -3   2 6334.61 193.718   6
   4   3  -1 4027.58 203.505   1
  -4  -3   1 4082.40 234.404   1
  -4  -3   1 3708.27 322.093   5
   4   3  -1 4451.73 326.938   5
  -4  -3   1 3881.58 139.836   2
   4   3   0 5264.43 224.416   1
  -4  -3   0 4908.01 358.107   5
   4   3   0 4982.84 337.040   5
  -4  -3   0 5070.17 239.085   1
  -4  -3   0 4797.98 155.241   2
   4   3   1 450.086 66.8985   1
  -4  -3  -1 537.262 116.591   5
   4   3   1 463.507 101.997   5
  -4  -3  -1 368.991 64.1190   1
  -4  -3  -1 405.103 63.3645   4
   4   3   2 11896.3 510.726   5
   4   3   2 11493.3 313.972   1
   4   3   2 11767.0 222.070   6
   4   3   3 264.265 41.7189   6
   4   3   3 111.931 46.1781   5
   4   3   3 272.149 50.3276   1
   4   3   3 205.403 60.6233   4
   4   3   4 2107.88 131.391   6
  -4  -3  -5 593.641 72.8486   6
   4   3   5 582.910 79.5857   6
  -4  -3  -6 7282.83 286.681   6
   4   3   6 7244.89 309.265   6
   4   3   7 4267.32 260.218   6
  -4  -3  -7 4392.86 239.773   6
  -4  -3  -7 4543.01 234.595   2
  -4  -3  -8 136.527 51.0471   6
  -4  -3  -8 150.727 45.5765   2
   4   3   8 156.606 55.7277   6
   4   3   9 365.928 89.3425   6
  -4  -3  -9 374.305 88.6303   6
  -4  -3  -9 280.690 66.2570   2
   4   3  10 3504.03 295.676   6
  -4  -3 -10 3477.33 248.382   2
  -4  -3 -11 6696.75 355.212   2
  -4  -3 -12 4985.71 326.443   2
  -4  -3 -13 17.9739 23.9052   2
  -4  -3 -14 45.5110 37.0636   2
  -4  -3 -15 26.2070 26.3963   2
  -4  -3 -16 23.6068 51.2756   2
  -4  -3 -17 7.18068 22.6748   2
   4   4 -14 13.0234 42.7837   2
   4   4 -13 87.4735 51.5028   2
   4   4 -12-37.0088 33.7140   2
   4   4 -11 63.9246 45.9435   2
  -4  -4  11 112.410 58.7760   3
  -4  -4  10 2588.38 269.448   3
   4   4 -10 2237.68 217.258   2
  -4  -4   9 161.030 63.3293   6
  -4  -4   9 79.5888 50.9245   3
   4   4  -9 29.0424 29.2129   2
  -4  -4   8 2042.77 218.558   3
  -4  -4   8 1840.94 228.458   6
   4   4  -8 1937.89 181.561   2
  -4  -4   7 1748.02 197.434   3
  -4  -4   7 1804.32 209.768   6
  -4  -4   6 986.583 144.259   3
  -4  -4   6 1048.90 145.928   6
   4   4  -6 835.584 105.050   2
  -4  -4   5 94.1387 39.2594   6
   4   4  -5 49.0835 28.6966   2
  -4  -4   5 38.1142 27.9836   3
  -4  -4   5 37.7010 64.4694   5
  -4  -4   5 67.5164 41.5414   1
  -4  -4   4 1055.88 134.982   1
  -4  -4   4 1034.73 121.613   6
  -4  -4   4 1010.35 85.9300   2
  -4  -4   4 1107.21 209.036   5
   4   4  -4 1021.62 96.1125   2
  -4  -4   3 2131.95 158.779   6
  -4  -4   3 2067.99 183.078   1
  -4  -4   3 2025.76 104.381   2
  -4  -4   3 2262.53 290.102   5
   4   4  -3 2143.60 124.028   6
   4   4  -3 2073.26 122.732   2
  -4  -4   2 777.014 110.817   1
  -4  -4   2 941.503 185.634   5
  -4  -4   2 724.952 53.4956   2
   4   4  -2 795.040 63.7308   6
   4   4  -2 885.624 69.7807   2
  -4  -4   1 639.380 91.0262   1
  -4  -4   1 561.627 38.0446   2
  -4  -4   1 587.844 135.983   5
  -4  -4   0 1910.30 155.097   1
  -4  -4   0 1999.66 248.033   5
   4   4   0 2213.31 248.446   5
  -4  -4   0 1914.83 64.5683   2
  -4  -4  -1 1893.82 77.8051   2
  -4  -4  -1 2110.23 243.953   5
  -4  -4  -1 1858.19 140.674   1
   4   4   1 1848.07 225.282   5
   4   4   2 14476.4 328.329   1
   4   4   2 15535.6 631.309   5
  -4  -4  -2 15271.4 357.769   1
   4   4   2 15305.5 205.192   6
   4   4   3 10243.4 263.443   1
   4   4   3 9824.46 501.469   5
   4   4   3 9426.31 300.149   4
   4   4   3 10024.0 222.897   6
  -4  -4  -4 3050.85 144.914   2
   4   4   4 3395.02 144.307   1
   4   4   4 2878.06 143.834   6
  -4  -4  -5 2500.21 146.426   2
   4   4   5 2658.56 126.326   1
   4   4   5 2422.51 149.992   6
  -4  -4  -6 1571.79 123.424   2
   4   4   6 1571.51 135.533   6
   4   4   7 5855.14 284.898   6
  -4  -4  -7 5871.11 262.324   2
   4   4   8 10.2471 18.3612   6
  -4  -4  -8 66.1868 30.1331   2
  -4  -4  -9 5354.12 285.737   2
   4   4   9 5506.35 325.703   6
   4   4  10 3702.47 286.631   6
  -4  -4 -10 3608.22 248.811   2
  -4  -4 -11 3066.27 244.731   2
  -4  -4 -12 57.2616 38.3520   2
  -4  -4 -13 2633.69 247.743   2
  -4  -4 -14 124.720 58.2002   2
  -4  -4 -15 17.2278 23.4830   2
  -4  -4 -16-5.63307 19.6641   2
  -4  -4 -17 74.0112 52.4431   2
   4   5 -13 26.1584 28.7482   2
   4   5 -12 72.7565 50.0303   2
  -4  -5  12-12.0523 46.5695   3
   4   5 -11 54.8578 41.6484   2
  -4  -5  11-56.3944 45.8762   3
   4   5 -10 329.153 82.7453   2
  -4  -5  10 369.932 107.801   3
   4   5  -9 425.106 86.8009   2
  -4  -5   9 319.228 92.2120   3
  -4  -5   8 689.841 150.254   6
  -4  -5   8 706.740 130.926   3
   4   5  -8 612.852 100.092   2
  -4  -5   7 854.550 141.795   3
   4   5  -7 825.806 115.733   6
  -4  -5   7 796.533 153.308   6
   4   5  -6 319.624 63.0116   2
  -4  -5   6 336.317 89.1879   3
  -4  -5   6 198.091 71.7267   6
  -4  -5   5 13.3655 27.6519   3
  -4  -5   5 19.9565 18.7114   6
   4   5  -5 8.62569 11.6639   6
   4   5  -5 47.8802 19.1762   2
  -4  -5   5 113.184 66.4743   5
  -4  -5   5 27.2067 31.8768   1
   4   5  -4 70.3264 27.6684   2
   4   5  -4 79.7763 27.8134   6
  -4  -5   4 67.4197 36.1199   6
  -4  -5   4 183.340 99.2307   5
  -4  -5   4 46.2837 40.9267   3
  -4  -5   4 72.5925 30.7542   1
  -4  -5   3 4240.87 254.799   1
   4   5  -3 4419.96 190.914   6
  -4  -5   3 4410.80 430.272   5
   4   5  -3 4600.45 168.437   2
   4   5  -2 1624.19 78.7241   2
   4   5  -2 1576.90 100.446   6
  -4  -5   2 1631.27 154.155   1
  -4  -5   2 1699.55 255.827   5
  -4  -5   1 235.943 93.5189   5
   4   5  -1 192.856 31.5337   6
  -4  -5   1 190.644 51.1710   1
   4   5   0 4389.77 140.881   6
  -4  -5   0 4907.73 247.069   1
  -4  -5   0 4364.81 391.704   5
  -4  -5   0 4187.57 230.758   4
  -4  -5  -1 15441.2 714.135   5
  -4  -5  -1 15066.3 400.676   1
  -4  -5  -2 207.440 22.7433   2
   4   5   2 184.001 68.1748   5
  -4  -5  -2 169.304 36.0509   1
  -4  -5  -3 283.854 47.4233   1
  -4  -5  -3 299.145 35.2914   2
   4   5   3 293.866 102.188   5
   4   5   4 831.426 164.603   5
   4   5   4 847.776 78.0387   6
  -4  -5  -4 894.803 72.4029   2
   4   5   5 8364.27 275.882   6
   4   5   5 8480.40 180.599   1
  -4  -5  -5 8768.38 262.160   2
   4   5   6-0.45857 14.4213   6
   4   5   6-5.44200 10.2967   1
  -4  -5  -6 5.77447 14.8252   2
   4   5   7 1890.16 160.010   6
  -4  -5  -7 1930.69 147.665   2
   4   5   7 2195.81 87.7626   1
  -4  -5  -8 82.2141 39.7737   2
   4   5   8 36.4585 21.6297   6
  -4  -5  -9 3230.32 218.262   2
   4   5   9 3157.80 237.900   6
  -4  -5 -10 1180.25 143.333   2
   4   5  10 1089.54 150.911   6
  -4  -5 -11 25.2803 27.3210   2
  -4  -5 -12 30.0636 25.7816   2
  -4  -5 -13 55.6670 44.4799   2
  -4  -5 -14 40.4508 36.4457   2
  -4  -5 -15 186.204 73.3765   2
  -4  -5 -16-28.6997 35.1544   2
  -4  -5 -17 79.2056 60.1401   2
   4   6 -12 71.7774 43.7327   2
  -4  -6  12 25.4937 49.9992   3
   4   6 -11 71.1270 41.1898   2
  -4  -6  11-30.3289 40.5405   3
   4   6 -10 389.254 89.5727   2
  -4  -6  10 410.398 111.901   3
  -4  -6   9 832.712 154.840   3
   4   6  -9 621.935 119.701   6
   4   6  -9 700.563 112.553   2
  -4  -6   8 608.497 151.480   6
   4   6  -8 694.162 103.388   2
  -4  -6   8 592.077 123.774   3
   4   6  -8 669.104 114.662   6
  -4  -6   7 191.929 56.5122   3
   4   6  -7 147.809 52.7985   6
  -4  -6   7 49.2644 41.9431   6
  -4  -6   6 473.940 120.646   6
  -4  -6   6 543.348 113.833   3
   4   6  -6 567.958 79.3941   2
  -4  -6   5 714.843 137.034   3
   4   6  -5 690.866 80.8791   2
  -4  -6   4 1290.55 182.730   3
  -4  -6   4 1212.68 244.685   5
   4   6  -4 1192.65 118.261   6
   4   6  -4 1199.58 94.6358   2
  -4  -6   4 1021.37 124.086   1
   4   6  -3 5.30102 12.5138   6
   4   6  -3-1.20962 7.00624   2
  -4  -6   3-15.3626 51.3549   5
  -4  -6   3-0.69348 11.4489   1
  -4  -6   3 35.1288 48.9235   3
   4   6  -2 3357.17 177.187   6
  -4  -6   2 3373.72 212.880   1
  -4  -6   2 3528.28 393.208   5
   4   6  -1 177.255 41.1430   6
  -4  -6   1 131.966 80.4191   5
  -4  -6   1 145.327 44.4473   1
  -4  -6   1 251.355 89.6175   4
  -4  -6   0 81.0823 83.9748   5
   4   6   0 47.6651 22.5146   6
  -4  -6   0 26.2127 20.6212   1
  -4  -6   0 52.9353 36.4762   4
  -4  -6  -1 972.515 195.945   5
  -4  -6  -1 1071.69 108.168   1
  -4  -6  -2 2796.29 164.257   1
  -4  -6  -3 906.438 85.1031   1
  -4  -6  -3 943.749 64.9446   2
  -4  -6  -4 6754.15 202.997   2
  -4  -6  -4 6573.19 193.432   1
  -4  -6  -5 8711.80 261.232   2
  -4  -6  -6 3138.46 173.468   2
   4   6   7 11.0064 10.2777   6
  -4  -6  -7-0.54731 15.1185   2
   4   6   8 4102.24 249.381   6
  -4  -6  -8 4353.25 241.580   2
   4   6   9 1723.32 174.965   6
  -4  -6  -9 1709.86 161.883   2
   4   6  10 4153.95 290.495   6
   4   6  10 4099.36 116.239   1
  -4  -6 -10 3947.78 261.749   2
   4   6  11 2593.75 117.514   1
  -4  -6 -11 2648.65 226.056   2
   4   6  12 1046.16 87.4771   1
  -4  -6 -12 1087.67 154.889   2
   4   6  13 9.05814 11.1484   1
  -4  -6 -13-10.2179 36.3597   2
   4   6  14-22.5923 21.2798   1
  -4  -6 -14-21.4181 32.4933   2
  -4  -6 -15 12.3679 47.9730   2
  -4  -6 -16 13.3643 22.9847   2
  -4  -6 -17 35.7860 40.2498   2
  -4  -7  12-26.0088 36.4182   3
  -4  -7  11 250.807 97.1160   3
   4   7 -10 31.6709 30.2088   2
  -4  -7  10-37.4357 37.4529   3
   4   7 -10-37.9563 33.9599   6
   4   7  -9 78.6901 39.0477   2
  -4  -7   9 43.5663 53.2566   3
   4   7  -9 24.0047 26.5225   6
   4   7  -8 297.362 67.0930   2
  -4  -7   8 219.020 80.0584   3
   4   7  -8 212.351 68.4367   6
  -4  -7   7 39.5672 42.0897   3
   4   7  -7 14.9617 14.7315   6
   4   7  -6 395.921 81.0238   6
   4   7  -6 579.626 79.4518   2
  -4  -7   6 624.593 130.102   3
   4   7  -5 22.4286 16.3637   2
  -4  -7   5-31.9068 36.9283   3
   4   7  -4 20.2642 15.6460   2
  -4  -7   4-3.72313 25.6761   3
  -4  -7   3 597.794 130.156   3
   4   7  -3 524.987 84.3347   6
  -4  -7   3 204.917 107.805   5
   4   7  -3 540.558 50.1197   2
  -4  -7   3 385.863 149.682   4
   4   7  -2 420.419 73.0258   6
  -4  -7   2 429.160 146.970   5
   4   7  -2 448.501 141.579   5
  -4  -7   2 345.629 124.851   4
   4   7  -1 34.8516 15.4056   6
  -4  -7   1 71.5190 73.9697   5
  -4  -7   1 44.3235 33.8923   4
   4   7   0-11.0744 22.4278   6
  -4  -7   0 12.7487 39.8017   5
  -4  -7   0-34.1462 47.2733   4
  -4  -7  -1 1592.88 260.154   5
  -4  -7  -1 1381.21 122.331   1
  -4  -7  -2 137.677 36.7672   1
   4   7   3 1108.19 126.699   4
  -4  -7  -3 1286.51 105.202   1
  -4  -7  -3 1337.10 87.2616   2
  -4  -7  -4 461.348 53.2577   1
  -4  -7  -4 412.810 54.6993   2
   4   7   4 401.644 85.4944   4
  -4  -7  -5 601.082 70.6553   2
  -4  -7  -6 652.456 80.8230   2
  -4  -7  -7-17.0848 24.7885   2
   4   7   8 1895.44 174.894   6
  -4  -7  -8 1923.63 164.637   2
  -4  -7  -9 2972.46 215.161   2
   4   7   9 2826.97 226.092   6
   4   7  10 637.350 114.048   6
  -4  -7 -10 515.423 96.0706   2
  -4  -7 -11 692.326 117.781   2
  -4  -7 -12 2491.04 233.058   2
   4   7  13 7.60400 13.4844   1
  -4  -7 -13-9.96075 26.0477   2
  -4  -7 -14 598.513 128.606   2
  -4  -7 -15 120.210 61.0167   2
  -4  -7 -16-65.3141 49.3738   2
  -4  -7 -17-4.69166 41.1710   2
  -4  -8  11 194.062 90.2871   3
   4   8 -11 122.392 68.3189   6
  -4  -8  10-29.5682 34.8750   3
   4   8 -10-5.78465 30.7154   6
   4   8  -9 456.336 87.2212   2
   4   8  -9 359.010 92.8307   6
  -4  -8   9 403.387 114.313   3
   4   8  -8 29.3436 21.6912   2
  -4  -8   8 70.2071 49.5757   3
   4   8  -8-15.7726 20.1226   6
  -4  -8   7 27.4383 40.2177   3
   4   8  -7 28.7356 26.0850   6
  -4  -8   6 147.071 60.3211   3
   4   8  -6 84.4610 40.9934   6
   4   8  -6 150.761 40.2583   2
  -4  -8   5 713.600 146.668   3
   4   8  -5 624.481 75.0040   2
   4   8  -5 672.239 108.738   6
  -4  -8   5 593.775 217.574   4
  -4  -8   4 2566.35 281.047   3
   4   8  -4 2181.14 120.953   2
  -4  -8   4 1973.61 372.152   4
  -4  -8   3 748.228 149.546   3
   4   8  -3 971.939 66.2244   2
  -4  -8   3 769.049 208.707   4
   4   8  -2 661.383 105.111   6
   4   8  -2 710.181 181.015   5
  -4  -8   2 464.720 144.857   4
   4   8  -1 145.612 54.2193   6
  -4  -8   1 156.443 84.9407   5
  -4  -8   1 144.612 90.4187   4
   4   8  -1 185.204 98.7453   5
  -4  -8   0-21.0139 66.6467   5
   4   8   0 67.6601 65.1141   5
   4   8   0 41.0948 31.7217   6
  -4  -8   0 71.6394 68.3283   4
  -4  -8  -1 140.043 94.0473   5
  -4  -8  -3 3143.37 137.006   2
   4   8   3 3460.71 121.397   2
  -4  -8  -3 3314.77 172.649   1
   4   8   3 2719.49 249.094   4
   4   8   4 1566.80 100.705   2
   4   8   4 1732.85 210.916   4
  -4  -8  -4 1704.22 123.966   2
  -4  -8  -4 1788.51 115.374   1
  -4  -8  -5 209.775 46.5270   2
   4   8   5 199.366 41.2736   2
  -4  -8  -5 158.762 28.4006   1
  -4  -8  -6 186.853 48.7432   2
   4   8   6 289.711 53.7853   2
   4   8   7 1188.41 123.463   2
  -4  -8  -7 1139.19 120.966   2
   4   8   8 754.705 104.155   2
  -4  -8  -8 757.302 104.909   2
  -4  -8  -9 475.369 91.2311   2
   4   8   9 436.832 87.6305   2
  -4  -8 -10 230.248 66.3246   2
   4   8  10 303.350 82.0208   6
   4   8  10 312.246 74.7261   2
  -4  -8 -11 248.011 71.6221   2
  -4  -8 -12 1044.47 158.513   2
  -4  -8 -13 1314.15 183.216   2
  -4  -8 -14 81.6916 48.5495   2
  -4  -8 -15-79.0564 52.3739   2
  -4  -8 -16-5.79687 24.3385   2
  -4  -8 -17 0.25300 38.4245   2
  -4  -9  11 11.5444 26.9021   3
   4   9 -11 21.8582 38.5344   6
  -4  -9  10-44.5410 43.2710   3
   4   9 -10 16.7040 25.1747   6
  -4  -9   9 150.230 74.3585   3
   4   9  -9 130.550 64.4566   6
  -4  -9   8 6.74391 41.2964   3
   4   9  -8 6.53785 16.1763   6
  -4  -9   7 274.733 88.0918   3
   4   9  -7 215.614 70.7161   6
   4   9  -6 0.76428 26.5041   6
  -4  -9   6 1.07353 29.5257   3
   4   9  -6-10.4915 18.1570   2
  -4  -9   5 1.75626 32.2309   3
   4   9  -5-32.0816 32.9700   6
   4   9  -5-5.97368 15.7038   2
  -4  -9   5-51.1145 70.0614   4
  -4  -9   4 87.5602 50.1556   3
   4   9  -4 119.473 48.1573   6
   4   9  -4 40.2098 17.1075   2
  -4  -9   4 47.6555 42.7489   4
  -4  -9   3-50.3310 55.9312   3
   4   9  -3 8.72436 26.5577   6
   4   9  -3 22.9612 13.5022   2
  -4  -9   3-8.01612 37.5429   4
   4   9  -3 40.8802 15.9870   2
   4   9  -2 147.112 24.3288   2
   4   9  -2 115.936 84.4720   5
   4   9  -2 134.795 19.0791   2
  -4  -9   2 103.596 91.4833   4
   4   9  -1-92.5655 72.0944   5
  -4  -9   1 114.917 95.1207   4
   4   9   0 184.667 60.2479   6
   4   9   0 207.888 101.513   5
  -4  -9   0 277.599 106.697   4
  -4  -9  -1 149.139 79.7172   5
   4   9   1 52.5776 65.2752   5
   4   9   2 8.94959 49.4051   5
   4   9   2 63.1245 12.9310   2
   4   9   3 843.436 64.3202   2
   4   9   3 759.740 189.078   5
   4   9   3 640.905 144.549   4
  -4  -9  -4 422.235 58.1563   1
   4   9   4 444.446 54.2816   2
   4   9   4 392.652 125.792   5
  -4  -9  -4 442.484 66.5669   2
   4   9   4 278.985 97.1773   4
  -4  -9  -5 954.563 78.2436   1
   4   9   5 862.802 85.6601   2
   4   9   5 867.083 206.428   5
   4   9   5 763.611 169.612   4
  -4  -9  -5 943.734 108.445   2
  -4  -9  -6 199.379 50.6587   2
  -4  -9  -6 181.630 23.7189   1
   4   9   6 200.905 48.0272   2
   4   9   6 94.9935 84.5982   5
  -4  -9  -7 387.297 76.2754   2
   4   9   7 404.471 69.7653   2
   4   9   8 980.036 121.223   2
  -4  -9  -8 888.608 120.022   2
   4   9   9 736.059 109.437   2
  -4  -9  -9 630.597 107.701   2
  -4  -9 -10 45.8463 33.8053   2
   4   9  10 123.156 50.6019   2
  -4  -9 -11 3996.67 296.774   2
  -4  -9 -12 684.751 131.942   2
  -4  -9 -13 254.861 78.0764   2
  -4  -9 -14 51.0397 41.6779   2
  -4  -9 -15 38.9131 20.4483   2
  -4  -9 -16 60.4055 56.4132   2
  -4  -9 -17 71.7141 58.4431   2
  -4 -10  10-13.2802 27.8383   3
   4  10 -10-33.3314 36.6359   6
  -4 -10   9-19.1095 30.9331   3
   4  10  -9 10.8004 19.5603   6
   4  10  -8 46.1582 40.1871   6
  -4 -10   8 21.1130 31.4318   3
   4  10  -7 47.4913 39.2129   6
  -4 -10   7 212.641 82.1284   3
  -4 -10   6 51.8220 49.6216   3
   4  10  -6 6.66719 19.6218   6
   4  10  -6 7.22549 16.0984   2
  -4 -10   5 43.8208 46.8626   3
   4  10  -5 20.8130 25.5912   6
   4  10  -5 8.25100 7.69521   2
   4  10  -4 72.3165 27.1711   2
  -4 -10   4 62.5785 37.7240   3
   4  10  -4 55.3410 38.8855   6
   4  10  -4 46.4123 19.0059   2
  -4 -10   4 245.550 143.467   4
   4  10  -3 1793.06 320.257   5
   4  10  -3 1665.34 91.1323   2
   4  10  -3 1876.62 212.998   6
  -4 -10   3 1488.30 320.721   4
   4  10  -3 1454.10 104.714   2
  -4 -10   3 1668.48 246.924   3
   4  10  -2 597.695 124.204   6
   4  10  -2 592.794 45.6975   2
   4  10  -2 345.965 140.909   5
  -4 -10   2 573.923 207.702   4
   4  10  -2 621.653 59.3764   2
   4  10  -1 2577.20 256.885   6
   4  10  -1 2623.36 77.6485   2
   4  10  -1 2688.86 377.872   5
   4  10  -1 3007.34 102.286   2
  -4 -10   1 2420.11 378.845   4
   4  10   0 660.506 41.8358   2
   4  10   0 556.504 174.743   5
   4  10   1 390.715 35.2059   2
   4  10   1 294.044 120.412   5
   4  10   2-7.43721 48.6664   5
   4  10   2 27.5813 10.4215   2
   4  10   3 476.085 54.3683   2
   4  10   3 563.589 167.774   5
   4  10   3 369.766 139.120   4
  -4 -10  -4 1020.67 100.509   2
   4  10   4 1069.59 90.2311   2
   4  10   4 952.128 213.843   5
   4  10   4 805.277 171.279   4
  -4 -10  -5 481.784 82.1107   2
   4  10   5 372.352 58.0166   2
   4  10   5 416.717 150.933   5
   4  10   5 319.124 116.588   4
  -4 -10  -6 599.995 56.2005   1
   4  10   6 509.257 74.4624   2
   4  10   6 737.886 200.067   5
   4  10   6 506.234 166.650   4
  -4 -10  -6 615.942 97.0218   2
   4  10   7 3287.92 434.744   5
   4  10   7 3044.93 198.067   2
  -4 -10  -7 3219.95 231.777   2
   4  10   8 3344.18 222.662   2
  -4 -10  -8 3317.87 245.107   2
   4  10   9 1792.98 175.781   2
  -4 -10  -9 1875.33 194.235   2
   4  10  10 979.910 137.297   2
  -4 -10 -10 774.540 127.887   2
  -4 -10 -11 2063.43 218.675   2
  -4 -10 -12-6.46206 27.2577   2
  -4 -10 -13 27.8166 30.8624   2
  -4 -10 -14-3.33786 31.6979   2
  -4 -10 -15 5.21687 26.6309   2
  -4 -10 -16-8.64485 26.4029   2
  -4 -10 -17 5.92629 24.0904   2
  -4 -11   9 34.0382 55.3019   3
   4  11  -9 0.22764 45.4308   6
  -4 -11   8 13.7188 28.8574   3
   4  11  -8 47.3224 40.2569   6
  -4 -11   7 14.9988 29.0975   3
   4  11  -7-3.87568 36.2162   6
  -4 -11   6 222.512 88.1709   3
   4  11  -6 121.550 67.6122   6
  -4 -11   5 134.920 72.1219   3
   4  11  -5 77.9240 46.5508   6
  -4 -11   4 111.226 66.6754   3
   4  11  -4 59.1409 37.6037   6
   4  11  -4 165.895 35.2668   2
  -4 -11   3 168.504 88.1883   3
   4  11  -3 125.400 47.6137   6
   4  11  -3 105.623 23.0545   2
  -4 -11   3-3.57477 34.4697   4
   4  11  -2-30.4193 40.4258   6
   4  11  -2 3.34003 11.3897   2
   4  11  -2-3.10452 7.17821   2
   4  11  -2-30.6347 58.8846   5
   4  11  -1 1293.14 193.396   6
   4  11  -1 1181.43 66.3520   2
   4  11  -1 1121.81 250.094   5
   4  11  -1 1304.75 83.8500   2
  -4 -11   1 1002.39 263.756   4
   4  11   0 75.9512 18.6840   2
   4  11   0 33.6163 35.6389   6
   4  11   0-5.34513 48.5687   5
   4  11   1 43.6717 60.3633   5
   4  11   1 43.3561 14.2655   2
   4  11   2 70.3620 32.9307   5
   4  11   2 15.2312 12.0319   2
   4  11   3 399.415 54.9559   2
   4  11   3 421.619 145.951   5
   4  11   3 389.416 159.406   4
   4  11   4 74.9135 69.6707   5
   4  11   4 5.64134 15.3819   2
   4  11   4-76.8259 63.3152   4
   4  11   5 16.7449 42.6111   5
   4  11   5 36.1665 18.7513   2
   4  11   5-58.7334 60.2906   4
  -4 -11  -5 77.2049 37.4667   2
   4  11   6 91.4908 81.2281   5
   4  11   6 164.970 47.0091   2
  -4 -11  -6 109.307 48.8974   2
  -4 -11  -7 29.6643 9.68604   1
   4  11   7 56.2128 85.9646   5
  -4 -11  -7-18.7579 24.7738   2
   4  11   7 49.6006 24.7225   2
  -4 -11  -8 136.354 54.9759   2
   4  11   8 194.870 52.8182   2
   4  11   9 603.691 103.433   2
  -4 -11  -9 554.536 107.211   2
  -4 -11 -10-3.23884 22.2990   2
  -4 -11 -11 1252.81 177.585   2
  -4 -11 -12 115.484 57.5296   2
  -4 -11 -13 27.8321 34.7501   2
  -4 -11 -14 43.5412 44.6245   2
  -4 -11 -15-23.4402 32.9954   2
  -4 -11 -16 28.6063 36.3445   2
  -4 -11 -17 3.41338 23.0295   2
   4  12  -8 46.7405 51.5200   6
  -4 -12   8 166.952 87.8900   3
  -4 -12   7 228.047 93.3487   3
   4  12  -7 146.230 71.1019   6
   4  12  -6 120.484 62.5359   6
  -4 -12   6 89.7906 55.2221   3
  -4 -12   5 49.2437 57.2782   3
   4  12  -5 101.908 69.6127   6
  -4 -12   4 8.72036 30.3403   3
   4  12  -4 73.7407 46.1466   6
   4  12  -3-54.5816 50.5474   6
  -4 -12   3 77.2751 57.1516   3
   4  12  -2 39.2223 47.3321   6
   4  12  -2 19.4531 9.12978   2
   4  12  -2-12.0736 83.7558   5
   4  12  -1 321.657 102.966   6
   4  12  -1 312.653 133.299   5
   4  12   0 44.6960 16.1251   2
   4  12   0 94.3666 63.3868   5
   4  12   0 98.4323 59.0971   6
   4  12   1 1163.78 89.7140   2
   4  12   1 1195.69 272.860   5
   4  12   2 526.468 63.9123   2
   4  12   2 520.266 166.519   5
   4  12   3-2.80671 55.0918   5
   4  12   3 185.749 42.3898   2
   4  12   4 801.784 212.899   5
   4  12   4 158.535 40.8061   2
   4  12   5 459.531 168.124   5
   4  12   5 322.465 62.1380   2
   4  12   6 180.109 117.388   5
   4  12   6 260.581 59.9019   2
  -4 -12  -6 313.200 73.8363   2
  -4 -12  -7 485.043 51.4887   1
   4  12   7 342.391 150.579   5
   4  12   7 418.115 80.3386   2
   4  12   7 525.168 167.772   4
  -4 -12  -7 620.650 113.549   2
   4  12   8 295.447 156.200   5
  -4 -12  -8 300.325 84.5108   2
   4  12   9 1971.59 193.497   2
  -4 -12  -9 1988.49 219.839   2
  -4 -12 -10 1168.47 172.765   2
  -4 -12 -11 5.29247 28.7953   2
  -4 -12 -12 258.428 86.4922   2
  -4 -12 -13 27.8567 37.2576   2
  -4 -12 -14 158.708 75.8897   2
  -4 -12 -15 188.769 84.8193   2
  -4 -12 -16 62.4915 73.8578   2
  -4 -12 -17-4.78014 23.8954   2
  -4 -13   7 53.0692 62.4944   3
   4  13  -7 45.4909 43.1414   6
   4  13  -6 9.92332 26.0457   6
  -4 -13   6-50.3289 45.4268   3
  -4 -13   5 50.3142 52.8917   3
   4  13  -5 78.1476 59.4475   6
  -4 -13   4 21.2029 22.4015   3
   4  13  -4-39.4464 41.3163   6
   4  13  -3 45.0167 24.3537   6
  -4 -13   3 55.6353 55.4069   3
   4  13  -2 104.463 61.0544   6
   4  13  -2-118.786 95.5032   5
   4  13  -1 203.828 81.0271   6
   4  13  -1 280.567 127.920   5
   4  13   0 16.8704 34.2766   6
   4  13   0 376.672 168.752   5
   4  13   1 142.643 87.2324   5
   4  13   2 44.3870 51.6466   5
   4  13   3 95.2469 83.7368   5
   4  13   3 49.5471 19.9557   2
   4  13   4 67.5756 87.8636   5
   4  13   4 60.0474 28.1498   2
   4  13   4 52.1263 68.5087   4
   4  13   5 8.29266 45.7756   5
   4  13   5 86.5150 35.9252   2
   4  13   5 27.5935 50.2175   4
   4  13   6 430.444 79.4816   2
  -4 -13  -6 401.811 86.9833   2
   4  13   6 626.784 202.132   5
   4  13   6 265.827 139.449   4
  -4 -13  -7 1154.01 158.959   2
   4  13   7 1281.42 312.281   5
   4  13   7 1076.57 133.644   2
   4  13   7 901.504 261.980   4
   4  13   8 705.297 234.975   5
   4  13   8 537.767 99.6785   2
   4  13   8 292.317 176.787   4
  -4 -13  -8 464.100 106.662   2
   4  13   9 117.131 102.551   5
  -4 -13  -9 127.392 56.9183   2
   4  13   9 307.928 164.568   4
  -4 -13 -10 2981.05 289.617   2
  -4 -13 -11 197.681 74.5987   2
  -4 -13 -12 141.632 54.4100   2
  -4 -13 -13 34.0662 35.8362   2
  -4 -13 -14 146.142 75.5886   2
  -4 -13 -15 162.060 73.7189   2
  -4 -13 -16 7.27325 50.7656   2
  -4 -14   6 43.8858 43.3164   3
   4  14  -5 118.796 80.1672   6
  -4 -14   5-70.4674 55.8906   3
  -4 -14   4 53.4484 35.9122   3
   4  14  -4 120.178 68.3568   6
  -4 -14   3-68.7556 57.4872   3
   4  14  -3 27.4407 35.4472   6
   4  14  -2 31.4720 38.3472   6
   4  14  -2 67.8195 75.3405   5
   4  14  -1 41.9065 60.3417   5
   4  14  -1-16.3319 35.1420   6
   4  14   0 118.871 66.6135   6
   4  14   0 329.358 165.682   5
   4  14   1 315.644 113.889   6
   4  14   1 266.684 151.409   5
   4  14   2 102.884 94.7121   5
   4  14   3-5.81514 51.2978   5
   4  14   4 268.560 149.798   5
   4  14   4 356.917 189.891   4
   4  14   5 33.1327 41.3815   5
   4  14   5 41.7409 51.0225   4
   4  14   6 282.404 162.959   5
   4  14   6 58.3100 79.6477   4
  -4 -14  -7 4.94327 20.0502   2
   4  14   7 71.1906 85.0907   5
   4  14   7 151.711 113.034   4
   4  14   8 122.130 107.354   5
  -4 -14  -8-3.00975 19.9619   2
   4  14   9 221.622 144.536   5
   4  14   9-54.2678 81.3082   4
  -4 -14  -9 84.6340 53.3491   2
   4  14  10 116.433 122.174   5
   4  14  10 236.626 176.430   4
  -4 -14 -10 141.807 68.0720   2
   4  14  11 221.877 130.743   5
  -4 -14 -11 133.550 70.5119   2
  -4 -14 -12-29.5285 34.7609   2
  -4 -14 -13 20.8561 31.1249   2
  -4 -14 -14-34.3880 39.3267   2
  -4 -14 -15 1.98857 19.7978   2
  -4 -14 -16-12.1497 29.5848   2
  -4 -15   5 40.4911 43.4602   3
   4  15  -4 22.0857 39.2569   6
  -4 -15   4 33.7910 42.3154   3
  -4 -15   3-34.5250 41.5460   3
   4  15  -3-75.3899 58.4463   6
  -4 -15   2-91.7862 67.0785   3
   4  15  -2 46.4551 46.2809   6
   4  15  -2 123.419 103.083   5
   4  15  -1 54.6456 50.3399   6
   4  15  -1 86.2851 80.8429   5
   4  15   0 37.6701 36.8995   6
   4  15   0 24.7212 56.1827   5
   4  15   1 63.8290 77.4072   5
   4  15   1-150.386 84.2393   6
   4  15   2 116.674 83.8101   5
   4  15   3 37.5168 63.2038   5
   4  15   4 56.8641 67.1334   5
   4  15   5 16.9024 52.4742   5
   4  15   5 216.284 125.326   4
   4  15   6 148.298 124.180   5
   4  15   6 202.338 139.918   4
   4  15   7-290.758 158.280   5
   4  15   7-75.5669 88.7146   4
  -4 -15  -8 44.5204 37.7712   2
   4  15   8-36.0008 69.2038   5
   4  15   9 126.774 128.436   5
   4  15   9-80.0396 97.2364   4
  -4 -15  -9 96.4245 54.1549   2
   4  15  10 53.4623 99.6041   5
   4  15  10 1.56249 95.6459   4
  -4 -15 -10 19.1252 34.6973   2
   4  15  11-111.934 118.388   5
   4  15  11 37.7208 81.1806   4
  -4 -15 -11-15.4607 29.6379   2
   4  15  12-132.893 84.1115   5
  -4 -15 -12 71.8393 57.7467   2
  -4 -15 -13 87.5298 62.3071   2
  -4 -15 -14 47.2914 36.9396   2
  -4 -15 -15 22.0536 35.4052   2
  -4 -16   3 3.75200 39.3268   3
   4  16  -2 1.86150 43.9890   6
  -4 -16   2 74.4627 60.9690   3
   4  16  -1 67.5746 75.9501   6
   4  16   0 617.191 173.894   6
   4  16   0 626.804 240.732   5
   4  16   1-93.3927 91.9842   5
   4  16   1 59.5794 58.2726   6
   4  16   2 98.6838 73.4252   6
   4  16   2-160.178 115.967   5
   4  16   3 28.7162 56.3528   5
   4  16   4 62.8812 90.6137   5
   4  16   5 262.798 167.068   5
   4  16   5 296.827 181.465   4
   4  16   6 195.715 130.058   5
   4  16   6-72.8044 87.4450   4
   4  16   7-43.0104 72.0075   5
   4  16   7 55.1886 77.7815   4
   4  16   8-120.900 111.523   5
   4  16   8-169.319 132.212   4
  -4 -16  -9 165.589 72.4680   2
   4  16   9 150.813 123.718   5
   4  16   9 171.346 144.247   4
  -4 -16 -10-1.65005 16.6187   2
   4  16  10 57.9897 87.8797   5
   4  16  11 28.2014 123.690   5
   4  16  11-207.177 171.746   4
  -4 -16 -11 70.2608 60.9307   2
   4  16  12-122.090 137.039   4
  -4 -16 -12 61.2317 50.8984   2
   4  16  13-80.4268 110.851   4
  -4 -16 -13 66.1941 53.5106   2
  -4 -16 -14 93.6760 64.8428   2
  -4 -16 -15-100.368 69.7129   2
   4  17   0 61.2646 58.4459   6
   4  17   1 0.36691 48.5607   6
   4  17   2-82.4328 69.5380   6
   4  17   4-196.124 136.411   5
   4  17   5-127.608 111.802   5
   4  17   6 65.6701 51.1682   5
   4  17   7-168.015 133.118   5
   4  17   8 201.309 148.855   5
   4  18   2 47.6640 54.6167   6
   4  18   3-17.5020 36.0355   6
   5 -13  -8-37.2804 42.3526   1
   5 -13  -7 75.2787 59.8892   1
   5 -13  -6 63.3866 69.1782   1
   5 -12 -10-2.18431 20.8713   1
   5 -12  -9 3.92475 39.7617   1
   5 -12  -8 145.731 74.9181   1
   5 -12  -7 66.3514 58.4514   1
   5 -12  -6 103.640 70.7945   1
  -5  12   5 100.141 148.310   4
  -5  12   4-211.322 197.373   4
  -5  12   3 2.30724 96.5301   4
  -5  12   2-109.247 144.296   4
  -5  12   1 80.6033 131.452   4
  -5  12   0 126.948 158.266   4
  -5  12  -1 58.4962 75.5215   6
  -5  12  -1-144.877 178.303   4
   5 -11 -11 0.22788 37.7047   1
   5 -11 -10 79.0073 53.5786   1
   5 -11  -9 104.484 64.9180   1
   5 -11  -8 102.161 60.6659   1
  -5  11   8 58.0470 122.967   4
   5 -11  -7-50.7196 45.2529   1
  -5  11   7-152.339 182.039   4
  -5  11   6-1.21373 82.6808   4
   5 -11  -6 113.507 71.7101   1
   5 -11  -5 96.1598 70.8643   1
  -5  11   5-140.552 171.194   4
  -5  11   4 444.133 276.387   4
  -5  11   3 164.360 209.711   4
  -5  11   2 140.107 157.775   4
  -5  11   1 0.98363 137.682   4
  -5  11   0 144.472 153.905   4
  -5  11  -1-245.184 209.032   4
  -5  11  -2 95.0230 88.5841   6
  -5  11  -2 96.5283 212.855   4
  -5  11  -3 208.324 131.437   6
  -5  11  -4-70.8102 74.6870   6
   5 -10 -12 29.5210 35.8417   1
   5 -10 -11 5.86986 23.3498   1
   5 -10 -10 110.075 62.6075   1
   5 -10  -9 240.242 109.365   2
   5 -10  -9 120.235 62.8328   1
  -5  10   9 123.468 270.080   4
   5 -10  -8 65.2505 48.0273   1
  -5  10   8-178.932 181.627   4
   5 -10  -7-56.3222 46.9105   1
  -5  10   7 247.651 207.746   4
   5 -10  -6 64.8353 51.1744   1
  -5  10   6-47.8086 117.619   4
   5 -10  -5 121.663 68.4469   1
  -5  10   5 285.757 182.285   4
  -5  10   4 99.0403 232.566   4
  -5  10   3 191.897 163.996   4
  -5  10   2 43.0221 128.224   4
  -5  10   1 73.3636 105.988   4
  -5  10   0 13.6421 135.578   4
  -5  10  -1-252.106 191.207   4
  -5  10  -2 140.559 87.6644   6
  -5  10  -2 242.243 150.270   4
  -5  10  -3 35.9741 55.4161   6
  -5  10  -4-0.42848 26.5325   6
  -5  10  -5-99.1129 79.9356   6
  -5  10  -6 95.1203 72.8295   6
   5  -9 -12 19.9116 36.5368   1
   5  -9 -11 83.5866 48.2198   1
   5  -9 -11-45.5708 52.1637   2
   5  -9 -10 167.503 86.6835   2
   5  -9 -10 100.252 58.7318   1
   5  -9  -9 66.4774 65.1902   2
   5  -9  -9 30.9092 31.5311   1
   5  -9  -8 243.055 99.8574   2
   5  -9  -8 218.357 78.3399   1
   5  -9  -7 62.6816 40.5421   1
  -5   9   7 26.0541 82.4438   4
   5  -9  -6 27.4677 26.1837   1
  -5   9   6-307.485 220.186   4
  -5   9   5 605.646 306.718   4
   5  -9  -5 608.981 131.713   1
  -5   9   4 118.322 54.5641   5
  -5   9   4 458.781 255.216   4
  -5   9   3 169.582 66.0722   5
  -5   9   3 316.012 209.125   4
  -5   9   2 114.647 67.7374   5
  -5   9   2-196.814 173.232   4
  -5   9   1 151.076 53.7714   5
  -5   9   1-277.249 199.818   4
  -5   9   0 136.484 143.390   4
  -5   9  -1 1070.94 364.720   4
  -5   9  -2 103.208 66.1779   6
  -5   9  -2 250.496 214.182   4
  -5   9  -3-147.900 98.4349   6
  -5   9  -3-189.145 178.682   4
  -5   9  -4 249.850 132.470   6
  -5   9  -5 367.492 142.826   6
  -5   9  -6 34.7044 47.5335   6
  -5   9  -7 0.36682 44.0716   6
  -5   9  -8 198.124 78.5962   6
   5  -8 -12 2.01266 18.7220   1
   5  -8 -12 112.227 92.6883   2
   5  -8 -11 23.0081 39.3468   2
   5  -8 -11 57.3675 34.3158   1
   5  -8 -10 217.446 81.8797   1
   5  -8 -10 188.133 91.1092   2
   5  -8  -9 258.061 94.5664   2
   5  -8  -9 231.794 76.8837   1
   5  -8  -8 48.3581 23.4001   2
   5  -8  -8 58.5996 36.4899   1
   5  -8  -7 690.245 162.108   2
   5  -8  -7 526.884 125.306   1
   5  -8  -6 154.756 57.7250   3
   5  -8  -6 121.667 64.3460   1
   5  -8  -5 1264.31 149.936   3
   5  -8  -5 1324.35 192.741   1
  -5   8   5 1471.35 470.075   4
   5  -8  -4 356.535 73.1331   3
  -5   8   4 695.485 341.807   4
   5  -8  -3-0.64298 15.4016   3
  -5   8   3-36.8219 34.6689   5
  -5   8   3 85.7087 146.420   4
   5  -8  -2 24.3251 16.6940   3
  -5   8   2 19.3850 25.0905   5
   5  -8  -1 102.672 30.6368   3
  -5   8   1 71.8228 33.2941   5
   5  -8   0-14.0072 12.0508   3
  -5   8   0 97.5006 129.904   4
  -5   8  -1 1545.54 430.663   4
  -5   8  -2 576.271 181.711   6
  -5   8  -2 499.199 255.708   4
  -5   8  -3 4.45727 70.7349   6
  -5   8  -3-19.9041 87.7083   4
  -5   8  -4 710.000 194.060   6
  -5   8  -5 387.074 139.690   6
  -5   8  -6 18.7439 45.1800   6
  -5   8  -7 38.3127 53.5318   6
  -5   8  -8 341.245 135.499   6
  -5   8  -9 114.666 90.3950   6
   5  -7 -12 23.0712 73.5640   2
   5  -7 -11-69.3720 46.6718   1
   5  -7 -11 69.3756 72.5005   2
   5  -7 -10 56.4873 50.7039   1
   5  -7 -10 59.9263 52.6563   2
   5  -7  -9 155.147 70.6467   1
   5  -7  -9 193.792 83.6613   2
   5  -7  -8-5.85455 45.7764   1
   5  -7  -8-28.9998 42.1059   2
   5  -7  -7-44.1919 27.4464   2
   5  -7  -7-40.0989 43.8056   1
   5  -7  -6-3.00262 29.7360   2
   5  -7  -6 72.4370 39.9944   3
   5  -7  -6 117.200 70.2434   1
   5  -7  -5 150.949 48.9915   3
   5  -7  -5 117.115 49.7248   1
  -5   7   5 362.033 206.574   4
   5  -7  -4 145.159 67.7602   1
   5  -7  -4 203.602 53.7846   3
  -5   7   4 149.433 153.327   4
   5  -7  -3 39.9119 23.4070   3
  -5   7   3 55.4376 169.273   4
   5  -7  -2 237.462 53.2876   3
  -5   7   2 239.983 67.5892   5
  -5   7   2 548.692 260.630   4
   5  -7  -1 19.5653 19.0654   3
  -5   7   1-14.9192 19.8815   5
  -5   7   1-53.2749 102.429   4
  -5   7   0 222.675 165.415   4
  -5   7  -1-15.2465 77.1785   4
  -5   7  -2 843.801 317.633   4
  -5   7  -3 833.381 199.867   6
  -5   7  -3 1058.71 367.753   4
  -5   7  -4 1090.38 226.789   6
  -5   7  -5 239.082 112.439   6
  -5   7  -6-156.321 87.8441   6
  -5   7  -7 122.926 83.8915   6
  -5   7  -8 254.789 114.186   6
  -5   7  -9 16.4952 47.1386   6
  -5   7 -10 0.31542 25.2209   6
  -5   7 -11 56.2964 54.9361   6
   5  -6 -13-148.861 86.6675   2
   5  -6 -12 133.099 91.7181   2
   5  -6 -11 512.850 115.938   1
   5  -6 -11 623.361 162.877   2
   5  -6 -10 493.452 144.025   2
   5  -6 -10 581.204 123.423   1
   5  -6  -9 399.012 102.286   1
   5  -6  -9 455.669 126.395   2
   5  -6  -8 597.872 122.385   1
   5  -6  -8 528.007 134.905   2
   5  -6  -7 186.923 61.5301   1
   5  -6  -7 229.459 92.5463   2
   5  -6  -6 5043.02 319.636   3
   5  -6  -6 5557.77 418.783   2
   5  -6  -6 5191.70 360.642   1
   5  -6  -5 646.811 107.284   3
   5  -6  -5 617.219 125.623   1
   5  -6  -4 147.974 47.1026   3
   5  -6  -4 43.1528 29.4092   1
  -5   6   4 66.1015 138.251   4
   5  -6  -3 197.417 52.8104   3
  -5   6   3 260.058 139.953   4
   5  -6  -2 347.168 65.0384   3
  -5   6   2 547.235 238.111   4
   5  -6  -1 203.864 46.1990   3
  -5   6   1 277.808 53.9047   5
  -5   6   1 16.8705 118.838   4
  -5   6   0 252.388 183.389   4
  -5   6  -1 187.764 136.454   4
  -5   6  -2 129.443 139.737   4
  -5   6  -3 896.289 196.003   6
  -5   6  -3 670.040 269.602   4
  -5   6  -4 89.2366 58.9347   6
  -5   6  -5 4994.90 454.361   6
  -5   6  -6 56.6544 47.3929   6
   5  -6   6 27.2186 21.5362   5
  -5   6  -7 605.301 160.656   6
   5  -6   7 556.990 125.302   5
  -5   6  -8 467.597 135.595   6
  -5   6  -9 395.103 130.221   6
  -5   6 -10 26.0214 39.8802   6
  -5   6 -11 217.992 99.0317   6
  -5   6 -12-90.8101 67.2185   6
   5  -5 -14 158.028 83.6314   2
   5  -5 -13-2.54518 27.1085   2
   5  -5 -12 6.25645 30.2465   2
   5  -5 -11 478.552 139.677   2
   5  -5 -10 169.784 60.7096   1
   5  -5 -10 150.014 70.7902   2
   5  -5  -9 151.675 84.3480   2
   5  -5  -9 203.891 69.6645   1
   5  -5  -8 1387.77 210.972   2
   5  -5  -8 1373.21 183.017   1
   5  -5  -7 176.434 66.1803   1
   5  -5  -7 202.668 85.4112   2
   5  -5  -6 5446.04 334.507   3
   5  -5  -6 5369.54 398.112   2
   5  -5  -6 5332.45 355.298   1
   5  -5  -5 251.330 84.8410   2
   5  -5  -5 326.604 74.5537   3
   5  -5  -5 422.419 100.550   1
   5  -5  -4 12.6080 18.8569   3
   5  -5  -4 26.3145 32.7482   1
   5  -5  -3 156.886 45.8740   3
   5  -5  -3 166.057 67.1245   1
  -5   5   3 69.1184 87.5503   4
   5  -5  -2 439.281 73.5332   3
  -5   5   2 698.675 269.502   4
   5  -5  -1 652.540 84.2258   3
  -5   5   1 697.658 79.0333   5
  -5   5   1 527.114 208.730   4
  -5   5   0 803.791 290.241   4
  -5   5  -1 270.839 136.351   4
  -5   5  -2 203.977 120.807   4
  -5   5  -3 68.0383 44.8014   6
  -5   5  -3-281.972 208.049   4
  -5   5  -4 1015.41 198.298   6
  -5   5  -5-67.1141 66.2448   6
  -5   5  -6 43.0623 40.7173   6
   5  -5   6-15.2709 26.4406   5
  -5   5  -7 18.9184 34.4804   6
   5  -5   7 104.308 53.9719   5
  -5   5  -8 35.7029 44.4903   6
   5  -5   8 58.1209 42.5793   5
  -5   5  -9 39.8475 31.8413   6
  -5   5 -10-2.91464 41.9390   6
  -5   5 -11 229.413 95.2943   6
  -5   5 -12 55.3442 51.7782   6
  -5   5 -13 48.9799 49.2793   6
   5  -4 -14-1.64187 20.4920   2
   5  -4 -13-100.759 70.0667   2
   5  -4 -12 108.859 73.3870   2
   5  -4 -11-0.78573 23.1309   2
   5  -4 -10 191.794 84.4041   2
   5  -4  -9 66.6577 45.5889   2
   5  -4  -9 75.2824 31.7655   1
   5  -4  -8-3.70670 27.8298   1
   5  -4  -8 50.1410 43.5346   2
   5  -4  -7 4411.85 354.599   2
   5  -4  -7 4537.08 320.575   1
   5  -4  -6 62.7730 37.5435   3
   5  -4  -6 126.467 49.0109   1
   5  -4  -6 76.1688 48.1661   2
   5  -4  -5 13.2925 28.4064   1
   5  -4  -5 2.34211 26.3281   2
   5  -4  -5 16.6231 27.4524   3
   5  -4  -4 22.4946 11.2378   3
  -5   4   4-5.54812 22.6845   2
   5  -4  -4-40.8868 42.6341   2
   5  -4  -4-1.94502 22.8759   1
  -5   4   3 36.5735 36.9534   2
  -5   4   3-40.2502 82.4983   4
   5  -4  -3 2.35167 16.1464   3
   5  -4  -3 0.71107 29.8808   1
   5  -4  -2 7.20942 13.4882   3
  -5   4   2 28.6911 26.7664   2
  -5   4   2-88.8566 114.425   4
  -5   4   1 186.627 68.3955   2
  -5   4   1 253.080 162.556   4
   5  -4  -1 156.090 43.6635   3
  -5   4   0 6578.76 439.949   2
  -5   4   0 5139.17 670.459   4
  -5   4  -1 1692.04 230.292   2
  -5   4  -1 963.553 273.000   4
  -5   4  -2 1.53779 100.503   4
  -5   4  -3 347.438 102.213   6
   5  -4   3 386.017 175.875   4
  -5   4  -3 504.174 246.185   4
  -5   4  -4 817.321 168.702   6
   5  -4   4 831.902 297.033   4
  -5   4  -5 498.527 131.404   6
   5  -4   5 607.145 82.0101   5
   5  -4   6 4338.13 270.630   5
  -5   4  -6 4800.97 390.831   6
  -5   4  -7 2666.48 296.751   6
   5  -4   7 2847.16 255.450   5
  -5   4  -8 1941.49 253.863   6
   5  -4   8 2107.47 242.137   5
  -5   4  -9 272.626 94.6924   6
   5  -4   9 110.522 69.0713   5
  -5   4 -10 518.263 136.075   6
   5  -4  10 330.336 111.039   5
  -5   4 -11 241.539 89.7529   6
  -5   4 -12 33.7738 40.9962   6
  -5   4 -13 39.4184 39.2177   6
  -5   4 -14-23.8278 34.5225   2
   5  -3 -14 88.9202 78.4190   2
   5  -3 -13-39.6861 46.7862   2
   5  -3 -12 149.070 87.3299   2
   5  -3 -11 36.2458 44.9677   2
   5  -3 -10 323.013 109.270   2
   5  -3  -9 525.434 109.523   1
   5  -3  -9 394.810 110.240   2
   5  -3  -8 3.62499 41.2327   2
   5  -3  -8-16.1233 37.3383   1
   5  -3  -7 5934.22 403.537   2
   5  -3  -7 6007.39 363.196   1
   5  -3  -6 949.803 143.115   3
   5  -3  -6 933.144 140.221   1
   5  -3  -6 740.312 140.957   2
   5  -3  -5 272.797 75.4961   3
  -5   3   5 320.514 80.3074   2
   5  -3  -5 300.629 81.4197   1
   5  -3  -5 348.077 93.2277   2
   5  -3  -4 748.875 114.082   3
   5  -3  -4 820.787 141.357   2
   5  -3  -4 873.325 132.247   1
  -5   3   4 895.020 138.252   2
   5  -3  -3 1389.93 148.511   3
   5  -3  -3 1149.89 153.818   1
  -5   3   3 1359.03 169.060   2
   5  -3  -2 2964.28 204.628   3
  -5   3   2 2626.73 241.190   2
   5  -3  -2 2607.02 222.581   1
  -5   3   2 2907.49 480.517   4
  -5   3   1 483.071 66.2607   5
  -5   3   1 522.561 216.087   4
  -5   3   1 564.076 119.226   2
  -5   3   0 4565.60 343.651   2
  -5   3   0 4163.76 556.961   4
  -5   3  -1 1127.06 183.150   2
  -5   3  -1 821.618 252.032   4
   5  -3   2 622.928 243.992   4
  -5   3  -2 162.102 111.090   4
  -5   3  -3 46.3686 35.4091   6
   5  -3   3-106.056 132.376   4
  -5   3  -3 15.9266 70.2603   4
  -5   3  -4 36.5958 45.0841   6
   5  -3   4 45.4634 79.0742   4
  -5   3  -5 193.853 75.6758   6
   5  -3   5 211.212 43.6122   5
   5  -3   5 284.463 188.518   4
  -5   3  -6 60.4615 42.2241   6
   5  -3   6 46.5682 32.3081   5
  -5   3  -7 1146.62 184.893   6
   5  -3   7 1046.96 143.704   5
  -5   3  -8 77.9162 52.5368   6
   5  -3   8 71.4505 46.4040   5
  -5   3  -9-6.51930 34.5022   6
   5  -3   9 37.0952 21.7467   5
  -5   3 -10 842.034 163.453   6
  -5   3 -11-42.1414 42.5074   6
  -5   3 -12 253.711 95.3157   6
  -5   3 -13-30.6339 39.4447   6
  -5   3 -14 48.8004 47.9064   6
  -5   3 -14 0.24549 34.5841   2
   5  -2 -15 167.232 108.096   2
   5  -2 -14 7.86690 40.2178   2
   5  -2 -13 13.5357 32.0316   2
   5  -2 -12 149.807 81.9776   2
   5  -2 -11 173.014 79.3030   2
   5  -2 -10 51.5802 40.6266   2
   5  -2  -9 288.589 95.8889   2
   5  -2  -8 538.259 123.603   2
   5  -2  -8 500.074 104.787   1
   5  -2  -7 829.658 149.035   2
   5  -2  -7 808.989 134.479   1
   5  -2  -6 558.548 109.693   1
  -5   2   6 512.278 103.103   2
   5  -2  -6 529.137 109.243   3
   5  -2  -6 593.670 121.921   2
   5  -2  -5 361.386 86.1829   3
   5  -2  -5 440.957 92.1169   1
  -5   2   5 526.840 98.6724   2
   5  -2  -5 492.833 108.045   2
   5  -2  -4 635.891 117.401   2
   5  -2  -4 613.386 111.332   3
   5  -2  -4 682.516 111.773   1
  -5   2   4 734.357 120.054   2
   5  -2  -3 823.672 118.765   3
   5  -2  -3 816.485 126.468   2
   5  -2  -3 749.410 118.798   1
  -5   2   3 795.693 120.157   2
   5  -2  -2 870.085 124.496   1
  -5   2   2 897.732 129.723   2
   5  -2  -2 1001.23 125.009   3
  -5   2   1 551.013 72.7746   3
  -5   2   1 461.349 76.5049   5
   5  -2  -1 434.396 95.3461   1
  -5   2   1 633.601 184.663   4
  -5   2   1 557.664 107.416   2
  -5   2   0 13194.1 541.987   2
  -5   2   0 11633.6 273.287   5
  -5   2   0 11529.1 296.001   3
  -5   2   0 12605.5 935.198   4
  -5   2  -1 2440.59 119.577   3
  -5   2  -1 2010.90 347.755   4
  -5   2  -2 2158.61 230.103   6
   5  -2   2 2723.52 419.082   4
  -5   2  -2 1750.07 314.788   4
  -5   2  -3 786.507 136.491   6
   5  -2   3 1031.36 293.765   4
  -5   2  -3 584.509 206.273   4
  -5   2  -4 378.246 99.9152   6
   5  -2   4 213.083 145.637   4
  -5   2  -5 248.192 71.8647   6
   5  -2   5 276.311 48.4192   5
   5  -2   5 423.861 202.398   4
  -5   2  -6 440.638 104.086   6
   5  -2   6 431.193 211.237   4
  -5   2  -7 565.586 50.3400   3
  -5   2  -7 483.361 113.561   6
   5  -2   7 503.001 197.658   4
  -5   2  -8-64.3511 57.4428   6
  -5   2  -8 15.0744 13.4839   3
  -5   2  -9 34.0496 19.6029   3
  -5   2  -9-58.2965 54.2582   6
  -5   2 -10 47.2180 38.6847   6
  -5   2 -10 70.6098 29.7208   3
  -5   2 -11-85.8688 62.0694   6
  -5   2 -11-35.0478 25.6229   3
  -5   2 -12-31.9779 42.1377   6
  -5   2 -13 197.613 86.3510   6
  -5   2 -13 97.2583 61.7312   2
  -5   2 -14 3.93690 23.2520   6
  -5   2 -14 5.85836 22.5441   2
  -5   2 -15 20.4870 31.5196   2
  -5   2 -15-115.180 69.5785   6
   5  -1 -15 38.0087 46.8332   2
   5  -1 -14-46.7625 48.5784   2
   5  -1 -13 9.13540 43.0137   2
   5  -1 -12 56.3129 44.1901   2
   5  -1 -11 43.0893 51.5547   2
   5  -1 -10 80.9663 41.7351   2
  -5   1   9 27.7738 27.4797   6
   5  -1  -9 103.102 57.0394   2
   5  -1  -8 6104.27 395.007   2
  -5   1   8 6205.79 371.255   6
  -5   1   7 95.4352 49.4758   6
   5  -1  -7 61.1829 56.8031   2
   5  -1  -7 124.380 52.8502   1
  -5   1   7 62.3617 40.2229   2
   5  -1  -6 23.4404 25.2721   3
   5  -1  -6 11.5914 26.4675   2
  -5   1   6-1.83928 16.0945   2
   5  -1  -6-4.03658 24.0932   1
   5  -1  -5 1389.28 175.544   3
  -5   1   5 1595.51 163.067   3
   5  -1  -5 1470.15 179.934   2
   5  -1  -5 1317.92 158.977   1
  -5   1   5 1720.80 174.762   2
  -5   1   4 25.3803 33.3218   2
  -5   1   4 1.82380 17.3486   3
   5  -1  -4 8.10186 25.1745   1
   5  -1  -4 1.52528 19.4325   3
   5  -1  -4-4.32706 24.9537   2
  -5   1   3 3432.34 211.631   3
   5  -1  -3 3279.82 243.559   1
  -5   1   3 3433.33 238.338   2
   5  -1  -3 3528.00 254.125   3
  -5   1   2 1462.79 128.590   3
  -5   1   2 1519.06 163.299   5
   5  -1  -2 1414.62 160.404   1
  -5   1   2 1345.40 149.354   2
  -5   1   1 403.327 63.9785   3
   5  -1  -1 435.591 87.6121   1
  -5   1   1 395.218 76.3947   5
  -5   1   1 420.739 161.633   4
  -5   1   1 423.536 86.7030   2
  -5   1   0 1254.87 103.623   3
  -5   1   0 1488.56 168.654   2
  -5   1   0 1350.10 126.468   5
   5  -1   0 1234.44 145.920   1
  -5   1   0 1238.68 290.293   4
  -5   1  -1 1520.52 102.912   3
  -5   1  -1 2111.25 217.289   2
  -5   1  -1 1775.73 322.672   4
  -5   1  -2 1260.64 84.8543   3
  -5   1  -2 1266.62 158.835   6
  -5   1  -2 973.693 221.129   4
  -5   1  -3-4.41726 11.1151   3
  -5   1  -3-14.1315 21.3248   6
   5  -1   3-40.5229 51.4166   4
  -5   1  -3 42.9159 66.1734   4
  -5   1  -4 191.456 59.2797   6
   5  -1   4 249.676 42.4590   5
   5  -1   4 254.660 134.682   4
  -5   1  -5 39.2632 28.9042   6
   5  -1   5 26.8521 64.5259   4
   5  -1   6 2768.93 454.461   4
  -5   1  -6 3103.77 255.521   6
  -5   1  -7 205.284 71.0983   6
  -5   1  -7 152.741 30.4488   3
   5  -1   7 185.849 76.7806   6
   5  -1   7 191.731 135.572   4
   5  -1   8 26.2232 35.3738   6
  -5   1  -8-21.5622 26.3392   6
  -5   1  -9 1276.05 109.091   3
  -5   1  -9 1257.75 174.664   6
  -5   1 -10 1789.49 142.745   3
  -5   1 -10 1925.95 223.983   6
  -5   1 -11 758.697 102.464   3
  -5   1 -11 617.922 134.235   6
  -5   1 -12 825.282 117.760   3
  -5   1 -12 934.387 167.452   6
  -5   1 -13 63.2224 35.0619   6
  -5   1 -13 43.7406 19.2229   2
  -5   1 -14 10.7141 38.6724   2
  -5   1 -14-29.3331 53.9715   6
  -5   1 -15 377.495 120.726   6
  -5   1 -15 208.734 87.5413   2
   5   0 -15 21.6015 34.0141   2
   5   0 -14-30.6134 39.5251   2
   5   0 -13 106.853 65.5083   2
   5   0 -12-3.32222 21.6849   2
   5   0 -11 51.6628 39.0361   2
   5   0 -10 13.9045 27.3953   2
  -5   0   9 164.876 63.1073   6
   5   0  -9 79.3625 35.7612   2
  -5   0   8 3737.39 281.881   6
  -5   0   8 4068.03 286.496   2
   5   0  -8 3681.48 306.621   2
  -5   0   7 40.2078 29.2129   6
  -5   0   7 58.3244 37.2275   3
   5   0  -7 21.7649 30.6735   2
  -5   0   7 30.7161 26.1102   2
   5   0  -6 1247.70 160.076   2
  -5   0   6 1064.79 141.013   3
  -5   0   6 1361.79 146.864   6
   5   0  -6 1251.39 151.714   1
  -5   0   6 1324.19 152.283   2
   5   0  -6 974.179 156.897   3
  -5   0   5 1708.57 169.848   3
   5   0  -5 1816.32 187.254   2
   5   0  -5 1687.04 175.480   1
  -5   0   5 1889.24 174.892   2
  -5   0   5 1897.12 207.348   1
   5   0  -5 1661.57 198.034   3
   5   0  -4 43.0075 37.4507   3
  -5   0   4 89.6005 36.2232   2
  -5   0   4 66.8646 34.2948   3
  -5   0   4 99.7904 42.5600   5
   5   0  -4 62.5767 29.4624   1
  -5   0   3 1033.72 118.050   3
   5   0  -3 992.210 131.662   1
  -5   0   3 757.626 131.490   5
  -5   0   3 963.288 118.768   2
  -5   0   2 416.420 70.8129   3
  -5   0   2 355.009 70.7902   2
  -5   0   2 453.825 96.5694   5
   5   0  -2 421.439 87.2734   1
  -5   0   1 2718.47 171.450   3
  -5   0   1 2815.08 236.330   5
   5   0  -1 2487.65 202.829   1
  -5   0   1 2529.78 188.819   2
  -5   0   0 45.9052 22.0881   3
   5   0   0 19.6154 32.2639   1
  -5   0   0 27.3248 21.9524   5
  -5   0   0-41.6815 103.223   4
  -5   0   0 13.7280 14.0913   2
  -5   0  -1 1161.08 105.406   3
  -5   0  -1 1106.18 115.508   5
  -5   0  -1 1546.31 170.599   2
  -5   0  -1 1116.09 226.030   4
  -5   0  -2 13.6346 13.3545   3
  -5   0  -2 15.3347 24.0598   6
   5   0   2 0.97977 15.9415   5
  -5   0  -2 34.3805 53.2981   4
   5   0   3 2726.14 157.662   5
  -5   0  -3 2612.37 197.404   6
   5   0   3 2453.02 371.154   4
  -5   0  -3 2459.45 355.193   4
  -5   0  -4 362.001 75.9135   6
   5   0   4 372.343 65.7425   5
   5   0   4 373.534 146.303   4
  -5   0  -5 131.324 50.3101   6
   5   0   5 502.678 186.980   4
  -5   0  -6 817.243 123.035   6
   5   0   6 729.976 140.885   6
   5   0   6 688.915 209.067   4
   5   0   7 2200.28 257.362   6
  -5   0  -7 2025.21 197.012   6
   5   0   7 1989.64 385.743   4
  -5   0  -8 705.079 121.215   6
   5   0   8 806.583 162.663   6
   5   0   8 919.340 291.275   4
   5   0   9 1174.76 206.547   6
  -5   0  -9 878.156 141.849   6
   5   0   9 1395.36 377.802   4
  -5   0 -10 679.591 90.9585   3
  -5   0 -10 797.028 138.936   6
  -5   0 -11 572.685 88.8876   3
  -5   0 -11 555.738 124.740   6
  -5   0 -12 147.056 49.9251   3
  -5   0 -12 130.816 64.9377   6
  -5   0 -12 231.282 78.3264   2
  -5   0 -13-7.64380 14.6289   3
  -5   0 -13-11.2043 43.8969   6
  -5   0 -13-17.5233 28.4338   2
  -5   0 -14 15.0430 22.3174   6
  -5   0 -14 151.908 74.0626   2
  -5   0 -15-16.7533 31.6439   6
  -5   0 -15 26.7934 33.8116   2
  -5   0 -16-54.3962 50.5378   6
  -5   0 -16-8.79254 23.1554   2
   5   1 -15-23.6217 35.8936   2
   5   1 -14 1.85143 35.6880   2
   5   1 -13-27.9469 36.1624   2
   5   1 -12 79.4864 43.0738   2
   5   1 -11 166.171 72.2895   2
   5   1 -10 782.547 155.569   2
  -5  -1   9 4044.19 324.741   3
  -5  -1   9 4097.00 314.887   6
   5   1  -9 3934.67 313.962   2
  -5  -1   8 308.213 78.9946   6
  -5  -1   8 359.648 93.2058   3
   5   1  -8 288.281 78.9922   2
  -5  -1   8 244.421 66.2435   2
  -5  -1   7 66.9096 35.2459   6
  -5  -1   7 121.603 54.9168   3
   5   1  -7 36.9494 18.4811   2
  -5  -1   7 78.5215 35.1476   2
  -5  -1   6 147.449 54.3491   3
  -5  -1   6 176.666 52.0372   6
   5   1  -6 98.6013 44.7806   2
  -5  -1   6 103.062 62.4546   5
  -5  -1   6 156.067 51.8390   2
  -5  -1   5 48.2145 36.5262   3
  -5  -1   5 57.8429 30.3501   6
  -5  -1   5 14.5811 16.5110   1
  -5  -1   5 24.6770 33.0628   5
   5   1  -5 20.5318 20.4316   1
  -5  -1   5 43.3439 26.9562   2
  -5  -1   4 3383.42 233.094   3
  -5  -1   4 3411.81 187.840   6
   5   1  -4 3073.46 227.051   1
  -5  -1   4 3167.95 306.790   5
  -5  -1   4 3495.76 218.992   2
  -5  -1   3 3149.96 215.981   3
   5   1  -3 3002.41 220.975   1
   5   1  -3 3226.05 219.153   2
  -5  -1   3 2797.74 273.777   5
  -5  -1   3 2983.73 196.405   2
  -5  -1   2-10.8446 24.0531   3
   5   1  -2-2.24197 15.9427   1
  -5  -1   2 0.42584 11.5029   2
  -5  -1   2 6.65628 42.8391   5
  -5  -1   1 12482.8 406.198   3
  -5  -1   1 11988.3 535.760   5
   5   1  -1 11474.7 421.051   1
  -5  -1   1 11294.2 369.466   2
  -5  -1   0 10654.8 374.293   3
  -5  -1   0 9694.98 351.746   2
  -5  -1   0 10194.1 463.447   5
   5   1   0 10251.0 391.888   1
  -5  -1   0 10338.7 657.167   4
  -5  -1  -1 11509.3 344.883   6
  -5  -1  -1 11850.0 453.572   5
  -5  -1  -1 13916.7 462.163   2
   5   1   1 11915.6 415.453   5
   5   1   1 12422.9 421.661   1
  -5  -1  -1 11694.2 669.374   4
   5   1   2-18.2231 31.8727   5
  -5  -1  -2-11.6995 27.5011   6
  -5  -1  -2 20.7377 39.1030   4
  -5  -1  -3 1696.33 135.870   6
   5   1   3 1759.06 162.474   5
   5   1   3 1641.81 270.638   4
  -5  -1  -4 4267.40 225.022   6
   5   1   4 4355.23 267.794   5
   5   1   4 4093.24 452.881   4
   5   1   5 482.423 102.516   6
  -5  -1  -5 481.387 78.6850   6
   5   1   5 347.981 120.306   4
  -5  -1  -6 252.208 62.2195   6
   5   1   6 203.298 68.8460   6
   5   1   6 143.688 70.0084   4
   5   1   7 455.283 108.523   6
  -5  -1  -7 468.301 87.0215   6
   5   1   7 275.554 171.964   4
  -5  -1  -8 712.681 111.983   6
   5   1   8 536.045 121.651   6
   5   1   9 3590.27 334.670   6
  -5  -1  -9 3431.48 266.663   6
  -5  -1 -10 368.274 96.6625   6
  -5  -1 -11 50.3943 30.5435   6
  -5  -1 -11-82.1282 62.8867   2
  -5  -1 -12 293.946 97.5190   6
  -5  -1 -12 196.089 53.4988   3
  -5  -1 -12 266.747 77.7027   2
  -5  -1 -13 83.8667 40.0005   3
  -5  -1 -13 213.378 84.3763   6
  -5  -1 -13 152.980 66.3133   2
  -5  -1 -14 39.9733 49.9900   6
  -5  -1 -14 20.7762 39.0097   2
  -5  -1 -15 286.765 105.889   6
  -5  -1 -15 149.808 67.2492   2
  -5  -1 -16 65.9591 58.7850   2
   5   2 -15 42.8522 44.3439   2
   5   2 -14 43.3234 45.3634   2
   5   2 -13 56.4932 46.6302   2
   5   2 -12 284.024 97.6461   2
   5   2 -11 100.299 53.5111   2
  -5  -2  10 128.159 55.4050   3
   5   2 -10 102.645 60.2574   2
  -5  -2   9 1187.25 177.572   3
  -5  -2   9 1048.05 164.660   6
  -5  -2   9 1152.54 149.694   2
   5   2  -9 1100.68 163.785   2
  -5  -2   8 172.257 65.4528   6
  -5  -2   8 179.036 73.5207   3
   5   2  -8 51.8804 25.5000   2
  -5  -2   8 107.081 43.9653   2
  -5  -2   7 603.429 108.718   6
  -5  -2   7 508.222 105.584   3
  -5  -2   7 520.777 90.2874   2
   5   2  -7 450.615 93.8342   2
  -5  -2   6 207.930 55.2073   6
  -5  -2   6 183.715 62.9295   3
  -5  -2   6 183.355 81.7619   5
  -5  -2   6 203.301 53.7840   2
  -5  -2   5 146.132 58.9288   1
  -5  -2   5 65.6760 40.6131   3
  -5  -2   5 110.264 33.8251   6
  -5  -2   5 90.4004 55.6838   5
  -5  -2   5 106.051 35.4168   2
  -5  -2   4 421.270 62.4015   6
  -5  -2   4 553.132 109.051   1
  -5  -2   4 559.605 95.9148   3
  -5  -2   4 482.666 75.4391   2
   5   2  -4 507.983 85.4267   2
  -5  -2   4 390.187 108.107   5
  -5  -2   3 568.963 64.1151   6
  -5  -2   3 536.978 94.4982   3
   5   2  -3 568.620 85.7182   2
  -5  -2   3 453.287 119.430   5
  -5  -2   3 477.688 72.7677   2
   5   2  -3 447.117 81.9474   1
  -5  -2   2 1081.18 134.336   3
  -5  -2   2 1120.99 75.6849   6
   5   2  -2 1064.49 126.454   1
  -5  -2   2 1038.64 179.600   5
  -5  -2   2 1165.10 110.379   2
  -5  -2   1 3513.84 243.898   3
   5   2  -1 3294.80 214.762   1
  -5  -2   1 3201.17 299.060   5
  -5  -2   1 3455.17 232.020   1
  -5  -2   1 3209.64 177.693   2
  -5  -2   0 3895.70 197.114   2
   5   2   0 3980.15 235.975   1
  -5  -2   0 4274.90 330.694   5
   5   2   0 4004.55 286.501   5
  -5  -2   0 4754.83 394.030   4
  -5  -2   0 4771.20 281.412   3
  -5  -2  -1 1312.71 78.8472   6
  -5  -2  -1 1408.93 176.759   5
   5   2   1 1282.40 157.464   5
   5   2   1 1414.66 135.120   1
  -5  -2  -1 1103.70 167.997   4
  -5  -2  -1 1512.82 134.849   2
  -5  -2  -2 12360.2 266.747   6
   5   2   2 12298.3 491.986   5
   5   2   2 12425.0 404.577   1
  -5  -2  -2 11236.9 562.455   4
  -5  -2  -3 7884.60 240.499   6
   5   2   3 8024.11 402.258   5
   5   2   3 7495.45 305.420   1
   5   2   3 7305.90 493.404   4
   5   2   4 3746.22 237.231   6
  -5  -2  -4 3950.68 188.947   6
   5   2   4 4100.54 291.873   5
   5   2   4 3953.26 398.298   4
   5   2   5 7725.14 357.466   6
  -5  -2  -5 8035.50 294.285   6
   5   2   5 7697.40 578.810   4
   5   2   6 303.222 75.1500   6
  -5  -2  -6 286.663 60.7158   6
   5   2   6 283.219 138.453   4
  -5  -2  -7 578.420 92.7312   6
   5   2   7 518.696 104.595   6
  -5  -2  -8 376.513 81.0434   6
   5   2   8 280.102 78.0206   6
   5   2   9 993.390 162.584   6
  -5  -2  -9 1046.25 139.474   6
   5   2  10 142.246 60.1289   6
  -5  -2 -10 131.486 58.2232   6
  -5  -2 -10 77.0930 38.3363   2
  -5  -2 -11 111.280 55.5926   6
  -5  -2 -11 106.119 35.7311   2
  -5  -2 -12 68.5897 56.0304   6
  -5  -2 -12 39.5138 44.0643   2
  -5  -2 -13 24.9801 44.5423   6
  -5  -2 -13 9.28676 20.2319   3
  -5  -2 -13 98.8695 52.6330   2
  -5  -2 -14 175.431 82.7968   6
  -5  -2 -14 28.4627 26.7774   2
  -5  -2 -15 51.1027 25.1743   2
  -5  -2 -16 88.5344 61.7360   2
  -5  -2 -17 165.324 81.7284   2
   5   3 -14 27.0853 35.3449   2
   5   3 -13 103.117 58.6164   2
   5   3 -12-26.0121 49.5436   2
  -5  -3  11 41.0032 38.6874   3
   5   3 -11 29.6832 41.1535   2
  -5  -3  10 600.851 132.760   3
   5   3 -10 502.985 117.409   2
  -5  -3   9 60.4194 47.3290   6
  -5  -3   9 57.2109 47.8489   3
   5   3  -9 11.4642 29.0994   2
  -5  -3   9 19.9612 20.6499   2
  -5  -3   8 35.6322 33.2195   6
  -5  -3   8 2.90519 22.8986   3
   5   3  -8-12.8429 30.2608   2
  -5  -3   8 29.0270 19.1746   2
  -5  -3   7 790.580 136.813   3
  -5  -3   7 762.794 124.805   6
  -5  -3   7 674.172 99.5880   2
   5   3  -7 660.679 109.081   2
  -5  -3   6 895.782 142.088   3
  -5  -3   6 733.814 111.250   6
  -5  -3   6 774.576 97.3541   2
  -5  -3   5 178.958 60.3028   3
  -5  -3   5 166.126 42.8197   6
  -5  -3   5 94.0419 56.9118   5
   5   3  -5 146.480 52.6653   2
  -5  -3   5 134.036 37.6998   2
  -5  -3   4 75.8299 42.7743   3
  -5  -3   4 130.516 37.9967   6
  -5  -3   4 112.843 67.6042   5
   5   3  -4 125.564 43.8403   2
  -5  -3   4 150.882 61.1774   1
  -5  -3   4 98.7990 30.7457   2
  -5  -3   3 1207.24 156.545   3
   5   3  -3 1050.19 112.472   2
  -5  -3   3 1138.77 93.0501   6
  -5  -3   3 928.098 187.880   5
  -5  -3   3 1047.73 145.801   1
  -5  -3   3 1029.32 94.2503   2
  -5  -3   2 7272.03 383.633   3
   5   3  -2 6232.41 293.895   1
  -5  -3   2 6402.47 469.214   5
  -5  -3   2 6755.74 357.164   1
  -5  -3   2 6350.74 227.061   2
  -5  -3   2 6160.13 174.095   6
   5   3  -1 3314.69 209.392   1
  -5  -3   1 3398.22 328.870   5
  -5  -3   1 3611.50 243.419   1
  -5  -3   1 3362.39 162.889   2
  -5  -3   1 4025.00 287.612   3
   5   3   0 329.524 66.2147   1
  -5  -3   0 299.827 93.7947   5
  -5  -3   0 270.169 44.4764   2
   5   3   0 282.739 81.1354   5
  -5  -3   0 278.721 65.1613   1
  -5  -3  -1 2151.84 137.267   2
   5   3   1 2031.51 158.503   1
  -5  -3  -1 2035.24 237.765   5
   5   3   1 2078.33 224.685   5
  -5  -3  -1 1919.98 188.727   4
   5   3   2 6336.35 397.143   5
   5   3   2 6756.35 279.070   1
   5   3   3 1689.45 126.123   6
  -5  -3  -3 1850.38 96.1498   6
   5   3   3 1716.96 207.296   5
   5   3   3 1841.53 147.228   1
   5   3   3 1809.03 203.478   4
   5   3   4 676.635 86.0810   6
  -5  -3  -4 785.009 75.0811   6
   5   3   4 627.797 124.904   5
   5   3   4 800.876 92.4953   1
   5   3   4 626.520 138.182   4
   5   3   5 5110.64 256.855   6
  -5  -3  -5 5255.53 221.112   6
   5   3   5 5344.57 456.131   4
   5   3   6 2751.14 204.827   6
  -5  -3  -6 2542.10 170.588   6
   5   3   7 766.805 118.552   6
  -5  -3  -7 759.584 100.631   6
   5   3   8 501.736 105.065   6
  -5  -3  -8 517.838 89.7807   6
   5   3   9 1985.71 218.513   6
  -5  -3  -9 2024.30 192.762   6
  -5  -3  -9 1962.82 182.061   2
   5   3  10 26.7347 18.7520   6
  -5  -3 -10 54.4052 39.4316   6
  -5  -3 -10-1.41265 35.6002   2
  -5  -3 -11 42.9797 48.7408   6
  -5  -3 -11-23.8525 36.8627   2
  -5  -3 -12 1414.98 183.464   2
  -5  -3 -13 24.1274 39.4146   2
  -5  -3 -14 97.2088 48.5842   2
  -5  -3 -15 238.255 83.7030   2
  -5  -3 -16 260.504 91.5059   2
  -5  -3 -17 384.006 117.115   2
   5   4 -13 65.7931 52.4849   2
   5   4 -12 9.58867 22.5818   2
  -5  -4  11 141.615 67.6250   3
   5   4 -11-7.27563 17.4592   2
  -5  -4  10 971.796 170.811   3
   5   4 -10 738.131 134.393   2
  -5  -4   9 1717.05 220.129   3
  -5  -4   9 1518.66 220.369   6
   5   4  -9 1634.29 186.892   2
  -5  -4   8 2064.05 233.984   3
  -5  -4   8 1606.89 209.831   6
   5   4  -8 1712.30 180.325   2
  -5  -4   7 327.076 93.0296   6
  -5  -4   7 355.543 96.7664   3
  -5  -4   6 205.433 63.6194   6
  -5  -4   6 220.946 50.7827   2
  -5  -4   6 283.748 77.5248   3
  -5  -4   5 501.431 109.485   3
  -5  -4   5 464.261 85.3483   6
  -5  -4   5 465.947 66.7554   2
  -5  -4   5 444.966 144.660   5
   5   4  -5 500.226 83.0770   2
  -5  -4   4 821.819 137.099   3
   5   4  -4 729.849 91.9471   2
  -5  -4   4 712.126 96.7199   6
  -5  -4   4 679.492 123.103   1
  -5  -4   4 670.393 73.3721   2
  -5  -4   4 717.117 177.188   5
  -5  -4   3 393.464 63.9537   6
  -5  -4   3 529.985 111.462   3
   5   4  -3 495.569 68.5919   2
  -5  -4   3 456.557 54.0112   2
  -5  -4   3 391.442 90.2413   1
  -5  -4   3 441.722 139.516   5
  -5  -4   2 4503.20 416.895   5
  -5  -4   2 4887.26 304.014   1
  -5  -4   2 4578.49 158.799   2
  -5  -4   1 4617.75 413.488   5
  -5  -4   1 5303.65 301.283   1
  -5  -4   1 4728.95 156.327   2
  -5  -4   0 8077.46 526.463   5
  -5  -4   0 8607.22 357.961   1
  -5  -4   0 7837.23 205.622   2
   5   4   0 7823.82 304.211   1
  -5  -4  -1-6.43788 17.7875   1
  -5  -4  -1 12.4972 11.6153   2
   5   4   1-14.0960 26.0109   1
  -5  -4  -1 10.1666 12.1943   4
   5   4   2 36562.6 1024.79   5
   5   4   2 38677.9 635.373   1
   5   4   3 7042.64 202.925   6
   5   4   3 6800.00 265.361   1
   5   4   3 7030.66 450.666   5
   5   4   4 1627.00 114.910   6
   5   4   4 1400.31 200.783   5
   5   4   4 1823.27 134.593   1
   5   4   4 1472.56 179.741   4
   5   4   5 1463.05 125.027   6
   5   4   5 1726.64 127.312   1
   5   4   5 1507.26 232.381   4
   5   4   6 163.750 46.5775   6
   5   4   7 403.419 81.0435   6
  -5  -4  -7 316.521 62.6373   2
   5   4   8 2768.47 225.957   6
  -5  -4  -8 2684.34 197.230   2
   5   4   9 247.118 74.9687   6
  -5  -4  -9 239.710 64.0118   2
   5   4  10 61.8318 40.3194   6
  -5  -4 -10 60.6407 35.1082   2
  -5  -4 -11 7.89464 22.1718   2
  -5  -4 -12 1637.43 187.210   2
  -5  -4 -13 220.431 74.9046   2
  -5  -4 -14-17.6330 36.3620   2
  -5  -4 -15 561.699 125.407   2
  -5  -4 -16 466.642 123.290   2
  -5  -4 -17 236.831 94.1571   2
  -5  -5  12 24.9098 46.2726   3
   5   5 -12 15.3574 24.2448   2
  -5  -5  11-20.2707 21.2585   3
   5   5 -11-1.91260 23.0615   2
  -5  -5  10 590.058 140.085   3
   5   5 -10 455.183 101.624   2
  -5  -5   9 78.3615 52.6341   3
   5   5  -9 3.93248 17.6269   2
  -5  -5   8 149.746 71.1684   6
  -5  -5   8 135.303 66.6094   3
   5   5  -8 73.4447 31.3934   2
  -5  -5   7 284.843 91.4381   6
  -5  -5   7 349.164 95.6435   3
  -5  -5   6 141.381 58.9175   6
  -5  -5   6 231.621 72.0820   3
   5   5  -6 186.128 52.2759   2
   5   5  -5 50.1303 24.9767   2
  -5  -5   5 10.9019 32.6737   3
  -5  -5   5 50.3778 37.7876   6
  -5  -5   4 321.016 79.4126   1
  -5  -5   4 394.075 136.659   5
  -5  -5   4 416.231 100.610   3
  -5  -5   4 338.727 74.8133   6
   5   5  -4 380.043 62.0993   2
  -5  -5   3 7.99768 17.8723   1
  -5  -5   3-31.5245 52.9177   3
  -5  -5   3 5.03109 36.5989   5
   5   5  -3-1.46047 9.97938   2
  -5  -5   2 7784.97 385.801   1
  -5  -5   2 7157.65 161.036   2
  -5  -5   2 7470.13 560.984   5
  -5  -5   2 8714.19 498.436   3
  -5  -5   1-10.1061 27.4127   1
  -5  -5   1 79.3209 52.8823   5
   5   5  -1 56.2495 49.9456   5
  -5  -5   0 131.232 78.8341   5
  -5  -5   0 23.7173 21.9756   1
  -5  -5  -1 166.171 82.1466   5
  -5  -5  -1 75.9357 15.0430   2
  -5  -5  -1 143.970 49.2043   1
  -5  -5  -2 2923.47 185.973   1
   5   5   3 2936.32 114.823   6
   5   5   3 3263.52 168.846   1
  -5  -5  -3 2938.90 125.787   2
   5   5   4 2048.65 118.341   6
   5   5   4 2124.23 129.905   1
  -5  -5  -4 2204.49 122.443   2
   5   5   4 1997.35 158.419   4
   5   5   5 5149.50 217.819   6
   5   5   5 5419.23 204.274   1
  -5  -5  -5 5477.47 218.330   2
   5   5   6 80.9155 32.3760   6
  -5  -5  -6 97.9213 34.9911   2
   5   5   6 81.8907 25.5949   1
   5   5   7 1035.15 120.349   6
  -5  -5  -7 978.500 109.622   2
   5   5   7 988.391 84.5486   1
   5   5   8 4029.56 257.754   6
  -5  -5  -8 4193.94 238.120   2
  -5  -5  -9 318.662 72.0208   2
   5   5   9 286.020 74.2890   6
   5   5  10 410.211 100.005   6
  -5  -5 -10 496.718 91.1410   2
  -5  -5 -11 50.0819 32.7996   2
  -5  -5 -12 592.844 111.209   2
  -5  -5 -13 1111.77 162.527   2
  -5  -5 -14 393.977 101.940   2
  -5  -5 -15 559.900 125.218   2
  -5  -5 -16 752.923 153.385   2
  -5  -5 -17 196.575 84.4229   2
  -5  -6  11-35.8095 38.9704   3
  -5  -6  10 46.6928 26.5089   3
   5   6 -10 58.0388 34.4257   2
   5   6  -9 184.403 59.1622   2
  -5  -6   9 232.312 88.7882   3
  -5  -6   8 49.4248 45.2535   6
  -5  -6   8-12.0790 40.2718   3
   5   6  -8 33.1040 25.1865   2
  -5  -6   7 376.604 103.052   6
  -5  -6   7 298.566 89.5966   3
  -5  -6   6 1013.94 170.052   3
   5   6  -6 1021.09 114.462   2
  -5  -6   5 58.7482 37.4286   3
   5   6  -5 92.7422 30.3160   6
   5   6  -5 58.9497 29.3681   2
   5   6  -4 642.095 81.7172   6
  -5  -6   4 813.296 156.078   3
   5   6  -4 691.638 77.4439   2
  -5  -6   3 479.942 97.6156   1
  -5  -6   3 676.761 144.647   3
   5   6  -3 544.211 66.2114   6
  -5  -6   3 456.600 162.688   5
   5   6  -3 560.303 53.6448   2
   5   6  -2 1653.05 100.490   6
  -5  -6   2 1673.64 175.730   1
  -5  -6   2 1684.51 285.314   5
   5   6  -2 1590.25 254.337   5
  -5  -6   2 2069.49 260.871   3
   5   6  -1 257.163 33.6457   6
  -5  -6   1 300.864 75.4522   1
  -5  -6   1 247.541 106.305   5
   5   6  -1 142.363 70.4958   5
   5   6   0 370.887 33.4301   6
  -5  -6   0 373.729 79.6263   1
  -5  -6   0 377.097 132.501   5
   5   6   0 438.534 132.778   5
  -5  -6   0 346.421 60.5602   4
   5   6   1 9.32028 5.87581   6
  -5  -6  -1 37.0915 25.3580   5
   5   6   1 8.66280 47.7559   5
  -5  -6  -1 13.1937 14.2415   1
  -5  -6  -2 7.44358 18.6177   1
   5   6   3 584.848 55.2527   6
  -5  -6  -3 619.021 50.0098   2
  -5  -6  -3 511.882 74.3740   1
   5   6   4 3282.90 151.021   6
  -5  -6  -4 3567.65 143.450   2
   5   6   5 30.1935 13.9710   6
  -5  -6  -5 29.5854 20.6082   2
   5   6   6 2757.36 175.768   6
   5   6   6 2841.18 116.636   1
  -5  -6  -6 2720.95 160.951   2
   5   6   7 48.4549 24.4255   6
  -5  -6  -7 30.0083 24.6509   2
   5   6   7 29.2113 12.6607   1
   5   6   8 1217.15 137.784   6
   5   6   8 1332.41 70.9472   1
  -5  -6  -8 1246.00 128.372   2
   5   6   9 36.3596 27.5958   6
   5   6   9 76.3743 17.7882   1
  -5  -6  -9 10.2568 16.4003   2
   5   6  10 63.5332 37.7579   6
  -5  -6 -10 85.0293 35.0465   2
  -5  -6 -11 107.898 46.0548   2
  -5  -6 -12-32.0033 36.2344   2
  -5  -6 -13 152.549 54.6299   2
  -5  -6 -14 1650.02 207.308   2
  -5  -6 -15 234.315 81.7562   2
  -5  -6 -16 146.704 75.7329   2
  -5  -6 -17 137.746 77.5802   2
  -5  -7  11 31.7805 45.3349   3
  -5  -7  10-7.44508 19.4416   3
  -5  -7   9 41.9530 44.6124   3
   5   7  -9 13.0037 14.9713   2
  -5  -7   8 27.1168 38.6380   3
  -5  -7   7 240.758 85.0007   3
   5   7  -7 195.934 59.1352   6
  -5  -7   6 98.6227 61.3416   3
   5   7  -6 31.4718 25.9996   6
   5   7  -6 26.1540 17.6213   2
  -5  -7   5-11.9176 33.1088   3
   5   7  -5-11.1164 22.4369   2
  -5  -7   4 58.3594 50.0689   3
   5   7  -4 21.6528 15.5990   6
   5   7  -4 45.3660 17.3004   2
   5   7  -3 2214.12 148.500   6
  -5  -7   3 3141.57 335.779   3
   5   7  -2 631.219 72.9604   6
  -5  -7   2 640.151 105.447   1
   5   7  -2 673.369 175.415   5
  -5  -7   2 854.501 187.617   4
   5   7  -1 1105.76 89.7358   6
  -5  -7   1 1148.46 138.660   1
  -5  -7   1 1583.44 288.593   5
   5   7  -1 1048.94 212.878   5
  -5  -7   1 1069.23 163.194   4
  -5  -7   0 56.3606 30.2248   1
   5   7   0 39.8727 20.0179   6
  -5  -7   0 62.3463 55.4846   5
   5   7   0 79.5924 69.3016   5
  -5  -7   0 51.6524 30.5486   4
   5   7   1 1200.58 103.797   6
  -5  -7  -1 1191.04 131.858   1
  -5  -7  -1 1331.46 248.146   5
   5   7   1 1118.71 221.400   5
  -5  -7  -2 2524.85 182.848   1
   5   7   2 2085.95 288.707   5
  -5  -7  -3 451.956 70.3037   1
   5   7   3 294.045 90.0074   5
  -5  -7  -3 476.106 42.4536   2
   5   7   4 1341.83 229.624   5
  -5  -7  -4 1376.65 89.7715   2
  -5  -7  -4 1442.02 113.038   1
   5   7   5 78.6217 71.0084   5
  -5  -7  -5 72.3933 25.8648   2
   5   7   6 3.41215 13.4471   6
  -5  -7  -6 20.6416 17.7758   2
   5   7   7 239.125 56.4218   6
  -5  -7  -7 226.594 51.8573   2
   5   7   8 4922.83 276.099   6
  -5  -7  -8 5064.58 260.719   2
   5   7   9 280.509 71.8239   6
  -5  -7  -9 307.606 72.2089   2
   5   7  10 165.242 55.8910   6
  -5  -7 -10 96.1880 49.7076   2
  -5  -7 -11 2257.81 208.230   2
  -5  -7 -12 321.949 86.3096   2
   5   7  13-8.39922 7.02122   1
  -5  -7 -13 5.10330 21.9829   2
  -5  -7 -14 50.2407 40.9984   2
  -5  -7 -15 323.431 97.4477   2
  -5  -7 -16 47.2822 26.7436   2
  -5  -7 -17-21.5872 47.3608   2
  -5  -8  10 96.6987 66.1230   3
  -5  -8   9 240.813 91.2847   3
  -5  -8   8 48.7900 59.1195   3
   5   8  -8 95.4245 49.5216   6
  -5  -8   7-2.74650 24.7961   3
   5   8  -7 22.8700 19.0082   2
   5   8  -7 31.1871 22.0315   6
   5   8  -6-3.68970 17.1871   2
   5   8  -6-4.65854 20.8002   6
  -5  -8   5 390.406 116.359   3
   5   8  -5 338.914 52.9647   2
  -5  -8   4 2940.66 329.763   3
  -5  -8   4 2803.95 442.677   4
   5   8  -4 2884.86 118.342   2
   5   8  -3 6096.92 272.174   6
  -5  -8   3 5986.32 566.599   4
   5   8  -2 58.7829 25.6878   6
  -5  -8   2 31.7397 26.1079   1
  -5  -8   2 13.1303 41.9957   4
   5   8  -1 309.005 61.3767   6
   5   8  -1 345.504 131.585   5
  -5  -8   1 234.411 90.0955   4
  -5  -8   1 277.137 65.9612   1
   5   8   0 518.477 79.0037   6
  -5  -8   0 574.000 92.6751   1
  -5  -8   0 294.256 124.192   5
   5   8   0 603.353 165.838   5
  -5  -8   0 405.141 96.2706   4
   5   8   1 2811.22 199.845   6
  -5  -8  -1 3126.30 215.199   1
  -5  -8  -1 2893.70 391.897   5
   5   8   1 2942.66 371.453   5
  -5  -8  -2 3240.37 210.654   1
   5   8   2 2379.00 327.665   5
  -5  -8  -3 4893.55 114.098   2
  -5  -8  -3 5818.87 264.137   1
   5   8   3 5165.38 476.213   5
   5   8   4 116.507 53.3160   5
  -5  -8  -4 292.347 45.2469   2
  -5  -8  -4 251.697 50.8581   1
   5   8   5 4100.57 436.223   5
  -5  -8  -5 3945.28 165.046   1
  -5  -8  -5 3938.45 181.966   2
   5   8   5 3482.49 255.037   4
   5   8   6 504.278 158.142   5
  -5  -8  -6 443.563 67.8922   2
  -5  -8  -7 526.497 79.6677   2
   5   8   8 730.958 109.162   6
  -5  -8  -8 763.785 102.996   2
   5   8   9 387.631 84.5138   6
  -5  -8  -9 346.605 73.0056   2
   5   8  10-17.4568 30.9049   6
  -5  -8 -10-14.3095 28.5999   2
  -5  -8 -11 1117.86 149.318   2
  -5  -8 -12 141.597 52.4505   2
  -5  -8 -13 24.5218 32.5847   2
  -5  -8 -14-81.9308 49.3699   2
  -5  -8 -15 457.373 114.318   2
  -5  -8 -16 272.696 92.8232   2
  -5  -8 -17 448.858 130.248   2
  -5  -9   9 35.8863 41.8721   3
   5   9  -9 34.8117 32.3116   6
  -5  -9   8 22.0581 26.0187   3
   5   9  -8 33.1264 29.8345   6
  -5  -9   7 281.772 96.9727   3
   5   9  -7 263.103 74.7307   6
  -5  -9   6 3.42347 24.8414   3
   5   9  -6-0.65383 29.0573   6
  -5  -9   5-19.3703 32.1529   3
   5   9  -5-28.7829 27.7411   6
   5   9  -5 13.5161 12.4527   2
  -5  -9   5-74.6809 86.2152   4
  -5  -9   4 60.1807 64.1270   3
  -5  -9   4 78.7652 75.0842   4
  -5  -9   3 208.304 89.7875   3
  -5  -9   3 190.829 92.6912   4
   5   9  -2 701.932 104.013   6
   5   9  -2 594.189 181.701   5
  -5  -9   2 434.518 142.828   4
   5   9  -1 926.950 119.483   6
   5   9  -1 821.925 202.493   5
  -5  -9   1 899.397 197.208   4
  -5  -9   1 631.840 100.249   1
   5   9   0 562.486 99.0200   6
  -5  -9   0 557.407 91.1128   1
   5   9   0 608.001 174.107   5
   5   9   1 468.476 91.7084   6
  -5  -9  -1 583.095 90.5059   1
   5   9   1 462.102 156.754   5
   5   9   2 98.5232 70.4017   5
  -5  -9  -2 76.7310 34.0670   1
  -5  -9  -3 375.301 69.8276   1
   5   9   3 321.572 132.422   5
  -5  -9  -4 901.618 78.4912   2
  -5  -9  -4 1110.81 110.149   1
   5   9   4 1120.83 233.400   5
   5   9   4 1156.09 154.955   4
   5   9   5 1626.87 293.816   5
  -5  -9  -5 1586.92 115.040   1
   5   9   5 1284.92 171.938   4
  -5  -9  -5 1468.30 119.423   2
  -5  -9  -6 8.13487 12.9429   2
   5   9   6-47.1828 90.8922   5
  -5  -9  -7 112.466 38.9189   2
   5   9   7 60.2395 56.6761   5
  -5  -9  -8 4.29812 22.0517   2
  -5  -9  -9 39.5685 24.6280   2
   5   9   9 47.7040 35.6880   6
  -5  -9 -10 52.4996 28.5231   2
   5   9  10 139.572 58.5399   6
  -5  -9 -11 1258.49 163.321   2
  -5  -9 -12 435.204 97.9297   2
  -5  -9 -13 723.681 137.195   2
  -5  -9 -14 517.093 119.672   2
  -5  -9 -15-0.21119 51.8397   2
  -5  -9 -16 35.5155 47.4915   2
  -5  -9 -17 141.490 75.3215   2
  -5 -10   9 29.4381 58.9140   3
   5  10  -8-42.4094 33.8085   6
  -5 -10   8 72.9196 59.6132   3
  -5 -10   7 52.4936 45.5400   3
   5  10  -7 40.4877 29.4432   6
  -5 -10   6 113.959 62.1139   3
   5  10  -6 68.1591 38.4431   6
  -5 -10   5 161.815 69.0759   3
   5  10  -5 85.9601 40.0094   6
  -5 -10   4 1150.77 214.819   3
   5  10  -4 1116.15 146.793   6
  -5 -10   3 244.790 109.700   3
   5  10  -3 107.849 46.7694   6
  -5 -10   3 267.608 135.745   4
   5  10  -2 30.6210 34.3100   5
  -5 -10   2-77.8905 71.7740   4
   5  10  -1 77.7482 73.7338   5
  -5 -10   1 127.891 68.4780   4
   5  10   0 190.722 116.692   5
  -5 -10   0 50.6977 26.5496   1
   5  10   1 492.964 102.859   6
   5  10   1 492.239 171.254   5
  -5 -10  -1 383.066 74.3805   1
  -5 -10  -2 499.525 80.3676   1
   5  10   2 380.403 144.826   5
   5  10   3-20.6692 41.5846   5
  -5 -10  -3 9.83125 11.4173   1
  -5 -10  -4 164.152 45.8358   1
   5  10   4 74.2961 53.5343   5
  -5 -10  -5 704.128 85.0281   2
  -5 -10  -5 650.984 77.6404   1
   5  10   5 384.097 145.199   5
   5  10   5 437.800 113.215   4
   5  10   6 373.309 156.716   5
  -5 -10  -6 434.562 50.1676   1
   5  10   6 461.974 129.860   4
  -5 -10  -6 481.165 78.0120   2
  -5 -10  -7 176.689 51.3669   2
   5  10   7 294.794 135.779   5
  -5 -10  -8-1.89696 13.3171   2
   5  10   8-61.7442 65.4106   5
  -5 -10  -9 5.38243 24.9080   2
  -5 -10 -10 3303.11 255.232   2
  -5 -10 -11 564.733 110.039   2
  -5 -10 -12 201.561 68.4669   2
  -5 -10 -13 84.9947 44.0426   2
  -5 -10 -14 367.847 105.937   2
  -5 -10 -15 116.619 62.6844   2
  -5 -10 -16 200.444 87.9457   2
  -5 -10 -17-47.6564 54.0201   2
  -5 -11   8 44.3708 45.3315   3
  -5 -11   7-62.1315 53.3592   3
   5  11  -7 14.0211 21.1521   6
  -5 -11   6 66.1157 53.7252   3
   5  11  -6-26.1956 27.3243   6
  -5 -11   5 15.6268 33.0274   3
   5  11  -5-4.10817 26.5854   6
  -5 -11   4-9.26363 30.0192   3
   5  11  -4 13.2606 20.6796   6
  -5 -11   3-6.50772 31.3507   3
   5  11  -3 7.25686 29.0243   6
   5  11  -2 582.933 116.498   6
   5  11  -2 607.484 182.910   5
   5  11  -1 830.478 143.505   6
   5  11  -1 717.137 214.724   5
  -5 -11   1 1015.05 230.994   4
   5  11   0 262.899 126.942   5
   5  11   1 156.840 102.021   5
   5  11   2 97.9583 81.7951   5
   5  11   3-36.4029 56.7548   5
  -5 -11  -3 9.41579 13.8909   1
  -5 -11  -4 2738.86 182.138   1
   5  11   4 2939.98 404.885   5
  -5 -11  -5 399.305 66.9151   1
   5  11   5 201.124 114.747   5
   5  11   5 208.619 72.8592   4
  -5 -11  -5 341.047 60.1092   2
   5  11   6 7.27162 40.2494   5
   5  11   6 0.83550 13.9224   2
  -5 -11  -6-0.54623 9.37200   1
  -5 -11  -6 10.5465 13.6002   2
   5  11   6-48.7409 53.0481   4
   5  11   7 78.0935 101.285   5
   5  11   7-1.53321 8.39158   2
  -5 -11  -7-41.4135 28.7047   2
   5  11   7-41.0907 53.0577   4
   5  11   8 522.595 88.7076   2
   5  11   8 698.492 216.983   5
  -5 -11  -8 654.689 108.387   2
   5  11   9 1608.07 166.012   2
  -5 -11  -9 1794.37 189.418   2
  -5 -11 -10 48.9317 36.5818   2
   5  11  10-17.6946 21.4966   2
  -5 -11 -11-17.3491 37.6183   2
  -5 -11 -12 369.156 98.8962   2
  -5 -11 -13 324.240 97.6586   2
  -5 -11 -14 270.517 89.3983   2
  -5 -11 -15 24.3760 31.8237   2
  -5 -11 -16-43.7650 41.9735   2
  -5 -11 -17 8.81632 26.9078   2
  -5 -12   7 72.6834 33.7065   3
  -5 -12   6 14.0245 30.1444   3
   5  12  -6-12.3144 21.7806   6
  -5 -12   5 132.422 82.0084   3
   5  12  -5 22.9214 27.5084   6
  -5 -12   4 72.2248 51.8451   3
   5  12  -4 17.6924 21.6627   6
  -5 -12   3 74.3312 59.0824   3
   5  12  -3 16.2329 27.4098   6
   5  12  -2-25.1469 38.8179   6
   5  12  -2 213.100 111.762   5
   5  12  -1 419.940 107.048   6
   5  12  -1 433.923 161.838   5
   5  12   0 1268.15 191.920   6
   5  12   0 1455.24 299.434   5
   5  12   1 372.123 145.697   5
   5  12   1 334.199 104.464   6
   5  12   2 343.345 154.033   5
   5  12   3 19.8780 49.7693   5
   5  12   4 615.997 60.2834   2
   5  12   4 645.252 189.268   5
  -5 -12  -4 514.196 80.5631   1
   5  12   5 90.4552 49.3794   5
   5  12   5 61.3830 23.6854   2
  -5 -12  -5 65.0354 26.7425   1
   5  12   5 32.2724 43.6263   4
  -5 -12  -6 5.74069 16.6637   1
   5  12   6 55.1337 83.2637   5
   5  12   6 22.3156 16.4925   2
   5  12   6-22.5910 40.6589   4
  -5 -12  -6-2.64431 28.6637   2
  -5 -12  -7 21.5296 9.07333   1
   5  12   7 19.0113 47.3819   5
   5  12   7 19.9769 19.3262   2
  -5 -12  -7 7.94852 16.4336   2
   5  12   8 104.343 58.4399   5
   5  12   8 65.2213 30.1713   2
  -5 -12  -8 18.3537 28.6601   2
   5  12   9-41.5047 28.6329   2
  -5 -12  -9-14.9837 34.1560   2
   5  12  10 736.637 119.833   2
  -5 -12 -10 631.611 127.206   2
  -5 -12 -11 113.849 46.5450   2
  -5 -12 -12-3.79156 32.3702   2
  -5 -12 -13-14.9531 26.1084   2
  -5 -12 -14 74.8313 41.1953   2
  -5 -12 -15 113.936 77.1619   2
  -5 -12 -16 42.0002 39.3937   2
  -5 -12 -17-37.7766 43.1296   2
  -5 -13   6-87.4829 61.8923   3
  -5 -13   5 17.8680 32.4400   3
  -5 -13   4-73.7073 60.2076   3
   5  13  -4 9.11608 20.2020   6
  -5 -13   3 93.0222 82.3937   3
   5  13  -3 81.0476 45.8708   6
   5  13  -2 390.463 109.373   6
   5  13  -2 303.974 173.231   5
   5  13  -1 200.102 70.6036   6
   5  13  -1 223.438 124.670   5
   5  13   0 949.971 174.115   6
   5  13   0 645.544 204.541   5
   5  13   1 40.8414 44.0766   6
   5  13   1 12.5451 55.2051   5
   5  13   2 98.6294 87.9035   5
   5  13   3 11.5313 46.9509   5
   5  13   4 215.275 122.618   5
   5  13   5-39.4140 43.6156   5
   5  13   5 40.0152 18.2567   2
  -5 -13  -5 44.4602 24.0069   1
   5  13   6-83.0963 84.1895   5
   5  13   6 43.0737 24.0239   2
   5  13   7 230.270 127.645   5
   5  13   7 166.118 46.6507   2
  -5 -13  -7 211.815 64.5973   2
   5  13   8 486.327 199.590   5
   5  13   8 257.705 68.0128   2
  -5 -13  -8 279.384 79.3133   2
   5  13   8 467.209 200.829   4
   5  13   9 355.627 82.0644   2
  -5 -13  -9 371.579 98.1265   2
   5  13   9 545.809 212.528   4
   5  13  10 261.256 160.751   5
  -5 -13 -10 30.4537 29.8305   2
  -5 -13 -11 22.8773 29.9708   2
  -5 -13 -12 53.1548 50.3553   2
  -5 -13 -13 30.8787 35.0897   2
  -5 -13 -14 17.0132 33.9139   2
  -5 -13 -15 462.317 129.042   2
  -5 -13 -16 268.103 100.325   2
  -5 -14   5-42.1494 47.0228   3
  -5 -14   4 81.5593 55.9347   3
  -5 -14   3-11.5784 52.6582   3
   5  14  -3 99.7346 58.3349   6
   5  14  -2-4.40343 23.5571   6
   5  14  -2 89.5418 86.9793   5
   5  14  -1 223.973 88.8320   6
   5  14  -1 387.800 164.855   5
   5  14   0 36.5657 36.4981   6
   5  14   0-83.9403 81.7985   5
   5  14   1-21.8069 73.3491   5
   5  14   1-17.7025 28.5798   6
   5  14   2-134.025 105.027   5
   5  14   3-112.045 96.0722   5
   5  14   4-53.5036 66.0064   5
   5  14   5-76.9658 81.7207   5
   5  14   6 176.538 152.880   5
  -5 -14  -7 174.743 54.2950   2
   5  14   7 61.1344 76.6549   5
   5  14   7 192.449 155.235   4
   5  14   8 87.9270 58.4345   5
   5  14   8 157.677 113.489   4
  -5 -14  -8 32.0272 36.5477   2
   5  14   9 73.8606 68.8374   5
  -5 -14  -9 3.71851 19.0756   2
  -5 -14 -10 5.16991 23.3489   2
   5  14  10 11.6420 91.7400   4
   5  14  11-173.074 139.838   5
  -5 -14 -11 41.3806 29.9996   2
  -5 -14 -12 48.3798 42.5128   2
  -5 -14 -13 15.7110 29.0706   2
  -5 -14 -14 36.5148 49.9529   2
  -5 -14 -15-51.4344 47.7384   2
  -5 -14 -16 60.7427 19.6659   2
  -5 -15   3-22.1378 41.0655   3
  -5 -15   2 32.6780 45.5113   3
   5  15  -1 139.313 72.4713   6
   5  15  -1 219.752 135.054   5
   5  15   0-86.5894 59.7831   6
   5  15   0 95.8943 80.6597   5
   5  15   1 34.7866 39.1152   6
   5  15   1-99.4433 93.0173   5
   5  15   2-100.573 66.7288   6
   5  15   2 74.9206 84.8523   5
   5  15   3 195.450 151.822   5
   5  15   4-99.3533 96.2590   5
   5  15   5-79.0323 86.5688   5
   5  15   6 193.678 144.985   5
   5  15   6 407.109 179.570   4
   5  15   7 249.181 151.513   5
   5  15   7 208.704 122.833   4
   5  15   8 129.058 113.210   5
   5  15   8 270.571 147.018   4
   5  15   9 293.865 170.248   5
   5  15   9 123.422 112.202   4
  -5 -15  -9 72.2007 49.1466   2
   5  15  10-23.5698 76.0417   5
   5  15  10-64.3790 82.4216   4
  -5 -15 -10 73.2965 48.4560   2
   5  15  11-335.195 185.553   4
  -5 -15 -11-50.0133 43.0699   2
   5  15  12-30.7110 70.6928   5
  -5 -15 -12 143.477 70.3039   2
  -5 -15 -13-47.9328 43.9908   2
  -5 -15 -14-6.42656 22.7100   2
  -5 -15 -15 41.1903 24.5255   2
  -5 -15 -16 7.56081 25.0823   2
   5  16   1 33.3289 25.9683   6
   5  16   1 75.4531 83.2508   5
   5  16   2 90.2326 64.3196   6
   5  16   2 26.9073 52.8751   5
   5  16   3 132.414 134.212   5
   5  16   4-173.703 128.567   5
   5  16   5-26.2139 62.6416   5
   5  16   6 218.638 135.095   5
   5  16   7-0.63476 43.2914   5
   5  16   8-169.674 131.603   5
   5  16   9 164.534 134.471   5
   5  16  10-51.9422 87.7821   5
  -5 -16 -14 54.8461 50.2278   2
   5  17   3 24.2864 40.2008   6
   6 -12  -6 5.12888 41.4018   1
   6 -12  -5 83.1080 61.2613   1
   6 -11  -9 43.5607 45.0509   1
   6 -11  -8-6.83887 28.4454   1
   6 -11  -7 58.5171 60.3282   1
   6 -11  -6 5.05104 47.0588   1
   6 -11  -5 199.036 96.3400   1
  -6  11   4-14.8981 52.8335   4
  -6  11   3 37.1700 94.1352   4
  -6  11   2 482.533 286.438   4
  -6  11   1-25.4793 81.7488   4
  -6  11   0-11.7270 87.8191   4
  -6  11  -1 249.238 170.309   6
  -6  11  -1 72.7291 135.543   4
  -6  11  -2-68.1001 80.8312   6
   6 -10 -10-82.9093 56.4146   1
   6 -10  -9-4.16575 31.3779   1
   6 -10  -8-82.4496 55.9222   1
   6 -10  -7 92.0321 62.1486   1
  -6  10   7-22.2095 100.144   4
  -6  10   6-1.27426 223.653   4
   6 -10  -6-24.0086 50.6324   1
   6 -10  -5 404.890 129.976   1
  -6  10   5 284.804 234.142   4
   6 -10  -4 57.9283 67.0650   1
  -6  10   4 249.722 247.016   4
  -6  10   3 419.585 265.770   4
  -6  10   2-132.393 154.330   4
  -6  10   1 443.827 306.712   4
  -6  10   0 171.996 173.931   4
  -6  10  -1-90.0899 133.352   4
  -6  10  -2 104.961 95.7498   6
  -6  10  -2-270.071 228.768   4
  -6  10  -3 304.994 138.318   6
  -6  10  -4 415.995 171.511   6
  -6  10  -5 25.9106 54.1589   6
   6  -9 -11 38.6038 39.8525   1
   6  -9 -10 52.1105 32.5681   1
   6  -9  -9 23.8236 34.1016   1
  -6   9   9-49.4277 116.593   4
  -6   9   8 435.225 280.751   4
   6  -9  -8 42.6701 47.7206   1
   6  -9  -7 19.3109 53.8872   1
  -6   9   7-358.577 253.483   4
   6  -9  -6 47.0580 52.8774   1
  -6   9   6 205.000 198.386   4
   6  -9  -5 451.143 126.144   1
  -6   9   5 350.013 279.548   4
  -6   9   4-3.43679 82.0373   4
   6  -9  -4 57.2614 44.6171   1
  -6   9   3 444.859 266.867   4
  -6   9   2 38.1992 179.283   4
  -6   9   1-37.0852 97.6687   4
  -6   9   0 255.046 192.277   4
  -6   9  -1 0.98225 107.754   4
  -6   9  -2 550.976 184.260   6
  -6   9  -2 548.556 318.090   4
  -6   9  -3 735.126 212.865   6
  -6   9  -3 601.862 314.444   4
  -6   9  -4 396.945 161.219   6
  -6   9  -5-70.9727 45.6556   6
  -6   9  -6 198.606 92.6471   6
  -6   9  -7-144.431 95.1758   6
   6  -8 -12 55.1454 45.2248   1
   6  -8 -11-36.0302 40.9135   1
   6  -8 -10 35.1186 24.5116   2
   6  -8 -10 7.11325 26.5028   1
   6  -8  -9-11.6891 29.5486   2
   6  -8  -9-26.0893 39.8184   1
   6  -8  -8 165.170 70.3290   1
  -6   8   7 536.165 362.303   4
   6  -8  -7 347.181 107.334   1
   6  -8  -6 214.689 84.7524   1
  -6   8   6 482.968 334.132   4
   6  -8  -5 170.139 87.5528   1
  -6   8   5 377.226 266.548   4
   6  -8  -4 112.529 62.4235   1
  -6   8   4 306.471 224.849   4
  -6   8   3-214.208 197.051   4
  -6   8   2 496.505 241.043   4
  -6   8   1 65.5244 119.851   4
  -6   8   0 138.234 153.675   4
  -6   8  -1-72.8512 115.400   4
  -6   8  -2 348.876 258.233   4
  -6   8  -2-41.7184 59.5758   6
  -6   8  -3-4.10831 40.1281   6
  -6   8  -3 6.16801 81.1452   4
  -6   8  -4 58.8136 47.0917   6
  -6   8  -5-62.0863 64.6148   6
  -6   8  -6 170.738 99.0998   6
  -6   8  -7 23.0258 48.7014   6
  -6   8  -8-75.3772 77.2774   6
   6  -7 -11 12.5276 38.6187   1
   6  -7 -11-129.622 80.0706   2
   6  -7 -10 14.3208 39.1073   1
   6  -7 -10-121.431 75.7439   2
   6  -7  -9-63.2754 56.5025   2
   6  -7  -9 37.7685 42.5528   1
   6  -7  -8-23.6855 45.1558   1
   6  -7  -8 44.2293 22.7041   2
   6  -7  -7 91.4841 57.4526   1
   6  -7  -6 1729.69 225.855   1
  -6   7   6 1848.15 524.634   4
   6  -7  -5 161.715 56.3812   3
  -6   7   5 133.429 153.475   4
   6  -7  -5 153.433 66.0527   1
   6  -7  -4-76.0457 60.1250   1
   6  -7  -4 42.1210 29.4788   3
  -6   7   4-83.6360 97.7449   4
   6  -7  -3 1.66909 20.3556   3
  -6   7   3 9.85357 43.9665   5
   6  -7  -2 82.3673 34.4975   3
  -6   7   2 121.032 30.3753   5
  -6   7   2 72.6381 210.037   4
  -6   7   1 34.6902 121.385   4
  -6   7   0 407.202 249.704   4
  -6   7  -1 1446.40 404.533   4
  -6   7  -2 1630.71 303.228   6
  -6   7  -2 1439.83 431.308   4
  -6   7  -3 1450.47 279.045   6
  -6   7  -3 1087.55 414.344   4
  -6   7  -4-19.7567 58.9186   6
  -6   7  -5 597.635 173.221   6
  -6   7  -6-75.6797 78.0825   6
  -6   7  -7 62.6277 40.5276   6
  -6   7  -8 25.3368 38.8941   6
  -6   7  -9-17.3520 52.7757   6
  -6   7 -10 81.7442 75.7083   6
   6  -6 -12 217.821 112.978   2
   6  -6 -11 7.69364 21.3312   1
   6  -6 -11 4.41131 23.5252   2
   6  -6 -10 36.0990 47.2403   1
   6  -6 -10 36.9716 41.7420   2
   6  -6  -9 183.465 82.5048   2
   6  -6  -9 176.121 74.5594   1
   6  -6  -8 14.5293 32.7140   2
   6  -6  -8 79.5409 48.4418   1
   6  -6  -7 137.666 72.0559   2
   6  -6  -7 57.4664 43.6727   1
   6  -6  -6 3030.39 291.892   1
   6  -6  -5 147.321 53.9720   3
   6  -6  -5 114.064 57.4688   1
  -6   6   5 169.258 153.811   4
   6  -6  -4 701.978 118.012   3
   6  -6  -4 805.574 150.890   1
  -6   6   4 707.042 328.724   4
   6  -6  -3 428.161 87.1022   3
   6  -6  -3 683.649 140.453   1
  -6   6   2-5.37935 25.0101   5
   6  -6  -2 29.1106 20.1597   3
  -6   6   1-48.2242 137.871   4
  -6   6   0 8.78324 103.623   4
  -6   6  -1 1367.79 388.543   4
  -6   6  -2 1959.21 313.880   6
  -6   6  -2 1486.15 414.287   4
  -6   6  -3 1803.78 304.480   6
  -6   6  -3 2548.14 576.609   4
  -6   6  -4 2630.58 346.653   6
  -6   6  -5 2879.48 362.305   6
  -6   6  -6 535.442 150.059   6
  -6   6  -7 25.5306 45.8304   6
  -6   6  -8 90.8007 74.9719   6
  -6   6  -9-36.4325 63.2565   6
  -6   6 -10 197.947 93.0774   6
  -6   6 -11 9.54280 32.0591   6
   6  -5 -12-73.4246 62.1055   2
   6  -5 -11 0.30360 26.6543   2
   6  -5 -10 62.9698 52.1350   1
   6  -5 -10 51.0155 46.2179   2
   6  -5  -9 83.5841 57.1841   2
   6  -5  -9 9.76486 22.9962   1
   6  -5  -8-4.78098 38.1677   1
   6  -5  -8 32.9416 18.3835   2
   6  -5  -7 45.0306 64.3694   2
   6  -5  -7 89.6160 42.0019   1
   6  -5  -6-36.6646 24.1463   2
   6  -5  -6-26.6130 38.5767   1
   6  -5  -5 566.706 112.500   3
   6  -5  -5 539.732 124.592   1
   6  -5  -4 305.016 79.9769   3
  -6   5   4 36.5034 89.0542   4
   6  -5  -4 359.355 97.1441   1
   6  -5  -3 119.740 62.4254   1
   6  -5  -3 58.9616 33.4382   3
  -6   5   3 189.044 134.131   4
   6  -5  -2-9.15396 15.4009   3
  -6   5   2 163.383 155.990   4
  -6   5   1 68.9828 149.031   4
  -6   5   0-185.304 175.066   4
  -6   5  -1 1188.31 347.393   4
  -6   5  -2 991.032 211.896   6
  -6   5  -2 1042.68 324.903   4
  -6   5  -3 22.5334 49.1599   6
  -6   5  -3 229.899 165.296   4
  -6   5  -4-42.0849 53.9943   6
  -6   5  -5 1260.20 224.919   6
  -6   5  -6 553.896 151.011   6
  -6   5  -7 59.3246 49.8952   6
  -6   5  -8 123.561 59.9026   6
  -6   5  -9-52.4395 51.0636   6
  -6   5 -10 50.4706 50.3524   6
  -6   5 -11-56.1450 32.8803   6
  -6   5 -12 12.2805 31.8338   6
   6  -4 -13 141.577 100.880   2
   6  -4 -12 46.2590 65.6988   2
   6  -4 -11 181.426 88.4099   2
   6  -4 -10-49.8322 40.3027   1
   6  -4 -10 47.2383 40.9298   2
   6  -4  -9 177.588 71.8184   1
   6  -4  -9 136.721 69.2116   2
   6  -4  -8 35.9723 45.0468   1
   6  -4  -8 13.0841 24.1882   2
   6  -4  -7 192.525 72.3550   1
   6  -4  -7 164.534 85.4867   2
   6  -4  -6 220.598 86.8661   2
   6  -4  -6 154.941 65.8557   1
   6  -4  -5 154.436 59.1935   3
   6  -4  -5 47.5743 34.4110   1
   6  -4  -4-7.58994 22.7911   3
   6  -4  -4-50.3350 39.4609   1
   6  -4  -3 34.4782 17.4573   3
   6  -4  -3 42.2241 37.9674   1
  -6   4   3 64.5469 78.7551   4
  -6   4   2 581.318 87.4719   5
  -6   4   2 675.962 296.982   4
   6  -4  -2 517.968 115.355   1
  -6   4   1 215.615 140.854   4
  -6   4   0 3422.23 580.381   4
  -6   4  -1 1021.91 304.264   4
  -6   4  -2 1427.98 233.666   6
  -6   4  -2 1065.48 317.510   4
  -6   4  -3 72.2484 68.2575   6
  -6   4  -3 584.740 242.284   4
  -6   4  -4 133.140 68.5846   6
  -6   4  -5 36.6813 42.6744   6
  -6   4  -6 120.387 67.1397   6
  -6   4  -7 225.096 86.9830   6
   6  -4   7 198.775 55.0972   5
  -6   4  -8-15.4308 28.2914   6
   6  -4   8 2.39855 46.9570   5
  -6   4  -9 278.238 92.7450   6
  -6   4 -10 255.854 98.9596   6
  -6   4 -11 53.7968 42.8568   6
  -6   4 -12-19.1727 35.9840   6
  -6   4 -13 79.9125 60.4941   6
   6  -3 -13 94.8837 89.4519   2
   6  -3 -12 34.3356 43.7864   2
   6  -3 -11-2.79009 23.9947   2
   6  -3 -10 302.642 108.512   2
   6  -3  -9 232.897 87.6046   1
   6  -3  -9 193.633 90.5909   2
   6  -3  -8 54.8292 45.6744   2
   6  -3  -8 50.2637 36.4476   1
   6  -3  -7 570.674 119.951   1
   6  -3  -7 576.161 130.966   2
   6  -3  -6 33.9506 35.2561   2
   6  -3  -6 24.6518 21.7546   1
   6  -3  -5-34.7039 66.9219   2
   6  -3  -5-24.4929 32.6182   3
   6  -3  -5 26.7808 27.2050   1
   6  -3  -4 138.766 61.6710   1
   6  -3  -4 49.6419 25.2071   3
  -6   3   3 2439.38 214.967   5
   6  -3  -3 1565.87 180.826   3
   6  -3  -2 101.892 55.9876   1
  -6   3   2 70.3882 41.8182   2
  -6   3   2 36.8476 25.5703   5
  -6   3   2-43.5120 181.477   4
  -6   3   1 17.0181 15.0973   5
   6  -3  -1 2.95320 22.8523   1
  -6   3   1 59.7697 45.4224   2
  -6   3   1 104.438 142.860   4
  -6   3   0 3766.65 349.992   2
  -6   3   0 11585.0 1022.12   4
  -6   3  -1 652.903 236.684   4
  -6   3  -1 668.625 151.205   2
  -6   3  -2 1256.36 204.338   6
  -6   3  -2 990.432 278.374   4
  -6   3  -3 857.106 173.225   6
   6  -3   3 1073.89 313.725   4
  -6   3  -4 1376.73 208.719   6
   6  -3   4 1981.53 439.949   4
  -6   3  -5-43.6124 51.1821   6
  -6   3  -6 1030.80 179.466   6
   6  -3   6 857.286 72.0970   5
  -6   3  -7 599.701 137.466   6
   6  -3   7 477.025 85.1535   5
  -6   3  -8 949.077 171.772   6
   6  -3   8 798.642 128.173   5
  -6   3  -9 358.556 107.300   6
   6  -3   9 352.185 94.4986   5
  -6   3 -10 53.2038 51.9984   6
  -6   3 -11 43.9847 51.8095   6
  -6   3 -12 273.515 93.4610   6
  -6   3 -13-0.27007 24.2675   6
  -6   3 -14 42.1544 43.3326   6
  -6   3 -14 32.0173 37.8169   2
   6  -2 -14 130.561 88.7126   2
   6  -2 -13-24.4363 36.3590   2
   6  -2 -12 39.8352 42.1830   2
   6  -2 -11 122.876 79.6208   2
   6  -2 -10 308.651 105.326   2
   6  -2  -9 198.455 87.2695   2
   6  -2  -8 574.248 120.595   1
   6  -2  -8 482.017 128.185   2
   6  -2  -7 159.316 73.9450   2
   6  -2  -7 100.593 55.5567   1
   6  -2  -6 1560.63 194.854   1
   6  -2  -6 1297.84 188.125   2
   6  -2  -5 16.9514 18.9844   2
   6  -2  -5 3.86408 35.1716   3
   6  -2  -5 40.0905 40.2022   1
   6  -2  -4-12.0939 31.1925   3
  -6   2   4-2.44123 22.1707   2
  -6   2   4-39.0168 32.9290   5
   6  -2  -4-50.8682 53.9821   1
   6  -2  -3 56.9288 35.7773   1
  -6   2   3 76.9796 43.1030   2
  -6   2   3 55.9957 31.7955   5
  -6   2   2 592.985 116.729   2
  -6   2   2 528.509 102.961   5
   6  -2  -2 424.163 99.2869   1
  -6   2   2 578.084 220.490   4
  -6   2   1 3066.89 187.616   3
  -6   2   1 3500.77 292.336   2
  -6   2   1 3319.81 229.253   5
   6  -2  -1 2740.50 243.383   1
  -6   2   1 3437.82 559.208   4
  -6   2   0 2637.76 158.672   3
  -6   2   0 2760.15 278.900   2
  -6   2   0 2371.72 124.968   5
  -6   2   0 2987.61 490.519   4
  -6   2  -1 3174.18 154.871   3
  -6   2  -1 2836.60 460.974   4
  -6   2  -2 313.950 41.2897   3
  -6   2  -2 241.780 71.8626   6
  -6   2  -2 197.409 85.7118   4
  -6   2  -3 531.548 122.923   6
   6  -2   3 450.762 180.416   4
  -6   2  -3 542.963 220.147   4
  -6   2  -4 1982.24 225.650   6
   6  -2   4 2206.68 457.972   4
  -6   2  -5 23.1426 34.6189   6
   6  -2   5-54.9808 91.6352   4
  -6   2  -6 141.874 59.3325   6
   6  -2   6 283.326 50.2441   5
   6  -2   6 387.892 204.738   4
  -6   2  -7 204.232 74.4265   6
  -6   2  -8 410.311 113.670   6
  -6   2  -8 426.558 36.5557   3
  -6   2  -9 1157.51 83.8155   3
  -6   2  -9 1188.68 183.816   6
  -6   2 -10 633.591 143.702   6
  -6   2 -11 98.2437 56.1100   6
  -6   2 -12 64.7165 50.9373   6
  -6   2 -13 52.9713 68.0820   6
  -6   2 -14 69.8505 54.5429   6
  -6   2 -14 52.6388 47.6737   2
   6  -1 -14 97.2495 89.7706   2
   6  -1 -13 0.29030 35.7633   2
   6  -1 -12-88.0864 60.6433   2
   6  -1 -11 190.630 80.7520   2
   6  -1 -10 90.0050 63.4945   2
   6  -1  -9-2.63615 26.1184   2
  -6   1   8 45.7857 45.0444   6
   6  -1  -8-35.9019 49.6072   2
  -6   1   7 126.277 48.5944   6
   6  -1  -7 134.172 59.2234   1
   6  -1  -7 169.961 71.8864   2
   6  -1  -6 1104.42 164.531   2
  -6   1   6 1015.48 148.565   2
   6  -1  -6 1083.54 160.416   1
  -6   1   5 1264.46 155.090   3
   6  -1  -5 1106.28 156.980   1
   6  -1  -5 1021.78 159.049   2
  -6   1   5 945.454 167.952   5
  -6   1   5 873.641 133.138   2
   6  -1  -5 1015.75 163.934   3
   6  -1  -4 75.7762 51.7797   2
  -6   1   4 51.3879 32.7582   2
  -6   1   4 54.3129 30.7442   3
   6  -1  -4 65.3349 34.5021   1
  -6   1   4 25.8974 17.2055   5
  -6   1   3 78.4464 36.5460   3
  -6   1   3 72.8217 37.6543   2
  -6   1   3 94.2091 48.8186   5
   6  -1  -3 31.2439 22.9789   1
   6  -1  -2-30.2411 44.6400   1
  -6   1   2 14.9316 21.9923   3
  -6   1   2 2.19069 18.0835   2
  -6   1   2 37.1035 33.6284   5
  -6   1   1 412.020 69.7124   3
  -6   1   1 471.128 101.581   5
  -6   1   1 469.228 101.911   2
  -6   1   1 553.692 207.527   4
   6  -1  -1 468.628 101.627   1
  -6   1   0 134.316 37.2969   3
   6  -1   0 127.839 55.9683   1
  -6   1   0 116.955 42.8187   5
  -6   1   0 85.7049 105.798   4
  -6   1   0 226.609 75.8216   2
  -6   1  -1 2226.00 139.113   3
  -6   1  -1 2889.45 284.215   2
  -6   1  -1 2051.78 373.258   4
  -6   1  -2 1568.81 107.405   3
  -6   1  -2 1527.65 186.216   6
  -6   1  -2 1469.54 291.399   4
  -6   1  -3 2039.41 111.737   3
  -6   1  -3 1906.47 206.140   6
   6  -1   3 1828.83 351.729   4
  -6   1  -3 1886.02 360.200   4
  -6   1  -4 89.0266 21.1247   3
  -6   1  -4 33.3556 22.9054   6
   6  -1   4-25.6553 86.2391   4
  -6   1  -5 120.936 42.3546   6
   6  -1   5 148.331 35.4839   5
   6  -1   5 202.842 132.544   4
  -6   1  -6 750.088 128.991   6
   6  -1   6 762.981 271.647   4
  -6   1  -7 2379.85 236.818   6
   6  -1   7 2434.33 468.668   4
  -6   1  -8 792.514 70.4236   3
  -6   1  -8 725.420 135.279   6
  -6   1  -9 223.474 76.7726   6
  -6   1  -9 199.866 39.2780   3
  -6   1 -10-3.21193 7.57572   3
  -6   1 -10 53.6443 39.4331   6
  -6   1 -11 486.126 121.892   6
  -6   1 -12 392.468 113.762   6
  -6   1 -13 99.1089 60.2156   6
  -6   1 -13-3.95712 28.5993   2
  -6   1 -14 21.4983 34.8220   6
  -6   1 -14 29.5141 20.9651   2
  -6   1 -15-19.7513 41.5281   6
  -6   1 -15 195.440 93.6707   2
   6   0 -14 11.3016 29.5287   2
   6   0 -13 42.3076 45.3162   2
   6   0 -12-25.7184 60.3595   2
   6   0 -11-27.4345 34.2595   2
   6   0 -10 5.12207 32.7405   2
   6   0  -9 17.7447 39.7120   2
  -6   0   8 319.640 86.7327   6
   6   0  -8 270.739 90.3896   2
  -6   0   7 1606.28 191.933   3
  -6   0   7 1621.79 179.411   6
   6   0  -7 1444.85 194.042   2
  -6   0   7 1730.20 192.706   2
  -6   0   6 89.1499 42.8302   2
  -6   0   6 158.528 62.1989   3
  -6   0   6 50.8291 29.6444   6
  -6   0   6 43.5666 22.7278   5
   6   0  -6 110.575 54.3592   1
   6   0  -6 133.731 62.2444   2
  -6   0   5 497.203 97.3920   3
  -6   0   5 542.509 99.1984   2
  -6   0   5 557.116 135.317   5
   6   0  -5 563.046 111.261   1
   6   0  -5 501.369 105.973   2
  -6   0   4 3867.93 255.691   3
   6   0  -4 4026.07 288.950   1
   6   0  -4 3645.71 286.030   2
  -6   0   4 3717.04 333.630   5
  -6   0   4 3765.33 259.098   2
  -6   0   3 924.660 121.929   3
  -6   0   3 1065.71 174.186   5
  -6   0   3 631.420 104.133   2
  -6   0   2 13.3892 12.2620   3
  -6   0   2 12.2877 13.6007   2
  -6   0   2 47.5599 43.7763   5
   6   0  -2 8.78083 23.2035   1
  -6   0   1 1331.64 152.519   2
  -6   0   1 1474.78 137.947   3
  -6   0   1 1445.86 187.507   5
   6   0  -1 1294.80 158.506   1
  -6   0   1 1530.05 307.065   4
  -6   0   0 4395.36 226.204   3
  -6   0   0 4645.00 302.146   2
  -6   0   0 4241.23 290.850   5
   6   0   0 4169.36 286.110   1
  -6   0   0 4769.07 555.070   4
  -6   0  -1 43.5069 36.0748   2
  -6   0  -1 45.2538 33.8849   6
  -6   0  -1 45.1860 30.5340   3
   6   0   1 65.8631 43.9068   1
  -6   0  -1 50.4952 90.6798   4
  -6   0  -2 596.091 80.2606   3
  -6   0  -2 660.428 107.503   6
  -6   0  -2 569.199 173.766   4
  -6   0  -3 2498.40 204.620   6
   6   0   3 2554.74 140.549   5
   6   0   3 2708.43 407.385   4
  -6   0  -3 3534.20 470.031   4
  -6   0  -3 2210.66 149.764   3
  -6   0  -4 1457.94 159.144   6
   6   0   4 1698.94 130.589   5
   6   0   4 1756.76 340.753   4
  -6   0  -5 1047.94 139.998   6
   6   0   5 910.470 115.809   5
   6   0   5 1014.06 281.989   4
  -6   0  -6 3098.69 245.175   6
   6   0   6 4051.10 559.076   4
  -6   0  -7 1518.48 173.622   6
   6   0   7 1497.34 347.995   4
   6   0   8 320.799 102.738   6
  -6   0  -8 416.683 94.1389   6
   6   0   8 504.881 208.202   4
  -6   0  -9 176.616 66.5557   6
  -6   0 -10 78.1548 51.1915   6
  -6   0 -10 40.6223 23.2022   3
  -6   0 -11 198.399 72.6103   6
  -6   0 -11 261.578 57.9415   3
  -6   0 -12 58.7639 41.2327   6
  -6   0 -13 9.13615 26.0319   6
  -6   0 -13 59.3819 52.1885   2
  -6   0 -14 187.866 83.6279   6
  -6   0 -14 194.996 74.5549   2
  -6   0 -15 112.869 65.2348   6
  -6   0 -15 19.7187 30.4996   2
  -6   0 -16-31.8397 40.5878   6
   6   1 -14 34.9539 47.4283   2
   6   1 -13 16.3203 47.5563   2
   6   1 -12-1.74459 17.1643   2
   6   1 -11 226.542 93.4498   2
   6   1 -10 550.638 129.032   2
  -6  -1   9 1014.40 169.605   3
   6   1  -9 651.514 138.162   2
  -6  -1   8 75.5642 42.3802   6
  -6  -1   8 126.379 51.2200   3
   6   1  -8 83.9188 50.5953   2
  -6  -1   7 3349.13 281.177   3
   6   1  -7 3159.83 278.594   2
  -6  -1   7 3134.93 243.049   6
  -6  -1   7 3128.80 247.344   2
  -6  -1   6 204.897 66.2452   3
  -6  -1   6 165.207 52.2554   6
  -6  -1   6 165.438 76.2836   5
   6   1  -6 214.029 68.2069   2
  -6  -1   6 153.559 51.1599   2
  -6  -1   5 31.4578 24.4226   2
  -6  -1   5-0.26806 21.1780   3
  -6  -1   5 12.6509 22.8102   6
  -6  -1   5 34.4186 39.0053   5
   6   1  -5 4.76443 23.9369   1
   6   1  -5 32.3176 22.8204   2
  -6  -1   4-22.3234 20.2283   2
  -6  -1   4 19.0672 25.5511   3
  -6  -1   4 30.6092 20.0494   6
  -6  -1   4 5.61744 18.6118   5
   6   1  -4-18.5772 36.2194   1
   6   1  -3 79.5468 39.3153   1
  -6  -1   3 100.849 44.2553   3
  -6  -1   3 126.403 45.9347   2
  -6  -1   3 174.559 77.0965   5
  -6  -1   2 734.397 107.071   3
   6   1  -2 609.099 111.808   1
  -6  -1   2 694.041 146.308   5
  -6  -1   2 626.695 97.3880   2
  -6  -1   1 198.449 54.3041   3
  -6  -1   1 96.2781 54.4344   5
  -6  -1   1 120.059 40.3023   2
   6   1  -1 119.993 54.7823   1
  -6  -1   1 121.772 53.2886   4
  -6  -1   0 1101.17 125.342   3
  -6  -1   0 883.351 118.798   2
  -6  -1   0 973.048 156.851   5
   6   1   0 1014.91 132.144   1
  -6  -1   0 1096.78 244.991   4
  -6  -1  -1 5.80435 22.2547   2
  -6  -1  -1 12.2109 19.9009   3
  -6  -1  -1 1.34496 14.4305   6
  -6  -1  -1 3.23451 32.6715   5
  -6  -1  -1-51.8318 74.5208   4
   6   1   1 17.9254 34.6488   1
  -6  -1  -2 80.1706 35.4122   6
   6   1   2 125.605 48.6568   1
   6   1   2 70.1036 31.8589   5
  -6  -1  -2 92.6336 72.3347   4
  -6  -1  -3 7592.05 308.152   6
   6   1   3 7686.32 347.356   5
  -6  -1  -3 7666.81 641.871   4
  -6  -1  -4-13.0554 17.5662   6
   6   1   4 33.3984 34.4223   5
   6   1   4 34.5474 73.1390   4
  -6  -1  -5 255.716 60.9318   6
   6   1   5 207.410 69.4109   5
   6   1   5 355.458 155.577   4
   6   1   6 3271.44 475.190   4
  -6  -1  -6 3467.26 234.670   6
  -6  -1  -7 19.6431 17.6419   6
   6   1   7 29.1508 24.4108   6
   6   1   7 54.3341 60.9156   4
   6   1   8 623.035 144.405   6
  -6  -1  -8 575.020 106.449   6
   6   1   8 289.380 165.461   4
   6   1   9 551.644 141.927   6
  -6  -1  -9 490.813 102.618   6
   6   1   9 450.345 209.293   4
  -6  -1 -10-5.84591 29.8646   6
  -6  -1 -11 0.53478 23.6054   6
  -6  -1 -12 188.856 73.9325   6
  -6  -1 -12 125.870 44.7812   3
  -6  -1 -12 156.971 61.5752   2
  -6  -1 -13 70.6290 49.0552   6
  -6  -1 -13 59.3835 49.9196   2
  -6  -1 -14 44.8702 50.2928   6
  -6  -1 -14 26.1011 30.6735   2
  -6  -1 -15-5.84386 25.7385   6
  -6  -1 -15-43.2265 46.8015   2
  -6  -1 -16-39.2916 45.8452   6
  -6  -1 -16 184.267 81.9388   2
   6   2 -13 76.5226 55.1110   2
   6   2 -12 306.133 101.177   2
   6   2 -11 180.689 80.6908   2
  -6  -2  10 100.515 51.8828   3
   6   2 -10 23.3850 26.4766   2
  -6  -2   9 332.154 98.7639   3
   6   2  -9 353.157 101.450   2
  -6  -2   8 264.660 72.8664   6
  -6  -2   8 347.544 99.9146   3
   6   2  -8 188.645 67.4473   2
  -6  -2   8 341.060 80.5856   2
  -6  -2   7 1550.58 198.065   3
   6   2  -7 1465.62 180.217   2
  -6  -2   7 1656.40 178.440   6
  -6  -2   7 1551.92 166.201   2
  -6  -2   6 75.1837 32.5044   6
  -6  -2   6-6.94793 32.7485   3
   6   2  -6 32.4985 20.9189   2
  -6  -2   6 82.6170 39.0283   2
  -6  -2   5 182.568 58.7541   3
  -6  -2   5 131.221 39.9098   6
  -6  -2   5 162.216 87.7662   5
  -6  -2   5 228.249 58.6239   2
  -6  -2   4 1140.71 148.787   3
  -6  -2   4 1109.52 105.443   6
   6   2  -4 1019.91 138.947   1
  -6  -2   4 1065.62 123.635   2
  -6  -2   4 889.668 183.612   5
  -6  -2   3 722.740 118.709   3
  -6  -2   3 725.318 75.8262   6
   6   2  -3 772.790 121.473   1
  -6  -2   3 702.788 158.532   5
  -6  -2   3 714.010 129.662   1
  -6  -2   3 698.063 96.3250   2
   6   2  -2 239.460 69.4320   1
  -6  -2   2 273.721 41.0912   6
  -6  -2   2 237.185 69.5339   3
  -6  -2   2 260.818 58.6449   2
  -6  -2   2 205.122 65.6883   1
  -6  -2   2 338.623 106.169   5
  -6  -2   1 1216.62 149.038   3
   6   2  -1 1220.74 142.632   1
  -6  -2   1 1118.29 188.960   5
  -6  -2   1 1056.50 114.915   2
  -6  -2   0 61.7022 21.5720   6
  -6  -2   0 97.6500 51.2716   5
   6   2   0 131.883 45.0801   1
  -6  -2   0 149.966 50.2191   3
  -6  -2   0 37.2866 14.5463   2
  -6  -2   0 169.250 94.2713   4
   6   2   1 162.991 52.3337   1
  -6  -2  -1 131.297 27.2031   6
  -6  -2  -1 144.590 47.9170   5
   6   2   1 93.6793 35.6628   5
  -6  -2  -1-8.35054 58.4098   4
  -6  -2  -1 161.647 50.1270   2
  -6  -2  -2 335.596 51.8166   6
   6   2   2 331.307 87.2546   5
   6   2   2 410.099 82.8041   1
  -6  -2  -2 432.826 129.096   4
   6   2   3-19.3554 47.9643   1
  -6  -2  -3 49.2470 21.6748   6
   6   2   3 15.8477 47.8059   5
  -6  -2  -4 2111.48 146.801   6
   6   2   4 2015.68 213.795   5
   6   2   4 2086.73 315.280   4
  -6  -2  -5 898.962 103.253   6
   6   2   5 958.152 152.333   5
   6   2   5 795.946 209.508   4
   6   2   6 1271.01 173.810   6
  -6  -2  -6 1411.61 138.830   6
   6   2   6 1266.95 266.833   4
   6   2   7-9.45896 21.5592   6
  -6  -2  -7 3.97622 21.0995   6
   6   2   7 55.0592 61.1736   4
   6   2   8-15.3363 18.0535   6
  -6  -2  -8-20.9891 26.7552   6
   6   2   8-30.0215 82.1276   4
   6   2   9 302.111 97.9374   6
  -6  -2  -9 394.495 88.9572   6
  -6  -2 -10 1357.32 173.771   6
  -6  -2 -11 278.861 82.6348   6
  -6  -2 -11 365.984 90.5614   2
  -6  -2 -12 207.560 86.0906   6
  -6  -2 -12 228.423 76.0148   2
  -6  -2 -13 992.194 173.467   6
  -6  -2 -13 1002.16 164.902   2
  -6  -2 -14 247.952 95.8579   6
  -6  -2 -14 320.764 96.1483   2
  -6  -2 -15 20.5914 23.9240   6
  -6  -2 -15 34.4800 37.4021   2
  -6  -2 -16 61.4339 47.3562   2
   6   3 -12 73.3157 50.7020   2
   6   3 -11 81.8669 43.2545   2
  -6  -3  10 80.1189 42.3699   3
   6   3 -10 85.9952 50.8637   2
  -6  -3   9 338.786 104.097   3
   6   3  -9 323.544 92.3239   2
   6   3  -8 2503.21 245.038   2
  -6  -3   8 2634.95 269.623   3
  -6  -3   8 2258.46 233.910   6
  -6  -3   8 1922.06 184.951   2
  -6  -3   7 141.411 49.5673   6
  -6  -3   7 90.4038 54.7352   3
  -6  -3   7 124.572 44.7697   2
   6   3  -7 191.793 65.9498   2
  -6  -3   6 198.522 55.1977   6
  -6  -3   6 230.378 79.4026   3
  -6  -3   6 145.320 44.9680   2
  -6  -3   5-17.7117 43.2640   3
  -6  -3   5 28.3954 15.7996   6
  -6  -3   5 62.6171 29.7305   2
  -6  -3   4-40.5410 43.4728   3
  -6  -3   4 16.1826 19.6227   6
  -6  -3   4-69.1294 56.3329   5
  -6  -3   4 13.3946 16.4508   2
   6   3  -4 66.1578 33.1609   2
  -6  -3   3 936.715 146.118   3
  -6  -3   3 765.723 73.3767   6
  -6  -3   3 728.312 141.941   1
  -6  -3   3 738.113 91.7344   2
  -6  -3   3 857.976 190.689   5
  -6  -3   2 317.790 36.7840   6
  -6  -3   2 308.033 83.1819   3
  -6  -3   2 296.307 55.8345   2
  -6  -3   2 235.171 74.0964   1
  -6  -3   2 306.042 108.503   5
   6   3  -2 294.328 71.5779   1
  -6  -3   1-32.0335 38.4308   3
  -6  -3   1 8.56175 12.8458   2
  -6  -3   1 12.7232 20.2737   5
  -6  -3   1-17.8836 31.9935   1
   6   3  -1 14.2284 30.2576   1
   6   3   0 1889.51 176.348   1
  -6  -3   0 1891.80 257.055   5
  -6  -3   0 2524.83 304.812   4
  -6  -3   0 2044.67 220.169   3
  -6  -3   0 1416.57 121.771   2
  -6  -3  -1 1059.25 111.229   2
   6   3   1 1207.95 136.824   1
  -6  -3  -1 1429.53 216.243   5
   6   3   1 1134.29 170.875   5
  -6  -3  -1 960.297 164.621   4
  -6  -3  -2 51281.2 407.788   6
   6   3   2 50615.2 1161.73   5
   6   3   2 50397.3 880.208   1
  -6  -3  -2 51149.8 1218.07   4
  -6  -3  -3 338.649 47.0703   6
   6   3   3 593.068 100.515   1
   6   3   3 782.784 149.610   5
  -6  -3  -4 4911.53 196.558   6
   6   3   4 5121.81 375.984   5
   6   3   4 4987.31 272.785   1
   6   3   4 4547.32 408.096   4
   6   3   5 1346.04 149.917   6
  -6  -3  -5 1408.56 118.087   6
   6   3   5 1520.01 209.094   5
   6   3   5 1217.10 232.412   4
   6   3   6 268.901 75.6555   6
  -6  -3  -6 256.745 58.8156   6
   6   3   6 530.149 170.122   4
   6   3   7 1315.38 167.087   6
  -6  -3  -7 1386.38 142.044   6
   6   3   7 1473.89 294.140   4
  -6  -3  -8 577.590 98.7232   6
   6   3   8 505.195 106.471   6
   6   3   8 630.412 210.498   4
   6   3   9 903.530 157.609   6
  -6  -3  -9 1043.53 140.680   6
   6   3  10 1461.83 212.104   6
  -6  -3 -10 1560.80 183.294   6
  -6  -3 -10 1258.47 162.393   2
  -6  -3 -11 2048.42 220.182   6
  -6  -3 -11 1739.74 199.301   2
  -6  -3 -12 3444.33 304.227   6
  -6  -3 -12 3512.81 292.804   2
  -6  -3 -13 1481.76 194.628   2
  -6  -3 -14-3.66802 27.0676   2
  -6  -3 -15 265.396 82.8511   2
  -6  -3 -16 18.4117 26.1611   2
  -6  -4  11 7.71729 26.2279   3
   6   4 -11 66.5891 52.5822   2
  -6  -4  10 63.2053 55.1312   3
   6   4 -10-7.42590 20.7503   2
  -6  -4   9 288.106 95.6988   3
   6   4  -9 227.876 70.2219   2
  -6  -4   8 3586.53 325.288   3
   6   4  -8 4005.88 294.892   2
  -6  -4   7 6.81327 27.2595   6
  -6  -4   7 76.6528 39.6502   3
  -6  -4   7 40.3590 30.7692   2
   6   4  -7 9.36014 20.1636   2
  -6  -4   6 45.7815 30.0384   6
  -6  -4   6 10.6413 21.1922   3
  -6  -4   6 1.99797 13.8888   2
  -6  -4   5 56.9345 27.8024   6
  -6  -4   5-51.1412 64.0686   3
  -6  -4   5 68.8255 25.6597   2
   6   4  -5 50.6489 27.7232   2
  -6  -4   4 249.372 51.5357   6
  -6  -4   4 178.993 67.9479   3
  -6  -4   4 219.126 104.177   5
  -6  -4   4 281.809 51.6653   2
   6   4  -4 273.957 64.3412   2
  -6  -4   3 234.355 80.4100   1
  -6  -4   3 240.105 43.1982   6
  -6  -4   3 330.109 85.4614   3
  -6  -4   3 219.595 90.2416   5
  -6  -4   3 223.641 44.6239   2
  -6  -4   2 923.681 157.814   3
  -6  -4   2 914.504 143.675   1
  -6  -4   2 794.913 81.2165   2
  -6  -4   2 761.882 176.772   5
  -6  -4   1 1.34408 36.5468   3
  -6  -4   1-2.84827 10.2653   2
  -6  -4   1-40.3815 43.7792   5
   6   4  -1-59.8305 48.2512   1
  -6  -4   1 27.4615 39.1642   1
   6   4   0 719.421 101.396   1
  -6  -4   0 685.458 163.329   5
  -6  -4   0 880.686 125.054   1
  -6  -4   0 910.332 160.751   4
  -6  -4   0 754.707 76.9408   2
   6   4   1 3.98252 17.4675   1
  -6  -4  -1 7.03684 45.5822   5
  -6  -4  -1 28.6095 18.7583   2
  -6  -4  -1 68.8005 38.8724   4
   6   4   2 1657.66 155.955   1
   6   4   3 1059.55 121.887   1
   6   4   3 897.801 169.234   5
   6   4   4 2174.68 153.758   6
   6   4   4 2043.65 257.361   5
   6   4   4 2317.56 178.266   1
   6   4   4 2104.73 225.383   4
   6   4   5 2000.01 161.282   6
   6   4   5 2550.31 183.527   1
   6   4   5 2185.99 274.891   4
   6   4   6 369.743 71.7235   6
   6   4   6 423.255 74.7438   1
   6   4   6 315.919 122.826   4
   6   4   7 47.5803 30.3030   6
   6   4   7-0.38067 40.7063   4
   6   4   8 594.203 111.755   6
   6   4   9 1791.76 208.274   6
  -6  -4  -9 1969.59 185.698   2
   6   4  10 292.707 87.6342   6
  -6  -4 -10 262.583 75.8089   2
  -6  -4 -11 675.002 124.598   2
  -6  -4 -12 113.152 55.4621   2
  -6  -4 -13 1366.48 184.985   2
  -6  -4 -14 112.257 52.0396   2
  -6  -4 -15 100.197 52.5228   2
  -6  -4 -16 86.0078 51.2550   2
  -6  -4 -17 54.9932 52.3927   2
  -6  -5  11-68.1011 53.9192   3
  -6  -5  10-32.5616 53.2109   3
   6   5 -10 21.8487 27.0660   2
  -6  -5   9 1012.84 180.561   3
   6   5  -9 810.041 132.836   2
  -6  -5   8 230.012 81.3068   3
   6   5  -8 325.702 83.9024   2
  -6  -5   7 44.5114 35.6520   6
  -6  -5   7 9.34151 27.5477   3
  -6  -5   6 42.0125 31.1321   6
  -6  -5   6 19.6351 43.9787   3
   6   5  -6 10.3891 20.4691   2
  -6  -5   5 44.2091 29.7778   6
  -6  -5   5-22.9646 64.2226   3
  -6  -5   5 8.42444 13.8492   2
   6   5  -5 35.0730 27.3160   2
  -6  -5   4 61.2264 20.0064   2
  -6  -5   4 69.4149 51.2546   3
[truncated: 147,220 more chars]
