# Supplementary material
Source: MDPI journal article supplement (https://www.mdpi.com/2073-4352/12/5/663)
Supplement: s1 [file s1 › 1-DMF CIF.cif]

 
data_shelx
 
_audit_creation_method            'SHELXL-2018/1'
_shelx_SHELXL_version_number      '2018/1'
_chemical_name_systematic         ?
_chemical_name_common             ?
_chemical_melting_point           ?
_chemical_formula_moiety          ?
_chemical_formula_sum
 'C21 H26 N4 O3 S' 
_chemical_formula_weight          414.52

loop_
 _atom_type_symbol
 _atom_type_description
 _atom_type_scat_dispersion_real
 _atom_type_scat_dispersion_imag
 _atom_type_scat_source
 'C'  'C'   0.0033   0.0016
 'International Tables Vol C Tables 4.2.6.8 and 6.1.1.4'
 'H'  'H'   0.0000   0.0000
 'International Tables Vol C Tables 4.2.6.8 and 6.1.1.4'
 'N'  'N'   0.0061   0.0033
 'International Tables Vol C Tables 4.2.6.8 and 6.1.1.4'
 'O'  'O'   0.0106   0.0060
 'International Tables Vol C Tables 4.2.6.8 and 6.1.1.4'
 'S'  'S'   0.1246   0.1234
 'International Tables Vol C Tables 4.2.6.8 and 6.1.1.4'
 
_space_group_crystal_system       triclinic
_space_group_IT_number            2
_space_group_name_H-M_alt         'P -1'
_space_group_name_Hall            '-P 1'
 
_shelx_space_group_comment
;
The symmetry employed for this shelxl refinement is uniquely defined
by the following loop, which should always be used as a source of
symmetry information in preference to the above space-group names.
They are only intended as comments.
;
 
loop_
 _space_group_symop_operation_xyz
 'x, y, z'
 '-x, -y, -z'
 
_cell_length_a                    9.3300(10)
_cell_length_b                    9.4551(11)
_cell_length_c                    13.6082(13)
_cell_angle_alpha                 91.915(9)
_cell_angle_beta                  94.146(9)
_cell_angle_gamma                 115.268(11)
_cell_volume                      1080.0(2)
_cell_formula_units_Z             2
_cell_measurement_temperature     293(2)
_cell_measurement_reflns_used   3410
_cell_measurement_theta_min     4.0140
_cell_measurement_theta_max     27.8640
 
_exptl_crystal_description        block
_exptl_crystal_colour             colourless
_exptl_crystal_density_meas       ?
_exptl_crystal_density_method     ?
_exptl_crystal_density_diffrn     1.275          
_exptl_crystal_F_000              440
_exptl_transmission_factor_min    ?
_exptl_transmission_factor_max    ?
_exptl_crystal_size_max           0.431
_exptl_crystal_size_mid           0.179
_exptl_crystal_size_min           0.155
_exptl_absorpt_coefficient_mu     0.179
_shelx_estimated_absorpt_T_min    0.927
_shelx_estimated_absorpt_T_max    0.973
_exptl_absorpt_correction_T_min                     0.490
_exptl_absorpt_correction_T_max                     1.000
_exptl_absorpt_correction_type            gaussian
_exptl_absorpt_process_details
;
CrysAlisPro 1.171.41.112a (Rigaku Oxford Diffraction, 2021)
Numerical absorption correction based on gaussian integration over
a multifaceted crystal model
Empirical absorption correction using spherical harmonics,
implemented in SCALE3 ABSPACK scaling algorithm.
;
_diffrn_ambient_temperature       293(2)
_diffrn_radiation_wavelength      0.71073
_diffrn_radiation_type            MoK\a
_diffrn_source                    ?
_diffrn_measurement_device_type 'SuperNova, Dual, Cu at home/near, Atlas'
_diffrn_measurement_method '\w scans'
_diffrn_detector_area_resol_mean  ?
_diffrn_reflns_number             9197
_diffrn_reflns_av_unetI/netI      0.0403
_diffrn_reflns_av_R_equivalents   0.0206
_diffrn_reflns_limit_h_min        -12
_diffrn_reflns_limit_h_max        12
_diffrn_reflns_limit_k_min        -11
_diffrn_reflns_limit_k_max        10
_diffrn_reflns_limit_l_min        -17
_diffrn_reflns_limit_l_max        18
_diffrn_reflns_theta_min          3.681
_diffrn_reflns_theta_max          29.869
_diffrn_reflns_theta_full         25.242
_diffrn_measured_fraction_theta_max   0.828
_diffrn_measured_fraction_theta_full  0.997
_diffrn_reflns_Laue_measured_fraction_max    0.828
_diffrn_reflns_Laue_measured_fraction_full   0.997
_diffrn_reflns_point_group_measured_fraction_max   0.828
_diffrn_reflns_point_group_measured_fraction_full  0.997
_reflns_number_total              5143
_reflns_number_gt                 3614
_reflns_threshold_expression      'I > 2\s(I)'
_reflns_Friedel_coverage          0.000
_reflns_Friedel_fraction_max      .
_reflns_Friedel_fraction_full     .
 
_reflns_special_details
;
 Reflections were merged by SHELXL according to the crystal
 class for the calculation of statistics and refinement.
 
 _reflns_Friedel_fraction is defined as the number of unique
 Friedel pairs measured divided by the number that would be
 possible theoretically, ignoring centric projections and
 systematic absences.
;
 
_computing_data_collection     'CrysAlisPro 1.171.41.112a (Rigaku OD, 2021)'
_computing_cell_refinement     'CrysAlisPro 1.171.41.112a (Rigaku OD, 2021)'
_computing_data_reduction      'CrysAlisPro 1.171.41.112a (Rigaku OD, 2021)'
_computing_structure_solution   'SHELXS'
_computing_structure_refinement 'SHELXL-2018/1 (Sheldrick, 2018)'
_computing_molecular_graphics     ?
_computing_publication_material   ?
_refine_special_details           ?
_refine_ls_structure_factor_coef  Fsqd
_refine_ls_matrix_type            full
_refine_ls_weighting_scheme       calc
_refine_ls_weighting_details
'w=1/[\s^2^(Fo^2^)+(0.0529P)^2^+0.2709P] where P=(Fo^2^+2Fc^2^)/3'
_atom_sites_solution_primary      ?
_atom_sites_solution_secondary    ?
_atom_sites_solution_hydrogens    geom
_refine_ls_hydrogen_treatment     constr
_refine_ls_extinction_method      none
_refine_ls_extinction_coef        .
_refine_ls_number_reflns          5143
_refine_ls_number_parameters      314
_refine_ls_number_restraints      214
_refine_ls_R_factor_all           0.0785
_refine_ls_R_factor_gt            0.0517
_refine_ls_wR_factor_ref          0.1392
_refine_ls_wR_factor_gt           0.1189
_refine_ls_goodness_of_fit_ref    1.061
_refine_ls_restrained_S_all       1.050
_refine_ls_shift/su_max           0.000
_refine_ls_shift/su_mean          0.000
 
loop_
 _atom_site_label
 _atom_site_type_symbol
 _atom_site_fract_x
 _atom_site_fract_y
 _atom_site_fract_z
 _atom_site_U_iso_or_equiv
 _atom_site_adp_type
 _atom_site_occupancy
 _atom_site_site_symmetry_order  
 _atom_site_calc_flag
 _atom_site_refinement_flags_posn
 _atom_site_refinement_flags_adp
 _atom_site_refinement_flags_occupancy
 _atom_site_disorder_assembly
 _atom_site_disorder_group
C1 C 0.1463(3) -0.1627(3) 1.10708(17) 0.0619(6) Uani 1 1 d . . . . .
H1A H 0.239646 -0.181501 1.107417 0.093 Uiso 1 1 calc R U . . .
H1B H 0.055894 -0.258539 1.116765 0.093 Uiso 1 1 calc R U . . .
H1C H 0.161131 -0.085592 1.159353 0.093 Uiso 1 1 calc R U . . .
C2 C 0.2375(2) 0.0281(2) 0.98763(14) 0.0432(5) Uani 1 1 d . . . . .
C3 C 0.3808(3) 0.1140(2) 1.04257(15) 0.0474(5) Uani 1 1 d . . . . .
H3 H 0.402446 0.082847 1.103792 0.057 Uiso 1 1 calc R U . . .
C4 C 0.4925(2) 0.2474(2) 1.00590(14) 0.0440(5) Uani 1 1 d . . . . .
H4 H 0.589788 0.304047 1.042880 0.053 Uiso 1 1 calc R U . . .
C5 C 0.4634(2) 0.2986(2) 0.91596(13) 0.0359(4) Uani 1 1 d . . . . .
C6 C 0.3159(2) 0.2106(2) 0.86162(14) 0.0429(5) Uani 1 1 d . . . . .
H6 H 0.292809 0.242871 0.801118 0.052 Uiso 1 1 calc R U . . .
C7 C 0.2056(2) 0.0776(2) 0.89674(15) 0.0482(5) Uani 1 1 d . . . . .
H7 H 0.108603 0.019920 0.859671 0.058 Uiso 1 1 calc R U . . .
C8 C 0.5821(2) 0.4395(2) 0.87847(13) 0.0351(4) Uani 1 1 d . . . . .
C9 C 0.7477(2) 0.5390(2) 0.92694(13) 0.0378(4) Uani 1 1 d . . . . .
H9A H 0.801200 0.475065 0.947445 0.045 Uiso 1 1 calc R U . . .
H9B H 0.745731 0.602958 0.983589 0.045 Uiso 1 1 calc R U . . .
C10 C 0.8272(2) 0.6402(2) 0.84277(13) 0.0363(4) Uani 1 1 d . . . . .
H10 H 0.893623 0.749039 0.867794 0.044 Uiso 1 1 calc R U . . .
C11 C 0.6821(2) 0.7101(2) 0.70242(14) 0.0382(4) Uani 1 1 d . . . . .
C12 C 0.9235(2) 0.5736(2) 0.78734(13) 0.0334(4) Uani 1 1 d . . . . .
C13 C 1.0751(2) 0.6016(2) 0.82647(14) 0.0404(4) Uani 1 1 d . . . . .
H13 H 1.118027 0.664055 0.885033 0.048 Uiso 1 1 calc R U . . .
C14 C 1.1638(2) 0.5388(2) 0.78044(14) 0.0427(5) Uani 1 1 d . . . . .
H14 H 1.265203 0.558761 0.808226 0.051 Uiso 1 1 calc R U . . .
C15 C 1.1026(2) 0.4464(2) 0.69318(14) 0.0395(4) Uani 1 1 d . . . . .
C16 C 0.9512(2) 0.4149(3) 0.65368(15) 0.0485(5) Uani 1 1 d . . . . .
H16 H 0.908196 0.351093 0.595632 0.058 Uiso 1 1 calc R U . . .
C17 C 0.8629(2) 0.4788(2) 0.70080(15) 0.0453(5) Uani 1 1 d . . . . .
H17 H 0.760787 0.457389 0.673511 0.054 Uiso 1 1 calc R U . . .
C18 C 1.1497(3) 0.3065(4) 0.5585(2) 0.0859(9) Uani 1 1 d . . . . .
H18A H 1.060573 0.208083 0.565267 0.129 Uiso 1 1 calc R U . . .
H18B H 1.234909 0.287677 0.534780 0.129 Uiso 1 1 calc R U . . .
H18C H 1.118471 0.365256 0.512517 0.129 Uiso 1 1 calc R U . . .
N1 N 0.54973(18) 0.49434(18) 0.79873(11) 0.0379(4) Uani 1 1 d . . . . .
N2 N 0.68524(18) 0.62768(18) 0.78162(11) 0.0373(4) Uani 1 1 d . . . . .
N3 N 0.5435(2) 0.6560(2) 0.64753(13) 0.0520(5) Uani 1 1 d . . . . .
H3A H 0.463949 0.574164 0.663316 0.062 Uiso 1 1 calc R U . . .
H3B H 0.533265 0.702725 0.596188 0.062 Uiso 1 1 calc R U . . .
O1 O 0.12007(18) -0.10717(17) 1.01496(11) 0.0572(4) Uani 1 1 d . . . . .
O2 O 1.20195(17) 0.39301(18) 0.65206(11) 0.0545(4) Uani 1 1 d . . . . .
S1 S 0.84354(6) 0.87134(6) 0.68021(4) 0.04915(17) Uani 1 1 d . . . . .
C19 C 0.5981(4) 0.9022(4) 0.4529(2) 0.0621(8) Uani 0.854(3) 1 d D U P A 1
H19 H 0.685781 0.936566 0.499743 0.074 Uiso 0.854(3) 1 calc R U P A 1
C20 C 0.4754(4) 0.9436(4) 0.3032(2) 0.0707(9) Uani 0.854(3) 1 d D U P A 1
H20A H 0.399719 0.837692 0.309971 0.106 Uiso 0.854(3) 1 calc R U P A 1
H20B H 0.511282 0.951924 0.238336 0.106 Uiso 0.854(3) 1 calc R U P A 1
H20C H 0.425853 1.012985 0.312508 0.106 Uiso 0.854(3) 1 calc R U P A 1
C21 C 0.7487(4) 1.1306(4) 0.3678(3) 0.0933(12) Uani 0.854(3) 1 d D U P A 1
H21A H 0.723973 1.217864 0.380296 0.140 Uiso 0.854(3) 1 calc R U P A 1
H21B H 0.781516 1.132556 0.302390 0.140 Uiso 0.854(3) 1 calc R U P A 1
H21C H 0.833334 1.137564 0.415119 0.140 Uiso 0.854(3) 1 calc R U P A 1
N4 N 0.6092(3) 0.9859(3) 0.3762(2) 0.0561(7) Uani 0.854(3) 1 d D U P A 1
O3 O 0.4812(9) 0.7825(6) 0.4677(4) 0.0830(12) Uani 0.854(3) 1 d D U P A 1
C19A C 0.4860(18) 0.8411(17) 0.3865(12) 0.070(3) Uani 0.146(3) 1 d D U P A 2
H19A H 0.396160 0.801156 0.341222 0.084 Uiso 0.146(3) 1 calc R U P A 2
C20A C 0.589(3) 1.060(2) 0.2850(13) 0.084(5) Uani 0.146(3) 1 d D U P A 2
H20D H 0.648546 1.044710 0.234744 0.126 Uiso 0.146(3) 1 calc R U P A 2
H20E H 0.629758 1.170397 0.303981 0.126 Uiso 0.146(3) 1 calc R U P A 2
H20F H 0.478805 1.021344 0.259803 0.126 Uiso 0.146(3) 1 calc R U P A 2
C21A C 0.745(2) 1.045(2) 0.4387(15) 0.093(5) Uani 0.146(3) 1 d D U P A 2
H21D H 0.732391 0.980055 0.493173 0.140 Uiso 0.146(3) 1 calc R U P A 2
H21E H 0.762303 1.148141 0.462712 0.140 Uiso 0.146(3) 1 calc R U P A 2
H21F H 0.834539 1.051203 0.405425 0.140 Uiso 0.146(3) 1 calc R U P A 2
N4A N 0.6020(18) 0.9774(16) 0.3702(11) 0.065(4) Uani 0.146(3) 1 d D U P A 2
O3A O 0.487(5) 0.763(3) 0.456(2) 0.077(6) Uani 0.146(3) 1 d D U P A 2
 
loop_
 _atom_site_aniso_label
 _atom_site_aniso_U_11
 _atom_site_aniso_U_22
 _atom_site_aniso_U_33
 _atom_site_aniso_U_23
 _atom_site_aniso_U_13
 _atom_site_aniso_U_12
C1 0.0713(16) 0.0488(13) 0.0562(14) 0.0133(10) 0.0119(12) 0.0153(12)
C2 0.0422(11) 0.0378(10) 0.0427(11) 0.0011(8) 0.0067(9) 0.0105(9)
C3 0.0497(12) 0.0498(12) 0.0367(10) 0.0097(8) 0.0008(9) 0.0157(10)
C4 0.0356(10) 0.0485(11) 0.0403(11) 0.0026(8) -0.0017(8) 0.0115(9)
C5 0.0334(10) 0.0388(10) 0.0350(9) 0.0008(7) 0.0054(8) 0.0150(8)
C6 0.0365(11) 0.0492(12) 0.0367(10) 0.0049(8) -0.0006(8) 0.0130(9)
C7 0.0399(11) 0.0474(12) 0.0443(11) 0.0020(9) -0.0020(9) 0.0073(9)
C8 0.0310(9) 0.0391(10) 0.0357(9) 0.0009(7) 0.0039(7) 0.0157(8)
C9 0.0323(10) 0.0443(11) 0.0356(10) -0.0011(8) 0.0010(8) 0.0161(8)
C10 0.0279(9) 0.0377(10) 0.0400(10) 0.0002(7) -0.0008(8) 0.0118(8)
C11 0.0380(10) 0.0394(10) 0.0414(10) 0.0024(8) 0.0053(8) 0.0205(8)
C12 0.0274(9) 0.0340(9) 0.0350(9) 0.0021(7) 0.0020(7) 0.0097(7)
C13 0.0323(10) 0.0476(11) 0.0361(10) -0.0020(8) -0.0014(8) 0.0132(8)
C14 0.0293(10) 0.0557(12) 0.0416(11) -0.0026(9) -0.0028(8) 0.0182(9)
C15 0.0349(10) 0.0442(11) 0.0406(10) 0.0026(8) 0.0045(8) 0.0180(8)
C16 0.0417(11) 0.0572(13) 0.0443(11) -0.0160(9) -0.0078(9) 0.0223(10)
C17 0.0310(10) 0.0535(12) 0.0489(12) -0.0088(9) -0.0067(9) 0.0183(9)
C18 0.083(2) 0.121(3) 0.0705(18) -0.0393(16) -0.0074(15) 0.066(2)
N1 0.0290(8) 0.0406(9) 0.0428(9) 0.0039(7) 0.0039(7) 0.0136(7)
N2 0.0282(8) 0.0393(9) 0.0438(9) 0.0068(7) 0.0037(7) 0.0136(7)
N3 0.0391(10) 0.0578(11) 0.0545(11) 0.0205(8) -0.0006(8) 0.0160(8)
O1 0.0547(9) 0.0469(9) 0.0508(9) 0.0092(7) 0.0053(7) 0.0031(7)
O2 0.0444(8) 0.0734(10) 0.0520(9) -0.0129(7) 0.0003(7) 0.0333(8)
S1 0.0457(3) 0.0438(3) 0.0512(3) 0.0083(2) 0.0060(2) 0.0122(2)
C19 0.0647(18) 0.0681(18) 0.0568(16) 0.0070(13) -0.0052(14) 0.0334(15)
C20 0.078(2) 0.080(2) 0.0600(18) 0.0105(15) -0.0063(16) 0.0413(18)
C21 0.067(2) 0.084(2) 0.111(3) 0.031(2) 0.013(2) 0.0132(19)
N4 0.0543(14) 0.0601(15) 0.0550(14) 0.0137(12) 0.0012(12) 0.0256(12)
O3 0.089(2) 0.078(2) 0.075(2) 0.031(2) 0.004(2) 0.0277(19)
C19A 0.070(5) 0.071(5) 0.063(5) 0.008(4) -0.006(4) 0.025(4)
C20A 0.095(8) 0.074(7) 0.075(8) 0.020(7) 0.007(7) 0.027(7)
C21A 0.070(8) 0.087(8) 0.102(8) 0.005(7) 0.005(7) 0.015(7)
N4A 0.064(5) 0.066(5) 0.063(5) 0.011(4) 0.001(4) 0.028(4)
O3A 0.078(9) 0.070(9) 0.064(9) 0.014(7) -0.013(8) 0.017(7)
 
_geom_special_details
;
 All esds (except the esd in the dihedral angle between two l.s. planes)
 are estimated using the full covariance matrix.  The cell esds are taken
 into account individually in the estimation of esds in distances, angles
 and torsion angles; correlations between esds in cell parameters are only
 used when they are defined by crystal symmetry.  An approximate (isotropic)
 treatment of cell esds is used for estimating esds involving l.s. planes.
;
 
loop_
 _geom_bond_atom_site_label_1
 _geom_bond_atom_site_label_2
 _geom_bond_distance
 _geom_bond_site_symmetry_2
 _geom_bond_publ_flag
C1 O1 1.420(3) . ?
C1 H1A 0.9600 . ?
C1 H1B 0.9600 . ?
C1 H1C 0.9600 . ?
C2 O1 1.367(2) . ?
C2 C3 1.376(3) . ?
C2 C7 1.393(3) . ?
C3 C4 1.386(3) . ?
C3 H3 0.9300 . ?
C4 C5 1.382(3) . ?
C4 H4 0.9300 . ?
C5 C6 1.403(3) . ?
C5 C8 1.460(2) . ?
C6 C7 1.369(3) . ?
C6 H6 0.9300 . ?
C7 H7 0.9300 . ?
C8 N1 1.289(2) . ?
C8 C9 1.509(3) . ?
C9 C10 1.539(2) . ?
C9 H9A 0.9700 . ?
C9 H9B 0.9700 . ?
C10 N2 1.470(2) . ?
C10 C12 1.524(2) . ?
C10 H10 0.9800 . ?
C11 N3 1.328(2) . ?
C11 N2 1.357(2) . ?
C11 S1 1.6790(19) . ?
C12 C17 1.382(3) . ?
C12 C13 1.385(3) . ?
C13 C14 1.378(3) . ?
C13 H13 0.9300 . ?
C14 C15 1.381(3) . ?
C14 H14 0.9300 . ?
C15 O2 1.372(2) . ?
C15 C16 1.375(3) . ?
C16 C17 1.390(3) . ?
C16 H16 0.9300 . ?
C17 H17 0.9300 . ?
C18 O2 1.424(3) . ?
C18 H18A 0.9600 . ?
C18 H18B 0.9600 . ?
C18 H18C 0.9600 . ?
N1 N2 1.394(2) . ?
N3 H3A 0.8600 . ?
N3 H3B 0.8600 . ?
C19 O3 1.226(7) . ?
C19 N4 1.315(4) . ?
C19 H19 0.9300 . ?
C20 N4 1.440(4) . ?
C20 H20A 0.9600 . ?
C20 H20B 0.9600 . ?
C20 H20C 0.9600 . ?
C21 N4 1.446(4) . ?
C21 H21A 0.9600 . ?
C21 H21B 0.9600 . ?
C21 H21C 0.9600 . ?
C19A O3A 1.226(12) . ?
C19A N4A 1.321(9) . ?
C19A H19A 0.9300 . ?
C20A N4A 1.449(9) . ?
C20A H20D 0.9600 . ?
C20A H20E 0.9600 . ?
C20A H20F 0.9600 . ?
C21A N4A 1.452(10) . ?
C21A H21D 0.9600 . ?
C21A H21E 0.9600 . ?
C21A H21F 0.9600 . ?
 
loop_
 _geom_angle_atom_site_label_1
 _geom_angle_atom_site_label_2
 _geom_angle_atom_site_label_3
 _geom_angle
 _geom_angle_site_symmetry_1
 _geom_angle_site_symmetry_3
 _geom_angle_publ_flag
O1 C1 H1A 109.5 . . ?
O1 C1 H1B 109.5 . . ?
H1A C1 H1B 109.5 . . ?
O1 C1 H1C 109.5 . . ?
H1A C1 H1C 109.5 . . ?
H1B C1 H1C 109.5 . . ?
O1 C2 C3 124.68(18) . . ?
O1 C2 C7 115.64(18) . . ?
C3 C2 C7 119.68(18) . . ?
C2 C3 C4 119.44(18) . . ?
C2 C3 H3 120.3 . . ?
C4 C3 H3 120.3 . . ?
C5 C4 C3 121.86(18) . . ?
C5 C4 H4 119.1 . . ?
C3 C4 H4 119.1 . . ?
C4 C5 C6 117.85(17) . . ?
C4 C5 C8 121.22(17) . . ?
C6 C5 C8 120.93(17) . . ?
C7 C6 C5 120.68(18) . . ?
C7 C6 H6 119.7 . . ?
C5 C6 H6 119.7 . . ?
C6 C7 C2 120.48(19) . . ?
C6 C7 H7 119.8 . . ?
C2 C7 H7 119.8 . . ?
N1 C8 C5 121.02(17) . . ?
N1 C8 C9 112.93(16) . . ?
C5 C8 C9 126.01(16) . . ?
C8 C9 C10 101.65(14) . . ?
C8 C9 H9A 111.4 . . ?
C10 C9 H9A 111.4 . . ?
C8 C9 H9B 111.4 . . ?
C10 C9 H9B 111.4 . . ?
H9A C9 H9B 109.3 . . ?
N2 C10 C12 111.94(15) . . ?
N2 C10 C9 99.99(14) . . ?
C12 C10 C9 111.90(15) . . ?
N2 C10 H10 110.9 . . ?
C12 C10 H10 110.9 . . ?
C9 C10 H10 110.9 . . ?
N3 C11 N2 115.16(17) . . ?
N3 C11 S1 123.99(15) . . ?
N2 C11 S1 120.83(15) . . ?
C17 C12 C13 117.75(17) . . ?
C17 C12 C10 122.59(16) . . ?
C13 C12 C10 119.58(16) . . ?
C14 C13 C12 121.37(18) . . ?
C14 C13 H13 119.3 . . ?
C12 C13 H13 119.3 . . ?
C13 C14 C15 120.21(18) . . ?
C13 C14 H14 119.9 . . ?
C15 C14 H14 119.9 . . ?
O2 C15 C16 124.92(18) . . ?
O2 C15 C14 115.61(17) . . ?
C16 C15 C14 119.48(18) . . ?
C15 C16 C17 119.80(18) . . ?
C15 C16 H16 120.1 . . ?
C17 C16 H16 120.1 . . ?
C12 C17 C16 121.38(18) . . ?
C12 C17 H17 119.3 . . ?
C16 C17 H17 119.3 . . ?
O2 C18 H18A 109.5 . . ?
O2 C18 H18B 109.5 . . ?
H18A C18 H18B 109.5 . . ?
O2 C18 H18C 109.5 . . ?
H18A C18 H18C 109.5 . . ?
H18B C18 H18C 109.5 . . ?
C8 N1 N2 107.84(15) . . ?
C11 N2 N1 119.85(15) . . ?
C11 N2 C10 126.78(15) . . ?
N1 N2 C10 111.94(13) . . ?
C11 N3 H3A 120.0 . . ?
C11 N3 H3B 120.0 . . ?
H3A N3 H3B 120.0 . . ?
C2 O1 C1 117.97(17) . . ?
C15 O2 C18 118.13(17) . . ?
O3 C19 N4 125.2(5) . . ?
O3 C19 H19 117.4 . . ?
N4 C19 H19 117.4 . . ?
N4 C20 H20A 109.5 . . ?
N4 C20 H20B 109.5 . . ?
H20A C20 H20B 109.5 . . ?
N4 C20 H20C 109.5 . . ?
H20A C20 H20C 109.5 . . ?
H20B C20 H20C 109.5 . . ?
N4 C21 H21A 109.5 . . ?
N4 C21 H21B 109.5 . . ?
H21A C21 H21B 109.5 . . ?
N4 C21 H21C 109.5 . . ?
H21A C21 H21C 109.5 . . ?
H21B C21 H21C 109.5 . . ?
C19 N4 C20 120.4(3) . . ?
C19 N4 C21 121.3(3) . . ?
C20 N4 C21 118.1(3) . . ?
O3A C19A N4A 126(2) . . ?
O3A C19A H19A 117.2 . . ?
N4A C19A H19A 117.2 . . ?
N4A C20A H20D 109.5 . . ?
N4A C20A H20E 109.5 . . ?
H20D C20A H20E 109.5 . . ?
N4A C20A H20F 109.5 . . ?
H20D C20A H20F 109.5 . . ?
H20E C20A H20F 109.5 . . ?
N4A C21A H21D 109.5 . . ?
N4A C21A H21E 109.5 . . ?
H21D C21A H21E 109.5 . . ?
N4A C21A H21F 109.5 . . ?
H21D C21A H21F 109.5 . . ?
H21E C21A H21F 109.5 . . ?
C19A N4A C20A 121.0(12) . . ?
C19A N4A C21A 119.4(11) . . ?
C20A N4A C21A 119.6(12) . . ?
 
loop_
 _geom_torsion_atom_site_label_1
 _geom_torsion_atom_site_label_2
 _geom_torsion_atom_site_label_3
 _geom_torsion_atom_site_label_4
 _geom_torsion
 _geom_torsion_site_symmetry_1
 _geom_torsion_site_symmetry_2
 _geom_torsion_site_symmetry_3
 _geom_torsion_site_symmetry_4
 _geom_torsion_publ_flag
O1 C2 C3 C4 178.31(18) . . . . ?
C7 C2 C3 C4 -1.0(3) . . . . ?
C2 C3 C4 C5 1.0(3) . . . . ?
C3 C4 C5 C6 -0.2(3) . . . . ?
C3 C4 C5 C8 179.82(17) . . . . ?
C4 C5 C6 C7 -0.6(3) . . . . ?
C8 C5 C6 C7 179.40(17) . . . . ?
C5 C6 C7 C2 0.6(3) . . . . ?
O1 C2 C7 C6 -179.13(18) . . . . ?
C3 C2 C7 C6 0.3(3) . . . . ?
C4 C5 C8 N1 -174.06(17) . . . . ?
C6 C5 C8 N1 6.0(3) . . . . ?
C4 C5 C8 C9 3.5(3) . . . . ?
C6 C5 C8 C9 -176.50(17) . . . . ?
N1 C8 C9 C10 -16.25(19) . . . . ?
C5 C8 C9 C10 166.04(16) . . . . ?
C8 C9 C10 N2 21.57(17) . . . . ?
C8 C9 C10 C12 -97.09(17) . . . . ?
N2 C10 C12 C17 -15.1(2) . . . . ?
C9 C10 C12 C17 96.2(2) . . . . ?
N2 C10 C12 C13 168.03(16) . . . . ?
C9 C10 C12 C13 -80.7(2) . . . . ?
C17 C12 C13 C14 0.7(3) . . . . ?
C10 C12 C13 C14 177.68(17) . . . . ?
C12 C13 C14 C15 0.3(3) . . . . ?
C13 C14 C15 O2 178.39(17) . . . . ?
C13 C14 C15 C16 -1.3(3) . . . . ?
O2 C15 C16 C17 -178.40(18) . . . . ?
C14 C15 C16 C17 1.3(3) . . . . ?
C13 C12 C17 C16 -0.7(3) . . . . ?
C10 C12 C17 C16 -177.61(18) . . . . ?
C15 C16 C17 C12 -0.3(3) . . . . ?
C5 C8 N1 N2 -179.71(14) . . . . ?
C9 C8 N1 N2 2.5(2) . . . . ?
N3 C11 N2 N1 1.5(2) . . . . ?
S1 C11 N2 N1 179.88(12) . . . . ?
N3 C11 N2 C10 166.77(17) . . . . ?
S1 C11 N2 C10 -14.9(3) . . . . ?
C8 N1 N2 C11 -178.88(15) . . . . ?
C8 N1 N2 C10 13.81(19) . . . . ?
C12 C10 N2 C11 -70.3(2) . . . . ?
C9 C10 N2 C11 171.04(17) . . . . ?
C12 C10 N2 N1 95.90(16) . . . . ?
C9 C10 N2 N1 -22.73(18) . . . . ?
C3 C2 O1 C1 0.8(3) . . . . ?
C7 C2 O1 C1 -179.85(19) . . . . ?
C16 C15 O2 C18 4.1(3) . . . . ?
C14 C15 O2 C18 -175.6(2) . . . . ?
O3 C19 N4 C20 2.9(6) . . . . ?
O3 C19 N4 C21 176.4(4) . . . . ?
O3A C19A N4A C20A 179.99(14) . . . . ?
O3A C19A N4A C21A 0.0(2) . . . . ?
 
loop_
 _geom_hbond_atom_site_label_D 
 _geom_hbond_atom_site_label_H 
 _geom_hbond_atom_site_label_A 
 _geom_hbond_distance_DH 
 _geom_hbond_distance_HA 
 _geom_hbond_distance_DA 
 _geom_hbond_angle_DHA 
 _geom_hbond_site_symmetry_A 
 _geom_hbond_publ_flag
N3 H3A O2  0.86 2.30 3.101(2) 155.2 1_455 yes
N3 H3B O3^a  0.86 2.03 2.888(5) 171.5 . yes
N3 H3B O3A^b  0.86 2.07 2.92(3) 166.5 . yes
 
_refine_diff_density_max    0.193
_refine_diff_density_min   -0.240
_refine_diff_density_rms    0.047

_shelx_res_file
;
TITL bmk2119b in P-1
    shelx.res
    created by SHELXL-2018/1 at 11:11:51 on 05-Apr-2022
CELL  0.71073   9.3300   9.4551  13.6082   91.915   94.146  115.268
ZERR     2.00   0.0010   0.0011   0.0013    0.009    0.009    0.011
LATT   1
SFAC  C    H    N    O    S
UNIT  42 52 8 6 2
MERG   2
mpla c2 c3 c4 c5 c6 c7
MPLA  4 N1 N2 C8 C9 C10
MPLA  C12 C13 C14 C15 C16 C17
SIMU  .01 C19 > O3A
ISOR  .01 C19 > O3A
flat .01 c19a > o3a
EQIV $2 x-1, y, z
HTAB N3 O2_$2
HTAB N3 O3
HTAB N3 O3A
FMAP   2
PLAN   10
SIZE     0.155   0.179   0.431
ACTA
BOND   $H
CONF
LIST   6
L.S.   4
WGHT    0.052900    0.270900
FVAR       5.21191   0.85397
MOLE  1
C1    1    0.146311   -0.162698    1.107085    11.00000    0.07129    0.04875 =
         0.05619    0.01327    0.01186    0.01529
AFIX 137
H1A   2    0.239646   -0.181501    1.107417    11.00000   -1.50000
H1B   2    0.055894   -0.258539    1.116765    11.00000   -1.50000
H1C   2    0.161131   -0.085592    1.159353    11.00000   -1.50000
AFIX   0
C2    1    0.237519    0.028147    0.987626    11.00000    0.04218    0.03784 =
         0.04266    0.00115    0.00673    0.01049
C3    1    0.380774    0.114030    1.042568    11.00000    0.04970    0.04977 =
         0.03674    0.00975    0.00082    0.01572
AFIX  43
H3    2    0.402446    0.082847    1.103792    11.00000   -1.20000
AFIX   0
C4    1    0.492500    0.247395    1.005903    11.00000    0.03555    0.04848 =
         0.04031    0.00263   -0.00168    0.01153
AFIX  43
H4    2    0.589788    0.304047    1.042880    11.00000   -1.20000
AFIX   0
C5    1    0.463434    0.298571    0.915962    11.00000    0.03336    0.03883 =
         0.03501    0.00082    0.00541    0.01496
C6    1    0.315914    0.210580    0.861621    11.00000    0.03653    0.04923 =
         0.03673    0.00485   -0.00063    0.01302
AFIX  43
H6    2    0.292809    0.242871    0.801118    11.00000   -1.20000
AFIX   0
C7    1    0.205571    0.077619    0.896744    11.00000    0.03986    0.04741 =
         0.04425    0.00199   -0.00204    0.00735
AFIX  43
H7    2    0.108603    0.019920    0.859671    11.00000   -1.20000
AFIX   0
C8    1    0.582136    0.439537    0.878470    11.00000    0.03100    0.03914 =
         0.03569    0.00088    0.00393    0.01572
C9    1    0.747674    0.538960    0.926943    11.00000    0.03228    0.04435 =
         0.03565   -0.00115    0.00096    0.01612
AFIX  23
H9A   2    0.801200    0.475065    0.947445    11.00000   -1.20000
H9B   2    0.745731    0.602958    0.983589    11.00000   -1.20000
AFIX   0
C10   1    0.827214    0.640215    0.842770    11.00000    0.02794    0.03773 =
         0.04000    0.00019   -0.00085    0.01177
AFIX  13
H10   2    0.893623    0.749039    0.867794    11.00000   -1.20000
AFIX   0
C11   1    0.682141    0.710147    0.702415    11.00000    0.03802    0.03936 =
         0.04139    0.00238    0.00529    0.02048
C12   1    0.923474    0.573560    0.787339    11.00000    0.02738    0.03404 =
         0.03502    0.00213    0.00197    0.00971
C13   1    1.075134    0.601576    0.826467    11.00000    0.03226    0.04762 =
         0.03607   -0.00200   -0.00139    0.01324
AFIX  43
H13   2    1.118027    0.664055    0.885033    11.00000   -1.20000
AFIX   0
C14   1    1.163797    0.538813    0.780435    11.00000    0.02928    0.05573 =
         0.04161   -0.00262   -0.00276    0.01824
AFIX  43
H14   2    1.265203    0.558761    0.808226    11.00000   -1.20000
AFIX   0
C15   1    1.102585    0.446394    0.693176    11.00000    0.03488    0.04424 =
         0.04059    0.00260    0.00446    0.01796
C16   1    0.951249    0.414927    0.653680    11.00000    0.04169    0.05723 =
         0.04431   -0.01604   -0.00777    0.02229
AFIX  43
H16   2    0.908196    0.351093    0.595632    11.00000   -1.20000
AFIX   0
C17   1    0.862857    0.478834    0.700799    11.00000    0.03103    0.05354 =
         0.04887   -0.00878   -0.00670    0.01834
AFIX  43
H17   2    0.760787    0.457389    0.673511    11.00000   -1.20000
AFIX   0
C18   1    1.149722    0.306458    0.558541    11.00000    0.08336    0.12112 =
         0.07048   -0.03930   -0.00741    0.06613
AFIX 137
H18A  2    1.060573    0.208083    0.565267    11.00000   -1.50000
H18B  2    1.234909    0.287677    0.534780    11.00000   -1.50000
H18C  2    1.118471    0.365256    0.512517    11.00000   -1.50000
AFIX   0
N1    3    0.549731    0.494345    0.798732    11.00000    0.02896    0.04055 =
         0.04282    0.00395    0.00391    0.01361
N2    3    0.685236    0.627675    0.781624    11.00000    0.02817    0.03934 =
         0.04383    0.00682    0.00370    0.01356
N3    3    0.543511    0.655987    0.647530    11.00000    0.03907    0.05784 =
         0.05448    0.02053   -0.00056    0.01604
AFIX  93
H3A   2    0.463949    0.574164    0.663316    11.00000   -1.20000
H3B   2    0.533265    0.702725    0.596188    11.00000   -1.20000
AFIX   0
O1    4    0.120071   -0.107172    1.014956    11.00000    0.05467    0.04691 =
         0.05075    0.00920    0.00529    0.00313
O2    4    1.201946    0.393007    0.652062    11.00000    0.04440    0.07342 =
         0.05204   -0.01292    0.00034    0.03327
S1    5    0.843536    0.871340    0.680214    11.00000    0.04570    0.04376 =
         0.05117    0.00826    0.00599    0.01222
MOLE  2
PART  1
C19   1    0.598060    0.902220    0.452936    21.00000    0.06474    0.06814 =
         0.05682    0.00695   -0.00517    0.03340
AFIX  43
H19   2    0.685781    0.936566    0.499743    21.00000   -1.20000
AFIX   0
C20   1    0.475355    0.943591    0.303161    21.00000    0.07812    0.07990 =
         0.06004    0.01051   -0.00635    0.04125
AFIX 137
H20A  2    0.399719    0.837692    0.309971    21.00000   -1.50000
H20B  2    0.511282    0.951924    0.238336    21.00000   -1.50000
H20C  2    0.425853    1.012985    0.312508    21.00000   -1.50000
AFIX   0
C21   1    0.748737    1.130633    0.367790    21.00000    0.06705    0.08365 =
         0.11140    0.03058    0.01343    0.01317
AFIX 137
H21A  2    0.723973    1.217864    0.380296    21.00000   -1.50000
H21B  2    0.781516    1.132556    0.302390    21.00000   -1.50000
H21C  2    0.833334    1.137564    0.415119    21.00000   -1.50000
AFIX   0
N4    3    0.609198    0.985860    0.376175    21.00000    0.05432    0.06005 =
         0.05505    0.01367    0.00123    0.02556
O3    4    0.481199    0.782505    0.467735    21.00000    0.08902    0.07797 =
         0.07461    0.03093    0.00420    0.02772
PART  2
same .01 c19 > o3
C19A  1    0.486033    0.841083    0.386509   -21.00000    0.07020    0.07052 =
         0.06337    0.00773   -0.00556    0.02537
AFIX  43
H19A  2    0.396160    0.801156    0.341222   -21.00000   -1.20000
AFIX   0
C20A  1    0.588643    1.060468    0.284988   -21.00000    0.09529    0.07373 =
         0.07477    0.01962    0.00663    0.02687
AFIX 137
H20D  2    0.648546    1.044710    0.234744   -21.00000   -1.50000
H20E  2    0.629758    1.170397    0.303981   -21.00000   -1.50000
H20F  2    0.478805    1.021344    0.259803   -21.00000   -1.50000
AFIX   0
C21A  1    0.744913    1.044922    0.438674   -21.00000    0.07016    0.08716 =
         0.10184    0.00487    0.00529    0.01487
AFIX 137
H21D  2    0.732391    0.980055    0.493173   -21.00000   -1.50000
H21E  2    0.762303    1.148141    0.462712   -21.00000   -1.50000
H21F  2    0.834539    1.051203    0.405425   -21.00000   -1.50000
AFIX   0
N4A   3    0.601952    0.977398    0.370157   -21.00000    0.06408    0.06617 =
         0.06303    0.01130    0.00147    0.02750
O3A   4    0.486902    0.762758    0.456327   -21.00000    0.07824    0.06955 =
         0.06405    0.01450   -0.01284    0.01677
HKLF    4


REM  bmk2119b in P-1
REM R1 =  0.0517 for    3614 Fo > 4sig(Fo)  and  0.0785 for all    5143 data
REM    314 parameters refined using    214 restraints

END

WGHT      0.0529      0.2709

REM Highest difference peak  0.193,  deepest hole -0.240,  1-sigma level  0.047
Q1    1   0.3997  0.2493  0.8880  11.00000  0.05    0.19
Q2    1   0.3630  0.9158  0.3429  11.00000  0.05    0.18
Q3    1   0.6582  0.4836  0.9044  11.00000  0.05    0.18
Q4    1   1.1495  0.7336  0.8623  11.00000  0.05    0.17
Q5    1   0.4540  0.2985  0.9627  11.00000  0.05    0.16
Q6    1   0.8970  0.6121  0.8096  11.00000  0.05    0.15
Q7    1   0.5611  0.3411  1.0864  11.00000  0.05    0.15
Q8    1   0.9205  0.5805  0.7472  11.00000  0.05    0.15
Q9    1   0.7857  0.5867  0.8813  11.00000  0.05    0.14
Q10   1   0.2876  0.9562  0.2981  11.00000  0.05    0.14
;
_shelx_res_checksum   37586

_shelx_hkl_file
;
   0   0   3 74733.0 592.581   2
   0   0   3 72862.2 567.362   3
   0   0  -3 73051.2 580.670   2
   0   0   4 14001.9 300.657   2
   0   0   4 13549.3 285.048   3
   0   0  -4 13910.0 290.877   2
   0   0   5 5075.65 206.016   2
   0   0   5 5202.11 200.718   3
   0   0  -5 5480.73 205.453   2
   0   0   6 64044.7 795.385   2
   0   0   6 64392.2 783.740   3
   0   0  -6 64760.4 763.945   2
   0   0   7 1258.17 121.116   3
   0   0   7 1592.81 142.249   2
   0   0  -7 1382.95 125.284   2
   0   0   8 5238.73 267.250   3
   0   0  -8 4870.56 245.156   2
   0   0   9 35393.3 745.020   3
   0   0  -9 34103.4 689.869   2
   0   0  10 4783.21 301.335   2
   0   0  10 4744.72 295.649   3
   0   0 -10 4974.98 279.400   2
   0   0 -11 337.961 85.3498   2
   0   0  11 457.349 112.870   2
   0   0  12 955.538 157.188   2
   0   0 -12 1033.24 146.768   2
   0   0  13 2769.41 271.255   2
   0   0  14 510.632 124.686   2
   0   0  15 77.2560 66.2751   2
   0   0  16 208.844 103.286   2
   0   0  17 41.2197 60.2794   2
   0   0  18-20.7152 60.4327   2
   0  -1  18 274.254 110.780   2
   0  -1  17 483.383 132.462   2
   0  -1  16 129.374 73.7697   2
   0  -1  15 144.518 84.3407   2
   0  -1  14 3111.89 288.891   2
   0  -1  13 304.538 94.2078   2
   0   1 -12 918.478 137.472   2
   0  -1  12 860.801 142.701   2
   0  -1  11 125.568 67.5019   2
   0   1 -11 31.1051 33.2494   2
   0   1 -10 1672.46 166.152   2
   0  -1  10 1236.54 152.124   2
   0  -1  10 1400.32 168.428   3
   0  -1   9 3558.67 247.129   3
   0   1  -9 3439.43 224.009   2
   0   1  -9 3142.48 193.935   3
   0   1  -8 21076.7 517.194   2
   0  -1   8 20649.9 548.087   3
   0  -1   7 54679.6 819.552   3
   0   1  -7 53176.0 780.029   2
   0  -1   7 53488.4 312.113   5
   0  -1   7 54196.8 792.388   2
   0  -1   6 31109.1 270.286   5
   0  -1   6 31859.3 575.570   3
   0   1  -6 31139.5 542.324   2
   0  -1   6 31369.4 557.276   2
   0  -1   5 21739.7 424.093   2
   0  -1   5 21776.4 427.998   3
   0   1  -5 21189.9 419.241   2
   0   1  -5 22541.3 391.668   3
   0   1  -5 21454.9 247.967   5
   0  -1   5 21970.1 232.836   5
   0  -1   4 11657.1 168.479   5
   0   1  -4 11183.8 173.763   5
   0   1  -4 10917.6 269.463   2
   0   1  -4 11404.4 253.457   3
   0  -1   4 11275.7 269.170   2
   0  -1   4 10962.8 271.684   3
   0  -1   3 3052.18 123.201   2
   0   1  -3 2929.83 114.356   3
   0  -1   3 2776.26 120.323   3
   0  -1   3 2875.06 83.6368   5
   0   1  -3 2915.39 123.042   2
   0   1  -3 2777.63 84.6632   5
   0   1  -2 83742.7 464.542   5
   0   1  -2 85701.9 520.960   3
   0  -1   2 85592.7 458.414   5
   0   1  -2 84464.5 417.993   1
   0  -1   2 83200.8 562.669   3
   0   1  -2 84262.4 547.517   2
   0  -1   2 85618.4 529.118   2
   0   1   2 189603. 680.680   5
   0  -1  -2 190277. 670.706   5
   0   1   3 235597. 1141.63   2
   0   1   3 235548. 989.472   3
   0  -1  -3 236578. 754.570   5
   0   1   3 236022. 756.888   5
   0   1   4 2104.30 122.456   2
   0  -1  -4 2264.51 74.1271   5
   0   1   4 2191.83 111.688   3
   0   1   4 2354.59 74.2119   5
   0   1   5 668.769 73.0927   3
   0   1   5 598.545 75.1149   2
   0   1   5 713.131 41.3248   5
   0  -1  -5 682.659 40.8220   5
   0   1   6 18577.5 215.348   5
   0   1   6 18319.4 441.271   2
   0   1   6 18207.8 406.883   3
   0   1   7 7420.59 284.683   3
   0   1   8 635.003 91.0106   3
   0   1   9 1849.15 175.936   2
   0   1   9 1939.66 172.884   3
   0   1  10 79.5080 50.1692   2
   0   1  10 51.4265 39.3264   3
   0   1  11 80.5003 67.1623   2
   0   1  12 3702.53 297.332   2
   0   1  13 136.965 80.4468   2
   0   1  14 4560.99 367.409   2
   0   1  15 143.420 83.6114   2
   0   1  16 740.732 163.764   2
   0   1  17 176.996 101.230   2
   0   1  18 229.410 94.2983   2
   0  -2  18 8.56906 54.1577   2
   0  -2  17 320.304 104.996   2
   0  -2  16 136.075 74.3561   2
   0  -2  15 2479.32 263.354   2
   0  -2  14 676.726 137.609   2
   0  -2  13 136.759 72.0949   2
   0   2 -12 3238.98 261.269   2
   0  -2  12 3237.29 260.632   2
   0   2 -11 3323.14 251.567   2
   0  -2  11 3350.49 250.328   2
   0   2 -11 3570.55 234.162   1
   0   2 -10 7483.91 357.090   2
   0  -2  10 7640.48 356.635   2
   0   2 -10 7591.77 317.318   3
   0   2 -10 7735.59 325.987   1
   0   2  -9 1251.92 139.531   2
   0   2  -9 1300.33 126.347   1
   0   2  -9 1281.49 127.521   3
   0  -2   9 1232.02 74.4739   5
   0  -2   9 1146.85 148.833   3
   0   2  -8 1661.43 133.977   3
   0   2  -8 1733.88 132.516   1
   0  -2   8 1555.61 157.715   3
   0   2  -8 1378.37 97.0314   5
   0   2  -8 1456.54 143.064   2
   0  -2   8 1411.90 84.4845   5
   0  -2   7 680.855 96.7765   3
   0  -2   7 765.020 63.9357   5
   0   2  -7 657.646 63.4787   5
   0   2  -7 824.470 85.6124   1
   0  -2   7 680.282 91.0564   2
   0   2  -7 733.084 87.0580   3
   0   2  -7 766.809 98.4554   2
   0   2  -6 711.779 73.9791   1
   0  -2   6 604.750 57.9495   5
   0  -2   6 563.451 78.8929   2
   0   2  -6 641.721 86.0731   2
   0   2  -6 646.224 60.9872   5
   0   2  -6 630.920 77.5539   3
   0  -2   5 232.523 51.0573   2
   0  -2   5 251.879 38.7963   5
   0   2  -5 294.761 52.2578   3
   0   2  -5 288.034 40.6436   5
   0   2  -5 257.604 41.4074   1
   0   2  -5 224.944 54.7992   2
   0   2  -4 81568.0 649.623   5
   0   2  -4 82407.9 714.825   3
   0   2  -4 81260.9 788.157   2
   0   2  -4 83367.1 589.328   1
   0  -2   4 82377.4 643.353   5
   0   2  -3 14299.5 290.621   2
   0  -2   3 14907.6 270.780   5
   0   2  -3 14573.1 273.908   5
   0   2  -3 14341.5 208.802   1
   0   2  -3 14188.3 270.123   3
   0  -2   2 295720. 1135.63   4
   0   2  -2 297706. 1219.44   5
   0  -2   2 297900. 1213.97   5
   0  -2   2 297446. 735.670   1
   0   2  -2 294803. 808.019   1
   0  -2   1 99.1156 23.6616   4
   0   2  -1 87.0054 26.2201   5
   0   2   0 40432.5 450.745   5
   0  -2  -1 15943.0 281.481   5
   0   2   1 16126.0 283.972   5
   0  -2  -2 17581.4 293.935   5
   0   2   2 17843.3 297.707   5
   0  -2  -3 6347.70 176.591   5
   0   2   3 6348.47 177.888   5
   0   2   4 56339.0 528.489   5
   0   2   4 55142.5 564.447   3
   0  -2  -4 55447.4 520.561   5
   0   2   5 20990.5 324.978   5
   0   2   5 21818.5 473.483   2
   0  -2  -5 21331.5 326.737   5
   0   2   5 20585.7 388.128   3
   0   2   6 5787.47 227.580   3
   0   2   6 5931.81 173.096   5
   0  -2  -6 5957.76 172.519   5
   0  -2  -7 20552.0 312.479   5
   0   2   7 19647.7 319.477   5
   0   2   7 20643.5 474.387   3
   0   2   8-21.9322 34.2685   3
   0   2   8 19.4815 37.2389   2
   0  -2  -8 10.6797 16.7712   5
   0   2   8-10.8151 20.8321   5
   0   2   9 1538.82 154.085   3
   0   2   9 1400.47 159.755   2
   0   2  10 64.8793 35.7294   2
   0   2  11 839.063 146.386   2
   0   2  12 103.793 59.7605   2
   0   2  13 416.516 119.348   2
   0   2  14 1401.23 213.510   2
   0   2  15 1049.44 194.804   2
   0   2  16-4.92570 72.4774   2
   0   2  17 157.046 94.0461   2
   0   2  18-142.425 95.6215   2
   0  -3  17 11.3555 42.1886   2
   0  -3  16-0.40661 50.3039   2
   0  -3  15 631.541 135.754   2
   0  -3  14 433.765 111.281   2
   0  -3  13-28.5597 43.8973   2
   0   3 -12 1380.81 175.050   2
   0  -3  12 1425.23 169.470   2
   0  -3  11 359.089 84.5601   2
   0  -3  11 494.321 59.5375   5
   0   3 -11 501.126 91.7669   1
   0   3 -11 429.856 95.4264   2
   0   3 -11 446.818 86.4052   3
   0   3 -10 3081.72 206.493   3
   0  -3  10 2978.36 149.602   5
   0   3 -10 3062.57 239.147   2
   0  -3  10 3009.73 221.019   2
   0   3 -10 3384.29 217.854   1
   0   3  -9 7428.18 302.278   3
   0  -3   9 7144.88 239.400   5
   0   3  -9 6989.08 344.625   2
   0   3  -9 8036.19 305.624   1
   0   3  -9 6951.87 256.602   5
   0  -3   8 247.801 47.1046   5
   0   3  -8 278.332 54.0946   1
   0   3  -8 286.695 67.5650   2
   0   3  -8 251.046 50.5040   5
   0   3  -8 312.197 61.2336   3
   0  -3   7 752.860 78.8358   5
   0   3  -7 846.055 83.9430   1
   0   3  -7 724.030 101.751   2
   0  -3   7 724.727 91.0814   2
   0   3  -7 840.073 94.2847   3
   0   3  -7 763.453 80.4450   5
   0   3  -6 2836.64 186.558   2
   0   3  -6 3220.69 172.534   3
   0   3  -6 2812.95 137.225   1
   0  -3   6 3049.49 178.537   2
   0   3  -6 2768.56 151.501   5
   0  -3   6 3295.48 163.528   5
   0   3  -5 25229.9 505.703   2
   0   3  -5 24344.6 354.333   1
   0  -3   5 24463.6 434.065   5
   0   3  -5 24923.2 443.640   5
   0   3  -5 26093.8 448.716   3
   0   3  -4 34955.6 378.906   1
   0   3  -4 36970.5 495.483   3
   0   3  -4 35718.3 556.622   2
   0   3  -4 35227.7 525.847   5
   0  -3   4 36104.5 522.541   5
   0  -3   3 900.253 86.7466   5
   0   3  -3 909.792 86.7756   5
   0   3  -3 865.829 55.5922   1
   0  -3   3 913.951 77.8690   4
   0   3  -3 811.634 72.7885   3
   0   3  -3 1015.25 91.1988   2
   0  -3   2 25698.4 440.149   5
   0  -3   2 25581.1 396.981   4
   0  -3   2 25997.1 227.813   1
   0   3  -2 25822.1 446.507   5
   0   3  -1 88.0422 31.8685   5
   0  -3   1 84.1717 27.3930   4
   0   3   0 9213.44 265.870   5
   0  -3  -1 13757.3 322.129   5
   0   3   1 14130.2 328.453   5
   0   3   2 5718.71 209.380   5
   0  -3  -2 5791.37 206.767   5
   0   3   3 1613.27 112.996   5
   0  -3  -3 1515.72 110.354   5
   0   3   4 10566.7 252.194   3
   0   3   4 10437.8 282.671   5
   0  -3  -4 10721.7 283.461   5
   0   3   5 567.980 67.3749   3
   0   3   5 537.890 66.3643   5
   0  -3  -5 530.848 68.4533   5
   0   3   6 6465.50 226.205   5
   0   3   6 6601.56 247.469   3
   0  -3  -7 1350.53 102.373   5
   0   3   7 1250.27 100.584   5
   0   3   7 1192.36 140.964   2
   0   3   7 1371.19 124.232   3
   0  -3  -8 8111.96 248.603   5
   0   3   8 8226.95 327.926   3
   0   3   8 8202.89 377.099   2
   0   3   8 7502.02 251.023   5
   0  -3  -9 2302.59 1328.07   5
   0   3   9 2193.09 2144.06   2
   0   3  10 1037.64 158.305   2
   0   3  11 9403.36 478.073   2
   0   3  12 6445.73 416.786   2
   0   3  13 45.5769 69.4625   2
   0   3  14 685.183 156.651   2
   0   3  15 301.228 112.540   2
   0   3  16 1197.58 234.562   2
   0   3  17 441.808 149.580   2
   0  -4  17 92.2029 69.7881   2
   0  -4  16 12.4806 53.9508   2
   0  -4  15 95.1431 63.4218   2
   0  -4  14 36.2047 39.2737   2
   0  -4  13-15.5843 47.2331   2
   0  -4  13 5.31720 20.1470   5
   0  -4  12 1419.11 167.325   2
   0  -4  12 1492.93 123.101   5
   0   4 -12 1331.06 151.495   3
   0   4 -11 2169.74 220.598   2
   0   4 -11 2488.54 197.943   1
   0  -4  11 2408.45 208.768   2
   0   4 -11 2553.63 210.384   4
   0   4 -11 1994.12 167.995   5
   0  -4  11 2306.48 156.713   5
   0   4 -11 2174.35 184.939   3
   0  -4  10 3348.71 238.082   2
   0   4 -10 3379.88 213.227   1
   0   4 -10 3249.39 214.474   3
   0   4 -10 2805.31 191.223   5
   0   4 -10 3434.21 266.606   2
   0   4 -10 2906.56 213.952   4
   0   4  -9-30.0325 41.7125   3
   0   4  -9-6.77407 28.3844   5
   0   4  -9-11.7775 35.3149   4
   0   4  -9-42.7725 29.5755   1
   0   4  -9 48.9569 52.0414   2
   0   4  -8 3071.39 228.612   2
   0   4  -8 2915.14 164.694   1
   0   4  -8 3026.65 187.855   5
   0   4  -8 3496.85 199.655   3
   0   4  -8 2948.26 194.948   4
   0   4  -7 2229.26 184.148   2
   0   4  -7 2383.66 162.633   5
   0   4  -7 2163.43 152.468   3
   0   4  -7 2404.12 136.020   1
   0   4  -6 34335.2 609.427   5
   0   4  -6 34350.8 464.698   1
   0   4  -6 34689.9 681.110   2
   0   4  -5 6768.55 282.959   2
   0   4  -5 7171.57 243.175   3
   0   4  -5 7048.77 274.077   5
   0   4  -5 6733.90 190.975   1
   0   4  -4 16550.4 419.300   5
   0   4  -4 16701.5 353.417   3
   0   4  -4 15568.5 265.711   1
   0   4  -4 17149.8 431.007   2
   0  -4   3 9768.98 159.361   1
   0  -4   3 9388.34 281.176   4
   0   4  -3 9464.47 316.209   5
   0  -4   2 10.8138 22.5412   4
   0  -4   2 8.20753 11.6001   1
   0   4  -2 40.1582 38.7114   5
   0   4  -1 4222.17 211.572   5
   0  -4   1 4170.24 192.389   4
   0   4   0 15316.9 398.082   5
   0   4   1 220.424 53.2662   5
   0  -4  -2 17126.9 418.264   5
   0   4   2 16921.7 418.763   5
   0  -4  -3 5763.53 245.830   5
   0   4   3 6159.04 253.029   5
   0   4   4 112.215 41.1517   5
   0  -4  -4 113.123 43.0024   5
   0   4   5 15978.3 357.505   3
   0  -4  -5 16128.0 411.115   5
   0   4   5 16260.5 416.479   5
   0   4   6 83.1213 34.6547   3
   0  -4  -6 72.1008 34.8566   5
   0   4   6 95.9751 38.9404   5
   0   4   7 1023.16 108.510   5
   0   4   7 1033.99 141.276   2
   0   4   7 1056.77 110.562   3
   0  -4  -7 1081.04 107.404   5
   0   4   8 207.519 62.1207   3
   0  -4  -8 635.864 86.5974   5
   0   4   8 263.968 62.3371   5
   0   4   8 613.235 121.910   2
   0  -4  -9 6555.09 259.564   5
   0   4   9 6784.74 387.757   2
   0   4   9 6047.26 270.376   5
   0  -4 -10 1410.05 117.791   5
   0   4  10 1203.95 172.593   2
   0   4  10 1232.81 127.396   5
   0   4  11 470.365 123.120   2
   0  -4 -11 530.953 71.2839   5
   0   4  12 676.423 147.366   2
   0   4  13 857.223 172.938   2
   0   4  14 3246.91 338.738   2
   0   4  15 305.848 122.061   2
   0   4  16 1571.31 264.113   2
   0   5 -15 1002.96 171.184   4
   0   5 -14 32.5684 48.4085   4
   0   5 -13 240.688 81.1158   4
   0   5 -12 396.941 97.1212   4
   0   5 -12 221.729 71.6044   1
   0   5 -12 298.911 76.5611   3
   0  -5  12 470.782 83.1057   5
   0   5 -11 107.174 51.4855   4
   0   5 -11-54.3094 41.4263   5
   0   5 -11 97.9167 46.2302   1
   0  -5  11 44.1999 29.0377   5
   0   5 -11 27.3295 40.5262   3
   0   5 -10 5098.99 287.256   5
   0   5 -10 5261.13 254.251   1
   0  -5  10 5826.82 289.985   5
   0   5 -10 5088.49 299.316   4
   0   5 -10 5656.59 359.939   2
   0   5 -10 5387.25 279.126   3
   0   5  -9 324.990 65.2206   1
   0   5  -9 313.171 75.0250   3
   0   5  -9 492.494 106.127   2
   0   5  -9 299.875 74.9716   5
   0   5  -9 545.248 102.566   4
   0  -5   9 550.743 92.9610   5
   0   5  -8 8360.55 313.423   3
   0   5  -8 8341.21 397.411   2
   0   5  -8 7279.04 329.376   5
   0   5  -8 7907.72 345.564   4
   0   5  -8 7587.95 260.720   1
   0  -5   8 7825.68 332.547   5
   0   5  -7 10244.7 418.333   2
   0   5  -7 8839.67 264.571   1
   0   5  -7 9461.83 368.848   4
   0  -5   7 9452.56 364.009   5
   0   5  -7 10316.4 332.887   3
   0   5  -7 9213.92 364.963   5
   0   5  -6 5258.70 226.266   3
   0   5  -6 5280.23 285.664   2
   0   5  -6 4789.06 260.454   5
   0   5  -6 5044.57 185.998   1
   0   5  -6 5191.95 267.426   4
   0  -5   6 5166.92 265.631   5
   0   5  -5 24518.3 461.847   3
   0   5  -5 23595.1 578.440   2
   0   5  -5 24272.1 578.239   5
   0   5  -5 24661.6 571.706   4
   0  -5   5 24266.5 565.484   5
   0   5  -4 15901.5 357.982   3
   0  -5   4 15864.1 458.191   5
   0   5  -4 16053.8 470.002   5
   0  -5   4 16679.2 418.942   4
   0   5  -3 11810.4 399.214   5
   0  -5   3 11057.7 381.536   5
   0  -5   3 10903.0 165.651   1
   0  -5   3 11439.9 344.537   4
   0  -5   2 3479.94 191.774   4
   0  -5   2 3686.78 103.298   1
   0   5  -2 3780.56 226.293   5
   0   5  -1 34962.7 676.942   5
   0  -5   1 34571.8 611.381   4
   0   5   0 3262.15 209.540   5
   0   5   1 10611.4 373.512   5
   0   5   2 10579.0 376.402   5
   0  -5  -2 10221.2 363.720   5
   0   5   3 5065.79 262.708   5
   0  -5  -3 4834.20 253.093   5
   0  -5  -4 17.7734 32.4497   5
   0   5   4 80.0772 45.2375   5
   0  -5  -5 332.216 73.8847   5
   0   5   5 330.436 55.1689   3
   0   5   5 273.603 65.1008   5
   0  -5  -6 136.047 45.3136   5
   0   5   6 163.412 50.9640   5
   0   5   6 260.576 54.8623   3
   0   5   7 987.568 122.666   5
   0   5   7 1191.94 121.175   3
   0  -5  -7 958.950 116.011   5
   0   5   8 6485.98 312.842   5
   0   5   8 6754.20 311.116   3
   0  -5  -8 7039.25 308.567   5
   0   5   8 7289.61 408.670   2
   0   5   9 67.5754 41.9623   5
   0   5   9-2.18579 46.3388   2
   0  -5  -9 30.0014 31.5700   5
   0  -5 -10 222.378 62.4681   5
   0   5  10 138.318 49.1315   5
   0   5  10 213.281 92.7073   2
   0  -5 -11 212.777 55.1095   5
   0   5  11 168.435 84.3019   2
   0   5  12 80.0113 75.2253   2
   0   5  13-15.0847 51.0895   2
   0   5  14 380.067 125.822   2
   0   5  15-5.53141 63.3721   2
   0   6 -14 96.9310 53.1048   4
   0  -6  13-28.2518 35.3735   5
   0   6 -13 7.57451 40.9754   4
   0   6 -12 2079.57 192.027   3
   0  -6  12 1995.11 189.408   5
   0   6 -12 1975.37 211.836   4
   0   6 -11-4.96678 49.0891   4
   0  -6  11 53.0699 37.2670   5
   0   6 -11 85.2757 49.4310   3
   0   6 -10 468.099 98.0901   5
   0   6 -10 390.252 69.3380   1
   0   6 -10 533.546 93.6127   3
   0  -6  10 506.866 99.7385   5
   0   6 -10 436.813 95.5700   4
   0  -6   9 323.443 82.7981   5
   0   6  -9 492.328 83.5142   3
   0   6  -9 346.891 65.2196   1
   0   6  -9 652.066 116.330   4
   0   6  -9 441.122 94.8990   5
   0   6  -8 242.854 70.8818   4
   0   6  -8 228.362 61.0866   3
   0   6  -8 196.249 46.6302   1
   0   6  -8 178.855 71.2039   2
   0   6  -8 189.835 68.3556   5
   0  -6   8 172.455 62.9443   5
   0   6  -7 5816.53 342.050   2
   0   6  -7 6254.82 330.890   4
   0   6  -7 6240.56 262.326   3
   0   6  -7 6298.58 220.523   1
   0   6  -7 5879.06 326.758   5
   0  -6   7 6314.85 330.492   5
   0   6  -6 1173.51 152.907   2
   0   6  -6 1351.88 157.660   5
   0  -6   6 2555.02 213.676   5
   0   6  -6 2028.62 148.955   3
   0   6  -5 250.559 70.4000   5
   0   6  -5 303.866 78.0115   2
   0  -6   5 220.320 75.2996   5
   0   6  -5 381.757 63.9230   3
   0  -6   4 13947.0 479.622   5
   0  -6   4 14863.1 434.538   4
   0   6  -4 14502.6 498.921   5
   0   6  -4 14282.2 346.003   3
   0   6  -3 45.8670 44.4213   5
   0  -6   3 31.8598 41.2590   5
   0  -6   3 41.3880 11.6677   1
   0  -6   3 53.8350 33.7311   4
   0  -6   2 2083.56 164.413   4
   0  -6   2 2091.27 78.3469   1
   0  -6   2 1994.55 181.850   5
   0   6  -2 2151.12 190.026   5
   0   6  -1 6548.02 330.052   5
   0  -6   1 6247.33 319.921   5
   0  -6   1 6703.81 298.531   4
   0  -6   1 6096.79 170.329   1
   0  -6   0 1475.67 161.211   5
   0   6   0 1183.54 143.783   5
   0  -6  -1 530.613 99.1849   5
   0   6   1 535.370 98.1160   5
   0  -6  -2 9899.43 399.879   5
   0   6   2 10724.2 422.555   5
   0   6   3 95.3926 47.8912   5
   0  -6  -3 108.895 63.0715   5
   0   6   4 2769.23 146.140   3
   0   6   4 3089.75 231.085   5
   0  -6  -4 2840.63 216.514   5
   0   6   5 414.538 63.9827   3
   0   6   5 378.477 82.5011   5
   0  -6  -5 389.228 83.1900   5
   0   6   6 378.380 87.5845   5
   0   6   6 268.761 56.0301   3
   0  -6  -6 377.384 84.8365   5
   0   6   7 641.238 112.548   5
   0   6   7 594.705 91.1134   3
   0  -6  -7 490.715 93.8809   5
   0   6   8 905.880 160.699   2
   0  -6  -8 723.146 113.829   5
   0   6   8 779.781 111.305   3
   0   6   8 807.028 127.472   5
   0  -6  -9 772.924 113.204   5
   0   6   9 580.503 109.771   5
   0   6  10 1015.75 182.306   2
   0  -6 -10 960.057 124.643   5
   0  -6 -11 56.3052 40.3555   5
   0   6  11 23.0164 61.2915   2
   0   6  12 926.203 188.055   2
   0   6  13 3.46892 59.4772   2
   0   6  14 80.7628 81.5500   2
   0   7 -13-21.0457 55.3747   4
   0  -7  13-21.6388 41.2258   5
   0  -7  12 626.184 119.246   5
   0   7 -12 516.668 123.681   4
   0  -7  11 1950.94 204.786   5
   0   7 -11 1782.58 171.387   3
   0   7 -11 2192.47 229.912   4
   0   7 -10-0.34198 33.6253   4
   0   7 -10 72.0059 49.6099   3
   0  -7   9 1496.68 181.433   5
   0   7  -9 1305.59 134.762   3
   0   7  -9 1693.84 196.231   4
   0  -7   8 1671.22 186.656   5
   0   7  -8 1645.98 143.124   3
   0   7  -7 1492.04 129.133   3
   0  -7   7 1486.66 182.578   5
   0  -7   6 523.390 109.396   5
   0   7  -6 661.463 85.4292   3
   0   7  -5 203.672 47.7643   3
   0  -7   5 54.1212 52.3491   5
   0   7  -4 2178.56 136.167   3
   0  -7   4 2481.74 223.296   5
   0   7  -3 9606.73 277.514   3
   0  -7   3 9415.09 433.459   5
   0  -7   2 676.899 40.0858   1
   0  -7   2 789.846 129.548   5
   0  -7   1 4247.88 287.008   5
   0  -7   1 4305.60 141.415   1
   0  -7   0 2094.96 204.061   5
   0  -7  -1 1514.56 177.429   5
   0  -7  -2-24.5908 50.7103   5
   0  -7  -3 4434.24 301.095   5
   0  -7  -4 19.6129 42.3935   5
   0   7   4 55.2735 24.0551   3
   0   7   5 2325.89 150.148   3
   0  -7  -5 2521.75 223.959   5
   0  -7  -6 116.398 63.9103   5
   0   7   6 209.283 55.7673   3
   0   7   7 227.639 61.5393   3
   0  -7  -7 236.280 75.2341   5
   0  -7  -8 51.0722 51.9812   5
   0   7   9-53.8353 72.2912   2
   0  -7  -9-73.7392 50.4475   5
   0  -7 -10 949.919 136.071   5
   0   7  10 1022.37 193.855   2
   0   7  11 298.683 107.657   2
   0  -7 -11 142.557 58.0358   5
   0   7  12 61.5959 69.3750   2
   0  -8  13 73.4106 72.4200   5
   0   8 -12-182.872 90.8387   4
   0  -8  12-25.5749 46.7526   5
   0  -8  11 104.708 61.3771   5
   0  -8  10-67.9252 61.7722   5
   0   8 -10-59.9502 42.7151   3
   0  -8   9-51.6450 50.5939   5
   0   8  -9 23.0866 32.7236   3
   0  -8   8 245.536 86.9077   5
   0   8  -8 154.197 47.2116   3
   0   8  -7 658.864 86.6179   3
   0  -8   7 537.190 117.419   5
   0  -8   6 180.537 78.0936   5
   0   8  -6 302.572 59.5289   3
   0   8  -5 2679.08 151.115   3
   0  -8   5 2746.47 258.787   5
   0   8  -4 33.5883 26.5018   3
   0  -8   4-86.7238 59.3273   5
   0   8  -3 316.277 49.9937   3
   0  -8   3 114.369 72.7994   5
   0  -8   2 294.716 82.7311   5
   0   8  -2 254.794 42.3634   3
   0  -8   1 39.2199 57.7207   5
   0  -8   1 47.4114 18.3531   1
   0  -8   0 2360.76 240.793   5
   0  -8  -1 88.2595 54.5387   5
   0  -8  -2 119.225 65.5346   5
   0   8   3 4903.86 185.206   3
   0  -8  -3 4547.88 328.704   5
   0  -8  -4 1243.64 175.846   5
   0  -8  -5 726.850 139.402   5
   0  -8  -6 8607.58 448.880   5
   0  -8  -7 142.867 67.6532   5
   0  -8  -8 996.102 155.184   5
   0  -8  -9 251.081 79.3218   5
   0   8   9 559.392 157.080   2
   0   8  10 144.739 96.6296   2
   0  -8 -10 73.5499 60.0864   5
   0  -9  12 328.480 104.769   5
   0  -9  11 1197.09 189.794   5
   0  -9  10-120.993 70.3924   5
   0  -9   9-42.0516 66.7105   5
   0  -9   8 479.207 124.190   5
   0  -9   7 596.642 137.564   5
   0  -9   6 275.414 91.9923   5
   0  -9   5 463.742 118.505   5
   0  -9   4 458.069 131.583   5
   0  -9   3 2581.71 272.220   5
   0  -9   2 207.486 88.3308   5
   0  -9   1 1077.65 178.750   5
   0  -9   0 795.574 153.728   5
   0  -9  -1 1352.60 199.834   5
   0  -9  -2 7.69599 59.2001   5
   0  -9  -3 15.8663 51.5934   5
   0  -9  -4 347.513 108.761   5
   0  -9  -5 40.3573 53.9424   5
   0  -9  -6 450.173 118.130   5
   0  -9  -7 78.2949 79.8506   5
   0  -9  -8 569.125 131.728   5
   0  -9  -9 51.5849 56.0879   5
   0  -9 -10 444.495 118.330   5
   0 -10  11 262.683 102.037   5
   0 -10  10 191.725 71.0709   5
   0 -10   9 605.470 151.130   5
   0 -10   8 357.491 123.770   5
   0 -10   7 75.5033 66.2621   5
   0 -10   6-7.31674 59.7647   5
   0 -10   5-104.587 68.3888   5
   0 -10   4 1402.51 214.598   5
   0 -10   3 23.4190 43.6124   5
   0 -10   2 74.1797 63.9925   5
   0 -10   1 147.928 75.5441   5
   0 -10   0 30.7141 71.5487   5
   0 -10  -1 151.898 58.7042   5
   0 -10  -2 479.102 130.347   5
   0 -10  -3-122.464 86.5931   5
   0 -10  -4 314.780 104.592   5
   0 -10  -5 304.830 107.432   5
   0 -10  -6-81.2355 57.5131   5
   0 -10  -7 0.46856 50.4011   5
   0 -10  -8 23.7309 56.4107   5
   1 -11  -4 285.950 115.877   5
   1 -11  -3-89.0524 81.3534   5
   1 -11  -2 688.915 167.734   5
   1 -11  -1 10.7426 48.8543   5
   1 -11   0 210.685 112.040   5
   1 -11   1 412.492 129.628   5
   1 -11   2 313.221 109.794   5
   1 -11   3 56.2850 56.4304   5
   1 -11   4 177.438 90.7911   5
   1 -11   5 377.133 121.977   5
   1 -10  -9 443.013 119.478   5
   1 -10  -8 692.567 148.564   5
   1 -10  -7 491.382 129.719   5
   1 -10  -6 2221.54 266.372   5
   1 -10  -5 601.054 143.791   5
   1 -10  -4-23.4658 63.2161   5
   1 -10  -3 244.897 87.4122   5
   1 -10  -2 16.6731 63.9896   5
   1 -10  -1 1349.71 204.267   5
   1 -10   0 228.266 92.3265   5
   1 -10   1 640.654 143.034   5
   1 -10   2-51.0529 61.1936   5
   1 -10   3 2815.32 294.233   5
   1 -10   4-110.317 94.7150   5
   1 -10   5 298.856 107.597   5
   1 -10   6 66.7199 45.4011   5
   1 -10   7 72.9565 54.4147   5
   1 -10   8 248.462 90.2601   5
   1 -10   9 102.191 69.5878   5
   1 -10  10 31.1224 47.8496   5
   1 -10  11 147.064 83.5597   5
   1 -10  12-2.34032 38.4167   5
   1  -9 -10 134.070 66.1594   5
   1  -9  -9 128.693 67.0315   5
   1  -9  -8 422.509 112.120   5
   1  -9  -7 61.0687 70.4007   5
   1  -9  -6 1922.61 224.541   5
   1  -9  -5 488.088 119.036   5
   1  -9  -4 1066.55 173.107   5
   1  -9  -3 3032.85 279.012   5
   1  -9  -2-42.4658 58.1992   5
   1  -9  -1-49.3658 73.8976   5
   1  -9   0 866.783 153.256   5
   1  -9   1 155.343 73.3574   5
   1  -9   2 2642.78 260.614   5
   1  -9   3 344.907 100.916   5
   1  -9   4 365.296 111.652   5
   1  -9   5 23.7266 41.4730   5
   1  -9   6 468.356 112.490   5
   1  -9   7 136.731 76.3719   5
   1  -9   8 864.011 150.880   5
   1  -9   9-45.7119 52.0169   5
   1  -9  10 550.813 131.172   5
   1  -9  11 203.326 83.5879   5
   1  -9  12 283.847 97.5098   5
  -1   8  11 211.869 115.551   2
   1  -8 -10 1624.06 188.144   5
  -1   8  10 1999.30 268.449   2
   1  -8  -9 12.5515 46.2749   5
   1  -8  -8 233.917 82.3643   5
   1  -8  -7 2441.45 232.438   5
   1  -8  -6-9.55592 42.6939   5
   1  -8  -5 796.890 135.320   5
  -1   8   4 36.6796 21.2749   3
   1  -8  -4-76.8593 77.9364   5
  -1   8   3 1929.31 101.276   3
   1  -8  -3 2056.36 214.160   5
   1  -8  -2 73.9717 52.6551   5
  -1   8   2 168.757 23.6496   3
   1  -8  -1 145.830 27.9767   1
   1  -8  -1 147.505 65.9525   5
   1  -8   0 163.324 23.1060   1
   1  -8   0 160.601 71.3986   5
   1  -8   0 146.239 18.7948   1
   1  -8   1 2216.07 224.208   5
   1  -8   2 161.004 68.5630   5
   1  -8   3 6261.35 368.474   5
   1  -8   4 323.223 94.6755   5
   1  -8   5 1562.18 187.902   5
   1  -8   6 5860.80 361.277   5
   1  -8   7 19.8009 44.6415   5
   1  -8   8 45.5636 49.7622   5
   1  -8   9 317.209 89.0077   5
   1  -8  10 261.964 88.2157   5
  -1   8 -10 292.980 93.4459   4
  -1   8 -11 232.672 88.8228   4
   1  -8  11 179.220 71.2392   5
  -1   8 -12 1461.17 204.001   4
   1  -8  12 1580.64 195.414   5
  -1   8 -13 42.4746 59.8551   4
   1  -8  13 59.3256 49.4898   5
  -1   7  13 49.6975 63.4885   2
  -1   7  12 10.8740 54.7611   2
   1  -7 -11 104.235 55.4429   5
  -1   7  11 367.963 121.046   2
   1  -7 -10 191.626 65.1824   5
  -1   7  10 151.302 88.2212   2
  -1   7   9 359.317 112.470   2
   1  -7  -9 401.102 93.5869   5
  -1   7   8 412.853 79.9617   3
   1  -7  -8 366.180 83.6859   5
  -1   7   7 321.264 69.0625   3
   1  -7  -7 312.180 85.8611   5
   1  -7  -6 1875.76 186.455   5
  -1   7   6 2029.65 151.389   3
   1  -7  -5 5.78196 41.2160   5
  -1   7   5 60.2314 26.8628   3
  -1   7   4 5642.17 200.581   3
   1  -7  -4 5423.75 313.466   5
   1  -7  -3-32.8825 45.0054   5
  -1   7   3 54.3509 21.8903   3
  -1   7   2 141.600 24.3069   3
   1  -7  -2 60.3694 59.5453   5
   1  -7  -1 520.640 103.516   5
  -1   7   1 366.228 27.4051   3
   1  -7   0 918.003 133.974   5
   1  -7   0 1078.40 54.1353   1
   1  -7   0 1010.45 120.863   4
   1  -7   1 2086.38 167.891   4
   1  -7   1 1806.61 183.139   5
  -1   7  -2 1453.31 50.7396   3
   1  -7   2 1359.52 135.684   4
   1  -7   2 1436.27 161.365   5
   1  -7   3 201.596 73.6814   5
   1  -7   3 266.617 62.6108   4
  -1   7  -3 247.048 30.1818   3
  -1   7  -4 142.415 30.0582   3
   1  -7   4 128.003 62.5057   5
  -1   7  -5 5003.48 173.017   3
   1  -7   5 4621.99 292.216   5
   1  -7   6 19432.1 602.691   5
  -1   7  -6 20322.0 388.609   3
   1  -7   7 1023.37 143.268   5
  -1   7  -7 1206.09 156.199   4
  -1   7  -8 62.0764 44.5231   4
  -1   7  -8 30.2503 17.3316   1
   1  -7   8 24.1900 48.5413   5
   1  -7   9 2117.90 205.447   5
  -1   7  -9 2266.32 219.859   4
  -1   7 -10 425.667 107.308   4
   1  -7  10 367.919 90.2042   5
   1  -7  11 697.491 118.713   5
  -1   7 -11 764.913 135.340   4
   1  -7  12 495.799 101.216   5
  -1   7 -12 673.419 132.798   4
   1  -7  13-31.6619 39.4500   5
  -1   7 -13 68.5593 56.1495   4
  -1   7 -14 626.509 136.089   4
  -1   6  15-67.6241 82.6521   2
  -1   6  14-59.8674 70.5518   2
  -1   6  13-30.8350 68.3832   2
  -1   6  12 278.031 109.640   2
  -1   6  11 119.571 72.6465   2
   1  -6 -11 90.5367 39.5085   5
   1  -6 -10 21.6054 31.5839   5
  -1   6  10 74.7236 75.9259   2
  -1   6   9 196.166 64.9311   3
  -1   6   9 342.124 108.921   2
  -1   6   9 214.826 72.5517   5
   1  -6  -9 291.453 72.1095   5
  -1   6   8 206.239 61.1186   3
  -1   6   8 299.320 86.2359   5
   1  -6  -8 345.733 77.8967   5
  -1   6   7 1121.03 120.794   3
   1  -6  -7 1141.95 130.368   5
  -1   6   7 1145.09 151.417   5
  -1   6   6 176.573 47.3162   3
  -1   6   6 190.460 62.8556   5
   1  -6  -6 200.728 59.2647   5
  -1   6   5 7.53549 23.5397   3
   1  -6  -5 35.4206 44.1394   5
  -1   6   5 1.30444 34.2109   5
   1  -6  -4 1994.11 172.369   5
  -1   6   4 1880.70 114.379   3
  -1   6   4 1928.10 183.040   5
   1  -6  -3 4139.50 247.572   5
  -1   6   3 4012.95 146.313   3
  -1   6   3 4164.92 264.981   5
  -1   6   2 6128.43 319.021   5
   1  -6  -2 5901.30 293.397   5
  -1   6   2 5934.56 145.078   3
   1  -6  -1 13859.4 452.898   5
  -1   6   1 13728.7 168.371   3
  -1   6   1 14185.9 482.373   5
  -1   6   0 210.532 63.3343   5
   1  -6   0 337.401 65.0923   4
  -1   6  -1 23.2389 30.8102   5
   1  -6   1-8.45468 29.9153   4
   1  -6   2 2558.50 198.172   5
  -1   6  -2 2604.32 79.0734   3
   1  -6   2 2421.18 162.994   4
  -1   6  -2 2753.28 214.587   5
  -1   6  -3 3215.99 109.060   3
   1  -6   3 3196.78 218.493   5
   1  -6   3 3098.63 185.957   4
  -1   6  -3 2622.22 211.381   5
  -1   6  -4-24.0983 38.9370   5
   1  -6   4-59.5833 55.8399   5
  -1   6  -4 25.1713 22.2476   3
  -1   6  -4 36.2024 55.6152   2
  -1   6  -5 7657.23 369.211   2
  -1   6  -5 7745.58 222.668   3
  -1   6  -5 7267.51 357.807   5
   1  -6   5 7672.21 339.169   5
  -1   6  -5 7667.29 332.327   4
  -1   6  -6 20.7716 15.0566   1
   1  -6   6 31.5894 34.5997   5
  -1   6  -6 22.6438 23.5558   3
  -1   6  -6-21.1908 43.4120   4
  -1   6  -6 25.3721 34.8073   2
  -1   6  -6 20.1538 38.5674   5
  -1   6  -7 7478.97 211.207   1
  -1   6  -7 7517.13 398.541   2
  -1   6  -7 7206.08 368.339   5
  -1   6  -7 7753.33 263.686   3
   1  -6   7 7770.90 348.302   5
  -1   6  -7 7892.01 351.415   4
  -1   6  -8 30881.6 780.249   5
   1  -6   8 32935.7 715.842   5
  -1   6  -8 32927.3 728.654   4
  -1   6  -8 31618.2 484.104   1
  -1   6  -9 4810.28 289.517   4
  -1   6  -9 4612.70 201.905   1
   1  -6   9 4801.35 277.713   5
  -1   6  -9 4180.91 294.811   5
  -1   6 -10 1195.98 114.254   1
  -1   6 -10 1107.57 146.622   4
   1  -6  10 1176.47 140.829   5
  -1   6 -10 939.160 151.265   5
  -1   6 -11 1048.87 146.597   4
  -1   6 -11 1024.83 118.426   1
   1  -6  11 1183.19 139.795   5
   1  -6  12 206.280 63.4381   5
  -1   6 -12 330.197 87.4899   4
   1  -6  13 95.0477 48.5895   5
  -1   6 -13 43.1171 44.8147   4
  -1   6 -14 537.342 116.589   4
  -1   6 -15-40.1896 53.0597   4
  -1   5  16 37.9414 67.6159   2
  -1   5  15 51.5799 79.7033   2
  -1   5  14 698.741 168.648   2
  -1   5  13-226.876 105.518   2
   1  -5 -12 72.9831 33.5984   5
  -1   5  12 20.6468 60.7251   2
   1  -5 -11 1204.14 117.436   5
  -1   5  11 1217.54 185.975   2
   1  -5 -10 19.8223 28.7690   5
  -1   5  10-53.3551 50.0195   2
  -1   5   9 2851.51 223.293   5
  -1   5   9 3280.64 273.972   2
  -1   5   9 3127.60 231.068   3
   1  -5  -9 3306.98 197.364   5
   1  -5  -8 47.9098 32.8884   5
  -1   5   8 85.6599 43.7485   5
  -1   5   8 13.7190 33.6145   3
  -1   5   7 4858.07 276.227   5
  -1   5   7 4766.37 242.544   3
   1  -5  -7 5141.75 246.259   5
  -1   5   6 9119.26 304.474   3
  -1   5   6 9177.45 369.092   5
   1  -5  -6 9229.34 330.065   5
  -1   5   5 2479.30 143.726   3
  -1   5   5 2306.95 184.255   5
   1  -5  -5 2357.74 169.212   5
  -1   5   4 4515.53 173.687   3
  -1   5   4 4752.53 256.645   5
   1  -5  -4 4855.94 240.167   5
  -1   5   3 3084.53 205.223   5
  -1   5   3 2649.05 117.030   3
   1  -5  -3 2855.78 185.316   5
   1  -5  -2 5116.47 251.218   5
  -1   5   2 4955.16 129.314   3
  -1   5   2 5290.19 265.726   5
  -1   5   1 46.6149 36.2534   5
  -1   5   1 3.66361 8.31236   3
  -1   5   0 3.06814 36.7284   5
   1  -5   1 39733.1 596.742   4
  -1   5  -1 40613.5 731.680   5
  -1   5  -2 1079.60 52.2633   3
   1  -5   2 907.953 88.9371   4
  -1   5  -2 1116.88 126.119   5
   1  -5   3 265.895 49.6120   4
  -1   5  -3 295.438 36.4477   3
  -1   5  -3 178.696 60.8567   5
  -1   5  -4 19.1315 27.4678   5
  -1   5  -4-6.04377 40.9798   2
  -1   5  -4 17.5083 16.0611   3
  -1   5  -5 47.4723 39.9111   2
  -1   5  -5 68.6193 42.5337   5
  -1   5  -5 13.2893 18.4258   3
  -1   5  -5 62.9542 19.1592   1
  -1   5  -5 88.3297 35.1541   4
  -1   5  -6 770.050 117.990   2
  -1   5  -6 737.849 97.1735   4
  -1   5  -6 638.896 57.9568   1
  -1   5  -6 681.455 104.307   5
  -1   5  -6 792.816 78.7208   3
  -1   5  -7-21.2934 41.2559   3
  -1   5  -7-7.28328 17.8277   1
  -1   5  -7 33.9082 51.5893   2
  -1   5  -7-3.86392 29.9615   5
  -1   5  -7-24.5321 39.5679   4
  -1   5  -8 5.84964 35.6388   3
  -1   5  -8 37.1287 26.5392   1
  -1   5  -8 5.64191 34.7709   4
  -1   5  -8 100.178 53.3266   2
  -1   5  -8-1.69148 33.0003   5
  -1   5  -9 5.11162 23.1016   1
  -1   5  -9-28.5174 51.1188   2
  -1   5  -9 5.63370 38.7597   5
  -1   5  -9-27.6704 63.5355   4
  -1   5 -10 904.676 127.444   4
  -1   5 -10 1050.68 118.561   1
  -1   5 -11 7898.54 373.071   4
  -1   5 -11 8615.26 358.130   1
  -1   5 -12 38.6008 43.5275   4
  -1   5 -12 34.4076 35.7317   1
   1  -5  13 2042.01 221.712   2
  -1   5 -13 2090.90 212.838   4
   1  -5  14-9.47711 44.0298   2
  -1   5 -14 22.6462 42.9381   4
  -1   5 -15 105.718 61.1920   4
   1  -5  15 104.544 64.8195   2
   1  -5  16 50.1018 55.1418   2
   1  -5  17 283.077 101.098   2
  -1   4  17 243.489 116.232   2
  -1   4  16 480.915 148.673   2
  -1   4  15 1360.93 222.545   2
  -1   4  14 841.153 172.523   2
  -1   4  13 2222.19 261.453   2
   1  -4 -12 54.8839 23.8810   5
  -1   4  12 137.334 75.6480   2
   1  -4 -11 56.6385 30.2509   5
  -1   4  11 42.1646 50.1441   2
  -1   4  10 2718.22 247.267   2
   1  -4 -10 2926.59 157.438   5
  -1   4   9 103.536 61.7204   2
   1  -4  -9 129.071 39.9992   5
  -1   4   9 118.667 48.3869   3
   1  -4  -8-2.44801 26.2310   5
  -1   4   8-24.1134 35.1667   5
  -1   4   8-27.3486 37.9849   3
  -1   4   8 51.7297 44.9655   2
  -1   4   7 524.733 85.8566   5
  -1   4   7 500.313 80.5905   3
   1  -4  -7 451.805 67.8664   5
  -1   4   6 12943.7 359.263   3
  -1   4   6 12997.8 389.670   5
   1  -4  -6 12861.8 338.565   5
  -1   4   5 192.796 53.1781   5
  -1   4   5 245.375 47.9360   3
   1  -4  -5 245.940 56.3368   5
   1  -4  -4 9389.97 294.164   5
  -1   4   4 9333.85 246.132   3
  -1   4   4 9345.82 317.738   5
   1  -4  -3 1647.13 126.541   5
  -1   4   3 1556.04 86.6974   3
  -1   4   3 1563.40 131.593   5
   1  -4  -2 1613.78 124.285   5
  -1   4   2 1475.60 69.3792   3
  -1   4   2 1645.63 132.584   5
  -1   4   1 7680.88 113.946   3
  -1   4   1 7691.53 282.309   5
  -1   4   0 7666.18 279.974   5
  -1   4  -1 1011.48 105.002   5
   1  -4   1 828.198 75.2287   4
  -1   4  -2 71.6380 38.8123   5
   1  -4   2 110.250 30.8647   4
  -1   4  -2 129.074 19.5901   3
   1  -4   3 5286.13 225.679   5
  -1   4  -3 5292.43 239.802   5
  -1   4  -3 5268.58 140.242   3
  -1   4  -3 5082.49 203.060   4
  -1   4  -3 5248.98 239.366   2
  -1   4  -4 9450.61 216.134   3
  -1   4  -4 9016.76 324.684   2
  -1   4  -4 9151.40 317.292   5
  -1   4  -4 8537.34 154.292   1
   1  -4   4 8930.96 290.461   5
  -1   4  -5 5283.09 266.408   2
  -1   4  -5 5339.21 152.068   1
  -1   4  -5 5186.75 244.912   5
  -1   4  -5 5558.16 187.447   3
   1  -4   5 5824.46 234.189   5
   1  -4   6 11117.4 325.808   5
  -1   4  -6 11010.4 404.071   2
  -1   4  -6 11015.7 286.536   3
  -1   4  -6 10964.6 328.914   4
  -1   4  -6 10390.4 354.838   5
  -1   4  -6 11519.5 259.047   1
  -1   4  -7 691.034 111.450   2
  -1   4  -7 542.975 72.5131   3
  -1   4  -7 673.085 96.7735   5
  -1   4  -7 746.117 78.0283   1
  -1   4  -7 599.854 82.9528   4
   1  -4   7 621.763 80.9974   5
  -1   4  -8 1339.42 138.413   5
  -1   4  -8 1608.23 174.180   2
  -1   4  -8 1734.84 129.228   1
   1  -4   8 1533.93 155.141   2
   1  -4   8 1406.21 117.241   5
   1  -4   9 1098.35 137.816   2
  -1   4  -9 941.162 142.574   2
  -1   4  -9 1240.89 120.791   1
   1  -4   9 1040.77 101.367   5
  -1   4 -10 1208.41 130.462   1
   1  -4  10 1071.82 144.876   2
   1  -4  10 1201.10 108.212   5
  -1   4 -10 1027.39 155.298   2
   1  -4  11 58.5050 59.6964   2
  -1   4 -11-24.5217 34.0348   1
   1  -4  11-19.2153 24.1219   5
   1  -4  12 5353.18 219.408   5
   1  -4  12 5297.97 337.489   2
   1  -4  13-26.2384 20.3307   5
   1  -4  13 80.4579 52.6881   2
   1  -4  14 987.146 163.734   2
   1  -4  15 1741.57 220.335   2
   1  -4  16-7.83631 47.7665   2
   1  -4  17 337.499 123.895   2
   1  -4  18 213.183 96.1618   2
  -1   3  18 145.514 89.0587   2
  -1   3  17 370.538 127.850   2
  -1   3  16 554.618 149.913   2
  -1   3  15 2678.35 298.303   2
  -1   3  14 483.887 135.107   2
  -1   3  13 2101.12 244.275   2
  -1   3  12 125.976 81.6055   2
  -1   3  11 327.342 95.5436   2
   1  -3 -10 5455.17 166.540   5
  -1   3  10 5138.59 318.913   2
  -1   3   9 5729.11 316.475   2
   1  -3  -9 5718.90 184.337   5
  -1   3   9 5684.96 308.237   3
  -1   3   8 304.482 70.5720   3
   1  -3  -8 260.209 40.9475   5
  -1   3   8 293.313 78.3928   2
  -1   3   7 9174.27 331.828   3
   1  -3  -7 9152.08 238.901   5
  -1   3   6 2077.62 139.793   5
  -1   3   6 2261.32 151.306   3
   1  -3  -6 2001.09 115.212   5
   1  -3  -5 589.026 64.0762   5
  -1   3   5 597.294 75.7244   5
  -1   3   5 573.829 70.5668   3
  -1   3   4 981.027 92.8486   5
   1  -3  -4 1001.66 82.2894   5
  -1   3   4 1035.79 83.4775   3
  -1   3   3 34902.0 408.840   3
   1  -3  -3 35452.0 491.051   5
  -1   3   3 34806.0 527.779   5
   1  -3  -2 9951.33 260.810   5
  -1   3   2 9680.49 175.521   3
  -1   3   2 9802.10 275.158   5
  -1   3   1 6387.32 221.997   5
  -1   3   1 6503.22 103.937   3
   1  -3  -1 6924.28 218.802   5
   1  -3   0 212.757 17.9358   1
  -1   3   0 223.251 47.5641   5
   1  -3   1 14994.2 260.736   4
  -1   3  -1 15138.7 346.304   5
  -1   3  -2 9652.03 147.506   3
  -1   3  -2 8753.57 267.388   5
  -1   3  -2 9064.32 221.637   4
   1  -3   2 9000.03 252.808   5
  -1   3  -2 9042.21 265.410   2
  -1   3  -3 14714.1 357.444   2
   1  -3   3 15319.5 329.966   5
  -1   3  -3 15149.0 299.536   4
   1  -3   3 14638.6 276.805   3
  -1   3  -3 15452.0 235.771   3
  -1   3  -3 14306.3 346.359   5
  -1   3  -4 8830.09 302.053   2
   1  -3   4 8153.14 235.010   3
   1  -3   4 8272.84 242.689   5
  -1   3  -4 8365.92 271.485   5
  -1   3  -4 8500.66 203.953   3
   1  -3   4 8225.00 276.137   2
  -1   3  -5 275.196 45.5528   3
   1  -3   5 253.058 58.7607   2
   1  -3   5 268.052 46.7414   5
   1  -3   5 214.574 45.5307   3
  -1   3  -5 251.273 56.4336   5
  -1   3  -5 151.582 46.0783   2
  -1   3  -6 505.502 65.8271   3
  -1   3  -6 609.769 95.1509   2
  -1   3  -6 546.473 79.5421   5
   1  -3   6 592.404 66.8573   5
   1  -3   6 547.761 78.1498   3
   1  -3   7 47.2492 25.9724   5
  -1   3  -7 54.3650 32.7070   2
   1  -3   7 52.1909 31.9907   3
   1  -3   8 1590.86 106.627   5
  -1   3  -8 1636.55 168.936   2
   1  -3   8 1473.83 149.022   3
   1  -3   9 3741.60 253.123   2
   1  -3   9 4029.09 166.574   5
   1  -3   9 4005.16 263.364   3
  -1   3  -9 4028.82 275.659   2
   1  -3  10 83.0961 53.0341   3
   1  -3  10-3.80854 18.5745   5
   1  -3  10 58.3707 50.9677   2
  -1   3 -10-5.05041 34.7062   2
   1  -3  11 94.7876 26.9962   5
  -1   3 -11 125.622 56.3631   2
   1  -3  11 111.602 69.4538   2
   1  -3  12-2.95636 53.3359   2
   1  -3  12 3.88684 13.4193   5
   1  -3  13 217.372 79.4766   2
   1  -3  14 214.947 91.6383   2
   1  -3  15 277.998 100.707   2
   1  -3  16 149.088 75.7622   2
   1  -3  17-92.1732 76.0005   2
   1  -3  18 67.2311 59.7942   2
  -1   2  18 19.1312 62.2707   2
  -1   2  17-139.032 85.5717   2
  -1   2  16 33.9138 59.4220   2
  -1   2  15 206.985 97.2180   2
  -1   2  14 1768.09 225.684   2
  -1   2  13 193.033 79.1139   2
  -1   2  12 1327.40 177.423   2
  -1   2  11 1270.26 166.811   2
  -1   2  10 43.4023 47.3362   2
  -1   2  10 45.7741 39.3680   3
  -1   2   9 194.846 60.2132   2
   1  -2  -9 245.123 23.6712   5
  -1   2   9 201.956 63.8208   3
   1  -2  -8 380.706 36.2857   5
  -1   2   8 410.429 79.1507   3
  -1   2   7 291.478 68.5085   3
   1  -2  -7 260.511 32.6230   5
  -1   2   7 183.515 56.1488   2
  -1   2   6 11926.0 349.777   3
   1  -2  -6 11817.8 215.425   5
   1  -2  -6 11660.7 306.742   3
  -1   2   6 11902.4 344.581   2
   1  -2  -5 349.202 40.0935   5
   1  -2  -5 301.684 47.3907   3
  -1   2   5 265.623 52.5735   3
   1  -2  -4 550.012 50.8318   5
   1  -2  -4 618.553 60.2120   3
  -1   2   4 540.053 61.8971   3
   1  -2  -3 31002.0 379.917   5
  -1   2   3 30245.5 391.391   3
   1  -2  -3 31207.9 354.503   3
  -1   2   3 31133.0 439.201   5
   1  -2  -2 307563. 1219.74   5
   1  -2  -2 306789. 924.861   3
   1  -2  -1 7436.66 107.557   3
   1  -2  -1 7578.57 196.718   5
   1  -2  -1 7386.17 131.403   1
  -1   2   1 7504.64 211.389   5
  -1   2   0 1528.76 98.2815   5
   1  -2   1 40194.9 226.695   3
  -1   2  -1 40303.0 337.690   4
   1  -2   1 38906.3 324.399   4
  -1   2  -1 38640.5 494.075   5
  -1   2  -2 195843. 1092.10   2
   1  -2   2 196523. 1008.97   5
   1  -2   2 195968. 723.836   3
   1  -2   3 20.6451 17.2095   3
   1  -2   3 6.90122 22.8983   5
  -1   2  -3 29.8534 25.5553   2
  -1   2  -3 57.6365 33.7044   5
   1  -2   3 57.9210 33.8490   2
   1  -2   4 37838.5 566.671   2
   1  -2   4 38331.5 471.163   3
  -1   2  -4 37845.7 590.983   2
   1  -2   4 38942.6 439.402   5
   1  -2   5 53900.7 737.280   2
   1  -2   5 55265.2 643.504   3
   1  -2   5 54713.0 511.397   5
  -1   2  -5 53865.3 767.415   2
   1  -2   6 458.938 49.4227   5
   1  -2   6 433.413 65.5018   3
  -1   2  -6 460.850 81.8196   2
   1  -2   6 381.628 82.1723   2
   1  -2   7 14174.3 252.266   5
  -1   2  -7 14112.2 443.761   2
   1  -2   7 14468.8 402.385   3
   1  -2   8 17638.5 488.086   3
  -1   2  -8 17631.3 522.446   2
   1  -2   8 16684.0 266.399   5
   1  -2   9 1608.78 171.873   2
   1  -2   9 1657.38 79.2329   5
   1  -2   9 1653.15 161.339   3
  -1   2  -9 1727.68 173.169   2
  -1   2 -10 1068.72 144.587   2
   1  -2  10 938.098 51.4135   5
   1  -2  10 1068.03 147.815   2
   1  -2  10 1095.30 144.561   3
   1  -2  11 838.689 141.576   2
  -1   2 -11 884.544 140.637   2
   1  -2  12 23.0828 61.9527   2
   1  -2  13 1007.06 168.095   2
   1  -2  14 158.744 79.7552   2
   1  -2  15 118.589 89.9394   2
   1  -2  16 57.5355 65.4687   2
   1  -2  17-7.36045 51.1999   2
   1  -2  18-100.300 77.9712   2
  -1   1  18 38.5164 71.1786   2
  -1   1  17 861.576 181.183   2
  -1   1  16 262.436 103.637   2
  -1   1  15 210.280 95.4078   2
  -1   1  14 155.558 69.4328   2
  -1   1  13 366.053 104.652   2
  -1   1  12 3078.59 260.994   2
  -1   1  11 3510.48 261.608   2
  -1   1  10 7083.98 381.297   3
  -1   1  10 7545.46 353.813   2
   1  -1 -10 6835.98 288.956   1
   1  -1 -10 7112.26 309.331   3
   1  -1  -9 13001.0 396.721   3
  -1   1   9 13434.7 485.643   3
  -1   1   8 97.2297 48.0474   3
  -1   1   8 93.6553 42.5839   2
  -1   1   7 6042.53 282.035   3
  -1   1   7 5732.36 245.944   2
   1  -1  -6 15072.8 166.049   5
  -1   1   6 14683.6 354.386   2
  -1   1   6 14965.2 409.293   3
   1  -1  -5 10026.3 272.187   3
  -1   1   5 9786.27 259.973   2
  -1   1   5 9870.20 303.853   3
   1  -1  -5 10208.5 164.130   5
  -1   1   4 15517.4 283.638   2
   1  -1  -4 15433.1 309.437   3
  -1   1   4 15664.4 346.915   3
   1  -1  -4 15351.3 291.742   1
   1  -1  -4 16116.6 234.878   5
   1  -1  -3 9127.34 213.908   3
   1  -1  -3 9179.77 202.428   1
   1  -1  -2 50880.5 405.529   1
   1  -1  -2 50153.3 452.609   3
  -1   1  -2 33554.1 426.798   2
  -1   1  -3 6570.82 213.214   2
   1  -1   4 42507.7 483.950   3
  -1   1  -4 42717.7 600.668   2
   1  -1   4 43419.8 612.304   2
   1  -1   5 904.996 60.6481   5
   1  -1   5 897.734 101.342   2
   1  -1   5 1013.63 85.8777   3
  -1   1  -5 862.046 95.4860   2
  -1   1  -6 1054.19 112.095   2
   1  -1   6 1007.57 55.9668   5
   1  -1   6 878.215 108.624   2
   1  -1   6 1008.52 96.1737   3
   1  -1   7 3168.74 85.5536   5
  -1   1  -7 3192.42 205.859   2
   1  -1   7 3313.02 187.684   3
   1  -1   8 4233.70 230.804   3
  -1   1  -8 3688.05 232.608   2
   1  -1   9 4850.10 269.747   3
   1  -1   9 4482.61 285.198   2
  -1   1  -9 4914.98 284.071   2
   1  -1  10 3750.66 277.818   2
   1  -1  10 4216.56 272.296   3
  -1   1 -10 3774.53 266.069   2
  -1   1 -11 748.910 127.261   2
   1  -1  11 750.176 137.375   2
   1  -1  12 215.880 88.3393   2
   1  -1  13 268.452 104.292   2
   1  -1  14 115.471 75.4429   2
   1  -1  15 1101.45 192.738   2
   1  -1  16 918.606 178.485   2
   1  -1  17 231.341 107.567   2
   1  -1  18-116.448 83.7222   2
  -1   0  18-94.1969 73.2958   2
  -1   0  17 138.871 68.5581   2
  -1   0  16 77.6608 73.4355   2
  -1   0  15 838.045 155.563   2
  -1   0  14 474.265 119.972   2
  -1   0  13 210.965 82.8598   2
  -1   0  12-43.3412 48.2296   2
   1   0 -12-7.26085 52.9393   3
   1   0 -11 449.087 87.4004   3
   1   0 -11 442.293 84.1159   2
  -1   0  11 551.405 110.232   2
   1   0 -10 3673.88 222.091   2
   1   0 -10 3755.12 227.495   3
   1   0 -10 3517.36 214.707   1
   1   0  -9 3125.78 192.889   1
   1   0  -9 2842.70 182.569   2
   1   0  -8 1240.75 114.215   2
   1   0  -8 1482.21 126.089   1
  -1   0   8 1208.19 126.329   2
   1   0  -7 21002.9 438.432   1
  -1   0   7 20963.4 458.129   2
   1   0  -7 20546.6 415.621   2
   1   0  -6 2821.01 149.724   1
   1   0  -6 2649.77 70.9697   5
   1   0  -6 2652.30 137.608   2
  -1   0   6 2852.06 153.794   2
   1   0  -5 259.620 25.3084   5
   1   0  -5 259.396 44.8282   1
   1   0  -5 232.073 37.7523   2
  -1   0   5 333.655 48.9691   2
   1   0  -4 31085.5 408.786   1
   1   0  -4 31138.6 277.081   5
  -1   0   4 31201.0 377.995   2
   1   0  -4 30723.8 354.360   2
   1   0  -3 9932.91 160.396   2
   1   0  -3 10177.9 208.997   1
  -1   0   3 10318.7 170.111   2
   1   0  -2 3508.57 108.133   1
  -1   0  -2 88485.7 664.662   2
  -1   0  -3 29339.0 437.623   2
   1   0   4 55690.9 391.477   5
  -1   0  -4 53407.1 658.299   2
  -1   0  -5 2437.60 154.002   2
   1   0   5 2503.01 162.683   2
   1   0   5 2378.88 129.982   3
   1   0   5 2516.31 83.9679   5
   1   0   6 11133.2 167.350   5
   1   0   6 10515.1 356.536   2
  -1   0  -6 10880.5 353.733   2
   1   0   6 11685.1 317.963   3
   1   0   7 1758.40 136.683   3
   1   0   7 1613.73 55.9502   5
  -1   0  -7 1571.22 143.716   2
  -1   0  -8 6356.71 303.899   2
   1   0   8 6946.21 293.956   3
   1   0   9 11318.3 404.802   3
   1   0   9 9964.63 424.343   2
  -1   0  -9 10772.0 413.790   2
   1   0  10 1176.48 159.547   2
  -1   0 -10 1245.69 152.548   2
   1   0  11 2910.28 262.126   2
   1   0  12 10597.9 520.036   2
   1   0  13 190.056 84.6348   2
   1   0  14 155.189 91.1979   2
   1   0  15 137.957 85.7577   2
   1   0  16 63.5566 66.0837   2
   1   0  17 52.4149 73.0692   2
   1   0  18 603.986 168.678   2
  -1  -1  17-54.1486 53.3134   2
  -1  -1  16 501.386 119.183   2
  -1  -1  15 155.033 78.4259   2
  -1  -1  14 309.332 98.7956   2
  -1  -1  13 65.5082 60.4229   2
   1   1 -13-75.7830 43.8380   2
   1   1 -13-36.3425 61.1170   3
  -1  -1  12 994.485 141.981   2
   1   1 -12 1199.54 147.442   3
   1   1 -12 873.052 121.794   2
   1   1 -11 253.978 62.3774   2
  -1  -1  11 190.653 62.9549   2
   1   1 -11 183.395 62.0683   3
   1   1 -10 4296.36 243.202   2
   1   1 -10 4232.72 242.384   1
   1   1 -10 4329.78 247.015   3
   1   1  -9 416.348 72.9749   1
   1   1  -9 297.809 67.2391   3
   1   1  -9 357.635 69.7045   2
   1   1  -9 288.094 30.4773   5
  -1  -1   9 280.227 66.5758   2
   1   1  -8 5353.19 240.252   2
   1   1  -8 5155.59 131.836   5
  -1  -1   8 5167.02 239.457   2
   1   1  -7 11885.5 328.648   2
  -1  -1   7 11875.1 330.607   2
   1   1  -7 12597.9 339.708   1
   1   1  -6 35873.1 533.510   1
   1   1  -6 35771.3 527.561   2
   1   1  -6 35154.6 373.156   5
  -1  -1   6 36051.3 518.287   2
   1   1  -5 2390.48 122.981   2
   1   1  -5 2522.62 102.628   5
   1   1  -5 2632.40 132.224   1
  -1  -1   5 2680.06 107.834   5
  -1  -1   5 2559.41 123.384   2
   1   1  -4 1590.08 83.2848   5
  -1  -1   4 1722.83 87.0009   5
   1   1  -4 1523.32 90.6848   1
   1   1  -4 1600.29 89.7193   2
  -1  -1   4 1799.65 95.6092   1
  -1  -1   4 1682.38 85.2792   2
   1   1  -3 28076.5 310.251   2
   1   1  -3 28744.3 361.972   4
   1   1  -3 28151.1 355.203   5
  -1  -1   3 28918.1 343.444   1
  -1  -1   3 29057.5 355.406   5
   1   1  -3 27524.0 353.708   1
  -1  -1   2 27770.2 349.605   5
   1   1  -2 27384.2 354.831   5
   1   1  -2 28393.2 334.746   1
  -1  -1   2 27832.3 322.869   4
  -1  -1   2 27581.7 318.417   1
  -1  -1   1 37870.6 367.437   1
   1   1  -1 36909.0 408.995   5
   1   1   0 173863. 888.538   5
  -1  -1  -1 58430.6 509.928   5
   1   1   1 57592.1 513.313   5
   1   1   2 28764.5 360.444   5
  -1  -1  -2 28202.0 356.292   5
   1   1   3 1395.98 79.8298   5
  -1  -1  -3 1342.86 78.0564   5
  -1  -1  -4 749.618 58.4772   5
   1   1   4 842.894 61.8555   5
  -1  -1  -5 9332.34 308.679   2
   1   1   5 9112.64 200.575   5
  -1  -1  -6 996.543 108.409   2
   1   1   6 944.751 92.7049   3
   1   1   6 881.616 62.2276   5
   1   1   7 12368.3 359.622   3
  -1  -1  -7 12080.9 399.434   2
   1   1   7 11228.5 210.620   5
   1   1   8 17189.4 240.910   5
   1   1   8 18007.3 468.741   3
   1   1   9 3556.25 226.604   3
   1   1   9 3031.32 238.458   2
   1   1   9 3179.76 89.2349   5
   1   1  10 1150.49 159.706   2
   1   1  11 3723.17 296.569   2
   1   1  12 4687.08 352.669   2
   1   1  13 6425.00 431.868   2
   1   1  14 144.137 88.7130   2
   1   1  15 2306.52 288.409   2
   1   1  16-98.8668 79.8690   2
   1   1  17 181.628 110.435   2
  -1  -2  17 1111.60 179.626   2
  -1  -2  16 273.894 92.0291   2
  -1  -2  15 161.927 71.8802   2
   1   2 -14 1764.47 196.475   3
  -1  -2  14 2089.50 213.089   2
   1   2 -13 21.4303 56.7815   3
  -1  -2  13 87.9337 54.2481   2
   1   2 -13 202.425 63.2663   2
   1   2 -12 461.410 94.2265   2
   1   2 -12 383.632 88.2679   3
  -1  -2  12 580.538 109.902   2
   1   2 -11 34.5586 19.0269   5
   1   2 -11 40.4591 34.3605   1
   1   2 -11 45.8384 40.1455   2
  -1  -2  11-14.1233 41.6934   2
   1   2 -11 66.1023 46.7345   3
   1   2 -10-43.3977 31.7582   2
   1   2 -10 63.5850 27.0288   5
   1   2 -10-0.63396 28.8771   1
   1   2 -10 26.4675 30.8246   3
   1   2  -9 43.0903 32.1653   1
   1   2  -9 48.5914 37.2548   2
   1   2  -9 40.3517 22.0096   5
  -1  -2   9-6.49147 26.7790   2
   1   2  -9 46.7449 37.6569   3
  -1  -2   8 215.870 41.9628   5
   1   2  -8 218.657 39.0512   5
   1   2  -8 227.067 60.3593   3
  -1  -2   8 195.686 51.6212   2
   1   2  -8 170.771 52.1675   2
   1   2  -8 308.180 60.7762   1
   1   2  -7 2661.30 130.283   5
  -1  -2   7 2953.88 160.098   2
   1   2  -7 2800.84 161.137   1
   1   2  -7 2638.46 175.996   3
   1   2  -7 2719.27 170.468   2
  -1  -2   7 2663.43 135.897   5
   1   2  -6 713.648 81.2261   2
  -1  -2   6 705.086 71.1823   5
   1   2  -6 771.761 77.3407   1
   1   2  -6 741.761 70.5385   5
   1   2  -6 775.205 94.1647   3
  -1  -2   6 733.256 75.9377   2
   1   2  -5 688.314 74.3085   2
   1   2  -5 643.360 66.1879   1
  -1  -2   5 693.920 71.8150   5
   1   2  -5 692.891 88.5014   3
   1   2  -5 770.858 72.1449   5
  -1  -2   4 30376.3 456.190   5
   1   2  -4 29866.0 443.132   5
   1   2  -4 29843.0 415.700   1
  -1  -2   4 29199.6 387.431   1
   1   2  -4 29851.2 422.557   2
   1   2  -3 3659.34 137.614   1
  -1  -2   3 3838.86 164.121   5
   1   2  -3 3623.53 154.799   5
  -1  -2   3 3654.93 127.200   1
  -1  -2   3 3824.05 150.588   4
  -1  -2   2 60617.1 592.598   4
  -1  -2   2 59839.2 640.196   5
  -1  -2   2 59713.6 513.316   1
   1   2  -2 59534.9 624.939   5
   1   2  -1 6718.64 212.738   5
   1   2   0 39739.5 515.604   5
  -1  -2  -1 3289.30 152.320   5
   1   2   1 3191.35 145.896   5
  -1  -2  -2 110447. 873.572   5
   1   2   2 110044. 851.383   5
   1   2   3 4899.60 179.555   5
  -1  -2  -3 5013.62 187.143   5
  -1  -2  -4 112.460 34.3228   5
   1   2   4 181.173 36.6097   5
  -1  -2  -5 8436.64 241.076   5
   1   2   5 8460.63 234.785   5
   1   2   6 10586.8 260.916   5
  -1  -2  -6 10924.4 274.153   5
   1   2   7 9697.00 248.351   5
  -1  -2  -7 10148.8 260.413   5
   1   2   7 10418.4 336.691   3
   1   2   8 7367.61 214.107   5
   1   2   8 7758.81 313.395   3
   1   2   8 7239.01 359.456   2
   1   2   9 725.690 124.587   2
   1   2   9 604.068 59.8219   5
   1   2   9 689.403 103.476   3
   1   2  10 277.653 89.7696   2
   1   2  10 248.549 38.5789   5
   1   2  11 8897.86 469.292   2
   1   2  12 2615.18 268.358   2
   1   2  13 3817.45 342.752   2
   1   2  14 6170.79 452.550   2
   1   2  15 23.2807 70.0590   2
   1   2  16 1976.98 280.845   2
   1   2  17-23.1876 65.0890   2
  -1  -3  16 73.6773 58.6068   2
  -1  -3  15 345.964 89.0480   2
  -1  -3  14 396.807 98.8010   2
   1   3 -14 563.617 113.300   3
   1   3 -13 4160.66 297.722   2
  -1  -3  13 4483.20 284.902   2
   1   3 -12 2672.81 228.493   2
  -1  -3  12 3123.31 226.987   2
   1   3 -12 2693.63 163.575   5
   1   3 -12 2928.84 229.533   3
  -1  -3  11 606.533 101.215   2
   1   3 -11 531.369 99.2775   3
   1   3 -11 533.753 96.9306   2
   1   3 -11 799.178 116.846   1
   1   3 -11 580.364 76.2214   5
   1   3 -10 845.690 91.2631   5
   1   3 -10 782.053 111.260   4
   1   3 -10 877.730 122.793   2
   1   3 -10 868.708 114.358   1
   1   3 -10 874.198 119.559   3
  -1  -3  10 853.892 89.7168   5
   1   3  -9 6649.01 296.031   4
   1   3  -9 6169.06 298.381   3
   1   3  -9 7029.27 290.522   1
   1   3  -9 6280.74 309.450   2
  -1  -3   9 6556.44 248.565   5
   1   3  -9 6022.11 233.065   5
   1   3  -8 6763.40 296.254   3
   1   3  -8 6130.65 253.931   1
   1   3  -8 6585.84 301.385   2
   1   3  -8 6344.80 276.503   4
   1   3  -8 6330.84 238.953   5
  -1  -3   8 6217.44 245.453   5
  -1  -3   7 2547.49 157.026   5
   1   3  -7 2325.80 146.877   1
   1   3  -7 2536.87 174.920   2
   1   3  -7 2524.66 152.092   5
   1   3  -7 2519.56 177.346   3
   1   3  -6 83.3042 31.7720   5
  -1  -3   6 69.7697 33.1123   5
   1   3  -6 62.9279 45.4138   3
   1   3  -6 57.8749 23.3258   1
   1   3  -6 75.6280 33.9071   2
   1   3  -5 3760.23 184.176   2
   1   3  -5 4211.39 196.162   5
   1   3  -5 4231.86 173.583   1
  -1  -3   5 4230.30 159.452   1
  -1  -3   5 4205.39 201.294   5
   1   3  -4 24589.9 441.522   2
  -1  -3   4 24966.6 449.929   4
   1   3  -4 23133.1 390.748   1
   1   3  -4 23696.4 463.571   5
  -1  -3   4 24276.2 483.117   5
  -1  -3   4 24208.5 354.182   1
  -1  -3   3 181901. 928.670   1
  -1  -3   3 179717. 1190.67   4
  -1  -3   3 178835. 1303.81   5
   1   3  -3 178182. 1275.63   5
   1   3  -2 11963.3 332.717   5
  -1  -3   2 12698.7 253.202   1
  -1  -3   2 12413.4 315.928   4
   1   3  -1 1471.51 118.016   5
   1   3   0 33864.2 556.910   5
   1   3   1 2005.11 136.828   5
  -1  -3  -2 209.365 52.3200   5
   1   3   2 230.481 51.6207   5
  -1  -3  -3 6402.78 246.872   5
   1   3   3 5708.88 228.861   5
  -1  -3  -4 54298.3 717.697   5
   1   3   4 54269.9 701.094   5
  -1  -3  -5 18478.7 419.414   5
   1   3   5 17671.7 400.360   5
  -1  -3  -6 77.3299 36.9804   5
   1   3   6 52.1843 29.4998   5
   1   3   7 16546.3 432.169   3
  -1  -3  -7 16027.3 387.499   5
   1   3   7 15545.1 525.666   2
   1   3   7 15723.3 378.400   5
   1   3   8-1.94007 22.7645   3
   1   3   8-9.02396 52.3240   2
  -1  -3  -8-92.2487 37.1830   5
   1   3   8-24.1649 23.3332   5
   1   3   9 1176.34 103.446   5
   1   3   9 1273.17 173.175   2
   1   3  10 783.353 85.0357   5
   1   3  10 750.140 143.747   2
   1   3  11 22.8387 62.1356   2
   1   3  11 103.493 34.3265   5
   1   3  12 74.7053 67.1420   2
   1   3  13-53.9969 63.4913   2
   1   3  14 102.925 70.6734   2
   1   3  15 133.628 96.8625   2
   1   3  16 153.271 98.2287   2
   1   4 -16 662.900 150.199   4
   1   4 -15 14.6174 46.2400   3
   1   4 -15-8.88368 45.3419   4
   1   4 -14 1100.00 166.510   4
   1   4 -14 753.747 130.852   3
   1   4 -13 431.157 96.0679   3
   1   4 -13 534.596 118.806   4
   1   4 -12 120.215 53.0424   2
   1   4 -12 115.064 43.5595   5
   1   4 -12 216.605 76.1037   4
   1   4 -12 91.4689 55.9774   3
   1   4 -11 4246.51 233.731   5
   1   4 -11 4743.71 307.460   2
   1   4 -11 5028.91 292.206   3
   1   4 -11 5168.89 303.167   4
   1   4 -11 4735.32 274.696   1
   1   4 -10 24157.3 624.596   4
   1   4 -10 21111.5 510.377   5
   1   4 -10 24613.2 620.518   3
   1   4 -10 22845.7 563.823   1
   1   4 -10 22595.1 647.356   2
   1   4  -9 7761.84 307.787   5
   1   4  -9 8742.59 388.712   2
   1   4  -9 9311.67 372.745   4
   1   4  -9 8746.42 362.849   3
   1   4  -9 7955.01 309.270   1
   1   4  -8 154.174 53.8822   2
   1   4  -8 141.663 46.6100   5
   1   4  -8 139.843 49.9096   4
   1   4  -8 44.9336 31.2727   1
   1   4  -8 120.515 54.3888   3
   1   4  -7 6446.09 299.323   2
   1   4  -7 6606.24 292.669   3
   1   4  -7 6495.63 279.063   5
   1   4  -7 6202.37 242.516   1
   1   4  -7 6440.69 292.552   4
   1   4  -6 12657.4 327.890   1
   1   4  -6 12216.0 397.074   3
   1   4  -6 12124.6 381.359   5
   1   4  -6 12405.5 389.566   2
   1   4  -5 53.2361 33.6857   5
   1   4  -5 162.067 51.1266   2
  -1  -4   5 132.640 32.5595   1
   1   4  -5 32.0362 24.0217   1
  -1  -4   4 7010.10 264.844   4
   1   4  -4 6535.89 279.403   5
  -1  -4   4 6446.13 186.694   1
  -1  -4   3 507.198 74.9119   4
  -1  -4   3 489.160 53.0003   1
   1   4  -3 558.845 84.4547   5
  -1  -4   2 6314.01 190.251   1
   1   4  -2 6071.72 267.530   5
  -1  -4   2 5922.35 246.068   4
   1   4  -1 17395.7 449.727   5
   1   4   0 61961.5 848.896   5
   1   4   1 5481.46 254.157   5
   1   4   2 4572.83 232.603   5
  -1  -4  -2 4251.62 231.553   5
  -1  -4  -3 230.439 60.4285   5
   1   4   3 193.029 50.7416   5
   1   4   4 3209.16 195.386   5
  -1  -4  -4 3121.14 198.264   5
  -1  -4  -5-15.4820 31.4903   5
   1   4   5 3.34247 26.2940   5
   1   4   6 611.363 111.063   2
  -1  -4  -6 471.158 79.4861   5
   1   4   6 450.939 74.7948   5
   1   4   7 202.613 72.8003   2
   1   4   7 125.167 45.4753   5
   1   4   7 166.878 49.2024   3
  -1  -4  -7 208.453 55.2970   5
   1   4   8 33.9886 50.5891   2
   1   4   8 46.3222 36.9900   5
   1   4   8 97.0039 42.7246   3
  -1  -4  -8 16.1723 24.9607   5
   1   4   9 143.098 68.3349   2
   1   4   9 113.499 46.9291   5
  -1  -4  -9 99.0625 40.0253   5
   1   4  10 1303.64 191.799   2
   1   4  10 1253.82 127.652   5
   1   4  11 50.3588 32.5459   5
   1   4  11 61.4966 61.0060   2
   1   4  12 993.208 179.842   2
   1   4  13 159.247 84.8682   2
   1   4  14 69.1838 78.4541   2
   1   4  15-4.26878 62.1716   2
   1   5 -15-65.0646 51.4555   3
   1   5 -15 117.779 67.4250   4
   1   5 -14 639.762 132.308   4
   1   5 -14 218.572 80.8666   3
   1   5 -13 2890.13 262.709   4
   1   5 -13 2739.40 234.185   3
  -1  -5  13 2646.18 196.857   5
   1   5 -12 1323.73 169.865   4
   1   5 -12 1313.92 158.752   3
  -1  -5  12 1236.36 141.294   5
   1   5 -11 148.185 59.9642   3
   1   5 -11 132.928 57.5109   4
   1   5 -11 74.9007 45.4291   2
   1   5 -11 208.019 63.3683   5
  -1  -5  11 120.662 50.2081   5
   1   5 -11 104.305 46.0317   1
  -1  -5  10 1857.41 173.221   5
   1   5 -10 1382.27 170.563   2
   1   5 -10 1803.73 175.141   3
   1   5 -10 1422.68 146.551   1
   1   5 -10 1497.57 157.430   5
   1   5 -10 2025.89 195.152   4
  -1  -5   9 836.729 119.788   5
   1   5  -9 1206.92 137.960   5
   1   5  -9 1323.87 146.870   3
   1   5  -9 1141.35 144.019   4
   1   5  -9 1081.26 147.255   2
   1   5  -9 948.284 112.426   1
   1   5  -8 25872.4 630.089   5
   1   5  -8 26632.5 667.922   4
   1   5  -8 26513.7 622.568   3
   1   5  -8 23882.4 651.840   2
   1   5  -8 24113.7 514.061   1
  -1  -5   8 26382.4 641.886   5
   1   5  -7 21156.1 582.090   2
   1   5  -7 21568.2 574.219   5
   1   5  -7 21159.9 458.207   1
  -1  -5   7 21725.0 585.520   5
   1   5  -7 22527.8 551.846   3
   1   5  -7 21872.0 595.088   4
   1   5  -6 3431.90 225.815   2
   1   5  -6 3765.54 239.732   5
  -1  -5   6 2988.60 217.376   5
   1   5  -6 3304.69 212.042   3
   1   5  -5 6303.17 309.989   5
  -1  -5   5 6261.06 191.451   1
  -1  -5   5 6763.01 290.917   4
   1   5  -5 6394.63 301.377   2
  -1  -5   5 6441.58 316.886   5
  -1  -5   4 20446.1 558.030   5
  -1  -5   4 21809.7 515.799   4
  -1  -5   4 19619.9 328.831   1
   1   5  -4 21161.0 559.281   5
  -1  -5   3 0.36025 29.7209   4
  -1  -5   3 46.3518 42.2523   5
   1   5  -3 2.82110 27.6972   5
  -1  -5   3 16.8316 18.3835   1
  -1  -5   2 962.300 81.4366   1
  -1  -5   2 1150.00 121.223   4
   1   5  -2 1177.45 131.176   5
   1   5  -1 3514.17 229.545   5
   1   5   0 1929.54 169.357   5
   1   5   1 749.163 107.505   5
  -1  -5  -1 703.082 107.632   5
   1   5   2 37807.5 749.154   5
  -1  -5  -2 36970.5 741.544   5
  -1  -5  -3 3883.21 245.589   5
   1   5   3 4336.11 254.981   5
  -1  -5  -4 14091.2 460.518   5
   1   5   4 14438.7 466.298   5
  -1  -5  -5 2105.73 181.041   5
   1   5   5 2157.78 182.915   5
   1   5   6-34.4837 37.8926   5
  -1  -5  -6 26.4466 44.2872   5
  -1  -5  -7 1474.64 152.704   5
   1   5   7 1520.37 156.791   5
   1   5   7 1434.33 137.668   3
   1   5   7 1716.54 202.785   2
   1   5   8 28.6634 28.2049   3
   1   5   8 73.0938 48.1838   5
  -1  -5  -8 30.4560 39.2009   5
   1   5   9 247.013 66.1159   5
   1   5   9 354.674 108.746   2
  -1  -5  -9 336.755 75.4963   5
   1   5  10 276.998 103.801   2
   1   5  10 350.397 79.5088   5
  -1  -5 -10 328.860 73.8488   5
   1   5  11 476.423 138.693   2
   1   5  12 370.608 131.609   2
   1   5  13 402.465 143.313   2
   1   5  14 387.718 139.733   2
   1   6 -14 1228.58 188.860   4
   1   6 -14 1056.61 154.948   3
   1   6 -13 531.813 122.910   4
  -1  -6  13 551.869 105.864   5
   1   6 -13 712.420 124.852   3
   1   6 -12 445.893 110.232   4
   1   6 -12 375.867 93.2730   3
  -1  -6  12 213.009 68.7220   5
  -1  -6  11 414.436 87.9824   5
   1   6 -11 628.006 124.807   4
   1   6 -11 548.730 103.098   3
  -1  -6  10 574.935 109.513   5
   1   6 -10 431.011 100.132   4
   1   6 -10 352.889 83.2315   3
   1   6 -10 328.838 72.4280   1
   1   6  -9-82.5539 49.7518   4
  -1  -6   9-32.6242 44.0015   5
   1   6  -9-32.8403 31.8428   2
   1   6  -9 7.24041 20.9889   1
   1   6  -9 22.6659 41.2541   3
   1   6  -8 2049.18 205.826   2
  -1  -6   8 2123.87 202.494   5
   1   6  -8 2308.08 187.757   3
   1   6  -7 6105.55 340.409   2
  -1  -6   7 6025.15 339.739   5
   1   6  -7 6451.97 304.034   3
   1   6  -6 3905.81 235.973   3
   1   6  -6 3864.45 264.028   2
  -1  -6   6 4151.80 281.213   5
  -1  -6   5 17737.7 575.842   5
  -1  -6   5 17571.7 316.204   1
  -1  -6   4 296.148 82.9797   5
  -1  -6   4 254.099 37.6411   1
  -1  -6   3 2971.51 131.134   1
  -1  -6   3 2864.70 231.226   5
  -1  -6   2 1861.12 186.216   5
  -1  -6   2 1816.86 112.295   1
  -1  -6   1 330.599 55.1546   1
  -1  -6   1 373.267 79.0214   4
  -1  -6   1 493.937 102.652   5
  -1  -6   0 2049.25 195.508   5
  -1  -6  -1 2430.38 214.962   5
  -1  -6  -2 787.090 126.713   5
  -1  -6  -3 938.213 136.189   5
  -1  -6  -4 442.841 99.7277   5
  -1  -6  -5 8611.89 398.394   5
  -1  -6  -6 183.243 65.5536   5
   1   6   7 918.537 166.794   2
   1   6   7 829.619 107.603   3
  -1  -6  -7 726.091 120.165   5
   1   6   8 10142.2 542.001   2
  -1  -6  -8 9369.67 413.008   5
  -1  -6  -9-22.8888 35.4416   5
   1   6   9 73.6299 69.9898   2
  -1  -6 -10 1142.16 144.063   5
   1   6  10 1108.32 198.763   2
  -1  -6 -11 159.306 66.7248   5
   1   6  11 77.6014 73.0226   2
   1   6  12-38.5447 67.9117   2
   1   6  13 295.265 127.342   2
   1   7 -14 601.389 117.737   3
  -1  -7  13-32.2126 44.2887   5
   1   7 -13 47.8880 52.6684   4
   1   7 -13-68.1221 52.4696   3
  -1  -7  12 459.093 105.832   5
   1   7 -12 358.289 106.364   4
   1   7 -12 506.025 105.828   3
  -1  -7  11 370.637 99.5166   5
   1   7 -11 253.002 87.6400   4
   1   7 -11 361.188 84.4528   3
   1   7 -10 1520.07 163.066   3
  -1  -7  10 1501.43 188.878   5
  -1  -7   9 3436.47 282.420   5
   1   7  -9 3967.37 255.804   3
  -1  -7   8 2713.20 249.993   5
   1   7  -8 2819.34 209.991   3
   1   7  -7 1977.03 171.486   3
  -1  -7   7 1910.49 209.894   5
  -1  -7   6 750.201 131.350   5
   1   7  -6 766.303 105.469   3
  -1  -7   5 118.760 69.1162   5
   1   7  -5 243.983 67.5301   3
  -1  -7   4 3092.21 262.770   5
  -1  -7   4 3125.44 122.996   1
  -1  -7   3 202.686 82.2083   5
  -1  -7   3 243.923 38.8714   1
  -1  -7   2 3358.78 150.953   1
  -1  -7   2 3053.82 258.947   5
  -1  -7   1 1741.66 122.065   1
  -1  -7   1 1936.42 207.707   5
  -1  -7   0 5681.80 354.873   5
  -1  -7  -1 3294.53 271.030   5
  -1  -7  -2 9837.89 461.188   5
  -1  -7  -3 284.188 92.2509   5
  -1  -7  -4 1546.15 187.891   5
  -1  -7  -5 43.6119 50.3086   5
   1   7   6 984.227 113.865   3
  -1  -7  -6 829.425 138.041   5
  -1  -7  -7 159.708 69.3885   5
   1   7   7 265.482 110.813   2
  -1  -7  -8 185.140 71.4857   5
   1   7   8 263.245 113.714   2
  -1  -7  -9 1082.88 154.394   5
   1   7   9 1186.99 206.713   2
   1   7  10 411.763 131.990   2
  -1  -7 -10 355.795 95.6594   5
   1   7  11 1203.22 228.822   2
  -1  -8  12 54.8352 55.4269   5
   1   8 -12 41.3015 46.5065   3
  -1  -8  11-15.1346 37.0491   5
   1   8 -11 35.7446 40.3937   3
  -1  -8  10-51.3142 53.9964   5
   1   8 -10-2.76038 43.8496   3
   1   8  -9 1222.78 142.833   3
  -1  -8   9 1229.18 186.156   5
  -1  -8   8 22.2649 46.2575   5
   1   8  -8 70.0488 45.3341   3
  -1  -8   7 2572.60 262.784   5
   1   8  -7 2820.67 202.275   3
  -1  -8   6 47.3761 56.3991   5
   1   8  -6 24.5516 32.1608   3
   1   8  -5 5364.60 268.153   3
  -1  -8   5 5242.82 370.326   5
  -1  -8   4 152.062 78.8729   5
   1   8  -4 208.173 64.7148   3
  -1  -8   3 1253.30 75.0133   1
  -1  -8   3 1311.01 188.343   5
  -1  -8   2 35.3763 55.0560   5
  -1  -8   2-5.34572 19.4156   1
  -1  -8   1 3042.73 280.336   5
  -1  -8   1 3098.69 159.007   1
  -1  -8   0 70.8909 54.0967   5
  -1  -8   0-11.6343 27.9760   1
  -1  -8  -1 998.070 167.661   5
  -1  -8  -2 69.8733 62.2601   5
  -1  -8  -3 153.775 77.8939   5
  -1  -8  -4 7019.88 420.965   5
  -1  -8  -5 2415.33 251.314   5
  -1  -8  -6 96.6588 54.2169   5
  -1  -8  -7 246.669 81.5728   5
   1   8   7 127.323 81.2158   2
  -1  -8  -8 221.749 86.8026   5
   1   8   8 196.498 104.843   2
  -1  -8  -9 37.5668 40.0186   5
   1   8   9-144.336 87.2527   2
  -1  -8 -10 604.931 129.259   5
  -1  -9  12 213.107 90.3784   5
  -1  -9  11 160.807 81.8934   5
  -1  -9  10 1228.96 198.590   5
  -1  -9   9 14.1739 60.2782   5
  -1  -9   8 80.3414 55.1828   5
  -1  -9   7 512.732 133.315   5
  -1  -9   6 303.476 107.904   5
  -1  -9   5 278.839 97.3131   5
  -1  -9   4 2435.23 271.021   5
  -1  -9   3-16.7017 53.2316   5
  -1  -9   2 1937.83 243.554   5
  -1  -9   1 51.0578 69.9119   5
  -1  -9   0 85.4802 64.8893   5
  -1  -9  -1 177.283 86.1167   5
  -1  -9  -2-18.2781 55.4736   5
  -1  -9  -3 147.065 83.2713   5
  -1  -9  -4-124.716 70.4031   5
  -1  -9  -5 176.809 72.5778   5
  -1  -9  -6 278.053 104.227   5
  -1  -9  -7 566.980 138.494   5
   1   9   7 542.325 160.721   2
  -1  -9  -8 21.8819 53.6429   5
  -1  -9  -9-189.122 79.4355   5
  -1 -10   7 33.7584 65.3127   5
  -1 -10   6 242.956 99.0742   5
  -1 -10   5 446.257 127.695   5
  -1 -10   4 30.5476 57.4212   5
  -1 -10   3 807.001 178.209   5
  -1 -10   2 51.4317 81.2493   5
  -1 -10   1 112.166 79.5254   5
  -1 -10   0 355.343 114.909   5
  -1 -10  -1 37.1533 57.5957   5
  -1 -10  -2 495.969 149.889   5
  -1 -10  -3 10.0694 66.9056   5
  -1 -10  -4 219.838 94.6747   5
  -1 -10  -5-52.5365 56.8601   5
   2 -11  -8-11.2652 45.2019   5
   2 -11  -7 149.511 85.8160   5
   2 -11  -6 495.305 138.091   5
   2 -11  -5 31.6770 80.8079   5
   2 -11  -4 615.747 148.012   5
   2 -11  -3 961.380 174.842   5
   2 -11  -2 597.114 149.177   5
   2 -11  -1 1264.39 210.691   5
   2 -11   0 1441.02 220.445   5
   2 -11   1 109.389 73.7722   5
   2 -11   2 144.048 77.2666   5
   2 -11   3 121.762 71.4362   5
   2 -11   4 124.827 97.4196   5
   2 -11   5 556.639 138.616   5
   2 -11   6 326.991 118.992   5
   2 -11   7 135.124 83.1530   5
   2 -11   8 36.6042 52.6604   5
   2 -10  -9 279.913 99.6988   5
   2 -10  -8 1680.07 223.611   5
   2 -10  -7 628.167 143.199   5
   2 -10  -6 416.025 117.953   5
   2 -10  -5 684.615 142.919   5
   2 -10  -4 1016.50 172.158   5
   2 -10  -3 4.56108 59.9255   5
   2 -10  -2 2954.98 289.070   5
   2 -10  -1 48.9672 62.5144   5
   2 -10   0 1675.60 221.639   5
   2 -10   1-2.89704 48.8764   5
   2 -10   2 45.7361 50.3091   5
   2 -10   3 750.804 154.257   5
   2 -10   4 161.090 74.9001   5
   2 -10   5 11.8699 51.3578   5
   2 -10   6 221.867 98.6600   5
   2 -10   7-17.6651 46.4815   5
   2 -10   8 539.676 128.854   5
   2 -10   9 113.334 68.1190   5
   2 -10  10 198.900 90.0322   5
   2 -10  11 191.085 86.3480   5
   2 -10  12-194.174 78.3836   5
   2  -9 -10-18.8453 44.6980   5
   2  -9  -9 8.91442 38.6883   5
   2  -9  -8 77.9523 58.1543   5
   2  -9  -7 1202.40 172.879   5
   2  -9  -6 1754.94 209.396   5
   2  -9  -5 1847.02 215.638   5
   2  -9  -4 1322.73 180.055   5
   2  -9  -3 11.5814 62.0662   5
   2  -9  -2 36.7629 41.0369   5
   2  -9  -2 3.48850 13.8595   1
   2  -9  -1 805.177 142.097   5
   2  -9   0 446.106 111.720   5
   2  -9   1 4613.17 338.206   5
   2  -9   2 62.7969 63.0849   5
   2  -9   3 2232.32 236.832   5
   2  -9   4 460.344 121.730   5
   2  -9   5 154.972 76.6674   5
   2  -9   6 276.533 88.8303   5
   2  -9   7 61.8545 45.8888   5
   2  -9   8 29.0893 45.5481   5
   2  -9   9 824.724 147.084   5
   2  -9  10 416.853 104.031   5
   2  -9  11-37.8755 41.6023   5
  -2   9 -11-87.3521 69.0383   4
  -2   9 -12 1139.76 186.473   4
   2  -9  12 949.315 158.368   5
  -2   8  12 642.003 165.314   2
   2  -8 -11-25.4052 35.3588   5
  -2   8  11-54.2431 64.5118   2
   2  -8 -10 464.387 102.072   5
  -2   8  10 495.962 130.012   2
   2  -8  -9-8.37952 42.2864   5
   2  -8  -8 389.808 92.1859   5
   2  -8  -7 389.095 93.2059   5
   2  -8  -6 5671.63 341.872   5
   2  -8  -6 4604.63 238.213   1
   2  -8  -5 151.225 74.8784   5
   2  -8  -5 77.8770 36.1093   1
   2  -8  -4 13176.4 519.028   5
   2  -8  -4 11816.1 329.620   1
   2  -8  -3-153.078 71.7852   5
   2  -8  -3 13.8569 18.1306   1
   2  -8  -2 741.739 67.2329   1
   2  -8  -2 899.614 140.039   5
   2  -8  -1 2941.11 206.364   4
   2  -8  -1 2791.35 101.485   1
   2  -8  -1 2869.32 244.807   5
   2  -8   0 129.537 76.0676   5
   2  -8   0 115.906 44.3053   4
   2  -8   1 463.474 109.366   5
   2  -8   1 429.940 79.6590   4
   2  -8   2 11316.9 485.775   5
   2  -8   2 11551.5 393.186   4
   2  -8   3 42.3315 57.8025   5
   2  -8   4 1451.06 179.522   5
   2  -8   5 11883.9 500.788   5
   2  -8   6 4387.77 306.434   5
   2  -8   7 86.5509 61.3549   5
   2  -8   8-2.84901 49.0356   5
  -2   8  -8-21.5392 46.6930   4
  -2   8  -9 625.707 122.943   4
   2  -8   9 710.567 126.772   5
   2  -8  10 957.800 147.318   5
  -2   8 -10 1004.14 154.580   4
   2  -8  11-11.6445 44.6895   5
  -2   8 -11 18.4000 41.6678   4
  -2   8 -12 4.96066 45.2436   4
   2  -8  12-118.773 59.8901   5
  -2   8 -13 374.468 112.941   4
   2  -8  13 233.579 84.9535   5
  -2   7  14-81.7827 106.989   2
  -2   7  13 3.28428 53.0037   2
  -2   7  12-70.7829 66.4243   2
   2  -7 -11 104.534 47.2495   5
  -2   7  11 151.618 81.6081   2
  -2   7  10 817.104 163.949   2
   2  -7 -10 815.322 118.951   5
   2  -7  -9 1568.32 163.191   5
   2  -7  -8 1596.03 169.155   5
   2  -7  -7 23.8396 37.4078   5
   2  -7  -7-49.8909 32.0304   1
   2  -7  -6 1218.63 149.440   5
   2  -7  -6 1007.00 109.015   1
   2  -7  -5 1077.65 104.728   1
   2  -7  -5 1289.29 153.165   5
   2  -7  -4 677.376 77.4082   1
  -2   7   4 660.891 126.177   5
   2  -7  -4 832.785 122.748   5
  -2   7   3 3893.17 297.511   5
   2  -7  -3 3707.07 255.045   5
   2  -7  -3 3592.50 162.141   1
  -2   7   2 2442.56 234.172   5
   2  -7  -2 2833.78 222.887   5
   2  -7  -2 2303.05 116.742   1
  -2   7   1 16848.5 604.121   5
   2  -7  -1 17033.4 452.633   4
   2  -7  -1 17140.1 261.262   1
   2  -7  -1 17892.7 553.862   5
   2  -7   0 98.9337 39.2605   4
   2  -7   0 17.2435 49.3631   5
  -2   7   0 61.1442 38.0634   5
  -2   7  -1 1829.26 203.712   5
   2  -7   1 1801.06 143.459   4
   2  -7   1 1799.18 179.213   5
   2  -7   2 2753.04 218.918   5
   2  -7   2 2681.23 173.136   4
   2  -7   3 4222.52 274.674   5
   2  -7   4 95.3436 51.3929   5
   2  -7   5 2943.64 229.787   5
  -2   7  -6 6945.65 341.057   4
   2  -7   6 7349.04 362.596   5
  -2   7  -7 755.773 49.2499   1
  -2   7  -7 889.463 133.463   4
   2  -7   7 857.494 134.588   5
   2  -7   8 8798.05 398.917   5
  -2   7  -8 8644.15 394.598   4
  -2   7  -8 8225.06 211.428   1
   2  -7   9 772.121 122.727   5
  -2   7  -9 761.944 123.935   4
  -2   7  -9 824.028 77.3880   1
   2  -7  10 174.583 63.1050   5
  -2   7 -10 137.603 61.0864   4
   2  -7  11-40.4641 41.7998   5
  -2   7 -11-87.4713 55.9321   4
  -2   7 -12 82.6870 50.1066   4
   2  -7  12-66.1434 43.4961   5
   2  -7  13 427.691 94.0273   5
  -2   7 -13 314.792 96.2049   4
  -2   7 -14 42.3576 46.3092   4
  -2   6  16 1762.11 275.832   2
  -2   6  15 1046.55 197.918   2
  -2   6  14 195.619 98.2602   2
  -2   6  13-103.965 73.3405   2
  -2   6  12 462.907 125.091   2
   2  -6 -11 1390.34 136.921   5
  -2   6  11 1827.88 230.637   2
   2  -6 -10 242.746 57.9655   5
  -2   6  10 388.391 107.140   2
   2  -6  -9 1315.76 135.968   5
   2  -6  -8 3139.58 209.662   5
   2  -6  -7 2752.83 179.210   1
   2  -6  -7 2756.62 197.235   5
  -2   6   6 6500.84 368.752   5
   2  -6  -6 7018.89 313.721   5
   2  -6  -6 6711.21 263.989   1
   2  -6  -5 49.1215 42.7307   5
  -2   6   5 10.2546 42.7055   5
   2  -6  -5 74.6539 31.4104   1
   2  -6  -4 158.607 41.9495   1
   2  -6  -4 186.290 57.0464   5
  -2   6   4 185.296 72.0829   5
   2  -6  -3 45.1086 31.6460   5
   2  -6  -3 86.0925 27.3469   1
  -2   6   3 109.688 55.4796   5
  -2   6   2 2035.31 196.047   5
   2  -6  -2 2073.40 175.030   5
   2  -6  -2 1899.67 102.634   1
  -2   6   1 1.59543 29.5697   5
   2  -6  -1 32.6074 13.7636   1
  -2   6   0 3671.96 259.589   5
   2  -6   0 3404.78 87.0756   1
   2  -6   0 3267.69 175.403   4
  -2   6  -1 4913.57 300.773   5
   2  -6   1 5029.05 212.299   4
   2  -6   2 1775.73 127.197   4
  -2   6  -2 2027.83 197.359   5
  -2   6  -3 91.0361 46.9804   2
  -2   6  -3 142.789 71.6839   5
   2  -6   3 80.7404 40.8557   5
  -2   6  -4 1751.00 175.334   2
   2  -6   4 2265.99 184.078   5
  -2   6  -4 1962.54 156.774   4
  -2   6  -4 1963.37 197.962   5
  -2   6  -5 346.931 70.7161   4
  -2   6  -5 392.507 88.5540   2
  -2   6  -5 343.849 88.0906   5
   2  -6   5 451.205 89.5942   5
  -2   6  -6 187.733 69.4498   5
  -2   6  -6 81.5989 44.1458   4
   2  -6   6 166.149 62.9489   5
  -2   6  -6 112.449 22.4307   1
  -2   6  -6 100.831 53.8267   2
  -2   6  -7 71.4188 21.5540   1
  -2   6  -7 71.9173 47.6445   2
  -2   6  -7 38.1831 36.6368   4
  -2   6  -7-38.0921 63.3740   5
   2  -6   7 120.240 53.4866   5
   2  -6   8 5.47000 52.8212   5
  -2   6  -8 103.365 50.0767   4
  -2   6  -8 40.2716 20.7559   1
   2  -6   9 2859.45 210.285   5
  -2   6  -9 2869.65 216.276   4
  -2   6  -9 2913.52 167.560   1
  -2   6 -10-2.03947 32.5798   1
  -2   6 -10 39.3798 48.6333   4
   2  -6  10 22.2459 35.8520   5
   2  -6  11 344.399 73.8701   5
  -2   6 -11 522.596 87.4996   1
  -2   6 -11 411.981 95.3913   4
   2  -6  12-20.4558 28.8789   5
  -2   6 -12 80.4322 57.8916   4
  -2   6 -13 1261.30 171.039   4
   2  -6  13 1237.95 135.990   5
  -2   6 -14 55.9007 44.9774   4
  -2   6 -15-37.3629 65.3756   4
  -2   5  17 223.253 109.874   2
  -2   5  16 42.9794 61.7673   2
  -2   5  15 164.901 77.2406   2
  -2   5  14 1279.59 204.642   2
  -2   5  13 5064.46 390.433   2
  -2   5  12 265.692 99.9569   2
   2  -5 -12 273.647 54.4073   5
  -2   5  11 10.7919 41.8078   2
   2  -5 -11-38.5658 34.2600   5
  -2   5  10 213.889 85.5384   2
   2  -5 -10 92.1849 34.3446   5
   2  -5  -9 137.094 41.1658   5
  -2   5   9 71.9063 56.3079   2
   2  -5  -8 130.612 45.9507   5
   2  -5  -8 33.7885 24.8077   1
   2  -5  -7 2503.64 168.458   5
   2  -5  -7 2352.05 161.261   1
   2  -5  -6 1163.97 118.370   5
   2  -5  -6 967.194 100.113   1
   2  -5  -5 251.995 59.3890   5
   2  -5  -5 194.087 41.3286   1
   2  -5  -4 486.057 80.1166   5
   2  -5  -4 406.831 57.2198   1
  -2   5   4 514.255 95.9431   5
   2  -5  -3 160.252 50.2951   5
   2  -5  -3 266.301 44.0057   1
  -2   5   3 213.536 67.3534   5
   2  -5  -2 2131.93 161.837   5
   2  -5  -2 1869.36 99.2903   1
  -2   5   2 1977.82 177.567   5
   2  -5  -1 16.5402 12.5583   1
  -2   5   1-7.61121 29.9489   5
  -2   5   0 60.8629 34.5577   5
   2  -5   0 58.6377 24.4125   4
   2  -5   0 103.475 19.0957   1
  -2   5  -1 36.8220 38.8462   5
   2  -5   1 23.9887 19.2251   4
  -2   5  -2 535.173 97.3503   5
   2  -5   2 675.643 71.2641   4
  -2   5  -3 8765.86 376.008   5
  -2   5  -3 9116.94 352.904   2
  -2   5  -4 617.262 35.0879   1
  -2   5  -4 596.000 106.041   5
  -2   5  -4 643.850 99.3652   2
  -2   5  -5 1577.51 165.385   5
  -2   5  -5 1643.97 79.9664   1
  -2   5  -5 1496.39 159.505   2
  -2   5  -6 3455.85 253.616   2
   2  -5   6 3278.71 193.352   3
  -2   5  -6 3401.34 194.478   4
  -2   5  -7 4331.43 227.994   4
   2  -5   7 3916.19 231.012   3
  -2   5  -7 4162.36 291.641   2
   2  -5   8 1847.35 174.327   3
  -2   5  -8 1927.84 208.840   2
  -2   5  -8 1945.16 158.991   4
   2  -5   9 79.9643 61.0790   2
   2  -5   9 38.6554 39.6928   3
  -2   5  -9 43.9704 29.4752   1
   2  -5  10 3541.69 275.600   3
   2  -5  10 3641.90 278.358   2
  -2   5 -10 4000.24 236.310   1
  -2   5 -11 199.993 63.5342   1
   2  -5  11 236.442 87.0153   2
   2  -5  12 1547.26 197.895   2
   2  -5  13 1166.37 180.854   2
   2  -5  14 281.990 99.8883   2
   2  -5  15 252.369 96.9070   2
   2  -5  16 365.391 116.541   2
   2  -5  17 665.184 159.858   2
  -2   4  17 329.816 128.113   2
  -2   4  16 1010.53 196.468   2
  -2   4  15 107.485 68.8135   2
  -2   4  14 110.203 80.5444   2
  -2   4  13 1002.81 169.887   2
  -2   4  12 310.257 93.5213   2
   2  -4 -12 286.398 42.7896   5
  -2   4  11-73.1451 73.5499   2
   2  -4 -11 25.1317 20.2048   5
  -2   4  10 4052.32 284.257   2
   2  -4 -10 4252.18 181.536   5
   2  -4  -9 2087.95 131.903   5
  -2   4   9 2350.16 207.637   2
   2  -4  -8 1468.64 112.682   5
  -2   4   8 1489.95 159.125   2
   2  -4  -8 1241.87 121.647   1
   2  -4  -7 4887.36 208.531   5
   2  -4  -7 4663.16 221.733   1
   2  -4  -6 3769.09 191.109   1
   2  -4  -6 4102.41 192.087   5
   2  -4  -5 19.9849 35.9083   3
   2  -4  -5 23.0750 23.8245   1
   2  -4  -4 688.521 87.0566   5
   2  -4  -4 745.825 64.3420   3
   2  -4  -4 741.176 75.8182   1
   2  -4  -3 9468.07 190.593   3
   2  -4  -3 9722.19 305.572   5
  -2   4   3 9640.67 364.629   5
   2  -4  -3 9270.22 238.506   1
   2  -4  -2 146.300 48.8584   5
   2  -4  -2 118.881 26.2603   1
  -2   4   2 168.505 58.5014   5
   2  -4  -2 185.591 23.8645   3
   2  -4  -1 1165.12 67.1829   1
  -2   4   1 1319.61 133.289   5
   2  -4   0 3068.08 94.7858   1
   2  -4   0 3157.92 125.704   4
  -2   4   0 3178.98 207.488   5
   2  -4   1 919.288 68.4942   4
  -2   4  -1 872.993 33.3622   1
  -2   4  -1 906.324 118.807   5
  -2   4  -2 5508.81 241.611   2
  -2   4  -2 5758.86 98.8605   1
  -2   4  -2 5822.76 187.576   4
   2  -4   2 5916.33 128.986   3
  -2   4  -2 5894.62 283.584   5
  -2   4  -3 3264.22 147.608   4
   2  -4   3 3226.37 181.357   5
  -2   4  -3 3108.71 192.934   2
   2  -4   3 3300.70 121.196   3
  -2   4  -3 2940.17 203.407   5
  -2   4  -4 38.7771 31.2977   2
  -2   4  -4 41.9951 30.2999   4
   2  -4   4 16.2604 17.6872   3
   2  -4   4 33.8661 39.6218   5
  -2   4  -5 1228.17 135.648   2
   2  -4   5 1338.85 102.285   3
   2  -4   5 1261.00 114.840   5
  -2   4  -6 3031.68 226.194   2
   2  -4   6 2679.84 162.612   3
   2  -4   6 2902.91 169.226   5
   2  -4   7 5952.77 241.680   5
  -2   4  -7 5502.29 320.179   2
   2  -4   7 5470.32 291.740   2
   2  -4   7 6107.87 267.001   3
  -2   4  -8 2500.43 227.967   2
   2  -4   8 2370.37 184.077   3
   2  -4   8 2468.89 206.343   2
   2  -4   8 2533.98 157.269   5
  -2   4  -9 212.179 70.1069   2
   2  -4   9 253.628 53.9475   5
   2  -4   9 200.725 72.0287   2
   2  -4   9 102.423 43.0529   3
   2  -4  10 3571.09 272.335   2
   2  -4  10 3912.43 190.345   5
   2  -4  10 3898.90 274.480   3
   2  -4  11 68.3360 30.5317   5
   2  -4  11-11.1143 52.2787   2
   2  -4  12 147.419 75.0276   2
   2  -4  12 206.861 45.6653   5
   2  -4  13 2044.47 239.929   2
   2  -4  13 1981.88 118.940   5
   2  -4  14 112.747 66.6431   2
   2  -4  15 41.0380 53.8310   2
   2  -4  16 308.091 107.014   2
   2  -4  17 172.906 88.2687   2
   2  -4  18 74.9787 71.5999   2
  -2   3  18-38.3823 78.0379   2
  -2   3  17 162.821 97.1751   2
  -2   3  16 565.330 139.987   2
  -2   3  15 305.989 109.847   2
  -2   3  14 379.971 114.539   2
  -2   3  13 91.4850 69.3613   2
  -2   3  12-13.3003 38.9568   2
   2  -3 -11 2780.74 100.439   5
  -2   3  11 2775.51 234.734   2
   2  -3 -10 172.105 31.4988   5
   2  -3 -10 100.407 44.5845   3
  -2   3  10 120.670 58.5298   2
   2  -3  -9 748.072 101.067   3
   2  -3  -9 595.123 88.2911   1
  -2   3   9 723.251 109.324   2
   2  -3  -9 640.137 62.0754   5
   2  -3  -8 139.909 39.3451   1
   2  -3  -8 170.729 35.5725   5
   2  -3  -8 125.599 45.6605   3
   2  -3  -7 6555.78 209.029   5
   2  -3  -7 6596.90 259.177   1
   2  -3  -6 8919.77 287.362   1
   2  -3  -6 9481.57 283.877   3
   2  -3  -5 55868.9 669.599   1
   2  -3  -5 55673.6 637.357   3
   2  -3  -5 56189.1 651.358   5
   2  -3  -4 97192.2 768.992   3
   2  -3  -4 95776.8 818.165   1
   2  -3  -3 14306.7 347.294   5
   2  -3  -3 13783.6 265.864   3
   2  -3  -3 13978.2 287.697   1
   2  -3  -2 14372.3 357.142   5
   2  -3  -2 13763.0 242.346   3
   2  -3  -2 13864.2 258.419   1
   2  -3  -1 3450.09 118.454   1
   2  -3  -1 3910.62 193.793   5
  -2   3   1 3561.48 108.267   1
   2  -3   0 1874.67 80.7294   1
   2  -3   0 1965.85 74.3450   4
  -2   3   0 1965.21 73.6878   1
  -2   3  -1 1941.21 124.078   2
  -2   3  -1 1851.75 81.2855   4
  -2   3  -1 1996.71 75.7529   1
  -2   3  -2 64716.0 759.633   2
  -2   3  -2 65185.9 525.824   4
   2  -3   2 65764.8 782.525   5
   2  -3   3 25596.7 484.768   5
   2  -3   3 24259.9 320.281   3
  -2   3  -3 24689.5 509.499   2
   2  -3   4 26204.5 484.872   5
   2  -3   4 25722.3 382.918   3
  -2   3  -4 26256.3 562.919   2
  -2   3  -5 68465.2 970.685   2
   2  -3   5 71077.0 712.491   3
   2  -3   5 69505.1 773.714   5
  -2   3  -6 14599.6 474.484   2
   2  -3   6 14888.8 350.458   5
   2  -3   6 15277.9 369.390   3
  -2   3  -7 958.630 130.632   2
   2  -3   7 1092.56 110.092   3
   2  -3   7 969.563 89.0334   5
   2  -3   8 7291.17 352.775   2
  -2   3  -8 7545.12 375.749   2
   2  -3   8 7895.20 320.911   3
   2  -3   8 7280.45 234.527   5
   2  -3   9 78.8740 26.6350   5
  -2   3  -9 119.358 57.5733   2
   2  -3   9 72.9738 56.7835   2
   2  -3   9 81.6064 45.9812   3
  -2   3 -10 2117.97 218.735   2
   2  -3  10 1609.28 187.974   2
   2  -3  10 1827.99 111.735   5
   2  -3  11 1957.49 107.988   5
   2  -3  11 1855.17 212.002   2
   2  -3  12 2812.05 270.714   2
   2  -3  12 3187.11 120.165   5
   2  -3  13 2165.17 245.217   2
   2  -3  14-94.1414 85.5042   2
   2  -3  15-103.154 71.1943   2
   2  -3  16-12.7700 60.6368   2
   2  -3  17 403.974 130.606   2
   2  -3  18 138.430 94.2004   2
  -2   2  17 37.3574 59.7847   2
  -2   2  16-184.098 82.5669   2
  -2   2  15 477.875 122.378   2
  -2   2  14 180.845 79.9508   2
  -2   2  13 104.911 65.2643   2
  -2   2  12-66.4227 55.6283   2
   2  -2 -12-32.2007 51.7816   3
   2  -2 -11 7409.45 339.525   3
  -2   2  11 7258.95 361.640   2
   2  -2 -10 4.52493 8.17877   5
   2  -2 -10-71.7007 52.8859   3
   2  -2  -9 319.475 34.5082   5
   2  -2  -9 215.330 54.0287   1
   2  -2  -9 312.907 71.3959   3
  -2   2   8 10835.4 357.544   2
   2  -2  -8 10538.4 347.540   1
   2  -2  -8 10212.9 213.560   5
   2  -2  -8 10453.4 348.092   3
   2  -2  -7 5439.47 176.704   5
  -2   2   7 5548.27 233.368   2
   2  -2  -7 5607.61 239.912   1
   2  -2  -6 5501.65 231.025   3
  -2   2   6 5321.36 210.210   2
   2  -2  -6 5476.65 224.145   1
   2  -2  -6 5128.34 188.903   5
   2  -2  -5 8275.70 248.870   5
   2  -2  -5 8784.53 274.972   3
   2  -2  -5 8475.17 261.552   1
   2  -2  -4 5253.85 199.002   3
   2  -2  -4 5408.16 193.444   1
  -2   2   3 3.62912 23.7904   1
   2  -2  -3-9.82852 21.9338   1
  -2   2   2 975683. 2083.31   1
   2  -2  -2 999999. 2201.00   1
   2  -2  -1 46899.1 453.401   1
  -2   2   1 46783.7 428.307   1
  -2   2   0 16612.5 250.368   1
  -2   2   0 16500.6 293.790   2
  -2   2  -1 54185.5 593.618   2
  -2   2  -2 1691.31 117.837   2
  -2   2  -3 1364.90 115.025   2
  -2   2  -4 11264.1 357.008   2
  -2   2  -5 2850.48 193.484   2
   2  -2   5 2992.44 147.335   3
  -2   2  -6-7.06247 30.4602   2
   2  -2   6-17.9170 35.3902   5
   2  -2   6-3.04180 25.3021   3
  -2   2  -7 22256.0 595.128   2
   2  -2   7 21252.2 393.125   5
   2  -2   8 12384.8 391.487   3
   2  -2   8 11046.9 262.426   5
   2  -2   8 11557.0 451.602   2
  -2   2  -8 11898.6 456.626   2
  -2   2  -9 1633.34 178.663   2
   2  -2   9 1568.34 90.6494   5
   2  -2   9 1573.61 178.784   2
   2  -2   9 1645.45 154.734   3
   2  -2  10 6615.76 166.556   5
  -2   2 -10 6775.05 379.749   2
   2  -2  10 6622.34 377.221   2
   2  -2  11 3059.38 274.892   2
   2  -2  11 3130.95 89.9705   5
   2  -2  12 160.323 76.4857   2
   2  -2  13-48.8764 71.2194   2
   2  -2  14 777.617 164.396   2
   2  -2  15-45.9308 59.6416   2
   2  -2  16 300.566 125.871   2
   2  -2  17 81.0950 65.0962   2
   2  -2  18-52.9856 88.2025   2
  -2   1  17-19.0062 44.9426   2
  -2   1  16 805.943 154.893   2
  -2   1  15 330.161 99.6847   2
  -2   1  14 699.539 135.755   2
  -2   1  13 2209.56 220.581   2
   2  -1 -13 1982.29 195.948   3
  -2   1  12 790.874 130.203   2
   2  -1 -12 851.002 124.397   3
   2  -1 -11 52.1993 47.3323   3
   2  -1 -10 418.576 81.5425   3
   2  -1  -9 4982.42 113.166   5
   2  -1  -9 4853.13 255.875   3
  -2   1   9 5166.83 254.964   2
   2  -1  -9 5062.74 256.387   1
   2  -1  -9 5295.67 121.456   5
  -2   1   8 28695.4 543.580   2
   2  -1  -8 27934.3 313.364   5
   2  -1  -8 28483.2 573.853   1
   2  -1  -7 5088.78 229.273   1
  -2   1   7 4774.77 202.316   2
  -2   1   6 3773.89 159.987   2
   2  -1  -6 4018.77 191.506   1
  -2   1   5 7601.69 194.740   2
   2  -1  -5 7253.60 241.248   1
   2  -1  -4 1582.39 104.523   1
  -2   1   4 1626.02 77.2784   2
   2  -1  -3 275.231 46.5418   1
   2  -1  -2 45576.6 497.370   1
  -2   1   1 5661.02 129.584   2
   2  -1  -1 5725.54 170.050   1
   2  -1   0 30545.5 347.459   2
  -2   1   0 29589.0 358.284   2
  -2   1  -1 292287. 1305.97   2
   2  -1   1 292998. 1284.28   2
  -2   1  -2 8658.61 252.368   2
  -2   1  -3 782.972 84.6252   2
  -2   1  -4 3611.83 195.966   2
  -2   1  -5 11279.0 364.546   2
  -2   1  -6 336.854 69.8947   2
   2  -1   7 3797.41 198.314   3
  -2   1  -7 3677.35 235.385   2
   2  -1   8 3.68677 54.7122   2
   2  -1   8-18.2303 26.4861   3
  -2   1  -8-11.1146 32.0413   2
   2  -1   9 197.203 29.4721   5
  -2   1  -9 209.932 62.9508   2
   2  -1   9 208.067 34.1748   5
   2  -1   9 224.339 72.5326   2
   2  -1   9 228.492 60.3390   3
   2  -1  10 3208.66 271.634   2
  -2   1 -10 3474.74 270.538   2
   2  -1  10 3258.00 93.9880   5
   2  -1  10 3162.14 88.7185   5
   2  -1  11 5299.49 362.901   2
   2  -1  12 3368.77 306.420   2
   2  -1  13 803.949 161.597   2
   2  -1  14 670.228 158.558   2
   2  -1  15 569.570 151.750   2
   2  -1  16 23.4071 68.6428   2
   2  -1  17 418.690 142.910   2
  -2   0  17 273.980 104.249   2
  -2   0  16 1062.32 169.447   2
  -2   0  15 59.2682 62.4554   2
   2   0 -15-34.7671 57.1364   3
   2   0 -14 236.138 83.5609   3
  -2   0  14 342.848 93.9441   2
  -2   0  13 434.544 101.562   2
   2   0 -13 340.367 85.0987   3
  -2   0  12 1646.26 172.592   2
   2   0 -12 1706.35 179.050   3
   2   0 -11 943.552 129.595   3
  -2   0  10 427.641 84.3232   2
   2   0 -10 436.688 84.9223   1
   2   0 -10 503.765 94.7931   3
   2   0 -10 405.206 29.9686   5
   2   0  -9 17.6036 16.4027   2
  -2   0   9 31.7534 33.5838   2
   2   0  -9 4.16712 10.7406   5
   2   0  -9 13.7080 32.5747   1
   2   0  -8 616.740 85.6403   1
   2   0  -8 689.156 56.4667   5
  -2   0   8 624.916 80.5335   2
   2   0  -8 766.932 78.3836   2
   2   0  -7 30.9617 16.2568   2
   2   0  -7 19.5461 15.3636   5
   2   0  -7 8.73131 31.8156   1
  -2   0   7 44.1954 28.7520   2
  -2   0   6 969.238 77.4748   2
   2   0  -6 896.536 92.3781   1
   2   0  -6 950.954 67.8382   2
   2   0  -6 1008.90 72.7004   5
  -2   0   5 2105.40 91.6022   2
   2   0  -5 2095.52 103.964   5
   2   0  -5 1956.65 127.247   1
   2   0  -5 2039.28 82.2007   2
   2   0  -4 24774.1 416.463   1
  -2   0   4 24637.9 229.137   2
   2   0  -4 24646.7 352.304   5
  -2   0   4 24977.8 401.902   1
   2   0  -3 3.67593 13.3088   4
   2   0  -3 0.84538 18.6962   1
   2   0  -2 366.806 37.3310   4
  -2   0   2 346.892 34.7294   4
   2   0  -2 315.501 47.1820   1
  -2   0   1 5847.00 110.009   2
   2   0  -1 5871.79 118.987   2
  -2   0   0 1323.82 71.5699   2
   2   0   0 1302.35 73.4973   2
   2   0   1 8328.21 216.534   2
  -2   0  -1 7990.25 206.955   2
   2   0   2 10948.4 280.621   2
  -2   0  -2 10928.0 274.357   2
  -2   0  -3 10414.9 297.166   2
  -2   0  -4 2207.25 150.478   2
   2   0   5 17070.3 311.098   5
  -2   0  -5 16318.8 438.546   2
   2   0   6 3920.14 149.107   5
  -2   0  -6 4274.51 240.137   2
   2   0   7 962.021 73.8269   5
  -2   0  -7 988.508 123.350   2
  -2   0  -8 715.632 112.377   2
   2   0   8 735.758 99.5538   3
   2   0   8 727.473 122.501   2
   2   0   8 732.084 62.4172   5
   2   0   9 101.416 24.7724   5
  -2   0  -9 166.390 59.0238   2
   2   0   9 128.992 77.2641   2
   2   0   9 89.2139 41.2274   3
   2   0  10 5.41084 10.8762   5
   2   0  10-32.3453 56.4678   2
   2   0  11 2993.79 280.241   2
   2   0  12 227.993 101.713   2
   2   0  13 2403.43 277.814   2
   2   0  14 256.664 112.223   2
   2   0  15-39.2516 95.9341   2
   2   0  16 1297.71 231.173   2
   2   0  17-114.204 93.4110   2
  -2  -1  16 159.657 71.2992   2
   2   1 -15 1145.92 162.939   3
  -2  -1  15 789.945 134.459   2
  -2  -1  14 979.661 144.151   2
   2   1 -14 1128.83 162.114   3
   2   1 -13 406.892 84.4379   2
  -2  -1  13 476.751 92.1308   2
   2   1 -13 447.175 104.895   3
   2   1 -12 43.8802 49.2958   3
   2   1 -12 57.8196 30.7087   2
   2   1 -11 1053.99 116.299   2
   2   1 -11 1205.47 147.372   3
   2   1 -11 1163.04 69.0751   5
   2   1 -10 1268.31 80.4028   5
  -2  -1  10 1061.65 113.861   2
   2   1 -10 1318.22 121.641   2
   2   1 -10 1355.85 151.215   3
   2   1 -10 1235.41 138.208   1
   2   1  -9 688.817 64.3501   5
   2   1  -9 844.437 109.338   1
   2   1  -9 717.181 108.765   3
   2   1  -9 835.502 90.9279   2
  -2  -1   9 669.347 83.1800   2
   2   1  -8 11.1179 26.6002   1
  -2  -1   8 34.0405 27.2563   2
   2   1  -8 20.6380 20.1232   2
   2   1  -8 42.8142 17.8413   5
   2   1  -7 31.4602 18.8323   5
   2   1  -7 50.6062 26.2207   2
  -2  -1   7 57.8238 27.5361   2
   2   1  -7 67.4622 30.9993   1
   2   1  -6 2090.59 129.224   4
   2   1  -6 2077.36 108.795   2
   2   1  -6 2185.16 122.931   5
  -2  -1   6 2122.67 100.960   2
   2   1  -6 2164.52 140.901   1
  -2  -1   6 2073.44 132.228   1
   2   1  -5 9866.87 214.980   2
  -2  -1   5 10443.6 277.022   1
   2   1  -5 10240.9 293.250   1
   2   1  -5 10383.6 269.851   4
   2   1  -5 10446.1 269.200   5
   2   1  -4 2392.77 124.300   4
   2   1  -4 2277.57 87.7695   2
   2   1  -4 2308.98 134.267   1
   2   1  -4 2392.26 129.621   5
  -2  -1   4 2285.11 124.848   1
   2   1  -3 175.563 41.1189   5
  -2  -1   3 162.528 37.0063   1
  -2  -1   3 207.189 35.5334   4
   2   1  -3 132.218 31.2531   4
   2   1  -3 160.307 36.3677   1
  -2  -1   2 1301.75 97.2581   5
  -2  -1   2 1458.77 98.6121   1
  -2  -1   2 1337.63 85.8760   4
   2   1  -2 1239.13 94.8875   5
   2   1  -1 57679.5 635.025   5
   2   1   0 571.760 55.7984   2
   2   1   0 513.930 62.8251   5
   2   1   1 492.575 60.7327   5
   2   1   1 484.767 58.9542   2
  -2  -1  -1 431.411 58.5366   5
   2   1   2 8564.78 260.859   2
   2   1   2 8190.27 242.391   5
   2   1   3 435.491 58.7560   5
   2   1   4 14161.6 321.311   5
  -2  -1  -5 22948.6 527.007   2
   2   1   5 23355.9 412.525   5
  -2  -1  -6 19841.7 521.050   2
   2   1   6 19345.8 373.485   5
  -2  -1  -7 273.824 69.3991   2
   2   1   7 445.944 56.4087   5
   2   1   8 3229.95 203.324   3
  -2  -1  -8 3251.20 236.927   2
   2   1   8 3131.87 142.776   5
   2   1   8 3189.62 247.025   2
   2   1   9 8828.94 230.585   5
   2   1   9 8609.50 423.719   2
   2   1  10 5569.67 364.450   2
   2   1  10 5754.56 173.715   5
   2   1  11 16.5944 11.8938   5
   2   1  11 31.9574 47.3068   2
   2   1  12 3085.50 303.445   2
   2   1  13 326.069 117.329   2
   2   1  14 1146.25 207.122   2
   2   1  15 153.457 97.1293   2
   2   1  16 652.618 169.939   2
   2   1  17 13.2076 76.0308   2
   2   2 -16-9.39941 49.8855   3
  -2  -2  15 74.1275 45.1384   2
   2   2 -15 150.164 71.6203   3
  -2  -2  14 727.592 113.331   2
   2   2 -14 919.986 149.281   3
   2   2 -13 3632.49 241.747   2
  -2  -2  13 3647.76 235.016   2
   2   2 -13 3961.71 283.609   3
   2   2 -12 5419.80 283.528   2
   2   2 -12 4975.39 183.045   5
   2   2 -11-19.2679 40.6820   2
   2   2 -11 24.3468 19.1647   5
   2   2 -11-55.2122 53.9493   3
   2   2 -10 3116.43 211.102   4
   2   2 -10 2919.27 215.641   1
   2   2 -10 2932.72 225.404   3
   2   2 -10 2759.18 148.331   5
   2   2 -10 2830.64 186.952   2
  -2  -2  10 3168.37 185.581   2
  -2  -2   9 1947.94 136.500   2
   2   2  -9 1859.09 152.247   4
   2   2  -9 1864.37 160.519   1
   2   2  -9 1935.23 177.189   3
   2   2  -9 1824.79 123.066   5
   2   2  -9 1774.39 141.407   2
   2   2  -8 6831.63 258.124   2
   2   2  -8 6680.51 276.882   4
   2   2  -8 6322.92 231.812   5
   2   2  -8 6896.57 287.607   1
   2   2  -8 6308.81 312.090   3
   2   2  -7 399.973 70.2414   1
  -2  -2   7 430.409 64.1380   5
   2   2  -7 549.888 77.3922   4
   2   2  -7 455.985 64.5852   2
   2   2  -7 535.669 93.6085   3
   2   2  -7 539.187 70.8645   5
  -2  -2   6 33.8975 25.0111   1
  -2  -2   6 4.81894 25.1476   5
   2   2  -6-1.03535 21.5531   5
   2   2  -6 21.2737 23.2733   1
   2   2  -6 35.9511 26.5630   2
   2   2  -5 28719.2 509.843   5
   2   2  -5 28275.6 412.802   2
  -2  -2   5 28420.4 501.538   5
  -2  -2   5 28537.9 465.349   1
   2   2  -5 27394.4 500.973   1
   2   2  -4 2215.16 107.493   2
   2   2  -4 1884.72 128.192   1
  -2  -2   4 2108.05 139.732   5
  -2  -2   4 2089.43 122.979   1
  -2  -2   4 2198.53 129.343   4
   2   2  -4 2248.62 143.109   5
  -2  -2   3 15392.8 338.862   4
  -2  -2   3 14934.2 329.112   1
  -2  -2   3 14919.6 367.220   5
   2   2  -3 15394.5 374.678   5
   2   2  -2 845.255 90.6638   5
  -2  -2   2 809.372 80.5044   1
  -2  -2   2 908.240 83.9123   4
   2   2  -1 295.527 54.3794   5
   2   2   0 763.869 86.3741   5
   2   2   1 13611.2 357.211   5
  -2  -2  -2 1926.75 134.611   5
   2   2   2 2020.81 144.671   2
   2   2   2 1967.28 136.849   5
   2   2   3 18396.9 416.040   5
  -2  -2  -3 18977.4 415.398   5
   2   2   4 1020.75 98.7170   5
  -2  -2  -4 1019.84 97.5025   5
   2   2   5 573.272 74.2051   5
  -2  -2  -5 504.069 71.3890   5
   2   2   6-5.03861 25.1726   5
   2   2   7 11684.0 322.496   5
   2   2   7 11935.9 468.273   2
   2   2   8 32.7824 24.8536   5
   2   2   8 27.5265 39.3071   2
   2   2   9 635.293 75.1926   5
   2   2   9 698.446 129.897   2
   2   2  10 221.438 43.9322   5
   2   2  10 139.314 75.0470   2
   2   2  11 671.549 69.9267   5
   2   2  11 661.122 142.870   2
   2   2  12 5116.10 395.555   2
   2   2  13 239.480 100.473   2
   2   2  14 145.648 84.1503   2
   2   2  15 380.561 140.661   2
   2   2  16 167.299 113.769   2
   2   3 -16 693.127 146.332   4
   2   3 -16 548.755 123.554   3
   2   3 -15 56.6117 56.6267   4
   2   3 -15 9.03168 42.6610   3
   2   3 -14 4.23498 37.1726   4
   2   3 -14 89.6226 60.7709   3
   2   3 -13 95.6869 61.7039   3
   2   3 -13 145.146 67.5355   4
   2   3 -12 2167.17 205.341   4
   2   3 -12 1703.07 188.429   3
   2   3 -12 1656.92 131.471   5
   2   3 -12 1665.33 168.707   2
   2   3 -11 1611.10 131.883   5
   2   3 -11 1583.82 180.480   3
   2   3 -11 1711.76 174.302   4
   2   3 -11 1699.75 162.634   2
   2   3 -10 19143.9 545.853   1
   2   3 -10 18638.8 450.434   5
   2   3 -10 20142.8 594.529   3
   2   3 -10 18685.4 512.371   2
   2   3  -9 107.766 43.7796   2
   2   3  -9 262.383 71.5995   4
   2   3  -9 168.046 67.3526   3
   2   3  -9 187.815 48.4618   5
   2   3  -9 176.264 58.3615   1
   2   3  -8 479.552 74.6937   5
   2   3  -8 446.331 82.1202   4
   2   3  -8 368.793 73.2674   1
   2   3  -8 410.923 72.0070   2
   2   3  -8 245.449 73.3098   3
   2   3  -7 9872.05 322.984   2
   2   3  -7 9759.07 349.553   4
   2   3  -7 9494.26 330.231   1
   2   3  -7 9670.36 397.575   3
   2   3  -7 9591.66 326.580   5
   2   3  -6 334.267 60.9307   1
   2   3  -6 355.392 66.8573   5
  -2  -3   6 328.194 53.3487   1
   2   3  -6 269.067 54.0194   2
   2   3  -5 11160.3 332.936   1
  -2  -3   5 12016.6 305.714   1
   2   3  -5 11778.9 306.806   2
   2   3  -5 12208.1 371.410   5
  -2  -3   4 12950.4 350.539   4
  -2  -3   4 13415.1 314.782   1
   2   3  -4 13166.5 386.155   5
  -2  -3   3 9997.18 276.997   1
   2   3  -3 10033.7 338.759   5
  -2  -3   3 9888.04 308.068   4
  -2  -3   2 29745.1 495.707   1
  -2  -3   2 30868.1 552.869   4
   2   3  -2 30463.8 588.712   5
   2   3  -1 8669.75 315.803   5
   2   3   0-8.28385 20.6768   5
   2   3   1 14343.5 405.164   5
   2   3   2 848.864 100.096   5
  -2  -3  -2 808.155 102.091   5
   2   3   3 9.02391 20.7330   5
  -2  -3  -3 42.0466 42.6711   5
  -2  -3  -4 5828.90 259.881   5
   2   3   4 5653.51 255.036   5
  -2  -3  -5 56.6613 36.5244   5
   2   3   5 92.0430 37.8570   5
  -2  -3  -6 12958.3 388.323   5
   2   3   6 12798.3 481.389   2
   2   3   6 12472.9 375.660   5
   2   3   7 54.4286 54.7135   2
   2   3   7 114.921 42.1652   5
  -2  -3  -7 122.076 42.2684   5
   2   3   8-9.92865 39.4996   2
   2   3   8-30.2859 27.4824   5
   2   3   9 2519.09 169.549   5
   2   3   9 2461.94 249.141   2
   2   3  10 626.040 136.331   2
   2   3  10 514.322 78.3570   5
   2   3  11 402.312 124.733   2
   2   3  11 530.498 78.0862   5
   2   3  12 66.7987 77.6896   2
   2   3  13-161.757 86.6287   2
   2   3  14-56.1182 89.6185   2
   2   3  15 268.364 111.388   2
   2   4 -16 250.273 90.2882   3
   2   4 -15 238.629 83.5117   3
   2   4 -15 102.073 57.6835   4
   2   4 -14 861.775 154.220   4
   2   4 -14 860.645 146.516   3
   2   4 -13 69.7202 42.1776   4
   2   4 -13 95.5359 62.3763   3
   2   4 -12 86.3978 58.7831   4
   2   4 -12 29.1315 44.7681   3
   2   4 -11 180.658 53.5406   5
   2   4 -11 78.8461 53.2110   4
  -2  -4  11 183.026 57.8438   5
   2   4 -11 130.215 49.9520   2
   2   4 -11 75.6794 56.8009   3
  -2  -4  10 255.747 68.5511   5
   2   4 -10 255.500 65.5523   1
   2   4 -10 269.191 65.1804   5
   2   4 -10 85.3369 43.7243   2
   2   4 -10 248.792 71.2208   3
   2   4 -10 201.875 69.8022   4
   2   4  -9 10181.8 395.868   2
   2   4  -9 10588.5 421.000   4
   2   4  -9 9985.51 375.662   5
   2   4  -9 10735.8 440.333   3
   2   4  -9 9803.64 372.934   1
  -2  -4   9 10363.4 387.772   5
   2   4  -8 745.237 105.470   5
   2   4  -8 671.360 99.9448   2
  -2  -4   8 701.771 106.239   5
   2   4  -8 890.473 124.522   4
   2   4  -8 659.468 94.2344   1
   2   4  -8 600.958 107.526   3
   2   4  -7 7560.38 306.220   1
  -2  -4   7 8806.24 359.253   5
   2   4  -7 8898.28 369.265   4
   2   4  -7 8868.88 333.614   2
   2   4  -7 8791.17 351.834   5
  -2  -4   6 11354.3 405.808   5
   2   4  -6 11308.9 356.946   1
   2   4  -6 12010.0 408.521   5
   2   4  -6 11426.2 358.869   2
   2   4  -5 590.551 94.4358   5
   2   4  -5 408.310 70.1612   2
  -2  -4   5 468.050 76.1993   4
  -2  -4   5 368.321 58.4896   1
  -2  -4   5 411.653 81.6650   5
  -2  -4   4 24.4790 25.8086   1
  -2  -4   4 12.0874 34.0738   5
   2   4  -4 31.8852 36.7425   5
  -2  -4   4-6.19119 25.3958   4
  -2  -4   3 16178.2 436.625   4
  -2  -4   3 14672.0 456.861   5
   2   4  -3 15874.2 467.446   5
  -2  -4   3 15435.2 360.088   1
  -2  -4   2 269.264 52.0312   1
  -2  -4   2 288.811 60.4391   4
   2   4  -2 358.609 75.7815   5
   2   4  -1 6256.93 294.436   5
   2   4   0 15102.8 458.031   5
   2   4   1-9.13401 33.4874   5
   2   4   2 723.228 103.136   5
  -2  -4  -2 815.602 113.161   5
   2   4   3 64.5550 28.3568   5
  -2  -4  -3 212.336 69.1106   5
   2   4   4 592.560 95.2566   5
  -2  -4  -4 448.191 87.9896   5
  -2  -4  -5 315.819 77.0889   5
   2   4   5 217.887 57.9045   5
   2   4   5 232.813 71.2525   2
   2   4   6 363.936 97.2328   2
  -2  -4  -6 513.387 91.4405   5
   2   4   6 428.147 79.2724   5
  -2  -4  -7 1033.18 124.821   5
   2   4   7 1124.01 171.408   2
   2   4   7 1117.09 126.934   5
   2   4   8-27.6477 50.1688   2
  -2  -4  -8 0.83568 37.1596   5
   2   4   8-42.6287 34.2049   5
   2   4   9 45.6130 33.5280   5
   2   4   9 31.2072 44.6861   2
   2   4  10 3390.21 221.828   5
   2   4  10 3470.85 325.427   2
   2   4  11 5.26653 52.7826   2
   2   4  12 1274.79 215.833   2
   2   4  13 412.819 143.808   2
   2   4  14 59.3198 66.0174   2
   2   5 -15 51.2189 46.7020   3
   2   5 -14 856.292 154.993   4
   2   5 -14 686.229 130.766   3
   2   5 -13 163.675 76.0319   4
   2   5 -13 81.6084 53.8371   3
  -2  -5  12 530.770 102.034   5
   2   5 -12 603.347 118.454   3
   2   5 -12 482.177 110.839   4
  -2  -5  11 16.6874 32.7025   5
   2   5 -11-56.9011 52.4585   4
   2   5 -11-40.9847 53.0470   3
   2   5 -10-76.3157 44.9583   5
   2   5 -10 9.05981 23.4608   1
  -2  -5  10 24.9364 45.3490   5
   2   5 -10 51.2712 52.5743   4
   2   5 -10-31.8135 34.6266   2
   2   5 -10 26.6926 44.9681   3
   2   5  -9-13.0340 53.9442   4
  -2  -5   9 31.4028 46.7418   5
   2   5  -9 45.8821 47.2687   3
   2   5  -9 70.8200 38.5844   5
   2   5  -9 114.723 49.8914   2
   2   5  -9 79.4654 43.8122   1
   2   5  -8 535.018 101.879   5
  -2  -5   8 474.898 97.5674   5
   2   5  -8 484.538 86.0058   1
   2   5  -8 485.237 105.365   3
   2   5  -8 460.257 93.5107   2
  -2  -5   7 621.877 113.177   5
   2   5  -7 536.811 106.362   3
   2   5  -7 601.892 96.7426   2
   2   5  -7 773.968 118.186   5
   2   5  -6 9115.57 396.279   5
   2   5  -6 8117.52 341.044   2
  -2  -5   6 8599.10 386.478   5
   2   5  -5 3469.77 244.847   5
  -2  -5   5 3310.69 166.333   1
  -2  -5   5 3594.11 252.313   5
   2   5  -4 3246.26 234.750   5
  -2  -5   4 3257.34 168.453   1
  -2  -5   4 3313.93 240.220   5
   2   5  -3 1520.39 161.534   5
  -2  -5   3 1774.06 159.614   4
  -2  -5   3 1447.66 116.878   1
  -2  -5   3 1630.30 169.586   5
   2   5  -2 1.71633 20.1617   5
  -2  -5   2-39.7283 36.4655   1
  -2  -5   2-10.2551 38.4734   5
  -2  -5   2-111.873 46.3784   4
   2   5  -1 9330.44 396.029   5
  -2  -5   1 8436.61 380.590   5
   2   5   0 64.4283 49.2458   5
  -2  -5   0 153.838 63.7062   5
  -2  -5  -1 5992.87 322.183   5
   2   5   1 6232.76 324.243   5
   2   5   2 6623.02 332.046   5
  -2  -5  -2 6352.57 331.368   5
  -2  -5  -3 2329.69 202.789   5
   2   5   3 2445.24 203.498   5
   2   5   4 1644.82 168.698   5
  -2  -5  -4 1578.77 166.322   5
   2   5   5 1357.80 186.509   2
   2   5   5 1685.41 173.989   5
  -2  -5  -5 1694.25 173.912   5
   2   5   6 145.873 58.1863   5
   2   5   6 212.546 89.0544   2
  -2  -5  -6 88.2574 49.3220   5
  -2  -5  -7 1811.16 178.961   5
   2   5   7 1880.12 182.858   5
  -2  -5  -8 3482.13 246.868   5
   2   5   8 3109.39 236.567   5
   2   5   8 3574.83 323.574   2
   2   5   9 598.439 143.749   2
  -2  -5  -9 928.120 128.813   5
   2   5   9 719.997 114.862   5
   2   5  10 722.323 161.134   2
   2   5  11 785.430 177.868   2
   2   5  12 108.537 76.9147   2
   2   5  13 782.233 187.061   2
   2   6 -15 23.7253 50.8212   3
   2   6 -14-51.7442 72.4863   3
   2   6 -13-92.6759 80.0260   4
   2   6 -13-74.7646 58.1696   3
  -2  -6  12 86.2651 52.0112   5
   2   6 -12 52.9899 61.5444   4
   2   6 -12-36.6468 51.6874   3
   2   6 -11 1081.03 171.966   4
  -2  -6  11 1184.55 161.480   5
   2   6 -11 1138.28 160.298   3
   2   6 -10-31.9379 53.9914   3
  -2  -6  10 77.0906 57.3832   5
  -2  -6   9-0.62490 27.8791   5
   2   6  -9-10.1417 53.5132   3
   2   6  -9 59.4850 39.5407   2
  -2  -6   8 242.766 78.4604   5
   2   6  -8 330.416 90.3284   3
   2   6  -8 254.848 73.0300   2
   2   6  -7 2278.74 205.226   2
   2   6  -7 2380.92 217.125   3
  -2  -6   7 2710.00 240.414   5
   2   6  -6 452.267 91.8490   2
  -2  -6   6 664.247 123.865   5
  -2  -6   5 6720.86 237.038   1
  -2  -6   5 6843.14 377.270   5
  -2  -6   4 776.864 135.882   5
  -2  -6   4 771.420 83.5343   1
  -2  -6   3 2763.60 240.386   5
  -2  -6   3 2899.85 165.514   1
  -2  -6   2 3772.01 278.806   5
  -2  -6   2 3414.80 188.841   1
  -2  -6   1 124.938 56.9610   5
  -2  -6   0-22.9059 60.1855   5
  -2  -6  -1 11103.9 476.527   5
  -2  -6  -2 6095.45 354.977   5
  -2  -6  -3 2153.99 212.722   5
  -2  -6  -4 18075.2 606.949   5
  -2  -6  -5 23.6038 47.8023   5
   2   6   6 1319.07 200.369   2
  -2  -6  -6 1093.94 151.241   5
   2   6   7 747.635 162.956   2
  -2  -6  -7 575.094 111.780   5
  -2  -6  -8 558.864 113.148   5
   2   6   8 404.841 128.974   2
  -2  -6  -9 1204.42 157.266   5
   2   6   9 1057.45 200.972   2
   2   6  10 95.1954 70.5823   2
   2   6  11 313.066 127.390   2
   2   7 -14 90.9217 59.5640   3
  -2  -7  13 480.474 110.751   5
   2   7 -13 311.226 96.1665   3
  -2  -7  12 117.645 69.9973   5
   2   7 -12 200.553 74.4083   3
  -2  -7  11 60.1813 50.8464   5
   2   7 -11 28.0291 47.5571   3
  -2  -7  10 1267.87 180.885   5
   2   7 -10 1250.95 165.493   3
  -2  -7   9 9.54483 43.3669   5
   2   7  -9-99.7411 56.3841   3
   2   7  -8 1969.19 197.676   3
  -2  -7   8 1918.30 218.836   5
  -2  -7   7 1.08551 41.4246   5
   2   7  -7-6.40314 41.3300   3
  -2  -7   6 14.7397 54.9655   5
  -2  -7   5 2026.69 126.951   1
  -2  -7   5 1766.89 209.818   5
  -2  -7   4 1189.89 176.875   5
  -2  -7   4 1027.53 93.3459   1
  -2  -7   3 1055.23 163.373   5
  -2  -7   3 832.218 89.1834   1
  -2  -7   2 6809.08 403.701   5
  -2  -7   1 813.658 144.554   5
  -2  -7   0-28.0070 46.0288   5
  -2  -7  -1 321.571 99.9763   5
  -2  -7  -2 139.533 76.0844   5
  -2  -7  -3-15.4600 52.6853   5
  -2  -7  -4 3426.92 287.954   5
  -2  -7  -5 543.562 121.943   5
  -2  -7  -6 1458.02 189.768   5
   2   7   6 2006.48 260.059   2
   2   7   7 747.747 168.744   2
  -2  -7  -7 1324.87 183.562   5
   2   7   8 2890.62 325.645   2
  -2  -7  -8 2410.02 238.959   5
  -2  -7  -9 257.242 83.9980   5
   2   7   9 96.1185 100.047   2
  -2  -7 -10 246.556 79.4470   5
   2   7  10 267.110 105.342   2
  -2  -8  12-2.15023 43.9065   5
  -2  -8  11 1257.09 196.973   5
  -2  -8  10 711.354 153.032   5
   2   8 -10 916.496 143.827   3
  -2  -8   9 730.566 151.902   5
   2   8  -9 755.009 128.648   3
   2   8  -8 220.636 65.3856   3
  -2  -8   8 261.839 94.7392   5
   2   8  -7 1892.68 192.230   3
  -2  -8   7 1898.21 235.566   5
   2   8  -6 2323.11 214.704   3
  -2  -8   6 2199.53 251.290   5
  -2  -8   5 215.863 99.6492   5
  -2  -8   4 55.3238 57.3345   5
  -2  -8   4 54.3386 23.4784   1
  -2  -8   3 631.674 141.512   5
  -2  -8   3 789.298 83.2393   1
  -2  -8   2 7.76748 49.1890   5
  -2  -8   1 1418.33 205.310   5
  -2  -8   0 533.410 84.1199   1
  -2  -8   0 607.556 134.078   5
  -2  -8  -1 38.6970 60.6782   5
  -2  -8  -2 1064.18 177.416   5
  -2  -8  -3 645.936 139.638   5
  -2  -8  -4 744.641 150.196   5
  -2  -8  -5 67.4134 58.3502   5
   2   8   6 205.701 119.656   2
  -2  -8  -6 208.632 86.7505   5
   2   8   7 405.417 123.790   2
  -2  -8  -7 309.517 100.321   5
  -2  -8  -8-50.0333 57.7719   5
   2   8   8 39.6938 64.0891   2
  -2  -8  -9 75.4624 45.5566   5
  -2  -9  11 282.562 104.575   5
  -2  -9  10 52.9934 52.3152   5
  -2  -9   9 94.3524 67.1830   5
  -2  -9   8 1909.40 252.403   5
  -2  -9   7-25.0737 59.5277   5
  -2  -9   6 639.495 154.365   5
  -2  -9   5 285.450 110.114   5
  -2  -9   4 146.599 90.2101   5
  -2  -9   3 490.217 131.305   5
  -2  -9   2 12.7794 47.9939   5
  -2  -9   1-58.5628 59.1745   5
  -2  -9   0 75.0499 71.0323   5
  -2  -9  -1-64.3660 57.3233   5
  -2  -9  -2 455.764 129.746   5
  -2  -9  -3-59.8976 80.3924   5
  -2  -9  -4-30.8739 68.3554   5
  -2  -9  -5 248.554 90.8656   5
  -2  -9  -6 644.282 146.039   5
  -2  -9  -7 435.993 132.594   5
  -2  -9  -8 146.683 82.1899   5
   3 -11  -9 261.850 105.697   5
   3 -11  -8-16.3758 54.1438   5
   3 -11  -7 459.621 126.600   5
   3 -11  -6 444.356 116.719   5
   3 -11  -5 1203.25 199.266   5
   3 -11  -4 236.286 99.2077   5
   3 -11  -3 304.729 109.936   5
   3 -11  -2 140.707 79.2477   5
   3 -11  -1 1155.85 196.374   5
   3 -11   0 116.292 81.3543   5
   3 -11   1 81.9645 64.5643   5
   3 -11   2 112.945 93.2109   5
   3 -11   3 94.2931 76.8543   5
   3 -11   4 153.342 83.4281   5
   3 -11   5 85.0696 50.7366   5
   3 -11   6 225.043 89.2462   5
   3 -11   7 92.9342 53.8266   5
   3 -11   8 273.306 109.602   5
   3 -11   9 108.119 76.3818   5
   3 -11  10-89.7304 63.1791   5
   3 -10 -10 419.150 120.864   5
   3 -10  -9 578.354 136.196   5
   3 -10  -8 951.749 161.725   5
   3 -10  -7 29.6418 56.2887   5
   3 -10  -6-31.6172 65.2665   5
   3 -10  -5 746.657 147.842   5
   3 -10  -4 1339.36 198.141   5
   3 -10  -3 4.75254 56.0168   5
   3 -10  -2 3528.05 310.013   5
   3 -10  -1 1281.09 193.233   5
   3 -10   0 2609.09 269.663   5
   3 -10   1 2316.87 254.956   5
   3 -10   2 275.969 114.065   5
   3 -10   3 1678.69 220.147   5
   3 -10   4 3066.22 296.170   5
   3 -10   5 106.522 74.5954   5
   3 -10   6 286.671 103.118   5
   3 -10   7 403.589 111.929   5
   3 -10   8 23.1178 55.3436   5
   3 -10   9 878.483 166.587   5
   3 -10  10 480.621 124.353   5
   3 -10  11 487.279 135.309   5
   3 -10  12-27.3738 44.3586   5
  -3   9  11-76.8064 69.2670   2
   3  -9 -10-67.0909 51.9329   5
   3  -9  -9 263.065 85.2021   5
   3  -9  -8 666.030 125.459   5
   3  -9  -7 84.1964 61.5104   5
   3  -9  -6 62.9755 53.0551   5
   3  -9  -5 444.426 105.936   5
   3  -9  -4 1321.96 180.902   5
   3  -9  -4 1223.26 111.136   1
   3  -9  -3 68.5853 60.0217   5
   3  -9  -3 36.9466 20.8766   1
   3  -9  -2 276.935 87.8709   5
   3  -9  -2 269.949 41.1044   1
   3  -9  -1 1372.62 184.127   5
   3  -9   0 177.431 85.8595   5
   3  -9   1 1545.05 193.464   5
   3  -9   2-0.34577 40.2708   5
   3  -9   3 356.552 112.283   5
   3  -9   4 6254.55 386.790   5
   3  -9   5 169.454 84.0417   5
   3  -9   6 87.5146 47.5614   5
   3  -9   7 714.488 139.473   5
   3  -9   8 447.013 107.803   5
   3  -9   9 506.407 117.789   5
  -3   9  -9 729.694 143.394   4
  -3   9 -10 1022.39 165.612   4
   3  -9  10 767.161 139.944   5
  -3   9 -11 70.2976 56.8687   4
   3  -9  11 4.40151 41.7133   5
   3  -9  12 135.805 66.0655   5
  -3   9 -12 136.839 73.6629   4
  -3   8  13 347.477 126.677   2
  -3   8  12 815.599 179.877   2
   3  -8 -11 49.1645 40.9597   5
  -3   8  11-50.9937 63.3765   2
   3  -8 -10 67.2436 51.7985   5
   3  -8  -9 940.936 137.822   5
   3  -8  -8 193.500 69.0652   5
   3  -8  -7-18.4828 34.4753   1
   3  -8  -7 85.5247 52.4343   5
   3  -8  -6 7398.60 308.994   1
   3  -8  -6 8193.55 403.914   5
   3  -8  -5 880.780 138.398   5
   3  -8  -5 980.882 107.335   1
   3  -8  -4 1975.28 139.328   1
   3  -8  -4 2117.73 209.619   5
   3  -8  -3 5278.14 205.973   1
   3  -8  -3 5305.03 329.724   5
   3  -8  -2 314.009 95.9316   5
   3  -8  -2 154.757 46.2925   4
   3  -8  -2 258.617 44.6681   1
   3  -8  -1 47.0128 16.8464   1
   3  -8  -1 22.6321 21.2797   4
   3  -8  -1 82.2506 62.9098   5
   3  -8   0 1883.15 197.721   5
   3  -8   0 1732.87 142.154   4
   3  -8   1 2051.21 153.407   4
   3  -8   1 2349.99 221.558   5
   3  -8   2 4255.96 299.033   5
   3  -8   3 4094.32 292.341   5
   3  -8   4 1814.92 200.581   5
   3  -8   5 682.013 127.956   5
   3  -8   6 12034.8 500.995   5
  -3   8  -7 8308.62 393.885   4
   3  -8   7 7968.15 408.934   5
   3  -8   8 157.486 58.2700   5
  -3   8  -8 190.392 75.2853   4
   3  -8   9 32.3720 41.6342   5
  -3   8  -9 64.9395 50.4174   4
  -3   8 -10 241.792 79.5832   4
   3  -8  10 141.964 63.1408   5
   3  -8  11-59.3750 45.3843   5
  -3   8 -11 71.7393 60.0617   4
   3  -8  12 323.451 90.0794   5
  -3   8 -12 438.709 106.813   4
  -3   8 -13 255.213 91.8771   4
  -3   7  15 39.0227 66.4818   2
  -3   7  14 170.067 87.4594   2
  -3   7  13 877.739 177.301   2
  -3   7  12 98.0298 73.1162   2
   3  -7 -11 824.444 116.295   5
  -3   7  11 888.061 167.968   2
   3  -7 -10 88.2128 42.3696   5
   3  -7  -9 429.590 91.1445   5
   3  -7  -8 52.1849 49.8027   5
   3  -7  -7 863.499 125.195   5
   3  -7  -7 926.734 111.976   1
   3  -7  -6 9161.46 336.380   1
   3  -7  -6 9935.51 410.578   5
   3  -7  -5 1598.26 132.681   1
   3  -7  -5 1875.78 182.983   5
   3  -7  -4 4102.42 268.249   5
   3  -7  -4 4272.76 201.623   1
   3  -7  -3 213.240 45.1979   1
   3  -7  -3 288.487 82.3811   5
   3  -7  -2 30.8810 46.4374   5
   3  -7  -2 16.0175 14.8083   1
  -3   7   1 3469.37 296.140   5
   3  -7  -1 3562.74 133.416   1
   3  -7  -1 3314.59 179.565   4
   3  -7  -1 3767.42 256.114   5
  -3   7   0-15.6934 38.0351   5
   3  -7   0-28.6242 47.7893   5
   3  -7   0 33.3198 25.5472   4
  -3   7  -1 28.1547 48.5602   5
   3  -7   1-5.09162 53.0750   5
   3  -7   1 25.2147 20.8923   4
  -3   7  -2 2695.39 231.373   2
   3  -7   2 2262.34 203.771   5
  -3   7  -2 2513.68 252.297   5
   3  -7   3 6.45558 40.6832   5
   3  -7   4 2406.78 210.080   5
   3  -7   5 188.704 69.7048   5
  -3   7  -5 271.402 67.5310   4
   3  -7   6 1119.58 145.197   5
  -3   7  -6 1035.44 128.524   4
  -3   7  -7 159.307 25.9701   1
  -3   7  -7 179.891 60.7064   4
   3  -7   7 202.003 80.0884   5
  -3   7  -8 1107.16 141.700   4
  -3   7  -8 965.708 76.8912   1
   3  -7   8 1025.65 139.048   5
  -3   7  -9 7927.58 374.027   4
  -3   7  -9 8166.98 259.547   1
   3  -7   9 8173.92 379.900   5
   3  -7  10 838.490 123.711   5
  -3   7 -10 886.540 133.164   4
  -3   7 -11 2504.63 225.732   4
   3  -7  11 2585.87 215.425   5
   3  -7  12 133.970 57.3327   5
  -3   7 -12 136.079 65.0990   4
  -3   7 -13 95.7687 69.9086   4
   3  -7  13-58.2204 37.5308   5
  -3   7 -14 772.666 146.801   4
  -3   6  16 334.485 123.461   2
  -3   6  15 88.4516 66.0993   2
  -3   6  14 550.556 143.648   2
  -3   6  13-19.8710 49.4686   2
   3  -6 -12 43.8870 32.0654   5
  -3   6  12 17.2419 52.3090   2
   3  -6 -11 90.8810 41.9995   5
  -3   6  11 54.2599 64.3175   2
  -3   6  10 1735.56 207.259   2
   3  -6 -10 1420.16 138.681   5
   3  -6  -9 642.188 97.4288   5
   3  -6  -8 19878.7 527.675   5
   3  -6  -7 253.022 70.6569   5
   3  -6  -7 272.768 62.3695   1
   3  -6  -6 5652.08 258.821   1
   3  -6  -6 6521.17 310.733   5
   3  -6  -5 654.036 103.387   5
   3  -6  -5 741.970 90.2757   1
   3  -6  -4 426.025 64.6264   1
   3  -6  -4 559.000 95.4876   5
   3  -6  -3 1279.18 143.863   5
   3  -6  -3 1297.84 101.752   1
   3  -6  -2 12531.4 288.130   1
   3  -6  -2 13121.7 443.029   5
   3  -6  -1 463.899 52.6324   1
   3  -6  -1 411.515 56.6256   4
   3  -6   0 9405.02 259.466   4
   3  -6   1 5188.14 193.706   4
  -3   6  -2 75.1561 43.1599   2
   3  -6   3 286.961 79.9022   5
  -3   6  -3 186.982 67.1272   2
  -3   6  -4 1151.65 50.8915   1
   3  -6   4 1125.17 89.6323   3
  -3   6  -4 1127.65 146.480   2
   3  -6   4 1223.31 141.432   5
  -3   6  -5 73.5443 39.9545   4
   3  -6   5 3.16615 19.0033   3
   3  -6   5 35.4073 33.7673   5
  -3   6  -5 105.516 52.5731   2
   3  -6   6 1177.20 144.390   5
  -3   6  -6 931.610 148.269   2
   3  -6   7 559.650 98.0099   5
  -3   6  -7 549.060 91.2708   4
   3  -6   7 500.600 83.4497   3
   3  -6   8 956.656 122.019   5
  -3   6  -8 1001.94 123.410   4
   3  -6   8 880.886 120.312   3
   3  -6   9 108.039 57.9822   5
  -3   6  -9 10.9477 43.1913   4
   3  -6   9 80.6603 46.3376   3
   3  -6  10 4518.48 259.954   5
  -3   6 -10 3750.78 249.325   4
   3  -6  11 1166.99 176.899   2
  -3   6 -11 1030.75 140.884   4
   3  -6  11 914.520 117.505   5
  -3   6 -11 1154.33 144.935   1
   3  -6  12 717.374 104.370   5
   3  -6  12 644.802 141.375   2
   3  -6  13 405.726 126.214   2
   3  -6  13 258.222 67.1865   5
   3  -6  14 48.0565 63.3735   2
   3  -6  15 183.427 89.3480   2
   3  -6  16 680.098 161.344   2
  -3   5  17 746.473 188.994   2
  -3   5  16 70.6648 64.7271   2
  -3   5  15 1087.96 185.704   2
  -3   5  14 240.896 86.4923   2
  -3   5  13 81.4696 63.6884   2
   3  -5 -12 590.985 75.9647   5
  -3   5  12 653.323 136.454   2
  -3   5  11 1257.07 172.429   2
   3  -5 -11 1404.01 119.495   5
  -3   5  10 1782.19 195.782   2
   3  -5 -10 1784.48 139.707   5
   3  -5  -9 7414.95 288.100   5
   3  -5  -8 9536.43 324.746   3
   3  -5  -8 9670.20 363.038   1
   3  -5  -8 10025.2 339.094   5
   3  -5  -7 6015.69 274.370   1
   3  -5  -7 7236.31 293.091   5
   3  -5  -6 1189.30 124.189   5
   3  -5  -6 1023.07 92.8848   3
   3  -5  -6 1115.62 114.974   1
   3  -5  -5 13501.3 302.828   3
   3  -5  -5 13668.6 370.807   1
   3  -5  -5 13474.5 411.964   5
   3  -5  -4 2048.33 165.967   5
   3  -5  -4 1835.90 101.893   3
   3  -5  -4 1783.87 127.072   1
   3  -5  -3 138.062 34.8784   1
   3  -5  -3 230.235 61.2076   5
   3  -5  -3 236.932 36.2068   3
   3  -5  -2 1800.95 111.211   1
   3  -5  -2 1742.17 75.6092   3
   3  -5  -1 5656.13 179.826   1
   3  -5  -1 5582.89 173.534   4
   3  -5  -1 5830.69 113.120   3
   3  -5   0 3223.16 128.498   4
  -3   5   0 3449.70 108.978   1
  -3   5  -1 10036.9 364.696   2
  -3   5  -1 9482.38 163.479   1
  -3   5  -2 26456.7 600.094   2
  -3   5  -2 25255.3 281.655   1
  -3   5  -2 25787.9 422.272   4
   3  -5   2 26000.8 277.683   3
  -3   5  -3 3036.36 214.036   2
  -3   5  -3 3129.92 154.667   4
   3  -5   3 3106.39 117.758   3
   3  -5   4 6086.51 194.194   3
  -3   5  -4 6111.07 320.748   2
   3  -5   5 322.043 53.7940   3
  -3   5  -5 419.194 91.3427   2
   3  -5   6 1401.06 158.718   2
  -3   5  -6 1454.77 173.654   2
   3  -5   6 1522.04 122.551   3
   3  -5   7 6530.60 340.523   2
  -3   5  -7 7420.89 403.844   2
   3  -5   7 6844.69 284.617   3
   3  -5   8 803.972 126.792   2
   3  -5   8 692.513 101.232   3
   3  -5   9 25.7809 59.4518   2
   3  -5   9 62.9584 46.7809   3
   3  -5  10 1186.74 166.412   2
   3  -5  11 402.007 106.890   2
   3  -5  12 253.550 83.4413   2
   3  -5  13 2541.49 271.185   2
   3  -5  14 293.284 101.480   2
   3  -5  15 772.085 170.703   2
   3  -5  16 202.577 95.0686   2
  -3   4  17-37.1246 53.2095   2
  -3   4  16-25.4137 75.3936   2
  -3   4  15 103.073 65.3569   2
  -3   4  14 811.424 156.844   2
  -3   4  13-80.2155 61.5798   2
  -3   4  12 1614.60 190.680   2
   3  -4 -12 1642.99 101.474   5
   3  -4 -11 343.379 53.8750   5
   3  -4 -11 313.728 78.6262   3
  -3   4  11 291.404 84.7160   2
   3  -4 -10 9783.80 283.989   5
  -3   4  10 9198.15 404.404   2
   3  -4 -10 9160.69 362.178   3
  -3   4   9 25.3651 38.1637   2
   3  -4  -9 31.5082 24.8107   5
   3  -4  -9 21.3341 45.0753   3
   3  -4  -8 443.645 79.2319   1
   3  -4  -8 556.752 76.5307   5
   3  -4  -8 663.351 94.7755   3
   3  -4  -7 32.3036 29.5520   1
   3  -4  -7 28.5676 30.0744   5
   3  -4  -6 1361.67 124.030   1
   3  -4  -6 1474.70 131.856   5
   3  -4  -5 16037.1 365.675   3
   3  -4  -5 16396.0 401.664   1
   3  -4  -5 16591.8 437.283   5
   3  -4  -4 169166. 1199.88   1
   3  -4  -4 171730. 1444.46   5
   3  -4  -3 201.964 71.0389   5
   3  -4  -3 147.324 37.5133   3
   3  -4  -3 230.046 47.8330   1
   3  -4  -2 3421.91 215.153   5
   3  -4  -2 3367.87 153.916   1
  -3   4   2 3384.17 135.573   1
   3  -4  -1 24806.5 388.057   1
   3  -4  -1 24675.9 276.677   4
  -3   4   1 25247.5 345.496   1
  -3   4   0 14052.1 248.962   1
  -3   4  -1 598.682 53.6108   1
  -3   4  -1 712.363 56.3319   4
  -3   4  -1 579.341 82.9553   2
  -3   4  -2 5074.92 249.992   2
  -3   4  -2 5476.01 164.375   4
  -3   4  -3 22001.9 546.760   2
   3  -4   3 22952.9 557.160   5
  -3   4  -4 8243.87 355.349   2
   3  -4   4 7576.29 319.004   5
  -3   4  -5 23552.2 628.083   2
   3  -4   5 23130.2 414.068   3
  -3   4  -6 12400.4 480.093   2
   3  -4   6 11803.2 329.646   3
  -3   4  -7 1508.07 178.139   2
   3  -4   7 1384.79 161.288   2
   3  -4   7 1740.95 137.851   3
   3  -4   8-34.8099 63.5193   2
  -3   4  -8-108.003 57.7132   2
   3  -4   8-7.80923 31.2404   3
   3  -4   9-43.3693 64.3323   2
   3  -4   9-30.8539 43.7636   3
   3  -4  10 1206.85 173.383   2
   3  -4  10 1230.18 112.920   5
   3  -4  11 29.5455 23.6394   5
   3  -4  11 102.605 71.9909   2
   3  -4  12 1303.99 109.131   5
   3  -4  12 1281.87 192.541   2
   3  -4  13 343.159 52.4472   5
   3  -4  13 228.883 98.3725   2
   3  -4  14 50.2467 58.6646   2
   3  -4  15 214.282 101.561   2
   3  -4  16 160.161 104.923   2
   3  -4  17-17.8701 67.8505   2
  -3   3  16 342.570 106.800   2
  -3   3  15 43.4909 53.9466   2
  -3   3  14 582.934 124.090   2
   3  -3 -13 2188.53 207.196   3
  -3   3  13 1936.75 210.107   2
   3  -3 -12 7931.92 162.368   5
   3  -3 -12 8574.76 387.774   3
  -3   3  12 8580.88 415.111   2
   3  -3 -11 18745.9 312.992   5
   3  -3 -11 18655.4 547.972   3
  -3   3  11 18424.7 566.765   2
   3  -3 -10 3657.96 154.836   5
   3  -3 -10 3453.07 230.592   3
  -3   3  10 3727.03 241.146   2
   3  -3  -9 60.7674 38.5402   1
   3  -3  -9 68.6028 32.5836   5
   3  -3  -9 86.9353 49.5784   3
   3  -3  -8 13828.3 357.167   5
   3  -3  -8 14357.2 424.275   3
   3  -3  -8 14390.3 432.979   1
   3  -3  -7 192.113 48.4891   5
   3  -3  -7 156.450 48.6973   1
   3  -3  -6 6259.79 267.406   5
   3  -3  -6 6860.07 273.111   1
   3  -3  -5 212.848 52.2600   1
   3  -3  -5 153.659 51.3910   3
  -3   3   4 38900.4 541.621   1
   3  -3  -4 37143.1 567.271   1
   3  -3  -3 682.134 76.1870   1
  -3   3   3 642.752 70.0983   1
  -3   3   2 120488. 839.782   1
   3  -3  -2 116344. 906.674   1
   3  -3  -1 75344.5 701.978   1
  -3   3   1 77945.9 663.361   1
  -3   3   0 1352.47 92.0389   1
  -3   3   0 1397.75 51.3341   4
  -3   3  -1 5352.18 226.415   2
  -3   3  -2 229.914 54.6134   2
  -3   3  -3 1114.36 125.941   2
  -3   3  -4 11471.8 404.135   2
  -3   3  -5 1065.39 134.936   2
  -3   3  -6 5733.59 315.880   2
   3  -3   6 5258.97 260.999   5
  -3   3  -7 7320.66 375.088   2
   3  -3   7 7490.53 282.043   3
   3  -3   7 7295.50 297.787   5
  -3   3  -8 999.935 147.541   2
   3  -3   8 1160.21 122.588   3
   3  -3   8 1060.93 110.905   5
   3  -3   8 753.367 127.978   2
  -3   3  -9 2384.58 230.559   2
   3  -3   9 2137.07 219.719   2
   3  -3   9 2360.10 185.666   3
   3  -3   9 2335.73 152.672   5
   3  -3  10 7086.09 411.752   2
   3  -3  10 6489.29 237.739   5
   3  -3  11 70.4366 72.5535   2
   3  -3  11 19.5258 18.7632   5
   3  -3  12 2411.90 122.636   5
   3  -3  12 2553.15 269.444   2
   3  -3  13 145.411 73.2864   2
   3  -3  14 681.584 160.442   2
   3  -3  15-21.2246 57.9629   2
   3  -3  16-163.409 95.5270   2
   3  -3  17 92.2923 57.9016   2
  -3   2  16 616.337 131.746   2
   3  -2 -15 99.8057 58.8714   3
  -3   2  15-17.3597 43.7077   2
   3  -2 -14 933.113 144.077   3
  -3   2  14 803.410 139.799   2
  -3   2  13 295.718 87.5106   2
   3  -2 -13 289.807 81.9569   3
  -3   2  12 625.150 111.217   2
   3  -2 -12 524.319 102.204   3
   3  -2 -11 3616.96 249.182   3
   3  -2 -11 3779.62 121.684   5
   3  -2 -11 4036.65 134.699   5
   3  -2 -10 40.6823 24.7753   5
   3  -2 -10 20.2011 41.3494   3
   3  -2  -9 9228.16 370.391   3
   3  -2  -9 9600.33 374.116   1
  -3   2   9 9031.64 323.776   2
   3  -2  -9 9055.89 276.375   5
   3  -2  -8 3420.45 216.543   3
   3  -2  -8 3539.90 217.210   1
  -3   2   8 3561.60 186.919   2
  -3   2   7 328.039 53.1023   2
   3  -2  -7 382.005 70.4970   1
  -3   2   6 527.952 60.5641   2
   3  -2  -6 470.638 71.1184   1
   3  -2  -5 1227.39 110.067   1
   3  -2  -4 6159.31 234.892   1
   3  -2  -3 27992.4 477.641   1
  -3   2   3 27116.3 438.947   1
   3  -2  -2 15958.6 348.710   1
  -3   2   2 16163.1 329.388   1
  -3   2   1 282.587 46.1642   1
   3  -2  -1 373.779 54.1595   1
  -3   2   1 373.950 50.2817   2
  -3   2   0 5520.21 198.041   2
   3  -2   0 5407.12 181.300   2
  -3   2   0 5596.24 196.429   1
   3  -2   1 64368.7 698.880   2
  -3   2  -1 63243.8 730.263   2
   3  -2   2 67312.6 792.157   2
  -3   2  -2 67127.6 820.800   2
  -3   2  -3 15542.0 425.582   2
  -3   2  -4 21834.8 532.321   2
  -3   2  -5 556.084 91.2397   2
  -3   2  -6 953.512 127.644   2
  -3   2  -7 12575.3 470.428   2
   3  -2   8 3185.48 252.586   2
   3  -2   8 3335.25 202.505   3
  -3   2  -8 3222.80 251.668   2
   3  -2   9 5826.18 359.127   2
   3  -2   9 6094.85 294.390   3
   3  -2   9 5704.47 244.443   5
  -3   2  -9 6192.38 363.716   2
   3  -2  10 27718.8 815.691   2
   3  -2  10 27328.4 479.100   5
   3  -2  11 410.439 52.9023   5
   3  -2  11 422.332 120.668   2
   3  -2  12 2034.66 90.3400   5
   3  -2  12 2221.93 257.131   2
   3  -2  12 2084.51 94.6199   5
   3  -2  13 142.232 94.0452   2
   3  -2  14 623.071 159.436   2
   3  -2  15 324.679 129.026   2
   3  -2  16 344.285 122.876   2
   3  -2  17-176.271 99.1508   2
  -3   1  16 156.609 75.1474   2
   3  -1 -16-0.72249 50.2541   3
  -3   1  15 141.313 64.2589   2
   3  -1 -15 246.847 85.5706   3
  -3   1  14 3094.55 252.115   2
   3  -1 -14 2729.73 244.183   3
   3  -1 -13 3749.83 274.285   3
  -3   1  13 3813.88 266.872   2
   3  -1 -12 6879.00 360.008   3
   3  -1 -11 1547.90 82.6809   5
   3  -1 -11 1253.86 152.586   3
   3  -1 -11 1487.77 92.1582   5
   3  -1 -10 227.836 39.4293   5
  -3   1  10 271.069 63.4279   2
   3  -1 -10 324.924 82.8865   3
   3  -1  -9 4194.04 256.366   3
   3  -1  -9 4142.41 248.636   1
  -3   1   9 4289.24 210.565   2
   3  -1  -9 4237.70 163.919   5
   3  -1  -8 7285.03 312.646   1
  -3   1   8 7219.59 244.455   2
   3  -1  -7-2.10670 37.3651   1
  -3   1   7 4.10995 17.8028   2
   3  -1  -6 7082.73 277.249   1
  -3   1   6 6423.15 173.918   2
   3  -1  -5-4.61356 26.0183   1
  -3   1   5 10.5028 12.7909   2
   3  -1  -4 12912.9 228.518   4
   3  -1  -4 12424.4 341.077   1
   3  -1  -3 1026.70 94.5376   1
   3  -1  -3 1165.65 63.7880   4
  -3   1   3 1135.56 50.6073   2
  -3   1   2 5329.94 131.338   2
   3  -1  -2 5416.26 208.287   1
  -3   1   2 5176.97 115.286   4
  -3   1   1 25834.3 353.922   2
   3  -1  -1 26719.0 333.263   2
   3  -1   0 581.125 62.1074   2
  -3   1   0 511.214 57.8760   2
   3  -1   1 6405.68 224.357   2
  -3   1  -1 6430.33 221.057   2
   3  -1   2 6829.95 258.245   2
  -3   1  -2 7105.59 252.763   2
  -3   1  -3 161.479 49.7079   2
  -3   1  -4 32354.1 633.734   2
  -3   1  -5 19826.8 522.190   2
  -3   1  -6 889.680 118.276   2
  -3   1  -7 18657.6 567.916   2
   3  -1   8 12032.0 494.217   2
  -3   1  -8 12438.9 487.068   2
   3  -1   9 1063.06 88.5514   5
   3  -1   9 1228.18 171.110   2
   3  -1  10 5814.50 380.286   2
   3  -1  10 6579.15 209.496   5
   3  -1  11 2485.67 134.211   5
   3  -1  11 2438.53 263.182   2
   3  -1  11 2809.76 126.468   5
   3  -1  12 77.4228 19.5998   5
   3  -1  12 78.0317 16.6138   5
   3  -1  12 135.529 86.5123   2
   3  -1  13 3176.75 322.980   2
   3  -1  14 26.7034 57.0110   2
   3  -1  15 56.1903 73.5263   2
   3  -1  16 487.787 149.738   2
   3   0 -16-28.5966 64.6715   3
   3   0 -15 85.4477 63.3916   3
  -3   0  15 170.528 66.8188   2
   3   0 -14 52.2177 58.3407   3
  -3   0  14 99.4102 53.0262   2
   3   0 -13 1079.85 151.279   3
   3   0 -12 197.228 28.7436   5
   3   0 -12 194.860 84.4688   3
   3   0 -11 1383.26 165.510   3
  -3   0  11 1388.85 129.881   2
   3   0 -11 1445.04 90.3021   5
  -3   0  10 1609.29 126.622   2
   3   0 -10 1838.36 112.473   5
   3   0 -10 1718.94 179.396   3
  -3   0   9 1678.63 119.093   2
   3   0  -9 1522.23 162.723   3
   3   0  -9 1654.42 158.049   1
   3   0  -9 1596.90 110.699   5
   3   0  -8 66.0405 28.9613   5
  -3   0   8 118.766 33.0439   2
   3   0  -8 65.0438 37.7300   1
   3   0  -7 3.43293 18.7115   5
  -3   0   7-12.2837 17.7415   2
  -3   0   6 3828.51 92.5030   2
   3   0  -6 3768.95 206.470   1
   3   0  -6 4150.26 173.427   4
   3   0  -6 4139.35 180.740   5
   3   0  -5 407.776 58.7591   5
   3   0  -5 326.087 49.7360   4
   3   0  -5 345.109 65.1072   1
   3   0  -4 3422.27 183.106   1
   3   0  -4 3404.08 141.463   4
   3   0  -3 15545.3 381.910   1
  -3   0   3 15050.7 267.996   4
   3   0  -2 1706.08 69.7106   2
  -3   0   2 1620.31 88.9457   4
  -3   0   1 25444.8 319.555   2
   3   0  -1 26902.3 345.809   2
   3   0   0 181186. 1050.84   2
  -3   0   0 183267. 998.670   2
  -3   0  -1 16079.5 340.586   2
   3   0   1 16286.1 354.883   2
  -3   0  -2 41.6424 32.3137   2
   3   0   2 69.0736 43.8448   2
   3   0   3 19036.2 460.327   2
  -3   0  -3 19394.3 450.545   2
  -3   0  -4 1418.91 131.178   2
   3   0   5 22422.1 437.597   5
  -3   0  -5 23045.6 560.918   2
   3   0   6 21476.6 431.602   5
  -3   0  -6 22230.4 580.757   2
  -3   0  -7 2097.74 188.993   2
   3   0   7 2255.11 139.628   5
   3   0   8 7065.23 381.746   2
   3   0   8 6785.99 239.056   5
  -3   0  -8 7246.28 365.694   2
   3   0   9 20673.7 686.603   2
   3   0   9 21224.3 415.225   5
   3   0  10 15105.4 617.742   2
   3   0  10 15983.1 343.368   5
   3   0  11 3742.67 325.567   2
   3   0  11 4145.37 161.502   5
   3   0  12 6705.61 454.746   2
   3   0  12 6496.44 165.282   5
   3   0  13 507.023 141.642   2
   3   0  14 2249.37 287.408   2
   3   0  15 65.6180 54.0306   2
   3   0  16 50.7589 67.3740   2
   3   1 -16 1156.96 176.510   3
  -3  -1  15 50.4326 36.5900   2
   3   1 -15 69.7207 65.6229   3
   3   1 -14 5062.26 340.985   3
   3   1 -13 109.969 65.8394   3
  -3  -1  12 65.6673 36.8027   2
   3   1 -12-8.70691 18.0322   5
   3   1 -12 34.2529 55.4632   3
  -3  -1  11 3249.83 177.105   2
   3   1 -11 3349.76 261.010   3
   3   1 -11 2756.35 160.513   2
   3   1 -11 2838.66 150.215   5
  -3  -1  10 4004.30 178.300   2
   3   1 -10 4202.92 239.582   4
   3   1 -10 4211.82 281.112   3
   3   1 -10 4002.12 177.028   2
   3   1 -10 4068.75 187.057   5
  -3  -1   9 6510.96 206.116   2
   3   1  -9 6893.74 288.928   4
   3   1  -9 6749.52 320.237   1
   3   1  -9 6733.30 351.821   3
   3   1  -9 6295.03 241.279   5
   3   1  -9 6320.63 204.558   2
   3   1  -8 4091.75 242.291   1
   3   1  -8 4170.45 278.347   3
   3   1  -8 4494.42 221.254   4
   3   1  -8 4027.71 147.364   2
  -3  -1   8 4293.63 225.828   1
   3   1  -8 4241.87 202.413   5
   3   1  -7 249.756 33.4518   2
   3   1  -7 238.534 48.2165   5
   3   1  -7 293.313 57.1769   4
   3   1  -7 195.048 52.2678   1
  -3  -1   7 263.055 60.0895   1
   3   1  -6 345.018 58.2138   4
   3   1  -6 200.006 48.1728   5
   3   1  -6 365.801 67.9708   1
   3   1  -6 294.404 31.4694   2
   3   1  -5 75798.8 431.669   2
   3   1  -5 75827.7 802.016   4
   3   1  -5 76499.5 911.887   1
   3   1  -5 74506.6 848.075   5
   3   1  -4 7661.44 272.416   5
   3   1  -4 7239.11 126.930   2
  -3  -1   4 7219.61 222.709   4
   3   1  -4 7628.71 249.461   4
  -3  -1   4 7102.26 257.259   1
   3   1  -3-10.2859 21.4525   5
  -3  -1   3 12.4592 16.5850   4
  -3  -1   3 13.1991 27.3898   1
  -3  -1   2 11290.0 327.491   1
  -3  -1   2 11746.4 289.433   4
   3   1  -2 11814.0 222.542   2
   3   1  -2 11518.1 334.991   5
   3   1  -1 68.8336 23.8026   2
   3   1  -1 52.6477 33.8923   5
   3   1   0 1051.69 103.727   5
   3   1   0 968.367 85.2476   2
   3   1   1 3831.15 182.694   2
   3   1   1 4021.10 199.547   5
   3   1   2 15796.4 402.166   2
   3   1   2 15746.0 398.531   5
   3   1   3 29855.8 596.819   2
   3   1   3 29022.4 542.578   5
   3   1   4 10804.6 331.790   5
  -3  -1  -5 21733.9 554.247   2
   3   1   5 21034.5 467.595   5
  -3  -1  -6 1003.02 127.203   2
   3   1   6 1134.54 111.104   5
   3   1   7 227.999 49.8616   5
   3   1   7 166.619 60.2295   2
   3   1   8 6.91571 23.9484   5
   3   1   8 12.7934 51.6858   2
   3   1   9 20.3071 26.7137   5
   3   1   9-87.5407 63.0969   2
   3   1  10 30.1840 50.0784   2
   3   1  10 25.6775 22.0201   5
   3   1  11 25.6676 21.3079   5
   3   1  11 159.937 81.2389   2
   3   1  12 685.950 152.321   2
   3   1  13 976.184 190.065   2
   3   1  14 155.025 72.3110   2
   3   1  15 11.5138 67.3673   2
   3   2 -16 591.029 134.726   4
   3   2 -16 449.018 117.484   3
   3   2 -15 1471.72 198.398   4
   3   2 -15 1221.57 177.557   3
   3   2 -14 115.163 69.7286   4
   3   2 -14 11.4238 42.7920   3
   3   2 -13 130.781 62.4568   4
   3   2 -13 109.999 62.5786   3
   3   2 -12 12975.2 487.940   4
   3   2 -12 12256.7 511.414   3
   3   2 -12 11266.2 347.975   2
   3   2 -12 11083.4 328.219   5
   3   2 -11 8311.39 372.468   4
   3   2 -11 8100.39 412.985   3
   3   2 -11 7537.22 276.974   2
   3   2 -11 8040.87 289.037   5
   3   2 -10 411.466 61.0764   2
   3   2 -10 281.040 56.9886   5
   3   2 -10 265.422 65.8275   4
   3   2 -10 283.175 79.0120   3
   3   2  -9 6440.55 298.280   4
   3   2  -9 6577.65 323.775   1
   3   2  -9 6486.01 360.114   3
   3   2  -9 6374.94 268.284   5
   3   2  -9 6518.42 234.084   2
   3   2  -8 7026.33 317.077   1
   3   2  -8 6532.70 287.639   4
  -3  -2   8 6780.92 284.157   1
   3   2  -8 6284.52 267.702   5
   3   2  -8 6805.94 223.283   2
   3   2  -7 1815.20 111.172   2
   3   2  -7 1736.65 145.240   4
   3   2  -7 1709.22 153.388   1
  -3  -2   7 1759.16 139.903   1
   3   2  -7 1602.12 137.323   5
   3   2  -6 343.643 65.8989   5
   3   2  -6 285.217 65.0268   1
   3   2  -6 378.844 69.0142   4
   3   2  -6 410.561 50.5622   2
   3   2  -5 4431.37 152.620   2
   3   2  -5 4902.94 239.337   1
   3   2  -5 4736.82 237.049   5
   3   2  -4-3.30454 22.3256   5
  -3  -2   4-13.0515 24.3682   4
  -3  -2   4 18.2273 29.8831   1
  -3  -2   3 2087.50 146.672   1
  -3  -2   3 2283.85 144.374   4
   3   2  -3 2157.80 161.356   5
  -3  -2   2 122802. 1122.59   1
   3   2  -2 120999. 1193.95   5
   3   2  -1 2403.80 170.267   5
   3   2   0 7381.12 259.951   2
   3   2   0 7148.39 294.166   5
   3   2   1 2886.54 172.963   2
   3   2   1 2799.33 184.055   5
   3   2   2-7.82286 33.1196   5
   3   2   2-17.3026 30.3272   2
   3   2   3 767.708 106.001   2
   3   2   3 848.960 105.315   5
   3   2   4 7413.93 337.099   2
   3   2   4 7066.77 295.091   5
   3   2   5 52.0945 29.8759   5
   3   2   5 54.2582 51.8090   2
   3   2   6 3484.71 258.928   2
   3   2   6 3548.63 209.173   5
   3   2   7 1715.08 191.303   2
   3   2   7 1828.07 149.621   5
   3   2   8 434.262 73.3468   5
   3   2   8 497.510 118.616   2
   3   2   9 180.543 47.0269   5
   3   2   9 325.176 96.8607   2
   3   2  10 111.211 36.3366   5
   3   2  10 26.0203 59.0971   2
   3   2  11-8.47860 23.8308   5
   3   2  11 65.2699 63.1342   2
   3   2  12 366.327 119.473   2
   3   2  13 31.5206 61.0470   2
   3   2  14-45.1458 67.9114   2
   3   2  15 235.571 115.106   2
   3   3 -16 101.271 71.0499   4
   3   3 -16 88.6722 74.9151   3
   3   3 -15 806.125 155.362   4
   3   3 -15 630.834 134.478   3
   3   3 -14 394.303 110.645   4
   3   3 -14 321.338 96.6431   3
   3   3 -13 54.6955 50.7315   4
   3   3 -13 103.858 60.5096   3
   3   3 -12 2082.35 207.245   4
   3   3 -12 2088.19 218.241   3
   3   3 -11 60.6275 35.3034   5
   3   3 -11 51.3442 33.6803   2
   3   3 -11 38.6630 39.3847   4
   3   3 -11 39.1951 50.5325   3
   3   3 -10 7157.58 348.248   4
   3   3 -10 7302.14 286.701   2
   3   3 -10 7643.30 407.788   3
   3   3 -10 6715.58 302.406   5
   3   3  -9 8001.88 361.833   1
   3   3  -9 8920.29 379.931   4
   3   3  -9 8425.73 428.888   3
   3   3  -9 8333.56 303.272   2
   3   3  -9 8276.51 337.740   5
   3   3  -8 601.727 104.041   1
   3   3  -8 522.042 88.4460   5
   3   3  -8 686.557 108.104   4
   3   3  -8 604.697 80.9555   2
  -3  -3   8 595.247 87.9657   1
  -3  -3   7 1017.29 121.535   5
   3   3  -7 1187.65 105.401   2
   3   3  -7 1157.45 129.462   1
   3   3  -7 1024.88 123.289   4
  -3  -3   7 1105.95 113.979   1
   3   3  -7 1013.17 120.470   5
  -3  -3   6 3983.27 235.622   5
   3   3  -6 4174.30 233.260   1
   3   3  -6 4114.39 184.853   2
   3   3  -6 4511.55 250.370   5
   3   3  -5 4.10205 23.7210   5
  -3  -3   5-48.7097 40.1560   5
  -3  -3   5-3.29242 21.9562   4
  -3  -3   4 3527.54 199.123   4
  -3  -3   4 3112.15 208.645   5
   3   3  -4 3520.45 224.395   5
  -3  -3   3 5099.82 240.259   4
  -3  -3   3 4691.61 257.175   5
   3   3  -3 4948.55 263.998   5
   3   3  -2-9.70302 36.0301   5
  -3  -3   2 23.2197 23.0067   4
  -3  -3   2-31.0383 36.6515   1
   3   3  -1 379.904 74.8464   5
   3   3   0 21405.0 553.644   5
   3   3   1 17641.7 502.414   5
  -3  -3  -2 6992.60 312.888   5
   3   3   2 7163.70 322.066   2
   3   3   2 7455.63 329.007   5
   3   3   3 2380.44 189.632   5
   3   3   3 2842.64 217.312   2
  -3  -3  -3 2925.29 206.975   5
   3   3   4 14.3528 32.3499   5
   3   3   4 8.35377 50.0217   2
  -3  -3  -4-8.52780 37.9174   5
   3   3   5 1313.79 163.682   2
   3   3   5 1374.23 141.782   5
   3   3   6 170.809 55.6793   5
   3   3   6 455.557 118.011   2
   3   3   7 171.078 56.2993   5
   3   3   7 128.329 69.2801   2
   3   3   8 572.913 92.2991   5
   3   3   8 581.574 127.073   2
   3   3   9 175.485 52.2570   5
   3   3   9 194.770 90.1332   2
   3   3  10 2969.24 203.907   5
   3   3  10 3095.32 310.862   2
   3   3  11-24.7564 64.1321   2
   3   3  12-72.3650 69.5277   2
   3   3  13-38.4146 71.7252   2
   3   3  14-72.7519 81.3242   2
   3   4 -15 62.2719 54.0010   4
   3   4 -15 68.9364 43.8241   3
   3   4 -14 315.013 102.519   4
   3   4 -14 433.611 107.064   3
   3   4 -13 192.633 73.9735   4
   3   4 -13 314.499 100.356   3
   3   4 -12 280.764 90.5319   4
   3   4 -12 162.123 74.6212   3
   3   4 -11 514.115 95.7211   5
   3   4 -11 718.272 128.409   4
   3   4 -11 548.416 122.673   3
   3   4 -10 1996.56 168.539   2
   3   4 -10 2539.98 222.963   4
   3   4 -10 2408.69 236.490   3
   3   4 -10 2067.42 188.475   5
   3   4  -9 207.699 61.8743   1
  -3  -4   9 279.287 75.2852   5
   3   4  -9 242.460 70.5515   4
   3   4  -9 234.230 80.7807   3
   3   4  -9 244.515 58.0662   2
   3   4  -9 198.166 63.8950   5
   3   4  -8-13.8202 34.6269   1
   3   4  -8 12.7220 27.6272   5
  -3  -4   8 0.73769 37.0541   5
  -3  -4   8 31.9375 32.8594   1
   3   4  -8 2.21044 17.5184   2
   3   4  -7 3375.96 198.611   2
  -3  -4   7 3687.26 248.200   5
  -3  -4   7 3669.15 205.883   1
   3   4  -7 3565.15 245.909   5
  -3  -4   6 1657.92 167.536   5
   3   4  -6 1444.50 126.924   2
   3   4  -6 1593.30 164.396   5
   3   4  -5 78.7338 49.1247   5
  -3  -4   5 70.7557 48.7440   5
  -3  -4   5 131.076 44.4485   4
   3   4  -4 8651.47 377.156   5
  -3  -4   4 8624.74 341.943   4
  -3  -4   4 8545.46 372.937   5
  -3  -4   3 1725.21 154.837   4
   3   4  -3 1668.74 167.910   5
  -3  -4   3 1381.38 152.738   5
   3   4  -2 848.092 119.845   5
  -3  -4   2 923.251 115.628   4
  -3  -4   2 824.983 120.307   5
   3   4  -1 252.431 65.8523   5
  -3  -4   1 355.004 80.8301   5
   3   4   0-23.1641 30.2041   5
  -3  -4   0 36.9105 39.1099   5
   3   4   1 347.575 79.9551   5
  -3  -4  -1 547.752 102.877   5
   3   4   2 14698.3 496.883   5
  -3  -4  -2 15673.9 504.947   5
  -3  -4  -3 15159.7 502.390   5
   3   4   3 16875.2 561.310   2
   3   4   3 15657.0 513.411   5
  -3  -4  -4 1586.31 163.812   5
   3   4   4 1566.89 182.400   2
   3   4   4 1471.92 158.733   5
  -3  -4  -5 5165.78 293.338   5
   3   4   5 5743.59 356.442   2
   3   4   5 5127.87 296.083   5
  -3  -4  -6 8406.03 375.918   5
   3   4   6 8458.66 450.494   2
   3   4   6 7965.12 370.488   5
   3   4   7 949.581 129.776   5
   3   4   7 834.396 155.823   2
   3   4   8 390.749 87.9485   5
   3   4   8 398.065 113.598   2
   3   4   9 810.963 119.407   5
   3   4   9 1123.83 189.011   2
   3   4  10 13.2354 57.2731   2
   3   4  11 2053.98 273.277   2
   3   4  12 181.238 93.5827   2
   3   4  13 521.446 167.530   2
   3   5 -15 231.802 93.7008   3
   3   5 -14-43.1901 57.5739   4
   3   5 -14 0.79463 40.9119   3
   3   5 -13 83.5303 67.9166   4
   3   5 -13 159.742 81.9593   3
   3   5 -12 9.82029 43.6451   4
   3   5 -12 58.2812 58.2164   3
   3   5 -11 1545.08 195.130   4
   3   5 -11 1366.66 185.087   3
  -3  -5  10 118.413 60.1499   5
   3   5 -10 264.467 90.1002   3
  -3  -5   9 137.217 65.8815   5
   3   5  -9 116.044 65.5431   3
   3   5  -9 175.363 55.2894   2
  -3  -5   8 582.056 87.4422   1
  -3  -5   8 554.536 109.620   5
   3   5  -8 579.098 94.9277   2
   3   5  -7 671.170 100.923   2
  -3  -5   7 940.526 142.746   5
  -3  -5   7 903.731 104.686   1
   3   5  -6 2962.78 206.415   2
  -3  -5   6 3001.18 184.818   1
  -3  -5   6 2895.47 241.285   5
  -3  -5   5 2137.33 204.953   5
  -3  -5   4 279.018 83.4959   5
  -3  -5   3 1924.79 200.220   5
  -3  -5   2 4473.44 295.313   5
  -3  -5   1 2933.26 240.381   5
  -3  -5   0 11481.1 472.983   5
  -3  -5  -1 32.6611 46.8330   5
  -3  -5  -2 1345.63 165.833   5
  -3  -5  -3 391.112 95.0009   5
  -3  -5  -4 6741.71 362.563   5
   3   5   4 7566.84 422.776   2
   3   5   5 22.2748 65.0107   2
  -3  -5  -5-10.3746 57.6886   5
  -3  -5  -6 5770.32 336.199   5
   3   5   6 6007.06 405.664   2
   3   5   7 1444.58 215.220   2
  -3  -5  -7 1223.35 159.350   5
   3   5   8 49.3621 59.1039   2
   3   5   9 2074.07 272.669   2
   3   5  10-9.83347 71.3128   2
   3   5  11 322.416 112.503   2
   3   5  12 223.632 114.032   2
   3   6 -14 152.420 83.2402   3
   3   6 -13 1203.56 185.014   3
   3   6 -12 171.160 80.7258   3
  -3  -6  11-11.8733 56.3345   5
   3   6 -11-140.060 72.3964   3
  -3  -6  10 795.103 144.296   5
   3   6 -10 810.193 151.226   3
  -3  -6   9 375.810 101.244   5
   3   6  -9 363.507 100.257   3
   3   6  -8 1555.98 206.198   3
  -3  -6   8 1629.47 139.846   1
  -3  -6   8 1650.18 201.275   5
   3   6  -7 2641.57 217.052   2
  -3  -6   7 3265.74 192.258   1
  -3  -6   7 3164.75 274.065   5
   3   6  -6 273.211 76.4001   2
  -3  -6   6 582.675 123.849   5
  -3  -6   6 449.650 74.5844   1
  -3  -6   5-29.3076 37.1092   1
  -3  -6   5-114.510 65.1103   5
  -3  -6   4 606.335 128.435   5
  -3  -6   3 971.451 153.068   5
  -3  -6   2 1723.72 154.147   1
  -3  -6   2 1464.13 188.844   5
  -3  -6   1 257.684 70.3970   1
  -3  -6   1 229.812 87.6712   5
  -3  -6   0 503.605 113.764   5
  -3  -6  -1 249.039 84.4856   5
  -3  -6  -2 3978.81 303.020   5
  -3  -6  -3 4386.44 319.911   5
   3   6   4 560.025 135.096   2
  -3  -6  -4 829.180 141.356   5
   3   6   5 431.163 121.371   2
  -3  -6  -5 252.437 94.3880   5
   3   6   6 899.911 174.393   2
  -3  -6  -6 847.338 147.155   5
   3   6   7 651.536 154.037   2
  -3  -6  -7 559.376 117.452   5
   3   6   8 582.625 157.544   2
   3   6   9 1311.09 224.718   2
   3   6  10 50.8372 68.9139   2
   3   7 -13 97.3840 68.3532   3
   3   7 -12 759.989 153.371   3
  -3  -7  11 428.326 115.525   5
   3   7 -11 440.727 116.096   3
  -3  -7  10 473.217 120.121   5
   3   7 -10 283.686 95.5042   3
  -3  -7   9 1529.49 207.632   5
   3   7  -9 1443.09 195.491   3
  -3  -7   8 67.7104 60.0491   5
   3   7  -8-109.492 70.0145   3
  -3  -7   7 264.330 97.0240   5
  -3  -7   7 202.317 51.8914   1
  -3  -7   6 2090.67 150.610   1
  -3  -7   6 2086.75 240.047   5
  -3  -7   5 3.52013 46.2079   5
  -3  -7   5 9.72807 28.0083   1
  -3  -7   4 1178.19 182.419   5
  -3  -7   4 1175.27 118.065   1
  -3  -7   3 508.001 120.515   5
  -3  -7   3 674.293 96.6957   1
  -3  -7   2 97.9912 38.9840   1
  -3  -7   2 21.6440 59.8998   5
  -3  -7   1 595.842 97.6106   1
  -3  -7   1 417.299 119.195   5
  -3  -7   0 106.739 68.1587   5
  -3  -7  -1-41.6808 69.7422   5
  -3  -7  -2 821.085 155.753   5
  -3  -7  -3-13.1479 52.8309   5
   3   7   4 142.763 68.9905   2
  -3  -7  -4 146.356 77.7088   5
   3   7   5 191.201 100.537   2
  -3  -7  -5 71.7052 42.4582   5
   3   7   6 96.8963 73.0703   2
  -3  -7  -6 88.5908 63.5625   5
   3   7   7 77.4375 73.4993   2
  -3  -7  -7 51.3683 56.5839   5
   3   7   8-84.1735 86.5792   2
  -3  -7  -8 28.1212 49.7136   5
  -3  -8  12 59.1623 61.8684   5
  -3  -8  11 133.374 76.4817   5
  -3  -8  10 250.318 103.507   5
  -3  -8   9 438.308 128.588   5
  -3  -8   8 477.196 127.112   5
   3   8  -8 416.416 109.233   3
  -3  -8   7 128.588 75.3439   5
   3   8  -7-82.6635 74.2263   3
  -3  -8   6 778.077 160.000   5
  -3  -8   5-7.22077 48.8852   5
  -3  -8   4 240.406 112.330   5
  -3  -8   3 310.364 103.750   5
  -3  -8   2-7.57898 54.3180   5
  -3  -8   2 66.9995 37.5017   1
  -3  -8   1 55.3408 49.0615   1
  -3  -8   1 121.947 79.9011   5
  -3  -8   0 704.338 156.468   5
  -3  -8   0 853.669 121.857   1
  -3  -8  -1 140.897 81.7512   5
  -3  -8  -2 21.3246 50.1180   5
  -3  -8  -3 224.415 98.3380   5
   3   8   4 268.573 108.916   2
  -3  -8  -4 133.100 64.1678   5
   3   8   5 151.323 96.2916   2
  -3  -8  -5 158.877 83.4011   5
  -3  -8  -6 407.343 115.970   5
   3   8   6 321.030 121.340   2
  -3  -8  -7 717.270 149.539   5
  -3  -8  -8 64.0845 51.4426   5
  -3  -9   5 248.241 104.686   5
  -3  -9   4 457.371 139.129   5
  -3  -9   3 642.930 156.775   5
  -3  -9   2 847.999 175.722   5
  -3  -9   1 101.471 48.3942   5
  -3  -9   0 274.181 109.671   5
  -3  -9  -1 1467.51 226.169   5
  -3  -9  -2 1.01824 66.8107   5
   4 -11  -9 281.575 103.161   5
   4 -11  -8 302.848 103.347   5
   4 -11  -7 121.928 75.2406   5
   4 -11  -6-35.4015 67.1902   5
   4 -11  -5-10.3771 49.7063   5
   4 -11  -4 89.9728 56.0403   5
   4 -11  -3-55.7170 64.3122   5
   4 -11  -2 47.2256 63.2167   5
   4 -11  -1 355.995 111.793   5
   4 -11   0 64.6040 61.8384   5
   4 -11   1 1134.79 193.989   5
   4 -11   2 63.4046 64.9954   5
   4 -11   3 117.537 74.5364   5
   4 -11   4 154.626 94.3497   5
   4 -11   5 90.4367 69.9427   5
   4 -11   6-11.8035 50.2085   5
   4 -11   7 347.842 110.117   5
   4 -11   8 122.265 75.4903   5
   4 -11   9 16.8065 38.0269   5
   4 -11  10 468.312 130.589   5
   4 -11  11 407.724 131.728   5
   4 -10 -10 15.0490 42.3949   5
   4 -10  -9 31.5885 44.6148   5
   4 -10  -8-68.0981 52.8634   5
   4 -10  -7 127.149 68.1793   5
   4 -10  -6 1235.61 186.826   5
   4 -10  -5 421.170 116.979   5
   4 -10  -4 790.348 152.200   5
   4 -10  -3 1179.18 183.625   5
   4 -10  -2 856.202 155.503   5
   4 -10  -1 1939.89 237.151   5
   4 -10   0 665.059 140.216   5
   4 -10   1 507.129 124.779   5
   4 -10   2 620.070 138.668   5
   4 -10   3 5262.60 383.336   5
   4 -10   4 6699.95 431.724   5
   4 -10   5 165.939 91.8956   5
   4 -10   6 82.0315 72.9866   5
   4 -10   7 464.254 118.557   5
   4 -10   8 498.461 127.262   5
   4 -10   9 32.3086 55.2606   5
   4 -10  10 115.549 67.9497   5
   4 -10  11 17.5709 48.8265   5
  -4  10 -11-138.813 70.8828   4
   4 -10  12-90.9588 61.3491   5
  -4   9  12 132.601 93.2286   2
   4  -9 -10 40.6242 47.9729   5
   4  -9  -9 6.70387 41.1970   5
   4  -9  -8 257.233 82.5277   5
   4  -9  -7 87.6801 58.6529   5
   4  -9  -6 871.107 148.151   5
   4  -9  -5 789.393 145.632   5
   4  -9  -5 460.447 78.0404   1
   4  -9  -4 2610.07 171.693   1
   4  -9  -4 2917.91 263.151   5
   4  -9  -3 3418.47 178.687   1
   4  -9  -3 3827.59 220.502   4
   4  -9  -3 4173.55 315.278   5
   4  -9  -2 880.274 79.7728   1
   4  -9  -2 725.478 95.7538   4
   4  -9  -2 857.931 146.655   5
   4  -9  -1 660.031 127.275   5
   4  -9  -1 374.315 68.5884   4
   4  -9   0 1897.32 148.107   4
   4  -9   0 2179.08 230.349   5
   4  -9   1 693.827 134.072   5
   4  -9   2 62.4365 55.1395   5
   4  -9   3 675.700 137.600   5
   4  -9   4 2587.92 252.838   5
   4  -9   5 236.380 89.7825   5
   4  -9   6 4313.42 326.814   5
   4  -9   7 2663.51 260.104   5
   4  -9   8-21.4195 56.9593   5
  -4   9  -8-22.3330 48.3581   4
   4  -9   9-22.8765 55.2308   5
  -4   9  -9 53.6573 55.3536   4
   4  -9  10 231.556 85.8957   5
  -4   9 -10 241.673 81.9840   4
   4  -9  11 819.070 143.138   5
  -4   9 -11 986.006 163.551   4
   4  -9  12 36.7631 46.2896   5
  -4   9 -12 24.9356 44.6079   4
  -4   8  14-17.5372 51.0038   2
  -4   8  13 43.6951 58.7239   2
  -4   8  12 205.686 98.9479   2
   4  -8 -11 191.341 71.7982   5
   4  -8 -10 59.9122 47.6713   5
   4  -8  -9 443.511 95.4420   5
   4  -8  -8 1308.90 169.203   5
   4  -8  -7 206.685 76.1685   5
   4  -8  -6 753.394 104.520   1
   4  -8  -6 689.161 120.400   5
   4  -8  -5 365.013 90.8166   5
   4  -8  -5 252.780 58.5641   1
   4  -8  -4 2184.26 156.962   1
   4  -8  -4 2112.42 213.433   5
   4  -8  -3 685.598 83.3139   1
   4  -8  -3 471.934 105.751   5
   4  -8  -3 552.253 78.3333   4
   4  -8  -2-107.557 61.6224   5
   4  -8  -2-63.5243 27.4254   1
   4  -8  -2-61.0937 30.0415   4
   4  -8  -1 212.299 78.9982   5
   4  -8  -1 71.4743 28.5621   4
   4  -8   0 2915.09 164.542   4
   4  -8   0 2969.90 251.912   5
   4  -8   1 338.135 93.4575   5
   4  -8   2 576.341 116.213   5
   4  -8   3 1586.18 184.729   5
   4  -8   4-30.5766 55.6058   5
   4  -8   5 228.952 80.3034   5
   4  -8   6 327.817 94.5595   5
  -4   8  -6 299.598 78.1606   4
   4  -8   7 787.362 137.282   5
  -4   8  -7 514.073 33.9483   1
  -4   8  -7 863.596 127.309   4
   4  -8   8 312.677 88.3673   5
  -4   8  -8 465.160 98.9101   4
   4  -8   9 112.112 64.3267   5
  -4   8  -9 67.1827 49.1488   4
   4  -8  10-1.56691 44.7788   5
  -4   8 -10 47.7138 41.0344   4
   4  -8  11 545.215 111.716   5
  -4   8 -11 541.178 110.110   4
   4  -8  12 502.243 108.757   5
  -4   8 -12 383.175 101.267   4
  -4   8 -13-24.2501 43.1586   4
  -4   7  15 1286.83 216.482   2
  -4   7  14 101.707 73.8450   2
  -4   7  13 232.534 94.1017   2
  -4   7  12 1108.47 183.487   2
   4  -7 -11 251.758 69.2779   5
  -4   7  11 199.541 86.7122   2
   4  -7 -10 882.344 123.414   5
   4  -7  -9 343.420 82.6279   5
   4  -7  -8 296.815 79.0653   5
   4  -7  -7 47.2077 35.3798   1
   4  -7  -7-31.1309 53.4895   5
   4  -7  -6 5075.48 265.419   1
   4  -7  -6 5072.65 302.316   5
   4  -7  -5 193.751 54.9883   1
   4  -7  -5 139.950 70.4592   5
   4  -7  -4 6285.64 263.671   1
   4  -7  -4 6686.20 348.503   5
   4  -7  -3 67.2893 47.4091   5
   4  -7  -3 141.139 41.5476   1
   4  -7  -2 198.043 43.5700   1
   4  -7  -2 144.077 33.2632   4
   4  -7  -2 83.9942 63.3727   5
   4  -7  -1-59.8254 64.4193   5
   4  -7  -1-5.91886 14.3427   4
   4  -7   0 111.965 29.9413   4
   4  -7   0 117.309 65.6362   5
  -4   7  -1 1457.91 169.205   2
   4  -7   1 1251.37 159.073   5
   4  -7   2 1104.17 150.143   5
   4  -7   3 310.305 87.5370   5
   4  -7   3 350.220 40.8557   3
   4  -7   4 3909.12 273.957   5
  -4   7  -4 3827.70 214.194   4
  -4   7  -4 3391.75 87.8453   1
   4  -7   4 3377.46 145.945   3
  -4   7  -5 518.977 47.9554   1
  -4   7  -5 509.032 83.7479   4
   4  -7   5 485.864 65.2031   3
   4  -7   5 476.353 102.384   5
   4  -7   6 696.665 118.971   5
  -4   7  -6 846.385 108.482   4
   4  -7   6 754.514 92.5322   3
   4  -7   7 196.525 73.1049   5
  -4   7  -7 331.685 75.7550   4
   4  -7   7 287.134 64.7717   3
   4  -7   8 596.857 107.008   5
  -4   7  -8 687.488 106.337   4
   4  -7   8 878.259 116.223   3
  -4   7  -9 2033.42 187.912   4
   4  -7   9 2062.89 194.299   3
   4  -7   9 2069.92 197.512   5
   4  -7  10 201.310 72.7885   5
  -4   7 -10 207.446 68.4721   4
   4  -7  11-72.3069 46.8960   5
  -4   7 -11 78.9636 51.8556   4
   4  -7  12-10.9557 27.9273   5
  -4   7 -12 28.6172 42.5466   4
  -4   7 -13 351.358 96.0460   4
  -4   7 -14 114.229 62.3165   4
  -4   6  16 25.2753 53.2305   2
  -4   6  15-36.9513 62.4321   2
  -4   6  14 221.089 80.7796   2
  -4   6  13 17.2847 39.9864   2
   4  -6 -12 113.003 42.8564   5
  -4   6  12 105.058 66.8155   2
   4  -6 -11 267.691 65.2623   5
  -4   6  11 431.744 104.686   2
   4  -6 -10 720.377 101.751   5
   4  -6  -9 274.225 69.3193   5
   4  -6  -9 323.170 71.4745   3
   4  -6  -8 1118.50 115.793   3
   4  -6  -8 1217.12 138.271   5
   4  -6  -7 210.713 65.3671   5
   4  -6  -7 237.911 67.5724   1
   4  -6  -6 4902.06 258.031   1
   4  -6  -6 5328.86 291.115   5
   4  -6  -5 2408.36 171.447   1
   4  -6  -5 2498.30 137.230   3
   4  -6  -5 2526.81 206.701   5
   4  -6  -4 119.172 60.1023   5
   4  -6  -4 125.194 35.4246   3
   4  -6  -4 111.358 40.5646   1
   4  -6  -3 81.7988 36.6532   1
   4  -6  -3 93.7336 64.0503   5
   4  -6  -3 82.8846 23.3136   3
   4  -6  -2 4337.72 194.262   1
   4  -6  -2 4265.29 154.230   4
   4  -6  -2 4254.59 133.486   3
   4  -6  -2 4641.45 283.477   5
   4  -6  -1 2162.10 197.150   5
   4  -6  -1 2001.56 125.406   1
   4  -6  -1 2048.01 102.906   4
  -4   6   1 1975.49 104.847   1
  -4   6   0 933.555 66.5502   1
  -4   6  -1 5021.69 285.254   2
  -4   6  -1 4640.75 142.247   1
  -4   6  -2 1.75766 46.0211   2
   4  -6   2 6.15484 41.9229   5
  -4   6  -2 15.7874 15.0386   1
  -4   6  -3 2137.46 202.313   2
  -4   6  -3 2355.55 111.137   1
  -4   6  -3 2184.00 138.517   4
   4  -6   3 2391.31 109.082   3
   4  -6   3 2354.88 206.340   5
  -4   6  -4 4958.41 318.767   2
   4  -6   4 5327.16 185.674   3
   4  -6   4 5477.92 310.584   5
  -4   6  -5 2770.10 170.603   4
   4  -6   5 2752.83 148.521   3
   4  -6   5 2685.09 219.675   5
  -4   6  -6 2063.65 155.962   4
   4  -6   6 2005.17 141.801   3
   4  -6   6 1805.04 179.925   5
   4  -6   7 11.0124 45.3579   5
  -4   6  -7-7.81702 34.3432   4
   4  -6   7-3.70330 35.0198   3
   4  -6   8 8749.82 438.341   2
   4  -6   8 8132.27 337.362   3
   4  -6   8 8518.37 378.086   5
   4  -6   9 0.24174 35.5390   5
   4  -6   9 65.9013 54.6029   2
   4  -6   9 26.8624 39.3734   3
   4  -6  10 392.954 119.543   2
   4  -6  10 412.743 85.2910   5
   4  -6  11 1463.67 203.523   2
   4  -6  11 1602.59 160.908   5
   4  -6  12 115.972 84.7607   2
   4  -6  12 79.7042 47.3409   5
   4  -6  13 54.6116 61.3437   2
   4  -6  13-63.7923 34.1288   5
   4  -6  14 718.164 156.585   2
   4  -6  15 283.497 111.241   2
  -4   5  16 40.8481 59.5547   2
  -4   5  15 507.465 124.581   2
  -4   5  14 889.177 158.722   2
  -4   5  13 38.2026 47.2933   2
   4  -5 -12 336.561 61.9082   5
  -4   5  12 362.587 97.2487   2
   4  -5 -12 368.540 86.8277   3
  -4   5  11 1103.82 154.069   2
   4  -5 -11 1076.59 134.847   3
   4  -5 -11 1012.55 109.309   5
   4  -5 -10 207.667 58.3601   5
  -4   5  10 206.786 72.4950   2
   4  -5 -10 249.817 69.1867   3
   4  -5  -9 5987.97 286.951   3
   4  -5  -9 6188.40 281.295   5
   4  -5  -8 16603.2 453.833   3
   4  -5  -8 16757.4 479.065   5
   4  -5  -7 3993.94 239.636   1
   4  -5  -7 4230.66 247.358   5
   4  -5  -6 55534.0 852.313   1
   4  -5  -6 55546.5 910.545   5
   4  -5  -5 3491.43 205.105   1
   4  -5  -5 3583.63 240.134   5
   4  -5  -5 3617.88 185.404   3
   4  -5  -4 460.344 96.7053   5
   4  -5  -4 352.140 59.9463   3
   4  -5  -4 332.472 63.8764   1
   4  -5  -3 614.767 113.920   5
   4  -5  -3 683.799 84.2235   1
  -4   5   3 789.346 80.2502   1
   4  -5  -2 13217.3 344.599   1
   4  -5  -2 12325.8 200.918   4
  -4   5   2 13301.0 300.080   1
   4  -5  -1 1720.62 119.644   1
  -4   5   1 1761.61 108.181   1
  -4   5   0 44993.6 768.667   2
  -4   5   0 44399.7 518.136   1
  -4   5  -1 3732.09 229.625   2
  -4   5  -1 3684.47 153.780   1
  -4   5  -2 4546.45 265.878   2
  -4   5  -2 4672.76 178.537   1
  -4   5  -2 4583.32 162.742   4
  -4   5  -3 29751.4 710.851   2
  -4   5  -3 29568.0 442.130   4
   4  -5   3 28274.3 707.395   5
   4  -5   4 9514.41 409.120   5
  -4   5  -4 9697.35 426.092   2
  -4   5  -5 1097.64 152.270   2
   4  -5   5 1438.71 161.217   5
   4  -5   6 52.6016 45.1355   5
   4  -5   6 77.2123 49.6306   2
  -4   5  -6 166.369 70.1813   2
   4  -5   6 34.7000 26.2663   3
   4  -5   7 4029.14 281.087   2
   4  -5   7 4218.25 219.343   3
   4  -5   7 4110.27 258.748   5
   4  -5   8 65.1865 50.7319   2
   4  -5   8 10.6961 50.0874   5
   4  -5   8 122.627 45.4521   3
   4  -5   9 518.513 114.759   2
   4  -5   9 583.054 99.2043   5
   4  -5   9 635.558 102.272   3
   4  -5  10 1666.09 207.614   2
   4  -5  10 1827.78 162.510   5
   4  -5  11 3773.35 323.130   2
   4  -5  11 3893.31 227.743   5
   4  -5  12 1623.85 224.377   2
   4  -5  12 1474.91 136.947   5
   4  -5  13 1065.29 187.027   2
   4  -5  14 65.2332 69.5192   2
   4  -5  15 211.025 108.740   2
   4  -5  16 61.0123 80.1924   2
  -4   4  15-31.2971 43.2126   2
   4  -4 -14 112.092 51.6578   3
  -4   4  14 149.694 73.9672   2
   4  -4 -13 2195.92 211.219   3
  -4   4  13 2259.58 224.173   2
   4  -4 -12 213.092 44.9635   5
  -4   4  12 209.264 73.3869   2
   4  -4 -12 333.465 85.2000   3
   4  -4 -11 19.8932 24.7926   5
  -4   4  11 26.8523 44.7169   2
   4  -4 -11 88.3722 53.9786   3
  -4   4  10 33.3425 39.6316   2
   4  -4 -10 117.643 53.3072   3
   4  -4  -9 4775.10 269.822   3
   4  -4  -9 4984.19 248.150   5
   4  -4  -8 358.525 78.4120   5
   4  -4  -8 272.567 70.2975   1
   4  -4  -8 413.968 86.2252   3
   4  -4  -7 1268.22 140.857   5
   4  -4  -7 1120.31 125.026   3
   4  -4  -7 1409.10 141.647   1
   4  -4  -6 185.051 69.6652   5
   4  -4  -6 253.881 63.0036   1
   4  -4  -5 1035.83 112.540   1
   4  -4  -5 755.776 98.6580   3
  -4   4   5 958.214 102.680   1
   4  -4  -4 87909.9 979.940   1
  -4   4   4 87753.4 876.808   1
   4  -4  -3 17740.8 421.541   1
  -4   4   3 18369.6 385.064   1
   4  -4  -2 23570.5 468.810   1
  -4   4   2 22850.5 415.067   1
  -4   4   1 5606.09 242.080   2
  -4   4   1 5674.18 205.240   1
  -4   4   0 69.7678 37.1343   2
  -4   4   0 148.240 45.4003   1
  -4   4  -1 142.360 38.1852   1
  -4   4  -1 212.239 26.8993   4
  -4   4  -1 272.988 65.7470   2
  -4   4  -2-13.6787 44.8540   2
  -4   4  -3 5317.46 290.484   2
  -4   4  -4 2478.14 210.295   2
  -4   4  -5 4691.03 299.476   2
  -4   4  -6 35437.8 860.512   2
  -4   4  -7 2912.63 258.843   2
   4  -4   7 2178.71 210.524   2
   4  -4   7 2699.70 173.856   3
   4  -4   8 18554.4 628.326   2
   4  -4   8 19337.8 497.809   3
   4  -4   9 3326.50 281.245   2
   4  -4  10 173.625 85.4291   2
   4  -4  11-26.9398 58.8917   2
   4  -4  12 4951.81 385.797   2
   4  -4  13 453.980 141.387   2
   4  -4  14 2822.51 313.115   2
   4  -4  15 885.919 191.144   2
   4  -4  16 830.979 190.380   2
  -4   3  15 83.0730 57.6873   2
   4  -3 -15 260.795 78.9986   3
  -4   3  14 19.8560 53.6008   2
   4  -3 -14-64.4816 58.8997   3
   4  -3 -13 243.980 81.2585   3
  -4   3  13 368.401 86.8087   2
  -4   3  12 860.529 125.741   2
   4  -3 -12 1042.77 142.702   3
   4  -3 -12 946.481 82.2508   5
   4  -3 -11 792.880 126.119   3
   4  -3 -11 844.007 90.2483   5
   4  -3 -10 23921.5 638.296   3
   4  -3 -10 23376.3 520.477   5
   4  -3  -9 160.277 56.5033   5
  -4   3   9 209.961 55.8350   2
   4  -3  -9 169.276 62.9412   3
   4  -3  -8 1604.90 159.039   3
   4  -3  -8 1633.70 158.688   1
  -4   3   8 1501.71 125.212   2
   4  -3  -7 3996.07 235.633   1
   4  -3  -7 3537.28 232.566   3
   4  -3  -6 2420.12 177.337   1
  -4   3   6 1954.34 147.598   1
   4  -3  -5 2134.53 161.127   1
  -4   3   5 2074.32 147.308   1
   4  -3  -4 49642.2 744.908   1
  -4   3   4 49403.9 673.727   1
   4  -3  -3 11.3944 26.3408   1
  -4   3   3-34.3554 47.0991   1
  -4   3   2 6328.41 220.796   2
   4  -3  -2 7008.30 261.216   1
  -4   3   2 6973.46 245.316   1
  -4   3   1 83933.8 865.246   2
  -4   3   1 85452.8 851.800   1
  -4   3   0 281.773 54.3655   1
  -4   3   0 213.552 52.4270   2
   4  -3   1 1296.52 114.564   2
  -4   3  -1 1240.72 121.733   2
  -4   3  -2 1670.02 149.700   2
   4  -3   2 1669.42 140.459   2
  -4   3  -3 9694.18 375.944   2
  -4   3  -4 3718.22 247.255   2
  -4   3  -5 134.657 50.9064   2
  -4   3  -6 3363.76 255.290   2
  -4   3  -7 579.651 113.235   2
   4  -3   7 532.894 114.396   2
   4  -3   8 124.155 83.3748   2
   4  -3   9 14038.5 576.320   2
   4  -3  10-18.3304 35.4840   5
   4  -3  10 3.41516 71.7225   2
   4  -3  11 5976.65 412.432   2
   4  -3  11 6038.15 262.375   5
   4  -3  12 52.8193 31.0638   5
   4  -3  12 76.8811 64.7398   2
   4  -3  13 23.2393 74.6972   2
   4  -3  14 466.391 139.631   2
   4  -3  15 180.436 109.930   2
   4  -3  16-110.233 87.9412   2
   4  -2 -16 93.2042 54.2119   3
  -4   2  15 111.948 61.7892   2
   4  -2 -15 121.460 67.6166   3
  -4   2  14-19.6560 34.4073   2
   4  -2 -14 31.2124 55.3868   3
   4  -2 -13 1301.29 170.708   3
   4  -2 -12 472.755 62.9501   5
   4  -2 -12 477.512 107.032   3
   4  -2 -12 562.139 65.7304   5
   4  -2 -11 2514.26 147.389   5
   4  -2 -11 2003.71 198.841   3
  -4   2  11 2261.26 176.587   2
   4  -2 -10 2551.42 219.234   3
  -4   2  10 2756.04 177.500   2
   4  -2  -9 1295.15 155.893   3
  -4   2   9 1235.10 110.061   2
   4  -2  -8 240.205 69.5633   1
  -4   2   8 156.739 37.5102   2
   4  -2  -8 96.1050 44.1900   3
  -4   2   7 288.848 45.2583   2
   4  -2  -7 230.374 64.4723   1
   4  -2  -6 305.116 67.6912   1
   4  -2  -5 41.3537 30.1408   1
  -4   2   4 8113.37 191.897   2
   4  -2  -4 8145.06 304.463   1
   4  -2  -4 8392.27 171.008   4
   4  -2  -3 174.890 48.1165   1
  -4   2   3 107.480 28.3352   2
  -4   2   2 492.621 58.1355   2
   4  -2  -2 453.145 71.0784   1
  -4   2   1 2282.41 134.173   2
   4  -2  -1 2311.04 120.802   2
  -4   2   1 2331.08 152.302   1
   4  -2   0 8435.01 259.491   2
  -4   2   0 8458.68 290.480   1
  -4   2   0 8841.58 278.238   2
  -4   2  -1 225.081 54.9269   2
   4  -2   1 152.668 48.4698   2
   4  -2   2 20589.1 484.370   2
  -4   2  -2 20868.5 499.718   2
  -4   2  -3 3294.34 210.985   2
   4  -2   3 3311.84 211.548   2
  -4   2  -4 42901.2 800.094   2
  -4   2  -5 657.183 105.750   2
  -4   2  -6 1523.55 167.314   2
  -4   2  -7 1402.02 169.607   2
   4  -2   8 1323.96 175.549   2
   4  -2   9 7453.11 430.245   2
   4  -2  10 14820.7 625.864   2
   4  -2  11 4237.06 197.682   5
   4  -2  11 4203.22 349.808   2
   4  -2  11 3615.77 216.205   5
   4  -2  12 7509.22 488.709   2
   4  -2  12 7651.98 272.100   5
   4  -2  13 1822.13 253.342   2
   4  -2  14 874.082 184.454   2
   4  -2  15 174.717 109.228   2
   4  -2  16 164.850 94.5271   2
   4  -1 -16 180.162 92.8459   3
   4  -1 -15 1304.05 188.191   3
   4  -1 -14 555.991 119.844   3
   4  -1 -13 1011.77 157.086   3
  -4   1  12 6424.37 282.155   2
   4  -1 -12 6618.56 227.374   5
   4  -1 -12 6429.62 372.411   3
  -4   1  11 891.639 98.1041   2
   4  -1 -11 1065.96 98.6297   5
   4  -1 -11 1029.13 146.759   3
   4  -1 -10 551.128 75.5457   5
  -4   1  10 526.973 69.9075   2
   4  -1 -10 463.273 104.979   3
   4  -1  -9 663.949 81.6682   5
  -4   1   9 598.233 66.9260   2
   4  -1  -9 695.945 118.127   3
  -4   1   8 7002.50 185.004   2
   4  -1  -8 7224.33 336.801   1
  -4   1   8 7481.51 313.127   1
  -4   1   7 15680.8 215.920   2
   4  -1  -7 16310.9 353.333   4
   4  -1  -7 16856.7 496.973   1
   4  -1  -6 15457.8 322.232   4
   4  -1  -6 16262.0 463.925   1
   4  -1  -5 823.340 104.303   1
   4  -1  -5 832.454 70.8260   4
   4  -1  -4 14033.1 407.627   1
   4  -1  -4 14217.4 277.169   4
  -4   1   3 21946.5 246.925   2
   4  -1  -3 21896.4 498.246   1
   4  -1  -2 12.7015 17.2122   2
  -4   1   2 28.5341 17.8282   2
  -4   1   2 0.23605 14.3375   4
  -4   1   1 261.665 43.9601   2
   4  -1  -1 219.550 41.0113   2
   4  -1   0 13456.6 331.488   2
  -4   1   0 12879.9 320.017   2
  -4   1  -1 443.390 67.3329   2
   4  -1   1 500.892 77.6327   2
   4  -1   2 54359.3 795.106   2
  -4   1  -2 53375.2 767.545   2
   4  -1   3 48005.5 799.276   2
  -4   1  -3 47719.0 778.844   2
  -4   1  -4 28849.5 635.393   2
  -4   1  -5 84.2589 46.8240   2
  -4   1  -6 613.421 106.786   2
   4  -1   7 4028.03 291.315   2
  -4   1  -7 4432.21 293.607   2
   4  -1   8 14.3388 70.2592   2
   4  -1   9 28.1128 28.3204   5
   4  -1   9-79.1793 92.8460   2
   4  -1  10 13023.4 598.494   2
   4  -1  10 12926.9 361.928   5
   4  -1  11 2629.52 289.367   2
   4  -1  11 2487.62 153.427   5
   4  -1  12 5205.35 409.443   2
   4  -1  13-8.74737 63.2707   2
   4  -1  14 696.856 177.306   2
   4  -1  15 16.7920 69.9831   2
   4   0 -17 81.5383 71.2396   4
   4   0 -16 211.370 89.5195   3
   4   0 -15 4908.54 352.861   3
   4   0 -14 3345.24 289.558   3
  -4   0  13 943.544 98.5239   2
   4   0 -13 935.945 154.038   3
  -4   0  12 4302.29 188.593   2
   4   0 -12 4464.78 273.261   4
   4   0 -12 4766.78 325.854   3
   4   0 -12 4169.73 194.665   5
  -4   0  11 5988.44 197.829   2
   4   0 -11 6555.77 312.005   4
   4   0 -11 6270.02 369.611   3
   4   0 -11 6159.47 252.100   5
  -4   0  10 427.371 47.0020   2
   4   0 -10 372.825 64.3864   5
   4   0 -10 384.111 77.7161   4
   4   0 -10 319.834 89.1496   3
  -4   0   9 6.84320 39.8189   1
   4   0  -9 52.9045 32.2232   5
   4   0  -9 14.5891 29.5544   4
   4   0  -9 28.3671 59.3705   3
   4   0  -8 937.983 99.9924   4
   4   0  -8 989.507 127.787   1
   4   0  -8 989.679 104.362   5
  -4   0   8 1041.82 121.011   1
   4   0  -7 23984.1 600.269   1
   4   0  -7 22942.0 462.088   4
  -4   0   7 22707.8 526.728   1
   4   0  -6 4258.81 213.541   5
   4   0  -6 4667.12 254.599   1
   4   0  -6 4574.84 198.210   4
  -4   0   6 4525.75 231.391   1
   4   0  -5 25934.1 522.293   5
   4   0  -5 25533.3 590.782   1
   4   0  -5 26699.2 463.550   4
   4   0  -4 58.9832 32.8377   5
   4   0  -4 94.3721 44.0328   1
  -4   0   3 357.997 47.8649   4
   4   0  -3 344.101 31.8943   2
   4   0  -2 1536.82 90.9399   2
  -4   0   2 1593.79 103.711   4
   4   0  -1 894.237 79.7434   2
  -4   0   1 916.604 74.0764   2
   4   0   0 7829.00 258.049   2
  -4   0   0 7905.37 239.281   2
  -4   0  -1 1938.17 132.737   2
   4   0   1 2239.34 150.744   2
  -4   0  -2 20995.5 471.293   2
   4   0   2 21564.7 499.621   2
  -4   0  -3 62.6433 34.7638   2
   4   0   3 70.7120 53.2976   2
  -4   0  -4 78.6591 46.9861   2
   4   0   4 121.258 45.9532   5
   4   0   4 34.8112 48.0428   2
  -4   0  -5 7069.58 330.613   2
   4   0   5 6646.28 277.504   5
   4   0   5 6571.01 336.666   2
   4   0   6 12609.7 382.696   5
  -4   0  -6 13292.9 480.538   2
   4   0   6 12542.9 488.325   2
  -4   0  -7 75.0082 48.2378   2
   4   0   7 114.808 45.8122   5
   4   0   7 90.6813 62.6456   2
   4   0   8 15135.0 590.508   2
   4   0   8 14484.0 411.090   5
   4   0   9 134.870 43.4969   5
   4   0   9 29.3156 67.8770   2
   4   0  10-24.0994 29.6534   5
   4   0  10-102.967 67.1218   2
   4   0  11 3224.15 319.704   2
   4   0  11 3131.03 182.535   5
   4   0  12-56.5209 75.4337   2
   4   0  13 456.085 141.548   2
   4   0  14 436.218 142.993   2
   4   0  15 137.432 98.7347   2
   4   1 -17 523.965 139.206   4
   4   1 -16 271.827 96.4917   4
   4   1 -16 238.089 90.1378   3
   4   1 -15 722.443 140.491   4
   4   1 -15 717.632 140.978   3
   4   1 -14-31.9397 33.5329   4
   4   1 -14-69.3225 68.7166   3
   4   1 -13 3.52958 52.8160   4
   4   1 -13 110.033 90.6034   3
   4   1 -12 12015.1 461.861   4
   4   1 -12 11119.2 515.265   3
   4   1 -12 10483.0 338.510   5
   4   1 -11 2840.98 213.404   4
   4   1 -11 2236.41 231.979   3
   4   1 -11 2366.46 167.505   5
   4   1 -10 1602.37 154.357   4
   4   1 -10 1800.24 207.716   3
   4   1 -10 1623.69 143.100   5
   4   1  -9 1655.84 150.252   4
  -4  -1   9 1525.06 153.092   1
   4   1  -9 1496.63 139.642   5
   4   1  -8 4488.22 273.052   1
   4   1  -8 4359.63 229.658   4
  -4  -1   8 4397.98 243.925   1
   4   1  -8 4288.08 233.888   5
   4   1  -7 995.253 126.309   1
   4   1  -7 1100.62 114.192   4
  -4  -1   7 1354.10 133.636   1
   4   1  -7 1021.46 113.350   5
   4   1  -6 1482.87 149.354   1
   4   1  -6 1441.57 128.856   4
  -4  -1   6 1432.60 135.722   1
   4   1  -6 1481.49 137.417   5
   4   1  -5 1076.07 124.084   1
  -4  -1   5 1114.23 117.227   1
   4   1  -5 1080.75 116.758   5
  -4  -1   4 12182.5 317.930   4
   4   1  -4 12853.0 190.250   2
   4   1  -4 12347.9 390.798   5
   4   1  -3 10558.4 361.136   5
  -4  -1   3 10510.7 298.042   4
   4   1  -3 10935.3 222.664   2
  -4  -1   2 1723.94 125.505   4
   4   1  -2 1697.29 104.652   2
   4   1  -2 1830.56 150.452   5
   4   1  -1 15699.5 349.582   2
   4   1  -1 15340.9 437.914   5
   4   1   0 71.5752 34.5609   5
   4   1   0 64.1171 33.4671   2
   4   1   1 1398.27 134.642   5
   4   1   1 1151.04 116.366   2
   4   1   2 9998.96 356.802   2
   4   1   2 10085.9 360.612   5
   4   1   3 2476.93 191.802   2
   4   1   3 2635.00 185.676   5
   4   1   4 1964.30 179.244   2
   4   1   4 2074.66 166.103   5
   4   1   5 235.736 61.1837   5
   4   1   5 233.957 76.3268   2
   4   1   6 2592.80 230.133   2
   4   1   6 2521.06 184.422   5
   4   1   7 5591.83 354.403   2
   4   1   7 6003.28 286.272   5
   4   1   8 7709.50 322.001   5
   4   1   8 7387.70 423.781   2
   4   1   9 218.004 59.0201   5
   4   1   9 256.737 102.667   2
   4   1  10 1927.12 157.702   5
   4   1  10 2324.61 266.323   2
   4   1  11-52.0139 30.1441   5
   4   1  11 9.36584 61.1235   2
   4   1  12 393.567 130.508   2
   4   1  13 5.03675 56.1931   2
   4   1  14 373.219 130.276   2
   4   2 -16 437.443 131.204   4
   4   2 -15 2416.50 254.689   4
   4   2 -15 2312.39 259.020   3
   4   2 -14 148.798 73.5696   4
   4   2 -14 120.266 85.5105   3
   4   2 -13 39.4458 47.8273   4
   4   2 -13-88.9582 74.1656   3
   4   2 -12 295.785 79.9266   4
   4   2 -12 238.578 94.5061   3
   4   2 -11 4499.25 286.216   4
   4   2 -11 4432.52 333.679   3
   4   2 -11 4328.49 247.315   5
   4   2 -10 1336.05 152.049   4
   4   2 -10 1406.07 193.948   3
   4   2 -10 1384.06 79.5737   2
   4   2 -10 1316.87 139.021   5
   4   2  -9 20868.9 565.929   4
  -4  -2   9 20616.5 549.114   1
   4   2  -9 19865.4 278.337   2
   4   2  -9 19344.3 532.056   5
   4   2  -8 5467.58 312.217   1
   4   2  -8 5367.88 282.185   4
  -4  -2   8 5539.97 273.220   1
   4   2  -8 5394.95 141.246   2
   4   2  -8 5346.31 282.418   5
   4   2  -7 5182.02 146.860   2
   4   2  -7 5295.69 293.543   1
   4   2  -7 5372.29 275.998   4
  -4  -2   7 4729.41 250.750   1
   4   2  -7 5081.92 276.492   5
   4   2  -6 494.442 48.7030   2
   4   2  -6 514.959 88.8574   5
  -4  -2   6 569.242 86.9709   1
   4   2  -6 554.261 97.4735   1
   4   2  -5 2232.19 101.993   2
  -4  -2   5 2216.15 153.039   4
  -4  -2   5 2055.99 160.523   1
   4   2  -5 1932.78 169.486   5
  -4  -2   4 1004.40 103.000   4
   4   2  -4 989.432 122.064   5
  -4  -2   3 1743.71 138.492   4
   4   2  -3 1843.28 114.255   2
   4   2  -3 1852.93 165.247   5
   4   2  -2 355.662 56.2317   2
   4   2  -2 357.980 75.5398   5
   4   2  -1 772.029 108.939   5
   4   2  -1 644.529 81.8950   2
   4   2   0 1189.91 116.025   2
   4   2   0 1116.28 130.103   5
   4   2   1 6716.45 291.076   2
   4   2   1 6536.02 313.930   5
   4   2   2 2977.47 208.551   2
   4   2   2 2915.90 211.867   5
   4   2   3 1118.69 132.816   5
   4   2   3 976.841 130.568   2
   4   2   4 23748.0 654.006   2
   4   2   4 24700.4 618.596   5
   4   2   5 77.2183 44.3179   5
   4   2   5 102.583 62.6999   2
   4   2   6 13468.0 542.165   2
   4   2   6 13811.2 467.143   5
   4   2   7 1391.75 188.281   2
   4   2   7 1481.85 154.136   5
   4   2   8 146.013 52.5143   5
   4   2   8 150.205 81.8683   2
   4   2   9 843.901 115.101   5
   4   2   9 823.773 156.183   2
   4   2  10 2286.26 184.725   5
   4   2  10 2591.10 289.879   2
   4   2  11 725.168 163.735   2
   4   2  12 1772.84 261.716   2
   4   2  13 79.6903 83.3288   2
   4   2  14 188.814 98.3986   2
   4   3 -15 84.1073 52.8215   4
   4   3 -15 208.834 89.0477   3
   4   3 -14 840.285 153.063   4
   4   3 -14 891.703 159.778   3
   4   3 -13 195.413 71.7894   4
   4   3 -13 223.055 98.4265   3
   4   3 -12 647.604 124.962   4
   4   3 -12 492.233 119.764   3
   4   3 -11 649.836 107.120   5
   4   3 -11 691.635 122.076   4
   4   3 -11 927.551 161.662   3
   4   3 -10 54.6583 42.9484   5
   4   3 -10 28.2521 18.5201   2
   4   3  -9 206.686 65.1612   5
   4   3  -9 298.585 51.3926   2
   4   3  -9 163.623 54.9247   4
  -4  -3   9 164.095 55.1689   1
   4   3  -8 3137.60 157.593   2
   4   3  -8 2973.66 232.355   1
  -4  -3   8 2914.38 201.999   1
   4   3  -8 3154.14 233.257   5
   4   3  -7 2768.02 150.168   2
  -4  -3   7 2703.11 193.064   1
   4   3  -7 2810.15 219.860   5
   4   3  -6 3833.19 168.833   2
  -4  -3   6 3664.98 217.886   1
   4   3  -6 3500.91 246.876   5
  -4  -3   5 3003.61 196.851   4
  -4  -3   5 2907.15 196.172   1
   4   3  -5 3204.86 233.819   5
   4   3  -4-9.76666 30.8075   5
  -4  -3   4 6.51987 28.9109   4
  -4  -3   4-61.1215 55.5474   1
  -4  -3   3 24361.0 584.750   1
  -4  -3   3 25769.0 588.588   4
   4   3  -3 25294.3 660.484   5
   4   3  -2 147.023 55.9706   5
  -4  -3   2 145.064 53.7497   4
  -4  -3   2 21.2119 41.8501   1
   4   3  -1 3441.87 207.274   2
   4   3  -1 3418.79 244.791   5
   4   3   0 15353.8 458.046   2
   4   3   0 14936.6 509.908   5
   4   3   1 2922.19 212.878   2
   4   3   1 2957.60 229.045   5
   4   3   2 36.1030 43.2810   5
   4   3   2 173.171 65.7722   2
   4   3   3 6676.08 353.071   2
   4   3   3 6153.81 332.494   5
   4   3   4 3808.74 261.243   5
   4   3   4 3662.35 277.855   2
   4   3   5 11404.8 506.452   2
   4   3   5 10767.2 439.059   5
   4   3   6 19122.5 684.662   2
   4   3   6 18499.6 573.011   5
   4   3   7 1830.95 224.425   2
   4   3   7 1623.90 169.450   5
   4   3   8 9.19602 39.2974   5
   4   3   8 2.94625 61.7615   2
   4   3   9 2452.47 207.232   5
   4   3   9 2347.09 275.681   2
   4   3  10 59.2995 58.3489   2
   4   3  11 926.152 189.896   2
   4   3  12 1101.61 217.679   2
   4   3  13 16.4448 55.7211   2
   4   4 -15 91.0136 64.7999   3
   4   4 -14-74.3870 57.0955   4
   4   4 -14-2.19660 37.6034   3
   4   4 -13 1634.21 207.951   4
   4   4 -13 1855.08 233.538   3
   4   4 -12 63.7100 57.0831   4
   4   4 -12 28.0624 56.3725   3
   4   4 -11 1398.44 206.946   3
   4   4 -10 527.314 132.226   3
  -4  -4   9 6452.77 309.462   1
  -4  -4   8 68.9884 46.1306   1
   4   4  -8 22.4122 23.0554   2
   4   4  -7 3247.03 186.889   2
  -4  -4   7 3421.82 219.436   1
   4   4  -6 335.820 60.7370   2
  -4  -4   6 304.678 70.6264   1
  -4  -4   6 214.289 77.2049   5
  -4  -4   5 1795.66 188.317   5
  -4  -4   5 1711.17 155.965   1
  -4  -4   4 508.253 101.880   5
  -4  -4   4 576.318 98.1183   1
  -4  -4   3 269.548 80.0854   5
  -4  -4   3 345.397 78.5828   1
  -4  -4   2 0.22688 46.0179   1
  -4  -4   2-29.6164 51.2296   5
  -4  -4   1 8982.01 412.862   5
  -4  -4   1 9176.71 383.592   1
  -4  -4   0 23382.0 664.208   5
  -4  -4  -1 9307.52 421.473   5
   4   4   1 9982.97 428.928   2
  -4  -4  -2 12632.2 490.989   5
   4   4   2 13589.1 516.984   2
   4   4   3 127.635 68.4753   2
   4   4   4 2028.77 223.324   2
   4   4   5 1083.18 170.198   2
   4   4   6-11.6537 60.4932   2
   4   4   7 206.729 87.5770   2
   4   4   8 403.725 129.659   2
   4   4   9 1086.18 205.754   2
   4   4  10 551.178 149.401   2
   4   4  11 82.3192 68.6956   2
   4   4  12-6.35198 57.2008   2
   4   5 -14 715.675 159.268   3
   4   5 -13-89.5210 70.5565   3
   4   5 -12 582.630 139.325   3
   4   5 -11 24.5992 63.0387   3
   4   5 -10 1211.84 192.660   3
  -4  -5   9 280.525 68.4539   1
  -4  -5   8-20.1824 34.1583   1
  -4  -5   7 5263.84 343.033   5
   4   5  -7 4781.93 253.723   2
  -4  -5   7 4836.85 261.241   1
   4   5  -6 758.468 104.930   2
  -4  -5   6 771.962 138.018   5
  -4  -5   6 802.142 106.663   1
  -4  -5   5 76.1249 55.7292   5
  -4  -5   5-85.7272 45.7155   1
  -4  -5   4 11408.7 500.025   5
  -4  -5   4 11250.9 411.863   1
  -4  -5   3 22.9160 51.8842   5
  -4  -5   3-40.4795 53.6356   1
  -4  -5   2-72.9883 47.6961   1
  -4  -5   2-18.3558 39.6269   5
  -4  -5   1 2606.01 242.958   5
  -4  -5   1 2625.52 212.572   1
  -4  -5   0 568.912 126.061   5
  -4  -5  -1 1284.62 171.993   5
   4   5   1 1023.42 153.717   2
  -4  -5  -2 14150.1 558.030   5
   4   5   2 15035.1 595.562   2
  -4  -5  -3 5773.87 358.141   5
   4   5   3 6219.24 394.075   2
   4   5   4 24.1558 52.9593   2
  -4  -5  -4 39.1038 57.6340   5
   4   5   5 1283.82 197.079   2
   4   5   6 900.459 177.859   2
   4   5   7 480.342 139.325   2
   4   5   8 933.490 187.332   2
   4   5   9 923.955 192.823   2
   4   5  10 729.116 179.252   2
   4   6 -13 138.818 76.3708   3
   4   6 -12 1402.20 220.090   3
   4   6 -11 109.420 73.8347   3
   4   6 -10-91.5692 68.9407   3
   4   6  -9 889.030 177.309   3
  -4  -6   9 877.882 117.299   1
  -4  -6   8 487.324 115.557   5
  -4  -6   8 494.140 86.9077   1
  -4  -6   7 21.1835 34.0685   1
  -4  -6   7 9.90305 60.5536   5
  -4  -6   6-24.5769 53.3150   5
  -4  -6   6-13.0647 35.7877   1
  -4  -6   5 952.182 161.390   5
  -4  -6   5 1105.16 127.954   1
  -4  -6   4 275.141 94.6116   5
  -4  -6   4 458.882 86.1192   1
  -4  -6   3 922.977 159.182   5
  -4  -6   3 909.330 123.370   1
  -4  -6   2 98.7363 61.3881   5
  -4  -6   2 126.457 55.2989   1
  -4  -6   1 8.70325 37.4748   1
  -4  -6   1 70.0041 49.6829   5
  -4  -6   0-98.4027 66.2587   5
  -4  -6  -1 1418.07 194.876   5
   4   6   2 52.6342 52.6168   2
  -4  -6  -2-32.7832 39.4990   5
   4   6   3 64.4547 72.9353   2
  -4  -6  -3 13.8173 45.5147   5
   4   6   4-39.9211 53.2255   2
  -4  -6  -4-134.139 74.0608   5
   4   6   5 638.588 154.534   2
  -4  -6  -5 664.254 133.967   5
   4   6   6 43.7553 68.2608   2
   4   6   7 17.1622 58.8438   2
   4   6   8-103.600 92.4438   2
   4   6   9-107.776 81.7862   2
   4   7 -12-25.0611 59.6171   3
   4   7 -11-106.534 71.4331   3
   4   7 -10 1493.25 224.931   3
  -4  -7   9 1084.13 183.506   5
   4   7  -9 1219.55 205.450   3
  -4  -7   8 504.501 130.241   5
  -4  -7   7 4.36508 67.3003   5
  -4  -7   7 43.5935 34.1358   1
  -4  -7   6 638.741 144.972   5
  -4  -7   6 730.638 102.687   1
  -4  -7   5 219.608 60.4780   1
  -4  -7   5 338.455 113.561   5
  -4  -7   4 237.743 91.1808   5
  -4  -7   4 126.640 48.1987   1
  -4  -7   3 298.485 97.1162   5
  -4  -7   3 258.534 70.3119   1
  -4  -7   2 1104.89 186.106   5
  -4  -7   2 1007.35 135.603   1
  -4  -7   1 2011.70 197.529   1
  -4  -7   1 2089.71 250.485   5
  -4  -7   0 4117.34 349.329   5
  -4  -7   0 4185.70 287.814   1
  -4  -7  -1 797.457 156.751   5
   4   7   2 873.192 170.507   2
  -4  -7  -2 1064.56 179.503   5
   4   7   3 281.667 100.207   2
  -4  -7  -3 417.297 117.494   5
   4   7   4 141.507 83.1571   2
  -4  -7  -4 60.5676 38.4797   5
   4   7   5 1714.25 253.722   2
  -4  -7  -5 1050.84 181.624   5
   4   7   6 824.155 183.195   2
   4   7   7 177.583 105.274   2
  -4  -8   9 485.566 142.852   5
  -4  -8   8 411.859 118.322   5
  -4  -8   7 1085.38 192.623   5
  -4  -8   6 114.775 85.9848   5
  -4  -8   5 452.535 126.237   5
  -4  -8   4 665.357 159.315   5
  -4  -8   3 112.250 76.9861   5
  -4  -8   2 102.679 71.4462   5
  -4  -8   1 1074.85 201.000   5
  -4  -8   0 62.3477 44.8254   1
  -4  -8   0 33.0851 81.6915   5
  -4  -8  -1 1074.32 188.203   5
  -4  -8  -1 1049.42 159.657   1
   4   8   2 66.5350 82.5750   2
  -4  -8  -2 98.2357 57.5227   5
   4   8   3 279.942 105.624   2
  -4  -8  -3 410.384 117.057   5
   4   8   4 435.473 143.993   2
  -4  -8  -4 739.059 154.684   5
  -4  -8  -5 313.637 106.127   5
   4   9   1-83.3457 68.9530   2
   5 -11  -9 96.0995 64.1504   5
   5 -11  -8 191.534 81.6672   5
   5 -11  -7 170.546 88.0833   5
   5 -11  -6 271.561 104.571   5
   5 -11  -5 12.0985 66.0143   5
   5 -11  -4 348.510 112.969   5
   5 -11  -3 498.772 132.718   5
   5 -11  -2 3.58731 36.1248   5
   5 -11  -1 712.819 152.085   5
   5 -11   0-28.0590 54.6423   5
   5 -11   1 179.515 89.7813   5
   5 -11   2 3156.03 315.250   5
   5 -11   3 216.227 100.808   5
   5 -11   4 1075.08 192.183   5
   5 -11   5 93.7237 74.0151   5
   5 -11   6-87.1806 79.3070   5
   5 -11   7 41.7106 56.3462   5
   5 -11   8-27.7091 56.5067   5
   5 -11   9 187.420 87.6543   5
   5 -11  10 76.5829 69.6055   5
   5 -11  11 305.110 109.295   5
   5 -10 -10 51.6216 47.9534   5
   5 -10  -9 131.803 75.3329   5
   5 -10  -8 135.993 74.3207   5
   5 -10  -7 81.3402 63.2301   5
   5 -10  -6-77.3453 74.8684   5
   5 -10  -5 697.762 147.385   5
   5 -10  -4 52.8084 67.5599   5
   5 -10  -3-13.6177 68.5530   5
   5 -10  -2 70.9046 62.5517   5
   5 -10  -1 102.102 62.6558   5
   5 -10   0 810.425 156.668   5
   5 -10   1-12.5443 63.7681   5
   5 -10   2 295.472 109.830   5
   5 -10   3 79.6805 65.2285   5
   5 -10   4 3662.98 324.239   5
   5 -10   5 4363.19 357.987   5
   5 -10   6 271.775 101.619   5
   5 -10   7-19.4798 49.9837   5
   5 -10   8 90.4869 67.1159   5
   5 -10   9-46.6269 63.1928   5
   5 -10  10-13.9424 44.0572   5
  -5  10 -10 24.5777 38.5425   4
   5 -10  11 175.847 84.3226   5
  -5  10 -11 446.612 116.617   4
   5 -10  12 102.077 73.8432   5
  -5   9  13-73.7310 77.1787   2
  -5   9  12 166.843 86.0082   2
   5  -9 -10 22.8689 41.1153   5
   5  -9  -9 72.1029 54.3595   5
   5  -9  -8-20.1314 52.4198   5
   5  -9  -7 226.766 77.8265   5
   5  -9  -6 28.2160 58.9921   5
   5  -9  -5 149.055 67.3480   5
   5  -9  -5 273.892 70.2411   1
   5  -9  -4 57.1029 66.3168   5
   5  -9  -4 2.07102 29.6752   1
   5  -9  -3 158.044 47.0171   1
   5  -9  -3 188.136 78.9568   5
   5  -9  -3 182.560 44.9300   4
   5  -9  -2 1041.02 100.213   4
   5  -9  -2 985.923 159.556   5
   5  -9  -1-14.2686 57.6828   5
   5  -9  -1-1.91248 22.1734   4
   5  -9   0-29.6990 48.4760   5
   5  -9   1 290.917 94.8590   5
   5  -9   2 34.8816 50.2317   5
   5  -9   3 769.320 141.447   5
   5  -9   4 197.908 83.3490   5
   5  -9   5 8.90371 57.7014   5
   5  -9   6 852.528 150.509   5
  -5   9  -7 2089.61 203.700   4
   5  -9   7 1957.51 227.705   5
   5  -9   8 433.054 114.735   5
  -5   9  -8 467.022 106.495   4
   5  -9   9 1459.32 196.527   5
  -5   9  -9 1384.09 176.911   4
   5  -9  10 191.440 76.5129   5
  -5   9 -10 169.576 68.2828   4
   5  -9  11 170.683 79.0205   5
  -5   9 -11 138.055 72.3379   4
   5  -9  12 401.690 102.429   5
  -5   9 -12 444.201 109.502   4
  -5   9 -13-25.9020 49.5342   4
  -5   8  14 78.4770 66.8589   2
  -5   8  13 92.4574 71.8503   2
  -5   8  12 196.496 86.4197   2
   5  -8 -11 101.559 53.3854   5
   5  -8 -10 803.113 129.717   5
   5  -8  -9-23.8627 57.6908   5
   5  -8  -8 141.282 70.7837   5
   5  -8  -7 86.4995 60.4731   5
   5  -8  -6 1020.22 151.589   5
   5  -8  -6 714.217 108.921   1
   5  -8  -5 105.835 62.0875   5
   5  -8  -5 111.424 45.8378   1
   5  -8  -4 859.847 107.768   1
   5  -8  -4 1027.91 93.9333   4
   5  -8  -4 1032.51 157.160   5
   5  -8  -3 141.880 70.0779   5
   5  -8  -3 103.708 40.7316   1
   5  -8  -3 121.008 33.6139   4
   5  -8  -2 557.135 118.050   5
   5  -8  -2 650.778 69.7559   4
   5  -8  -1 233.788 79.4602   5
   5  -8   0 15.8759 55.8022   5
   5  -8   1 234.050 88.4793   5
   5  -8   2 176.058 76.9493   5
   5  -8   3 116.087 71.0651   5
   5  -8   3 75.7711 19.4216   3
  -5   8  -3 75.1987 15.0680   1
   5  -8   4 527.176 59.2782   3
  -5   8  -4 557.761 37.3061   1
   5  -8   4 417.489 107.885   5
   5  -8   5 411.266 103.742   5
  -5   8  -5 374.244 38.8179   1
  -5   8  -5 396.849 79.0959   4
   5  -8   5 323.819 55.6410   3
  -5   8  -6 436.123 51.1860   1
   5  -8   6 388.889 102.430   5
  -5   8  -6 526.792 91.6074   4
   5  -8   6 443.587 70.9614   3
   5  -8   7 550.215 116.519   5
  -5   8  -7 568.030 98.3501   4
   5  -8   7 293.904 66.6352   3
   5  -8   8 927.553 149.679   5
  -5   8  -8 638.744 110.560   4
   5  -8   9 1077.49 159.138   5
  -5   8  -9 1000.29 141.289   4
   5  -8  10 638.902 129.419   5
  -5   8 -10 837.385 131.644   4
   5  -8  11 759.322 130.687   5
  -5   8 -11 647.954 121.417   4
   5  -8  12 428.713 103.709   5
  -5   8 -12 515.727 113.230   4
  -5   8 -13 302.895 87.5552   4
  -5   7  14 40.5388 55.3507   2
  -5   7  13-32.2062 49.9927   2
  -5   7  12 14.3942 60.0062   2
   5  -7 -11 369.628 86.3468   5
   5  -7 -10 14.9898 42.8403   5
   5  -7  -9 2031.70 164.934   3
   5  -7  -9 2207.25 200.656   5
   5  -7  -8 1177.25 119.011   3
   5  -7  -8 1357.64 162.306   5
   5  -7  -7 4455.26 214.791   3
   5  -7  -7 4410.40 292.458   5
   5  -7  -6 1017.79 149.337   5
   5  -7  -6 1221.05 140.302   1
   5  -7  -5 17.6508 46.7143   5
   5  -7  -5 91.7136 47.1981   1
   5  -7  -5 111.981 36.3443   3
   5  -7  -4 2733.41 191.437   1
   5  -7  -4 2867.07 140.584   3
   5  -7  -4 2805.23 242.445   5
   5  -7  -3 2784.56 183.404   1
   5  -7  -3 2772.04 122.669   4
   5  -7  -3 2717.31 128.631   3
   5  -7  -3 2833.00 243.260   5
   5  -7  -2 221.441 36.1088   4
   5  -7  -2 267.266 40.7739   3
   5  -7  -2 253.822 55.4890   1
  -5   7   1 4362.59 287.507   2
   5  -7  -1 4453.72 305.961   5
  -5   7   1 4571.59 175.589   1
  -5   7   0 8513.04 403.608   2
  -5   7   0 8670.74 227.109   1
   5  -7   0 8584.29 430.715   5
   5  -7   1 5259.96 340.434   5
  -5   7  -1 5512.25 177.796   1
  -5   7  -2 1786.56 102.430   1
   5  -7   2 1727.26 196.983   5
  -5   7  -3 171.363 36.4949   1
   5  -7   3 144.914 29.5527   3
   5  -7   4 332.619 96.3087   5
  -5   7  -4 265.623 46.3996   1
   5  -7   4 293.307 47.0041   3
   5  -7   5 1109.08 160.033   5
  -5   7  -5 1292.40 106.004   1
  -5   7  -5 1124.77 115.896   4
   5  -7   5 1169.72 101.931   3
   5  -7   6-32.8884 48.9728   5
  -5   7  -6-3.76273 30.9916   4
   5  -7   6-9.01897 21.8648   3
   5  -7   7 44.7325 48.3137   5
  -5   7  -7 86.9937 51.9925   4
   5  -7   7-7.19187 21.1787   3
  -5   7  -8 1485.52 152.656   4
   5  -7   8 1334.07 140.080   3
   5  -7   8 1712.18 190.714   5
   5  -7   9 165.090 72.0579   5
  -5   7  -9 326.795 78.0100   4
   5  -7   9 242.359 65.1114   3
   5  -7  10 46.3973 51.1682   5
  -5   7 -10-29.5384 33.9060   4
   5  -7  11 317.113 87.2529   5
   5  -7  12-9.76521 35.0464   5
   5  -7  12 23.8689 68.8714   2
   5  -7  13 401.829 125.960   2
   5  -7  14 118.432 68.0780   2
  -5   6  14 137.720 89.1888   2
  -5   6  13 76.2055 50.6211   2
   5  -6 -12 275.549 67.3224   5
  -5   6  12 234.837 80.3481   2
   5  -6 -12 316.765 85.1634   3
   5  -6 -11 568.065 96.0415   5
  -5   6  11 425.998 107.124   2
   5  -6 -11 536.973 98.0428   3
   5  -6 -10 111.334 45.0938   5
   5  -6 -10 188.029 67.7505   3
   5  -6  -9 36.6002 39.6219   3
   5  -6  -9 69.4671 48.6001   5
   5  -6  -8 1198.66 129.783   3
   5  -6  -8 1237.75 152.304   5
   5  -6  -7 5528.04 305.855   1
   5  -6  -7 5912.18 269.442   3
   5  -6  -7 5418.98 317.211   5
   5  -6  -6 29192.9 676.984   1
   5  -6  -6 28662.9 731.347   5
   5  -6  -5 1728.20 160.684   1
   5  -6  -5 1815.46 192.487   5
   5  -6  -4 1040.17 153.329   5
   5  -6  -4 902.096 110.035   1
   5  -6  -4 770.512 92.2991   3
   5  -6  -3 6658.67 285.032   1
   5  -6  -3 6400.71 140.240   4
   5  -6  -3 6256.97 361.138   5
  -5   6   3 6850.23 250.348   1
   5  -6  -2 1752.72 141.660   1
  -5   6   2 1713.09 122.428   1
   5  -6  -2 1904.72 204.001   5
   5  -6  -1 308.461 101.510   5
  -5   6   1 229.229 62.1701   2
  -5   6   1 268.343 52.0561   1
   5  -6   0 568.701 133.073   5
  -5   6   0 364.024 80.0458   2
  -5   6   0 371.295 56.8057   1
  -5   6  -1 3490.24 253.054   2
  -5   6  -1 3409.88 165.372   1
   5  -6   1 3597.29 284.252   5
   5  -6   2 229.763 90.7969   5
  -5   6  -2 174.161 39.6674   1
  -5   6  -2 209.705 40.0784   4
  -5   6  -2 173.817 63.1601   2
  -5   6  -3 14919.6 557.364   2
  -5   6  -3 15064.9 371.185   1
  -5   6  -3 13991.7 324.880   4
   5  -6   3 15323.7 577.188   5
   5  -6   4 636.003 128.682   5
   5  -6   5 416.298 101.755   5
   5  -6   6 415.482 102.409   5
   5  -6   6 409.054 97.7953   2
   5  -6   6 514.532 73.9670   3
   5  -6   7 322.398 94.6288   5
   5  -6   7 269.281 84.0770   2
   5  -6   7 266.652 60.4790   3
   5  -6   8-6.40727 46.8411   5
   5  -6   8 21.5501 57.2762   2
   5  -6   8-1.03264 27.0928   3
   5  -6   9 668.002 116.535   5
   5  -6   9 550.804 124.583   2
   5  -6  10 408.274 91.8736   5
   5  -6  10 287.943 96.3346   2
   5  -6  11 142.291 91.3390   2
   5  -6  11 80.0741 46.0556   5
   5  -6  12 53.9065 36.1484   5
   5  -6  12 65.3565 57.4613   2
   5  -6  13-71.8706 71.2979   2
   5  -6  14 194.518 100.435   2
  -5   5  14 178.162 68.3117   2
   5  -5 -14 291.976 83.8644   3
   5  -5 -13 2586.12 231.378   3
  -5   5  13 2760.03 248.792   2
   5  -5 -12 257.012 60.8912   5
  -5   5  12 274.069 85.5399   2
   5  -5 -12 280.245 81.9539   3
   5  -5 -11 38.8204 32.5863   5
  -5   5  11 38.9340 43.8152   2
   5  -5 -11 41.8318 42.8849   3
   5  -5 -10 1280.19 150.214   3
  -5   5  10 1140.97 142.449   2
   5  -5 -10 1014.52 126.052   5
   5  -5  -9 309.629 80.8630   5
   5  -5  -9 321.153 78.2255   3
   5  -5  -8 54.5080 46.0686   5
   5  -5  -8 78.7006 44.9592   3
   5  -5  -7-33.0328 61.6024   5
   5  -5  -7-5.60541 47.4598   3
   5  -5  -7 6.68928 40.6412   1
   5  -5  -6-113.924 79.9838   5
   5  -5  -6 1.15086 25.0194   1
   5  -5  -5 2051.05 177.711   1
   5  -5  -5 1843.17 199.879   5
  -5   5   5 1980.69 156.842   1
   5  -5  -4 16326.1 465.633   1
  -5   5   4 16354.5 409.594   1
   5  -5  -3 37116.9 680.676   1
  -5   5   3 36397.4 594.118   1
   5  -5  -2 1360.37 125.985   1
  -5   5   2 1640.33 146.122   2
  -5   5   2 1527.66 119.750   1
  -5   5   1 1413.64 141.431   2
  -5   5   1 1398.25 115.431   1
  -5   5   0 3325.98 223.652   2
  -5   5   0 3617.18 182.826   1
  -5   5  -1 442.525 67.7241   1
  -5   5  -1 484.126 43.7698   4
  -5   5  -1 529.759 98.1852   2
  -5   5  -2 539.279 75.9773   1
  -5   5  -2 650.752 58.6415   4
  -5   5  -2 723.760 118.373   2
  -5   5  -3 2812.74 234.917   2
  -5   5  -4 8833.66 432.927   2
   5  -5   4 8286.99 377.026   2
  -5   5  -5 2092.90 220.816   2
   5  -5   5 1769.82 183.821   2
   5  -5   5 1968.75 212.413   5
   5  -5   6 3181.22 254.331   2
   5  -5   6 2911.36 260.320   5
   5  -5   7 20.6540 46.1708   2
   5  -5   7 25.0294 51.5965   5
   5  -5   8 894.472 150.873   2
   5  -5   8 1038.91 120.951   3
   5  -5   8 1103.15 157.925   5
   5  -5   9 464.904 119.991   2
   5  -5   9 816.261 128.195   5
   5  -5  10 142.966 70.6959   2
   5  -5  10 104.154 46.0705   5
   5  -5  11 510.307 137.436   2
   5  -5  11 490.680 95.2681   5
   5  -5  12 962.234 121.433   5
   5  -5  12 1035.19 188.548   2
   5  -5  13 318.806 125.129   2
   5  -5  14 164.786 96.9060   2
   5  -5  15 124.636 86.8521   2
   5  -4 -16-7.63728 49.3497   3
   5  -4 -15 212.508 84.1338   3
  -5   4  14 8.89485 35.7912   2
   5  -4 -14 17.7768 43.0601   3
  -5   4  13 61.2469 41.1300   2
   5  -4 -13-27.1363 50.8952   3
   5  -4 -12 469.229 75.2757   5
  -5   4  12 515.922 100.056   2
   5  -4 -12 656.174 122.372   3
   5  -4 -11 1214.49 132.054   5
   5  -4 -11 1048.81 145.186   3
  -5   4  11 1391.98 148.369   2
   5  -4 -10 1327.06 158.432   3
   5  -4 -10 1306.49 151.027   5
   5  -4  -9 1212.60 145.116   5
   5  -4  -9 1201.62 149.040   3
   5  -4  -8 2137.23 189.928   3
  -5   4   7 225.626 64.2743   1
   5  -4  -7 223.735 66.7389   3
   5  -4  -7 178.769 59.0977   1
   5  -4  -6 374.110 80.5150   1
  -5   4   6 421.979 74.6780   1
   5  -4  -5 5418.81 279.718   1
  -5   4   5 4896.22 237.333   1
   5  -4  -4 732.039 103.393   1
  -5   4   4 633.990 90.5663   1
  -5   4   3 100.779 38.0475   2
   5  -4  -3 145.959 53.3898   1
  -5   4   3 54.2086 39.5677   1
  -5   4   2 48.1091 32.9571   2
  -5   4   2-7.69510 29.2997   1
  -5   4   1 23834.9 542.445   2
  -5   4   1 24942.1 504.111   1
  -5   4   0 2585.10 187.866   2
  -5   4   0 2785.01 171.531   1
  -5   4  -1 10391.4 395.948   2
  -5   4  -1 10378.2 336.158   1
   5  -4   2 157.545 54.8369   2
  -5   4  -2 135.939 57.2935   2
   5  -4   3-34.6469 44.5522   2
  -5   4  -3 14.5641 25.8720   2
   5  -4   4 435.332 91.6852   2
  -5   4  -4 429.563 92.4380   2
  -5   4  -5 7473.71 400.494   2
   5  -4   5 7252.84 364.860   2
  -5   4  -6 2813.66 254.410   2
   5  -4   6 2576.00 233.489   2
   5  -4   7 10802.0 486.761   2
   5  -4   8 6777.86 402.222   2
   5  -4   9 932.150 142.436   5
   5  -4   9 735.680 141.865   2
   5  -4  10 412.574 92.0406   5
   5  -4  10 490.891 132.069   2
   5  -4  11-40.0153 39.8574   5
   5  -4  11-168.489 91.4094   2
   5  -4  12 3735.79 350.809   2
   5  -4  12 2959.00 206.389   5
   5  -4  13 901.115 179.066   2
   5  -4  14 250.918 115.757   2
   5  -4  15 464.000 145.325   2
   5  -3 -16 87.5765 68.6223   3
   5  -3 -15 566.198 122.428   3
   5  -3 -14 72.6800 54.0068   3
   5  -3 -13 385.050 101.384   3
   5  -3 -12 61.0434 38.3193   5
   5  -3 -12-61.0033 55.6926   3
  -5   3  11 131.059 52.4770   2
   5  -3 -11 132.392 58.4371   3
  -5   3  10 415.885 72.0330   2
   5  -3 -10 348.348 89.6882   3
  -5   3   9 409.260 66.4824   2
   5  -3  -9 106.568 55.1189   3
  -5   3   8 432.912 86.1854   1
  -5   3   8 285.757 54.0558   2
   5  -3  -8 242.963 80.1597   3
  -5   3   7 514.172 87.8105   1
   5  -3  -7 544.712 100.587   1
   5  -3  -6 2713.18 113.720   4
   5  -3  -6 2969.35 216.633   1
  -5   3   6 2602.62 182.613   1
  -5   3   5 724.927 72.4174   2
   5  -3  -5 710.676 103.537   1
   5  -3  -5 690.068 51.1887   4
  -5   3   5 615.362 90.7429   1
  -5   3   4 2142.36 125.654   2
   5  -3  -4 2099.27 172.485   1
  -5   3   4 2141.05 158.634   1
   5  -3  -3 4746.25 250.592   1
  -5   3   3 4806.03 233.657   1
  -5   3   3 4596.50 198.161   2
  -5   3   2 1271.17 112.472   2
  -5   3   2 1312.75 126.434   1
  -5   3   1 6840.86 271.385   2
  -5   3   1 6602.71 276.344   1
   5  -3   0 479.623 73.7494   2
  -5   3   0 490.605 82.8178   1
  -5   3   0 510.662 83.5361   2
  -5   3  -1 3065.96 207.699   2
   5  -3   1 2889.09 183.861   2
   5  -3   2 43160.2 753.160   2
  -5   3  -2 43990.4 816.595   2
  -5   3  -3 10320.2 415.775   2
   5  -3   3 10678.1 399.144   2
  -5   3  -4 354.339 86.5658   2
   5  -3   4 220.119 70.8056   2
   5  -3   5 15723.1 539.992   2
  -5   3  -5 16483.2 569.126   2
  -5   3  -6 371.908 93.5305   2
   5  -3   6 478.251 111.286   2
   5  -3   7 1093.61 164.136   2
   5  -3   8 18138.5 663.931   2
   5  -3   9 1477.36 203.984   2
   5  -3  10 102.542 70.3341   2
   5  -3  11 1947.35 246.369   2
   5  -3  12 1532.67 232.918   2
   5  -3  13 230.341 107.830   2
   5  -3  14 2337.33 301.729   2
   5  -3  15 788.382 184.945   2
   5  -2 -16-23.5777 79.3193   3
   5  -2 -15-247.915 92.7986   3
   5  -2 -14 593.508 121.719   3
  -5   2  13 374.131 69.2185   2
   5  -2 -13 558.057 121.690   3
  -5   2  12 730.225 92.8940   2
   5  -2 -12 700.495 128.679   3
   5  -2 -11 3246.20 200.685   5
  -5   2  11 3013.28 169.022   2
   5  -2 -11 2771.69 249.165   3
  -5   2  10 2506.23 139.387   2
   5  -2 -10 2393.77 230.833   3
   5  -2  -9 3155.51 260.334   3
  -5   2   9 3504.54 236.363   1
  -5   2   9 3607.78 149.359   2
   5  -2  -8 4875.96 201.935   4
  -5   2   8 4228.28 250.144   1
  -5   2   8 4435.71 145.620   2
  -5   2   7-8.81107 12.2981   2
  -5   2   7 2.77779 12.0523   2
   5  -2  -7 9.92213 18.6148   4
   5  -2  -7-42.9362 37.8316   1
  -5   2   7 34.9967 41.4365   1
  -5   2   6 247.131 28.8370   2
   5  -2  -6 211.876 67.5277   1
   5  -2  -6 252.265 42.8279   4
  -5   2   6 224.191 30.4434   2
  -5   2   5 8686.86 188.070   2
   5  -2  -5 9114.65 370.966   1
   5  -2  -5 8680.64 219.528   4
   5  -2  -4 1505.48 148.972   1
  -5   2   4 1467.23 86.9912   2
  -5   2   3 12234.7 281.553   2
   5  -2  -3 13039.5 422.040   1
  -5   2   2 33259.8 505.659   2
  -5   2   2 31846.5 316.706   4
  -5   2   1 3077.68 170.788   2
   5  -2  -1 3222.06 160.155   2
  -5   2   0 5099.84 235.052   2
   5  -2   0 4842.90 219.387   2
   5  -2   1 11052.4 359.515   2
  -5   2  -1 11181.0 369.621   2
   5  -2   2 2435.59 184.997   2
  -5   2  -2 2415.08 183.172   2
   5  -2   3 13079.3 448.484   2
  -5   2  -3 12767.6 441.895   2
  -5   2  -4 267.409 70.3401   2
   5  -2   4 350.947 88.6148   2
   5  -2   5 2575.50 224.481   2
  -5   2  -5 2690.45 224.424   2
  -5   2  -6 12.2005 32.3719   2
   5  -2   6 30.6975 55.8183   2
   5  -2   7 12757.0 541.073   2
   5  -2   8 18064.9 670.667   2
   5  -2   9 5311.52 384.816   2
   5  -2  10 500.478 142.113   2
   5  -2  11 3279.05 203.024   5
   5  -2  11 4149.60 365.575   2
   5  -2  12 110.525 79.9066   2
   5  -2  13 52.3356 71.2376   2
   5  -2  14-16.2343 51.5510   2
   5  -2  15 75.8981 83.8266   2
   5  -1 -17 208.464 82.3305   4
   5  -1 -16 1833.70 222.288   4
   5  -1 -15 170.499 72.3344   4
   5  -1 -15 111.944 71.6233   3
   5  -1 -14 645.639 122.884   4
   5  -1 -14 420.833 110.397   3
   5  -1 -13 44.9597 35.6881   4
   5  -1 -13-69.1870 81.3281   3
   5  -1 -12 40.3590 39.0586   4
   5  -1 -12 5.66965 45.0268   3
  -5   1  12 25.9514 16.3140   2
  -5   1  11 1246.90 59.6861   2
   5  -1 -11 1561.67 148.495   4
   5  -1 -11 1381.54 187.324   3
   5  -1 -11 1372.70 135.526   5
   5  -1 -10 1.54433 25.1951   5
   5  -1 -10 19.6394 35.1504   4
   5  -1 -10-37.1159 58.9217   3
  -5   1   9 158.866 66.1921   1
   5  -1  -9 91.1312 43.9206   5
   5  -1  -9 37.1496 30.0568   4
   5  -1  -8 1703.49 149.557   5
   5  -1  -8 1697.92 130.325   4
  -5   1   8 1613.04 157.063   1
   5  -1  -7 13850.4 488.683   1
   5  -1  -7 12845.7 337.165   4
  -5   1   7 13034.2 426.505   1
   5  -1  -6 15102.9 352.621   4
  -5   1   6 14560.6 442.886   1
   5  -1  -5 82.0487 42.0363   1
   5  -1  -4 388.196 75.2128   1
  -5   1   3 2969.11 126.444   4
  -5   1   3 3412.49 114.302   2
  -5   1   2 113.966 29.4107   2
  -5   1   2 130.392 29.7785   4
   5  -1  -2 99.4063 30.5405   2
  -5   1   1 196.555 42.7782   2
   5  -1  -1 231.553 52.2067   2
  -5   1   0 26.4071 21.9845   2
   5  -1   0 13.8613 29.7129   2
   5  -1   1 17463.0 460.401   2
  -5   1  -1 17068.6 437.313   2
   5  -1   2 1688.60 155.433   2
  -5   1  -2 1639.97 147.186   2
   5  -1   3 5894.59 304.803   2
  -5   1  -3 6107.15 299.579   2
   5  -1   4 5328.38 306.845   2
  -5   1  -4 5244.55 293.156   2
   5  -1   5 2105.89 204.208   2
  -5   1  -5 2292.37 207.047   2
   5  -1   6 2141.43 214.350   2
  -5   1  -6 1922.06 195.947   2
   5  -1   7-12.9956 51.1350   2
   5  -1   8 799.042 108.045   5
   5  -1   8 905.378 160.719   2
   5  -1   9 1.62185 23.5344   5
   5  -1   9 40.3514 72.3499   2
   5  -1  10 8020.34 494.300   2
   5  -1  10 7848.57 329.036   5
   5  -1  11 1421.58 224.602   2
   5  -1  11 1277.60 130.323   5
   5  -1  12 575.171 155.863   2
   5  -1  13 240.307 108.715   2
   5  -1  14-75.8591 79.8711   2
   5   0 -17 15.9228 42.7770   4
   5   0 -16 87.0582 68.4647   4
   5   0 -15 254.666 87.1385   4
   5   0 -15 339.295 108.788   3
   5   0 -14 4651.99 319.551   4
   5   0 -14 4240.91 345.313   3
   5   0 -13 9951.51 435.235   4
   5   0 -13 9294.43 498.661   3
   5   0 -12 205.996 73.6908   4
   5   0 -12 16.2328 66.4037   3
   5   0 -11-47.0216 36.5091   5
   5   0 -11 95.3950 51.5763   4
   5   0 -11-32.1704 78.9498   3
   5   0 -10 5207.50 270.124   4
   5   0 -10 5469.93 378.732   3
  -5   0  10 5302.63 302.405   1
   5   0 -10 5280.13 276.084   5
   5   0  -9 700.458 103.507   5
  -5   0   9 729.329 113.215   1
   5   0  -9 779.193 102.397   4
   5   0  -8 1196.74 120.421   4
  -5   0   8 1069.98 131.534   1
   5   0  -8 1064.57 123.895   5
   5   0  -7 10227.9 429.504   1
   5   0  -7 9630.44 327.349   4
  -5   0   7 10020.9 382.843   1
   5   0  -7 9380.80 364.293   5
   5   0  -6 1015.04 145.141   1
  -5   0   6 806.318 110.693   1
   5   0  -6 1073.19 123.997   5
   5   0  -5-21.0603 49.1641   1
  -5   0   5 51.3426 38.6764   1
   5   0  -5 52.8713 38.2310   5
   5   0  -4 48986.4 805.231   5
  -5   0   4 47415.4 599.938   4
   5   0  -3 728.420 100.710   5
   5   0  -3 721.570 59.1369   2
  -5   0   3 610.098 68.8763   4
   5   0  -2 1911.30 160.923   5
   5   0  -2 1738.10 114.018   2
  -5   0   2 1950.26 129.752   4
   5   0  -1 2716.06 159.530   2
   5   0   0 3003.99 183.245   2
  -5   0   0 2989.21 167.393   2
  -5   0  -1 2.09233 23.2296   2
   5   0   1 11.8617 36.8370   2
   5   0   2 1252.23 133.419   5
  -5   0  -2 1233.00 126.599   2
   5   0   2 987.557 122.116   2
  -5   0  -3 62.3872 34.9916   2
   5   0   3 98.4510 46.9471   5
   5   0   3 52.0499 41.4177   2
  -5   0  -4-20.9820 36.7160   2
   5   0   4-13.5254 27.3366   5
   5   0   4 18.8175 44.7840   2
   5   0   5 1345.04 141.725   5
   5   0   5 1366.33 168.911   2
  -5   0  -5 1495.00 163.342   2
   5   0   6 5774.02 295.924   5
   5   0   6 5936.45 361.830   2
  -5   0  -6 5865.95 338.825   2
   5   0   7 131.485 51.8607   5
   5   0   7 19.0100 53.5828   2
   5   0   8 5058.97 365.930   2
   5   0   8 4828.84 271.284   5
   5   0   9 773.112 111.000   5
   5   0   9 560.533 130.186   2
   5   0  10 1253.09 209.705   2
   5   0  10 1048.50 127.411   5
   5   0  11 189.140 87.4941   2
   5   0  12 92.9852 89.9227   2
   5   0  13 192.314 88.1957   2
   5   0  14 185.911 109.467   2
   5   1 -16 21.2060 48.8622   4
   5   1 -15 238.577 86.2687   4
   5   1 -15 209.359 86.3945   3
   5   1 -14 250.264 87.0796   4
   5   1 -14 254.012 92.6289   3
   5   1 -13 1001.03 147.761   4
   5   1 -13 975.804 174.074   3
   5   1 -12 2143.80 203.111   4
   5   1 -12 1657.10 222.364   3
   5   1 -11 4284.43 274.265   4
   5   1 -11 4253.77 351.278   3
   5   1 -11 3766.27 246.469   5
   5   1 -10 1714.78 168.251   4
  -5  -1  10 1871.06 183.303   1
   5   1 -10 1775.09 171.594   5
   5   1  -9 106.741 36.1975   5
   5   1  -9 31.8284 37.3124   4
  -5  -1   9 180.970 60.4089   1
  -5  -1   8-20.1605 40.1031   1
   5   1  -8-13.4753 25.4282   5
   5   1  -8-14.2040 30.2896   4
   5   1  -7-17.9258 45.4069   1
   5   1  -7 20.3059 27.9933   5
  -5  -1   7-13.2539 42.0461   1
   5   1  -6 1119.13 141.569   1
  -5  -1   6 1186.36 134.147   1
   5   1  -6 1155.74 135.953   5
   5   1  -5 265.538 68.4657   5
  -5  -1   5 346.376 60.3944   4
  -5  -1   5 385.521 80.5362   1
  -5  -1   4 1226.59 111.261   4
  -5  -1   4 1123.17 134.411   1
   5   1  -4 1179.39 137.388   5
   5   1  -4 1357.36 77.0970   2
   5   1  -3 370.658 79.2627   5
  -5  -1   3 359.257 81.4260   1
   5   1  -3 348.828 50.1376   2
  -5  -1   3 468.132 70.3166   4
  -5  -1   2 3690.59 241.214   1
   5   1  -2 3543.04 172.463   2
   5   1  -2 3863.64 245.886   5
  -5  -1   1 36269.4 763.202   1
   5   1  -1 34671.9 592.012   2
   5   1  -1 35509.3 738.637   5
   5   1   0 14718.3 415.655   2
   5   1   0 14768.0 480.142   5
   5   1   1 1193.74 133.616   2
   5   1   1 1177.17 136.742   5
   5   1   2 11504.3 421.345   2
   5   1   2 12184.1 442.007   5
   5   1   3 92.0797 45.6563   5
   5   1   3-6.70495 43.9320   2
   5   1   4 888.633 122.301   5
   5   1   4 747.040 123.603   2
   5   1   5 918.699 144.417   2
   5   1   5 1081.45 137.597   5
   5   1   6 8742.53 450.367   2
   5   1   6 8300.60 380.896   5
   5   1   7 514.421 102.133   5
   5   1   7 575.443 128.947   2
   5   1   8 22527.1 621.994   5
   5   1   8 22549.8 786.791   2
   5   1   9 221.011 70.1886   5
   5   1   9 135.878 90.8177   2
   5   1  10 3019.15 321.529   2
   5   1  10 2716.36 215.364   5
   5   1  11 127.261 81.1824   2
   5   1  12 253.398 105.102   2
   5   1  13 281.194 125.624   2
   5   2 -16 240.269 100.068   4
   5   2 -15 605.127 140.207   4
   5   2 -15 681.522 153.308   3
   5   2 -14 301.514 98.9991   4
   5   2 -14 240.133 94.4884   3
   5   2 -13 40.5919 49.2142   4
   5   2 -13 1.78387 55.3305   3
   5   2 -12 226.547 81.3115   4
   5   2 -12 201.025 98.7393   3
   5   2 -11-103.968 72.5314   4
   5   2 -11-14.4040 79.4232   3
  -5  -2  10 571.237 105.529   1
   5   2 -10 465.592 96.4708   5
   5   2 -10 386.647 87.2315   4
   5   2  -9 17.3012 28.4697   5
  -5  -2   9 9.51823 38.3554   1
  -5  -2   8 2900.77 217.950   1
   5   2  -8 2948.50 232.859   5
   5   2  -7 637.436 111.917   5
  -5  -2   7 577.280 98.4754   1
   5   2  -6 6714.59 139.947   2
  -5  -2   6 7041.20 329.069   1
   5   2  -6 7341.19 143.613   2
   5   2  -6 7310.38 362.880   5
  -5  -2   5 2435.88 174.302   4
  -5  -2   5 2287.07 189.000   1
   5   2  -5 2517.13 113.045   2
   5   2  -5 2412.23 207.638   5
   5   2  -4 481.068 95.6224   5
  -5  -2   4 532.452 84.2097   4
  -5  -2   4 473.569 98.6171   1
   5   2  -4 523.692 61.4783   2
  -5  -2   3 2827.01 215.928   1
  -5  -2   3 2672.36 185.886   4
   5   2  -3 2764.44 154.707   2
   5   2  -3 2755.14 221.552   5
  -5  -2   2 1765.56 176.055   1
   5   2  -2 2096.15 147.971   2
   5   2  -2 1998.05 189.280   5
  -5  -2   1 5081.82 298.312   1
   5   2  -1 5036.40 246.487   2
   5   2  -1 5032.95 300.479   5
   5   2   0 13058.5 426.230   2
   5   2   0 13706.0 497.342   5
   5   2   1 18168.5 525.549   2
   5   2   1 18236.9 578.777   5
   5   2   2 921.531 132.624   5
   5   2   2 963.077 130.738   2
   5   2   3 9477.04 422.680   2
   5   2   3 9535.82 422.870   5
   5   2   4 1544.64 184.714   2
   5   2   4 1795.13 187.377   5
   5   2   5 831.505 128.659   5
   5   2   5 881.519 147.493   2
   5   2   6 3713.36 307.507   2
   5   2   6 3847.79 275.303   5
   5   2   7 1351.49 195.407   2
   5   2   8 2274.66 261.589   2
   5   2   9 2046.59 264.584   2
   5   2  10 227.793 119.593   2
   5   2  11 408.371 135.950   2
   5   2  12 63.3499 74.4343   2
   5   3 -15 992.162 170.747   4
   5   3 -14 43.0698 43.2214   4
   5   3 -14 113.426 85.2979   3
   5   3 -13 953.040 161.775   4
   5   3 -13 811.705 169.462   3
   5   3 -12 149.556 64.3632   4
   5   3 -12-132.197 83.1529   3
   5   3 -11 5.32592 62.2313   3
  -5  -3  10 374.152 89.2164   1
  -5  -3   9 364.972 82.3403   1
   5   3  -8 1803.72 87.2930   2
  -5  -3   8 1932.71 180.044   1
   5   3  -7 3038.46 136.144   2
  -5  -3   7 3258.64 230.958   1
   5   3  -6 420.570 56.4602   2
  -5  -3   6 473.596 94.0262   1
   5   3  -6 443.387 59.5928   2
  -5  -3   5 2136.49 192.389   1
   5   3  -5 2473.56 142.940   2
  -5  -3   4 4350.26 273.256   1
   5   3  -4 4070.61 201.027   2
   5   3  -3 235.659 51.2955   2
  -5  -3   3 303.880 83.8811   1
  -5  -3   2 19680.3 595.633   1
   5   3  -2 19471.6 501.355   2
  -5  -3   1 1898.01 189.519   1
   5   3  -1 2173.94 181.522   2
   5   3   0 1265.67 145.442   2
   5   3   1 0.52304 50.6976   2
   5   3   2 10849.2 464.670   2
   5   3   3 3080.07 261.086   2
   5   3   4 25446.6 772.573   2
   5   3   5 1.86958 60.9029   2
   5   3   6 7909.30 469.749   2
   5   3   7 918.185 168.770   2
   5   3   8 1593.80 234.176   2
   5   3   9-28.3923 70.0475   2
   5   3  10 1369.47 231.574   2
   5   3  11 57.7600 71.3513   2
   5   3  12 827.778 194.393   2
   5   4 -14-109.159 75.6774   3
   5   4 -13 242.769 102.717   3
   5   4 -12 943.029 197.477   3
   5   4 -11 237.024 110.724   3
  -5  -4  10 1932.17 186.663   1
  -5  -4   9 393.018 87.3819   1
  -5  -4   8 76.1986 38.8302   1
  -5  -4   7 119.201 58.0813   1
  -5  -4   6 242.889 72.0905   1
   5   4  -6 145.607 41.6150   2
  -5  -4   5 557.436 101.471   1
  -5  -4   4 930.824 130.467   1
  -5  -4   3 976.457 138.101   1
   5   4  -3 1033.98 126.463   2
  -5  -4   2 13.1036 48.2207   1
   5   4  -2-21.4033 43.3519   2
  -5  -4   1 3722.15 271.404   1
   5   4  -1 3854.03 260.761   2
   5   4   0 1110.99 148.526   2
   5   4   1 2683.25 236.874   2
   5   4   2 3291.20 274.257   2
   5   4   3 713.678 138.790   2
   5   4   4 2341.67 252.400   2
   5   4   5 2983.03 297.357   2
   5   4   6 5127.24 400.211   2
   5   4   7 2753.51 309.058   2
   5   4   8-15.3851 60.5347   2
   5   4   9 116.052 65.6041   2
   5   4  10 40.4869 72.2434   2
   5   5 -13 598.618 165.595   3
   5   5 -12 930.857 184.434   3
   5   5 -11 1106.70 203.051   3
  -5  -5  10 18.1868 30.7317   1
  -5  -5   9 469.909 94.6745   1
  -5  -5   8 1110.91 137.737   1
  -5  -5   7 1064.53 138.372   1
  -5  -5   6 1053.46 132.932   1
  -5  -5   5-48.4692 39.6701   1
  -5  -5   4 713.708 121.106   1
  -5  -5   3-6.43025 44.4430   1
  -5  -5   2 500.435 101.115   1
   5   5  -2 446.233 99.2805   2
  -5  -5   1 42.7249 49.7879   1
   5   5  -1 88.5285 49.5398   2
   5   5   0 2847.73 252.861   2
   5   5   1 1257.35 179.336   2
   5   5   2 5388.53 376.537   2
   5   5   3 1274.71 196.659   2
   5   5   4 5312.85 404.162   2
   5   5   5-76.7911 70.1078   2
   5   5   6 143.939 84.4902   2
   5   5   7-87.9031 77.9207   2
   5   5   8 2023.50 286.685   2
   5   5   9 139.265 98.2265   2
   5   6 -12 141.388 98.3022   3
   5   6 -11 127.366 79.9887   3
   5   6 -10 346.653 104.242   3
  -5  -6  10 343.750 81.2531   1
  -5  -6   9 76.0450 39.7527   1
  -5  -6   8 543.117 102.086   1
  -5  -6   7-53.2441 37.3020   1
  -5  -6   6 390.723 85.5100   1
  -5  -6   5 1379.92 159.419   1
  -5  -6   4-37.6085 40.9119   1
  -5  -6   3 1477.60 173.437   1
   5   6  -2 305.588 90.6311   2
  -5  -6   2 384.836 92.2712   1
  -5  -6   1 104.302 58.9648   1
   5   6  -1 183.693 74.5039   2
   5   6   0-16.2670 67.1338   2
  -5  -6   0-19.5132 47.4044   1
   5   6   1 2470.90 268.030   2
   5   6   2 75.7485 62.7272   2
   5   6   3 1564.33 226.316   2
   5   6   4 2864.01 314.358   2
   5   6   5 2554.69 309.877   2
   5   6   6-51.1241 75.6393   2
   5   6   7 41.5052 56.8365   2
   5   7 -10 493.362 154.963   3
  -5  -7   5 750.609 117.526   1
  -5  -7   4 905.968 135.123   1
  -5  -7   3 861.139 166.717   5
  -5  -7   3 789.905 130.390   1
   5   7  -2 1070.84 174.158   2
  -5  -7   2 1026.44 187.422   5
  -5  -7   2 764.555 127.663   1
  -5  -7   1 152.320 72.2537   1
   5   7  -1 237.130 102.509   2
  -5  -7   1 415.107 131.168   5
  -5  -7   0 1432.18 187.356   1
   5   7   0 1509.39 217.447   2
   5   7   1-159.339 84.9497   2
  -5  -7  -1 21.5914 49.4459   1
   5   7   2-144.224 90.5541   2
   5   7   3 4.84337 75.1641   2
   5   7   4 923.838 198.708   2
   5   7   5 262.679 119.565   2
   5   8  -2 109.533 71.0752   2
   5   8  -1 4374.04 384.317   2
   5   8   0 31.3988 55.2594   2
   5   8   1 365.828 130.440   2
   5   8   2 803.446 181.412   2
   6 -11  -9-89.1004 67.1129   5
   6 -11  -8 754.464 162.198   5
   6 -11  -7-20.9230 49.4777   5
   6 -11  -6 71.1264 64.8178   5
   6 -11  -5 775.737 161.020   5
   6 -11  -4 152.335 76.2074   5
   6 -11  -3 68.7557 64.1662   5
   6 -11  -2 58.1465 59.9899   5
   6 -11  -1-10.1412 77.7182   5
   6 -11   0 193.150 87.6271   5
   6 -11   1 35.4037 70.8305   5
   6 -11   2 101.522 74.6732   5
   6 -11   3 63.0960 59.9511   5
   6 -11   4 208.311 72.7293   5
   6 -11   5 3262.20 329.604   5
   6 -11   6 625.650 145.681   5
   6 -11   7 425.635 138.898   5
   6 -11   8-38.7238 65.0721   5
   6 -11   9 235.890 107.167   5
   6 -11  10 135.643 78.4088   5
   6 -10 -10-32.4979 56.5708   5
   6 -10  -9-61.3783 53.7786   5
   6 -10  -8-50.1833 55.0677   5
   6 -10  -7 235.308 90.4571   5
   6 -10  -6 106.408 73.5199   5
   6 -10  -5 184.172 88.5762   5
   6 -10  -4 324.717 108.357   5
   6 -10  -3 61.3090 81.2393   5
   6 -10  -2 2260.05 252.410   5
   6 -10  -1 72.5349 75.3348   5
   6 -10   0 366.040 108.790   5
   6 -10   1 233.239 92.7183   5
   6 -10   2 69.7611 60.5440   5
   6 -10   3-4.70732 74.2306   5
   6 -10   4 1549.40 218.815   5
   6 -10   5 169.329 72.8131   5
   6 -10   6 1652.74 224.122   5
   6 -10   7 164.527 79.8662   5
   6 -10   8 203.546 94.1847   5
   6 -10   9 721.992 157.597   5
  -6  10  -9 802.324 143.300   4
   6 -10  10 97.5154 66.5951   5
  -6  10 -10 62.3364 44.1208   4
   6 -10  11 48.7966 48.6389   5
  -6  10 -11-60.7098 50.9663   4
  -6  10 -12 120.550 75.6767   4
  -6   9  13 114.412 76.6438   2
  -6   9  12 287.050 117.313   2
   6  -9 -11 275.506 91.1564   5
   6  -9 -10 832.824 149.390   5
   6  -9  -9 300.758 94.1182   5
   6  -9  -8 3.97609 42.3483   5
   6  -9  -7-82.3132 58.2913   5
   6  -9  -6-14.3838 39.5080   5
   6  -9  -5 126.802 81.7853   5
   6  -9  -5 159.007 52.5760   1
   6  -9  -4 178.923 55.2904   1
   6  -9  -4 107.807 66.9102   5
   6  -9  -3-63.5626 79.0913   5
   6  -9  -2-57.2152 75.5814   5
   6  -9  -1 280.337 93.3415   5
   6  -9   0 125.993 80.4551   5
   6  -9   1-46.9438 59.2796   5
   6  -9   2 98.7451 62.6150   5
   6  -9   3-55.4840 83.3278   5
   6  -9   4 202.629 78.4245   5
   6  -9   5 9.95934 45.1674   5
   6  -9   6 1110.73 178.389   5
  -6   9  -6 1473.71 161.469   4
   6  -9   7 416.667 112.133   5
  -6   9  -7 516.842 100.414   4
   6  -9   8 439.831 114.604   5
  -6   9  -8 320.231 83.9136   4
   6  -9   9 88.2758 75.1201   5
  -6   9  -9 121.820 62.4484   4
   6  -9  10 51.1491 52.5047   5
  -6   9 -10 29.1143 46.3862   4
   6  -9  11-31.5735 47.1106   5
  -6   9 -11 39.7431 38.8015   4
   6  -9  12 174.464 74.1486   5
  -6   9 -12 98.8811 50.0607   4
  -6   9 -13 388.538 106.097   4
  -6   8  13 129.829 73.0056   2
  -6   8  12-21.6339 36.8813   2
   6  -8 -11 807.226 134.511   5
   6  -8 -10-164.063 67.6648   5
   6  -8  -9 1269.38 131.219   3
   6  -8  -9 1753.67 198.060   5
   6  -8  -8 399.727 103.664   5
   6  -8  -8 479.744 78.5092   3
   6  -8  -7 918.708 153.488   5
   6  -8  -7 786.952 92.3591   3
   6  -8  -6 947.628 156.867   5
   6  -8  -5-54.6219 76.2114   5
   6  -8  -5 15.0004 28.7121   1
   6  -8  -5 9.28247 14.6231   4
   6  -8  -5 46.5172 27.6045   3
   6  -8  -4 3289.24 226.831   1
   6  -8  -4 3583.95 129.822   4
   6  -8  -4 3646.03 162.251   3
   6  -8  -4 3332.59 284.775   5
   6  -8  -3 635.707 137.011   5
   6  -8  -3 625.346 64.4962   3
   6  -8  -3 592.904 93.7064   1
   6  -8  -2-9.30118 56.4944   5
   6  -8  -2 4.76144 17.1075   3
   6  -8  -1 1563.04 201.771   5
  -6   8   1 1427.07 107.627   1
   6  -8   0 1017.13 168.281   5
  -6   8   0 1129.78 91.9459   1
   6  -8   1 1396.06 194.744   5
  -6   8  -1 1443.39 100.518   1
  -6   8  -2 5605.50 194.052   1
   6  -8   2 5194.29 365.860   5
   6  -8   3 833.063 153.216   5
  -6   8  -3 1027.48 86.7266   1
   6  -8   3 979.860 79.0722   3
  -6   8  -4 387.587 58.9106   1
   6  -8   4 322.387 52.6802   3
   6  -8   5 249.468 80.4235   5
  -6   8  -5 339.246 57.3042   1
  -6   8  -5 245.960 62.2161   4
   6  -8   5 278.791 51.8428   3
   6  -8   6 1314.78 185.646   5
  -6   8  -6 1402.29 123.585   1
  -6   8  -6 1270.49 137.545   4
   6  -8   6 1262.91 121.017   3
   6  -8   7-76.8314 70.6376   5
  -6   8  -7 27.6106 31.4321   4
   6  -8   7-36.4089 31.3714   3
   6  -8   8 153.698 70.8505   5
  -6   8  -8 42.4219 43.4167   4
  -6   8  -9 426.449 93.9221   4
   6  -8   9 575.141 122.857   5
   6  -8  10-87.0576 59.4733   5
  -6   8 -10 5.45400 31.8858   4
   6  -8  11 297.300 88.8643   5
  -6   8 -11 379.292 94.0715   4
   6  -8  12 31.6648 41.8478   5
  -6   8 -12 128.751 64.4295   4
  -6   8 -13 3.22661 31.8310   4
  -6   7  13-60.8035 48.4149   2
  -6   7  12 160.452 70.0159   2
   6  -7 -12 99.0527 51.8330   3
   6  -7 -11 156.397 70.3587   5
   6  -7 -11 151.247 58.6673   3
   6  -7 -10 763.230 127.250   5
   6  -7 -10 818.613 119.468   3
   6  -7  -9 661.312 124.952   5
   6  -7  -9 668.943 103.909   3
   6  -7  -8 5541.79 278.290   3
   6  -7  -8 5666.50 346.281   5
   6  -7  -7 595.696 123.016   5
   6  -7  -7 593.704 92.0158   3
   6  -7  -6-0.33311 59.4445   5
   6  -7  -6-40.0158 50.8299   3
   6  -7  -5 85.3370 45.9983   1
   6  -7  -5 98.2766 19.8761   4
   6  -7  -4 1284.55 145.779   1
   6  -7  -4 1507.48 133.312   3
   6  -7  -4 1527.42 197.137   5
   6  -7  -3 1939.48 169.485   1
  -6   7   3 2299.12 210.411   2
   6  -7  -3 1848.65 219.191   5
  -6   7   3 2372.08 160.403   1
  -6   7   2 1811.24 186.631   2
  -6   7   2 1787.76 134.072   1
   6  -7  -2 1765.37 215.391   5
   6  -7  -1-28.7461 68.4818   5
  -6   7   1 26.0652 26.1225   1
  -6   7   0 1894.27 134.428   1
   6  -7   0 1781.74 223.296   5
  -6   7  -1 6026.69 238.154   1
   6  -7   1 5304.81 374.087   5
   6  -7   2 538.771 127.240   5
  -6   7  -2 605.106 81.1509   1
   6  -7   3 524.968 126.953   5
  -6   7  -3 597.904 81.5373   1
  -6   7  -3 508.999 68.2719   4
   6  -7   4 142.032 83.4857   5
  -6   7  -4 178.558 50.6974   1
  -6   7  -5 3396.43 192.949   4
   6  -7   5 3101.94 282.383   5
   6  -7   6 94.3463 83.6794   5
   6  -7   6 160.618 47.0355   3
  -6   7  -6 33.5112 32.5855   4
   6  -7   7 168.367 76.4194   5
  -6   7  -7 139.162 48.1564   4
   6  -7   7 168.957 51.4008   3
   6  -7   8 375.923 100.188   5
  -6   7  -8 161.074 53.3712   4
   6  -7   8 234.029 65.5731   3
   6  -7   9 995.495 156.903   5
   6  -7   9 1398.12 213.987   2
   6  -7  10 726.159 133.890   5
   6  -7  10 808.745 167.429   2
   6  -7  11 39.2941 46.0275   5
   6  -7  11-53.4053 63.2516   2
   6  -7  12-2.45445 51.1284   5
   6  -7  12 166.614 90.5572   2
   6  -7  13-178.690 90.6229   2
   6  -6 -15 1009.67 158.968   3
   6  -6 -14 71.7454 53.0560   3
  -6   6  13 644.733 126.892   2
   6  -6 -13 798.613 133.805   3
   6  -6 -12 34.0918 37.5915   5
  -6   6  12 134.484 60.6612   2
   6  -6 -12 152.860 71.8445   3
   6  -6 -11 11.7047 35.2607   5
  -6   6  11 50.2240 40.5406   2
   6  -6 -11 32.1078 42.0324   3
   6  -6 -10 817.223 130.618   5
   6  -6 -10 615.600 111.079   3
   6  -6  -9 33.3413 46.6001   5
   6  -6  -9 126.738 52.9657   3
   6  -6  -8 1419.55 154.819   3
   6  -6  -8 1655.91 191.926   5
   6  -6  -7 947.146 158.015   5
   6  -6  -7 1022.65 130.752   3
   6  -6  -6 10413.0 438.200   1
   6  -6  -6 9541.57 387.189   3
   6  -6  -6 10270.9 500.412   5
   6  -6  -5 7406.23 426.586   5
   6  -6  -5 7481.40 359.082   1
  -6   6   5 8210.49 323.688   1
   6  -6  -4 17.9123 64.7852   5
   6  -6  -4 36.3730 29.2567   1
  -6   6   4 44.8650 40.8871   1
   6  -6  -3 369.112 131.689   5
  -6   6   3 307.484 77.8677   2
  -6   6   3 426.543 79.3353   1
   6  -6  -3 486.522 90.8620   1
  -6   6   2 3211.44 229.840   2
  -6   6   2 3079.95 183.450   1
  -6   6   1 382.969 85.8011   2
  -6   6   1 313.852 61.5285   1
  -6   6   0 4756.66 301.232   2
  -6   6   0 4856.30 231.420   1
  -6   6  -1 2815.79 242.985   2
  -6   6  -1 2885.76 183.581   1
  -6   6  -2 293.056 62.9398   1
  -6   6  -2 316.489 44.0288   4
  -6   6  -2 251.355 81.1752   2
   6  -6   3 317.394 122.764   5
  -6   6  -3 567.505 94.5983   1
  -6   6  -3 496.003 62.9937   4
   6  -6   4 5546.10 393.933   5
   6  -6   5 2848.93 252.899   2
   6  -6   5 3060.17 291.422   5
   6  -6   6 10715.3 491.533   2
   6  -6   6 10283.2 521.252   5
   6  -6   7 1099.77 174.247   5
   6  -6   7 1208.98 176.017   2
   6  -6   8 1935.99 226.236   2
   6  -6   8 2198.91 238.496   5
   6  -6   9 467.717 112.946   5
   6  -6   9 487.750 124.619   2
   6  -6  10 463.220 107.059   5
   6  -6  10 566.803 135.201   2
   6  -6  11 227.943 98.1934   2
   6  -6  11 225.696 77.2729   5
   6  -6  12 646.200 152.502   2
   6  -6  12 762.310 124.670   5
   6  -6  13 117.665 84.8083   2
   6  -5 -15 50.5923 49.9821   3
   6  -5 -14 22.3457 49.9305   3
  -6   5  13-43.0438 44.1352   2
   6  -5 -13-72.5502 61.4152   3
   6  -5 -12 1859.52 200.578   3
   6  -5 -12 2076.46 183.287   5
  -6   5  12 2141.60 198.835   2
   6  -5 -11 50.9584 44.6370   5
  -6   5  11-4.50019 25.9711   2
   6  -5 -11 3.01365 43.6976   3
   6  -5 -10 22.5604 49.9429   5
  -6   5  10 20.8272 34.2617   2
   6  -5 -10 22.8032 45.8281   3
   6  -5  -9 1572.30 174.438   3
   6  -5  -9 1409.63 181.289   5
   6  -5  -8 936.008 155.354   5
   6  -5  -8 782.279 128.483   3
  -6   5   7 364.855 82.1567   1
   6  -5  -7 241.007 71.5027   3
   6  -5  -6 2820.07 227.682   1
   6  -5  -6 3013.55 90.8794   4
  -6   5   6 2599.13 193.625   1
   6  -5  -5 43.6086 40.1656   1
  -6   5   5 8.07892 34.2871   1
   6  -5  -4 356.937 81.1736   1
  -6   5   4 382.971 76.3456   2
  -6   5   4 346.217 71.0376   1
  -6   5   3 11399.0 392.864   2
   6  -5  -3 11484.3 416.975   1
  -6   5   3 11070.4 367.221   1
  -6   5   2 325.184 68.2744   1
  -6   5   2 376.330 79.7027   2
  -6   5   1 1524.19 159.088   2
  -6   5   1 1572.89 140.636   1
  -6   5   0 131.525 50.6939   1
  -6   5   0 190.090 58.7588   2
  -6   5  -1 6604.09 353.831   2
  -6   5  -1 6343.33 285.118   1
  -6   5  -1 6065.40 133.661   4
  -6   5  -2 289.730 69.6208   1
  -6   5  -2 289.285 80.5842   2
   6  -5   3 562.787 112.182   2
  -6   5  -3 484.748 109.556   2
   6  -5   4 13.3047 58.2479   2
  -6   5  -4 59.1738 40.9455   2
   6  -5   5 1423.31 178.211   2
   6  -5   6 595.662 124.933   2
   6  -5   7 8354.31 449.493   2
   6  -5   8 504.543 124.003   2
   6  -5   8 257.513 99.2476   5
   6  -5   9 3921.28 332.737   2
   6  -5   9 3535.11 296.830   5
   6  -5  10 1616.65 196.692   5
   6  -5  10 1417.25 212.364   2
   6  -5  11 237.829 77.4933   5
   6  -5  11 149.215 91.1566   2
   6  -5  12 146.814 59.2148   5
   6  -5  12 133.518 75.1661   2
   6  -5  13-20.0308 60.6000   2
   6  -4 -15 338.456 106.236   3
   6  -4 -14 80.2088 61.4460   3
   6  -4 -13-90.6002 60.1664   3
   6  -4 -12 48.9312 42.9524   5
   6  -4 -12 31.2143 65.3980   3
   6  -4 -11-4.92188 41.8627   5
   6  -4 -11 73.6105 56.0760   3
   6  -4 -10 1870.85 207.338   3
  -6   4  10 1974.02 153.723   2
  -6   4   9 387.785 67.4391   2
   6  -4  -9 203.861 76.6881   3
  -6   4   8 126.541 54.1792   1
   6  -4  -8 54.8246 25.9578   4
   6  -4  -7 1096.16 75.4532   4
  -6   4   7 1056.83 129.145   1
  -6   4   6 660.926 79.4758   2
   6  -4  -6 658.854 112.887   1
  -6   4   6 628.353 99.3456   1
   6  -4  -6 651.910 50.1644   4
  -6   4   5 21.0434 28.6663   2
   6  -4  -5 2.57457 27.9420   1
  -6   4   5 34.9212 37.3494   1
  -6   4   4 5930.08 255.154   2
   6  -4  -4 6507.55 328.698   1
  -6   4   4 6308.07 288.538   1
  -6   4   3 240.898 67.1970   1
  -6   4   3 462.881 78.3332   2
  -6   4   2 447.795 85.3291   1
  -6   4   2 375.880 73.5933   2
  -6   4   1 1908.78 166.520   2
  -6   4   1 1942.24 164.926   1
  -6   4   0 1584.68 161.105   2
  -6   4   0 1884.51 162.616   1
  -6   4  -1 430.319 83.7021   1
   6  -4   1 453.229 86.9290   2
  -6   4  -1 519.218 99.0878   2
  -6   4  -2 8266.96 395.508   2
   6  -4   2 8461.71 356.710   2
   6  -4   3 482.833 99.1255   2
  -6   4  -3 528.346 109.454   2
  -6   4  -4 66.8592 54.5563   2
   6  -4   4 19.0772 50.8386   2
   6  -4   5 4148.66 293.970   2
   6  -4   6 576.938 125.905   2
   6  -4   7 4578.67 336.169   2
   6  -4   8 5824.46 396.393   2
   6  -4   9 239.556 94.0993   2
   6  -4  10 2469.62 280.760   2
   6  -4  11 1309.46 178.416   5
   6  -4  11 1233.50 209.167   2
   6  -4  12 742.673 122.228   5
   6  -4  12 721.085 161.996   2
   6  -4  13 352.554 131.081   2
   6  -4  14-184.598 100.823   2
   6  -3 -15 135.840 63.5698   3
   6  -3 -14 888.220 157.650   3
   6  -3 -13 187.559 82.0824   3
   6  -3 -12 47.0172 38.5142   4
  -6   3  12-0.29914 20.0624   2
   6  -3 -12-20.1013 44.2864   3
   6  -3 -11 1089.56 116.006   4
   6  -3 -11 907.783 152.603   3
  -6   3  11 1014.00 97.8958   2
   6  -3 -10 3155.27 180.989   4
   6  -3 -10 2895.68 264.558   3
  -6   3  10 2792.89 146.131   2
   6  -3  -9 5150.79 214.750   4
  -6   3   9 5193.94 186.862   2
  -6   3   9 5039.91 297.701   1
  -6   3   8 174.866 35.1727   2
  -6   3   8 103.326 57.1882   1
  -6   3   8 196.757 38.0232   2
   6  -3  -8 174.068 41.0300   4
  -6   3   7 39.5167 15.9168   2
  -6   3   7 77.9805 49.6078   1
   6  -3  -7-2.77764 18.0420   4
  -6   3   6 1795.99 110.321   2
   6  -3  -6 1875.82 190.775   1
  -6   3   6 1898.86 173.506   1
  -6   3   5 4043.43 176.038   2
   6  -3  -5 4055.98 271.617   1
  -6   3   5 4205.82 245.705   1
   6  -3  -4 587.216 103.046   1
  -6   3   4 489.623 88.9372   1
  -6   3   4 591.419 73.8448   2
  -6   3   3 1378.22 117.233   2
  -6   3   3 1561.23 154.395   1
  -6   3   2 13278.0 385.269   2
  -6   3   2 13324.2 436.391   1
  -6   3   1 1419.93 135.097   2
   6  -3  -1 1236.96 115.389   2
  -6   3   1 1280.63 140.048   1
  -6   3   1 1283.58 60.2243   4
  -6   3   0 5556.74 281.407   2
   6  -3   0 5905.88 263.443   2
  -6   3   0 6123.37 309.617   1
  -6   3  -1 18075.2 530.275   2
   6  -3   1 17148.2 482.820   2
  -6   3  -2 932.092 128.710   2
   6  -3   2 914.327 123.462   2
   6  -3   3 2567.80 216.113   2
  -6   3  -3 1654.96 183.126   2
  -6   3  -4 52.5132 42.0522   2
   6  -3   4-77.9378 64.8749   2
   6  -3   5 1256.35 170.195   2
  -6   3  -5 1112.27 159.698   2
   6  -3   6 3117.09 270.391   2
   6  -3   7 401.353 115.534   2
   6  -3   8 158.180 87.7096   2
   6  -3   9 1926.34 244.570   2
   6  -3  10 2013.97 254.014   2
   6  -3  11 420.684 128.708   2
   6  -3  12 1254.32 216.726   2
   6  -3  13 221.382 114.300   2
   6  -3  14 463.422 146.478   2
   6  -2 -17 133.149 71.0001   4
   6  -2 -16 2603.31 246.854   4
   6  -2 -15 208.010 73.9521   4
   6  -2 -15 286.482 101.050   3
   6  -2 -14 373.938 88.1513   4
   6  -2 -14 529.302 128.953   3
   6  -2 -13 1644.39 165.967   4
   6  -2 -13 1429.61 198.306   3
   6  -2 -12 299.668 71.9449   4
   6  -2 -12 160.619 80.7098   3
   6  -2 -11 332.795 75.5118   5
   6  -2 -11 328.041 70.7360   4
   6  -2 -11 195.274 86.7682   3
  -6   2  10 58.6953 48.2203   1
   6  -2 -10 11.6003 25.6177   4
   6  -2 -10-35.3491 51.3573   3
   6  -2  -9 1720.52 135.527   4
  -6   2   9 1877.98 186.407   1
   6  -2  -8 625.445 78.7465   4
  -6   2   8 630.034 111.325   1
   6  -2  -7 8502.86 267.686   4
  -6   2   7 7651.70 350.047   1
  -6   2   6 4572.28 264.379   1
   6  -2  -5 188.441 62.7419   1
  -6   2   5 127.083 53.0841   1
  -6   2   5 183.884 23.7164   2
  -6   2   4 7.05387 14.9722   2
  -6   2   4 25.4879 34.2840   1
  -6   2   3 152.507 36.4662   2
  -6   2   3 92.2580 50.7103   1
   6  -2  -2 1301.95 102.230   2
  -6   2   2 1274.85 78.7559   4
  -6   2   2 1285.17 107.572   2
   6  -2  -1 1245.77 112.174   2
  -6   2   1 1346.70 120.806   2
   6  -2   0 2230.75 164.977   2
  -6   2   0 2422.39 202.237   1
  -6   2   0 2377.52 172.303   2
   6  -2   1 2620.09 196.259   2
  -6   2  -1 2699.83 193.778   2
  -6   2  -2 130.927 50.5950   2
   6  -2   2 36.4795 44.5213   2
  -6   2  -3 1002.20 135.156   2
   6  -2   3 721.617 119.394   2
   6  -2   4 3097.07 250.778   2
  -6   2  -4 3033.83 241.394   2
  -6   2  -5 300.285 80.7947   2
   6  -2   5 145.956 71.1636   2
   6  -2   6 971.235 154.523   2
   6  -2   7 136.720 80.1309   2
   6  -2   8 113.846 81.6983   2
   6  -2   9 3137.18 310.641   2
   6  -2  10 31.5361 36.3487   5
   6  -2  10 64.9196 73.5343   2
   6  -2  11 41.0414 64.3735   2
   6  -2  12-91.0166 78.1271   2
   6  -2  13-179.314 96.4445   2
   6  -1 -17-36.9627 48.0776   4
   6  -1 -16 21.3906 43.6783   4
   6  -1 -15 355.534 96.2139   4
   6  -1 -15 362.184 112.163   3
   6  -1 -14 4459.78 300.667   4
   6  -1 -14 4123.84 350.107   3
   6  -1 -13 3686.79 258.778   4
   6  -1 -13 3412.93 315.447   3
   6  -1 -12 193.967 67.4037   4
   6  -1 -12 390.781 124.490   3
   6  -1 -11 1081.16 129.367   4
   6  -1 -11 929.049 171.008   3
   6  -1 -11 1166.07 142.281   5
  -6   1  10 921.729 139.895   1
   6  -1 -10 816.499 117.211   5
   6  -1 -10 759.144 103.191   4
   6  -1  -9 642.716 105.204   5
   6  -1  -9 762.467 100.023   4
  -6   1   9 673.542 114.274   1
   6  -1  -8 1083.33 134.868   5
  -6   1   8 927.084 129.988   1
   6  -1  -8 1020.82 110.382   4
  -6   1   7 582.721 107.205   1
  -6   1   6 4364.52 266.089   1
  -6   1   5 1467.91 154.880   1
  -6   1   4 10781.1 416.488   1
   6  -1  -3 0.22998 16.6735   2
  -6   1   3-11.0149 19.8941   4
   6  -1  -2 3979.99 180.517   2
  -6   1   2 3774.74 170.266   4
  -6   1   2 3775.79 168.342   2
  -6   1   1 72.6013 32.7845   2
   6  -1  -1 15.2060 29.3416   2
  -6   1   0 116.979 42.8082   2
   6  -1   0 75.5524 43.4813   2
   6  -1   1 4004.85 243.251   2
  -6   1  -1 3836.64 224.702   2
   6  -1   2 1613.75 169.361   2
  -6   1  -2 1706.02 160.112   2
  -6   1  -3 324.085 78.3660   2
   6  -1   3 230.750 79.0953   2
   6  -1   4 3597.99 271.573   2
  -6   1  -4 3624.16 258.141   2
   6  -1   5 4026.95 300.557   2
  -6   1  -5 4346.86 296.250   2
   6  -1   6 1104.44 169.270   2
   6  -1   7 290.868 74.9158   5
   6  -1   7 342.866 112.885   2
   6  -1   8 539.543 99.1392   5
   6  -1   8 531.683 133.647   2
   6  -1   9 286.456 73.6594   5
   6  -1   9 126.559 82.5958   2
   6  -1  10 2918.42 317.022   2
   6  -1  10 2677.48 215.889   5
   6  -1  11 5.80336 79.5288   2
   6  -1  12 23.8503 71.2437   2
   6  -1  13 140.067 103.044   2
   6   0 -17 273.728 100.607   4
   6   0 -16 46.2356 45.1930   4
   6   0 -15 43.6388 49.7967   4
   6   0 -14 155.846 78.4666   4
   6   0 -14 49.5119 65.1168   3
   6   0 -13 280.942 75.3558   4
   6   0 -13 413.683 124.978   3
   6   0 -12 33.5218 37.3147   4
   6   0 -12 56.4774 89.4289   3
   6   0 -11 6147.40 323.685   4
   6   0 -11 6065.76 438.813   3
  -6   0  11 6248.97 359.118   1
   6   0 -11 6097.27 336.490   5
   6   0 -10 86.2005 53.1555   5
  -6   0  10 55.5494 56.6476   1
   6   0 -10 70.2192 45.9710   4
   6   0  -9 1117.57 141.229   5
   6   0  -9 1294.31 138.663   4
  -6   0   9 1289.74 158.715   1
   6   0  -8 23.2884 31.7293   5
  -6   0   8-55.9676 48.1795   1
   6   0  -7 75.3223 45.6495   5
  -6   0   7 87.0381 42.2569   1
  -6   0   6 615.582 108.471   1
   6   0  -6 632.884 104.306   5
   6   0  -5 1009.82 133.221   5
  -6   0   5 860.488 126.945   1
   6   0  -4 16.1254 11.9432   2
   6   0  -4 17.1065 30.7067   5
  -6   0   4 66.1733 32.0587   4
  -6   0   4-18.2596 53.9965   1
   6   0  -3 1417.58 155.745   5
   6   0  -3 1457.51 101.647   2
  -6   0   3 1581.00 173.253   1
  -6   0   3 1320.22 112.365   4
  -6   0   2 61.9489 50.4364   1
   6   0  -2 53.1182 47.4143   5
  -6   0   2-1.83696 32.3314   4
   6   0  -2 21.0753 29.6300   2
   6   0  -1 16779.6 526.279   5
   6   0  -1 16755.9 440.966   2
  -6   0   1 16643.8 559.658   1
   6   0   0 1686.27 167.921   5
   6   0   0 1939.09 166.580   2
   6   0   1 2386.19 199.735   5
   6   0   1 2759.46 206.446   2
   6   0   2 11505.7 443.381   5
   6   0   2 11620.9 445.740   2
  -6   0  -2 12335.6 428.444   2
  -6   0  -3 277.427 75.3655   2
   6   0   3 99.6851 50.5726   5
   6   0   3 117.278 58.7561   2
   6   0   4 1391.79 157.771   5
   6   0   4 1106.41 158.339   2
  -6   0  -4 1134.54 145.285   2
   6   0   5 4081.31 272.858   5
   6   0   5 3775.39 298.920   2
   6   0   6 1420.57 193.959   2
   6   0   6 1337.48 161.213   5
   6   0   7 2401.31 261.432   2
   6   0   7 2493.14 218.180   5
   6   0   8 1566.98 222.390   2
   6   0   8 1250.14 157.440   5
   6   0   9 385.795 93.0921   5
   6   0   9 382.924 128.231   2
   6   0  10 40.4187 70.1524   2
   6   0  11 127.384 96.9977   2
   6   0  12 681.697 173.762   2
   6   0  13 925.301 207.786   2
   6   1 -16 341.665 114.996   4
   6   1 -15 111.376 60.0627   4
   6   1 -14 132.326 68.9972   4
   6   1 -14 206.341 101.596   3
   6   1 -13-110.685 64.9083   4
   6   1 -13-138.116 90.3794   3
   6   1 -12-97.5865 72.6605   4
   6   1 -12-71.5712 96.8178   3
   6   1 -11 1032.13 143.747   4
  -6  -1  11 754.922 133.394   1
  -6  -1  10 1644.21 183.830   1
  -6  -1   9 67.1536 52.8980   1
  -6  -1   8 3045.03 237.570   1
  -6  -1   7 535.183 101.259   1
  -6  -1   6 1178.74 153.344   1
  -6  -1   5 8392.51 312.444   4
  -6  -1   5 9020.16 404.814   1
   6   1  -4 1955.74 107.463   2
  -6  -1   4 1957.22 153.106   4
  -6  -1   4 1857.94 188.042   1
   6   1  -3 3780.23 179.498   2
  -6  -1   3 4103.68 278.807   1
  -6  -1   3 3675.46 213.716   4
  -6  -1   2 8702.35 412.510   1
  -6  -1   2 9386.79 351.188   4
   6   1  -2 8905.72 308.587   2
  -6  -1   1 1079.42 150.750   1
   6   1  -1 842.332 106.943   2
   6   1   0 2802.29 203.195   2
   6   1   1 981.773 129.623   2
   6   1   2 2002.66 194.525   2
   6   1   3 6692.15 368.162   2
   6   1   4 2685.14 249.320   2
   6   1   5 2420.89 248.024   2
   6   1   6 135.615 75.0300   2
   6   1   7 1969.41 242.275   2
   6   1   8 2807.43 298.474   2
   6   1   9 674.832 167.047   2
   6   1  10-14.6252 53.2116   2
   6   1  11 634.246 171.316   2
   6   1  12 1092.59 218.448   2
   6   2 -15 237.079 93.6957   4
   6   2 -14 225.912 83.0149   4
   6   2 -14 187.507 94.0718   3
   6   2 -13 156.465 97.5418   3
   6   2 -12 6.45500 59.3456   3
  -6  -2  11 2585.53 236.131   1
  -6  -2  10 7.02152 46.3256   1
  -6  -2   9 1386.11 167.548   1
  -6  -2   8 888.340 131.878   1
  -6  -2   7 2428.65 212.670   1
  -6  -2   6 279.468 81.5167   1
   6   2  -5 79.7950 23.5258   2
  -6  -2   5 67.5900 52.7048   1
  -6  -2   4 771.980 131.448   1
   6   2  -4 884.523 85.5232   2
  -6  -2   3 1303.62 161.941   1
  -6  -2   3 1336.53 141.774   4
   6   2  -3 1499.94 126.036   2
  -6  -2   2 16849.0 589.367   1
  -6  -2   2 16291.6 506.188   4
   6   2  -2 17028.5 458.130   2
  -6  -2   1 6515.67 368.330   1
   6   2  -1 6829.71 313.976   2
   6   2   0 22535.9 603.816   2
   6   2   1 2002.90 195.872   2
   6   2   2 30.0938 51.0598   2
   6   2   3 19.0104 52.3322   2
   6   2   4 1019.66 163.315   2
   6   2   5-125.963 71.8261   2
   6   2   6 46.0376 71.9179   2
   6   2   7 3058.06 312.890   2
   6   2   8-58.1940 60.8188   2
   6   2   9 85.1418 82.7122   2
   6   2  10 311.889 124.888   2
   6   2  11 48.1581 59.0834   2
   6   3 -13 641.216 167.796   3
   6   3 -12 501.349 151.900   3
  -6  -3  11-40.2560 60.0854   1
  -6  -3  10 296.278 86.9048   1
  -6  -3   9 1715.38 186.580   1
  -6  -3   8 1126.04 150.428   1
  -6  -3   7 39.0679 52.1393   1
  -6  -3   6 4976.90 312.278   1
   6   3  -6 5318.98 184.353   2
   6   3  -5 5.56223 20.6287   2
  -6  -3   5-34.0979 51.2232   1
   6   3  -4 56.3566 32.6852   2
  -6  -3   4 13.8200 48.8708   1
  -6  -3   3 1954.33 204.196   1
   6   3  -3 1949.20 159.867   2
  -6  -3   2 465.517 106.444   1
   6   3  -2 539.723 92.9133   2
  -6  -3   1-36.7730 56.6579   1
   6   3  -1-32.9195 41.2136   2
   6   3   0 2870.89 231.658   2
   6   3   1 3182.27 257.318   2
   6   3   2 751.712 137.314   2
   6   3   3 1265.72 178.224   2
   6   3   4 115.478 85.7660   2
   6   3   5 47.6920 60.6776   2
   6   3   6 1059.92 193.798   2
   6   3   7 1025.05 193.316   2
   6   3   8-13.4976 69.4974   2
   6   3   9 43.0031 89.5316   2
   6   3  10 2050.71 294.508   2
   6   4 -12 190.223 109.694   3
  -6  -4  11 404.924 99.5112   1
  -6  -4  10-1.82813 31.0742   1
  -6  -4   9 66.3744 50.9165   1
  -6  -4   8-35.7325 44.2854   1
  -6  -4   7-32.4033 43.4050   1
  -6  -4   6 724.877 122.762   1
   6   4  -5 123.141 42.6884   2
  -6  -4   5 170.419 67.3234   1
   6   4  -4 342.180 74.8675   2
  -6  -4   4 415.650 101.357   1
   6   4  -3 260.378 73.2225   2
  -6  -4   3 125.479 50.8150   1
  -6  -4   2 652.256 127.062   1
   6   4  -2 741.122 117.602   2
  -6  -4   1 187.876 75.9098   1
   6   4  -1 233.219 74.1293   2
   6   4   0 611.541 119.849   2
   6   4   1 889.448 152.371   2
   6   4   2 171.620 79.4457   2
   6   4   3 1257.26 191.122   2
   6   4   4 171.104 86.0505   2
   6   4   5 737.011 161.531   2
   6   4   6 397.529 130.656   2
   6   4   7 110.858 82.2083   2
   6   4   8 187.708 98.4444   2
   6   4   9 136.442 90.3545   2
  -6  -5  11 1267.28 167.516   1
   6   5 -11 1530.33 277.858   3
  -6  -5  10 70.3493 51.6312   1
  -6  -5   9 56.3645 51.0221   1
  -6  -5   8 1023.66 147.935   1
  -6  -5   7-28.6596 40.6134   1
  -6  -5   6 825.297 135.081   1
  -6  -5   5 22.8618 42.7907   1
   6   5  -4 15.0122 26.8938   2
  -6  -5   4-20.4878 41.9159   1
   6   5  -3 1112.26 147.141   2
  -6  -5   3 1342.96 176.288   1
  -6  -5   2 1209.29 172.742   1
   6   5  -2 1285.97 167.970   2
  -6  -5   1 150.580 68.9174   1
   6   5  -1 201.318 83.7482   2
  -6  -5   0 1862.22 218.387   1
   6   5   0 1763.68 213.148   2
   6   5   1 331.395 100.496   2
   6   5   2 1047.10 178.974   2
   6   5   3 212.037 99.1296   2
   6   5   4-39.3873 64.2257   2
   6   5   5 346.015 114.017   2
   6   5   6 78.4380 90.2279   2
   6   5   7 308.315 102.741   2
  -6  -6   9 231.625 78.6682   1
  -6  -6   8 6.60791 35.2865   1
  -6  -6   7 683.122 120.962   1
  -6  -6   6 255.104 82.7759   1
  -6  -6   5 1783.17 197.855   1
  -6  -6   4 243.145 79.2128   1
   6   6  -3 216.160 72.3028   2
  -6  -6   3-22.3819 35.4405   1
   6   6  -2 298.183 93.0318   2
  -6  -6   2 102.831 63.0401   1
  -6  -6   1 548.783 125.297   1
   6   6  -1 527.184 124.340   2
  -6  -6   0 182.346 76.2376   1
   6   6   0 158.103 77.9044   2
  -6  -6  -1 2106.51 242.881   1
   6   6   1 2426.96 279.669   2
   6   6   2 2307.61 281.965   2
   6   6   3 2519.82 302.560   2
   6   6   4 102.342 84.0592   2
   6   6   5 121.483 76.6789   2
   6   6   6 70.4324 75.1463   2
  -6  -7   3 602.685 123.688   1
  -6  -7   2 498.158 123.690   1
   6   7  -1-109.755 70.6394   2
  -6  -7   1-16.5140 40.1160   1
  -6  -7   0 15.0730 43.5542   1
   6   7   0 64.8927 64.9537   2
  -6  -7  -1 206.181 74.0722   1
   6   7   1 185.363 92.7365   2
   6   7   2 125.830 79.4789   2
   6   7   3 726.767 185.484   2
   7 -11  -9-34.7753 52.2713   5
   7 -11  -8 317.353 110.812   5
   7 -11  -7-207.836 97.9630   5
   7 -11  -6 132.664 78.5728   5
   7 -11  -5-2.34296 50.0968   5
   7 -11  -4 156.632 85.8946   5
   7 -11  -3-10.8008 72.2277   5
   7 -11  -2-29.8460 52.9963   5
   7 -11  -1 96.7020 83.2889   5
   7 -11   0 152.372 104.898   5
   7 -11   1 273.016 108.834   5
   7 -11   2 110.974 73.8697   5
   7 -11   3-27.9479 69.9606   5
   7 -11   4 178.504 99.5177   5
   7 -11   5-20.4860 63.6008   5
   7 -11   6-29.2015 55.8861   5
   7 -11   7 263.548 116.209   5
   7 -11   8 336.351 114.711   5
   7 -10 -10-11.1939 44.6162   5
   7 -10  -9 26.7969 55.7720   5
   7 -10  -8 434.444 117.980   5
   7 -10  -7 123.357 72.1975   5
   7 -10  -6 82.8018 69.2906   5
   7 -10  -5 272.134 101.270   5
   7 -10  -4 276.228 102.795   5
   7 -10  -3-45.2326 66.6210   5
   7 -10  -2 1182.70 192.126   5
   7 -10  -1 98.8976 82.8092   5
   7 -10   0 296.636 109.565   5
   7 -10   1 81.2669 63.4748   5
   7 -10   2 361.930 113.342   5
   7 -10   3-21.8798 57.5344   5
   7 -10   4 2707.49 293.796   5
   7 -10   5 638.624 151.977   5
   7 -10   6 528.175 138.393   5
   7 -10   7 1238.84 196.637   5
   7 -10   8 45.5704 69.5845   5
  -7  10  -8 16.1192 34.2666   4
   7 -10   9 33.4950 63.4237   5
  -7  10  -9-15.2641 40.0079   4
   7 -10  10 288.398 107.546   5
  -7  10 -10 162.156 71.5001   4
   7 -10  11 97.5110 68.2167   5
  -7  10 -11 204.017 79.7790   4
   7  -9 -10 1666.73 207.867   5
   7  -9  -9 513.848 127.561   5
   7  -9  -8 15.5516 48.4488   5
   7  -9  -7-15.3708 45.2766   5
   7  -9  -6 942.647 162.377   5
   7  -9  -5 526.904 131.207   5
   7  -9  -5 439.576 62.8401   3
   7  -9  -4 60.2754 58.9357   5
   7  -9  -4-25.0984 24.4814   3
   7  -9  -3 710.722 151.769   5
   7  -9  -3 596.168 61.0821   3
   7  -9  -2 3447.77 136.844   3
   7  -9  -2 3610.54 325.100   5
   7  -9  -1 3082.52 127.810   3
   7  -9  -1 3835.85 335.126   5
   7  -9   0 414.569 114.115   5
  -7   9   0 270.480 51.8173   1
   7  -9   1 8.58962 51.8399   5
  -7   9  -1-1.62633 23.3933   1
   7  -9   2 158.044 78.2984   5
  -7   9  -2 66.4319 29.0112   1
   7  -9   3-13.8966 48.9072   5
  -7   9  -3 11.4236 20.1324   1
   7  -9   4 1594.28 221.264   5
   7  -9   5 133.294 85.4080   5
  -7   9  -6 3628.65 238.525   4
   7  -9   6 3158.46 311.143   5
   7  -9   7 471.112 125.869   5
  -7   9  -7 260.684 71.7029   4
   7  -9   8-20.4808 45.3381   5
  -7   9  -8 15.0433 28.1909   4
   7  -9   9 80.2250 66.7693   5
  -7   9  -9-20.9985 36.4260   4
   7  -9  10 12.3197 51.3452   5
  -7   9 -10-86.0688 51.2262   4
   7  -9  11-36.3997 50.7622   5
  -7   9 -11 51.2103 41.2473   4
  -7   9 -12 16.4454 51.2356   4
  -7   8  12 161.468 87.4254   2
   7  -8 -12 179.478 60.0476   3
   7  -8 -11 345.584 94.0425   5
   7  -8 -11 408.343 90.4885   3
   7  -8 -10 826.427 146.072   5
   7  -8 -10 733.154 110.596   3
   7  -8  -9 303.392 98.4075   5
   7  -8  -9 286.127 71.9398   3
   7  -8  -8 6531.60 304.685   3
   7  -8  -8 6756.65 413.270   5
   7  -8  -7 2315.48 176.719   3
   7  -8  -7 2630.42 266.170   5
   7  -8  -6-30.8640 64.0499   5
   7  -8  -6-22.9058 30.3885   3
   7  -8  -5 1070.48 174.848   5
   7  -8  -4 490.785 131.827   5
   7  -8  -3 415.505 117.773   5
  -7   8   3 450.797 82.4515   1
   7  -8  -2 177.704 86.1130   5
  -7   8   2 129.308 50.5841   1
   7  -8  -1 40.1211 72.1730   5
  -7   8   1 89.2306 38.8158   1
   7  -8   0 856.377 170.554   5
  -7   8   0 750.878 91.1770   1
  -7   8  -1 4136.63 210.477   1
   7  -8   1 3900.55 341.683   5
  -7   8  -2 10071.5 330.938   1
   7  -8   2 9102.71 521.557   5
   7  -8   3 65.7838 90.4325   5
  -7   8  -3-20.3318 44.6423   1
  -7   8  -4 6175.42 276.767   1
   7  -8   4 6441.80 438.445   5
  -7   8  -5 1225.79 130.368   1
  -7   8  -5 1219.20 122.399   4
   7  -8   6 956.928 175.097   5
  -7   8  -6 1082.00 130.207   1
  -7   8  -6 1020.56 120.540   4
   7  -8   7 102.917 70.2018   5
  -7   8  -7-8.33963 26.1563   4
   7  -8   8 893.490 166.372   5
  -7   8  -8 610.739 103.711   4
   7  -8   9 232.111 88.4751   5
  -7   8  -9 267.343 78.3660   4
   7  -8  10 699.754 144.010   5
  -7   8 -10 865.337 131.252   4
   7  -8  11 174.655 79.3321   5
  -7   8 -11 278.612 82.3359   4
   7  -8  12-1.86417 42.8781   5
  -7   8 -12-63.7364 55.7098   4
  -7   8 -13 249.039 84.2700   4
   7  -7 -14 773.995 138.357   3
   7  -7 -13 297.055 91.9345   3
   7  -7 -12-90.4913 45.1053   3
   7  -7 -11 60.5752 60.8205   5
   7  -7 -11 102.026 57.6560   3
   7  -7 -10 147.197 69.8013   5
   7  -7 -10-15.7061 42.6649   3
   7  -7  -9 155.140 79.1581   5
   7  -7  -9 23.2927 40.6604   3
   7  -7  -8 1.48065 50.4767   5
   7  -7  -8 39.9481 39.7050   3
   7  -7  -7 2976.26 225.933   3
   7  -7  -7 3492.99 308.868   5
   7  -7  -6 5148.85 288.603   3
   7  -7  -6 5054.28 374.386   5
  -7   7   5 10088.3 439.643   2
   7  -7  -5 10696.6 547.330   5
  -7   7   5 11428.7 408.149   1
   7  -7  -4 999.567 181.348   5
  -7   7   4 1030.10 142.957   2
   7  -7  -4 1186.17 150.195   1
  -7   7   4 1053.42 123.369   1
   7  -7  -3 202.339 103.936   5
  -7   7   3 140.558 67.2081   2
  -7   7   3 89.4778 47.4896   1
  -7   7   2 1900.41 160.065   1
   7  -7  -2 2227.91 264.366   5
   7  -7  -1-11.7463 77.1856   5
  -7   7   1 12.7095 30.1400   1
   7  -7   0 1207.07 203.247   5
  -7   7   0 1158.40 124.778   1
  -7   7  -1 2104.50 168.221   1
   7  -7   1 2283.00 268.849   5
  -7   7  -2 14816.0 446.030   1
   7  -7   2 13678.6 651.746   5
   7  -7   3 109.026 99.9445   5
  -7   7  -3 101.606 51.3411   1
  -7   7  -3 73.1464 31.1831   4
  -7   7  -4 11902.9 423.791   1
   7  -7   4 10868.6 581.245   5
   7  -7   5 160.769 95.7240   5
  -7   7  -5 140.927 45.8356   4
  -7   7  -5 76.3917 49.0762   1
   7  -7   6 1141.49 195.023   5
  -7   7  -6 1353.76 127.399   4
   7  -7   7 721.694 156.094   5
   7  -7   8 8.50342 53.5614   5
   7  -7   8-42.4197 76.9912   2
   7  -7   9 335.678 100.840   5
   7  -7   9 171.768 99.7475   2
   7  -7  10 1407.03 198.518   5
   7  -7  10 1516.67 223.618   2
   7  -7  11-42.8137 52.5325   5
   7  -7  11 0.50845 71.6582   2
   7  -7  12 213.198 78.1023   5
   7  -6 -14 340.487 101.369   3
   7  -6 -13 53.1134 47.5257   3
   7  -6 -12 640.265 116.235   5
   7  -6 -12 535.608 115.122   3
   7  -6 -11 14.5860 48.8036   5
  -7   6  11 18.2899 26.8649   2
   7  -6 -11-15.2976 53.8362   3
   7  -6 -10 156.425 68.5142   5
   7  -6 -10 148.189 59.1279   3
   7  -6  -9 114.265 75.1778   5
   7  -6  -9 42.2274 47.2631   3
   7  -6  -8 196.220 80.8130   5
   7  -6  -8 204.610 28.8710   4
   7  -6  -8 75.4689 45.2013   3
   7  -6  -7 920.055 178.584   5
   7  -6  -7 1026.44 145.446   3
  -7   6   7 1115.53 140.590   1
  -7   6   6 872.714 119.681   2
  -7   6   6 865.215 122.419   1
  -7   6   5 31.4226 34.8062   2
  -7   6   5-16.0031 42.2417   1
  -7   6   4 9.10020 34.9415   1
  -7   6   4 43.5674 37.2952   2
   7  -6  -4-26.0472 41.0641   1
  -7   6   3 4765.56 290.831   2
  -7   6   3 4488.31 251.769   1
  -7   6   2 1707.79 182.011   2
  -7   6   2 1621.70 152.373   1
  -7   6   1 2903.64 241.116   2
  -7   6   1 2500.42 189.159   1
  -7   6   0 7549.17 403.243   2
  -7   6   0 6990.59 319.018   1
  -7   6  -1-3.19975 44.2329   1
  -7   6  -1-1.35317 37.2900   2
  -7   6  -2 2609.40 205.475   1
  -7   6  -2 2629.48 110.796   4
  -7   6  -3 976.882 132.884   1
  -7   6  -3 1149.11 87.1971   4
   7  -6   5 7271.51 415.793   2
   7  -6   6 769.440 148.309   2
   7  -6   7 1878.18 225.167   2
   7  -6   7 2140.13 263.250   5
   7  -6   8 258.251 99.7495   5
   7  -6   8 129.206 78.1593   2
   7  -6   9 358.391 109.708   5
   7  -6   9 480.533 135.216   2
   7  -6  10 594.027 135.350   5
   7  -6  10 682.985 154.890   2
   7  -6  11 30.7266 62.3877   5
   7  -6  11 86.2420 84.3154   2
   7  -6  12 116.320 93.9901   2
   7  -6  12 97.2373 61.8056   5
   7  -5 -14-114.922 71.5399   3
   7  -5 -13 337.106 96.2031   3
   7  -5 -12 213.106 72.7928   5
   7  -5 -12 394.967 102.747   3
   7  -5 -11-4.91066 44.5003   5
   7  -5 -11 37.9428 29.4535   4
   7  -5 -10 59.5831 27.3419   4
   7  -5 -10-3.03062 44.1943   3
   7  -5  -9 1267.03 91.8364   4
   7  -5  -9 1185.67 168.773   3
  -7   5   8 2619.05 180.517   2
   7  -5  -8 3011.79 120.805   4
  -7   5   8 2967.88 235.063   1
  -7   5   7 963.653 110.973   2
  -7   5   7 1134.62 144.528   1
  -7   5   6 2246.63 170.746   2
  -7   5   6 1915.55 180.804   1
  -7   5   5 269.523 79.6526   1
  -7   5   5 245.756 63.5751   2
  -7   5   4 155.743 63.8840   1
  -7   5   4 157.903 54.1104   2
  -7   5   3 2166.49 188.093   2
  -7   5   3 2477.58 194.386   1
  -7   5   2 6905.72 342.554   2
  -7   5   2 7278.78 334.735   1
  -7   5   1 6072.71 333.561   2
  -7   5   1 6060.24 308.184   1
  -7   5   0 42580.4 920.930   2
  -7   5   0 43326.1 821.795   1
  -7   5  -1 879.442 126.420   1
  -7   5  -1 1124.09 158.557   2
  -7   5  -2 5071.17 342.305   2
  -7   5  -2 4815.13 287.571   1
   7  -5   2 4571.09 290.211   2
   7  -5   3 5937.77 341.692   2
   7  -5   4 395.673 102.918   2
   7  -5   5 186.081 85.1447   2
   7  -5   6 12412.0 551.972   2
   7  -5   7 1206.72 184.635   2
   7  -5   8 4094.33 342.145   2
   7  -5   9 1563.89 226.817   2
   7  -5  10 44.9010 60.9677   5
   7  -5  10 73.6532 87.7834   2
   7  -5  11-132.459 71.9074   5
   7  -5  11-69.8736 82.3675   2
   7  -5  12-27.1038 42.1886   5
   7  -5  12 7.12818 71.4526   2
   7  -4 -14 331.302 100.856   3
   7  -4 -13-13.0927 51.9767   3
   7  -4 -12 266.251 61.5819   4
   7  -4 -12 205.659 83.4643   3
   7  -4 -11 562.518 80.5886   4
   7  -4 -11 517.140 132.911   3
  -7   4  10 101.103 35.1547   2
   7  -4 -10 129.107 40.4837   4
   7  -4 -10 154.320 76.3887   3
  -7   4   9-16.8088 22.0840   2
  -7   4   9 8.36590 17.6067   2
   7  -4  -9 7.43121 20.0954   4
  -7   4   9 40.0320 47.3762   1
  -7   4   8 174.208 63.4338   1
   7  -4  -8 287.722 47.1202   4
  -7   4   8 290.516 53.6977   2
  -7   4   7 1363.89 113.101   2
  -7   4   7 1558.38 166.968   1
  -7   4   6-4.65388 47.8421   1
  -7   4   6 22.4922 28.3221   2
  -7   4   5 1595.84 134.327   2
  -7   4   5 1807.36 173.197   1
  -7   4   4 168.669 66.7114   1
  -7   4   4 207.057 55.5963   2
  -7   4   3 132.657 39.5651   2
  -7   4   3 61.7127 43.4474   1
  -7   4   2 13961.5 454.408   2
  -7   4   2 14550.6 489.012   1
  -7   4   1 4305.55 267.873   2
  -7   4   1 4776.02 283.799   1
  -7   4   0 2415.84 209.931   2
  -7   4   0 2449.89 209.885   1
  -7   4  -1 5825.39 337.321   2
   7  -4   1 5600.79 297.451   2
  -7   4  -1 5900.69 328.986   1
   7  -4   2 271.212 77.4153   2
  -7   4  -2 160.962 61.7489   2
  -7   4  -3 1312.46 178.073   2
   7  -4   3 1023.26 144.389   2
   7  -4   4 45.8764 55.1543   2
   7  -4   5 2475.50 239.862   2
   7  -4   6 5430.64 370.129   2
   7  -4   7 6434.18 417.258   2
   7  -4   8 3051.20 300.411   2
   7  -4   9 1655.21 233.577   2
   7  -4  10 426.159 137.448   2
   7  -4  11-0.52065 80.9240   2
   7  -4  12 384.513 109.414   5
   7  -4  12 704.406 168.977   2
   7  -4  13 161.863 103.630   2
   7  -3 -14-50.7632 63.6031   3
   7  -3 -13 2051.09 176.750   4
   7  -3 -13 1948.63 239.978   3
   7  -3 -12-3.83279 28.3180   4
   7  -3 -12-34.4776 56.6250   3
   7  -3 -11 730.047 97.4673   4
   7  -3 -11 641.509 144.689   3
   7  -3 -10 2740.53 173.180   4
  -7   3  10 2746.72 242.062   1
  -7   3   9 887.085 139.138   1
   7  -3  -9 793.579 89.5510   4
  -7   3   8 7453.01 371.829   1
  -7   3   7 705.026 42.6086   2
  -7   3   7 677.443 113.505   1
  -7   3   7 720.538 49.8995   2
  -7   3   6 160.371 67.0204   1
  -7   3   6 167.679 34.6485   2
  -7   3   5 4380.12 181.985   2
  -7   3   5 4498.07 280.448   1
  -7   3   4 3712.37 186.493   2
  -7   3   4 3765.97 257.880   1
  -7   3   3 2251.22 155.931   2
  -7   3   3 1834.26 182.656   1
  -7   3   2 12771.4 202.879   4
  -7   3   2 12357.9 391.829   2
   7  -3  -1 603.080 88.6651   2
  -7   3   1 633.820 114.049   1
  -7   3   1 629.682 53.4667   4
  -7   3   1 712.091 102.070   2
   7  -3   0 9062.17 353.473   2
  -7   3   0 9398.12 423.561   1
  -7   3   0 9733.54 388.405   2
   7  -3   1 1577.27 161.631   2
  -7   3  -1 1426.50 170.675   1
  -7   3  -1 1317.77 153.887   2
   7  -3   2 1886.51 186.621   2
  -7   3  -2 1657.56 179.245   2
   7  -3   3 2753.56 236.304   2
  -7   3  -3 2720.51 236.855   2
   7  -3   4 2641.84 240.954   2
  -7   3  -4 2475.41 236.325   2
   7  -3   5 282.790 93.7754   2
   7  -3   6 820.274 154.787   2
   7  -3   7 150.295 83.2236   2
   7  -3   8 151.744 86.1713   2
   7  -3   9 2391.59 279.216   2
   7  -3  10 166.977 90.1251   2
   7  -3  11 3.21590 58.4328   2
   7  -3  12 183.140 105.507   2
   7  -2 -14 124.528 56.3029   4
   7  -2 -14-18.6226 58.8367   3
   7  -2 -13-51.6792 41.5594   4
   7  -2 -13-53.0473 83.0295   3
   7  -2 -12 817.364 114.200   4
   7  -2 -12 665.298 150.379   3
   7  -2 -11 652.016 98.3327   4
  -7   2  11 581.820 118.930   1
   7  -2 -11 468.135 132.724   3
   7  -2 -10 352.242 68.9904   4
  -7   2  10 258.829 83.0581   1
  -7   2   9 2946.24 242.346   1
  -7   2   8-18.1941 62.0762   1
  -7   2   7-16.7875 37.4069   1
  -7   2   6 4648.61 292.325   1
  -7   2   5 629.780 110.913   1
  -7   2   4 368.923 47.2071   2
  -7   2   4 191.219 73.9605   1
  -7   2   3 3501.61 144.204   4
  -7   2   3 4015.12 278.715   1
  -7   2   3 3685.75 175.347   2
   7  -2  -2 95.5919 38.9556   2
  -7   2   2 61.4752 52.8178   1
  -7   2   2 60.4483 36.4546   2
  -7   2   2 36.0722 16.5651   4
  -7   2   1 334.028 93.8269   1
  -7   2   1 272.559 54.1939   2
   7  -2  -1 448.353 78.4286   2
  -7   2   0 292.313 84.5391   1
  -7   2   0 360.804 72.9430   2
   7  -2   0 322.277 72.0787   2
  -7   2  -1 653.532 103.859   2
   7  -2   1 638.745 109.203   2
  -7   2  -2 26.1861 36.4819   2
   7  -2   2 46.8049 55.9309   2
  -7   2  -3 22.5958 31.5134   2
   7  -2   3 31.4073 49.8804   2
   7  -2   4 2497.59 240.468   2
  -7   2  -4 2724.98 240.091   2
   7  -2   5-34.0305 71.1485   2
   7  -2   6 357.050 108.802   2
   7  -2   7 849.663 163.145   2
   7  -2   8 69.3963 71.1864   2
   7  -2   9 273.208 110.777   2
   7  -2  10 2444.16 298.330   2
   7  -2  11-41.1010 53.8457   2
   7  -2  12 80.7230 109.642   2
   7  -1 -15-6.47596 55.3194   4
   7  -1 -14 97.5953 55.7162   4
   7  -1 -14 106.116 66.5787   3
   7  -1 -13 118.867 61.4441   4
   7  -1 -13-9.39322 94.9398   3
   7  -1 -12 1686.06 173.939   4
   7  -1 -12 1975.04 263.019   3
   7  -1 -11-22.5675 35.0446   4
  -7   1  11-44.9297 49.7949   1
  -7   1  10 435.072 101.429   1
  -7   1   9 552.982 112.692   1
  -7   1   8 167.881 69.0023   1
  -7   1   7 1412.71 167.321   1
  -7   1   6 3905.44 273.436   1
  -7   1   5 379.637 95.0969   1
  -7   1   4 3598.28 172.010   4
  -7   1   4 3685.17 273.368   1
   7  -1  -3 9772.56 261.176   2
  -7   1   3 9847.55 444.065   1
  -7   1   3 8788.22 277.887   4
   7  -1  -2 805.604 94.8287   2
  -7   1   2 696.758 130.741   1
  -7   1   2 700.327 83.6859   4
   7  -1  -1 1436.62 138.940   2
  -7   1   1 1440.72 180.785   1
  -7   1   1 1623.18 134.213   2
   7  -1   0 7649.30 341.008   2
  -7   1   0 7981.38 419.836   1
  -7   1   0 7215.89 307.334   2
  -7   1  -1 146.506 55.5817   2
   7  -1   1 108.676 60.4193   2
   7  -1   2 4352.69 290.908   2
  -7   1  -2 4143.65 265.850   2
  -7   1  -3 215.148 65.5395   2
   7  -1   3 152.511 76.1094   2
   7  -1   4 626.934 126.266   2
   7  -1   5 1510.70 202.418   2
   7  -1   6 4527.62 354.123   2
   7  -1   7 465.234 128.038   2
   7  -1   8 341.659 109.333   2
   7  -1   9 389.175 138.055   2
   7  -1  10 76.8517 92.6475   2
   7  -1  11 187.907 98.3611   2
   7  -1  12 743.185 185.162   2
   7   0 -15-81.7087 58.4824   4
   7   0 -14-137.147 71.1466   4
   7   0 -13-41.7515 46.5872   4
   7   0 -13 22.2649 72.7981   3
   7   0 -12 133.695 86.9654   3
  -7   0  12 428.289 111.841   1
  -7   0  11 369.212 101.595   1
  -7   0  10 405.305 102.863   1
  -7   0   9 49.4794 47.6476   1
  -7   0   8 645.595 121.081   1
  -7   0   7 5349.44 330.339   1
  -7   0   6 49.6070 50.5188   1
  -7   0   5 9036.34 433.076   1
   7   0  -4 384.856 40.3676   2
  -7   0   4 301.292 61.5186   4
  -7   0   4 227.575 76.3237   1
   7   0  -3 1722.86 122.638   2
  -7   0   3 1768.75 201.029   1
  -7   0   3 1544.16 135.456   4
   7   0  -2 18767.2 463.503   2
  -7   0   2 18006.9 628.757   1
  -7   0   2 17546.2 464.457   4
   7   0  -1 2634.93 194.237   2
  -7   0   1 2772.58 252.799   1
   7   0   0 1120.65 139.163   2
  -7   0   0 1051.98 161.273   1
   7   0   1 7091.59 359.933   2
   7   0   2 2064.63 207.243   2
   7   0   3 2045.99 218.275   2
   7   0   4-15.2160 56.8803   2
   7   0   5-110.740 71.8759   2
   7   0   6-70.8083 79.7219   2
   7   0   7 662.844 156.065   2
   7   0   8 404.238 132.806   2
   7   0   9 248.972 112.001   2
   7   0  10 40.6224 83.8556   2
   7   0  11 1959.17 291.150   2
   7   1 -13-296.646 128.477   3
   7   1 -12 258.568 126.437   3
  -7  -1  12 266.336 89.4559   1
  -7  -1  11 310.775 96.7982   1
  -7  -1  10 227.261 81.7975   1
  -7  -1   9 274.734 81.8774   1
  -7  -1   8 3516.54 277.329   1
  -7  -1   7 105.447 65.9423   1
  -7  -1   6 47.2061 56.3179   1
  -7  -1   5 97.1321 44.3255   4
  -7  -1   5 38.1027 49.1421   1
   7   1  -4 5396.56 191.807   2
  -7  -1   4 5381.12 273.019   4
  -7  -1   4 5788.81 357.191   1
  -7  -1   3 652.842 129.609   1
  -7  -1   3 506.532 88.1134   4
   7   1  -3 512.648 78.5580   2
   7   1  -2 3335.60 208.783   2
  -7  -1   2 3096.90 269.952   1
  -7  -1   2 2876.55 209.838   4
  -7  -1   1 81.9683 68.6203   1
   7   1  -1 260.780 70.4858   2
   7   1   0 4258.23 268.953   2
   7   1   1 3863.93 273.571   2
   7   1   2 6240.66 368.409   2
   7   1   3-58.4062 68.7240   2
   7   1   4 1165.76 179.540   2
   7   1   5 432.081 120.176   2
   7   1   6 676.794 155.909   2
   7   1   7 305.198 114.560   2
   7   1   8 196.752 97.9716   2
   7   1   9 230.307 110.711   2
   7   1  10 440.566 153.313   2
   7   1  11 125.266 96.4127   2
  -7  -2  12 657.848 128.005   1
   7   2 -12 717.863 199.116   3
  -7  -2  11 444.112 107.576   1
  -7  -2  10 2.02048 34.1787   1
  -7  -2   9 1581.09 192.624   1
  -7  -2   8 118.125 61.8658   1
  -7  -2   7 694.451 126.831   1
  -7  -2   6 1179.76 166.766   1
   7   2  -5 44.3704 19.8662   2
  -7  -2   5-47.0273 59.3184   1
  -7  -2   4 94.6924 70.7160   1
   7   2  -4 192.334 50.3627   2
  -7  -2   3 2111.42 225.497   1
   7   2  -3 1727.43 145.915   2
  -7  -2   2-86.6422 63.8048   1
   7   2  -2 34.6969 37.3600   2
  -7  -2   1 1684.70 211.466   1
   7   2  -1 1813.72 175.027   2
   7   2   0 146.759 67.2458   2
  -7  -2   0 128.773 82.2024   1
   7   2   1 649.324 124.102   2
   7   2   2 3.03389 37.6418   2
   7   2   3 515.139 121.705   2
   7   2   4 292.363 94.5219   2
   7   2   5 1958.12 246.379   2
   7   2   6 381.746 120.889   2
   7   2   7-20.7132 67.4423   2
   7   2   8 42.1038 72.4338   2
   7   2   9 175.596 113.757   2
   7   2  10 249.286 129.617   2
  -7  -3  12 179.495 77.3967   1
  -7  -3  11 0.35439 44.0563   1
  -7  -3  10-12.7466 42.2465   1
  -7  -3   9 158.266 72.0544   1
  -7  -3   8 42.0902 49.7846   1
  -7  -3   7 32.3454 43.8689   1
  -7  -3   6 769.164 142.768   1
  -7  -3   5 23.9410 46.9161   1
  -7  -3   4 1668.29 204.951   1
   7   3  -4 1398.48 130.765   2
  -7  -3   3 1.79874 40.3538   1
   7   3  -3-13.3884 33.3011   2
  -7  -3   2 345.432 103.122   1
   7   3  -2 232.877 74.8766   2
  -7  -3   1 1107.99 169.226   1
   7   3  -1 978.705 137.438   2
   7   3   0 993.091 150.406   2
  -7  -3   0 939.558 165.885   1
   7   3   1 498.868 110.482   2
   7   3   2 1340.58 188.847   2
   7   3   3 247.177 98.0619   2
   7   3   4-3.57777 46.7522   2
   7   3   5 494.570 132.903   2
   7   3   6 1317.24 220.137   2
   7   3   7-195.708 71.6700   2
   7   3   8-0.60774 85.8092   2
   7   3   9 1432.15 253.887   2
  -7  -4  12 101.300 62.2885   1
  -7  -4  11 1228.37 175.551   1
  -7  -4  10 292.602 88.8504   1
  -7  -4   9 395.406 106.584   1
  -7  -4   8 934.928 148.859   1
  -7  -4   7 140.072 61.6745   1
  -7  -4   6 129.668 70.1227   1
  -7  -4   5 1551.35 195.803   1
  -7  -4   4 250.015 86.9070   1
  -7  -4   3 1078.65 171.618   1
   7   4  -3 1215.59 145.986   2
  -7  -4   2 619.491 140.883   1
   7   4  -2 568.657 111.729   2
  -7  -4   1 124.622 76.7008   1
   7   4  -1 96.5019 55.7218   2
  -7  -4   0 1592.07 217.407   1
   7   4   0 1712.13 206.927   2
   7   4   1-43.1475 45.4389   2
   7   4   2 1161.55 188.185   2
   7   4   3 2220.56 268.792   2
   7   4   4 174.991 98.7005   2
   7   4   5 31.9670 67.8861   2
   7   4   6-91.7697 81.2842   2
   7   4   7 115.469 92.0287   2
  -7  -5  11 86.7631 62.1434   1
  -7  -5  10 584.399 121.070   1
  -7  -5   9 65.0960 50.8630   1
  -7  -5   8-39.8193 47.3767   1
  -7  -5   7 1074.81 163.717   1
  -7  -5   6 238.976 82.6419   1
  -7  -5   5 964.377 160.430   1
  -7  -5   4 141.942 70.8041   1
  -7  -5   3 938.153 163.802   1
  -7  -5   2 633.649 139.572   1
   7   5  -2 616.058 124.955   2
  -7  -5   1 440.278 118.751   1
   7   5  -1 393.215 104.850   2
  -7  -5   0 74.8445 61.1585   1
   7   5   0 107.728 70.9314   2
   7   5   1 760.157 151.418   2
  -7  -5  -1 995.460 185.403   1
   7   5   2 583.652 148.184   2
   7   5   3 822.305 180.910   2
   7   5   4 180.530 102.845   2
   7   5   5 987.794 207.540   2
   7   5   6 1344.87 254.926   2
  -7  -6   7 153.402 75.6752   1
  -7  -6   6 874.828 146.751   1
  -7  -6   5 5.53250 38.4899   1
  -7  -6   4-42.0304 44.6429   1
  -7  -6   3 1688.55 217.591   1
  -7  -6   2 196.804 84.5716   1
  -7  -6   1-154.685 70.0291   1
  -7  -6   0 637.771 140.115   1
   7   6   0 745.284 161.172   2
  -7  -6  -1 17.7854 44.5056   1
   7   6   1-10.5772 50.8932   2
   7   6   2 450.810 147.674   2
  -7  -6  -2 535.334 139.306   1
   7   6   3 273.001 111.826   2
   7   6   4 153.514 104.685   2
   8 -11  -6 149.538 86.4377   5
   8 -11  -5-137.843 82.0306   5
   8 -11  -4 363.416 121.353   5
   8 -11  -3-15.9531 53.8788   5
   8 -11  -2 136.858 75.1303   5
   8 -11  -1-4.03714 45.5282   5
   8 -11   0 307.037 115.346   5
   8 -11   1-180.098 102.973   5
   8 -11   2 147.862 92.8847   5
   8 -11   3-49.7340 72.5203   5
   8 -11   4 59.9879 68.7478   5
   8 -11   5 121.603 99.0778   5
   8 -10 -10 116.179 82.5981   5
   8 -10  -9 141.433 78.0204   5
   8 -10  -8 433.754 126.474   5
   8 -10  -7-59.0819 56.6331   5
   8 -10  -6 449.473 124.715   5
   8 -10  -5 78.1088 67.6267   5
   8 -10  -4 129.213 97.2216   5
   8 -10  -3 194.274 82.3601   5
   8 -10  -2-75.5971 83.9199   5
   8 -10  -1 1035.04 189.305   5
   8 -10   0-49.3732 88.4799   5
   8 -10   1 8.30257 69.4428   5
   8 -10   2-6.41790 48.5193   5
   8 -10   3-196.417 98.8576   5
   8 -10   4 84.7735 58.3290   5
   8 -10   5 190.334 92.3560   5
   8 -10   6 438.300 133.601   5
   8 -10   7-7.09679 51.8509   5
   8 -10   8 108.372 79.7839   5
   8 -10   9 32.4004 47.6338   5
   8 -10  10 63.6754 58.5186   5
   8  -9 -10 428.815 112.781   5
   8  -9  -9 58.1310 74.5148   5
   8  -9  -8 521.152 126.834   5
   8  -9  -7 546.089 128.801   5
   8  -9  -6 152.584 98.2700   5
   8  -9  -5 1129.04 191.729   5
   8  -9  -5 1052.39 112.514   3
   8  -9  -4-61.2010 59.0849   5
   8  -9  -3 75.4120 74.0492   5
  -8   9   3 162.007 56.7999   1
   8  -9  -2 312.095 106.220   5
  -8   9   2 488.036 86.3427   1
   8  -9  -1 902.482 191.902   5
  -8   9   1 586.379 91.5159   1
  -8   9   0 2741.17 181.497   1
   8  -9   0 2601.41 294.916   5
   8  -9   1 93.6620 68.1123   5
  -8   9  -1 248.669 62.9631   1
   8  -9   2 167.225 102.116   5
  -8   9  -2 234.137 56.0606   1
   8  -9   3 918.609 182.230   5
  -8   9  -3 1207.00 123.918   1
   8  -9   4 641.697 152.452   5
   8  -9   5 283.282 109.700   5
   8  -9   6 895.230 183.936   5
  -8   9  -6 1011.45 122.875   4
   8  -9   7 540.610 145.835   5
  -8   9  -7 446.911 89.5135   4
   8  -9   8 1195.45 200.535   5
  -8   9  -8 1280.14 151.561   4
   8  -9   9-23.9166 53.9830   5
  -8   9  -9-93.6950 51.8264   4
   8  -9  10 66.9885 70.2983   5
  -8   9 -10 175.954 64.1843   4
   8  -9  11 194.053 86.4838   5
   8  -8 -12 609.723 117.756   3
   8  -8 -11 297.193 96.5369   5
   8  -8 -11 208.071 74.7222   3
   8  -8 -10 566.252 127.247   5
   8  -8 -10 416.717 96.9360   3
   8  -8  -9 208.671 85.5207   5
   8  -8  -9 258.390 74.1944   3
   8  -8  -8 1053.59 179.091   5
   8  -8  -8 839.972 127.197   3
   8  -8  -7 1825.54 179.658   3
   8  -8  -7 2099.18 258.426   5
   8  -8  -6 41.1146 65.6204   5
   8  -8  -6 21.6162 37.5988   3
   8  -8  -5 17.9775 64.2236   5
  -8   8   5 85.4651 56.1753   1
   8  -8  -4 117.213 93.1865   5
  -8   8   4 186.658 63.4475   1
   8  -8  -3 226.294 115.530   5
  -8   8   3 86.4510 43.7647   1
   8  -8  -2-43.0358 72.6754   5
  -8   8   2 10.8338 31.7286   1
   8  -8  -1 750.448 170.655   5
  -8   8   1 499.426 89.0185   1
   8  -8   0 217.729 124.157   5
  -8   8   0 20.6872 29.6282   1
   8  -8   1 294.734 122.525   5
  -8   8  -1 319.522 72.7243   1
   8  -8   2 52.7991 81.5371   5
  -8   8  -2-5.50138 38.2146   1
   8  -8   3 1533.28 245.267   5
  -8   8  -3 2315.23 193.155   1
   8  -8   4 136.682 90.8764   5
  -8   8  -4 511.182 100.676   1
   8  -8   5 17.6256 66.3091   5
  -8   8  -5 5.45082 42.8272   1
  -8   8  -5 25.3430 27.1241   4
  -8   8  -6 80.8961 50.9825   1
   8  -8   6 150.688 95.4991   5
  -8   8  -6 114.904 41.3663   4
   8  -8   7 187.398 95.3264   5
  -8   8  -7 237.573 67.0426   4
   8  -8   8-33.1316 57.4520   5
  -8   8  -8 53.6183 41.9395   4
   8  -8   9 470.319 130.345   5
  -8   8  -9 367.909 84.3457   4
   8  -8  10-136.949 72.1511   5
  -8   8 -10 43.9129 33.2486   4
   8  -8  11-74.8687 66.0261   5
  -8   8 -11 91.2177 50.7430   4
   8  -7 -14 42.8018 42.7280   3
   8  -7 -13 60.9845 53.1598   3
   8  -7 -12 47.7497 51.6676   3
   8  -7 -11 334.684 98.4899   5
   8  -7 -11 397.787 95.3221   3
   8  -7 -10 8.10312 45.9570   5
   8  -7 -10 30.2153 46.9539   3
   8  -7  -9-44.9421 70.3431   5
   8  -7  -9 81.3143 51.3119   3
   8  -7  -8-21.0479 69.5317   5
   8  -7  -8-13.9008 53.2154   3
   8  -7  -7 46.9400 54.9856   3
  -8   7   7 157.737 62.7336   1
   8  -7  -6 282.450 112.211   5
  -8   7   6 360.035 84.1272   2
  -8   7   6 401.898 89.6662   1
   8  -7  -5 215.628 104.224   5
  -8   7   5 278.804 81.3865   2
  -8   7   5 130.253 58.7822   1
  -8   7   4 1696.93 189.005   2
  -8   7   4 1789.72 174.434   1
  -8   7   3 342.187 83.5022   1
  -8   7   2 1490.26 154.871   1
  -8   7   1 1989.43 177.929   1
  -8   7   0 428.950 88.1171   1
  -8   7  -1 1229.65 144.443   1
  -8   7  -2 5083.34 294.854   1
  -8   7  -3 659.320 115.454   1
  -8   7  -3 619.534 64.4792   4
  -8   7  -4 8125.74 393.075   1
  -8   7  -4 7654.54 252.374   4
  -8   7  -5 4522.18 301.174   1
   8  -7   5 4354.57 399.231   5
   8  -7   6-61.6956 86.2764   5
   8  -7   7 2428.94 276.609   2
   8  -7   7 2163.20 277.566   5
   8  -7   8 1935.49 248.147   2
   8  -7   8 1900.01 260.508   5
   8  -7   9 1.94670 35.7095   5
   8  -7   9 167.517 93.9343   2
   8  -7  10 1261.14 206.074   5
   8  -7  10 1248.36 208.070   2
   8  -7  11 313.924 97.8795   5
   8  -6 -14 106.392 77.0975   3
   8  -6 -13 207.369 93.0981   3
   8  -6 -12 694.718 137.546   3
   8  -6 -11 18.1924 71.3868   5
   8  -6 -11 23.8691 47.9470   3
   8  -6 -10-3.00583 52.7716   5
   8  -6 -10-35.8553 50.8629   3
   8  -6  -9 555.837 117.088   3
  -8   6   8 436.653 98.6957   1
  -8   6   7 113.691 46.4598   2
  -8   6   7 120.417 55.9944   1
  -8   6   6 152.132 63.2442   1
  -8   6   6 130.683 52.1083   2
  -8   6   5 295.280 79.5840   1
  -8   6   5 209.306 72.0903   2
  -8   6   4 1896.22 192.203   2
  -8   6   4 2018.57 189.179   1
  -8   6   3 1090.89 138.860   1
  -8   6   3 1076.41 151.246   2
  -8   6   2 615.499 107.841   1
  -8   6   2 608.157 117.727   2
  -8   6   1 97.8869 52.2424   1
  -8   6   1 32.3657 39.5369   2
  -8   6   0 282.565 83.0820   1
  -8   6  -1 731.466 121.917   1
  -8   6  -2 5759.15 334.225   1
  -8   6  -2 5290.26 145.068   4
  -8   6  -3 2627.31 232.895   1
   8  -6   4 111.604 80.5029   2
  -8   6  -4 92.2996 60.9839   1
   8  -6   5 3549.12 302.954   2
   8  -6   6 2258.56 251.884   2
   8  -6   7 48.6442 59.7249   2
   8  -6   8 244.900 100.849   2
   8  -6   9 292.567 113.836   5
   8  -6   9 409.787 121.534   2
   8  -6  10 355.971 117.831   5
   8  -6  10 649.516 160.766   2
   8  -6  11 270.956 105.614   5
   8  -6  11 119.865 81.0809   2
   8  -5 -14 15.9768 51.1822   3
   8  -5 -13 492.616 127.379   3
   8  -5 -12 167.076 79.6927   5
   8  -5 -12 117.017 76.6365   3
   8  -5 -11 1525.55 208.067   3
   8  -5 -10 277.295 99.9511   3
  -8   5   9 128.572 63.1501   1
  -8   5   8 908.008 140.852   1
  -8   5   7 92.0787 59.1182   1
  -8   5   7 27.5093 27.3565   2
  -8   5   6 1297.88 137.474   2
  -8   5   6 1309.26 160.661   1
  -8   5   5 111.131 53.5387   1
  -8   5   5 60.5063 40.5512   2
  -8   5   4 613.613 109.536   1
  -8   5   4 495.081 94.4118   2
  -8   5   3 1375.32 158.242   2
  -8   5   3 1127.94 147.217   1
  -8   5   2 106.345 50.4405   2
  -8   5   2-27.2307 49.0622   1
  -8   5   1 855.933 131.990   1
  -8   5   1 871.804 135.284   2
  -8   5   0 10757.6 488.366   2
  -8   5   0 11758.2 476.530   1
  -8   5  -1 461.322 109.984   1
  -8   5  -1 428.168 102.573   2
   8  -5   2 5393.83 330.519   2
  -8   5  -2 6032.96 357.513   1
   8  -5   3 175.534 82.0880   2
   8  -5   4 1237.71 174.244   2
   8  -5   5-45.4604 52.0582   2
   8  -5   6 1472.29 205.007   2
   8  -5   7 1546.59 219.871   2
   8  -5   8 65.1969 80.3940   2
   8  -5   9 1228.51 208.074   2
   8  -5  10-35.3444 66.1971   2
   8  -5  11 563.146 145.902   5
   8  -5  11 817.311 189.434   2
   8  -4 -13-41.9024 68.9282   3
   8  -4 -12 91.9653 74.2754   3
   8  -4 -11 14.0906 67.1079   3
  -8   4  10 759.139 137.528   1
  -8   4   9 3815.45 286.829   1
  -8   4   8 1109.74 157.051   1
  -8   4   8 944.628 66.0148   2
  -8   4   7 631.914 117.731   1
  -8   4   7 606.666 71.6948   2
  -8   4   6 279.275 77.8162   1
  -8   4   6 237.718 53.7168   2
  -8   4   5 1005.83 110.473   2
  -8   4   5 921.280 136.164   1
  -8   4   4 2.51764 35.0584   1
  -8   4   4 71.7607 42.6006   2
  -8   4   3 1566.80 153.484   2
  -8   4   3 1497.65 174.455   1
  -8   4   2 1329.59 150.416   2
  -8   4   2 1470.94 176.699   1
  -8   4   1 4724.88 289.312   2
  -8   4   1 5600.88 338.679   1
  -8   4   0 6976.21 368.884   2
   8  -4   0 7373.83 347.066   2
  -8   4   0 7204.66 394.051   1
  -8   4  -1 155.506 78.9149   1
   8  -4   1 180.697 64.3446   2
  -8   4  -1 309.164 86.2209   2
   8  -4   2 2055.68 205.702   2
  -8   4  -2 2326.54 234.450   1
  -8   4  -2 2155.64 221.093   2
   8  -4   3 358.189 98.7797   2
   8  -4   4 637.532 138.982   2
   8  -4   5 49.0345 52.8664   2
   8  -4   6 695.727 144.645   2
   8  -4   7 519.178 138.701   2
   8  -4   8 166.516 99.6179   2
   8  -4   9-8.46698 74.6485   2
   8  -4  10 115.841 85.9827   2
   8  -4  11 87.8220 94.3020   2
   8  -3 -13 24.4904 67.0453   3
   8  -3 -12 112.395 84.3603   3
  -8   3  11 107.138 77.7667   1
   8  -3 -11 93.6625 83.8292   3
  -8   3  10 44.9858 48.9019   1
  -8   3   9-3.52036 45.9680   1
  -8   3   8 53.8452 47.2834   1
  -8   3   7 389.891 96.4002   1
  -8   3   6 3383.80 265.327   1
  -8   3   5 2504.76 228.339   1
  -8   3   5 2710.45 134.242   2
  -8   3   4 7644.81 398.169   1
  -8   3   4 8120.13 273.645   2
  -8   3   3 2766.82 244.069   1
  -8   3   3 2677.59 179.938   2
  -8   3   2 12356.7 518.658   1
  -8   3   2 11763.9 235.528   4
  -8   3   2 11688.5 395.644   2
   8  -3  -1 73.9178 47.0627   2
  -8   3   1 29.8104 46.5145   1
  -8   3   1 172.215 57.9133   2
  -8   3   1 58.0698 20.0772   4
   8  -3   0 1857.01 174.091   2
  -8   3   0 1713.66 200.474   1
  -8   3   0 1968.67 185.653   2
  -8   3  -1 328.558 101.342   1
  -8   3  -1 246.050 69.7549   2
   8  -3   1 301.885 88.1648   2
   8  -3   2 4313.53 297.205   2
  -8   3  -2 4427.76 304.184   2
   8  -3   3 1072.27 161.523   2
   8  -3   4 9029.65 468.868   2
   8  -3   5 58.9071 50.9406   2
   8  -3   6 600.102 142.759   2
   8  -3   7 1031.01 184.981   2
   8  -3   8 548.586 146.084   2
   8  -3   9 375.018 128.191   2
   8  -3  10 143.506 91.7997   2
   8  -3  11 64.3542 59.9518   2
   8  -2 -13 1488.84 247.106   3
  -8   2  12 469.250 109.322   1
   8  -2 -12 389.968 112.434   3
  -8   2  11 1320.34 183.621   1
  -8   2  10 9.87441 50.3522   1
  -8   2   9 1217.80 172.673   1
  -8   2   8 601.366 119.618   1
  -8   2   7-38.0290 58.6607   1
  -8   2   6 47.7600 51.5331   1
  -8   2   5 7598.83 405.660   1
  -8   2   4 2044.05 214.993   1
  -8   2   3 24162.9 739.289   1
  -8   2   3 24600.9 465.826   2
   8  -2  -2 7056.30 279.000   2
  -8   2   2 7436.44 415.479   1
  -8   2   2 6819.08 239.520   4
  -8   2   2 7182.15 287.651   2
   8  -2  -1 6781.70 306.677   2
  -8   2   1 6167.61 294.121   2
   8  -2   0 9240.32 390.219   2
  -8   2   0 9747.58 490.478   1
  -8   2   0 8693.20 370.500   2
  -8   2  -1-71.1749 39.9652   2
   8  -2   1-9.80592 55.9206   2
  -8   2  -1-104.476 100.940   1
  -8   2  -2 148.610 60.7202   2
   8  -2   2 28.9169 46.5323   2
   8  -2   3 3753.77 295.798   2
   8  -2   4 4016.94 318.829   2
   8  -2   5 3050.99 289.760   2
   8  -2   6 3838.10 341.354   2
   8  -2   7 37.9322 69.0157   2
   8  -2   8 1569.29 236.817   2
   8  -2   9 178.958 109.560   2
   8  -2  10 21.0356 66.4621   2
   8  -2  11 352.593 128.790   2
  -8   1  12 222.792 86.0093   1
   8  -1 -12 70.6048 98.2195   3
  -8   1  11 138.074 75.8299   1
  -8   1  10 274.085 93.4549   1
  -8   1   9 237.166 85.9867   1
  -8   1   8 1225.51 171.563   1
  -8   1   7 556.505 114.751   1
  -8   1   6 6828.25 395.343   1
  -8   1   5 8651.39 446.475   1
  -8   1   4 30.1091 25.9728   4
  -8   1   4 52.6282 60.8757   1
   8  -1  -3 4002.05 180.240   2
  -8   1   3 3380.53 287.669   1
  -8   1   3 3446.77 191.548   4
  -8   1   2 291.869 101.948   1
  -8   1   2 309.233 63.3363   4
   8  -1  -2 356.889 68.6709   2
  -8   1   1 36.9276 55.4175   1
   8  -1  -1 110.214 55.7427   2
   8  -1   0 5122.64 297.644   2
  -8   1   0 5342.46 377.084   1
  -8   1   0 5092.76 280.244   2
   8  -1   1 2115.01 205.973   2
  -8   1  -1 2295.16 200.626   2
  -8   1  -2 473.747 98.6584   2
   8  -1   2 437.420 108.090   2
   8  -1   3 2074.34 226.015   2
   8  -1   4 1370.79 193.068   2
   8  -1   5 866.493 164.910   2
   8  -1   6 732.553 162.223   2
   8  -1   7 213.004 96.3045   2
   8  -1   8 298.162 121.354   2
   8  -1   9 1436.23 240.762   2
   8  -1  10 1381.45 240.415   2
   8  -1  11 396.836 134.643   2
  -8   0  12-6.67148 38.0410   1
  -8   0  11-42.2733 51.8956   1
  -8   0  10 543.968 120.847   1
  -8   0   9 1135.39 169.649   1
  -8   0   8 105.762 60.6871   1
  -8   0   7 2524.49 250.189   1
  -8   0   6 3595.27 295.226   1
  -8   0   5 2809.53 190.180   4
  -8   0   5 2960.15 273.020   1
   8   0  -4 13293.0 250.597   2
  -8   0   4 12670.2 404.458   4
   8   0  -3 8626.99 288.092   2
  -8   0   3 8047.77 451.859   1
  -8   0   3 7588.22 321.967   4
   8   0  -2 8816.00 337.752   2
  -8   0   2 8613.37 474.340   1
  -8   0   2 7930.25 339.345   4
   8   0  -1 2391.86 196.507   2
  -8   0   1 2356.88 255.903   1
  -8   0   0 1218.70 194.779   1
   8   0   0 1014.29 139.222   2
   8   0   1 885.739 141.775   2
   8   0   2 4417.20 321.423   2
   8   0   3 1782.31 214.237   2
   8   0   4 1123.24 180.687   2
   8   0   5 1503.12 217.829   2
   8   0   6 1112.27 196.760   2
   8   0   7 69.7096 71.7057   2
   8   0   8 15.4407 56.0545   2
   8   0   9-28.4509 63.8566   2
   8   0  10 112.317 85.6372   2
  -8  -1  12 219.608 88.8349   1
  -8  -1  11 233.823 90.1214   1
  -8  -1  10 1190.66 179.900   1
  -8  -1   9 603.428 128.291   1
  -8  -1   8 268.472 92.5636   1
  -8  -1   7 1551.65 200.058   1
  -8  -1   6 459.882 113.125   1
  -8  -1   5 3145.67 281.914   1
  -8  -1   4-7.61184 45.3434   1
   8   1  -4 118.041 34.2791   2
  -8  -1   3-5.02455 58.3004   1
   8   1  -3-48.2389 34.8454   2
  -8  -1   2 61.6654 69.0773   1
   8   1  -2 33.9732 40.6116   2
  -8  -1   1 789.485 152.544   1
   8   1  -1 793.237 121.406   2
   8   1   0 3500.70 264.255   2
  -8  -1   0 4134.50 345.337   1
   8   1   1 1193.31 165.813   2
   8   1   2 437.425 110.589   2
   8   1   3 110.170 78.5339   2
   8   1   4 451.909 124.915   2
   8   1   5 1966.94 251.800   2
   8   1   6 111.787 73.7846   2
   8   1   7 756.439 172.714   2
   8   1   8 3508.98 375.949   2
   8   1   9 513.036 163.612   2
  -8  -2  12-63.9298 59.8056   1
  -8  -2  11 510.608 124.431   1
  -8  -2  10 95.2888 64.0430   1
  -8  -2   9 2222.26 241.304   1
  -8  -2   8 737.717 147.361   1
  -8  -2   7 2133.65 237.068   1
  -8  -2   6 1692.22 211.761   1
  -8  -2   5 302.515 102.478   1
  -8  -2   4 86.4962 59.3117   1
   8   2  -3 1550.80 142.986   2
  -8  -2   3 1461.46 203.037   1
  -8  -2   2 849.442 162.924   1
   8   2  -2 879.485 121.110   2
   8   2  -1 3028.44 238.557   2
  -8  -2   1 2711.63 281.190   1
  -8  -2   0 2247.00 264.637   1
   8   2   0 2212.07 220.163   2
   8   2   1 46.2328 49.8822   2
   8   2   2 498.155 122.878   2
   8   2   3 106.522 69.8088   2
   8   2   4 35.5000 58.7146   2
   8   2   5-7.04446 52.1239   2
   8   2   6 51.6282 68.8391   2
   8   2   7 517.626 154.275   2
   8   2   8 101.922 98.6663   2
  -8  -3  11-53.2740 59.6105   1
  -8  -3  10 196.551 89.1137   1
  -8  -3   9 431.905 118.415   1
  -8  -3   8 568.045 130.185   1
  -8  -3   7 635.640 131.635   1
  -8  -3   6-41.9848 56.6932   1
  -8  -3   5 1564.09 208.396   1
  -8  -3   4 122.557 71.0118   1
  -8  -3   3 139.820 62.8348   1
  -8  -3   2 495.553 128.410   1
  -8  -3   1 801.400 167.674   1
   8   3  -1 767.381 126.406   2
  -8  -3   0 556.886 141.521   1
   8   3   0 443.503 113.956   2
   8   3   1 426.736 110.635   2
  -8  -3  -1 672.753 152.132   1
   8   3   2 246.062 96.8155   2
   8   3   3 2178.35 263.613   2
   8   3   4 67.0428 66.4937   2
   8   3   5 14.7192 64.0284   2
   8   3   6 549.794 161.133   2
   8   3   7-71.9335 84.8873   2
  -8  -4  10 177.893 79.0904   1
  -8  -4   9-86.1473 67.5370   1
  -8  -4   8-48.8028 45.4095   1
  -8  -4   7 968.411 164.971   1
  -8  -4   6 302.912 98.5226   1
  -8  -4   5 695.869 147.563   1
  -8  -4   4 259.055 95.0606   1
  -8  -4   3 77.0330 56.2837   1
  -8  -4   2 282.707 102.717   1
  -8  -4   1 766.253 158.155   1
  -8  -4   0 53.2409 57.4970   1
   8   4   0 29.9345 41.7222   2
  -8  -4  -1 1372.92 218.009   1
   8   4   1 1237.92 193.124   2
   8   4   2-34.0562 62.6282   2
   8   4   3 200.899 99.9350   2
   8   4   4 89.6027 79.2768   2
   8   4   5 504.493 149.127   2
   8   4   6 79.6613 73.0166   2
  -8  -5   8 58.0644 41.7758   1
  -8  -5   7 63.6088 56.5943   1
  -8  -5   6 65.9554 70.6443   1
  -8  -5   5 697.676 144.465   1
  -8  -5   4 326.036 108.024   1
  -8  -5   3 345.111 109.339   1
  -8  -5   2 68.3707 62.8413   1
  -8  -5   1 125.253 71.7711   1
  -8  -5   0 86.5108 85.7938   1
  -8  -5  -1 101.081 78.2125   1
   8   5   2 1000.55 189.041   2
  -8  -5  -2 1158.13 207.218   1
   8   5   3 40.3979 62.6889   2
   8   5   4 359.483 145.257   2
  -8  -6   2 235.110 95.7360   1
  -8  -6   1 327.793 113.837   1
   9 -10  -9 353.773 119.198   5
   9 -10  -8 76.2117 73.9298   5
   9 -10  -7 437.682 131.510   5
   9 -10  -6-67.8627 67.9271   5
   9 -10  -5 475.866 116.499   5
   9 -10  -4 293.997 111.202   5
   9 -10  -3-374.566 129.330   5
   9 -10  -2 221.555 91.2179   5
   9 -10  -1 413.061 130.688   5
   9 -10   0 1220.58 222.740   5
   9 -10   1 121.819 78.7058   5
   9 -10   2 276.032 108.846   5
   9 -10   3 326.739 129.099   5
   9 -10   4 177.206 80.6272   5
   9 -10   5-84.1671 70.4536   5
   9 -10   6 314.176 124.125   5
   9 -10   7 50.6594 74.2546   5
   9  -9 -10-0.90556 44.8808   5
   9  -9  -9 104.232 74.5417   5
   9  -9  -8 201.675 99.2060   5
   9  -9  -7 1347.27 216.963   5
   9  -9  -6 482.584 137.522   5
   9  -9  -5 83.9097 82.2188   5
   9  -9  -4 42.7348 83.2157   5
  -9   9   4 214.481 69.3894   1
   9  -9  -3 308.593 120.635   5
  -9   9   3 326.217 79.8791   1
   9  -9  -2-7.58517 66.4385   5
  -9   9   2 50.3592 36.4502   1
   9  -9  -1 246.790 118.508   5
  -9   9   1 280.277 73.4124   1
   9  -9   0 237.105 116.550   5
  -9   9   0 190.641 61.0453   1
   9  -9   1 234.958 124.605   5
  -9   9  -1 18.5495 33.8143   1
   9  -9   2 1310.08 240.632   5
  -9   9  -2 1282.66 145.933   1
   9  -9   3 308.219 132.253   5
  -9   9  -3 641.490 109.802   1
   9  -9   4 418.810 139.592   5
   9  -9   5 289.627 104.807   5
   9  -9   6 333.868 118.685   5
   9  -9   7 175.294 84.8883   5
   9  -9   8-68.0990 79.4742   5
   9  -9   9-257.570 104.442   5
   9  -9  10 139.212 77.7727   5
   9  -8 -12-43.2147 51.4117   3
   9  -8 -11 144.911 71.2112   5
   9  -8 -11 107.227 55.9014   3
   9  -8 -10 118.182 85.0605   5
   9  -8 -10 39.2363 42.8299   3
   9  -8  -9 50.2524 56.8184   5
   9  -8  -9-100.151 56.3759   3
   9  -8  -8 3.48493 70.6533   5
   9  -8  -8 100.034 61.5576   3
   9  -8  -7 183.811 98.6511   5
   9  -8  -7 172.256 73.0693   3
   9  -8  -6 389.082 134.261   5
  -9   8   6 285.110 84.8151   1
   9  -8  -5 742.493 186.313   5
  -9   8   5 858.880 130.229   1
   9  -8  -4 519.186 158.287   5
  -9   8   4 749.679 120.718   1
   9  -8  -3 1257.98 237.690   5
  -9   8   3 1430.11 163.379   1
   9  -8  -2 108.887 104.756   5
  -9   8   2 67.7593 47.4858   1
   9  -8  -1 24.8814 68.2277   5
  -9   8   1 86.5753 53.1570   1
   9  -8   0 112.911 74.3038   5
  -9   8   0 244.014 75.0689   1
   9  -8   1-42.5953 57.1740   5
  -9   8  -1 29.7792 45.5327   1
   9  -8   2 137.817 102.340   5
  -9   8  -2 162.658 69.1145   1
  -9   8  -3 3564.34 266.339   1
   9  -8   3 3134.22 360.490   5
   9  -8   4 159.203 118.821   5
  -9   8  -4 240.958 81.3710   1
   9  -8   5 807.457 193.190   5
  -9   8  -5 1082.81 159.404   1
   9  -8   6 75.1983 61.0744   5
  -9   8  -6 160.822 63.6083   1
   9  -8   7 143.988 82.0846   5
  -9   8  -7 283.729 93.0673   1
   9  -8   8 158.411 103.410   5
   9  -8   9-17.4768 75.5497   5
   9  -8  10 138.425 74.6593   5
   9  -8  11-65.6608 60.5940   5
   9  -7 -13 123.934 68.2120   3
   9  -7 -12 81.8206 67.1110   3
   9  -7 -11-330.838 109.058   5
   9  -7 -11 190.355 76.0760   3
   9  -7 -10 378.011 123.491   5
   9  -7 -10 175.203 76.4384   3
   9  -7  -9 116.806 83.5662   5
   9  -7  -9-244.963 86.8765   3
   9  -7  -8 8.87066 69.7227   5
   9  -7  -8-23.7428 46.4956   3
  -9   7   8 102.495 57.2699   1
  -9   7   7 10.2484 34.2666   1
  -9   7   6 51.4118 45.7671   1
  -9   7   5-10.7270 41.5305   1
  -9   7   4 186.618 67.4476   1
  -9   7   3 1416.37 167.768   1
  -9   7   2 1977.73 195.547   1
  -9   7   1 4.50269 40.8042   1
  -9   7   0 320.528 90.2609   1
  -9   7  -1 1458.76 175.518   1
  -9   7  -2 1715.65 193.719   1
  -9   7  -3 208.268 78.1784   1
  -9   7  -4 400.938 101.348   1
  -9   7  -4 558.600 67.7981   4
  -9   7  -5 261.275 93.8598   1
   9  -7   7 60.7370 80.1437   5
   9  -7   7 115.257 73.8272   2
   9  -7   8 515.140 148.630   5
   9  -7   8 247.963 105.236   2
   9  -7   9-33.2184 65.5829   5
   9  -7   9 92.4664 76.5937   2
   9  -7  10 255.258 99.0352   5
   9  -7  11 629.377 162.176   5
   9  -6 -13 205.365 87.5527   3
   9  -6 -12-13.7827 56.1243   3
   9  -6 -11 486.289 138.681   5
   9  -6 -11 472.447 132.285   3
   9  -6 -10 108.310 78.2998   3
  -9   6   9 97.6358 60.5133   1
  -9   6   8 368.935 94.2674   1
  -9   6   7 169.811 74.7978   1
  -9   6   6 108.539 56.0216   1
  -9   6   5 1181.12 158.026   1
  -9   6   4 229.865 72.8897   1
  -9   6   4 343.846 87.0828   2
  -9   6   3-50.2748 61.6622   1
  -9   6   3 92.8277 58.7421   2
  -9   6   2 169.782 65.9647   2
  -9   6   2 215.010 71.6650   1
  -9   6   1 993.006 148.321   1
  -9   6   0 440.651 108.563   1
  -9   6  -1 799.026 136.538   1
  -9   6  -2 785.240 140.741   1
  -9   6  -2 792.096 53.3566   4
  -9   6  -3 508.079 117.310   1
  -9   6  -4 4587.23 343.844   1
   9  -6   4 4725.30 352.504   2
   9  -6   5 2825.38 281.986   2
   9  -6   6 1224.43 198.087   2
   9  -6   7 806.377 167.755   2
   9  -6   8 222.376 108.333   2
   9  -6   9 183.110 89.2806   2
   9  -6  10 528.611 156.443   5
   9  -6  11 270.876 117.328   5
   9  -5 -12 162.185 85.5954   3
   9  -5 -11 117.063 86.4835   3
  -9   5  10 1042.11 165.353   1
  -9   5   9 224.785 89.4903   1
  -9   5   8 131.657 68.2932   1
  -9   5   7 101.186 69.0571   1
  -9   5   6 76.6389 60.8218   1
  -9   5   5-78.9924 66.8081   1
  -9   5   5 65.6009 38.0830   2
  -9   5   4 362.769 93.1587   1
  -9   5   4 242.853 69.4144   2
  -9   5   3 51.5350 35.7853   2
  -9   5   3-35.6984 51.0370   1
  -9   5   2 2309.05 217.334   2
  -9   5   2 2098.39 218.336   1
  -9   5   1 609.455 120.353   1
  -9   5   1 807.944 136.794   2
  -9   5   0 464.701 114.783   1
  -9   5   0 347.677 95.7485   2
  -9   5  -1 706.435 142.711   1
  -9   5  -2 655.478 140.721   1
   9  -5   2 582.347 120.416   2
  -9   5  -3 381.266 113.817   1
   9  -5   3 417.694 111.122   2
   9  -5   4 494.984 123.608   2
   9  -5   5 23.7177 72.3479   2
   9  -5   6 878.405 173.757   2
   9  -5   7 882.898 175.263   2
   9  -5   8 490.273 132.935   2
   9  -5   9 136.491 95.1178   2
   9  -5  10-16.9630 65.1575   2
   9  -4 -12-112.495 77.1629   3
  -9   4  11 260.160 90.7489   1
   9  -4 -11 133.660 91.8483   3
  -9   4  10 239.699 82.3316   1
  -9   4   9 331.002 99.8014   1
  -9   4   8 1256.30 174.750   1
  -9   4   7 965.417 153.933   1
  -9   4   6 1913.21 211.140   1
  -9   4   5 83.4874 54.3852   1
  -9   4   4 657.063 94.6746   2
  -9   4   4 841.462 144.998   1
  -9   4   3 96.2327 45.4204   2
  -9   4   3 239.064 81.6451   1
  -9   4   2 114.943 49.3403   2
  -9   4   2 45.5470 38.3067   1
  -9   4   1 3137.04 278.480   1
  -9   4   1 2963.28 99.3220   4
  -9   4   1 2775.72 230.276   2
   9  -4   0 2482.01 214.036   2
  -9   4   0 2487.34 253.192   1
  -9   4   0 2304.08 218.148   2
   9  -4   1 591.386 114.727   2
  -9   4  -1 650.621 133.162   1
  -9   4  -1 530.814 112.603   2
   9  -4   2 5035.57 332.531   2
  -9   4  -2 5572.08 393.758   1
   9  -4   3 81.4972 70.3499   2
   9  -4   4 124.122 75.9874   2
   9  -4   5 919.028 168.281   2
   9  -4   6 432.433 129.702   2
   9  -4   7 635.133 156.800   2
   9  -4   8 1685.66 247.556   2
   9  -4   9-161.246 93.0903   2
   9  -4  10 28.8680 56.0685   2
   9  -3 -12 255.185 122.776   3
  -9   3  11 307.580 99.7947   1
  -9   3  10-32.5582 53.9985   1
  -9   3   9 65.7346 59.3806   1
  -9   3   8-30.0306 52.4548   1
  -9   3   7 457.191 114.006   1
  -9   3   6 559.429 128.911   1
  -9   3   5 4131.10 318.224   1
  -9   3   4 37.8372 26.2364   2
  -9   3   4 114.065 65.6232   1
  -9   3   3 267.220 61.9886   2
  -9   3   3 257.914 99.4505   1
  -9   3   2-3.24176 32.6694   2
  -9   3   2-38.2944 53.1646   1
  -9   3   2 27.6329 18.7618   4
   9  -3  -1 145.089 59.5553   2
  -9   3   1 206.829 75.9220   1
  -9   3   1 110.108 48.0906   2
  -9   3   1 168.714 38.8956   4
   9  -3   0 10.6757 41.6396   2
  -9   3   0 29.0229 69.7864   1
  -9   3   0-38.5028 32.7423   2
  -9   3  -1 36.5198 58.1354   1
  -9   3  -1 54.3650 44.7524   2
   9  -3   1 1.75287 44.4851   2
   9  -3   2 167.981 73.8579   2
  -9   3  -2 259.472 103.072   1
   9  -3   3 1039.22 163.589   2
   9  -3   4 27.4717 56.7356   2
   9  -3   5 161.332 85.1677   2
   9  -3   6 3.21953 62.5829   2
   9  -3   7-18.2085 66.6091   2
   9  -3   8 89.2937 77.1794   2
   9  -3   9 113.309 79.0461   2
   9  -3  10 222.302 95.8863   2
  -9   2  11 462.642 118.278   1
  -9   2  10 286.529 91.2568   1
  -9   2   9 105.555 76.5812   1
  -9   2   8 932.163 159.720   1
  -9   2   7 1023.08 164.536   1
  -9   2   6 1209.24 179.514   1
  -9   2   5 531.367 124.233   1
  -9   2   4 15654.0 638.070   1
  -9   2   3 1294.18 109.985   4
  -9   2   3 1672.25 221.557   1
   9  -2  -2 5228.74 253.579   2
  -9   2   2 5619.65 394.067   1
  -9   2   2 4749.65 217.632   4
  -9   2   2 5293.87 262.523   2
   9  -2  -1 643.412 104.062   2
  -9   2   1 727.205 149.445   1
  -9   2   1 550.216 94.4862   2
  -9   2   1 555.677 82.1795   4
  -9   2   0 114.526 50.5786   2
   9  -2   0 60.0436 47.5640   2
   9  -2   1 1547.01 182.237   2
  -9   2  -1 1908.16 243.265   1
  -9   2  -1 1692.07 182.482   2
   9  -2   2 147.722 68.8003   2
   9  -2   3 618.159 132.637   2
   9  -2   4 648.255 141.205   2
   9  -2   5 55.9581 66.5911   2
   9  -2   6 1444.72 221.311   2
   9  -2   7 263.360 111.332   2
   9  -2   8 97.3055 83.2639   2
   9  -2   9 2391.72 305.729   2
  -9   1  11 622.595 145.574   1
  -9   1  10 869.845 159.351   1
  -9   1   9 36.9918 48.2535   1
  -9   1   8 156.518 71.2176   1
  -9   1   7 121.360 67.2294   1
  -9   1   6 436.555 118.548   1
  -9   1   5 296.362 112.485   1
  -9   1   4 85.8027 37.2585   4
  -9   1   4-18.6197 55.4267   1
   9  -1  -3 80.4547 37.9018   2
  -9   1   3 73.8485 31.7340   4
  -9   1   3 114.457 68.1474   1
   9  -1  -2 5306.09 261.619   2
  -9   1   2 5991.11 418.182   1
  -9   1   2 5365.93 267.245   4
   9  -1  -1 4464.11 268.225   2
  -9   1   1 4229.07 248.734   4
  -9   1   0 1097.13 188.542   1
   9  -1   0 1002.09 142.121   2
  -9   1  -1 24.8111 71.2976   1
   9  -1   1 84.2689 54.1808   2
   9  -1   2 0.35428 46.0641   2
   9  -1   3 154.804 75.6035   2
   9  -1   4-34.4208 58.2067   2
   9  -1   5 376.869 121.528   2
   9  -1   6-58.6725 66.6134   2
   9  -1   7-71.2740 71.2059   2
   9  -1   8-4.59200 74.4927   2
   9  -1   9-23.9670 64.9329   2
  -9   0  10 23.6296 54.5241   1
  -9   0   9 26.9702 46.9843   1
  -9   0   8 127.875 73.6693   1
  -9   0   7 1181.77 179.790   1
  -9   0   6 1205.95 186.431   1
  -9   0   5 905.532 164.255   1
  -9   0   4 2038.57 248.176   1
  -9   0   3 315.032 110.413   1
  -9   0   2 406.501 115.798   1
   9   0  -2 406.606 82.4558   2
   9   0  -1 1634.74 170.074   2
  -9   0   1 1933.04 246.877   1
  -9   0   0 1738.79 242.209   1
   9   0   0 955.810 143.927   2
   9   0   1 88.8427 55.3939   2
  -9   0  -1-1.91599 65.7575   1
   9   0   2 632.033 128.856   2
   9   0   3 572.882 134.233   2
   9   0   4 1014.77 179.634   2
   9   0   5 276.384 109.980   2
   9   0   6 50.6871 64.6527   2
   9   0   7 624.562 164.668   2
   9   0   8 200.996 106.434   2
  -9  -1  10 52.5295 60.3877   1
  -9  -1   9-114.154 74.7228   1
  -9  -1   8 168.538 85.7181   1
  -9  -1   7 280.716 108.838   1
  -9  -1   6 300.995 102.081   1
  -9  -1   5 1549.55 218.309   1
  -9  -1   4 7.50014 54.3957   1
  -9  -1   3 1956.96 245.774   1
  -9  -1   2 133.753 81.9145   1
  -9  -1   1 225.018 99.9889   1
   9   1  -1 61.9845 47.1712   2
  -9  -1   0 62.9534 74.1068   1
   9   1   0-60.4007 49.2049   2
  -9  -1  -1 693.713 155.649   1
   9   1   1 691.791 132.676   2
   9   1   2 47.9436 53.2290   2
   9   1   3 699.864 146.318   2
   9   1   4 819.284 167.600   2
   9   1   5 2.08854 49.5087   2
   9   1   6-51.4080 77.3812   2
   9   1   7 1153.00 225.463   2
   9   1   8 2194.46 322.097   2
  -9  -2   9 309.227 108.645   1
  -9  -2   8 515.155 132.005   1
  -9  -2   7 18.9252 55.0007   1
  -9  -2   6-38.8535 51.9467   1
  -9  -2   5 62.2301 59.9449   1
  -9  -2   4 342.610 115.542   1
  -9  -2   3 107.103 77.4448   1
  -9  -2   2 2874.06 307.684   1
  -9  -2   1 790.765 170.173   1
  -9  -2   0-108.848 101.187   1
   9   2   0 29.4949 47.2068   2
  -9  -2  -1 893.228 187.362   1
   9   2   1 814.323 150.241   2
   9   2   2 538.028 136.719   2
   9   2   3-41.6138 58.0596   2
   9   2   4-230.674 97.5553   2
   9   2   5 235.523 106.788   2
   9   2   6 380.438 70.9628   2
   9   2   7 435.711 151.299   2
  -9  -3   7 2916.11 296.630   1
  -9  -3   6 65.8464 58.6690   1
  -9  -3   5 119.483 71.3765   1
  -9  -3   4 77.8565 68.0422   1
  -9  -3   3 1073.58 192.088   1
  -9  -3   2 128.305 86.9658   1
  -9  -3   1 2920.27 316.649   1
  -9  -3   0 366.430 117.655   1
  -9  -3  -1 900.366 181.106   1
   9   3   2 118.284 82.2223   2
  -9  -3  -2-25.5088 50.6579   1
   9   3   3 398.250 116.921   2
   9   3   4 1378.84 243.578   2
   9   3   5 34.6568 59.0323   2
  -9  -4   5 205.417 94.9771   1
  -9  -4   4 930.317 176.375   1
  -9  -4   3 343.552 119.994   1
  -9  -4   2 72.2951 75.0392   1
  -9  -4   1 98.7545 84.8756   1
  10  -9  -9 141.846 98.3341   5
  10  -9  -8 66.3138 63.4988   5
  10  -9  -7 28.8984 63.5877   5
  10  -9  -6 584.261 163.613   5
 -10   9   6 358.243 96.7134   1
  10  -9  -5 176.965 107.385   5
 -10   9   5-42.7168 45.1997   1
  10  -9  -4 707.495 183.191   5
 -10   9   4 689.539 125.827   1
  10  -9  -3 151.196 114.590   5
 -10   9   3 94.2332 50.4733   1
 -10   9   2 39.6985 41.7760   1
  10  -9  -2-30.9245 68.2402   5
  10  -9  -1 282.970 134.819   5
 -10   9   1 278.003 79.0168   1
  10  -9   0 33.6625 74.9703   5
 -10   9   0 5.14552 42.0655   1
  10  -9   1 195.390 104.923   5
 -10   9  -1 205.285 75.5037   1
  10  -9   2 372.557 139.472   5
 -10   9  -2 945.055 146.162   1
  10  -9   3 1233.26 230.612   5
  10  -9   4-21.9084 63.2617   5
  10  -9   5 601.674 170.858   5
  10  -9   6 463.456 156.716   5
  10  -9   7-31.0579 74.5252   5
  10  -8 -10 260.349 120.466   5
  10  -8 -10 323.052 102.827   3
  10  -8  -9 180.110 105.551   5
  10  -8  -9 224.254 86.7454   3
  10  -8  -8 128.136 89.0162   5
  10  -8  -8 90.9514 62.2110   3
  10  -8  -7-79.6250 84.1478   5
 -10   8   7 117.907 66.0632   1
  10  -8  -6 130.011 102.922   5
 -10   8   6 380.347 102.782   1
  10  -8  -5 417.145 144.895   5
 -10   8   5 139.163 69.3558   1
 -10   8   4 270.367 93.6145   1
 -10   8   3 443.539 104.868   1
 -10   8   2 5.84503 48.4696   1
 -10   8   1-1.55334 49.9291   1
 -10   8   0 8.88493 39.5709   1
 -10   8  -1 346.674 98.3786   1
 -10   8  -2 1821.65 207.264   1
 -10   8  -3 1472.25 192.160   1
  10  -8   4 276.892 117.404   5
 -10   8  -4 361.783 98.5343   1
  10  -8   5 119.306 97.0714   5
 -10   8  -5 218.540 84.2881   1
  10  -8   6 114.178 95.6309   5
 -10   8  -6 230.162 93.0415   1
  10  -8   7-52.0643 66.5648   5
 -10   8  -7 56.3401 63.8250   1
  10  -8   8-155.368 103.020   5
  10  -8   9-69.5385 81.7325   5
  10  -8  10-88.4289 65.1140   5
  10  -7 -11 300.711 120.752   5
  10  -7 -11 134.047 88.2404   3
  10  -7 -10-245.267 105.662   5
  10  -7 -10 12.6232 53.4061   3
 -10   7   9-4.17728 34.6992   1
  10  -7  -9-147.104 85.0001   3
 -10   7   8 319.440 97.9495   1
 -10   7   7 157.694 67.8081   1
 -10   7   6-0.34134 39.4645   1
 -10   7   5 84.8718 54.0001   1
 -10   7   4 585.286 122.672   1
 -10   7   3 681.527 130.612   1
 -10   7   2 808.900 139.031   1
 -10   7   1-29.6806 54.3490   1
 -10   7   0 124.663 67.6765   1
 -10   7  -1-66.7028 63.0832   1
 -10   7  -2 954.190 161.780   1
 -10   7  -3 59.0123 51.1075   1
 -10   7  -4 478.464 126.059   1
 -10   7  -5 1192.91 194.280   1
 -10   7  -6 140.063 79.2481   1
  10  -7   7 648.960 155.587   2
  10  -7   9 356.365 140.681   5
  10  -7  10 724.663 180.139   5
  10  -6 -11 64.7659 71.7536   3
  10  -6 -10 225.602 106.287   3
 -10   6  10 319.770 106.598   1
 -10   6   9 58.5705 57.7162   1
 -10   6   8 66.9474 65.8778   1
 -10   6   7 506.688 115.477   1
 -10   6   6 65.7920 56.9204   1
 -10   6   5 79.0817 45.3414   1
 -10   6   4 93.8563 56.8283   1
 -10   6   3 36.8166 36.2784   1
 -10   6   2-60.7257 52.1928   1
 -10   6   1 38.3717 54.2738   1
 -10   6   0 203.572 86.2232   1
 -10   6  -1 307.811 96.4081   1
 -10   6  -2 229.782 87.9114   1
 -10   6  -3 26.0489 66.1594   1
 -10   6  -4 48.3511 60.3786   1
  10  -6   4-96.8850 68.7955   2
  10  -6   5 229.712 102.091   2
 -10   6  -5 230.276 95.5728   1
  10  -6   6-10.3702 49.5748   2
  10  -6   7-191.953 93.8880   2
  10  -6   8 146.240 81.1223   2
  10  -5 -11-59.6666 71.5734   3
 -10   5  10 148.171 83.8852   1
 -10   5   9-38.7987 52.8930   1
 -10   5   8 995.247 167.189   1
 -10   5   7 702.139 139.786   1
 -10   5   6 875.136 152.382   1
 -10   5   5-12.7268 39.3803   1
 -10   5   4 1335.34 183.772   1
 -10   5   3 795.315 152.323   1
 -10   5   2-42.6114 59.3594   1
 -10   5   1 356.741 107.301   1
 -10   5   0 4012.55 334.934   1
 -10   5  -1 2.54898 73.5619   1
  10  -5   2 3584.61 296.520   2
 -10   5  -2 4180.10 356.283   1
 -10   5  -3 45.5844 59.8566   1
  10  -5   3 116.050 71.7326   2
  10  -5   4 95.5018 71.6045   2
 -10   5  -4 92.5905 82.1635   1
  10  -5   5 472.684 128.498   2
  10  -5   6 229.058 91.9230   2
  10  -5   7 82.6553 65.3784   2
  10  -5   8 273.327 107.012   2
 -10   4  10 101.706 62.7271   1
 -10   4   9 364.572 110.923   1
 -10   4   8-37.8092 51.7464   1
 -10   4   7 807.718 152.825   1
 -10   4   6 414.787 108.248   1
 -10   4   5 2653.01 266.035   1
 -10   4   4-104.025 69.7485   1
 -10   4   3 1446.80 204.539   1
 -10   4   2 1407.31 203.523   1
 -10   4   1 160.536 89.5775   1
  10  -4   0-39.1422 42.8399   2
 -10   4   0 38.3158 76.5357   1
  10  -4   1 726.279 130.155   2
 -10   4  -1 900.038 171.371   1
  10  -4   2 157.616 75.4585   2
 -10   4  -2 249.992 107.777   1
  10  -4   3 1939.01 228.631   2
 -10   4  -3 2106.45 264.993   1
  10  -4   4 445.034 130.067   2
  10  -4   5 163.340 84.7638   2
  10  -4   6 401.586 133.324   2
  10  -4   7 572.968 156.330   2
  10  -4   8 174.378 97.8950   2
 -10   3   9 544.051 131.365   1
 -10   3   8 1995.34 236.905   1
 -10   3   7 349.670 108.316   1
 -10   3   6 370.857 111.640   1
 -10   3   5 163.461 89.1185   1
 -10   3   4 2035.73 245.123   1
 -10   3   3 273.350 102.927   1
 -10   3   2 2470.67 275.001   1
  10  -3  -1 1050.01 135.807   2
 -10   3   1 892.283 166.958   1
  10  -3   0 178.828 67.6127   2
 -10   3   0 219.685 92.7732   1
  10  -3   1 1244.70 169.304   2
 -10   3  -1 1449.00 222.137   1
 -10   3  -2 238.316 109.423   1
  10  -3   2 350.774 100.745   2
  10  -3   3 46.9919 54.6903   2
 -10   3  -3 14.3911 69.7679   1
  10  -3   4 277.156 104.015   2
  10  -3   5 63.3954 65.3972   2
  10  -3   6 73.8461 72.2193   2
  10  -3   7 1002.18 200.283   2
  10  -3   8-0.57516 42.1159   2
 -10   2   9 29.8701 58.5731   1
 -10   2   8 188.304 97.8084   1
 -10   2   7 157.546 90.2829   1
 -10   2   6 1169.50 186.635   1
 -10   2   5 1808.00 233.246   1
 -10   2   4 3198.37 313.351   1
 -10   2   3 325.272 111.975   1
 -10   2   2-28.4076 77.7909   1
  10  -2  -1 117.683 48.5277   2
 -10   2   1 254.697 105.359   1
 -10   2   0 441.826 125.271   1
  10  -2   0 429.717 94.9840   2
 -10   2  -1 2020.73 268.753   1
  10  -2   1 1339.69 175.667   2
 -10   2  -2 467.624 146.614   1
  10  -2   2 216.925 82.7757   2
  10  -2   3 207.344 77.2149   2
  10  -2   4 972.450 175.448   2
  10  -2   5 83.1187 67.9938   2
  10  -2   6-32.2769 57.3291   2
  10  -2   7 7.25692 52.5347   2
  10  -2   8 177.944 107.874   2
 -10   1   8-81.8158 87.1192   1
 -10   1   7 66.8279 72.7699   1
 -10   1   6 393.959 118.865   1
 -10   1   5 221.182 92.0616   1
 -10   1   4 133.915 79.6615   1
 -10   1   3 894.053 178.572   1
 -10   1   2 1276.14 211.248   1
 -10   1   1-11.0775 67.7954   1
 -10   1   0-121.381 87.7589   1
  10  -1   0 59.4871 42.4312   2
 -10   1  -1 65.3837 69.2396   1
  10  -1   1 4.47529 54.2758   2
  10  -1   2 407.708 111.709   2
 -10   1  -2 659.635 161.424   1
  10  -1   3 1174.37 187.513   2
  10  -1   4 28.3181 49.4009   2
  10  -1   5 854.244 178.567   2
  10  -1   6 407.679 132.178   2
  10  -1   7 205.199 99.6151   2
 -10   0   7 66.6737 57.2038   1
 -10   0   6-16.3206 43.3892   1
 -10   0   5 468.988 125.589   1
 -10   0   4 93.5221 70.3291   1
 -10   0   3 385.004 127.408   1
 -10   0   2 375.147 121.886   1
 -10   0   1 354.134 128.275   1
 -10   0   0 1194.21 212.459   1
 -10   0  -1-55.1208 72.4027   1
  10   0   1-116.157 62.8288   2
  10   0   2-14.5374 41.2073   2
 -10   0  -2 117.563 102.802   1
  10   0   3 69.6352 57.6251   2
  10   0   4 72.0057 75.8824   2
  10   0   5-111.386 68.4815   2
  10   0   6 85.4535 81.0862   2
  10   0   7 993.045 216.771   2
 -10  -1   6 9.15668 53.0500   1
 -10  -1   5 630.097 149.428   1
 -10  -1   4 548.815 154.132   1
 -10  -1   3 169.080 93.8462   1
 -10  -1   2 705.023 163.340   1
 -10  -1   1 36.1954 86.3882   1
 -10  -1   0 409.194 122.240   1
 -10  -1  -1 2759.11 330.086   1
 -10  -1  -2 74.8368 82.1963   1
  10   1   3 0.94977 41.4711   2
  10   1   4 133.042 83.7724   2
  10   1   5 93.3145 87.6684   2
  10   1   6 591.034 174.448   2
 -11   9   7 145.869 73.0348   1
 -11   9   6 90.7127 62.4622   1
 -11   9   5 260.691 80.4356   1
 -11   9   4 147.104 64.5541   1
 -11   9   3 43.6001 52.1910   1
 -11   9   2 200.002 82.5148   1
 -11   9   1 324.950 90.5300   1
 -11   9   0 57.4842 45.5340   1
 -11   9  -1 34.2969 45.2676   1
  11  -8  -9 246.052 115.155   3
 -11   8   7 74.4367 63.3024   1
 -11   8   6 55.3391 50.0642   1
 -11   8   5 56.0829 41.0674   1
 -11   8   4 521.305 121.298   1
 -11   8   3 37.3514 43.6062   1
 -11   8   2 1168.80 177.060   1
 -11   8   1 91.0907 66.6663   1
 -11   8   0-103.079 65.2842   1
 -11   8  -1-21.5018 44.0131   1
 -11   8  -2 296.523 102.898   1
 -11   8  -3 604.143 138.615   1
 -11   8  -4 1205.27 193.138   1
 -11   8  -5 171.190 86.0159   1
 -11   8  -6 282.752 104.153   1
  11  -7 -10 34.9502 66.1875   3
 -11   7   7 11.0938 58.9377   1
 -11   7   6 125.466 68.3806   1
 -11   7   5 92.2177 66.6267   1
 -11   7   4 13.7364 47.0221   1
 -11   7   3-8.81419 47.6949   1
 -11   7   2 37.9642 54.0722   1
 -11   7   1 576.609 131.943   1
 -11   7   0 52.6227 56.8749   1
 -11   7  -1 532.215 132.249   1
 -11   7  -2 1026.73 180.444   1
 -11   7  -3 312.103 106.557   1
 -11   7  -4 1192.93 201.476   1
 -11   7  -5 108.638 72.2168   1
 -11   7  -6 344.579 125.443   1
 -11   7  -7-160.534 85.6457   1
 -11   6   7 937.330 171.185   1
 -11   6   6 830.803 159.157   1
 -11   6   5 332.305 104.132   1
 -11   6   4 755.060 146.700   1
 -11   6   3 18.4508 55.6025   1
 -11   6   2 1.26123 39.4785   1
 -11   6   1-32.1918 50.1774   1
 -11   6   0 620.839 143.096   1
 -11   6  -1-39.4778 80.8590   1
 -11   6  -2 73.4020 63.9882   1
 -11   6  -3 480.085 128.965   1
 -11   6  -4-12.8606 68.0134   1
  11  -6   4 133.201 81.6130   2
 -11   6  -5 299.840 117.748   1
  11  -6   5 245.470 93.2508   2
  11  -6   6 235.312 96.8476   2
 -11   6  -6-10.3672 62.5940   1
 -11   5   7 2676.45 285.404   1
 -11   5   6 39.6799 55.7856   1
 -11   5   5 792.810 161.853   1
 -11   5   4 259.037 103.454   1
 -11   5   3 172.748 87.4741   1
 -11   5   2 309.096 120.950   1
 -11   5   1 932.728 176.722   1
 -11   5   0 43.2696 69.6713   1
 -11   5  -1 215.520 95.1263   1
  11  -5   2 659.835 134.344   2
 -11   5  -2 606.229 155.263   1
 -11   5  -3 95.8384 79.6649   1
  11  -5   3 160.946 86.8719   2
 -11   5  -4-5.46106 52.1952   1
  11  -5   4 78.6164 61.1219   2
  11  -5   5 125.046 76.7575   2
 -11   5  -5-37.1014 51.3751   1
  11  -5   6 1151.63 207.753   2
  11  -5   7 355.046 127.642   2
 -11   4   7 1313.14 203.239   1
 -11   4   6 3248.66 312.824   1
 -11   4   5 287.500 101.541   1
 -11   4   4 839.003 169.133   1
 -11   4   3 557.442 139.344   1
 -11   4   2-18.9274 62.8960   1
 -11   4   1 1483.49 224.313   1
 -11   4   0 368.336 132.828   1
  11  -4   1 1160.57 170.973   2
 -11   4  -1 1025.09 195.383   1
  11  -4   2 76.9288 54.7220   2
 -11   4  -2 78.1848 65.6196   1
  11  -4   3 20.6591 49.2674   2
 -11   4  -3 50.0820 89.9352   1
 -11   4  -4 109.709 78.4803   1
  11  -4   4-38.4877 65.3911   2
  11  -4   5 240.657 99.1084   2
  11  -4   6 247.804 107.192   2
  11  -4   7 1687.43 263.355   2
 -11   3   6 82.8893 73.8873   1
 -11   3   5 548.074 146.470   1
 -11   3   4 1179.99 205.727   1
 -11   3   3 440.482 134.721   1
 -11   3   2 68.9361 72.7786   1
 -11   3   1-28.9279 53.8672   1
 -11   3   0 205.171 115.194   1
  11  -3   1-42.4979 51.2661   2
 -11   3  -1 3.93468 66.0908   1
  11  -3   2 17.0838 48.4680   2
 -11   3  -2 46.1140 77.2025   1
 -11   3  -3-102.518 86.3709   1
  11  -3   3-31.7968 66.1091   2
  11  -3   4 1631.81 231.470   2
 -11   3  -4 2034.56 295.838   1
  11  -3   5 280.842 106.580   2
  11  -3   6 371.267 126.585   2
  11  -3   7-100.148 78.1958   2
 -11   2   5 92.7166 75.0480   1
 -11   2   4 69.0316 55.0110   1
 -11   2   3 2140.01 281.706   1
 -11   2   2 40.5874 53.4684   1
 -11   2   1 219.320 110.027   1
 -11   2   0 246.550 109.185   1
 -11   2  -1 272.501 98.9459   1
 -11   2  -2 226.624 110.810   1
  11  -2   2 126.284 85.7623   2
  11  -2   3 528.656 124.908   2
  11  -2   4 380.907 133.002   2
  11  -2   5 1907.18 258.172   2
  11  -2   6 251.643 109.163   2
 -11   1   2 102.208 67.9044   1
 -11   1   1 93.9472 78.3014   1
  11  -1   3-31.1741 70.0731   2
  11  -1   4 795.666 171.349   2
  11  -1   5 1163.79 213.164   2
  11  -1   6 263.514 112.076   2
 -12   9   4 101.166 73.5919   1
 -12   9   3 199.946 90.4502   1
 -12   9   2 128.454 67.8031   1
 -12   9   1 37.8709 53.7061   1
 -12   9   0 305.874 95.6305   1
 -12   8   4 550.252 133.772   1
 -12   8   3-9.22772 41.0208   1
 -12   8   2 620.992 138.956   1
 -12   8   1 111.965 71.8825   1
 -12   8   0 52.5628 50.9788   1
 -12   8  -1 67.6965 53.8030   1
 -12   8  -2 65.2783 61.4870   1
 -12   8  -3 75.0103 54.1983   1
 -12   8  -4 20.5384 52.9412   1
 -12   7   4 72.5206 77.0466   1
 -12   7   3 140.144 81.2181   1
 -12   7   2 1036.08 182.092   1
 -12   7   1 87.8022 69.5719   1
 -12   7   0 542.977 143.734   1
 -12   7  -1 41.7137 68.1532   1
 -12   7  -2 12.3095 56.7199   1
 -12   7  -3 171.261 104.095   1
 -12   7  -4 373.746 127.470   1
 -12   6   3 47.2063 58.7949   1
 -12   6   2-75.4128 69.9818   1
 -12   6   1 42.4394 51.5858   1
 -12   6   0-120.070 83.4800   1
 -12   6  -1 640.228 161.429   1
 -12   6  -2 431.665 137.697   1
 -12   6  -3 414.669 146.238   1
  12  -6   5 559.178 145.999   2
 -12   5   2 183.976 92.1151   1
 -12   5   1 232.773 100.712   1
 -12   5   0 397.361 124.610   1
 -12   5  -1 264.018 108.448   1
  12  -5   3 97.4964 68.7807   2
  12  -5   4-49.5899 65.3834   2
  12  -5   5 418.514 132.943   2
  12  -4   4-154.865 90.0660   2
  12  -4   5 79.4253 76.3067   2
   0   0   0    0.00    0.00   0

TITL bmk2119b_auto in P-1
REM P-1 (#2 in standard setting)
CELL 0.71073   9.329985   9.455107  13.608235  91.9148  94.1461 115.2684
ZERR    2.00   0.001044   0.001143   0.001312   0.0089   0.0085   0.0114
LATT  1
SFAC C H N O S
UNIT 44.00 24.00 4.00 4.00 2.00
SIZE 0.16 0.18 0.43
TREF
HKLF 4
END
;
_shelx_hkl_checksum   16251
