# Supplementary material
Source: MDPI journal article supplement (https://www.mdpi.com/2073-4352/12/5/663)

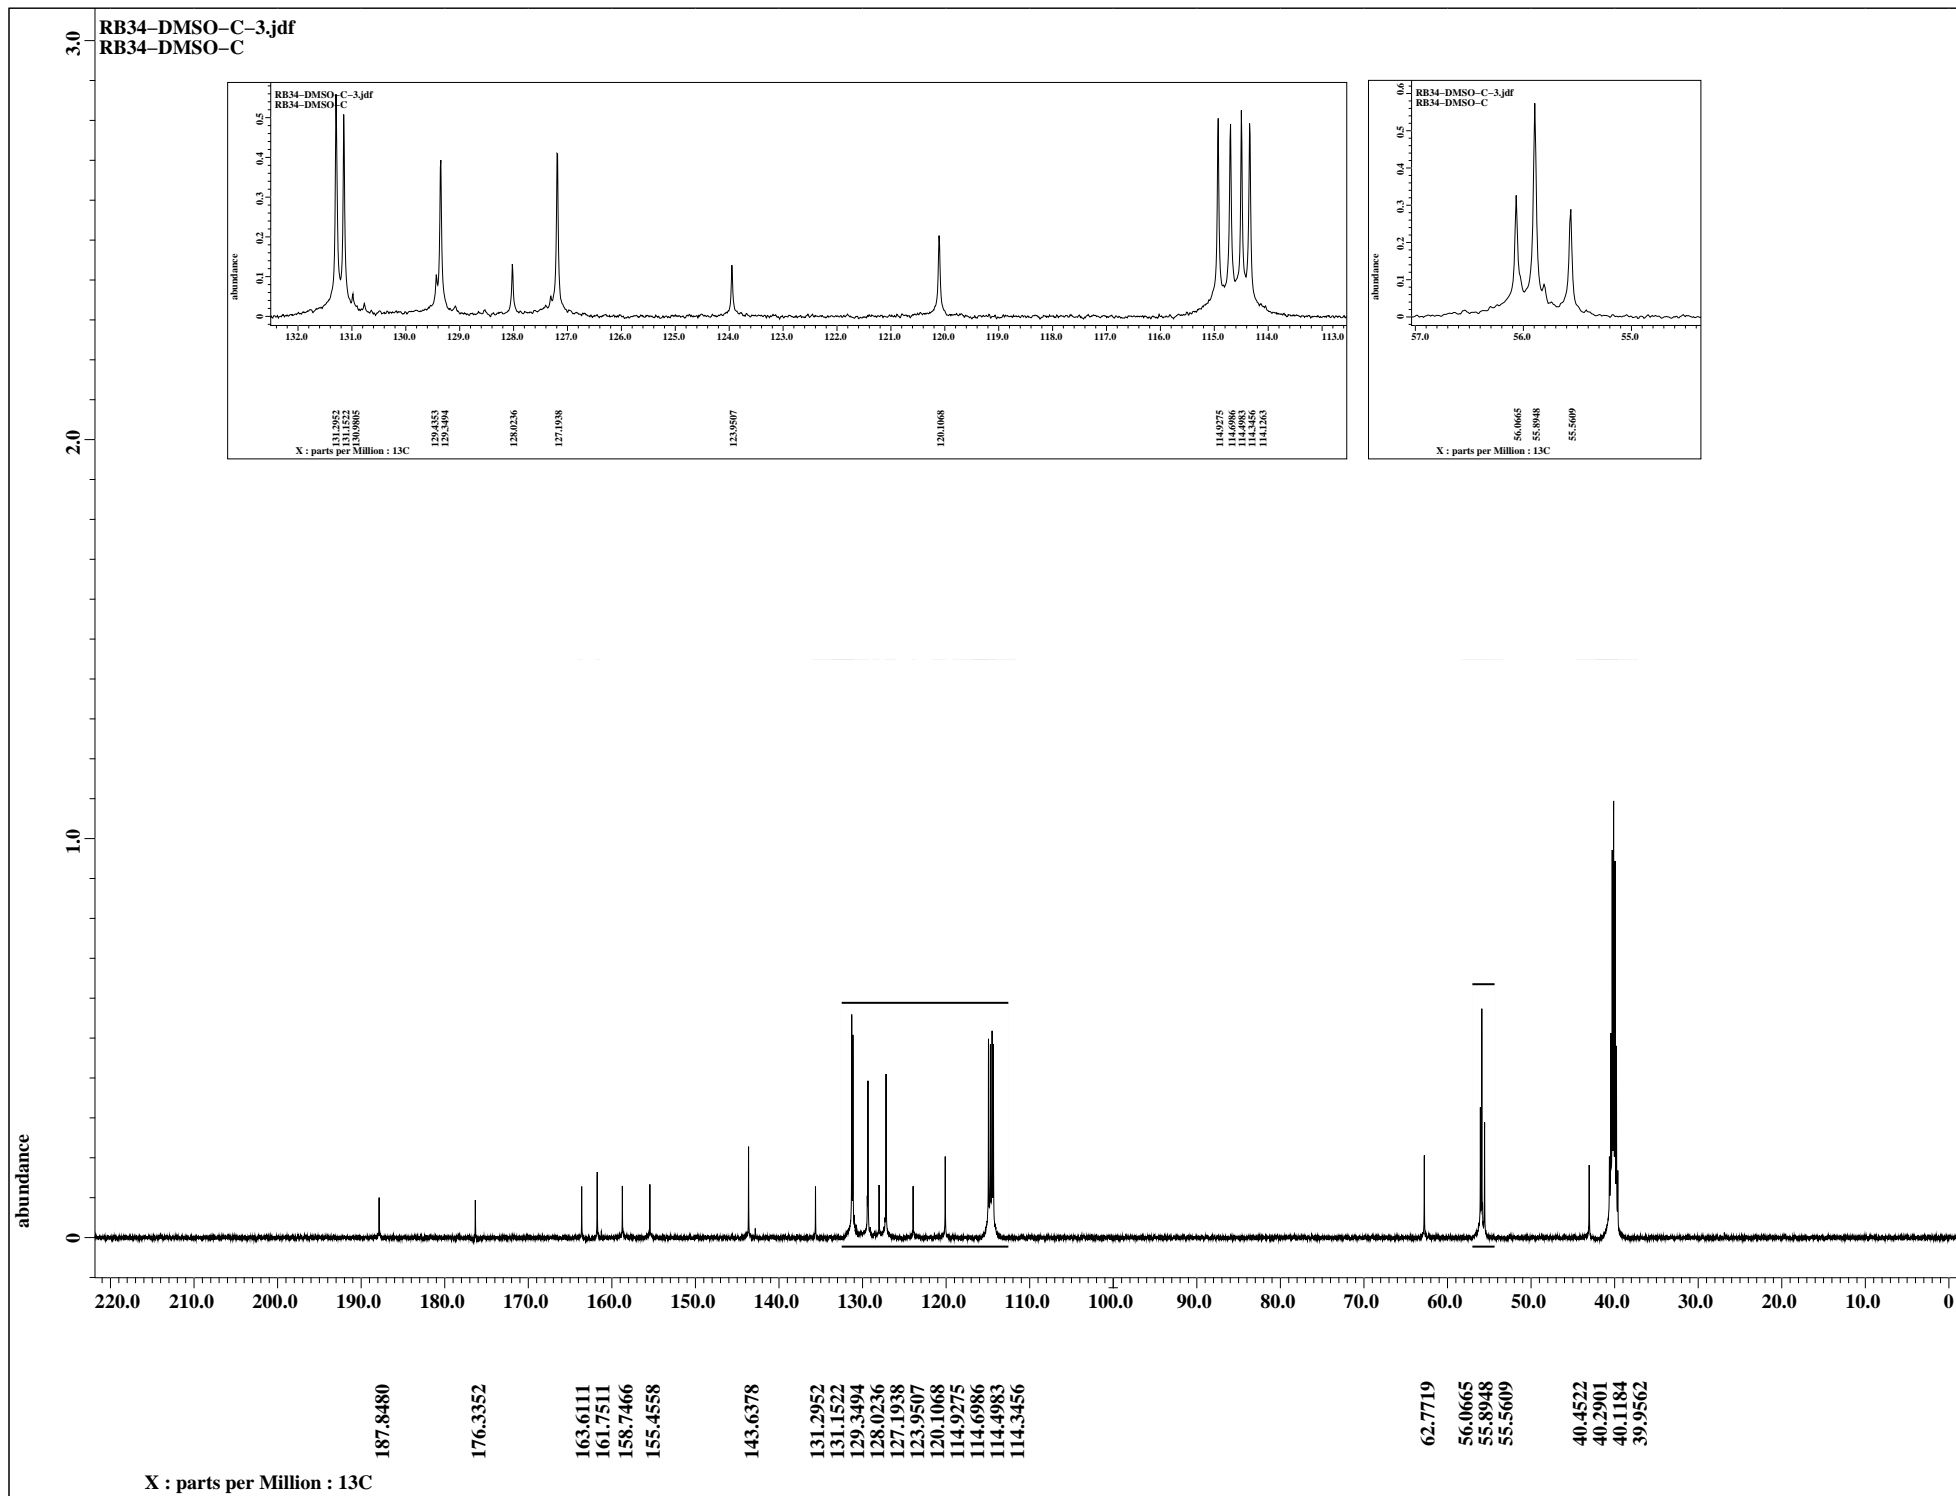

Supplement: s1 [file s1]

RB34-DMSO-D2O-H-5.jdf  
RB34-DMSO-D2O-H

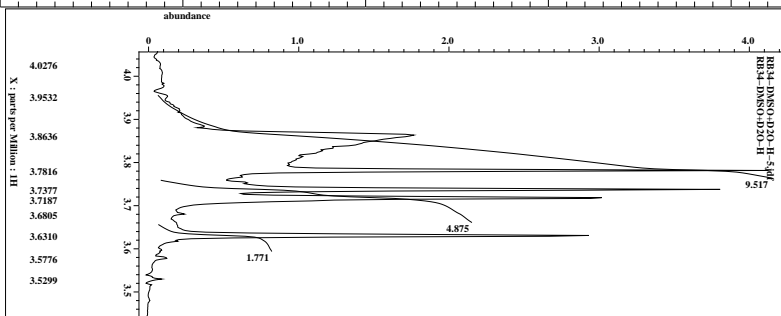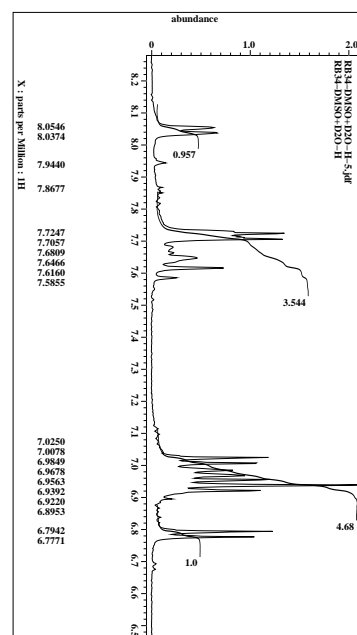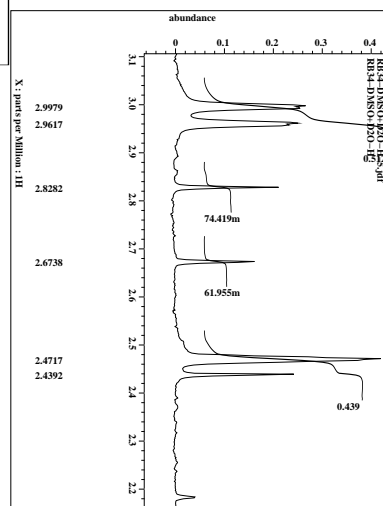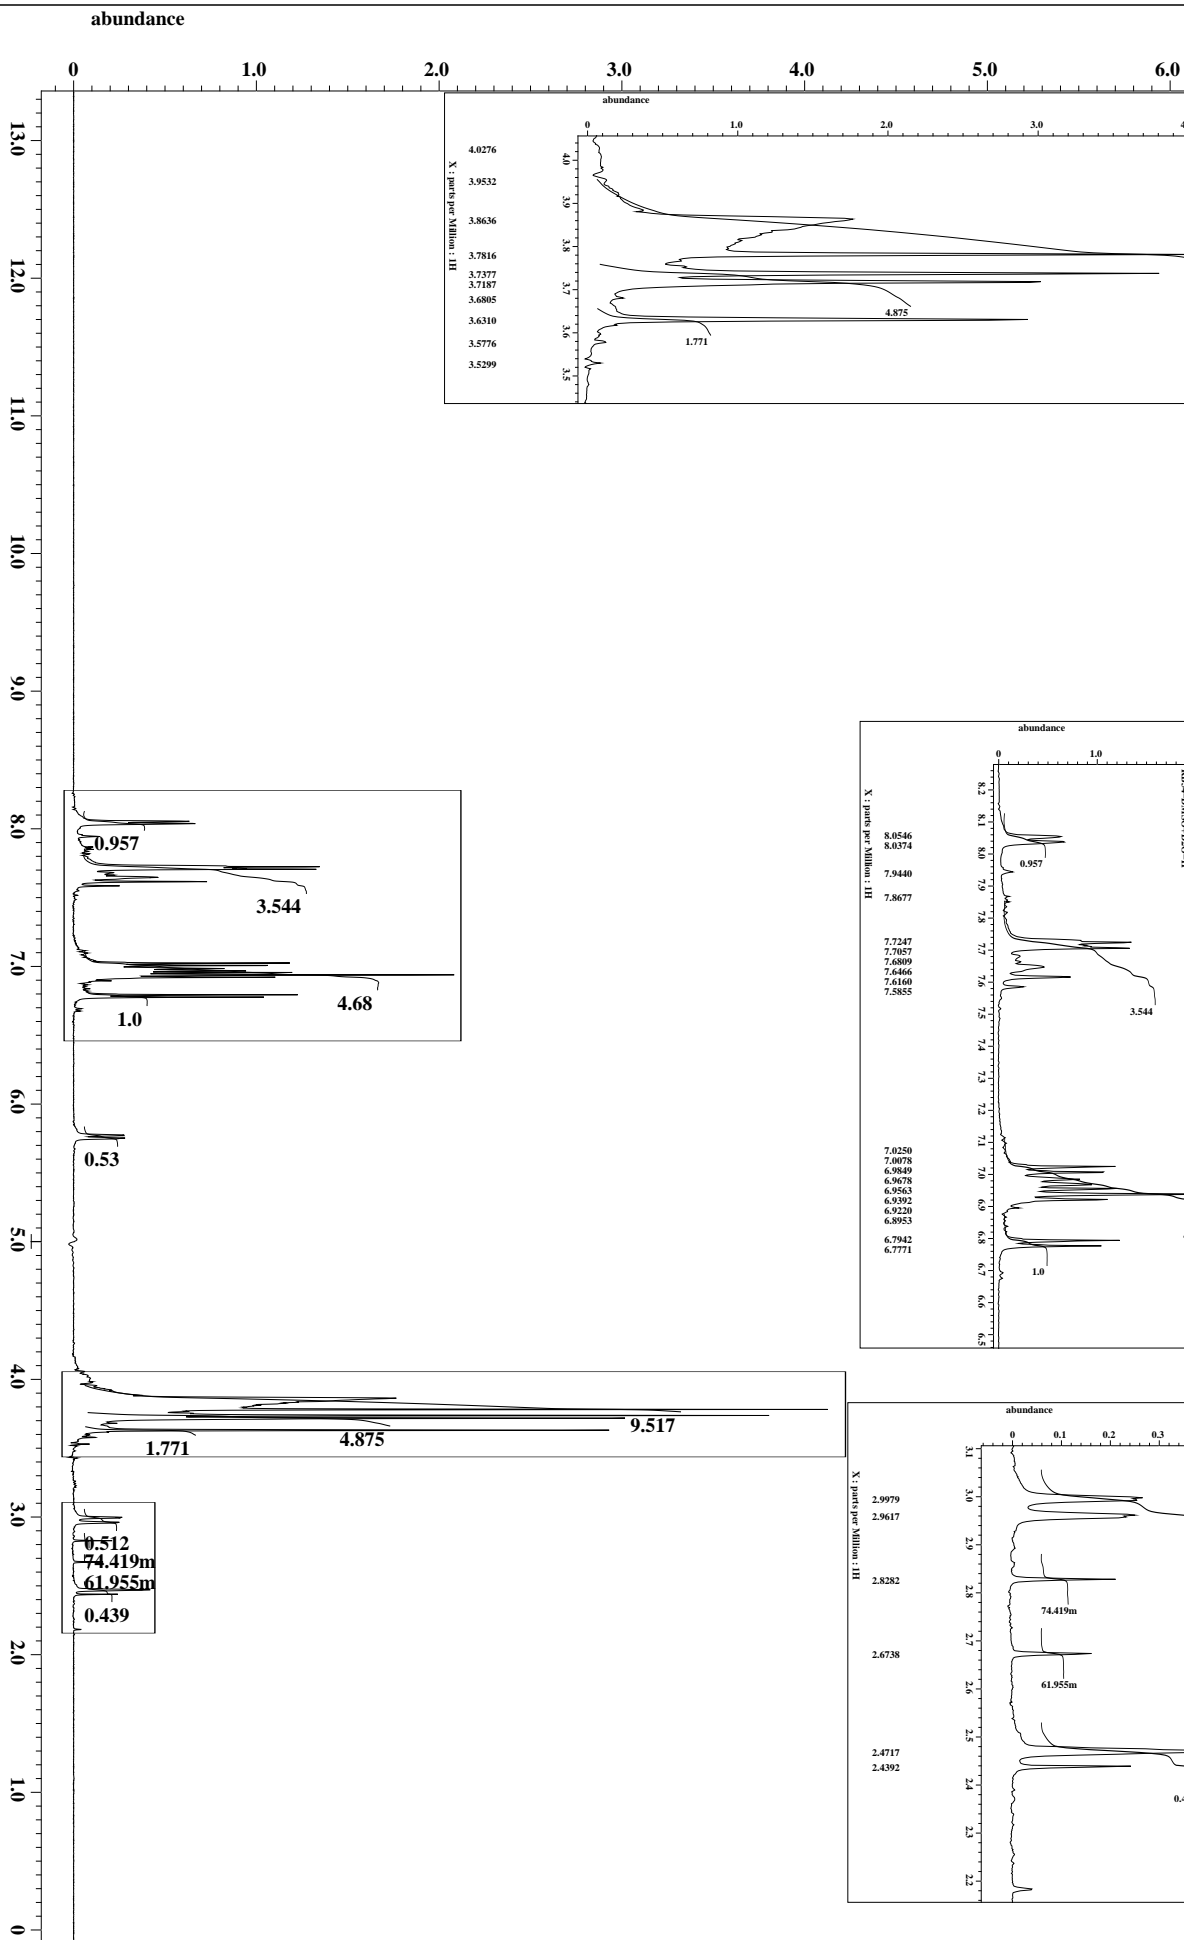

8.0546  
8.0374  
7.7247  
7.7057  
7.6466  
7.6160  
7.0250  
6.9563  
6.9392  
6.7942

5.7741  
5.7532

3.8636  
3.7816  
3.7377  
3.7187  
3.6805  
3.6310

2.9979  
2.9617  
2.8282  
2.6738  
2.4717  
2.4392

X : parts per Million : 1H

Supplement: s1 [file s1]

X : parts per Million : 1H

7.9059  
7.7972  
7.7800

7.0059  
6.9792  
6.9620  
6.8362

5.8142  
5.7913

4.3670

3.7930  
3.7702  
3.6767  
3.4155  
3.4022  
3.3564  
3.0742  
3.0399

2.4698

1.0378  
1.0244  
1.0111

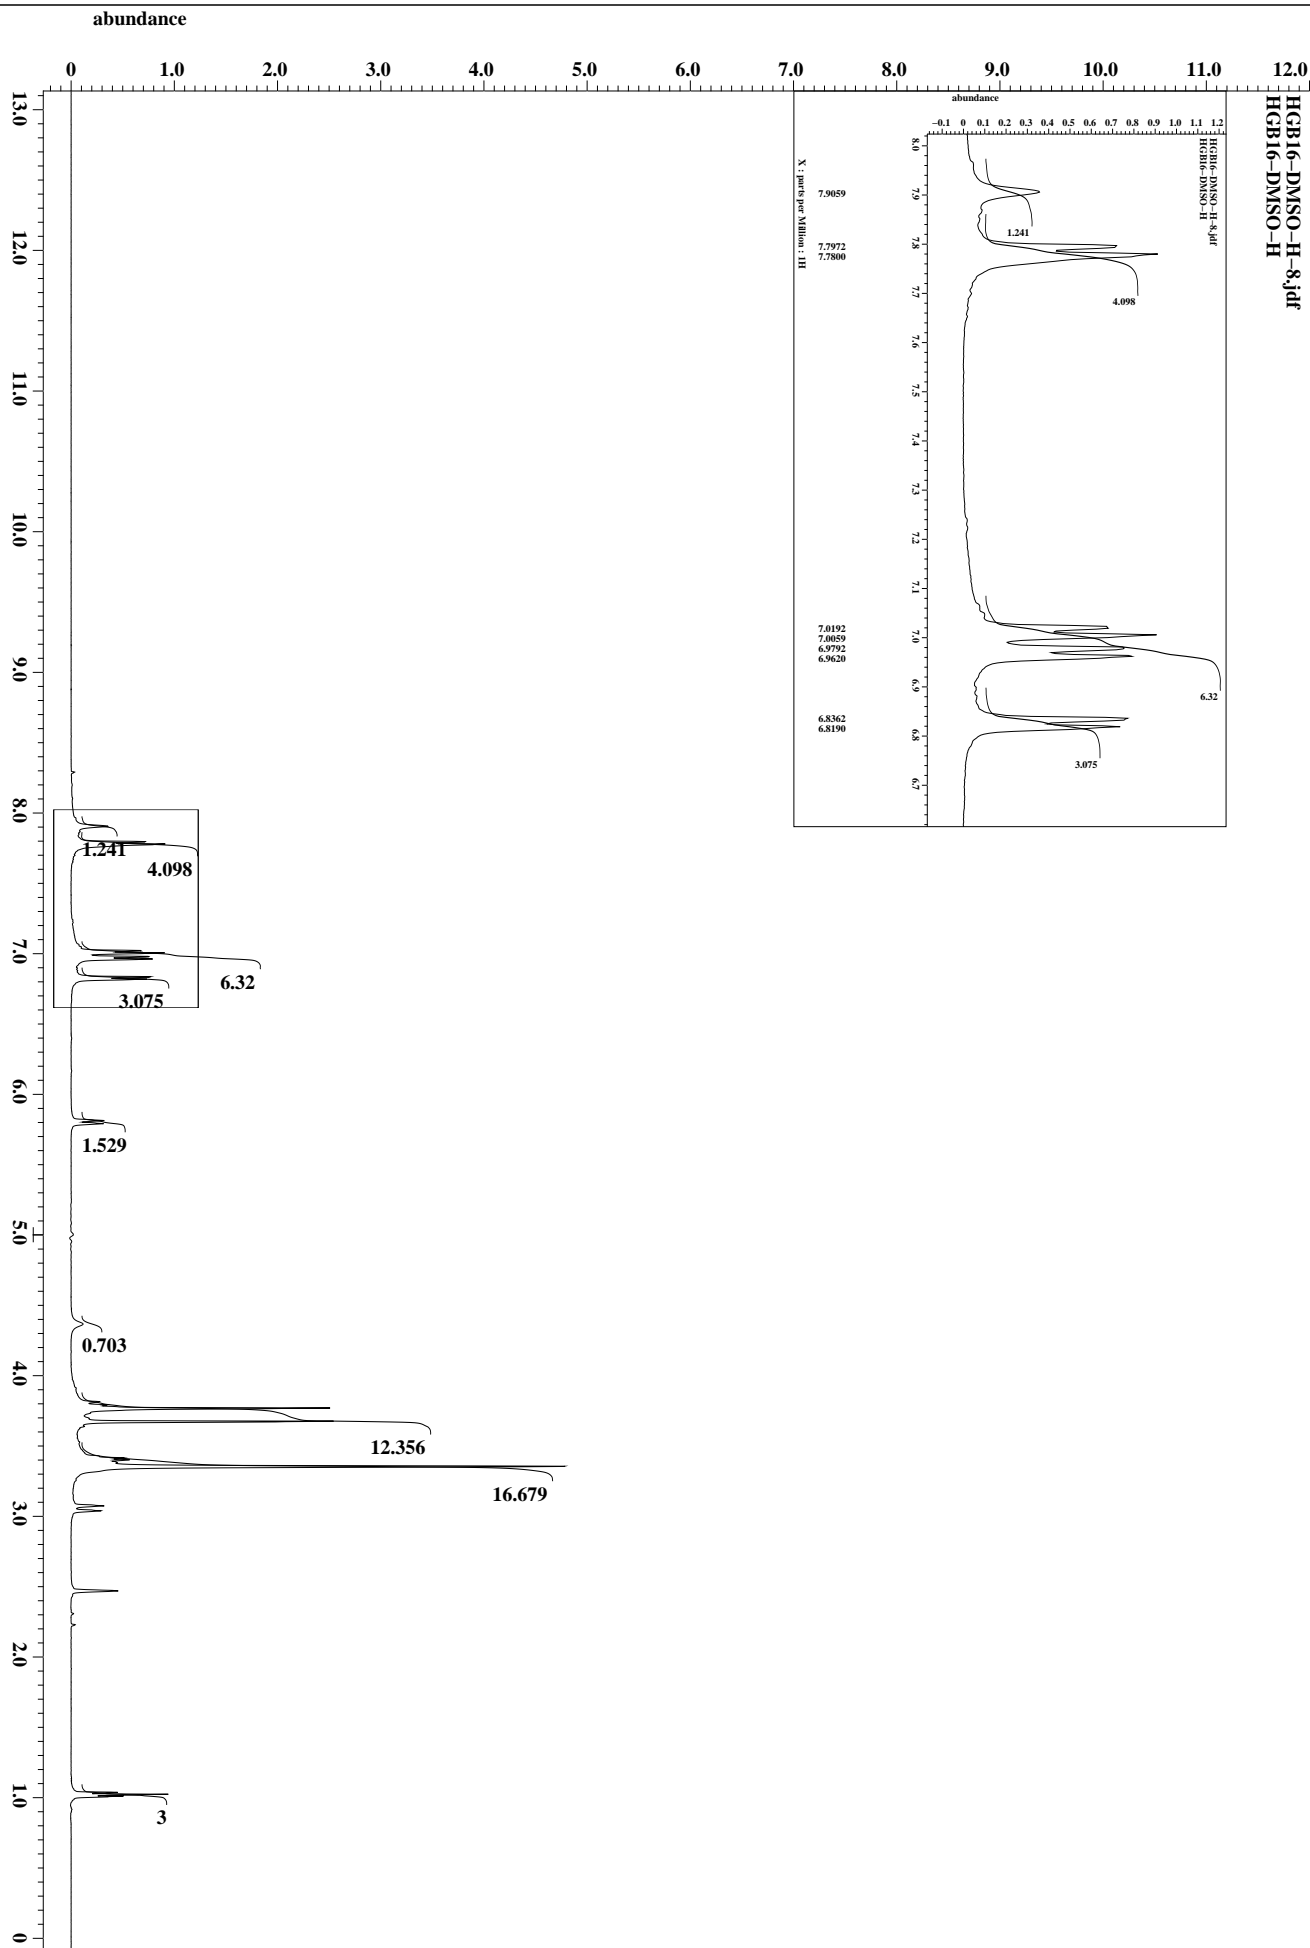

Supplement: s1 [file s1]

X : parts per Million : 1H

11.3399

8.1385  
8.1194  
7.8239  
7.8067  
7.7915  
7.7743

7.0383  
7.0078  
6.9735  
6.8305

5.8199  
5.8027

3.8293  
3.8064  
3.7968  
3.7835  
3.7625  
3.7511  
3.6710  
3.3373  
3.0742  
3.0322  
2.4698

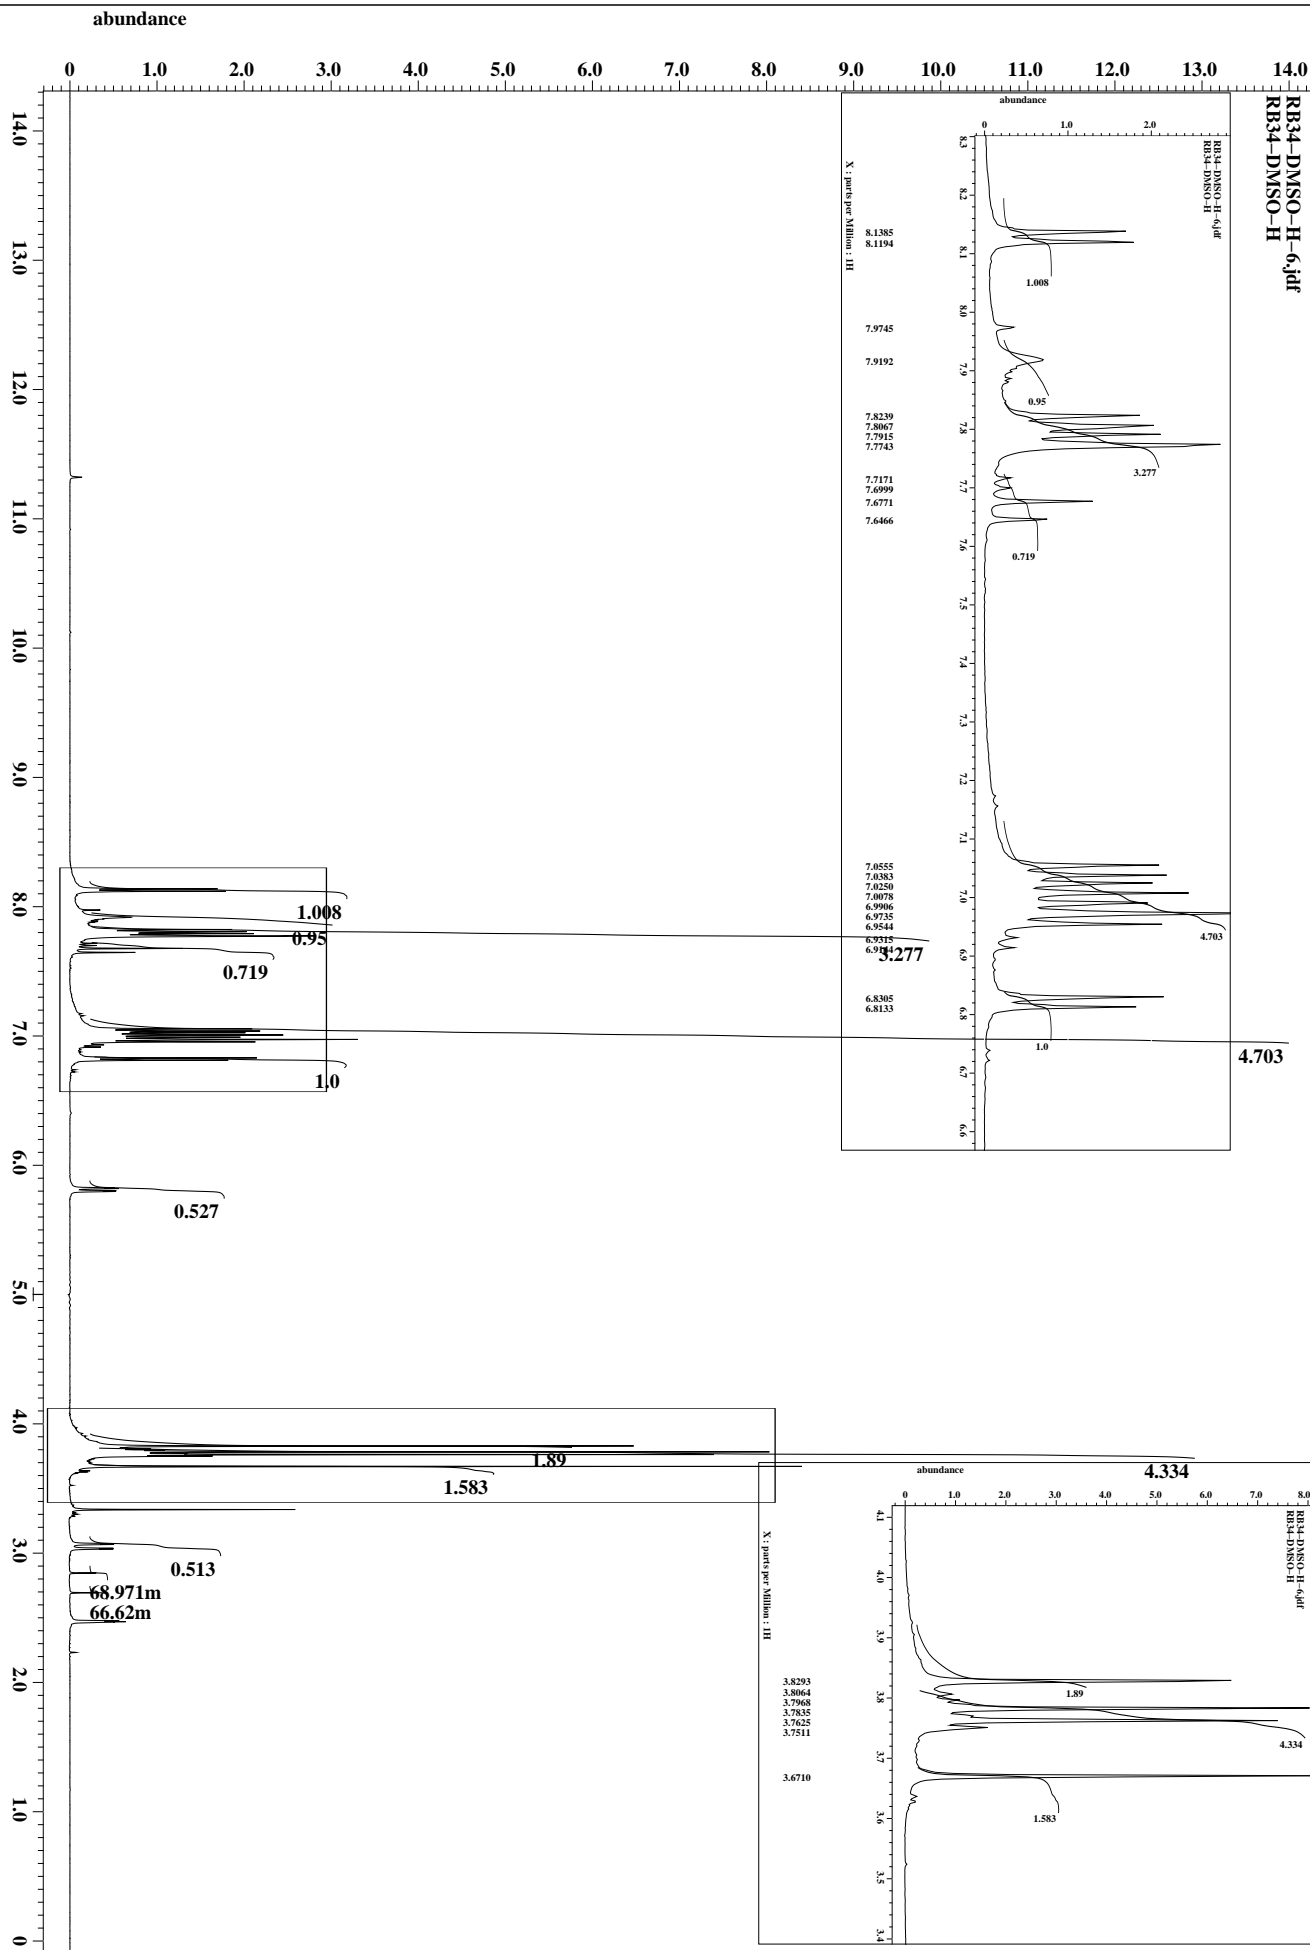

Supplement: s1 [file s1]

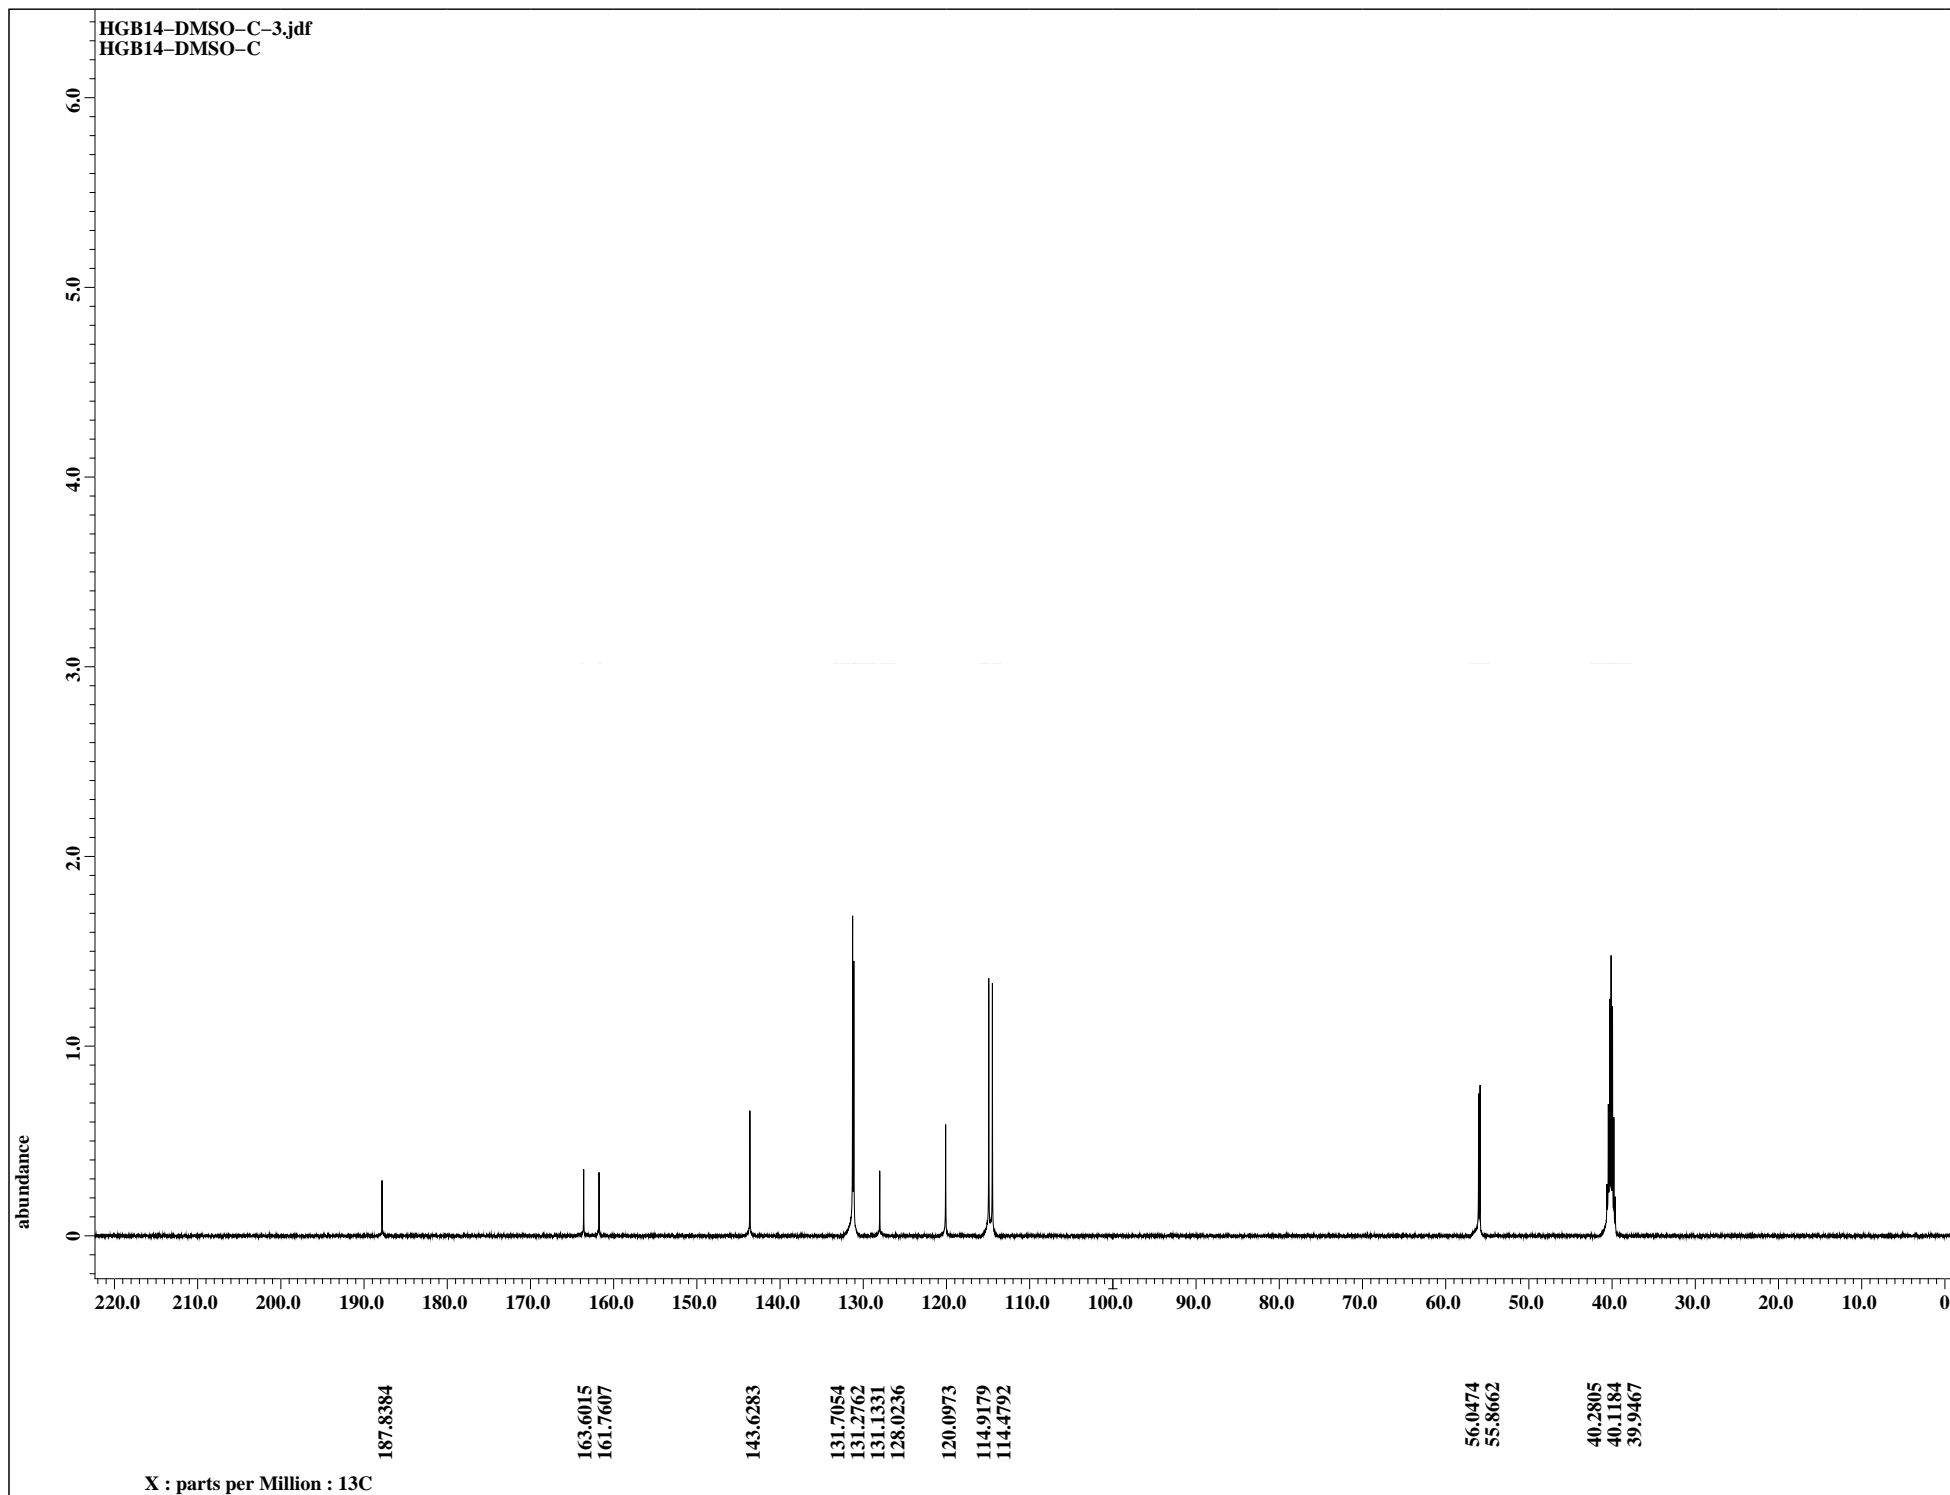

Supplement: s1 [file s1]

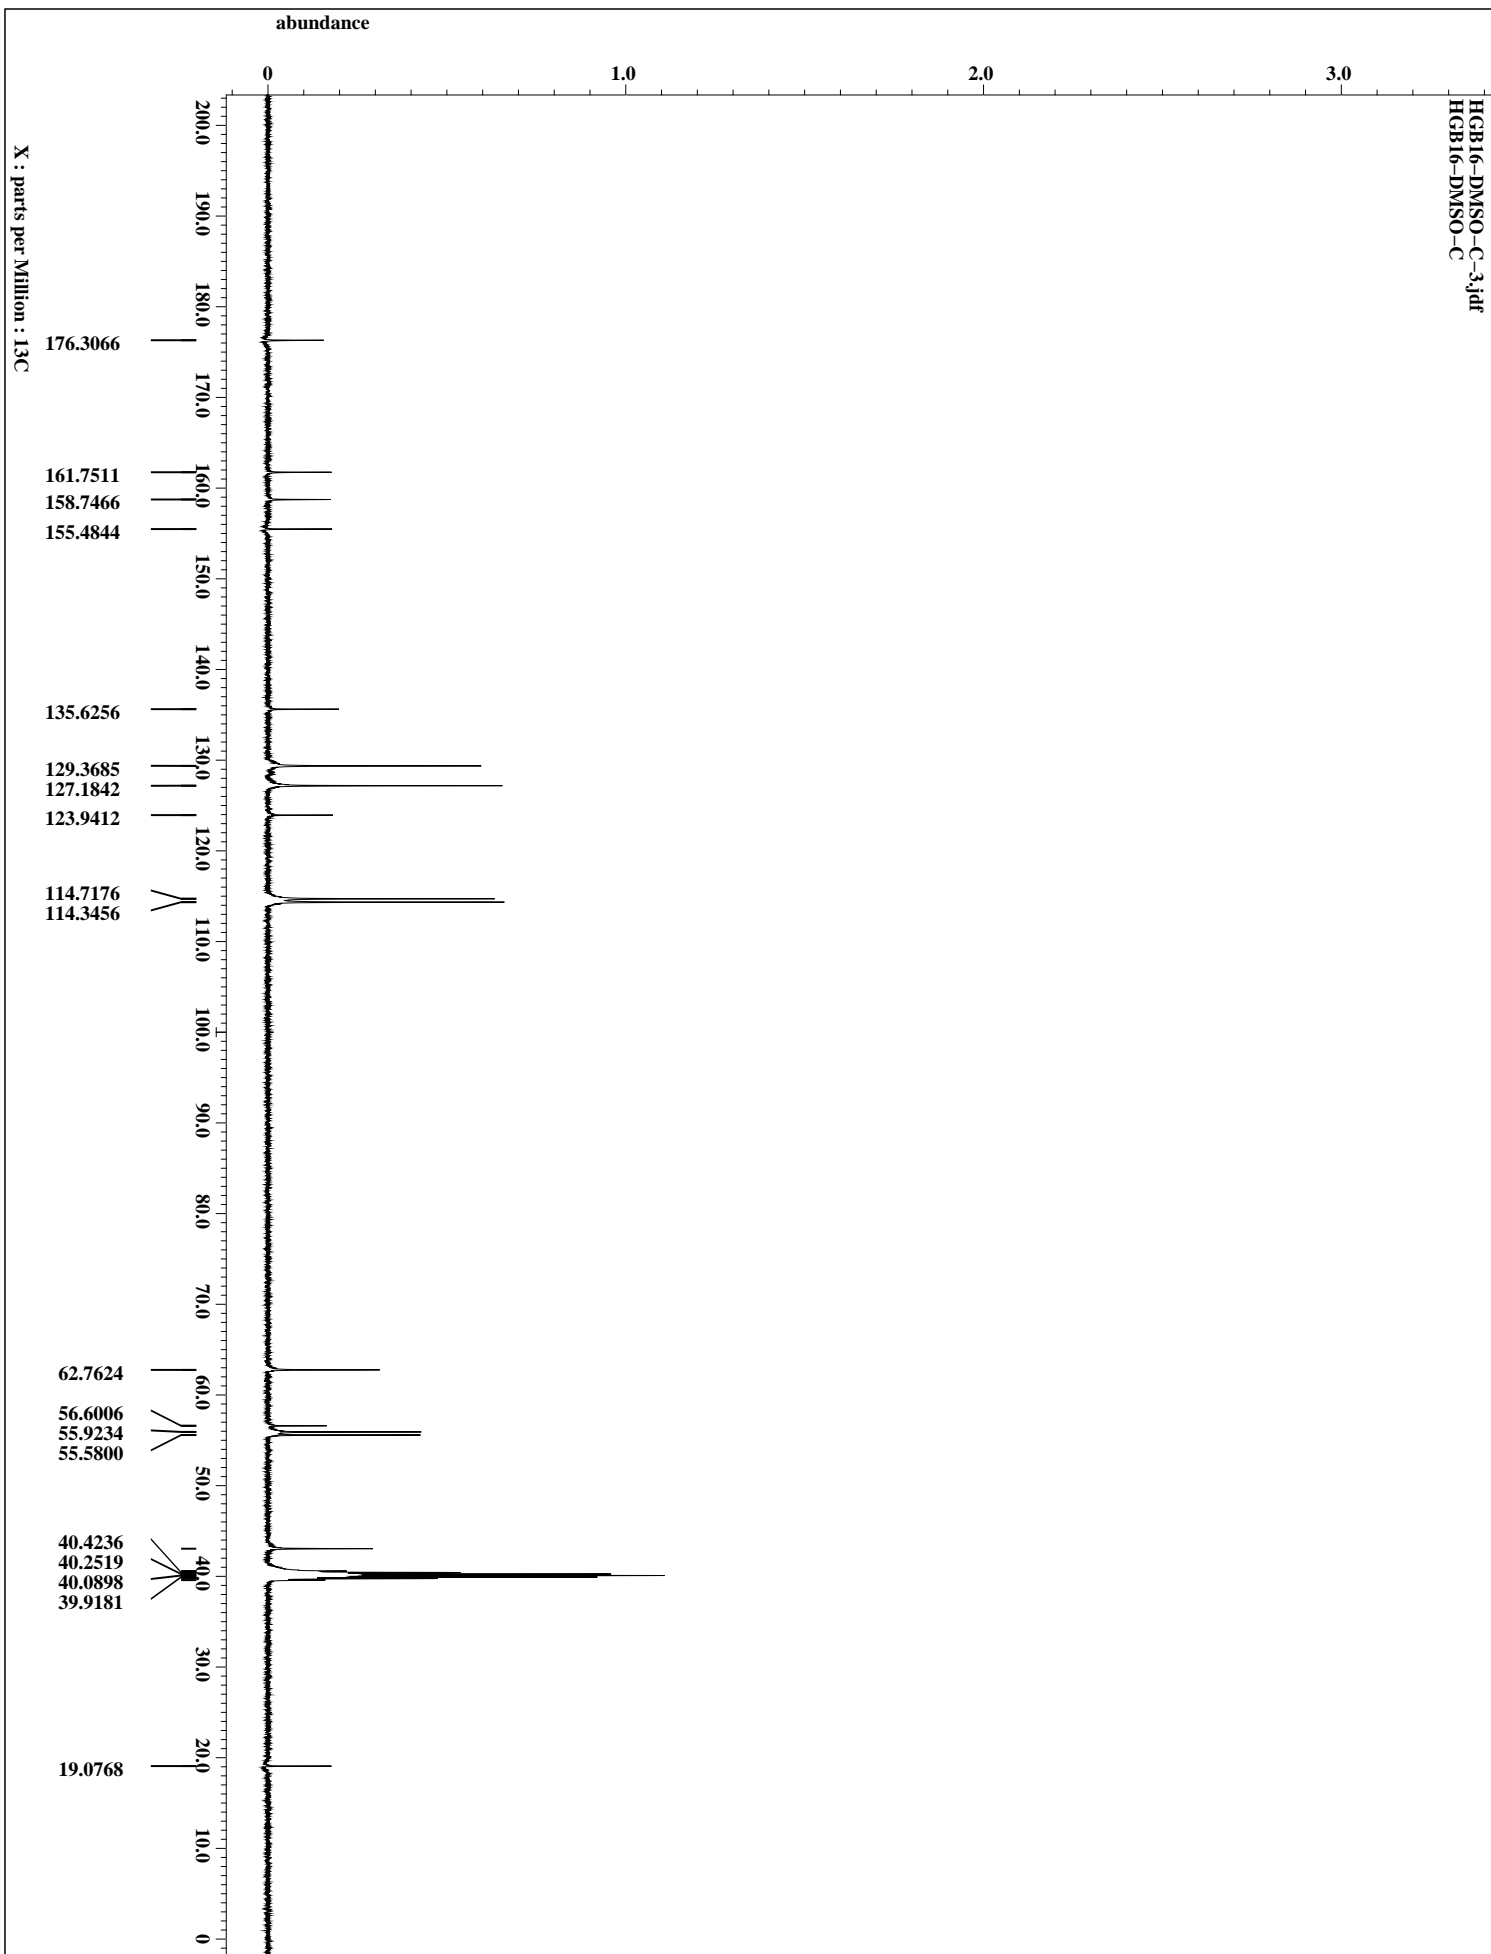

Supplement: s1 [file s1]

HGB16-DMSO-D2O-H-5 $\mu$ l  
HGB16-DMSO-D2O-H

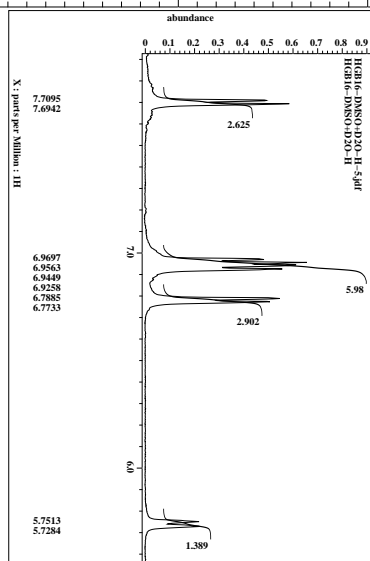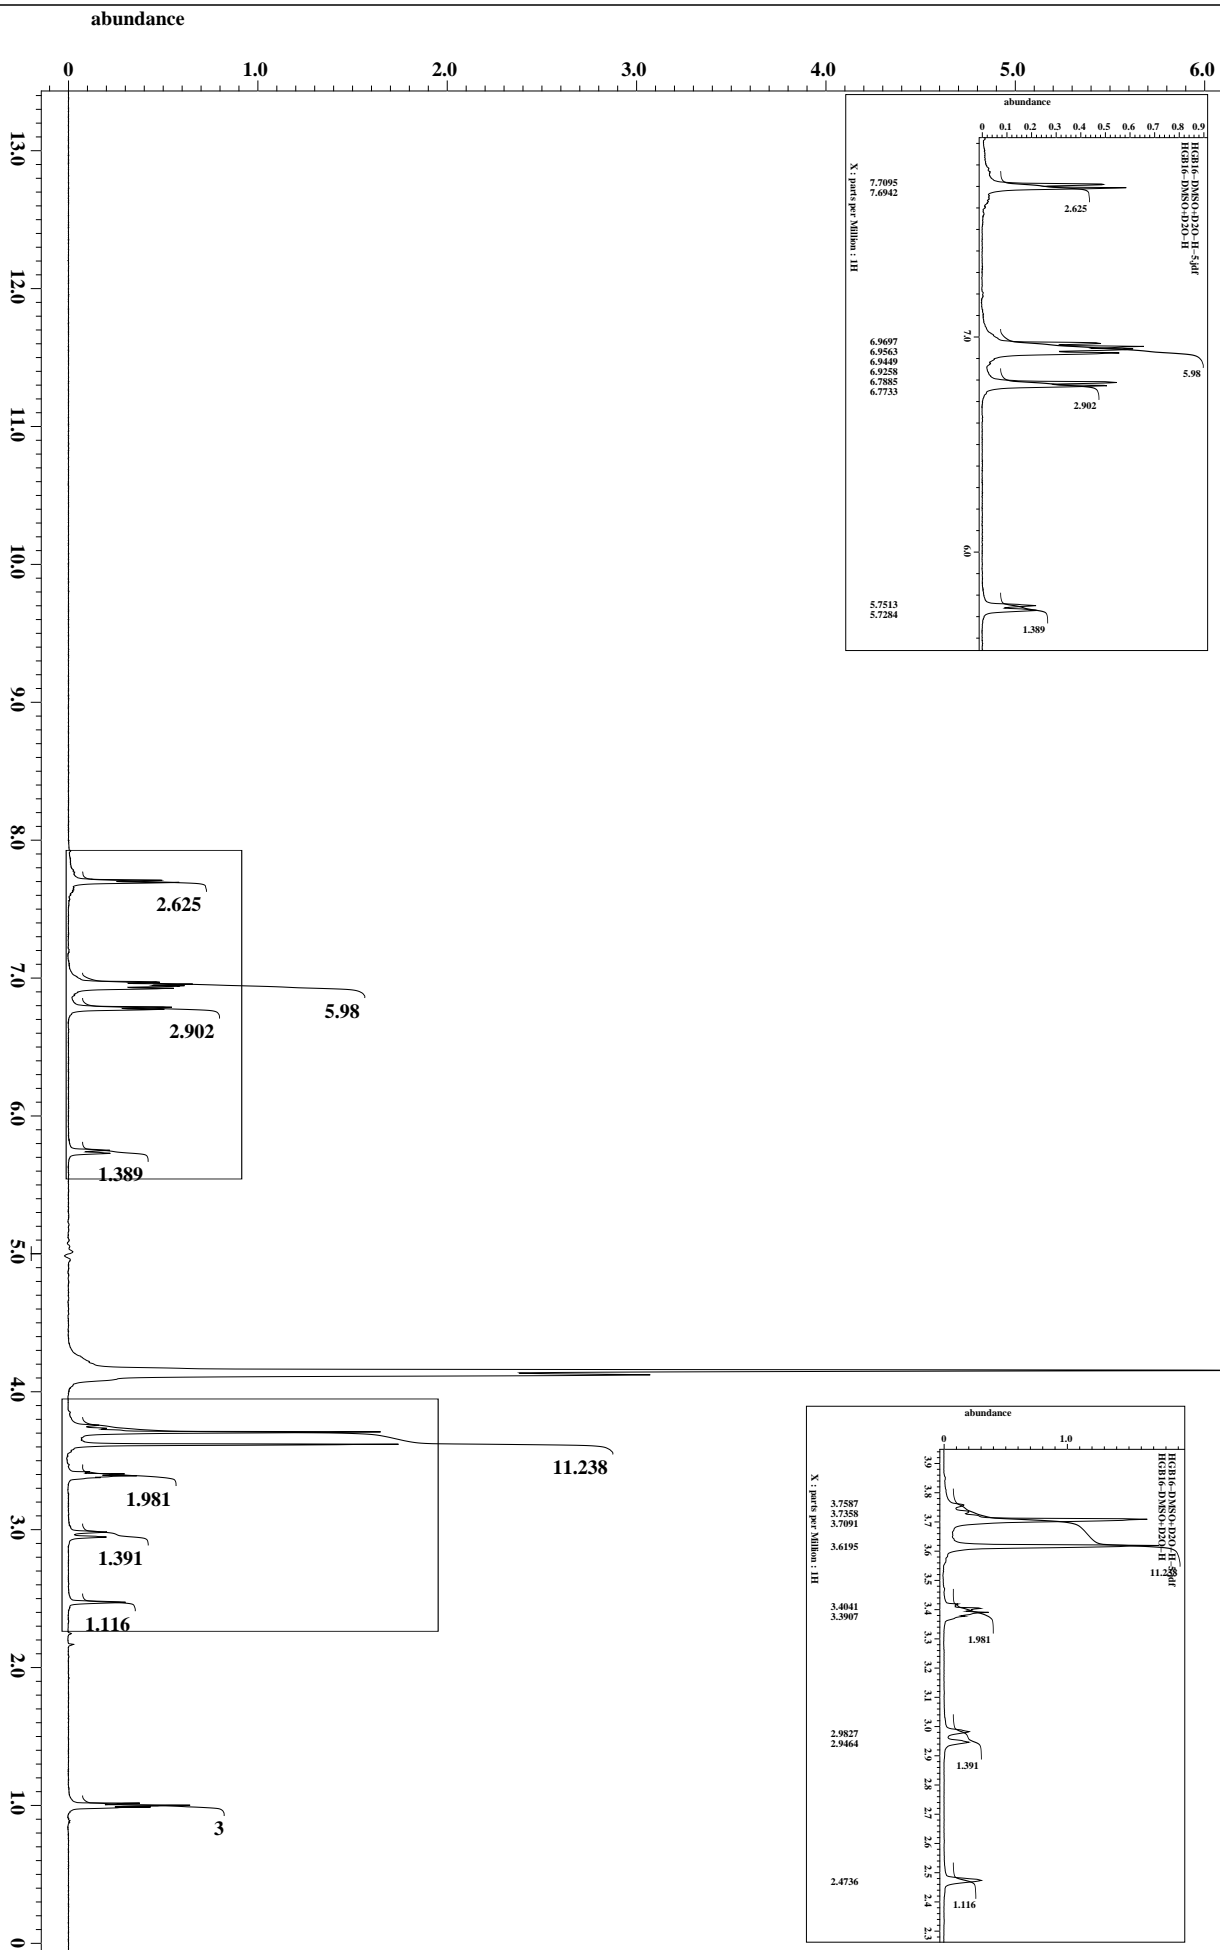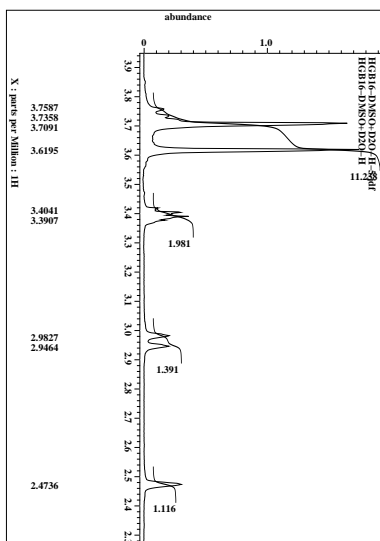

X : parts per Million : 1H

Supplement: s1 [file s1 › 1H NMR of 1 (D2O).pdf]
